# Supplementary material for: Tethering preferences of domain families co-occurring in multi-domain proteins
Source: Royal Society of Chemistry journal article supplement (doi:10.1039/c3mb25481j), 2013-03-07
Supplement: c3mb25481j.pdf [file c3mb25481j.pdf]

Table S1

Table enlisting all the domain families considered for this analysis. First column indicates the Interpro id for each of the families, second column includes the tethering number, third column indicates the population size per family. Columns D-I show the overall tethering number of each family as observed amongst protein sequences belonging to a particular group of organisms. The value indicated after pipe ('|') symbol are the associations found uniquely in a particular group. Final column indicates the average sequence similarity obtained in each family

**Tethering number of domain family** Tethering number of a family is obtained by enumerating all the unique families associated with a specific family

**Population** Number of protein sequences found within a family

**Tethering number distribution across various groups of organisms** Each column corresponding to this field indicates two values : 1) Overall tethering number obtained for a family in a particular group. 2) Number of unique associations made by a family in a specific group

**Average sequence similarity** Average of all pairwise sequence similarity values obtained for a family  
Average similarity has not been estimated for 13 families with very few or very large number of members

| Domain family (Interpro id) | Tethering number | Population | Distribution of tethering number of domain families across various groups of organisms |                |                        |                       |     |     | Fungi  Unique | Metazoa Unique | Average sequence similarity |
|-----------------------------|------------------|------------|----------------------------------------------------------------------------------------|----------------|------------------------|-----------------------|-----|-----|---------------|----------------|-----------------------------|
|                             |                  |            | Bacteria  Unique                                                                       | Archaea Unique | Unicellular eukaryotes | Viridiplantae  Unique |     |     |               |                |                             |
| IPR000021                   | 0                | 140 0 0    | 0 0                                                                                    | 0 0            | 0 0                    | 0 0                   | 0 0 | 0 0 | 0 0           | 45.52          |                             |
| IPR000028                   | 0                | 74 0 0     | 0 0                                                                                    | 0 0            | 0 0                    | 0 0                   | 0 0 | 0 0 | 0 0           | 26.37          |                             |
| IPR000036                   | 0                | 58 0 0     | 0 0                                                                                    | 0 0            | 0 0                    | 0 0                   | 0 0 | 0 0 | 0 0           | 48.14          |                             |
| IPR000074                   | 0                | 309 0 0    | 0 0                                                                                    | 0 0            | 0 0                    | 0 0                   | 0 0 | 0 0 | 0 0           | 4.86           |                             |
| IPR000096                   | 0                | 61 0 0     | 0 0                                                                                    | 0 0            | 0 0                    | 0 0                   | 0 0 | 0 0 | 0 0           | 33.36          |                             |
| IPR000117                   | 0                | 10 0 0     | 0 0                                                                                    | 0 0            | 0 0                    | 0 0                   | 0 0 | 0 0 | 0 0           | 54.04          |                             |
| IPR000151                   | 0                | 9 0 0      | 0 0                                                                                    | 0 0            | 0 0                    | 0 0                   | 0 0 | 0 0 | 0 0           | 51.86          |                             |
| IPR000226                   | 0                | 18 0 0     | 0 0                                                                                    | 0 0            | 0 0                    | 0 0                   | 0 0 | 0 0 | 0 0           | 21.69          |                             |
| IPR000249                   | 0                | 1131 1 1   | 0 0                                                                                    | 0 0            | 0 0                    | 0 0                   | 0 0 | 0 0 | 0 0           | 24.95          |                             |
| IPR000258                   | 0                | 105 0 0    | 0 0                                                                                    | 0 0            | 0 0                    | 0 0                   | 0 0 | 0 0 | 0 0           | 66.47          |                             |
| IPR000268                   | 0                | 125 0 0    | 0 0                                                                                    | 0 0            | 0 0                    | 0 0                   | 0 0 | 0 0 | 0 0           | 60.43          |                             |
| IPR000271                   | 0                | 740 0 0    | 0 0                                                                                    | 0 0            | 0 0                    | 0 0                   | 0 0 | 0 0 | 0 0           | 57.50          |                             |
| IPR000274                   | 0                | 131 0 0    | 0 0                                                                                    | 0 0            | 0 0                    | 0 0                   | 0 0 | 0 0 | 0 0           | 46.54          |                             |
| IPR000366                   | 0                | 29 0 0     | 0 0                                                                                    | 0 0            | 0 0                    | 0 0                   | 0 0 | 0 0 | 0 0           | 29.79          |                             |
| IPR000369                   | 0                | 28 0 0     | 0 0                                                                                    | 0 0            | 0 0                    | 0 0                   | 0 0 | 0 0 | 0 0           | 35.5           |                             |
| IPR000391                   | 0                | 330 0 0    | 0 0                                                                                    | 0 0            | 0 0                    | 0 0                   | 0 0 | 0 0 | 0 0           | 15.39          |                             |
| IPR000402                   | 0                | 159 0 0    | 0 0                                                                                    | 0 0            | 0 0                    | 0 0                   | 0 0 | 0 0 | 0 0           | 29.41          |                             |
| IPR000448                   | 0                | 31 0 0     | 0 0                                                                                    | 0 0            | 0 0                    | 0 0                   | 0 0 | 0 0 | 0 0           | 34.27          |                             |
| IPR000453                   | 0                | 807 0 0    | 0 0                                                                                    | 0 0            | 0 0                    | 0 0                   | 0 0 | 0 0 | 0 0           | 41.21          |                             |
| IPR000463                   | 0                | 7 0 0      | 0 0                                                                                    | 0 0            | 0 0                    | 0 0                   | 0 0 | 0 0 | 0 0           | 27.41          |                             |
| IPR000471                   | 0                | 206 0 0    | 0 0                                                                                    | 0 0            | 0 0                    | 0 0                   | 0 0 | 0 0 | 0 0           | 38.85          |                             |
| IPR000473                   | 0                | 759 0 0    | 0 0                                                                                    | 0 0            | 0 0                    | 0 0                   | 0 0 | 0 0 | 0 0           | 54.02          |                             |
| IPR000492                   | 0                | 10 0 0     | 0 0                                                                                    | 0 0            | 0 0                    | 0 0                   | 0 0 | 0 0 | 0 0           | 65.29          |                             |
| IPR000509                   | 0                | 99 0 0     | 0 0                                                                                    | 0 0            | 0 0                    | 0 0                   | 0 0 | 0 0 | 0 0           | 51.32          |                             |
| IPR000511                   | 0                | 104 0 0    | 0 0                                                                                    | 0 0            | 0 0                    | 0 0                   | 0 0 | 0 0 | 0 0           | 41.45          |                             |
| IPR000518                   | 0                | 46 0 0     | 0 0                                                                                    | 0 0            | 0 0                    | 0 0                   | 0 0 | 0 0 | 0 0           | 38.72          |                             |
| IPR000526                   | 0                | 16 0 0     | 0 0                                                                                    | 0 0            | 1 1                    | 0 0                   | 0 0 | 0 0 | 0 0           | 60.51          |                             |
| IPR000532                   | 0                | 125 0 0    | 0 0                                                                                    | 0 0            | 0 0                    | 0 0                   | 0 0 | 0 0 | 0 0           | 39.45          |                             |
| IPR000548                   | 0                | 31 0 0     | 0 0                                                                                    | 0 0            | 0 0                    | 0 0                   | 0 0 | 0 0 | 0 0           | 80.13          |                             |
| IPR000549                   | 0                | 79 0 0     | 0 0                                                                                    | 0 0            | 0 0                    | 0 0                   | 0 0 | 0 0 | 0 0           | 32.56          |                             |
| IPR000604                   | 0                | 7 0 0      | 0 0                                                                                    | 0 0            | 0 0                    | 0 0                   | 0 0 | 0 0 | 0 0           | 50.99          |                             |
| IPR000612                   | 0                | 353 0 0    | 0 0                                                                                    | 0 0            | 0 0                    | 0 0                   | 0 0 | 0 0 | 0 0           | 42.77          |                             |
| IPR000678                   | 0                | 13 0 0     | 0 0                                                                                    | 0 0            | 0 0                    | 0 0                   | 0 0 | 0 0 | 0 0           | 62.23          |                             |
| IPR000686                   | 0                | 16 0 0     | 0 0                                                                                    | 0 0            | 0 0                    | 0 0                   | 0 0 | 0 0 | 0 0           | 50.06          |                             |
| IPR000688                   | 0                | 415 0 0    | 0 0                                                                                    | 0 0            | 0 0                    | 0 0                   | 0 0 | 0 0 | 0 0           | 25.69          |                             |
| IPR000758                   | 0                | 190 0 0    | 0 0                                                                                    | 0 0            | 0 0                    | 0 0                   | 0 0 | 0 0 | 0 0           | 41.4           |                             |
| IPR000764                   | 0                | 12 0 0     | 0 0                                                                                    | 0 0            | 0 0                    | 0 0                   | 0 0 | 0 0 | 0 0           | 15.9           |                             |
| IPR000769                   | 0                | 12 0 0     | 0 0                                                                                    | 0 0            | 0 0                    | 0 0                   | 0 0 | 0 0 | 0 0           | 65.04          |                             |
| IPR000779                   | 0                | 29 0 0     | 0 0                                                                                    | 0 0            | 0 0                    | 0 0                   | 0 0 | 0 0 | 0 0           | 67.93          |                             |
| IPR000789                   | 0                | 104 0 0    | 0 0                                                                                    | 0 0            | 0 0                    | 0 0                   | 0 0 | 0 0 | 0 0           | 65.07          |                             |
| IPR000794                   | 0                | 10 0 0     | 0 0                                                                                    | 0 0            | 0 0                    | 0 0                   | 0 0 | 0 0 | 0 0           | 23.11          |                             |
| IPR000824                   | 0                | 30 0 0     | 0 0                                                                                    | 0 0            | 0 0                    | 0 0                   | 0 0 | 0 0 | 0 0           | 71.28          |                             |
| IPR000879                   | 0                | 11 0 0     | 0 0                                                                                    | 0 0            | 0 0                    | 0 0                   | 0 0 | 0 0 | 0 0           | 41.15          |                             |
| IPR000892                   | 0                | 121 0 0    | 0 0                                                                                    | 0 0            | 0 0                    | 0 0                   | 0 0 | 0 0 | 0 0           | 55.13          |                             |
| IPR000940                   | 0                | 40 0 0     | 0 0                                                                                    | 0 0            | 0 0                    | 0 0                   | 0 0 | 0 0 | 0 0           | 25.57          |                             |
| IPR000956                   | 0                | 88 0 0     | 0 0                                                                                    | 0 0            | 0 0                    | 0 0                   | 0 0 | 0 0 | 0 0           | 53.49          |                             |
| IPR000966                   | 0                | 50 0 0     | 0 0                                                                                    | 0 0            | 0 0                    | 0 0                   | 0 0 | 0 0 | 0 0           | 63.01          |                             |
| IPR000989                   | 0                | 31 0 0     | 0 0                                                                                    | 0 0            | 0 0                    | 0 0                   | 0 0 | 0 0 | 0 0           | 28.45          |                             |
| IPR000990                   | 0                | 230 0 0    | 0 0                                                                                    | 0 0            | 0 0                    | 0 0                   | 0 0 | 0 0 | 0 0           | 21.58          |                             |
| IPR000996                   | 0                | 116 0 0    | 0 0                                                                                    | 0 0            | 0 0                    | 0 0                   | 0 0 | 0 0 | 0 0           | 23.57          |                             |
| IPR001040                   | 0                | 345 0 0    | 0 0                                                                                    | 0 0            | 0 0                    | 0 0                   | 0 0 | 0 0 | 0 0           | 27.42          |                             |
| IPR001058                   | 0                | 38 0 0     | 0 0                                                                                    | 0 0            | 0 0                    | 0 0                   | 0 0 | 0 0 | 0 0           | 58.27          |                             |
| IPR001109                   | 0                | 426 0 0    | 0 0                                                                                    | 0 0            | 0 0                    | 0 0                   | 0 0 | 0 0 | 0 0           | 33.71          |                             |
| IPR001123                   | 0                | 2677 0 0   | 0 0                                                                                    | 0 0            | 0 0                    | 0 0                   | 0 0 | 0 0 | 0 0           | 14.42          |                             |
| IPR001133                   | 0                | 1158 0 0   | 0 0                                                                                    | 0 0            | 0 0                    | 0 0                   | 0 0 | 0 0 | 0 0           | 23.25          |                             |
| IPR001185                   | 0                | 563 0 0    | 0 0                                                                                    | 0 0            | 0 0                    | 0 0                   | 0 0 | 0 0 | 0 0           | 40.45          |                             |
| IPR001195                   | 0                | 36 0 0     | 0 0                                                                                    | 0 0            | 0 0                    | 0 0                   | 0 0 | 0 0 | 0 0           | 42.82          |                             |
| IPR001210                   | 0                | 157 0 0    | 0 0                                                                                    | 0 0            | 0 0                    | 0 0                   | 0 0 | 0 0 | 0 0           | 55.78          |                             |
| IPR001259                   | 0                | 163 0 0    | 0 0                                                                                    | 0 0            | 0 0                    | 0 0                   | 0 0 | 0 0 | 0 0           | 38.06          |                             |
| IPR001260                   | 0                | 454 0 0    | 0 0                                                                                    | 0 0            | 0 0                    | 0 0                   | 0 0 | 0 0 | 0 0           | 47.84          |                             |
| IPR001319                   | 0                | 6 0 0      | 0 0                                                                                    | 0 0            | 0 0                    | 0 0                   | 0 0 | 0 0 | 0 0           | 88.75          |                             |
| IPR001323                   | 0                | 30 0 0     | 0 0                                                                                    | 0 0            | 0 0                    | 0 0                   | 0 0 | 0 0 | 0 0           | 36.75          |                             |
| IPR001325                   | 0                | 35 0 0     | 0 0                                                                                    | 0 0            | 0 0                    | 0 0                   | 0 0 | 0 0 | 0 0           | 41.34          |                             |
| IPR001349                   | 0                | 110 0 0    | 0 0                                                                                    | 0 0            | 0 0                    | 0 0                   | 0 0 | 0 0 | 0 0           | 33.26          |                             |
| IPR001379                   | 0                | 3 0 0      | 0 0                                                                                    | 0 0            | 0 0                    | 0 0                   | 0 0 | 0 0 | 0 0           | 54.84          |                             |
| IPR001384                   | 0                | 46 0 0     | 0 0                                                                                    | 0 0            | 0 0                    | 0 0                   | 0 0 | 0 0 | 0 0           | 29.8           |                             |
| IPR001400                   | 0                | 192 0 0    | 0 0                                                                                    | 0 0            | 0 0                    | 0 0                   | 0 0 | 0 0 | 0 0           | 28.11          |                             |
| IPR001414                   | 0                | 10 0 0     | 0 0                                                                                    | 0 0            | 0 0                    | 0 0                   | 0 0 | 0 0 | 0 0           | 51.02          |                             |
| IPR001429                   | 0                | 121 0 0    | 0 0                                                                                    | 0 0            | 0 0                    | 0 0                   | 0 0 | 0 0 | 0 0           | 41.34          |                             |
| IPR001447                   | 0                | 325 0 0    | 0 0                                                                                    | 0 0            | 0 0                    | 0 0                   | 0 0 | 0 0 | 0 0           | 19.94          |                             |
| IPR001448                   | 0                | 345 0 0    | 0 0                                                                                    | 0 0            | 0 0                    | 0 0                   | 0 0 | 0 0 | 0 0           | 35.71          |                             |
| IPR001470                   | 0                | 23 0 0     | 0 0                                                                                    | 0 0            | 0 0                    | 0 0                   | 0 0 | 0 0 | 0 0           | 52.2           |                             |
| IPR001499                   | 0                | 59 0 0     | 0 0                                                                                    | 0 0            | 0 0                    | 0 0                   | 0 0 | 0 0 | 0 0           | 25.76          |                             |
| IPR001559                   | 0                | 169 0 0    | 0 0                                                                                    | 0 0            | 0 0                    | 0 0                   | 0 0 | 0 0 | 0 0           | 28.1           |                             |
| IPR001573                   | 0                | 23 0 0     | 0 0                                                                                    | 0 0            | 0 0                    | 0 0                   | 1 1 | 0 0 | 0 0           | 42.55          |                             |
| IPR001588                   | 0                | 44 0 0     | 0 0                                                                                    | 0 0            | 0 0                    | 0 0                   | 0 0 | 0 0 | 0 0           | 15.1           |                             |
| IPR001612                   | 0                | 50 0 0     | 0 0                                                                                    | 0 0            | 0 0                    | 0 0                   | 0 0 | 0 0 | 0 0           | 47.89          |                             |
| IPR001614                   | 0                | 82 0 0     | 0 0                                                                                    | 0 0            | 0 0                    | 0 0                   | 0 0 | 0 0 | 0 0           | 48.05          |                             |
| IPR001615                   | 0                | 11 0 0     | 0 0                                                                                    | 0 0            | 0 0                    | 0 0                   | 0 0 | 0 0 | 0 0           | 31.49          |                             |
| IPR001624                   | 0                | 465 0 0    | 0 0                                                                                    | 0 0            | 0 0                    | 0 0                   | 0 0 | 0 0 | 0 0           | 22.26          |                             |
| IPR001645                   | 0                | 23 0 0     | 0 0                                                                                    | 0 0            | 0 0                    | 0 0                   | 0 0 | 0 0 | 0 0           | 27.12          |                             |
| IPR001651                   | 0                | 24 0 0     | 0 0                                                                                    | 0 0            | 0 0                    | 0 0                   | 0 0 | 0 0 | 0 0           | 33.44          |                             |
| IPR001653                   | 0                | 1380 0 0   | 0 0                                                                                    | 0 0            | 0 0                    | 0 0                   | 0 0 | 0 0 | 0 0           | 20.04          |                             |
| IPR001656                   | 0                | 363 0 0    | 0 0                                                                                    | 0 0            | 0 0                    | 0 0                   | 0 0 | 0 0 | 0 0           | 20.27          |                             |
| IPR001668                   | 0                | 60 0 0     | 0 0                                                                                    | 0 0            | 0 0                    | 0 0                   | 0 0 | 0 0 | 0 0           | 20.11          |                             |
| IPR001690                   | 0                | 191 0 0    | 0 0                                                                                    | 0 0            | 0 0                    | 0 0                   | 0 0 | 0 0 | 0 0           | 15.85          |                             |
| IPR001702                   | 0                | 1399 0 0   | 0 0                                                                                    | 0 0            | 0 0                    | 0 0                   | 0 0 | 0 0 | 0 0           | 18.37          |                             |
| IPR001704                   | 0                | 10 0 0     | 0 0                                                                                    | 0 0            | 0 0                    | 0 0                   | 0 0 | 0 0 | 0 0           | 63.6           |                             |
| IPR001705                   | 0                | 940 0 0    | 0 0                                                                                    | 0 0            | 0 0                    | 0 0                   | 0 0 | 0 0 | 0 0           | 37.6           |                             |
| IPR001719                   | 0                | 411 0 0    | 0 0                                                                                    | 0 0            | 0 0                    | 0 0                   | 0 0 | 0 0 | 0 0           | 27.57          |                             |
| IPR001729                   | 0                | 5 0 0      | 0 0                                                                                    | 0 0            | 0 0                    | 0 0                   | 0 0 | 0 0 | 0 0           | 82.52          |                             |
| IPR001733                   | 0                | 8 0 0      | 0 0                                                                                    | 0 0            | 0 0                    | 0 0                   | 0 0 | 0 0 | 0 0           | 38.58          |                             |
| IPR001743                   | 0                | 43 0 0     | 0 0                                                                                    | 0 0            | 0 0                    | 0 0                   | 0 0 | 0 0 | 0 0           | 66.82          |                             |
| IPR001780                   | 0                | 110 0 0    | 0 0                                                                                    | 0 0            | 0 0                    | 0 0                   | 0 0 | 0 0 | 0 0           | 52.32          |                             |
| IPR001801                   | 0                | 616 0 0    | 0 0                                                                                    | 0 0            | 0 0                    | 0 0                   | 0 0 | 0 0 | 0 0           | 23.34          |                             |
| IPR001863                   | 0                | 101 0 0    | 0 0                                                                                    | 0 0            | 0 0                    | 0 0                   | 0 0 | 0 0 | 0 0           | 25.9           |                             |
| IPR001869                   | 0                | 93 0 0     | 0 0                                                                                    | 0 0            | 0 0                    | 0 0                   | 0 0 | 0 0 | 0 0           | 47.48          |                             |
| IPR001890                   | 0                | 665 0 0    | 0 0                                                                                    | 0 0            | 0 0                    | 0 0                   | 0 0 | 0 0 | 0 0           | 20.28          |                             |
| IPR001911                   | 0                | 821 0 0    | 0 0                                                                                    | 0 0            | 0 0                    | 0 0                   | 0 0 | 0 0 | 0 0           | 34.02          |                             |
| IPR001916                   | 0                | 272 0 0    | 0 0                                                                                    | 0 0            | 0 0                    | 0 0                   | 0 0 | 0 0 | 0 0           | 39.13          |                             |
| IPR001928                   | 0                | 54 0 0     | 0 0                                                                                    | 0 0            | 0 0                    | 0 0                   | 0 0 | 0 0 | 0 0           | 53.29          |                             |
| IPR001955                   | 0                | 36 0 0     | 0 0                                                                                    | 0 0            | 0 0                    | 0 0                   | 0 0 | 0 0 | 0 0           | 61.11          |                             |
| IPR001990                   | 0                | 32 0 0     | 0 0                                                                                    | 0 0            | 0 0                    | 0 0                   | 0 0 | 0 0 | 0 0           | 23.42          |                             |
| IPR002000                   | 0                | 114 0 0    | 0 0                                                                                    | 0 0            | 0 0                    | 0 0                   | 0 0 | 0 0 | 0 0           | 20.08          |                             |
| IPR002003                   | 0                | 8 0 0      | 0 0                                                                                    | 0 0            | 0 0                    | 0 0                   | 0 0 | 0 0 | 0 0           | 47.65          |                             |
| IPR002038                   | 0                | 26 0 0     | 0 0                                                                                    | 0 0            | 0 0                    | 0 0                   | 0 0 | 0 0 | 0 0           | 67.07          |                             |
| IPR002041                   | 0                | 138 0 0    | 0 0                                                                                    | 0 0            | 0 0                    | 0 0                   | 0 0 | 0 0 | 0 0           | 71.89          |                             |
| IPR002042                   | 0                | 212 0 0    | 0 0                                                                                    | 0 0            | 0 0                    | 0 0                   | 0 0 | 0 0 | 0 0           | 19.05          |                             |
| IPR002084                   | 0                | 112 0 0    | 0 0                                                                                    | 0 0            | 0 0                    | 0 0                   | 0 0 | 0 0 | 0 0           | 85.6           |                             |
| IPR002101                   | 0                | 21 0 0     | 0 0                                                                                    | 0 0            | 0 0                    | 0 0                   | 0 0 | 0 0 | 0 0           | 36.64          |                             |
| IPR002155                   | 0                | 286 0 0    | 0 0                                                                                    | 0 0            | 0 0                    | 0 0                   | 0 0 | 0 0 | 0 0           | 19.81          |                             |
| IPR002161                   | 0                | 298 0 0    | 0 0                                                                                    | 0 0            | 0 0                    | 0 0                   | 0 0 | 0 0 | 0 0           | 42.94          |                             |
| IPR002176                   | 0                | 630 0 0    | 0 0                                                                                    | 0 0            | 0 0                    | 0 0                   | 0 0 | 0 0 | 0 0           | 35.84          |                             |
| IPR002217                   | 0                | 12 0 0     | 0 0                                                                                    | 0 0            | 0 0                    | 0 0                   | 0 0 | 0 0 | 0 0           | 87.28          |                             |
| IPR002293                   | 0                | 157 0 0    | 0 0                                                                                    | 0 0            | 0 0                    | 0 0                   | 0 0 | 0 0 | 0 0           | 7.43           |                             |
| IPR002306                   | 0                | 7 0 0      | 0 0                                                                                    | 0 0            | 0 0                    | 0 0                   | 0 0 | 0 0 | 0 0           | 11.82          |                             |
| IPR002452                   | 0                | 4          |                                                                                        |                |                        |                       |     |     |               |                |                             |

|           |   |          |     |     |     |     |     |       |
|-----------|---|----------|-----|-----|-----|-----|-----|-------|
| IPR002672 | 0 | 89 0 0   | 0 0 | 0 0 | 0 0 | 0 0 | 0 0 | 36.37 |
| IPR002680 | 0 | 113 0 0  | 0 0 | 0 0 | 0 0 | 0 0 | 0 0 | 36.84 |
| IPR002682 | 0 | 49 0 0   | 0 0 | 0 0 | 0 0 | 0 0 | 0 0 | 67.74 |
| IPR002685 | 0 | 141 0 0  | 0 0 | 0 0 | 0 0 | 0 0 | 0 0 | 41.66 |
| IPR002712 | 0 | 68 0 0   | 0 0 | 0 0 | 0 0 | 0 0 | 0 0 | 34.25 |
| IPR002718 | 0 | 583 0 0  | 0 0 | 0 0 | 0 0 | 0 0 | 0 0 | 33    |
| IPR002723 | 0 | 46 0 0   | 0 0 | 0 0 | 0 0 | 0 0 | 0 0 | 23    |
| IPR002725 | 0 | 644 0 0  | 0 0 | 0 0 | 0 0 | 0 0 | 0 0 | 18.47 |
| IPR002730 | 0 | 115 0 0  | 0 0 | 0 0 | 0 0 | 0 0 | 0 0 | 24.81 |
| IPR002739 | 0 | 85 0 0   | 0 0 | 0 0 | 0 0 | 0 0 | 0 0 | 18.56 |
| IPR002743 | 0 | 121 0 0  | 0 0 | 0 0 | 0 0 | 0 0 | 0 0 | 12.35 |
| IPR002746 | 0 | 23 0 0   | 0 0 | 0 0 | 0 0 | 0 0 | 0 0 | 25.38 |
| IPR002749 | 0 | 33 0 0   | 0 0 | 0 0 | 0 0 | 0 0 | 0 0 | 21.64 |
| IPR002753 | 0 | 36 0 0   | 0 0 | 0 0 | 0 0 | 0 0 | 0 0 | 32.8  |
| IPR002758 | 0 | 347 0 0  | 0 0 | 0 0 | 0 0 | 0 0 | 0 0 | 22.06 |
| IPR002760 | 0 | 18 0 0   | 0 0 | 0 0 | 0 0 | 0 0 | 0 0 | 21.92 |
| IPR002763 | 0 | 567 0 0  | 0 0 | 0 0 | 0 0 | 0 0 | 0 0 | 19.17 |
| IPR002765 | 0 | 424 0 0  | 0 0 | 0 0 | 0 0 | 0 0 | 0 0 | 32.03 |
| IPR002770 | 0 | 86 0 0   | 0 0 | 0 0 | 0 0 | 0 0 | 0 0 | 25.81 |
| IPR002771 | 0 | 744 0 0  | 0 0 | 0 0 | 0 0 | 0 0 | 0 0 | 24.78 |
| IPR002774 | 0 | 126 0 0  | 0 0 | 0 0 | 0 0 | 0 0 | 0 0 | 12.63 |
| IPR002778 | 0 | 132 0 0  | 0 0 | 0 0 | 0 0 | 0 0 | 0 0 | 30.52 |
| IPR002780 | 0 | 327 0 0  | 0 0 | 0 0 | 0 0 | 0 0 | 0 0 | 44.4  |
| IPR002795 | 0 | 83 0 0   | 0 0 | 0 0 | 0 0 | 0 0 | 0 0 | 42.28 |
| IPR002802 | 0 | 49 0 0   | 0 0 | 0 0 | 0 0 | 0 0 | 0 0 | 23.12 |
| IPR002803 | 0 | 62 0 0   | 0 0 | 0 0 | 0 0 | 0 0 | 0 0 | 54.01 |
| IPR002812 | 0 | 69 0 0   | 0 0 | 0 0 | 0 0 | 0 0 | 0 0 | 35.92 |
| IPR002822 | 0 | 169 0 0  | 0 0 | 0 0 | 0 0 | 0 0 | 0 0 | 30.56 |
| IPR002823 | 0 | 427 0 0  | 0 0 | 0 0 | 0 0 | 0 0 | 0 0 | 32.45 |
| IPR002844 | 0 | 17 0 0   | 0 0 | 0 0 | 0 0 | 0 0 | 0 0 | 56.82 |
| IPR002882 | 0 | 534 0 0  | 0 0 | 0 0 | 0 0 | 0 0 | 0 0 | 23.21 |
| IPR002908 | 0 | 285 0 0  | 0 0 | 0 0 | 0 0 | 0 0 | 0 0 | 28.77 |
| IPR002918 | 0 | 108 0 0  | 0 0 | 0 0 | 0 0 | 0 0 | 0 0 | 19.34 |
| IPR002994 | 0 | 418 0 0  | 0 0 | 0 0 | 0 0 | 0 0 | 0 0 | 18.02 |
| IPR003019 | 0 | 78 0 0   | 0 0 | 0 0 | 0 0 | 0 0 | 0 0 | 79.33 |
| IPR003059 | 0 | 3 0 0    | 0 0 | 0 0 | 0 0 | 0 0 | 0 0 | 68.81 |
| IPR003063 | 0 | 4 0 0    | 0 0 | 0 0 | 0 0 | 0 0 | 0 0 | 39.58 |
| IPR003066 | 0 | 16 0 0   | 0 0 | 0 0 | 0 0 | 0 0 | 0 0 | 59.88 |
| IPR003157 | 0 | 10 0 0   | 0 0 | 0 0 | 0 0 | 0 0 | 0 0 | 35.5  |
| IPR003162 | 0 | 97 0 0   | 0 0 | 0 0 | 0 0 | 0 0 | 0 0 | 31.36 |
| IPR003177 | 0 | 93 0 0   | 0 0 | 0 0 | 0 0 | 0 0 | 0 0 | 32.97 |
| IPR003178 | 0 | 21 0 0   | 0 0 | 0 0 | 0 0 | 0 0 | 0 0 | 62.65 |
| IPR003179 | 0 | 42 0 0   | 0 0 | 0 0 | 0 0 | 0 0 | 0 0 | 30.94 |
| IPR003180 | 0 | 357 0 0  | 0 0 | 0 0 | 0 0 | 0 0 | 0 0 | 32.87 |
| IPR003197 | 0 | 97 0 0   | 0 0 | 0 0 | 0 0 | 0 0 | 0 0 | 37.15 |
| IPR003199 | 0 | 255 0 0  | 0 0 | 0 0 | 0 0 | 0 0 | 0 0 | 18.79 |
| IPR003207 | 0 | 52 0 0   | 0 0 | 0 0 | 0 0 | 0 0 | 0 0 | 58.31 |
| IPR003209 | 0 | 50 0 0   | 0 0 | 0 0 | 0 0 | 0 0 | 0 0 | 41.57 |
| IPR003211 | 0 | 47 0 0   | 0 0 | 0 0 | 0 0 | 0 0 | 0 0 | 37.94 |
| IPR003212 | 0 | 15 0 0   | 0 0 | 0 0 | 0 0 | 0 0 | 0 0 | 96.35 |
| IPR003213 | 0 | 181 0 0  | 0 0 | 0 0 | 0 0 | 0 0 | 0 0 | 26.75 |
| IPR003223 | 0 | 11 0 0   | 0 0 | 0 0 | 0 0 | 0 0 | 0 0 | 60.82 |
| IPR003256 | 0 | 22 0 0   | 0 0 | 0 0 | 0 0 | 0 0 | 0 0 | 34.88 |
| IPR003332 | 0 | 5 0 0    | 0 0 | 0 0 | 0 0 | 0 0 | 0 0 | 41.33 |
| IPR003359 | 0 | 60 0 0   | 0 0 | 0 0 | 0 0 | 0 0 | 0 0 | 46.93 |
| IPR003369 | 0 | 1211 0 0 | 0 0 | 0 0 | 0 0 | 0 0 | 0 0 | 28.25 |
| IPR003375 | 0 | 54 0 0   | 0 0 | 0 0 | 0 0 | 0 0 | 0 0 | 65.69 |
| IPR003398 | 0 | 53 0 0   | 0 0 | 0 0 | 0 0 | 0 0 | 0 0 | 53.27 |
| IPR003417 | 0 | 42 0 0   | 0 0 | 0 0 | 0 0 | 0 0 | 0 0 | 60.39 |
| IPR003418 | 0 | 97 0 0   | 0 0 | 0 0 | 0 0 | 0 0 | 0 0 | 63.8  |
| IPR003420 | 0 | 17 0 0   | 0 0 | 0 0 | 0 0 | 0 0 | 0 0 | 63.28 |
| IPR003426 | 0 | 10 0 0   | 0 0 | 0 0 | 0 0 | 0 0 | 0 0 | 87.92 |
| IPR003427 | 0 | 9 0 0    | 0 0 | 0 0 | 0 0 | 0 0 | 0 0 | 41.64 |
| IPR003432 | 0 | 6 0 0    | 0 0 | 0 0 | 0 0 | 0 0 | 0 0 | 76.93 |
| IPR003443 | 0 | 52 0 0   | 0 0 | 0 0 | 0 0 | 0 0 | 0 0 | 25.17 |
| IPR003446 | 0 | 43 0 0   | 0 0 | 0 0 | 0 0 | 0 0 | 0 0 | 42.09 |
| IPR003452 | 0 | 18 0 0   | 0 0 | 0 0 | 0 0 | 0 0 | 0 0 | 54.91 |
| IPR003454 | 0 | 59 0 0   | 0 0 | 0 0 | 0 0 | 0 0 | 0 0 | 29.71 |
| IPR003459 | 0 | 65 0 0   | 0 0 | 0 0 | 0 0 | 0 0 | 0 0 | 24.2  |
| IPR003464 | 0 | 130 0 0  | 0 0 | 0 0 | 0 0 | 0 0 | 0 0 | 44.32 |
| IPR003477 | 0 | 620 0 0  | 0 0 | 0 0 | 0 0 | 0 0 | 0 0 | 17.55 |
| IPR003507 | 0 | 475 0 0  | 0 0 | 0 0 | 0 0 | 0 0 | 0 0 | 20.29 |
| IPR003510 | 0 | 97 0 0   | 0 0 | 0 0 | 0 0 | 0 0 | 0 0 | 58.75 |
| IPR003519 | 0 | 8 0 0    | 0 0 | 0 0 | 0 0 | 0 0 | 0 0 | 76.12 |
| IPR003536 | 0 | 9 0 0    | 0 0 | 0 0 | 0 0 | 0 0 | 0 0 | 22.23 |
| IPR003544 | 0 | 346 0 0  | 0 0 | 0 0 | 0 0 | 0 0 | 0 0 | 24.8  |
| IPR003664 | 0 | 645 0 0  | 0 0 | 0 0 | 0 0 | 0 0 | 0 0 | 35.69 |
| IPR003666 | 0 | 47 0 0   | 0 0 | 0 0 | 0 0 | 0 0 | 0 0 | 50.75 |
| IPR003671 | 0 | 140 0 0  | 0 0 | 0 0 | 0 0 | 0 0 | 0 0 | 38.09 |
| IPR003674 | 0 | 227 0 0  | 0 0 | 11  | 0 0 | 0 0 | 0 0 | 14.65 |
| IPR003678 | 0 | 63 0 0   | 0 0 | 0 0 | 0 0 | 0 0 | 0 0 | 36.29 |
| IPR003679 | 0 | 80 0 0   | 0 0 | 0 0 | 0 0 | 0 0 | 0 0 | 23.3  |
| IPR003685 | 0 | 52 0 0   | 0 0 | 0 0 | 0 0 | 0 0 | 0 0 | 67.09 |
| IPR003686 | 0 | 45 0 0   | 0 0 | 0 0 | 0 0 | 0 0 | 0 0 | 72.08 |
| IPR003687 | 0 | 48 0 0   | 0 0 | 0 0 | 0 0 | 0 0 | 0 0 | 74.64 |
| IPR003738 | 0 | 588 1 1  | 0 0 | 0 0 | 0 0 | 0 0 | 0 0 | 24.32 |
| IPR003739 | 0 | 6 0 0    | 0 0 | 0 0 | 0 0 | 0 0 | 0 0 | 32.41 |
| IPR003744 | 0 | 423 0 0  | 0 0 | 0 0 | 0 0 | 0 0 | 0 0 | 21.02 |
| IPR003746 | 0 | 402 0 0  | 0 0 | 0 0 | 0 0 | 0 0 | 0 0 | 29.84 |
| IPR003752 | 0 | 517 0 0  | 0 0 | 0 0 | 0 0 | 0 0 | 0 0 | 14.39 |
| IPR003761 | 0 | 687 0 0  | 0 0 | 0 0 | 0 0 | 0 0 | 0 0 | 33.38 |
| IPR003763 | 0 | 94 0 0   | 0 0 | 0 0 | 0 0 | 0 0 | 0 0 | 43.52 |
| IPR003766 | 0 | 202 0 0  | 0 0 | 0 0 | 0 0 | 0 0 | 0 0 | 35.61 |
| IPR003768 | 0 | 559 0 0  | 0 0 | 0 0 | 0 0 | 0 0 | 0 0 | 20.87 |
| IPR003795 | 0 | 300 0 0  | 0 0 | 0 0 | 0 0 | 0 0 | 0 0 | 21.68 |
| IPR003804 | 0 | 525 0 0  | 0 0 | 0 0 | 0 0 | 0 0 | 0 0 | 27.82 |
| IPR003805 | 0 | 468 0 0  | 0 0 | 0 0 | 0 0 | 0 0 | 0 0 | 20.18 |
| IPR003810 | 0 | 627 0 0  | 0 0 | 0 0 | 0 0 | 0 0 | 0 0 | 20.78 |
| IPR003815 | 0 | 288 0 0  | 0 0 | 0 0 | 0 0 | 0 0 | 0 0 | 42.77 |
| IPR003824 | 0 | 795 0 0  | 0 0 | 0 0 | 0 0 | 0 0 | 0 0 | 33.64 |
| IPR003828 | 0 | 224 0 0  | 0 0 | 0 0 | 0 0 | 0 0 | 0 0 | 36.3  |
| IPR003831 | 0 | 33 0 0   | 0 0 | 0 0 | 0 0 | 0 0 | 0 0 | 46.91 |
| IPR003832 | 0 | 168 0 0  | 0 0 | 0 0 | 0 0 | 0 0 | 0 0 | 37.47 |
| IPR003849 | 0 | 709 0 0  | 0 0 | 0 0 | 0 0 | 0 0 | 0 0 | 33.78 |
| IPR003874 | 0 | 89 0 0   | 0 0 | 0 0 | 0 0 | 0 0 | 0 0 | 28.05 |
| IPR003897 | 0 | 11 0 0   | 0 0 | 0 0 | 0 0 | 0 0 | 0 0 | 47.82 |
| IPR003901 | 0 | 21 0 0   | 0 0 | 0 0 | 0 0 | 0 0 | 0 0 | 40.51 |
| IPR003996 | 0 | 31 0 0   | 0 0 | 0 0 | 0 0 | 0 0 | 0 0 | 28.27 |
| IPR004093 | 0 | 34 0 0   | 0 0 | 0 0 | 0 0 | 0 0 | 0 0 | 24.4  |
| IPR004116 | 0 | 18 0 0   | 0 0 | 0 0 | 0 0 | 0 0 | 0 0 | 87.03 |
| IPR004122 | 0 | 45 0 0   | 0 0 | 0 0 | 0 0 | 0 0 | 0 0 | 59.81 |
| IPR004123 | 0 | 99 0 0   | 0 0 | 0 0 | 0 0 | 0 0 | 0 0 | 63.15 |
| IPR004171 | 0 | 33 0 0   | 0 0 | 0 0 | 0 0 | 0 0 | 0 0 | 37.23 |
| IPR004174 | 0 | 49 0 0   | 0 0 | 0 0 | 0 0 | 0 0 | 0 0 | 37.87 |
| IPR004203 | 0 | 97 0 0   | 0 0 | 0 0 | 0 0 | 0 0 | 0 0 | 26.61 |
| IPR004205 | 0 | 63 0 0   | 0 0 | 0 0 | 0 0 | 0 0 | 0 0 | 36.61 |
| IPR004221 | 0 | 9 0 0    | 0 0 | 0 0 | 0 0 | 0 0 | 0 0 | 45.63 |
| IPR004232 | 0 | 109 0 0  | 0 0 | 0 0 | 0 0 | 0 0 | 0 0 | 37.61 |
| IPR004235 | 0 | 26 0 0   | 0 0 | 0 0 | 0 0 | 0 0 | 0 0 | 34.46 |
| IPR004239 | 0 | 26 0 0   | 0 0 | 0 0 | 0 0 | 0 0 | 0 0 | 41.66 |
| IPR004248 | 0 | 16 0 0   | 0 0 | 0 0 | 0 0 | 0 0 | 0 0 | 45.35 |
| IPR004260 | 0 | 16 0 0   | 0 0 | 0 0 | 0 0 | 0 0 | 0 0 | 40.78 |
| IPR004279 | 0 | 100 0 0  | 0 0 | 0 0 | 0 0 | 0 0 | 0 0 | 22.02 |
| IPR004281 | 0 | 19 0 0   | 0 0 | 0 0 | 0 0 | 0 0 | 0 0 | 51.66 |
| IPR004308 | 0 | 78 0 0   | 0 0 | 0 0 | 0 0 | 0 0 | 0 0 | 51.36 |
| IPR004315 | 0 | 11 0 0   | 0 0 | 0 0 | 0 0 | 0 0 | 0 0 | 72.84 |
| IPR004321 | 0 | 14 0 0   | 0 0 | 0 0 | 0 0 | 0 0 | 0 0 | 76.81 |
| IPR004324 | 0 | 110 0 0  | 0 0 | 0 0 | 0 0 | 0 0 | 0 0 | 28.47 |
| IPR004327 | 0 | 157 0 0  | 0 0 | 0 0 | 0 0 | 0 0 | 0 0 | 37.58 |
| IPR004329 | 0 | 343 0 0  | 0 0 | 0 0 | 0 0 | 0 0 | 0 0 | 32.99 |
| IPR004356 | 0 | 25 0 0   | 0 0 | 0 0 | 0 0 | 0 0 | 0 0 | 32.88 |
| IPR004375 | 0 | 335 0 0  | 0 0 | 0 0 | 0 0 | 0 0 | 0 0 | 21.3  |
| IPR004381 | 0 | 507 0 0  | 0 0 | 0 0 | 0 0 | 0 0 | 0 0 | 37.03 |
| IPR004383 | 0 | 12 0 0   | 0 0 | 0 0 | 0 0 | 0 0 | 0 0 | 27.72 |
| IPR004422 | 0 | 12 0 0   | 0 0 | 0 0 | 0 0 | 0 0 | 0 0 | 48.74 |
| IPR004445 | 0 | 236 0 0  | 0 0 | 0 0 | 0 0 | 0 0 | 0 0 | 29.7  |
| IPR004457 | 0 | 208 0 0  | 0 0 | 0 0 | 0 0 | 0 0 | 0 0 | 30.97 |
| IPR004461 | 0 | 40 0 0   | 0 0 | 0 0 | 0 0 | 0 0 | 0 0 | 40.36 |
| IPR004472 | 0 | 111 0 0  | 0 0 | 0 0 | 0 0 | 0 0 | 0 0 | 26.94 |
| IPR004485 | 0 | 603 0 0  | 0 0 | 0 0 | 0 0 | 0 0 | 0 0 | 18.35 |
| IPR004566 | 0 | 42 0 0   | 0 0 | 0 0 | 0 0 | 0 0 | 0 0 | 47.46 |
| IPR004569 | 0 | 440 0 0  | 0 0 | 0 0 | 0 0 | 0 0 | 0 0 | 44.19 |
| IPR004598 | 0 | 94 0 0   | 0 0 | 0 0 | 0 0 | 0 0 | 0 0 | 35.25 |
| IPR004612 | 0 | 125 0 0  | 0 0 | 0 0 | 0 0 | 0 0 | 0 0 | 47.91 |
| IPR004615 | 0 | 92 0 0   | 0 0 | 0 0 | 0 0 | 0 0 | 0 0 | 41.83 |
| IPR004660 | 0 | 7 0 0    | 0 0 | 0 0 | 0 0 | 0 0 | 0 0 | 66    |
| IPR00     |   |          |     |     |     |     |     |       |

|           |   |         |     |     |     |     |     |       |
|-----------|---|---------|-----|-----|-----|-----|-----|-------|
| IPR004671 | 0 | 124 0 0 | 0 0 | 0 0 | 0 0 | 0 0 | 0 0 | 72.54 |
| IPR004676 | 0 | 114 0 0 | 0 0 | 0 0 | 0 0 | 0 0 | 0 0 | 33.15 |
| IPR004679 | 0 | 180 0 0 | 0 0 | 0 0 | 0 0 | 0 0 | 0 0 | 40.53 |
| IPR004684 | 0 | 117 0 0 | 0 0 | 0 0 | 0 0 | 0 0 | 0 0 | 49.73 |
| IPR004685 | 0 | 441 0 0 | 0 0 | 0 0 | 0 0 | 0 0 | 0 0 | 33.93 |
| IPR004690 | 0 | 55 0 0  | 0 0 | 0 0 | 0 0 | 0 0 | 0 0 | 57.94 |
| IPR004692 | 0 | 746 0 0 | 0 0 | 0 0 | 0 0 | 0 0 | 0 0 | 26.69 |
| IPR004697 | 0 | 155 0 0 | 0 0 | 0 0 | 0 0 | 0 0 | 0 0 | 43.28 |
| IPR004699 | 0 | 86 0 0  | 0 0 | 0 0 | 0 0 | 0 0 | 0 0 | 66.1  |
| IPR004714 | 0 | 211 0 0 | 0 0 | 0 0 | 0 0 | 0 0 | 0 0 | 37.32 |
| IPR004716 | 0 | 105 0 0 | 0 0 | 0 0 | 0 0 | 0 0 | 0 0 | 39.69 |
| IPR004721 | 0 | 12 0 0  | 0 0 | 0 0 | 0 0 | 0 0 | 0 0 | 43.65 |
| IPR004873 | 0 | 139 0 0 | 0 0 | 0 0 | 0 0 | 0 0 | 0 0 | 36.47 |
| IPR004878 | 0 | 100 0 0 | 0 0 | 0 0 | 0 0 | 0 0 | 0 0 | 25.12 |
| IPR004893 | 0 | 63 0 0  | 0 0 | 0 0 | 0 0 | 0 0 | 0 0 | 30.14 |
| IPR004928 | 0 | 16 0 0  | 0 0 | 0 0 | 0 0 | 0 0 | 0 0 | 58.36 |
| IPR004929 | 0 | 147 0 0 | 0 0 | 0 0 | 0 0 | 0 0 | 0 0 | 40.36 |
| IPR004944 | 0 | 42 0 0  | 0 0 | 0 0 | 0 0 | 0 0 | 0 0 | 53.51 |
| IPR004947 | 0 | 49 0 0  | 0 0 | 0 0 | 0 0 | 0 0 | 0 0 | 32.43 |
| IPR004964 | 0 | 25 0 0  | 0 0 | 0 0 | 0 0 | 0 0 | 0 0 | 30.57 |
| IPR004965 | 0 | 30 0 0  | 0 0 | 0 0 | 0 0 | 0 0 | 0 0 | 37.24 |
| IPR004983 | 0 | 30 0 0  | 0 0 | 0 0 | 0 0 | 0 0 | 0 0 | 25.19 |
| IPR004992 | 0 | 236 0 0 | 0 0 | 0 0 | 0 0 | 0 0 | 0 0 | 32.19 |
| IPR004993 | 0 | 205 0 0 | 0 0 | 0 0 | 0 0 | 0 0 | 0 0 | 21.62 |
| IPR004995 | 0 | 384 0 0 | 0 0 | 0 0 | 0 0 | 0 0 | 0 0 | 31.68 |
| IPR005002 | 0 | 107 0 0 | 0 0 | 0 0 | 0 0 | 0 0 | 0 0 | 51.13 |
| IPR005019 | 0 | 594 0 0 | 0 0 | 0 0 | 0 0 | 0 0 | 0 0 | 38.25 |
| IPR005067 | 0 | 173 0 0 | 0 0 | 11  | 0 0 | 0 0 | 0 0 | 35.12 |
| IPR005076 | 0 | 54 0 0  | 0 0 | 0 0 | 0 0 | 0 0 | 0 0 | 39.24 |
| IPR005080 | 0 | 68 0 0  | 0 0 | 0 0 | 0 0 | 0 0 | 0 0 | 51.34 |
| IPR005081 | 0 | 67 0 0  | 0 0 | 0 0 | 0 0 | 0 0 | 0 0 | 25.04 |
| IPR005095 | 0 | 21 0 0  | 0 0 | 0 0 | 0 0 | 0 0 | 0 0 | 47.51 |
| IPR005096 | 0 | 13 0 0  | 0 0 | 0 0 | 0 0 | 0 0 | 0 0 | 59.98 |
| IPR005137 | 0 | 116 0 0 | 0 0 | 0 0 | 0 0 | 0 0 | 0 0 | 32.78 |
| IPR005155 | 0 | 87 0 0  | 0 0 | 0 0 | 0 0 | 0 0 | 0 0 | 44.87 |
| IPR005176 | 0 | 169 0 0 | 0 0 | 0 0 | 0 0 | 0 0 | 0 0 | 36.04 |
| IPR005177 | 0 | 445 0 0 | 0 0 | 0 0 | 0 0 | 0 0 | 0 0 | 33.15 |
| IPR005186 | 0 | 201 0 0 | 0 0 | 0 0 | 0 0 | 0 0 | 0 0 | 16    |
| IPR005212 | 0 | 39 0 0  | 0 0 | 0 0 | 0 0 | 0 0 | 0 0 | 31.83 |
| IPR005220 | 0 | 200 0 0 | 0 0 | 0 0 | 0 0 | 0 0 | 0 0 | 31.92 |
| IPR005227 | 0 | 14 0 0  | 0 0 | 0 0 | 0 0 | 0 0 | 0 0 | 24.55 |
| IPR005232 | 0 | 7 0 0   | 0 0 | 0 0 | 0 0 | 0 0 | 0 0 | 35.34 |
| IPR005243 | 0 | 75 0 0  | 0 0 | 0 0 | 0 0 | 0 0 | 0 0 | 42.42 |
| IPR005265 | 0 | 316 0 0 | 0 0 | 0 0 | 0 0 | 0 0 | 0 0 | 33.61 |
| IPR005272 | 0 | 146 0 0 | 0 0 | 0 0 | 0 0 | 0 0 | 0 0 | 42.77 |
| IPR005298 | 0 | 82 0 0  | 0 0 | 0 0 | 0 0 | 0 0 | 0 0 | 47.93 |
| IPR005299 | 0 | 257 0 0 | 0 0 | 0 0 | 0 0 | 0 0 | 0 0 | 27.2  |
| IPR005304 | 0 | 112 0 0 | 0 0 | 0 0 | 0 0 | 0 0 | 0 0 | 39.05 |
| IPR005325 | 0 | 56 0 0  | 0 0 | 0 0 | 0 0 | 0 0 | 0 0 | 26.16 |
| IPR005346 | 0 | 253 0 0 | 0 0 | 0 0 | 0 0 | 0 0 | 0 0 | 40.36 |
| IPR005351 | 0 | 46 0 0  | 0 0 | 0 0 | 0 0 | 0 0 | 0 0 | 42.79 |
| IPR005354 | 0 | 36 0 0  | 0 0 | 0 0 | 0 0 | 0 0 | 0 0 | 50.14 |
| IPR005363 | 0 | 35 0 0  | 0 0 | 0 0 | 0 0 | 0 0 | 0 0 | 43.02 |
| IPR005365 | 0 | 71 0 0  | 0 0 | 0 0 | 0 0 | 0 0 | 0 0 | 27.83 |
| IPR005366 | 0 | 58 0 0  | 0 0 | 0 0 | 0 0 | 0 0 | 0 0 | 34.37 |
| IPR005369 | 0 | 32 0 0  | 0 0 | 0 0 | 0 0 | 0 0 | 0 0 | 32.86 |
| IPR005370 | 0 | 43 0 0  | 0 0 | 0 0 | 0 0 | 0 0 | 0 0 | 40.82 |
| IPR005371 | 0 | 84 0 0  | 0 0 | 0 0 | 0 0 | 0 0 | 0 0 | 66.18 |
| IPR005372 | 0 | 151 0 0 | 0 0 | 0 0 | 0 0 | 0 0 | 0 0 | 32.63 |
| IPR005378 | 0 | 116 0 0 | 0 0 | 0 0 | 0 0 | 0 0 | 0 0 | 34.02 |
| IPR005384 | 0 | 11 0 0  | 0 0 | 0 0 | 0 0 | 0 0 | 0 0 | 91.26 |
| IPR005413 | 0 | 11 0 0  | 0 0 | 0 0 | 0 0 | 0 0 | 0 0 | 50.42 |
| IPR005485 | 0 | 6 0 0   | 0 0 | 0 0 | 0 0 | 0 0 | 0 0 | 42.42 |
| IPR005489 | 0 | 22 0 0  | 0 0 | 0 0 | 0 0 | 0 0 | 0 0 | 18    |
| IPR005497 | 0 | 40 0 0  | 0 0 | 0 0 | 0 0 | 0 0 | 0 0 | 73.58 |
| IPR005554 | 0 | 84 0 0  | 0 0 | 0 0 | 0 0 | 0 0 | 0 0 | 24.28 |
| IPR005556 | 0 | 54 0 0  | 0 0 | 0 0 | 0 0 | 0 0 | 0 0 | 41.2  |
| IPR005562 | 0 | 191 0 0 | 0 0 | 0 0 | 0 0 | 0 0 | 0 0 | 38.83 |
| IPR005564 | 0 | 70 0 0  | 0 0 | 0 0 | 0 0 | 0 0 | 0 0 | 29.89 |
| IPR005574 | 0 | 63 0 0  | 0 0 | 0 0 | 0 0 | 0 0 | 0 0 | 19.15 |
| IPR005579 | 0 | 41 0 0  | 0 0 | 0 0 | 0 0 | 0 0 | 0 0 | 41    |
| IPR005582 | 0 | 91 0 0  | 0 0 | 0 0 | 0 0 | 0 0 | 0 0 | 73.58 |
| IPR005583 | 0 | 385 0 0 | 0 0 | 0 0 | 0 0 | 0 0 | 0 0 | 28.91 |
| IPR005585 | 0 | 96 0 0  | 0 0 | 0 0 | 0 0 | 0 0 | 0 0 | 21.67 |
| IPR005588 | 0 | 187 0 0 | 0 0 | 0 0 | 0 0 | 0 0 | 0 0 | 29.53 |
| IPR005591 | 0 | 170 0 0 | 0 0 | 0 0 | 0 0 | 0 0 | 0 0 | 38.13 |
| IPR005598 | 0 | 234 0 0 | 0 0 | 0 0 | 0 0 | 0 0 | 0 0 | 15.47 |
| IPR005610 | 0 | 58 0 0  | 0 0 | 0 0 | 0 0 | 0 0 | 0 0 | 47.02 |
| IPR005618 | 0 | 404 0 0 | 0 0 | 0 0 | 0 0 | 0 0 | 0 0 | 25.42 |
| IPR005623 | 0 | 169 0 0 | 0 0 | 0 0 | 0 0 | 0 0 | 0 0 | 32.8  |
| IPR005627 | 0 | 302 0 0 | 0 0 | 0 0 | 0 0 | 0 0 | 0 0 | 31.41 |
| IPR005629 | 0 | 69 0 0  | 0 0 | 0 0 | 0 0 | 0 0 | 0 0 | 40.44 |
| IPR005642 | 0 | 191 0 0 | 0 0 | 0 0 | 0 0 | 0 0 | 0 0 | 32.81 |
| IPR005658 | 0 | 127 0 0 | 0 0 | 0 0 | 0 0 | 0 0 | 0 0 | 51.21 |
| IPR005779 | 0 | 17 0 0  | 0 0 | 0 0 | 0 0 | 0 0 | 0 0 | 57.17 |
| IPR005780 | 0 | 17 0 0  | 0 0 | 0 0 | 0 0 | 0 0 | 0 0 | 58.41 |
| IPR005854 | 0 | 6 0 0   | 0 0 | 0 0 | 0 0 | 0 0 | 0 0 | 18.66 |
| IPR005865 | 0 | 17 0 0  | 0 0 | 0 0 | 0 0 | 0 0 | 0 0 | 40.73 |
| IPR005883 | 0 | 5 0 0   | 0 0 | 0 0 | 0 0 | 0 0 | 0 0 | 32.59 |
| IPR005886 | 0 | 6 0 0   | 0 0 | 0 0 | 0 0 | 0 0 | 0 0 | 28.37 |
| IPR005915 | 0 | 92 0 0  | 0 0 | 0 0 | 0 0 | 0 0 | 0 0 | 53.72 |
| IPR005935 | 0 | 11 0 0  | 0 0 | 0 0 | 0 0 | 0 0 | 0 0 | 26.74 |
| IPR005984 | 0 | 9 0 0   | 0 0 | 0 0 | 0 0 | 0 0 | 0 0 | 88.66 |
| IPR005996 | 0 | 3 0 0   | 0 0 | 0 0 | 0 0 | 0 0 | 0 0 | 63.55 |
| IPR006008 | 0 | 330 0 0 | 0 0 | 0 0 | 0 0 | 0 0 | 0 0 | 30.02 |
| IPR006038 | 0 | 30 0 0  | 0 0 | 0 0 | 0 0 | 0 0 | 0 0 | 22.14 |
| IPR006079 | 0 | 13 0 0  | 0 0 | 0 0 | 0 0 | 0 0 | 0 0 | 74.83 |
| IPR006230 | 0 | 29 0 0  | 0 0 | 0 0 | 0 0 | 0 0 | 0 0 | 36.21 |
| IPR006279 | 0 | 134 0 0 | 0 0 | 0 0 | 0 0 | 0 0 | 0 0 | 43.98 |
| IPR006340 | 0 | 99 0 0  | 0 0 | 0 0 | 0 0 | 0 0 | 0 0 | 52.73 |
| IPR006341 | 0 | 28 0 0  | 0 0 | 0 0 | 0 0 | 0 0 | 0 0 | 60.51 |
| IPR006368 | 0 | 10 0 0  | 0 0 | 0 0 | 0 0 | 0 0 | 0 0 | 17.87 |
| IPR006396 | 0 | 30 0 0  | 0 0 | 0 0 | 0 0 | 0 0 | 0 0 | 48.44 |
| IPR006441 | 0 | 89 0 0  | 0 0 | 0 0 | 0 0 | 0 0 | 0 0 | 36.06 |
| IPR006452 | 0 | 198 0 0 | 0 0 | 0 0 | 0 0 | 0 0 | 0 0 | 16.99 |
| IPR006480 | 0 | 92 0 0  | 0 0 | 0 0 | 0 0 | 0 0 | 0 0 | 27.69 |
| IPR006482 | 0 | 121 0 0 | 0 0 | 0 0 | 0 0 | 0 0 | 0 0 | 25.37 |
| IPR006485 | 0 | 50 0 0  | 0 0 | 0 0 | 0 0 | 0 0 | 0 0 | 38.23 |
| IPR006498 | 0 | 136 0 0 | 0 0 | 0 0 | 0 0 | 0 0 | 0 0 | 27.69 |
| IPR006513 | 0 | 101 0 0 | 0 0 | 0 0 | 0 0 | 0 0 | 0 0 | 57.97 |
| IPR006516 | 0 | 29 0 0  | 0 0 | 0 0 | 0 0 | 0 0 | 0 0 | 9.13  |
| IPR006518 | 0 | 185 0 0 | 0 0 | 0 0 | 0 0 | 0 0 | 0 0 | 36.14 |
| IPR006591 | 0 | 71 0 0  | 0 0 | 0 0 | 0 0 | 0 0 | 0 0 | 55.53 |
| IPR006610 | 0 | 22 0 0  | 0 0 | 0 0 | 0 0 | 0 0 | 0 0 | 43.88 |
| IPR006611 | 0 | 146 0 0 | 0 0 | 0 0 | 0 0 | 0 0 | 0 0 | 24.87 |
| IPR006623 | 0 | 19 0 0  | 0 0 | 0 0 | 0 0 | 0 0 | 0 0 | 70.59 |
| IPR006627 | 0 | 33 0 0  | 0 0 | 0 0 | 0 0 | 0 0 | 0 0 | 66.67 |
| IPR006628 | 0 | 153 0 0 | 0 0 | 0 0 | 0 0 | 0 0 | 0 0 | 36.09 |
| IPR006631 | 0 | 350 0 0 | 0 0 | 0 0 | 0 0 | 0 0 | 0 0 | 23.59 |
| IPR006699 | 0 | 154 0 0 | 0 0 | 0 0 | 0 0 | 0 0 | 0 0 | 36.65 |
| IPR006707 | 0 | 98 0 0  | 0 0 | 0 0 | 0 0 | 0 0 | 0 0 | 12.68 |
| IPR006721 | 0 | 84 0 0  | 0 0 | 0 0 | 0 0 | 0 0 | 0 0 | 43.19 |
| IPR006728 | 0 | 119 0 0 | 0 0 | 0 0 | 0 0 | 0 0 | 0 0 | 53.46 |
| IPR006739 | 0 | 18 0 0  | 0 0 | 0 0 | 0 0 | 0 0 | 0 0 | 43.59 |
| IPR006741 | 0 | 113 0 0 | 0 0 | 0 0 | 0 0 | 0 0 | 0 0 | 15.44 |
| IPR006757 | 0 | 31 0 0  | 0 0 | 0 0 | 11  | 0 0 | 0 0 | 32.45 |
| IPR006760 | 0 | 114 0 0 | 0 0 | 0 0 | 0 0 | 0 0 | 0 0 | 26.6  |
| IPR006764 | 0 | 184 0 0 | 0 0 | 0 0 | 0 0 | 0 0 | 0 0 | 37.21 |
| IPR006765 | 0 | 16 0 0  | 0 0 | 0 0 | 0 0 | 0 0 | 0 0 | 43.81 |
| IPR006774 | 0 | 3 0 0   | 0 0 | 0 0 | 0 0 | 0 0 | 0 0 | 61.34 |
| IPR006780 | 0 | 71 0 0  | 0 0 | 0 0 | 0 0 | 0 0 | 0 0 | 48.77 |
| IPR006783 | 0 | 54 0 0  | 0 0 | 0 0 | 0 0 | 0 0 | 0 0 | 43.41 |
| IPR006788 | 0 | 66 0 0  | 0 0 | 0 0 | 0 0 | 0 0 | 0 0 | 22.87 |
| IPR006789 | 0 | 100 0 0 | 0 0 | 0 0 | 0 0 | 0 0 | 0 0 | 35.78 |
| IPR006800 | 0 | 40 0 0  | 0 0 | 0 0 | 0 0 | 0 0 | 0 0 | 63.19 |
| IPR006811 | 0 | 81 0 0  | 0 0 | 0 0 | 0 0 | 0 0 | 0 0 | 49.49 |
| IPR006812 | 0 | 32 0 0  | 0 0 | 0 0 | 0 0 | 0 0 | 0 0 | 42.47 |
| IPR006813 | 0 | 79 0 0  | 0 0 | 0 0 | 0 0 | 0 0 | 0 0 | 20.42 |
| IPR006817 | 0 | 110 0 0 | 0 0 | 0 0 | 0 0 | 0 0 | 0 0 | 94.14 |
| IPR006818 | 0 | 100 0 0 | 0 0 | 0 0 | 0 0 | 0 0 | 0 0 | 59.81 |
| IPR006829 | 0 | 92 2 2  | 0 0 | 0 0 | 0 0 | 0 0 | 0 0 | 13.79 |
| IPR006830 | 0 | 15 0 0  | 0 0 | 0 0 | 0 0 | 0 0 | 0 0 | 69.26 |
| IPR006833 | 0 | 8 0 0   | 0 0 | 0 0 | 0 0 | 0 0 | 0 0 | 43.09 |
| IPR006875 | 0 | 78 0 0  | 0 0 | 0 0 | 0 0 | 0 0 | 0 0 | 31.23 |
| IPR006885 | 0 | 170 0 0 | 0 0 | 0 0 | 0 0 | 0 0 | 0 0 | 36.89 |
| IPR006891 | 0 | 20 0 0  | 0 0 | 0 0 | 0 0 | 0 0 | 0 0 | 76.35 |
|           |   |         |     |     |     |     |     |       |

|           |   |         |     |     |     |     |     |       |
|-----------|---|---------|-----|-----|-----|-----|-----|-------|
| IPR006940 | 0 | 22 0 0  | 0 0 | 0 0 | 0 0 | 0 0 | 0 0 | 37.64 |
| IPR006942 | 0 | 40 0 0  | 0 0 | 0 0 | 0 0 | 0 0 | 0 0 | 43.45 |
| IPR006952 | 0 | 20 0 0  | 0 0 | 0 0 | 0 0 | 0 0 | 0 0 | 79.47 |
| IPR006958 | 0 | 76 0 0  | 0 0 | 0 0 | 0 0 | 0 0 | 0 0 | 52.78 |
| IPR006959 | 0 | 32 0 0  | 0 0 | 0 0 | 0 0 | 0 0 | 0 0 | 62.46 |
| IPR006961 | 0 | 3 0 0   | 0 0 | 0 0 | 0 0 | 0 0 | 0 0 | 55.36 |
| IPR006967 | 0 | 222 0 0 | 0 0 | 0 0 | 0 0 | 0 0 | 0 0 | 7.93  |
| IPR006980 | 0 | 11 0 0  | 0 0 | 0 0 | 0 0 | 0 0 | 0 0 | 48.33 |
| IPR006990 | 0 | 56 0 0  | 0 0 | 0 0 | 0 0 | 0 0 | 0 0 | 29.62 |
| IPR007005 | 0 | 66 0 0  | 0 0 | 0 0 | 0 0 | 0 0 | 0 0 | 45.51 |
| IPR007007 | 0 | 92 0 0  | 0 0 | 0 0 | 0 0 | 0 0 | 0 0 | 33.86 |
| IPR007011 | 0 | 111 0 0 | 0 0 | 0 0 | 0 0 | 0 0 | 0 0 | 30.23 |
| IPR007019 | 0 | 80 0 0  | 0 0 | 0 0 | 0 0 | 0 0 | 0 0 | 26.77 |
| IPR007023 | 0 | 93 0 0  | 0 0 | 0 0 | 0 0 | 0 0 | 0 0 | 32.86 |
| IPR007035 | 0 | 101 0 0 | 0 0 | 0 0 | 0 0 | 0 0 | 0 0 | 30.7  |
| IPR007039 | 0 | 344 0 0 | 0 0 | 0 0 | 0 0 | 0 0 | 0 0 | 11    |
| IPR007040 | 0 | 93 0 0  | 0 0 | 0 0 | 0 0 | 0 0 | 0 0 | 61.96 |
| IPR007041 | 0 | 215 0 0 | 0 0 | 0 0 | 0 0 | 0 0 | 0 0 | 41.71 |
| IPR007047 | 0 | 324 0 0 | 0 0 | 0 0 | 0 0 | 0 0 | 0 0 | 36.91 |
| IPR007054 | 0 | 78 0 0  | 0 0 | 0 0 | 0 0 | 0 0 | 0 0 | 83.17 |
| IPR007078 | 0 | 213 0 0 | 0 0 | 0 0 | 0 0 | 0 0 | 0 0 | 21.06 |
| IPR007079 | 0 | 145 0 0 | 0 0 | 0 0 | 0 0 | 0 0 | 0 0 | 61.02 |
| IPR007082 | 0 | 271 0 0 | 0 0 | 0 0 | 0 0 | 0 0 | 0 0 | 18.53 |
| IPR007140 | 0 | 436 0 0 | 0 0 | 0 0 | 0 0 | 0 0 | 0 0 | 13.62 |
| IPR007143 | 0 | 82 0 0  | 0 0 | 0 0 | 0 0 | 0 0 | 0 0 | 42.77 |
| IPR007144 | 0 | 84 0 0  | 0 0 | 0 0 | 0 0 | 0 0 | 0 0 | 31.52 |
| IPR007149 | 0 | 92 0 0  | 0 0 | 0 0 | 0 0 | 0 0 | 0 0 | 23.14 |
| IPR007153 | 0 | 90 0 0  | 0 0 | 0 0 | 0 0 | 0 0 | 0 0 | 61.06 |
| IPR007158 | 0 | 47 0 0  | 0 0 | 0 0 | 0 0 | 0 0 | 0 0 | 27.59 |
| IPR007162 | 0 | 19 0 0  | 0 0 | 0 0 | 0 0 | 0 0 | 0 0 | 41.15 |
| IPR007163 | 0 | 191 0 0 | 0 0 | 0 0 | 0 0 | 0 0 | 0 0 | 28.37 |
| IPR007169 | 0 | 128 0 0 | 0 0 | 0 0 | 0 0 | 0 0 | 0 0 | 67.46 |
| IPR007170 | 0 | 130 0 0 | 0 0 | 0 0 | 0 0 | 0 0 | 0 0 | 59.53 |
| IPR007171 | 0 | 43 0 0  | 0 0 | 0 0 | 0 0 | 0 0 | 0 0 | 32.95 |
| IPR007184 | 0 | 176 0 0 | 0 0 | 0 0 | 0 0 | 0 0 | 0 0 | 22.11 |
| IPR007204 | 0 | 99 0 0  | 0 0 | 0 0 | 0 0 | 0 0 | 0 0 | 50.34 |
| IPR007211 | 0 | 127 0 0 | 0 0 | 0 0 | 0 0 | 0 0 | 0 0 | 45.61 |
| IPR007215 | 0 | 165 0 0 | 0 0 | 0 0 | 0 0 | 0 0 | 0 0 | 29.82 |
| IPR007217 | 0 | 80 0 0  | 0 0 | 0 0 | 0 0 | 0 0 | 0 0 | 35.33 |
| IPR007227 | 0 | 426 0 0 | 0 0 | 0 0 | 0 0 | 0 0 | 0 0 | 9.84  |
| IPR007229 | 0 | 18 0 0  | 0 0 | 0 0 | 0 0 | 0 0 | 0 0 | 28.09 |
| IPR007236 | 0 | 261 0 0 | 0 0 | 0 0 | 0 0 | 0 0 | 0 0 | 29.63 |
| IPR007242 | 0 | 71 0 0  | 0 0 | 0 0 | 0 0 | 0 0 | 0 0 | 37.3  |
| IPR007251 | 0 | 117 0 0 | 0 0 | 0 0 | 0 0 | 0 0 | 0 0 | 32.91 |
| IPR007252 | 0 | 112 0 0 | 0 0 | 0 0 | 0 0 | 0 0 | 0 0 | 18.41 |
| IPR007254 | 0 | 48 0 0  | 0 0 | 0 0 | 0 0 | 0 0 | 0 0 | 25.34 |
| IPR007262 | 0 | 105 0 0 | 0 0 | 0 0 | 0 0 | 0 0 | 0 0 | 33.86 |
| IPR007264 | 0 | 110 0 0 | 0 0 | 0 0 | 0 0 | 0 0 | 0 0 | 48.72 |
| IPR007277 | 0 | 65 0 0  | 0 0 | 0 0 | 0 0 | 0 0 | 0 0 | 39.88 |
| IPR007278 | 0 | 223 0 0 | 0 0 | 0 0 | 0 0 | 0 0 | 0 0 | 36.94 |
| IPR007285 | 0 | 39 0 0  | 0 0 | 0 0 | 0 0 | 0 0 | 0 0 | 11.13 |
| IPR007290 | 0 | 74 0 0  | 0 0 | 0 0 | 0 0 | 0 0 | 0 0 | 24.14 |
| IPR007292 | 0 | 22 0 0  | 0 0 | 0 0 | 0 0 | 0 0 | 0 0 | 24.4  |
| IPR007294 | 0 | 32 0 0  | 0 0 | 0 0 | 0 0 | 0 0 | 0 0 | 22.66 |
| IPR007304 | 0 | 82 0 0  | 0 0 | 0 0 | 0 0 | 0 0 | 0 0 | 24.03 |
| IPR007305 | 0 | 108 0 0 | 0 0 | 0 0 | 0 0 | 0 0 | 0 0 | 36.79 |
| IPR007306 | 0 | 42 0 0  | 0 0 | 0 0 | 0 0 | 0 0 | 0 0 | 37.02 |
| IPR007318 | 0 | 60 0 0  | 0 0 | 0 0 | 0 0 | 0 0 | 0 0 | 36.8  |
| IPR007326 | 0 | 5 2 2   | 0 0 | 0 0 | 0 0 | 0 0 | 0 0 | 29.11 |
| IPR007327 | 0 | 82 0 0  | 0 0 | 0 0 | 0 0 | 0 0 | 1 1 | 43.46 |
| IPR007334 | 0 | 109 0 0 | 0 0 | 0 0 | 0 0 | 0 0 | 0 0 | 55.22 |
| IPR007336 | 0 | 109 0 0 | 0 0 | 0 0 | 0 0 | 0 0 | 0 0 | 44.34 |
| IPR007337 | 0 | 267 0 0 | 0 0 | 0 0 | 0 0 | 0 0 | 0 0 | 21.54 |
| IPR007339 | 0 | 111 0 0 | 0 0 | 0 0 | 0 0 | 0 0 | 0 0 | 37.73 |
| IPR007343 | 0 | 344 0 0 | 0 0 | 0 0 | 0 0 | 0 0 | 0 0 | 32.27 |
| IPR007347 | 0 | 139 0 0 | 0 0 | 0 0 | 0 0 | 0 0 | 0 0 | 67.62 |
| IPR007352 | 0 | 105 0 0 | 0 0 | 0 0 | 0 0 | 0 0 | 0 0 | 33.96 |
| IPR007355 | 0 | 32 0 0  | 0 0 | 0 0 | 0 0 | 0 0 | 0 0 | 33.97 |
| IPR007358 | 0 | 169 0 0 | 0 0 | 0 0 | 0 0 | 0 0 | 0 0 | 39.01 |
| IPR007364 | 0 | 37 0 0  | 0 0 | 0 0 | 0 0 | 0 0 | 0 0 | 44.3  |
| IPR007375 | 0 | 132 0 0 | 0 0 | 0 0 | 0 0 | 0 0 | 0 0 | 22.6  |
| IPR007376 | 0 | 82 0 0  | 0 0 | 0 0 | 0 0 | 0 0 | 0 0 | 68.93 |
| IPR007382 | 0 | 144 0 0 | 0 0 | 0 0 | 0 0 | 0 0 | 0 0 | 50.74 |
| IPR007384 | 0 | 140 0 0 | 0 0 | 0 0 | 0 0 | 0 0 | 0 0 | 37.72 |
| IPR007385 | 0 | 92 0 0  | 0 0 | 0 0 | 0 0 | 0 0 | 0 0 | 74.66 |
| IPR007386 | 0 | 57 0 0  | 0 0 | 0 0 | 0 0 | 0 0 | 0 0 | 18.09 |
| IPR007390 | 0 | 294 0 0 | 0 0 | 0 0 | 0 0 | 0 0 | 0 0 | 36.48 |
| IPR007395 | 0 | 169 0 0 | 0 0 | 0 0 | 0 0 | 0 0 | 0 0 | 39.37 |
| IPR007405 | 0 | 49 0 0  | 0 0 | 0 0 | 0 0 | 0 0 | 0 0 | 36.13 |
| IPR007412 | 0 | 352 0 0 | 0 0 | 0 0 | 0 0 | 0 0 | 0 0 | 18.44 |
| IPR007413 | 0 | 164 0 0 | 0 0 | 0 0 | 0 0 | 0 0 | 0 0 | 48.19 |
| IPR007416 | 0 | 144 0 0 | 0 0 | 0 0 | 0 0 | 0 0 | 0 0 | 48.64 |
| IPR007417 | 0 | 16 0 0  | 0 0 | 0 0 | 0 0 | 0 0 | 0 0 | 30.93 |
| IPR007422 | 0 | 157 0 0 | 0 0 | 0 0 | 0 0 | 0 0 | 0 0 | 27.73 |
| IPR007423 | 0 | 228 0 0 | 0 0 | 0 0 | 0 0 | 0 0 | 0 0 | 48.21 |
| IPR007427 | 0 | 108 0 0 | 0 0 | 0 0 | 0 0 | 0 0 | 0 0 | 47.6  |
| IPR007428 | 0 | 370 0 0 | 0 0 | 0 0 | 0 0 | 0 0 | 0 0 | 32.81 |
| IPR007430 | 0 | 228 0 0 | 0 0 | 0 0 | 0 0 | 0 0 | 0 0 | 11.43 |
| IPR007437 | 0 | 144 0 0 | 0 0 | 0 0 | 0 0 | 0 0 | 0 0 | 55.96 |
| IPR007440 | 0 | 220 0 0 | 0 0 | 0 0 | 0 0 | 0 0 | 0 0 | 23.51 |
| IPR007441 | 0 | 76 0 0  | 0 0 | 0 0 | 0 0 | 0 0 | 0 0 | 59.55 |
| IPR007444 | 0 | 283 0 0 | 0 0 | 0 0 | 0 0 | 0 0 | 0 0 | 36.66 |
| IPR007448 | 0 | 116 0 0 | 0 0 | 0 0 | 0 0 | 0 0 | 0 0 | 44.23 |
| IPR007451 | 0 | 166 0 0 | 0 0 | 0 0 | 0 0 | 0 0 | 0 0 | 44.64 |
| IPR007453 | 0 | 235 0 0 | 0 0 | 0 0 | 0 0 | 0 0 | 0 0 | 41.33 |
| IPR007456 | 0 | 154 0 0 | 0 0 | 0 0 | 0 0 | 0 0 | 0 0 | 45.61 |
| IPR007457 | 0 | 266 0 0 | 0 0 | 0 0 | 0 0 | 0 0 | 0 0 | 49.03 |
| IPR007458 | 0 | 93 0 0  | 0 0 | 0 0 | 0 0 | 0 0 | 0 0 | 77.61 |
| IPR007459 | 0 | 321 0 0 | 0 0 | 0 0 | 0 0 | 0 0 | 0 0 | 20.74 |
| IPR007460 | 0 | 235 0 0 | 0 0 | 0 0 | 0 0 | 0 0 | 0 0 | 22.85 |
| IPR007463 | 0 | 64 0 0  | 0 0 | 0 0 | 0 0 | 0 0 | 0 0 | 24.92 |
| IPR007473 | 0 | 291 0 0 | 0 0 | 0 0 | 0 0 | 0 0 | 0 0 | 34.63 |
| IPR007479 | 0 | 202 0 0 | 0 0 | 0 0 | 0 0 | 0 0 | 0 0 | 56.86 |
| IPR007485 | 0 | 250 0 0 | 0 0 | 0 0 | 0 0 | 0 0 | 0 0 | 17.92 |
| IPR007497 | 0 | 579 0 0 | 0 0 | 0 0 | 0 0 | 0 0 | 0 0 | 11.74 |
| IPR007501 | 0 | 7 0 0   | 0 0 | 0 0 | 0 0 | 0 0 | 0 0 | 55.52 |
| IPR007503 | 0 | 11 0 0  | 0 0 | 0 0 | 0 0 | 0 0 | 0 0 | 32.8  |
| IPR007530 | 0 | 52 0 0  | 0 0 | 0 0 | 0 0 | 0 0 | 0 0 | 38.05 |
| IPR007531 | 0 | 38 0 0  | 0 0 | 0 0 | 0 0 | 0 0 | 0 0 | 31.08 |
| IPR007536 | 0 | 242 0 0 | 0 0 | 0 0 | 0 0 | 0 0 | 0 0 | 28.67 |
| IPR007546 | 0 | 178 0 0 | 0 0 | 0 0 | 0 0 | 0 0 | 0 0 | 25.97 |
| IPR007548 | 0 | 12 0 0  | 0 0 | 0 0 | 0 0 | 0 0 | 0 0 | 28.04 |
| IPR007551 | 0 | 413 0 0 | 0 0 | 0 0 | 0 0 | 0 0 | 0 0 | 43.98 |
| IPR007563 | 0 | 188 0 0 | 0 0 | 0 0 | 0 0 | 0 0 | 0 0 | 33.3  |
| IPR007564 | 0 | 30 0 0  | 0 0 | 0 0 | 0 0 | 0 0 | 0 0 | 53.76 |
| IPR007570 | 0 | 42 0 0  | 0 0 | 0 0 | 0 0 | 0 0 | 0 0 | 61.84 |
| IPR007576 | 0 | 25 0 0  | 0 0 | 0 0 | 0 0 | 0 0 | 0 0 | 36.58 |
| IPR007587 | 0 | 125 0 0 | 0 0 | 0 0 | 0 0 | 0 0 | 0 0 | 27.09 |
| IPR007595 | 0 | 213 0 0 | 0 0 | 0 0 | 0 0 | 0 0 | 0 0 | 56.91 |
| IPR007633 | 0 | 21 0 0  | 0 0 | 0 0 | 0 0 | 0 0 | 0 0 | 53.07 |
| IPR007659 | 0 | 9 0 0   | 0 0 | 0 0 | 0 0 | 0 0 | 0 0 | 74.61 |
| IPR007673 | 0 | 49 0 0  | 0 0 | 0 0 | 0 0 | 0 0 | 0 0 | 33.05 |
| IPR007677 | 0 | 45 0 0  | 0 0 | 0 0 | 0 0 | 0 0 | 0 0 | 20.27 |
| IPR007680 | 0 | 77 0 0  | 0 0 | 0 0 | 0 0 | 0 0 | 0 0 | 42.56 |
| IPR007682 | 0 | 8 0 0   | 0 0 | 0 0 | 0 0 | 0 0 | 0 0 | 73.24 |
| IPR007686 | 0 | 431 0 0 | 0 0 | 0 0 | 0 0 | 0 0 | 0 0 | 22.52 |
| IPR007687 | 0 | 18 0 0  | 0 0 | 0 0 | 0 0 | 0 0 | 0 0 | 58.99 |
| IPR007702 | 0 | 77 0 0  | 0 0 | 0 0 | 0 0 | 0 0 | 0 0 | 39.77 |
| IPR007715 | 0 | 142 0 0 | 0 0 | 0 0 | 0 0 | 0 0 | 0 0 | 20.22 |
| IPR007721 | 0 | 355 0 0 | 0 0 | 0 0 | 0 0 | 0 0 | 0 0 | 27.98 |
| IPR007729 | 0 | 152 0 0 | 0 0 | 0 0 | 0 0 | 0 0 | 0 0 | 34.88 |
| IPR007731 | 0 | 26 0 0  | 0 0 | 0 0 | 0 0 | 0 0 | 0 0 | 15.55 |
| IPR007732 | 0 | 15 0 0  | 0 0 | 0 0 | 0 0 | 0 0 | 0 0 | 71.98 |
| IPR007733 | 0 | 30 0 0  | 0 0 | 0 0 | 0 0 | 0 0 | 0 0 | 35.17 |
| IPR007736 | 0 | 75 0 0  | 0 0 | 0 0 | 0 0 | 0 0 | 0 0 | 42.43 |
| IPR007738 | 0 | 42 0 0  | 0 0 | 0 0 | 0 0 | 0 0 | 0 0 | 36.94 |
| IPR007746 | 0 | 23 0 0  | 0 0 | 0 0 | 0 0 | 0 0 | 0 0 | 70.08 |
| IPR007747 | 0 | 42 0 0  | 0 0 | 0 0 | 0 0 | 0 0 | 0 0 | 53.74 |
| IPR007752 | 0 | 180 0 0 | 0 0 | 0 0 | 0 0 | 0 0 | 0 0 | 93.37 |
| IPR007754 | 0 | 53 0 0  | 0 0 | 0 0 | 0 0 | 0 0 | 0 0 | 45.16 |
| IPR007761 | 0 | 109 0 0 | 0 0 | 0 0 | 0 0 | 0 0 | 0 0 | 46.09 |
| IPR007777 | 0 | 13 0 0  | 0 0 | 0 0 | 0 0 | 0 0 | 0 0 | 38.5  |
| IPR007783 | 0 | 90 0 0  | 0 0 | 1 1 | 0 0 | 0 0 | 0 0 | 49.07 |
| IPR007785 | 0 | 81 0 0  | 0 0 | 0 0 | 0 0 | 0 0 | 0 0 | 31.11 |
| IPR007788 | 0 | 88 0 0  | 0 0 | 0 0 | 0 0 | 0 0 | 0 0 | 32.39 |
| IPR007795 | 0 | 102 0 0 | 0 0 | 0 0 | 0 0 | 0 0 | 0 0 |       |

|           |   |         |     |     |     |     |     |       |
|-----------|---|---------|-----|-----|-----|-----|-----|-------|
| IPRO07800 | 0 | 12 0 0  | 0 0 | 0 0 | 0 0 | 0 0 | 0 0 | 57.8  |
| IPRO07801 | 0 | 216 0 0 | 0 0 | 0 0 | 0 0 | 0 0 | 0 0 | 32.32 |
| IPRO07808 | 0 | 109 0 0 | 0 0 | 0 0 | 0 0 | 0 0 | 0 0 | 39.18 |
| IPRO07820 | 0 | 232 0 0 | 0 0 | 0 0 | 0 0 | 0 0 | 0 0 | 16.55 |
| IPRO07825 | 0 | 29 0 0  | 0 0 | 0 0 | 0 0 | 0 0 | 0 0 | 36.16 |
| IPRO07828 | 0 | 91 0 0  | 0 0 | 0 0 | 0 0 | 0 0 | 0 0 | 48.54 |
| IPRO07837 | 0 | 374 0 0 | 0 0 | 0 0 | 0 0 | 0 0 | 0 0 | 5.23  |
| IPRO07839 | 0 | 32 0 0  | 0 0 | 0 0 | 0 0 | 0 0 | 0 0 | 28.39 |
| IPRO07841 | 0 | 152 0 0 | 0 0 | 0 0 | 0 0 | 0 0 | 0 0 | 49.49 |
| IPRO07845 | 0 | 106 0 0 | 0 0 | 0 0 | 0 0 | 0 0 | 0 0 | 37.48 |
| IPRO07852 | 0 | 87 0 0  | 0 0 | 0 0 | 0 0 | 0 0 | 0 0 | 27.33 |
| IPRO07876 | 0 | 34 0 0  | 0 0 | 0 0 | 0 0 | 0 0 | 0 0 | 44.95 |
| IPRO07882 | 0 | 13 0 0  | 0 0 | 0 0 | 0 0 | 0 0 | 0 0 | 25.61 |
| IPRO07884 | 0 | 34 0 0  | 0 0 | 0 0 | 0 0 | 0 0 | 0 0 | 40.43 |
| IPRO07893 | 0 | 319 0 0 | 0 0 | 0 0 | 0 0 | 0 0 | 0 0 | 23.52 |
| IPRO07896 | 0 | 381 0 0 | 0 0 | 0 0 | 0 0 | 0 0 | 0 0 | 23.63 |
| IPRO07902 | 0 | 37 0 0  | 0 0 | 0 0 | 0 0 | 0 0 | 0 0 | 24.46 |
| IPRO07910 | 0 | 11 0 0  | 0 0 | 0 0 | 0 0 | 0 0 | 0 0 | 55.69 |
| IPRO07911 | 0 | 134 0 0 | 0 0 | 0 0 | 0 0 | 0 0 | 0 0 | 49.06 |
| IPRO07914 | 0 | 28 0 0  | 0 0 | 0 0 | 0 0 | 0 0 | 0 0 | 41.29 |
| IPRO07918 | 0 | 54 0 0  | 0 0 | 0 0 | 0 0 | 0 0 | 0 0 | 45.74 |
| IPRO07919 | 0 | 97 0 0  | 0 0 | 0 0 | 0 0 | 0 0 | 0 0 | 30.08 |
| IPRO07920 | 0 | 90 0 0  | 0 0 | 0 0 | 0 0 | 0 0 | 0 0 | 51.63 |
| IPRO07925 | 0 | 13 0 0  | 0 0 | 0 0 | 0 0 | 0 0 | 0 0 | 49.75 |
| IPRO07927 | 0 | 11 0 0  | 0 0 | 0 0 | 0 0 | 0 0 | 0 0 | 29.44 |
| IPRO07933 | 0 | 41 0 0  | 0 0 | 0 0 | 0 0 | 0 0 | 0 0 | 29.67 |
| IPRO07940 | 0 | 64 0 0  | 0 0 | 0 0 | 0 0 | 0 0 | 0 0 | 42.21 |
| IPRO07944 | 0 | 139 0 0 | 0 0 | 0 0 | 0 0 | 0 0 | 0 0 | 52.8  |
| IPRO07945 | 0 | 30 0 0  | 0 0 | 0 0 | 0 0 | 0 0 | 0 0 | 42.69 |
| IPRO07947 | 0 | 38 0 0  | 0 0 | 0 0 | 0 0 | 0 0 | 0 0 | 35.91 |
| IPRO07951 | 0 | 27 0 0  | 0 0 | 0 0 | 0 0 | 0 0 | 0 0 | 26.97 |
| IPRO07960 | 0 | 149 0 0 | 0 0 | 0 0 | 0 0 | 0 0 | 0 0 | 21.43 |
| IPRO07970 | 0 | 113 0 0 | 0 0 | 0 0 | 0 0 | 0 0 | 0 0 | 31.71 |
| IPRO07979 | 0 | 19 0 0  | 0 0 | 0 0 | 0 0 | 0 0 | 0 0 | 78.43 |
| IPRO07985 | 0 | 150 0 0 | 0 0 | 0 0 | 0 0 | 0 0 | 0 0 | 60.8  |
| IPRO07986 | 0 | 8 0 0   | 0 0 | 0 0 | 0 0 | 0 0 | 0 0 | 94.1  |
| IPRO08001 | 0 | 23 0 0  | 0 0 | 0 0 | 0 0 | 0 0 | 0 0 | 36.78 |
| IPRO08003 | 0 | 6 0 0   | 0 0 | 0 0 | 0 0 | 0 0 | 0 0 | 52.78 |
| IPRO08004 | 0 | 59 0 0  | 0 0 | 0 0 | 0 0 | 0 0 | 0 0 | 22.24 |
| IPRO08014 | 0 | 10 0 0  | 0 0 | 0 0 | 0 0 | 0 0 | 0 0 | 54.8  |
| IPRO08015 | 0 | 73 0 0  | 0 0 | 0 0 | 0 0 | 0 0 | 0 0 | 43.6  |
| IPRO08018 | 0 | 37 0 0  | 0 0 | 0 0 | 0 0 | 0 0 | 0 0 | 72.85 |
| IPRO08020 | 0 | 4 0 0   | 0 0 | 0 0 | 0 0 | 0 0 | 0 0 | 68.08 |
| IPRO08022 | 0 | 28 0 0  | 0 0 | 0 0 | 0 0 | 0 0 | 0 0 | 70.28 |
| IPRO08024 | 0 | 262 0 0 | 0 0 | 0 0 | 0 0 | 0 0 | 0 0 | 27.4  |
| IPRO08027 | 0 | 59 0 0  | 0 0 | 0 0 | 0 0 | 0 0 | 0 0 | 40.38 |
| IPRO08028 | 0 | 4 0 0   | 0 0 | 0 0 | 0 0 | 0 0 | 0 0 | 84.2  |
| IPRO08031 | 0 | 6 0 0   | 0 0 | 0 0 | 0 0 | 0 0 | 0 0 | 57.88 |
| IPRO08032 | 0 | 8 0 0   | 0 0 | 0 0 | 0 0 | 0 0 | 0 0 | 46.32 |
| IPRO08034 | 0 | 14 0 0  | 0 0 | 0 0 | 0 0 | 0 0 | 0 0 | 96.28 |
| IPRO08055 | 0 | 7 0 0   | 0 0 | 0 0 | 0 0 | 0 0 | 0 0 | 81.25 |
| IPRO08108 | 0 | 16 0 0  | 0 0 | 0 0 | 0 0 | 0 0 | 0 0 | 64.28 |
| IPRO08116 | 0 | 4 0 0   | 0 0 | 0 0 | 0 0 | 0 0 | 0 0 | 95.81 |
| IPRO08185 | 0 | 55 0 0  | 0 0 | 0 0 | 0 0 | 0 0 | 0 0 | 42.28 |
| IPRO08200 | 0 | 6 0 0   | 0 0 | 0 0 | 0 0 | 0 0 | 0 0 | 65.7  |
| IPRO08203 | 0 | 20 0 0  | 0 0 | 0 0 | 0 0 | 0 0 | 0 0 | 20.56 |
| IPRO08205 | 0 | 113 0 0 | 0 0 | 0 0 | 0 0 | 0 0 | 0 0 | 32.37 |
| IPRO08218 | 0 | 205 0 0 | 0 0 | 0 0 | 0 0 | 0 0 | 0 0 | 22.85 |
| IPRO08226 | 0 | 32 0 0  | 0 0 | 0 0 | 0 0 | 0 0 | 0 0 | 34.73 |
| IPRO08238 | 0 | 21 0 0  | 0 0 | 0 0 | 0 0 | 0 0 | 0 0 | 44.42 |
| IPRO08243 | 0 | 114 0 0 | 0 0 | 0 0 | 0 0 | 0 0 | 0 0 | 42.07 |
| IPRO08249 | 0 | 111 0 0 | 0 0 | 0 0 | 0 0 | 0 0 | 0 0 | 50.42 |
| IPRO08303 | 0 | 17 0 0  | 0 0 | 0 0 | 0 0 | 0 0 | 0 0 | 57.92 |
| IPRO08304 | 0 | 14 0 0  | 0 0 | 0 0 | 0 0 | 0 0 | 0 0 | 46.08 |
| IPRO08306 | 0 | 3 0 0   | 0 0 | 0 0 | 0 0 | 0 0 | 0 0 | 29.73 |
| IPRO08308 | 0 | 47 0 0  | 0 0 | 0 0 | 0 0 | 0 0 | 0 0 | 34.07 |
| IPRO08310 | 0 | 31 0 0  | 0 0 | 0 0 | 0 0 | 0 0 | 0 0 | 49.99 |
| IPRO08316 | 0 | 54 0 0  | 0 0 | 0 0 | 0 0 | 0 0 | 0 0 | 33.98 |
| IPRO08317 | 0 | 9 0 0   | 0 0 | 0 0 | 0 0 | 0 0 | 0 0 | 30.52 |
| IPRO08320 | 0 | 63 0 0  | 0 0 | 0 0 | 0 0 | 0 0 | 0 0 | 48.13 |
| IPRO08321 | 0 | 67 0 0  | 0 0 | 0 0 | 0 0 | 0 0 | 0 0 | 57.36 |
| IPRO08323 | 0 | 154 0 0 | 0 0 | 0 0 | 0 0 | 0 0 | 0 0 | 25.42 |
| IPRO08386 | 0 | 72 0 0  | 0 0 | 0 0 | 0 0 | 0 0 | 0 0 | 29.5  |
| IPRO08387 | 0 | 45 0 0  | 0 0 | 0 0 | 0 0 | 0 0 | 0 0 | 45.33 |
| IPRO08389 | 0 | 110 0 0 | 0 0 | 0 0 | 0 0 | 0 0 | 0 0 | 40.74 |
| IPRO08392 | 0 | 11 0 0  | 0 0 | 0 0 | 0 0 | 0 0 | 0 0 | 70.57 |
| IPRO08394 | 0 | 12 0 0  | 0 0 | 0 0 | 0 0 | 0 0 | 0 0 | 56.41 |
| IPRO08401 | 0 | 48 0 0  | 0 0 | 0 0 | 0 0 | 0 0 | 0 0 | 31.81 |
| IPRO08403 | 0 | 7 0 0   | 0 0 | 0 0 | 0 0 | 0 0 | 0 0 | 70.95 |
| IPRO08406 | 0 | 40 0 0  | 0 0 | 0 0 | 0 0 | 0 0 | 0 0 | 37    |
| IPRO08408 | 0 | 10 0 0  | 0 0 | 0 0 | 0 0 | 0 0 | 0 0 | 64.52 |
| IPRO08409 | 0 | 73 0 0  | 0 0 | 0 0 | 0 0 | 0 0 | 0 0 | 33.65 |
| IPRO08412 | 0 | 7 0 0   | 0 0 | 0 0 | 0 0 | 0 0 | 0 0 | 67.47 |
| IPRO08420 | 0 | 15 0 0  | 0 0 | 0 0 | 0 0 | 0 0 | 0 0 | 44.61 |
| IPRO08426 | 0 | 29 0 0  | 0 0 | 0 0 | 0 0 | 0 0 | 0 0 | 28.71 |
| IPRO08431 | 0 | 12 0 0  | 0 0 | 0 0 | 0 0 | 0 0 | 0 0 | 71.66 |
| IPRO08433 | 0 | 15 0 0  | 0 0 | 0 0 | 0 0 | 0 0 | 0 0 | 62.26 |
| IPRO08435 | 0 | 26 0 0  | 0 0 | 0 0 | 0 0 | 0 0 | 0 0 | 47.31 |
| IPRO08438 | 0 | 26 0 0  | 0 0 | 0 0 | 0 0 | 0 0 | 0 0 | 36.92 |
| IPRO08439 | 0 | 21 0 0  | 0 0 | 0 0 | 0 0 | 0 0 | 0 0 | 33.36 |
| IPRO08444 | 0 | 5 0 0   | 0 0 | 0 0 | 0 0 | 0 0 | 0 0 | 84.81 |
| IPRO08450 | 0 | 12 0 0  | 0 0 | 0 0 | 0 0 | 0 0 | 0 0 | 68.97 |
| IPRO08463 | 0 | 135 0 0 | 0 0 | 0 0 | 0 0 | 0 0 | 0 0 | 46.68 |
| IPRO08466 | 0 | 17 0 0  | 0 0 | 0 0 | 0 0 | 0 0 | 0 0 | 41.18 |
| IPRO08469 | 0 | 14 0 0  | 0 0 | 0 0 | 0 0 | 0 0 | 0 0 | 52.87 |
| IPRO08470 | 0 | 47 0 0  | 0 0 | 0 0 | 0 0 | 0 0 | 0 0 | 40.2  |
| IPRO08472 | 0 | 352 0 0 | 0 0 | 0 0 | 0 0 | 0 0 | 0 0 | 24.28 |
| IPRO08473 | 0 | 32 0 0  | 0 0 | 0 0 | 0 0 | 0 0 | 0 0 | 27.48 |
| IPRO08478 | 0 | 8 0 0   | 0 0 | 0 0 | 0 0 | 0 0 | 0 0 | 51.75 |
| IPRO08479 | 0 | 59 0 0  | 0 0 | 0 0 | 0 0 | 0 0 | 0 0 | 31.92 |
| IPRO08480 | 0 | 85 0 0  | 0 0 | 0 0 | 0 0 | 0 0 | 0 0 | 15.94 |
| IPRO08481 | 0 | 11 0 0  | 0 0 | 0 0 | 0 0 | 0 0 | 0 0 | 45.56 |
| IPRO08483 | 0 | 12 0 0  | 0 0 | 0 0 | 0 0 | 0 0 | 0 0 | 42.79 |
| IPRO08485 | 0 | 32 0 0  | 0 0 | 0 0 | 0 0 | 0 0 | 0 0 | 57.75 |
| IPRO08489 | 0 | 35 0 0  | 0 0 | 0 0 | 0 0 | 0 0 | 0 0 | 27.9  |
| IPRO08495 | 0 | 12 0 0  | 0 0 | 0 0 | 0 0 | 0 0 | 0 0 | 53.8  |
| IPRO08499 | 0 | 7 0 0   | 0 0 | 0 0 | 0 0 | 0 0 | 0 0 | 45.56 |
| IPRO08505 | 0 | 12 0 0  | 0 0 | 0 0 | 0 0 | 0 0 | 0 0 | 56.63 |
| IPRO08506 | 0 | 75 0 0  | 0 0 | 0 0 | 0 0 | 0 0 | 0 0 | 23.75 |
| IPRO08508 | 0 | 47 0 0  | 0 0 | 0 0 | 0 0 | 0 0 | 0 0 | 28.34 |
| IPRO08510 | 0 | 13 0 0  | 0 0 | 0 0 | 0 0 | 0 0 | 0 0 | 54.21 |
| IPRO08513 | 0 | 164 0 0 | 0 0 | 0 0 | 0 0 | 0 0 | 0 0 | 31.87 |
| IPRO08515 | 0 | 63 0 0  | 0 0 | 0 0 | 0 0 | 0 0 | 0 0 | 48.55 |
| IPRO08516 | 0 | 49 0 0  | 0 0 | 0 0 | 0 0 | 0 0 | 0 0 | 51.29 |
| IPRO08518 | 0 | 35 0 0  | 0 0 | 0 0 | 0 0 | 0 0 | 0 0 | 32.5  |
| IPRO08520 | 0 | 96 0 0  | 0 0 | 0 0 | 0 0 | 0 0 | 0 0 | 30.48 |
| IPRO08524 | 0 | 7 0 0   | 0 0 | 0 0 | 0 0 | 0 0 | 0 0 | 39.51 |
| IPRO08526 | 0 | 235 0 0 | 0 0 | 11  | 0 0 | 0 0 | 0 0 | 48.46 |
| IPRO08529 | 0 | 50 0 0  | 0 0 | 0 0 | 0 0 | 0 0 | 0 0 | 43.11 |
| IPRO08530 | 0 | 44 0 0  | 0 0 | 0 0 | 0 0 | 0 0 | 0 0 | 25.12 |
| IPRO08536 | 0 | 11 1 1  | 0 0 | 0 0 | 0 0 | 0 0 | 0 0 | 21.37 |
| IPRO08544 | 0 | 19 0 0  | 0 0 | 0 0 | 0 0 | 0 0 | 0 0 | 77.39 |
| IPRO08560 | 0 | 67 0 0  | 0 0 | 0 0 | 0 0 | 0 0 | 0 0 | 35.56 |
| IPRO08561 | 0 | 5 0 0   | 0 0 | 0 0 | 0 0 | 0 0 | 0 0 | 63.45 |
| IPRO08576 | 0 | 86 0 0  | 0 0 | 0 0 | 0 0 | 0 0 | 0 0 | 37.44 |
| IPRO08577 | 0 | 5 0 0   | 0 0 | 0 0 | 0 0 | 0 0 | 0 0 | 48.37 |
| IPRO08581 | 0 | 33 0 0  | 0 0 | 0 0 | 0 0 | 0 0 | 0 0 | 17.82 |
| IPRO08589 | 0 | 153 0 0 | 0 0 | 0 0 | 0 0 | 0 0 | 0 0 | 31.09 |
| IPRO08603 | 0 | 71 0 0  | 0 0 | 0 0 | 0 0 | 0 0 | 0 0 | 27.87 |
| IPRO08605 | 0 | 15 0 0  | 0 0 | 0 0 | 0 0 | 0 0 | 0 0 | 50.18 |
| IPRO08606 | 0 | 43 0 0  | 0 0 | 0 0 | 0 0 | 0 0 | 0 0 | 48.1  |
| IPRO08608 | 0 | 7 0 0   | 0 0 | 0 0 | 0 0 | 0 0 | 0 0 | 61.73 |
| IPRO08617 | 0 | 82 0 0  | 0 0 | 0 0 | 0 0 | 0 0 | 0 0 | 39.97 |
| IPRO08622 | 0 | 110 0 0 | 0 0 | 0 0 | 0 0 | 0 0 | 0 0 | 25.08 |
| IPRO08628 | 0 | 83 0 0  | 0 0 | 0 0 | 0 0 | 0 0 | 0 0 | 51.34 |
| IPRO08633 | 0 | 7 0 0   | 0 0 | 0 0 | 0 0 | 0 0 | 0 0 | 22.29 |
| IPRO08634 | 0 | 24 0 0  | 0 0 | 0 0 | 0 0 | 0 0 | 0 0 | 25.91 |
| IPRO08653 | 0 | 21 0 0  | 0 0 | 0 0 | 0 0 | 0 0 | 0 0 | 31.18 |
| IPRO08655 | 0 | 10 0 0  | 0 0 | 0 0 | 0 0 | 0 0 | 0 0 | 81.39 |
| IPRO08661 | 0 | 36 0 0  | 0 0 | 0 0 | 0 0 | 0 0 | 0 0 | 41.82 |
| IPRO08662 | 0 | 15 0 0  | 0 0 | 0 0 | 0 0 | 0 0 | 0 0 | 39.23 |
| IPRO08674 | 0 | 11 0 0  | 0 0 | 0 0 | 0 0 | 0 0 | 0 0 | 53.05 |
| IPRO08677 | 0 | 20 0 0  | 0 0 | 0 0 | 0 0 | 0 0 | 0 0 | 35.94 |
| IPRO08681 | 0 | 137 0 0 | 0 0 | 0 0 | 0 0 | 0 0 | 0 0 | 27.12 |
| IPRO08686 | 0 | 11 0 0  | 0 0 | 0 0 | 0 0 | 0 0 | 0 0 | 39.63 |
| IPRO08690 | 0 | 17 0 0  | 0 0 | 0 0 | 0 0 | 0 0 | 0 0 | 35.43 |
| IPRO08693 | 0 | 141 0 0 | 0 0 | 0 0 | 0 0 | 0 0 | 0 0 | 28.53 |

|           |   |         |     |     |     |     |     |       |
|-----------|---|---------|-----|-----|-----|-----|-----|-------|
| IPR008708 | 0 | 20 0 0  | 0 0 | 0 0 | 0 0 | 0 0 | 0 0 | 37.38 |
| IPR008711 | 0 | 53 0 0  | 0 0 | 0 0 | 0 0 | 0 0 | 0 0 | 36.5  |
| IPR008712 | 0 | 15 0 0  | 0 0 | 0 0 | 0 0 | 0 0 | 0 0 | 64.76 |
| IPR008713 | 0 | 59 0 0  | 0 0 | 1 0 | 0 0 | 0 0 | 0 0 | 32.9  |
| IPR008716 | 0 | 5 0 0   | 0 0 | 0 0 | 0 0 | 0 0 | 0 0 | 31.21 |
| IPR008717 | 0 | 28 0 0  | 0 0 | 0 0 | 0 0 | 0 0 | 0 0 | 33.21 |
| IPR008721 | 0 | 58 0 0  | 0 0 | 0 0 | 0 0 | 0 0 | 0 0 | 18.89 |
| IPR008728 | 0 | 81 0 0  | 0 0 | 0 0 | 0 0 | 0 0 | 0 0 | 25.33 |
| IPR008729 | 0 | 31 0 0  | 0 0 | 0 0 | 0 0 | 0 0 | 0 0 | 43.95 |
| IPR008730 | 0 | 4 0 0   | 0 0 | 0 0 | 0 0 | 0 0 | 0 0 | 36.4  |
| IPR008735 | 0 | 8 0 0   | 0 0 | 0 0 | 0 0 | 0 0 | 0 0 | 46.33 |
| IPR008761 | 0 | 13 0 0  | 0 0 | 0 0 | 0 0 | 0 0 | 0 0 | 33.96 |
| IPR008764 | 0 | 60 0 0  | 0 0 | 0 0 | 0 0 | 0 0 | 0 0 | 47.89 |
| IPR008767 | 0 | 78 0 0  | 0 0 | 0 0 | 0 0 | 0 0 | 0 0 | 6.31  |
| IPR008772 | 0 | 128 0 0 | 0 0 | 0 0 | 0 0 | 0 0 | 0 0 | 34.07 |
| IPR008773 | 0 | 124 0 0 | 0 0 | 0 0 | 0 0 | 0 0 | 0 0 | 58.72 |
| IPR008783 | 0 | 9 0 0   | 0 0 | 0 0 | 0 0 | 0 0 | 0 0 | 35.95 |
| IPR008797 | 0 | 56 0 0  | 0 0 | 0 0 | 0 0 | 0 0 | 0 0 | 20.69 |
| IPR008798 | 0 | 6 0 0   | 0 0 | 0 0 | 0 0 | 0 0 | 0 0 | 54.59 |
| IPR008799 | 0 | 4 0 0   | 0 0 | 0 0 | 0 0 | 0 0 | 0 0 | 34.42 |
| IPR008800 | 0 | 7 0 0   | 0 0 | 0 0 | 0 0 | 0 0 | 0 0 | 61.23 |
| IPR008802 | 0 | 23 0 0  | 0 0 | 0 0 | 0 0 | 0 0 | 0 0 | 48.66 |
| IPR008805 | 0 | 39 0 0  | 0 0 | 0 0 | 0 0 | 0 0 | 0 0 | 30.97 |
| IPR008835 | 0 | 17 0 0  | 0 0 | 0 0 | 0 0 | 0 0 | 0 0 | 55.08 |
| IPR008836 | 0 | 17 0 0  | 0 0 | 0 0 | 0 0 | 0 0 | 1 1 | 58.85 |
| IPR008837 | 0 | 27 0 0  | 0 0 | 0 0 | 0 0 | 0 0 | 0 0 | 44.35 |
| IPR008840 | 0 | 62 0 0  | 0 0 | 0 0 | 0 0 | 0 0 | 0 0 | 23.72 |
| IPR008841 | 0 | 152 0 0 | 0 0 | 0 0 | 0 0 | 0 0 | 0 0 | 6.8   |
| IPR008846 | 0 | 37 0 0  | 0 0 | 0 0 | 0 0 | 0 0 | 0 0 | 52.35 |
| IPR008848 | 0 | 15 0 0  | 0 0 | 0 0 | 0 0 | 0 0 | 0 0 | 47.58 |
| IPR008849 | 0 | 44 0 0  | 0 0 | 0 0 | 0 0 | 0 0 | 0 0 | 36.84 |
| IPR008855 | 0 | 36 0 0  | 0 0 | 0 0 | 0 0 | 0 0 | 0 0 | 45.6  |
| IPR008861 | 0 | 131 0 0 | 0 0 | 0 0 | 0 0 | 0 0 | 0 0 | 33.9  |
| IPR008863 | 0 | 158 0 0 | 0 0 | 0 0 | 0 0 | 0 0 | 0 0 | 21.48 |
| IPR008865 | 0 | 78 0 0  | 0 0 | 0 0 | 0 0 | 0 0 | 0 0 | 48.8  |
| IPR008873 | 0 | 21 0 0  | 0 0 | 0 0 | 0 0 | 0 0 | 0 0 | 35.38 |
| IPR008874 | 0 | 42 0 0  | 0 0 | 0 0 | 0 0 | 0 0 | 0 0 | 46.65 |
| IPR008878 | 0 | 417 0 0 | 0 0 | 0 0 | 0 0 | 0 0 | 0 0 | 32.24 |
| IPR008886 | 0 | 354 0 0 | 0 0 | 0 0 | 0 0 | 0 0 | 0 0 | 20.44 |
| IPR008892 | 0 | 34 0 0  | 0 0 | 0 0 | 0 0 | 0 0 | 0 0 | 42.51 |
| IPR008898 | 0 | 14 0 0  | 0 0 | 0 0 | 0 0 | 0 0 | 0 0 | 39.06 |
| IPR008901 | 0 | 160 0 0 | 0 0 | 0 0 | 0 0 | 0 0 | 0 0 | 13.18 |
| IPR008903 | 0 | 5 0 0   | 0 0 | 0 0 | 0 0 | 0 0 | 0 0 | 97.68 |
| IPR008908 | 0 | 7 0 0   | 0 0 | 0 0 | 0 0 | 0 0 | 0 0 | 15.6  |
| IPR009040 | 0 | 12 0 0  | 0 0 | 0 0 | 0 0 | 0 0 | 0 0 | 46.83 |
| IPR009049 | 0 | 10 0 0  | 0 0 | 0 0 | 0 0 | 0 0 | 0 0 | 21.1  |
| IPR009052 | 0 | 73 0 0  | 0 0 | 0 0 | 0 0 | 0 0 | 0 0 | 69.77 |
| IPR009069 | 0 | 42 0 0  | 0 0 | 0 0 | 0 0 | 0 0 | 0 0 | 30.3  |
| IPR009086 | 0 | 11 0 0  | 0 0 | 0 0 | 0 0 | 0 0 | 0 0 | 42.51 |
| IPR009103 | 0 | 8 0 0   | 0 0 | 0 0 | 0 0 | 0 0 | 0 0 | 70.37 |
| IPR009106 | 0 | 12 0 0  | 0 0 | 0 0 | 0 0 | 0 0 | 0 0 | 64.98 |
| IPR009108 | 0 | 24 0 0  | 0 0 | 0 0 | 0 0 | 0 0 | 0 0 | 34.57 |
| IPR009112 | 0 | 10 0 0  | 0 0 | 0 0 | 0 0 | 0 0 | 0 0 | 63.62 |
| IPR009155 | 0 | 99 0 0  | 0 0 | 0 0 | 0 0 | 0 0 | 0 0 | 38.21 |
| IPR009164 | 0 | 69 0 0  | 0 0 | 0 0 | 0 0 | 0 0 | 0 0 | 53.05 |
| IPR009181 | 0 | 22 0 0  | 0 0 | 0 0 | 0 0 | 0 0 | 0 0 | 45.05 |
| IPR009183 | 0 | 16 0 0  | 0 0 | 0 0 | 0 0 | 0 0 | 0 0 | 36.35 |
| IPR009190 | 0 | 50 0 0  | 0 0 | 0 0 | 0 0 | 0 0 | 0 0 | 57.06 |
| IPR009191 | 0 | 48 0 0  | 0 0 | 0 0 | 0 0 | 0 0 | 0 0 | 60.54 |
| IPR009192 | 0 | 21 0 0  | 0 0 | 0 0 | 0 0 | 0 0 | 0 0 | 61.49 |
| IPR009198 | 0 | 18 0 0  | 0 0 | 0 0 | 0 0 | 0 0 | 0 0 | 30.78 |
| IPR009206 | 0 | 13 0 0  | 0 0 | 0 0 | 0 0 | 0 0 | 0 0 | 45.1  |
| IPR009211 | 0 | 64 0 0  | 0 0 | 0 0 | 0 0 | 0 0 | 0 0 | 30.66 |
| IPR009216 | 0 | 43 0 0  | 0 0 | 0 0 | 0 0 | 0 0 | 0 0 | 45.57 |
| IPR009218 | 0 | 70 0 0  | 0 0 | 0 0 | 0 0 | 0 0 | 0 0 | 25.58 |
| IPR009228 | 0 | 92 0 0  | 0 0 | 0 0 | 0 0 | 0 0 | 0 0 | 32.99 |
| IPR009229 | 0 | 18 0 0  | 0 0 | 0 0 | 0 0 | 0 0 | 0 0 | 45.79 |
| IPR009230 | 0 | 6 0 0   | 0 0 | 0 0 | 0 0 | 0 0 | 0 0 | 68.28 |
| IPR009231 | 0 | 7 0 0   | 0 0 | 0 0 | 0 0 | 0 0 | 0 0 | 66.41 |
| IPR009233 | 0 | 7 0 0   | 0 0 | 0 0 | 0 0 | 0 0 | 0 0 | 32.85 |
| IPR009239 | 0 | 13 0 0  | 0 0 | 0 0 | 0 0 | 0 0 | 0 0 | 86.23 |
| IPR009241 | 0 | 395 0 0 | 0 0 | 0 0 | 0 0 | 0 0 | 0 0 | 19.38 |
| IPR009248 | 0 | 87 0 0  | 0 0 | 0 0 | 0 0 | 0 0 | 0 0 | 67.28 |
| IPR009249 | 0 | 94 0 0  | 0 0 | 0 0 | 0 0 | 0 0 | 0 0 | 21.41 |
| IPR009251 | 0 | 9 0 0   | 0 0 | 0 0 | 0 0 | 0 0 | 0 0 | 59.11 |
| IPR009252 | 0 | 131 0 0 | 0 0 | 0 0 | 0 0 | 0 0 | 0 0 | 51.82 |
| IPR009253 | 0 | 43 0 0  | 0 0 | 0 0 | 0 0 | 0 0 | 0 0 | 63.09 |
| IPR009256 | 0 | 95 0 0  | 0 0 | 0 0 | 0 0 | 0 0 | 0 0 | 47.21 |
| IPR009259 | 0 | 16 0 0  | 0 0 | 0 0 | 0 0 | 0 0 | 0 0 | 44.66 |
| IPR009260 | 0 | 26 0 0  | 0 0 | 0 0 | 0 0 | 0 0 | 0 0 | 31.02 |
| IPR009272 | 0 | 26 0 0  | 0 0 | 0 0 | 0 0 | 0 0 | 0 0 | 29.97 |
| IPR009274 | 0 | 29 0 0  | 0 0 | 0 0 | 0 0 | 0 0 | 0 0 | 88.9  |
| IPR009276 | 0 | 202 1 1 | 0 0 | 0 0 | 0 0 | 0 0 | 0 0 | 20.15 |
| IPR009283 | 0 | 46 0 0  | 0 0 | 0 0 | 0 0 | 0 0 | 0 0 | 45.39 |
| IPR009294 | 0 | 54 0 0  | 0 0 | 0 0 | 0 0 | 0 0 | 0 0 | 42.7  |
| IPR009295 | 0 | 17 0 0  | 0 0 | 0 0 | 0 0 | 0 0 | 0 0 | 80.78 |
| IPR009296 | 0 | 154 0 0 | 0 0 | 0 0 | 0 0 | 0 0 | 0 0 | 58.81 |
| IPR009300 | 0 | 29 0 0  | 0 0 | 0 0 | 0 0 | 0 0 | 0 0 | 83.7  |
| IPR009301 | 0 | 37 0 0  | 0 0 | 0 0 | 0 0 | 0 0 | 0 0 | 81.35 |
| IPR009303 | 0 | 18 0 0  | 0 0 | 0 0 | 0 0 | 0 0 | 0 0 | 77.88 |
| IPR009309 | 0 | 144 0 0 | 0 0 | 0 0 | 0 0 | 0 0 | 0 0 | 63.16 |
| IPR009310 | 0 | 3 0 0   | 0 0 | 0 0 | 0 0 | 0 0 | 0 0 | 53.9  |
| IPR009311 | 0 | 56 0 0  | 0 0 | 0 0 | 0 0 | 0 0 | 0 0 | 51.09 |
| IPR009312 | 0 | 55 0 0  | 0 0 | 0 0 | 0 0 | 0 0 | 0 0 | 63.84 |
| IPR009320 | 0 | 72 0 0  | 0 0 | 0 0 | 0 0 | 0 0 | 0 0 | 70.94 |
| IPR009323 | 0 | 114 0 0 | 0 0 | 0 0 | 0 0 | 0 0 | 0 0 | 48.03 |
| IPR009324 | 0 | 25 0 0  | 0 0 | 0 0 | 0 0 | 0 0 | 0 0 | 27.82 |
| IPR009328 | 0 | 75 0 0  | 0 0 | 0 0 | 0 0 | 0 0 | 0 0 | 62.73 |
| IPR009331 | 0 | 128 0 0 | 0 0 | 0 0 | 0 0 | 0 0 | 0 0 | 25.75 |
| IPR009333 | 0 | 61 0 0  | 0 0 | 0 0 | 0 0 | 0 0 | 0 0 | 38.17 |
| IPR009334 | 0 | 50 0 0  | 0 0 | 0 0 | 0 0 | 0 0 | 0 0 | 55.6  |
| IPR009335 | 0 | 32 0 0  | 0 0 | 0 0 | 0 0 | 0 0 | 0 0 | 17.08 |
| IPR009338 | 0 | 28 0 0  | 0 0 | 0 0 | 0 0 | 0 0 | 0 0 | 91.9  |
| IPR009348 | 0 | 61 0 0  | 0 0 | 0 0 | 0 0 | 1 1 | 0 0 | 34.78 |
| IPR009350 | 0 | 53 0 0  | 0 0 | 0 0 | 0 0 | 0 0 | 0 0 | 56.83 |
| IPR009351 | 0 | 251 0 0 | 0 0 | 0 0 | 0 0 | 0 0 | 0 0 | 18.19 |
| IPR009354 | 0 | 61 0 0  | 0 0 | 0 0 | 0 0 | 0 0 | 0 0 | 61.23 |
| IPR009355 | 0 | 13 0 0  | 0 0 | 0 0 | 0 0 | 0 0 | 0 0 | 50.7  |
| IPR009363 | 0 | 69 0 0  | 0 0 | 0 0 | 0 0 | 0 0 | 0 0 | 17.19 |
| IPR009364 | 0 | 74 0 0  | 0 0 | 0 0 | 0 0 | 0 0 | 0 0 | 26.58 |
| IPR009366 | 0 | 138 0 0 | 0 0 | 0 0 | 0 0 | 0 0 | 0 0 | 45.83 |
| IPR009367 | 0 | 89 0 0  | 0 0 | 0 0 | 0 0 | 0 0 | 0 0 | 20.44 |
| IPR009368 | 0 | 25 0 0  | 0 0 | 0 0 | 0 0 | 0 0 | 0 0 | 83.08 |
| IPR009370 | 0 | 100 0 0 | 0 0 | 0 0 | 0 0 | 0 0 | 0 0 | 57.69 |
| IPR009371 | 0 | 6 0 0   | 0 0 | 0 0 | 0 0 | 0 0 | 0 0 | 25.40 |
| IPR009377 | 0 | 62 0 0  | 0 0 | 0 0 | 0 0 | 0 0 | 0 0 | 58.34 |
| IPR009378 | 0 | 45 0 0  | 0 0 | 0 0 | 0 0 | 0 0 | 0 0 | 20.97 |
| IPR009384 | 0 | 96 0 0  | 0 0 | 0 0 | 0 0 | 0 0 | 0 0 | 43.08 |
| IPR009385 | 0 | 16 0 0  | 0 0 | 0 0 | 0 0 | 0 0 | 0 0 | 77.17 |
| IPR009386 | 0 | 129 0 0 | 0 0 | 0 0 | 0 0 | 0 0 | 0 0 | 40.25 |
| IPR009388 | 0 | 56 0 0  | 0 0 | 0 0 | 0 0 | 0 0 | 0 0 | 43.85 |
| IPR009390 | 0 | 85 0 0  | 0 0 | 0 0 | 0 0 | 0 0 | 0 0 | 67.74 |
| IPR009392 | 0 | 58 0 0  | 0 0 | 0 0 | 0 0 | 0 0 | 0 0 | 29.41 |
| IPR009394 | 0 | 65 0 0  | 0 0 | 0 0 | 0 0 | 0 0 | 0 0 | 43.66 |
| IPR009400 | 0 | 73 0 0  | 0 0 | 0 0 | 0 0 | 0 0 | 0 0 | 39.2  |
| IPR009403 | 0 | 63 0 0  | 0 0 | 0 0 | 0 0 | 0 0 | 0 0 | 42.48 |
| IPR009405 | 0 | 4 0 0   | 0 0 | 0 0 | 0 0 | 0 0 | 0 0 | 99.57 |
| IPR009406 | 0 | 4 0 0   | 0 0 | 0 0 | 0 0 | 0 0 | 0 0 | 28.48 |
| IPR009409 | 0 | 69 0 0  | 0 0 | 0 0 | 0 0 | 0 0 | 0 0 | 34.01 |
| IPR009413 | 0 | 27 0 0  | 0 0 | 0 0 | 0 0 | 0 0 | 0 0 | 26.38 |
| IPR009414 | 0 | 37 0 0  | 0 0 | 0 0 | 0 0 | 0 0 | 0 0 | 28.92 |
| IPR009420 | 0 | 63 0 0  | 0 0 | 0 0 | 0 0 | 0 0 | 0 0 | 57.77 |
| IPR009422 | 0 | 11 0 0  | 0 0 | 0 0 | 0 0 | 0 0 | 0 0 | 34.11 |
| IPR009423 | 0 | 28 0 0  | 0 0 | 0 0 | 0 0 | 0 0 | 0 0 | 35.06 |
| IPR009431 | 0 | 27 0 0  | 0 0 | 0 0 | 0 0 | 0 0 | 0 0 | 63.73 |
| IPR009432 | 0 | 32 0 0  | 0 0 | 0 0 | 0 0 | 0 0 | 0 0 | 37.82 |
| IPR009436 | 0 | 25 0 0  | 0 0 | 0 0 | 0 0 | 0 0 | 0 0 | 44.51 |
| IPR009438 | 0 | 45 0 0  | 0 0 | 0 0 | 0 0 | 0 0 | 0 0 | 36.02 |
| IPR009439 | 0 | 26 0 0  | 0 0 | 0 0 | 0 0 | 0 0 | 0 0 | 39.93 |
| IPR009440 | 0 | 71 0 0  | 0 0 | 0 0 | 0 0 | 0 0 | 0 0 | 16.45 |
| IPR009446 | 0 | 28 0 0  | 0 0 | 0 0 | 0 0 | 0 0 | 0 0 | 60.24 |
| IPR009450 | 0 | 70 0 0  | 0 0 | 0 0 | 0 0 | 0 0 | 0 0 | 27.83 |
| IPR009467 | 0 | 78 0 0  | 0 0 | 0 0 | 0 0 | 0 0 | 0 0 | 31.42 |
| IPR009468 | 0 | 110 0 0 | 0 0 | 0 0 | 0 0 | 0 0 | 0 0 | 38.69 |
| IPR009472 | 0 | 57 0 0  | 0 0 | 0 0 | 0 0 | 0 0 | 0 0 | 36.03 |
| IPR009476 | 0 | 126 0 0 | 0 0 | 0 0 | 0 0 | 0 0 | 0 0 | 39.77 |
| IPR009482 | 0 | 9 0 0   | 0 0 | 0 0 | 0 0 |     |     |       |

|           |   |         |     |     |     |     |     |       |
|-----------|---|---------|-----|-----|-----|-----|-----|-------|
| IPR009483 | 0 | 25 0 0  | 0 0 | 0 0 | 0 0 | 0 0 | 0 0 | 34.11 |
| IPR009488 | 0 | 32 0 0  | 0 0 | 0 0 | 0 0 | 0 0 | 0 0 | 29.18 |
| IPR009489 | 0 | 17 0 0  | 0 0 | 0 0 | 0 0 | 0 0 | 0 0 | 56.47 |
| IPR009491 | 0 | 99 0 0  | 0 0 | 0 0 | 0 0 | 0 0 | 0 0 | 58.16 |
| IPR009492 | 0 | 26 0 0  | 0 0 | 0 0 | 0 0 | 0 0 | 0 0 | 22.16 |
| IPR009494 | 0 | 20 0 0  | 0 0 | 0 0 | 0 0 | 0 0 | 0 0 | 63.44 |
| IPR009495 | 0 | 95 0 0  | 0 0 | 0 0 | 0 0 | 0 0 | 0 0 | 19.35 |
| IPR009502 | 0 | 58 0 0  | 0 0 | 0 0 | 0 0 | 0 0 | 0 0 | 64.39 |
| IPR009507 | 0 | 53 0 0  | 0 0 | 0 0 | 0 0 | 0 0 | 0 0 | 45.4  |
| IPR009510 | 0 | 17 0 0  | 0 0 | 0 0 | 0 0 | 0 0 | 0 0 | 31.93 |
| IPR009511 | 0 | 15 0 0  | 0 0 | 0 0 | 0 0 | 0 0 | 0 0 | 42.41 |
| IPR009515 | 0 | 22 0 0  | 0 0 | 0 0 | 0 0 | 0 0 | 0 0 | 70.36 |
| IPR009518 | 0 | 55 0 0  | 0 0 | 0 0 | 0 0 | 0 0 | 0 0 | 46.07 |
| IPR009530 | 0 | 43 0 0  | 0 0 | 0 0 | 0 0 | 0 0 | 0 0 | 50.37 |
| IPR009531 | 0 | 63 0 0  | 0 0 | 0 0 | 0 0 | 0 0 | 0 0 | 38.23 |
| IPR009532 | 0 | 3 0 0   | 0 0 | 0 0 | 0 0 | 0 0 | 0 0 | 96.59 |
| IPR009533 | 0 | 40 0 0  | 0 0 | 0 0 | 0 0 | 0 0 | 0 0 | 41    |
| IPR009534 | 0 | 77 0 0  | 0 0 | 0 0 | 0 0 | 0 0 | 0 0 | 55.48 |
| IPR009538 | 0 | 9 0 0   | 0 0 | 0 0 | 0 0 | 0 0 | 0 0 | 44.45 |
| IPR009539 | 0 | 38 0 0  | 0 0 | 0 0 | 0 0 | 0 0 | 0 0 | 51.86 |
| IPR009542 | 0 | 79 0 0  | 0 0 | 0 0 | 0 0 | 0 0 | 0 0 | 31.31 |
| IPR009553 | 0 | 43 0 0  | 0 0 | 0 0 | 0 0 | 0 0 | 0 0 | 22.08 |
| IPR009561 | 0 | 31 0 0  | 0 0 | 0 0 | 0 0 | 0 0 | 0 0 | 49.14 |
| IPR009562 | 0 | 121 1 1 | 0 0 | 0 0 | 0 0 | 0 0 | 0 0 | 40.67 |
| IPR009565 | 0 | 23 0 0  | 0 0 | 0 0 | 0 0 | 0 0 | 0 0 | 28.81 |
| IPR009569 | 0 | 88 0 0  | 0 0 | 0 0 | 0 0 | 0 0 | 0 0 | 41.99 |
| IPR009573 | 0 | 9 0 0   | 0 0 | 0 0 | 0 0 | 0 0 | 0 0 | 44.83 |
| IPR009574 | 0 | 41 0 0  | 0 0 | 0 0 | 0 0 | 0 0 | 0 0 | 28.1  |
| IPR009576 | 0 | 147 0 0 | 0 0 | 0 0 | 0 0 | 0 0 | 0 0 | 39.11 |
| IPR009579 | 0 | 47 0 0  | 0 0 | 0 0 | 0 0 | 0 0 | 0 0 | 39.7  |
| IPR009585 | 0 | 8 0 0   | 0 0 | 0 0 | 0 0 | 0 0 | 0 0 | 98.3  |
| IPR009587 | 0 | 54 0 0  | 0 0 | 0 0 | 0 0 | 0 0 | 0 0 | 70.97 |
| IPR009592 | 0 | 42 0 0  | 0 0 | 0 0 | 0 0 | 0 0 | 0 0 | 70.16 |
| IPR009597 | 0 | 229 0 0 | 0 0 | 0 0 | 0 0 | 0 0 | 0 0 | 17.9  |
| IPR009599 | 0 | 18 0 0  | 0 0 | 0 0 | 0 0 | 0 0 | 0 0 | 26.56 |
| IPR009603 | 0 | 341 0 0 | 0 0 | 0 0 | 0 0 | 0 0 | 0 0 | 57.66 |
| IPR009609 | 0 | 123 0 0 | 0 0 | 0 0 | 0 0 | 0 0 | 0 0 | 35.33 |
| IPR009620 | 0 | 95 0 0  | 0 0 | 0 0 | 0 0 | 0 0 | 0 0 | 14.94 |
| IPR009621 | 0 | 21 0 0  | 0 0 | 0 0 | 0 0 | 0 0 | 0 0 | 48.58 |
| IPR009622 | 0 | 27 0 0  | 0 0 | 0 0 | 0 0 | 0 0 | 0 0 | 38.57 |
| IPR009623 | 0 | 7 0 0   | 0 0 | 0 0 | 0 0 | 0 0 | 0 0 | 67.07 |
| IPR009624 | 0 | 71 0 0  | 0 0 | 0 0 | 0 0 | 0 0 | 0 0 | 77.91 |
| IPR009625 | 0 | 9 0 0   | 0 0 | 0 0 | 0 0 | 0 0 | 0 0 | 47.58 |
| IPR009627 | 0 | 80 0 0  | 0 0 | 0 0 | 0 0 | 0 0 | 0 0 | 43.64 |
| IPR009634 | 0 | 42 0 0  | 0 0 | 0 0 | 0 0 | 0 0 | 0 0 | 40.32 |
| IPR009638 | 0 | 42 0 0  | 0 0 | 0 0 | 0 0 | 0 0 | 0 0 | 36.17 |
| IPR009649 | 0 | 81 0 0  | 0 0 | 0 0 | 0 0 | 0 0 | 0 0 | 43.56 |
| IPR009659 | 0 | 134 0 0 | 0 0 | 0 0 | 0 0 | 0 0 | 0 0 | 42.81 |
| IPR009660 | 0 | 16 0 0  | 0 0 | 0 0 | 0 0 | 0 0 | 0 0 | 28.17 |
| IPR009663 | 0 | 43 0 0  | 0 0 | 0 0 | 0 0 | 0 0 | 0 0 | 15.63 |
| IPR009664 | 0 | 216 0 0 | 0 0 | 0 0 | 0 0 | 0 0 | 0 0 | 41.16 |
| IPR009665 | 0 | 93 0 0  | 0 0 | 0 0 | 0 0 | 0 0 | 0 0 | 44.57 |
| IPR009668 | 0 | 79 0 0  | 0 0 | 0 0 | 0 0 | 0 0 | 0 0 | 16.24 |
| IPR009669 | 0 | 7 0 0   | 0 0 | 0 0 | 0 0 | 0 0 | 0 0 | 42.66 |
| IPR009680 | 0 | 12 1 1  | 0 0 | 0 0 | 0 0 | 0 0 | 0 0 | 38.47 |
| IPR009682 | 0 | 22 0 0  | 0 0 | 0 0 | 0 0 | 0 0 | 0 0 | 94.06 |
| IPR009684 | 0 | 9 0 0   | 0 0 | 0 0 | 0 0 | 0 0 | 0 0 | 39.88 |
| IPR009693 | 0 | 82 0 0  | 0 0 | 0 0 | 0 0 | 0 0 | 0 0 | 39.39 |
| IPR009700 | 0 | 54 0 0  | 0 0 | 0 0 | 0 0 | 0 0 | 0 0 | 70.89 |
| IPR009702 | 0 | 44 0 0  | 0 0 | 0 0 | 0 0 | 0 0 | 0 0 | 24.45 |
| IPR009703 | 0 | 16 0 0  | 0 0 | 0 0 | 0 0 | 0 0 | 0 0 | 29.27 |
| IPR009704 | 0 | 11 0 0  | 0 0 | 0 0 | 0 0 | 0 0 | 0 0 | 69.39 |
| IPR009707 | 0 | 85 0 0  | 0 0 | 0 0 | 0 0 | 0 0 | 0 0 | 65.06 |
| IPR009708 | 0 | 4 0 0   | 0 0 | 0 0 | 0 0 | 0 0 | 0 0 | 32.56 |
| IPR009709 | 0 | 88 0 0  | 0 0 | 0 0 | 0 0 | 0 0 | 0 0 | 53.9  |
| IPR009713 | 0 | 18 0 0  | 0 0 | 0 0 | 0 0 | 0 0 | 0 0 | 62.57 |
| IPR009727 | 0 | 58 0 0  | 0 0 | 0 0 | 0 0 | 0 0 | 0 0 | 47.82 |
| IPR009729 | 0 | 32 0 0  | 0 0 | 0 0 | 0 0 | 0 0 | 0 0 | 33.86 |
| IPR009731 | 0 | 67 0 0  | 0 0 | 0 0 | 0 0 | 0 0 | 0 0 | 34.04 |
| IPR009742 | 0 | 326 0 0 | 0 0 | 0 0 | 0 0 | 0 0 | 0 0 | 26.7  |
| IPR009746 | 0 | 71 0 0  | 0 0 | 0 0 | 0 0 | 0 0 | 0 0 | 70.94 |
| IPR009749 | 0 | 131 0 0 | 0 0 | 0 0 | 0 0 | 0 0 | 0 0 | 51.33 |
| IPR009750 | 0 | 8 0 0   | 0 0 | 0 0 | 0 0 | 0 0 | 0 0 | 55.51 |
| IPR009752 | 0 | 47 0 0  | 0 0 | 0 0 | 0 0 | 0 0 | 0 0 | 19.24 |
| IPR009753 | 0 | 13 0 0  | 0 0 | 0 0 | 0 0 | 0 0 | 0 0 | 62.11 |
| IPR009758 | 0 | 59 0 0  | 0 0 | 0 0 | 0 0 | 0 0 | 0 0 | 26.43 |
| IPR009759 | 0 | 41 0 0  | 0 0 | 0 0 | 0 0 | 0 0 | 0 0 | 63.93 |
| IPR009765 | 0 | 176 0 0 | 0 0 | 0 0 | 0 0 | 0 0 | 0 0 | 75.4  |
| IPR009776 | 0 | 89 0 0  | 0 0 | 0 0 | 0 0 | 0 0 | 0 0 | 30.49 |
| IPR009778 | 0 | 97 0 0  | 0 0 | 0 0 | 0 0 | 0 0 | 0 0 | 48.94 |
| IPR009779 | 0 | 38 0 0  | 0 0 | 0 0 | 0 0 | 0 0 | 0 0 | 66.58 |
| IPR009780 | 0 | 19 0 0  | 0 0 | 0 0 | 0 0 | 0 0 | 0 0 | 58.3  |
| IPR009781 | 0 | 121 0 0 | 0 0 | 0 0 | 0 0 | 0 0 | 0 0 | 28.09 |
| IPR009782 | 0 | 13 0 0  | 0 0 | 0 0 | 0 0 | 0 0 | 0 0 | 62.38 |
| IPR009787 | 0 | 37 0 0  | 0 0 | 0 0 | 0 0 | 0 0 | 0 0 | 32.3  |
| IPR009790 | 0 | 31 0 0  | 0 0 | 0 0 | 0 0 | 0 0 | 0 0 | 40.82 |
| IPR009794 | 0 | 24 0 0  | 0 0 | 0 0 | 0 0 | 0 0 | 0 0 | 48.1  |
| IPR009796 | 0 | 16 0 0  | 0 0 | 0 0 | 0 0 | 0 0 | 0 0 | 60.8  |
| IPR009797 | 0 | 48 0 0  | 0 0 | 0 0 | 0 0 | 0 0 | 0 0 | 40.87 |
| IPR009801 | 0 | 27 0 0  | 0 0 | 0 0 | 0 0 | 0 0 | 0 0 | 38.68 |
| IPR009802 | 0 | 12 0 0  | 0 0 | 0 0 | 0 0 | 0 0 | 0 0 | 58.73 |
| IPR009806 | 0 | 18 0 0  | 0 0 | 0 0 | 0 0 | 0 0 | 0 0 | 55.15 |
| IPR009808 | 0 | 5 0 0   | 0 0 | 0 0 | 0 0 | 0 0 | 0 0 | 80.28 |
| IPR009814 | 0 | 18 0 0  | 0 0 | 0 0 | 0 0 | 0 0 | 0 0 | 83.14 |
| IPR009821 | 0 | 44 0 0  | 0 0 | 0 0 | 0 0 | 0 0 | 0 0 | 88.26 |
| IPR009822 | 0 | 213 0 0 | 0 0 | 0 0 | 0 0 | 0 0 | 0 0 | 39.38 |
| IPR009824 | 0 | 15 0 0  | 0 0 | 0 0 | 0 0 | 0 0 | 0 0 | 43.67 |
| IPR009829 | 0 | 16 0 0  | 0 0 | 0 0 | 0 0 | 0 0 | 0 0 | 24.74 |
| IPR009833 | 0 | 80 0 0  | 0 0 | 0 0 | 0 0 | 0 0 | 0 0 | 36.76 |
| IPR009838 | 0 | 62 0 0  | 0 0 | 0 0 | 0 0 | 0 0 | 0 0 | 17.65 |
| IPR009839 | 0 | 102 0 0 | 0 0 | 0 0 | 0 0 | 0 0 | 0 0 | 38.83 |
| IPR009841 | 0 | 4 0 0   | 0 0 | 0 0 | 0 0 | 0 0 | 0 0 | 50.41 |
| IPR009842 | 0 | 21 0 0  | 0 0 | 0 0 | 0 0 | 0 0 | 0 0 | 68.89 |
| IPR009843 | 0 | 19 0 0  | 0 0 | 0 0 | 0 0 | 0 0 | 0 0 | 33.41 |
| IPR009844 | 0 | 30 0 0  | 0 0 | 0 0 | 0 0 | 0 0 | 0 0 | 30.35 |
| IPR009847 | 0 | 5 0 0   | 0 0 | 0 0 | 0 0 | 0 0 | 0 0 | 86.6  |
| IPR009856 | 0 | 13 0 0  | 0 0 | 0 0 | 0 0 | 0 0 | 0 0 | 44.81 |
| IPR009858 | 0 | 112 0 0 | 0 0 | 0 0 | 0 0 | 0 0 | 0 0 | 45.58 |
| IPR009861 | 0 | 7 0 0   | 0 0 | 0 0 | 0 0 | 0 0 | 0 0 | 63.66 |
| IPR009863 | 0 | 10 0 0  | 0 0 | 0 0 | 0 0 | 0 0 | 0 0 | 55.45 |
| IPR009867 | 0 | 73 0 0  | 0 0 | 0 0 | 0 0 | 0 0 | 0 0 | 68.62 |
| IPR009868 | 0 | 4 0 0   | 0 0 | 0 0 | 0 0 | 0 0 | 0 0 | 46.02 |
| IPR009872 | 0 | 105 0 0 | 0 0 | 0 0 | 0 0 | 0 0 | 0 0 | 48.56 |
| IPR009874 | 0 | 108 0 0 | 0 0 | 0 0 | 0 0 | 0 0 | 0 0 | 52.07 |
| IPR009883 | 0 | 71 0 0  | 0 0 | 0 0 | 0 0 | 0 0 | 0 0 | 57.11 |
| IPR009885 | 0 | 60 0 0  | 0 0 | 0 0 | 0 0 | 0 0 | 0 0 | 65.57 |
| IPR009888 | 0 | 10 0 0  | 0 0 | 0 0 | 0 0 | 0 0 | 0 0 | 35.15 |
| IPR009889 | 0 | 10 0 0  | 0 0 | 0 0 | 0 0 | 0 0 | 0 0 | 55.71 |
| IPR009896 | 0 | 3 0 0   | 0 0 | 0 0 | 0 0 | 0 0 | 0 0 | 100   |
| IPR009901 | 0 | 38 0 0  | 0 0 | 0 0 | 0 0 | 0 0 | 0 0 | 47.19 |
| IPR009907 | 0 | 96 0 0  | 0 0 | 0 0 | 0 0 | 0 0 | 0 0 | 49.93 |
| IPR009910 | 0 | 101 0 0 | 0 0 | 0 0 | 0 0 | 0 0 | 0 0 | 40.21 |
| IPR009912 | 0 | 110 0 0 | 0 0 | 0 0 | 0 0 | 0 0 | 0 0 | 45.16 |
| IPR009913 | 0 | 8 0 0   | 0 0 | 0 0 | 0 0 | 0 0 | 0 0 | 62.19 |
| IPR009914 | 0 | 55 0 0  | 0 0 | 0 0 | 0 0 | 0 0 | 0 0 | 42.57 |
| IPR009916 | 0 | 86 0 0  | 0 0 | 0 0 | 0 0 | 0 0 | 0 0 | 45.19 |
| IPR009918 | 0 | 62 0 0  | 0 0 | 0 0 | 0 0 | 0 0 | 0 0 | 72.37 |
| IPR009921 | 0 | 286 0 0 | 0 0 | 0 0 | 0 0 | 0 0 | 0 0 | 32.71 |
| IPR009922 | 0 | 94 0 0  | 0 0 | 0 0 | 0 0 | 0 0 | 0 0 | 16.19 |
| IPR009923 | 0 | 186 0 0 | 0 0 | 0 0 | 0 0 | 0 0 | 0 0 | 42.57 |
| IPR009925 | 0 | 13 0 0  | 0 0 | 0 0 | 0 0 | 0 0 | 0 0 | 53.04 |
| IPR009927 | 0 | 19 0 0  | 0 0 | 0 0 | 0 0 | 0 0 | 0 0 | 31.23 |
| IPR009929 | 0 | 22 0 0  | 0 0 | 0 0 | 0 0 | 0 0 | 0 0 | 20.8  |
| IPR009932 | 0 | 5 0 0   | 0 0 | 0 0 | 0 0 | 0 0 | 0 0 | 77.04 |
| IPR009933 | 0 | 5 0 0   | 0 0 | 0 0 | 0 0 | 0 0 | 0 0 | 47.37 |
| IPR009935 | 0 | 69 0 0  | 0 0 | 0 0 | 0 0 | 0 0 | 0 0 | 30.4  |
| IPR009941 | 0 | 13 0 0  | 0 0 | 0 0 | 0 0 | 0 0 | 0 0 | 59.05 |
| IPR009942 | 0 | 12 0 0  | 0 0 | 0 0 | 0 0 | 0 0 | 0 0 | 59.57 |
| IPR009943 | 0 | 15 0 0  | 0 0 | 0 0 | 0 0 | 0 0 | 0 0 | 48.54 |
| IPR009947 | 0 | 39 0 0  | 0 0 | 0 0 | 0 0 | 0 0 | 0 0 | 43.55 |
| IPR009948 | 0 | 99 0 0  | 0 0 | 0 0 | 0 0 | 0 0 | 0 0 | 47.5  |
| IPR009950 | 0 | 54 0 0  | 0 0 | 0 0 | 0 0 | 0 0 | 0 0 | 82.21 |
| IPR009952 | 0 | 6 0 0   | 0 0 | 0 0 | 0 0 | 0 0 | 0 0 | 69.66 |
| IPR009953 | 0 | 30 0 0  | 0 0 | 0 0 | 0 0 | 0 0 | 0 0 | 42.48 |
| IPR009954 | 0 | 87 0 0  | 0 0 | 0 0 | 0 0 | 0 0 | 0 0 | 55.91 |
| IPR009956 | 0 | 85 0 0  | 0 0 | 0 0 | 0 0 | 0 0 | 0 0 | 29.47 |
| IPR009957 | 0 | 10 0 0  | 0 0 | 0 0 | 0 0 |     |     |       |

|           |   |         |     |     |     |     |     |       |
|-----------|---|---------|-----|-----|-----|-----|-----|-------|
| IPRO09962 | 0 | 199 0 0 | 0 0 | 0 0 | 0 0 | 0 0 | 0 0 | 15.61 |
| IPRO09963 | 0 | 30 0 0  | 0 0 | 0 0 | 0 0 | 0 0 | 0 0 | 49.75 |
| IPRO09964 | 0 | 66 0 0  | 0 0 | 0 0 | 0 0 | 0 0 | 0 0 | 35.29 |
| IPRO09968 | 0 | 5 0 0   | 0 0 | 0 0 | 0 0 | 0 0 | 0 0 | 71.95 |
| IPRO09971 | 0 | 60 0 0  | 0 0 | 0 0 | 0 0 | 0 0 | 0 0 | 51.39 |
| IPRO09978 | 0 | 38 0 0  | 0 0 | 0 0 | 0 0 | 0 0 | 0 0 | 48.91 |
| IPRO09983 | 0 | 53 0 0  | 0 0 | 0 0 | 0 0 | 0 0 | 0 0 | 67.72 |
| IPRO09986 | 0 | 72 0 0  | 0 0 | 0 0 | 0 0 | 0 0 | 0 0 | 67.72 |
| IPRO09987 | 0 | 31 0 0  | 0 0 | 0 0 | 0 0 | 0 0 | 0 0 | 19.77 |
| IPRO09988 | 0 | 34 0 0  | 0 0 | 0 0 | 0 0 | 0 0 | 0 0 | 41.83 |
| IPRO09989 | 0 | 32 0 0  | 0 0 | 0 0 | 0 0 | 0 0 | 0 0 | 30.25 |
| IPRO09991 | 0 | 35 0 0  | 0 0 | 0 0 | 0 0 | 0 0 | 0 0 | 36.01 |
| IPRO09993 | 0 | 73 0 0  | 0 0 | 0 0 | 0 0 | 0 0 | 0 0 | 61.23 |
| IPRO09995 | 0 | 20 0 0  | 0 0 | 0 0 | 0 0 | 0 0 | 0 0 | 43.5  |
| IPRO09996 | 0 | 75 0 0  | 0 0 | 0 0 | 0 0 | 0 0 | 0 0 | 19.79 |
| IPRO09998 | 0 | 93 0 0  | 0 0 | 0 0 | 0 0 | 0 0 | 0 0 | 39.33 |
| IPRO09999 | 0 | 19 0 0  | 0 0 | 0 0 | 0 0 | 0 0 | 0 0 | 61.54 |
| IPRO10001 | 0 | 76 0 0  | 0 0 | 0 0 | 0 0 | 0 0 | 0 0 | 33.18 |
| IPRO10005 | 0 | 83 0 0  | 0 0 | 0 0 | 0 0 | 0 0 | 0 0 | 60.23 |
| IPRO10006 | 0 | 23 0 0  | 0 0 | 0 0 | 0 0 | 0 0 | 0 0 | 36.23 |
| IPRO10008 | 0 | 7 0 0   | 0 0 | 0 0 | 0 0 | 0 0 | 0 0 | 35.06 |
| IPRO10010 | 0 | 26 0 0  | 0 0 | 0 0 | 0 0 | 0 0 | 0 0 | 55.67 |
| IPRO10022 | 0 | 46 0 0  | 0 0 | 0 0 | 0 0 | 0 0 | 0 0 | 30.72 |
| IPRO10023 | 0 | 64 0 0  | 0 0 | 0 0 | 0 0 | 0 0 | 0 0 | 34.75 |
| IPRO10026 | 0 | 16 0 0  | 0 0 | 0 0 | 0 0 | 0 0 | 0 0 | 35.55 |
| IPRO10027 | 0 | 55 0 0  | 0 0 | 0 0 | 0 0 | 0 0 | 0 0 | 49.43 |
| IPRO10070 | 0 | 124 0 0 | 0 0 | 0 0 | 0 0 | 0 0 | 0 0 | 75.99 |
| IPRO10075 | 0 | 25 0 0  | 0 0 | 0 0 | 0 0 | 0 0 | 0 0 | 38.35 |
| IPRO10137 | 0 | 141 0 0 | 0 0 | 0 0 | 0 0 | 0 0 | 0 0 | 38.61 |
| IPRO10144 | 0 | 70 0 0  | 0 0 | 0 0 | 0 0 | 0 0 | 0 0 | 18.88 |
| IPRO10148 | 0 | 104 0 0 | 0 0 | 0 0 | 0 0 | 0 0 | 0 0 | 31.74 |
| IPRO10149 | 0 | 44 0 0  | 0 0 | 0 0 | 0 0 | 0 0 | 0 0 | 18.79 |
| IPRO10160 | 0 | 41 0 0  | 0 0 | 0 0 | 0 0 | 0 0 | 0 0 | 14.38 |
| IPRO10179 | 0 | 109 0 0 | 0 0 | 0 0 | 0 0 | 0 0 | 0 0 | 23.21 |
| IPRO10190 | 0 | 7 0 0   | 0 0 | 0 0 | 0 0 | 0 0 | 0 0 | 51.28 |
| IPRO10220 | 0 | 42 0 0  | 0 0 | 0 0 | 0 0 | 0 0 | 0 0 | 58    |
| IPRO10239 | 0 | 226 0 0 | 0 0 | 0 0 | 0 0 | 0 0 | 0 0 | 19.25 |
| IPRO10263 | 0 | 276 0 0 | 0 0 | 0 0 | 0 0 | 0 0 | 0 0 | 21.18 |
| IPRO10266 | 0 | 201 0 0 | 0 0 | 0 0 | 0 0 | 0 0 | 0 0 | 21.51 |
| IPRO10272 | 0 | 307 0 0 | 0 0 | 0 0 | 0 0 | 0 0 | 0 0 | 24.55 |
| IPRO10273 | 0 | 221 0 0 | 0 0 | 0 0 | 0 0 | 0 0 | 0 0 | 18.73 |
| IPRO10276 | 0 | 76 0 0  | 0 0 | 0 0 | 0 0 | 0 0 | 0 0 | 59.79 |
| IPRO10286 | 0 | 207 0 0 | 0 0 | 0 0 | 0 0 | 0 0 | 0 0 | 31.57 |
| IPRO10288 | 0 | 136 0 0 | 0 0 | 0 0 | 0 0 | 0 0 | 0 0 | 19.44 |
| IPRO10293 | 0 | 101 0 0 | 0 0 | 0 0 | 0 0 | 0 0 | 0 0 | 37.41 |
| IPRO10295 | 0 | 124 0 0 | 0 0 | 0 0 | 0 0 | 0 0 | 0 0 | 22.32 |
| IPRO10296 | 0 | 173 0 0 | 0 0 | 0 0 | 0 0 | 0 0 | 0 0 | 36.07 |
| IPRO10306 | 0 | 122 0 0 | 0 0 | 0 0 | 0 0 | 0 0 | 0 0 | 70.74 |
| IPRO10319 | 0 | 203 0 0 | 0 0 | 0 0 | 0 0 | 0 0 | 0 0 | 28.7  |
| IPRO10321 | 0 | 53 0 0  | 0 0 | 0 0 | 0 0 | 0 0 | 0 0 | 22.08 |
| IPRO10326 | 0 | 103 0 0 | 0 0 | 0 0 | 0 0 | 0 0 | 0 0 | 17.31 |
| IPRO10330 | 0 | 142 0 0 | 0 0 | 0 0 | 0 0 | 0 0 | 0 0 | 16.76 |
| IPRO10331 | 0 | 149 0 0 | 0 0 | 0 0 | 0 0 | 0 0 | 0 0 | 22.51 |
| IPRO10335 | 0 | 5 0 0   | 0 0 | 0 0 | 0 0 | 0 0 | 0 0 | 35.91 |
| IPRO10341 | 0 | 57 0 0  | 0 0 | 0 0 | 0 0 | 0 0 | 0 0 | 24.83 |
| IPRO10342 | 0 | 172 0 0 | 0 0 | 0 0 | 0 0 | 0 0 | 0 0 | 35.6  |
| IPRO10343 | 0 | 339 1 1 | 0 0 | 0 0 | 0 0 | 0 0 | 0 0 | 10.34 |
| IPRO10345 | 0 | 45 0 0  | 0 0 | 0 0 | 0 0 | 0 0 | 0 0 | 21.6  |
| IPRO10352 | 0 | 165 0 0 | 0 0 | 0 0 | 0 0 | 0 0 | 0 0 | 20.43 |
| IPRO10354 | 0 | 124 0 0 | 0 0 | 0 0 | 0 0 | 0 0 | 0 0 | 41.77 |
| IPRO10356 | 0 | 17 0 0  | 0 0 | 0 0 | 0 0 | 0 0 | 0 0 | 89.33 |
| IPRO10358 | 0 | 24 0 0  | 0 0 | 0 0 | 0 0 | 0 0 | 0 0 | 38.23 |
| IPRO10360 | 0 | 66 0 0  | 0 0 | 0 0 | 0 0 | 0 0 | 0 0 | 47.17 |
| IPRO10364 | 0 | 115 0 0 | 0 0 | 0 0 | 0 0 | 0 0 | 0 0 | 37.4  |
| IPRO10365 | 0 | 42 0 0  | 0 0 | 0 0 | 0 0 | 0 0 | 0 0 | 43.68 |
| IPRO10368 | 0 | 171 0 0 | 0 0 | 0 0 | 0 0 | 0 0 | 0 0 | 22.15 |
| IPRO10374 | 0 | 113 0 0 | 0 0 | 0 0 | 0 0 | 0 0 | 0 0 | 49.41 |
| IPRO10375 | 0 | 113 0 0 | 0 0 | 0 0 | 0 0 | 0 0 | 0 0 | 48.72 |
| IPRO10377 | 0 | 109 0 0 | 0 0 | 0 0 | 0 0 | 0 0 | 0 0 | 39.76 |
| IPRO10379 | 0 | 101 0 0 | 0 0 | 0 0 | 0 0 | 0 0 | 0 0 | 28.02 |
| IPRO10386 | 0 | 162 0 0 | 0 0 | 0 0 | 0 0 | 0 0 | 0 0 | 35.94 |
| IPRO10387 | 0 | 135 0 0 | 0 0 | 0 0 | 0 0 | 0 0 | 0 0 | 27.36 |
| IPRO10390 | 0 | 342 0 0 | 0 0 | 0 0 | 0 0 | 0 0 | 0 0 | 10.53 |
| IPRO10391 | 0 | 174 0 0 | 0 0 | 0 0 | 0 0 | 0 0 | 0 0 | 39.44 |
| IPRO10393 | 0 | 101 0 0 | 0 0 | 0 0 | 0 0 | 0 0 | 0 0 | 49.36 |
| IPRO10398 | 0 | 109 0 0 | 0 0 | 0 0 | 0 0 | 0 0 | 0 0 | 47.13 |
| IPRO10404 | 0 | 68 0 0  | 0 0 | 0 0 | 0 0 | 0 0 | 0 0 | 26.97 |
| IPRO10409 | 0 | 53 0 0  | 0 0 | 0 0 | 0 0 | 0 0 | 0 0 | 40.4  |
| IPRO10410 | 0 | 43 0 0  | 0 0 | 0 0 | 0 0 | 0 0 | 0 0 | 50.29 |
| IPRO10411 | 0 | 18 0 0  | 0 0 | 0 0 | 0 0 | 0 0 | 0 0 | 64.28 |
| IPRO10426 | 0 | 55 0 0  | 0 0 | 0 0 | 0 0 | 0 0 | 0 0 | 26    |
| IPRO10434 | 0 | 54 0 0  | 0 0 | 0 0 | 0 0 | 0 0 | 0 0 | 43.38 |
| IPRO10438 | 0 | 32 0 0  | 0 0 | 0 0 | 0 0 | 0 0 | 0 0 | 69.05 |
| IPRO10443 | 0 | 10 0 0  | 0 0 | 0 0 | 0 0 | 0 0 | 0 0 | 92.55 |
| IPRO10444 | 0 | 21 0 0  | 0 0 | 0 0 | 0 0 | 0 0 | 0 0 | 62.03 |
| IPRO10446 | 0 | 15 0 0  | 0 0 | 0 0 | 0 0 | 0 0 | 0 0 | 37.32 |
| IPRO10448 | 0 | 64 0 0  | 0 0 | 0 0 | 0 0 | 0 0 | 0 0 | 36.09 |
| IPRO10452 | 0 | 136 0 0 | 0 0 | 0 0 | 0 0 | 0 0 | 0 0 | 50.48 |
| IPRO10454 | 0 | 11 0 0  | 0 0 | 0 0 | 0 0 | 0 0 | 0 0 | 64.22 |
| IPRO10455 | 0 | 31 0 0  | 0 0 | 0 0 | 0 0 | 0 0 | 0 0 | 59.07 |
| IPRO10462 | 0 | 73 0 0  | 0 0 | 0 0 | 0 0 | 0 0 | 0 0 | 48.7  |
| IPRO10475 | 0 | 24 0 0  | 0 0 | 0 0 | 0 0 | 0 0 | 0 0 | 44.8  |
| IPRO10476 | 0 | 71 0 0  | 0 0 | 0 0 | 0 0 | 0 0 | 0 0 | 70.11 |
| IPRO10479 | 0 | 14 0 0  | 0 0 | 0 0 | 0 0 | 0 0 | 0 0 | 51.14 |
| IPRO10480 | 0 | 12 0 0  | 0 0 | 0 0 | 0 0 | 0 0 | 0 0 | 18.55 |
| IPRO10495 | 0 | 18 0 0  | 0 0 | 0 0 | 0 0 | 0 0 | 0 0 | 42.15 |
| IPRO10498 | 0 | 5 0 0   | 0 0 | 0 0 | 0 0 | 0 0 | 0 0 | 39.14 |
| IPRO10500 | 0 | 14 0 0  | 0 0 | 0 0 | 0 0 | 0 0 | 0 0 | 47.43 |
| IPRO10510 | 0 | 14 0 0  | 0 0 | 0 0 | 0 0 | 0 0 | 0 0 | 23.29 |
| IPRO10522 | 0 | 11 0 0  | 0 0 | 0 0 | 0 0 | 0 0 | 0 0 | 57.58 |
| IPRO10530 | 0 | 31 0 0  | 0 0 | 0 0 | 0 0 | 0 0 | 0 0 | 54.92 |
| IPRO10531 | 0 | 31 0 0  | 0 0 | 0 0 | 0 0 | 0 0 | 0 0 | 68.08 |
| IPRO10532 | 0 | 32 0 0  | 0 0 | 0 0 | 0 0 | 0 0 | 0 0 | 28.46 |
| IPRO10534 | 0 | 91 0 0  | 0 0 | 0 0 | 0 0 | 0 0 | 0 0 | 31.12 |
| IPRO10548 | 0 | 50 0 0  | 0 0 | 0 0 | 0 0 | 0 0 | 0 0 | 43.68 |
| IPRO10557 | 0 | 15 0 0  | 0 0 | 0 0 | 0 0 | 0 0 | 0 0 | 76.43 |
| IPRO10564 | 0 | 4 0 0   | 0 0 | 0 0 | 0 0 | 0 0 | 0 0 | 72.07 |
| IPRO10567 | 0 | 16 0 0  | 0 0 | 0 0 | 0 0 | 0 0 | 0 0 | 25.38 |
| IPRO10574 | 0 | 69 0 0  | 0 0 | 0 0 | 0 0 | 0 0 | 0 0 | 75.41 |
| IPRO10586 | 0 | 9 0 0   | 0 0 | 0 0 | 0 0 | 0 0 | 0 0 | 19.78 |
| IPRO10590 | 0 | 43 0 0  | 0 0 | 0 0 | 0 0 | 0 0 | 0 0 | 90.85 |
| IPRO10591 | 0 | 70 0 0  | 0 0 | 0 0 | 0 0 | 0 0 | 0 0 | 27.89 |
| IPRO10592 | 0 | 7 0 0   | 0 0 | 0 0 | 0 0 | 0 0 | 0 0 | 36.32 |
| IPRO10595 | 0 | 85 0 0  | 0 0 | 0 0 | 0 0 | 0 0 | 0 0 | 52.42 |
| IPRO10604 | 0 | 11 0 0  | 0 0 | 0 0 | 0 0 | 0 0 | 0 0 | 69.90 |
| IPRO10617 | 0 | 145 0 0 | 0 0 | 0 0 | 0 0 | 0 0 | 0 0 | 26.97 |
| IPRO10619 | 0 | 606 0 0 | 0 0 | 0 0 | 0 0 | 0 0 | 0 0 | 9.18  |
| IPRO10626 | 0 | 135 0 0 | 0 0 | 0 0 | 0 0 | 0 0 | 0 0 | 22.66 |
| IPRO10633 | 0 | 77 0 0  | 0 0 | 0 0 | 0 0 | 0 0 | 0 0 | 42.39 |
| IPRO10634 | 0 | 102 0 0 | 0 0 | 0 0 | 0 0 | 0 0 | 0 0 | 31.05 |
| IPRO10646 | 0 | 48 0 0  | 0 0 | 0 0 | 0 0 | 0 0 | 0 0 | 73.91 |
| IPRO10649 | 0 | 69 0 0  | 0 0 | 0 0 | 0 0 | 0 0 | 0 0 | 40.7  |
| IPRO10653 | 0 | 185 0 0 | 0 0 | 0 0 | 0 0 | 0 0 | 0 0 | 23.11 |
| IPRO10680 | 0 | 16 0 0  | 0 0 | 0 0 | 0 0 | 0 0 | 0 0 | 55.8  |
| IPRO10688 | 0 | 58 0 0  | 0 0 | 0 0 | 0 0 | 0 0 | 0 0 | 29.94 |
| IPRO10690 | 0 | 67 0 0  | 0 0 | 0 0 | 0 0 | 0 0 | 0 0 | 25.62 |
| IPRO10691 | 0 | 65 0 0  | 0 0 | 0 0 | 0 0 | 0 0 | 0 0 | 81.28 |
| IPRO10692 | 0 | 7 0 0   | 0 0 | 0 0 | 0 0 | 0 0 | 0 0 | 95.97 |
| IPRO10695 | 0 | 23 0 0  | 0 0 | 0 0 | 0 0 | 0 0 | 0 0 | 58.05 |
| IPRO10696 | 0 | 70 0 0  | 0 0 | 0 0 | 0 0 | 0 0 | 0 0 | 63.5  |
| IPRO10697 | 0 | 103 0 0 | 0 0 | 0 0 | 0 0 | 0 0 | 0 0 | 46.25 |
| IPRO10701 | 0 | 53 0 0  | 0 0 | 0 0 | 0 0 | 0 0 | 0 0 | 29.22 |
| IPRO10702 | 0 | 26 0 0  | 0 0 | 0 0 | 0 0 | 0 0 | 0 0 | 52.83 |
| IPRO10706 | 0 | 43 0 0  | 0 0 | 0 0 | 0 0 | 0 0 | 0 0 | 46.32 |
| IPRO10711 | 0 | 32 0 0  | 0 0 | 0 0 | 0 0 | 0 0 | 0 0 | 47.94 |
| IPRO10736 | 0 | 666 0 0 | 0 0 | 0 0 | 111 | 0 0 | 0 0 | 36.51 |
| IPRO10738 | 0 | 32 0 0  | 0 0 | 0 0 | 0 0 | 0 0 | 0 0 | 40.74 |
| IPRO10739 | 0 | 92 0 0  | 0 0 | 0 0 | 0 0 | 0 0 | 0 0 | 23.66 |
| IPRO10740 | 0 | 8 0 0   | 0 0 | 0 0 | 0 0 | 0 0 | 0 0 | 67.08 |
| IPRO10749 | 0 | 90 0 0  | 0 0 | 0 0 | 0 0 | 0 0 | 0 0 | 57.71 |
| IPRO10751 | 0 | 29 0 0  | 0 0 | 0 0 | 0 0 | 0 0 | 0 0 | 26.2  |
| IPRO10765 | 0 | 66 0 0  | 0 0 | 0 0 | 0 0 | 0 0 | 0 0 | 31.55 |
| IPRO10771 | 0 | 63 0 0  | 0 0 | 0 0 | 0 0 | 0 0 | 0 0 | 72.74 |
| IPRO10773 | 0 | 41 0 0  | 0 0 | 0 0 | 0 0 | 0 0 | 0 0 | 36.54 |
| IPRO10774 | 0 | 55 0 0  | 0 0 | 0 0 | 0 0 | 0 0 | 0 0 | 46.03 |
| IPRO10777 | 0 | 16 0 0  | 0 0 | 0 0 | 0 0 | 0 0 | 0 0 | 83.49 |
| IPRO10793 | 0 | 55 0 0  | 0 0 | 0 0 | 0 0 | 0 0 | 0 0 | 19.9  |

|           |   |         |     |     |     |     |     |       |
|-----------|---|---------|-----|-----|-----|-----|-----|-------|
| IPRO10794 | 0 | 79 0 0  | 0 0 | 0 0 | 0 0 | 0 0 | 0 0 | 46.01 |
| IPRO10797 | 0 | 12 0 0  | 0 0 | 0 0 | 0 0 | 0 0 | 0 0 | 59.36 |
| IPRO10807 | 0 | 71 0 0  | 0 0 | 0 0 | 0 0 | 0 0 | 0 0 | 55.33 |
| IPRO10813 | 0 | 12 0 0  | 0 0 | 0 0 | 0 0 | 0 0 | 0 0 | 75.77 |
| IPRO10815 | 0 | 53 0 0  | 0 0 | 0 0 | 0 0 | 0 0 | 0 0 | 63.1  |
| IPRO10825 | 0 | 45 0 0  | 0 0 | 0 0 | 0 0 | 0 0 | 0 0 | 27.32 |
| IPRO10837 | 0 | 22 0 0  | 0 0 | 0 0 | 0 0 | 0 0 | 0 0 | 30.63 |
| IPRO10838 | 0 | 76 0 0  | 0 0 | 0 0 | 0 0 | 0 0 | 0 0 | 32.62 |
| IPRO10840 | 0 | 78 0 0  | 0 0 | 0 0 | 0 0 | 0 0 | 0 0 | 33.97 |
| IPRO10841 | 0 | 63 0 0  | 0 0 | 0 0 | 0 0 | 0 0 | 0 0 | 30.39 |
| IPRO10848 | 0 | 58 0 0  | 0 0 | 0 0 | 0 0 | 0 0 | 0 0 | 41.17 |
| IPRO10849 | 0 | 36 0 0  | 0 0 | 0 0 | 0 0 | 0 0 | 0 0 | 45.87 |
| IPRO10851 | 0 | 82 0 0  | 0 0 | 0 0 | 0 0 | 0 0 | 0 0 | 21.04 |
| IPRO10854 | 0 | 682 0 0 | 0 0 | 0 0 | 0 0 | 0 0 | 0 0 | 22.27 |
| IPRO10862 | 0 | 60 1 1  | 0 0 | 0 0 | 0 0 | 0 0 | 0 0 | 25.78 |
| IPRO10864 | 0 | 53 0 0  | 0 0 | 0 0 | 0 0 | 0 0 | 0 0 | 40.29 |
| IPRO10866 | 0 | 6 0 0   | 0 0 | 0 0 | 0 0 | 0 0 | 0 0 | 58.56 |
| IPRO10869 | 0 | 182 0 0 | 0 0 | 0 0 | 0 0 | 0 0 | 0 0 | 16.3  |
| IPRO10875 | 0 | 10 0 0  | 0 0 | 0 0 | 0 0 | 0 0 | 0 0 | 48.15 |
| IPRO10886 | 0 | 16 0 0  | 0 0 | 0 0 | 0 0 | 0 0 | 0 0 | 39.37 |
| IPRO10888 | 0 | 22 0 0  | 0 0 | 0 0 | 0 0 | 0 0 | 0 0 | 46.34 |
| IPRO10890 | 0 | 105 0 0 | 0 0 | 0 0 | 0 0 | 0 0 | 0 0 | 32.56 |
| IPRO10899 | 0 | 55 0 0  | 0 0 | 0 0 | 0 0 | 0 0 | 0 0 | 37.48 |
| IPRO10900 | 0 | 9 0 0   | 0 0 | 0 0 | 0 0 | 0 0 | 0 0 | 71.84 |
| IPRO10938 | 0 | 61 0 0  | 0 0 | 0 0 | 0 0 | 0 0 | 0 0 | 69.33 |
| IPRO11088 | 0 | 37 0 0  | 0 0 | 0 0 | 0 0 | 0 0 | 0 0 | 38.29 |
| IPRO11092 | 0 | 65 0 0  | 0 0 | 0 0 | 0 0 | 0 0 | 0 0 | 52.97 |
| IPRO11101 | 0 | 124 0 0 | 0 0 | 0 0 | 0 0 | 0 0 | 0 0 | 36.83 |
| IPRO11122 | 0 | 14 0 0  | 0 0 | 0 0 | 0 0 | 0 0 | 0 0 | 26.47 |
| IPRO11152 | 0 | 11 0 0  | 0 0 | 0 0 | 0 0 | 0 0 | 0 0 | 23.02 |
| IPRO11179 | 0 | 7 0 0   | 0 0 | 0 0 | 0 0 | 0 0 | 0 0 | 35.01 |
| IPRO11186 | 0 | 8 0 0   | 0 0 | 0 0 | 0 0 | 0 0 | 0 0 | 31.06 |
| IPRO11194 | 0 | 71 0 0  | 0 0 | 0 0 | 0 0 | 0 0 | 0 0 | 60.72 |
| IPRO11199 | 0 | 89 0 0  | 0 0 | 0 0 | 0 0 | 0 0 | 0 0 | 24.48 |
| IPRO11200 | 0 | 66 0 0  | 0 0 | 0 0 | 0 0 | 0 0 | 0 0 | 23.77 |
| IPRO11201 | 0 | 89 0 0  | 0 0 | 0 0 | 0 0 | 0 0 | 0 0 | 43.56 |
| IPRO11204 | 0 | 103 0 0 | 0 0 | 0 0 | 0 0 | 0 0 | 0 0 | 45.71 |
| IPRO11206 | 0 | 31 0 0  | 0 0 | 0 0 | 0 0 | 0 0 | 0 0 | 41.19 |
| IPRO11213 | 0 | 56 0 0  | 0 0 | 0 0 | 0 0 | 0 0 | 0 0 | 51.35 |
| IPRO11217 | 0 | 18 0 0  | 0 0 | 0 0 | 0 0 | 0 0 | 0 0 | 31.66 |
| IPRO11220 | 0 | 38 0 0  | 0 0 | 0 0 | 0 0 | 0 0 | 0 0 | 30.3  |
| IPRO11223 | 0 | 97 0 0  | 0 0 | 0 0 | 0 0 | 0 0 | 0 0 | 68.8  |
| IPRO11224 | 0 | 5 0 0   | 0 0 | 0 0 | 0 0 | 0 0 | 0 0 | 85.9  |
| IPRO11225 | 0 | 21 0 0  | 0 0 | 0 0 | 0 0 | 0 0 | 0 0 | 44.65 |
| IPRO11228 | 0 | 38 0 0  | 0 0 | 0 0 | 0 0 | 0 0 | 0 0 | 37.90 |
| IPRO11231 | 0 | 59 0 0  | 0 0 | 0 0 | 0 0 | 0 0 | 0 0 | 29.85 |
| IPRO11233 | 0 | 12 0 0  | 0 0 | 0 0 | 0 0 | 0 0 | 0 0 | 74.35 |
| IPRO11313 | 0 | 10 0 0  | 0 0 | 0 0 | 0 0 | 0 0 | 0 0 | 54.1  |
| IPRO11314 | 0 | 9 0 0   | 0 0 | 0 0 | 0 0 | 0 0 | 0 0 | 63.71 |
| IPRO11317 | 0 | 10 0 0  | 0 0 | 0 0 | 0 0 | 0 0 | 0 0 | 54.98 |
| IPRO11385 | 0 | 72 0 0  | 0 0 | 0 0 | 0 0 | 0 0 | 0 0 | 30.95 |
| IPRO11394 | 0 | 38 0 0  | 0 0 | 0 0 | 0 0 | 0 0 | 0 0 | 43.8  |
| IPRO11396 | 0 | 40 0 0  | 0 0 | 0 0 | 0 0 | 0 0 | 0 0 | 41.11 |
| IPRO11397 | 0 | 83 0 0  | 0 0 | 0 0 | 0 0 | 0 0 | 0 0 | 24.05 |
| IPRO11400 | 0 | 6 0 0   | 0 0 | 0 0 | 0 0 | 0 0 | 0 0 | 6.26  |
| IPRO11428 | 0 | 49 0 0  | 0 0 | 0 0 | 0 0 | 0 0 | 0 0 | 45.59 |
| IPRO11431 | 0 | 27 0 0  | 0 0 | 0 0 | 0 0 | 0 0 | 0 0 | 30.8  |
| IPRO11435 | 0 | 104 0 0 | 0 0 | 0 0 | 0 0 | 0 0 | 0 0 | 38.44 |
| IPRO11437 | 0 | 137 0 0 | 0 0 | 0 0 | 0 0 | 0 0 | 0 0 | 33.02 |
| IPRO11438 | 0 | 42 0 0  | 0 0 | 0 0 | 0 0 | 0 0 | 0 0 | 52.47 |
| IPRO11440 | 0 | 88 0 0  | 0 0 | 0 0 | 0 0 | 0 0 | 0 0 | 25.71 |
| IPRO11443 | 0 | 19 0 0  | 0 0 | 0 0 | 0 0 | 0 0 | 0 0 | 42.36 |
| IPRO11455 | 0 | 20 0 0  | 0 0 | 0 0 | 0 0 | 0 0 | 0 0 | 54.29 |
| IPRO11463 | 0 | 57 0 0  | 0 0 | 0 0 | 0 0 | 0 0 | 0 0 | 19.42 |
| IPRO11466 | 0 | 43 0 0  | 0 0 | 0 0 | 0 0 | 0 0 | 0 0 | 37.83 |
| IPRO11468 | 0 | 29 0 0  | 0 0 | 0 0 | 0 0 | 0 0 | 0 0 | 16.16 |
| IPRO11470 | 0 | 26 0 0  | 0 0 | 0 0 | 0 0 | 0 0 | 0 0 | 34.23 |
| IPRO11471 | 0 | 18 0 0  | 0 0 | 0 0 | 0 0 | 0 0 | 0 0 | 24.54 |
| IPRO11473 | 0 | 27 0 0  | 0 0 | 0 0 | 0 0 | 0 0 | 0 0 | 25.66 |
| IPRO11502 | 0 | 106 0 0 | 0 0 | 0 0 | 0 0 | 0 0 | 0 0 | 17.35 |
| IPRO11566 | 0 | 225 0 0 | 0 0 | 0 0 | 0 0 | 0 0 | 0 0 | 30.22 |
| IPRO11630 | 0 | 46 0 0  | 0 0 | 0 0 | 0 0 | 0 0 | 0 0 | 42.25 |
| IPRO11648 | 0 | 24 0 0  | 0 0 | 0 0 | 0 0 | 0 0 | 0 0 | 42.83 |
| IPRO11660 | 0 | 83 0 0  | 0 0 | 0 0 | 0 0 | 0 0 | 0 0 | 20.48 |
| IPRO11668 | 0 | 71 0 0  | 0 0 | 0 0 | 0 0 | 0 0 | 0 0 | 49.16 |
| IPRO11669 | 0 | 87 0 0  | 0 0 | 0 0 | 0 0 | 0 0 | 0 0 | 27.5  |
| IPRO11675 | 0 | 14 0 0  | 0 0 | 0 0 | 0 0 | 0 0 | 0 0 | 66.35 |
| IPRO11688 | 0 | 29 0 0  | 0 0 | 0 0 | 0 0 | 0 0 | 0 0 | 49.24 |
| IPRO11690 | 0 | 230 0 0 | 0 0 | 0 0 | 0 0 | 0 0 | 0 0 | 61.14 |
| IPRO11718 | 0 | 85 0 0  | 0 0 | 0 0 | 0 0 | 0 0 | 0 0 | 55.08 |
| IPRO11719 | 0 | 49 0 0  | 0 0 | 0 0 | 0 0 | 0 0 | 0 0 | 39.5  |
| IPRO11720 | 0 | 31 0 0  | 0 0 | 0 0 | 0 0 | 0 0 | 0 0 | 77.49 |
| IPRO11726 | 0 | 109 0 0 | 0 0 | 0 0 | 0 0 | 0 0 | 0 0 | 34.38 |
| IPRO11728 | 0 | 14 0 0  | 0 0 | 0 0 | 0 0 | 0 0 | 0 0 | 95.53 |
| IPRO11733 | 0 | 87 0 0  | 0 0 | 0 0 | 0 0 | 0 0 | 0 0 | 24.58 |
| IPRO11735 | 0 | 16 0 0  | 0 0 | 0 0 | 0 0 | 0 0 | 0 0 | 45.19 |
| IPRO11737 | 0 | 88 0 0  | 0 0 | 0 0 | 0 0 | 0 0 | 0 0 | 18.36 |
| IPRO11740 | 0 | 84 0 0  | 0 0 | 0 0 | 0 0 | 0 0 | 0 0 | 30.52 |
| IPRO11751 | 0 | 24 0 0  | 0 0 | 0 0 | 0 0 | 0 0 | 0 0 | 15.26 |
| IPRO11754 | 0 | 12 0 0  | 0 0 | 0 0 | 0 0 | 0 0 | 0 0 | 14.49 |
| IPRO11846 | 0 | 87 0 0  | 0 0 | 0 0 | 0 0 | 0 0 | 0 0 | 52.89 |
| IPRO12015 | 0 | 7 0 0   | 0 0 | 0 0 | 0 0 | 0 0 | 0 0 | 51.01 |
| IPRO12020 | 0 | 62 0 0  | 0 0 | 0 0 | 0 0 | 0 0 | 0 0 | 14.76 |
| IPRO12021 | 0 | 8 0 0   | 0 0 | 0 0 | 0 0 | 0 0 | 0 0 | 56.9  |
| IPRO12031 | 0 | 19 0 0  | 0 0 | 0 0 | 0 0 | 0 0 | 0 0 | 40.47 |
| IPRO12033 | 0 | 15 0 0  | 0 0 | 0 0 | 0 0 | 0 0 | 0 0 | 40.76 |
| IPRO12036 | 0 | 7 0 0   | 0 0 | 0 0 | 0 0 | 0 0 | 0 0 | 43.28 |
| IPRO12037 | 0 | 57 0 0  | 0 0 | 0 0 | 0 0 | 0 0 | 0 0 | 36.56 |
| IPRO12041 | 0 | 22 0 0  | 0 0 | 0 0 | 0 0 | 0 0 | 0 0 | 30.98 |
| IPRO12042 | 0 | 18 0 0  | 0 0 | 0 0 | 0 0 | 0 0 | 0 0 | 29.76 |
| IPRO12043 | 0 | 5 0 0   | 0 0 | 0 0 | 0 0 | 0 0 | 0 0 | 35.69 |
| IPRO12080 | 0 | 3 0 0   | 0 0 | 0 0 | 0 0 | 0 0 | 0 0 | 75.05 |
| IPRO12089 | 0 | 7 0 0   | 0 0 | 0 0 | 0 0 | 0 0 | 0 0 | 26.83 |
| IPRO12093 | 0 | 3 0 0   | 0 0 | 0 0 | 0 0 | 0 0 | 0 0 | 100   |
| IPRO12096 | 0 | 3 0 0   | 0 0 | 0 0 | 0 0 | 0 0 | 0 0 | 59.39 |
| IPRO12097 | 0 | 6 0 0   | 0 0 | 0 0 | 0 0 | 0 0 | 0 0 | 53.41 |
| IPRO12101 | 0 | 4 0 0   | 0 0 | 0 0 | 0 0 | 0 0 | 0 0 | 46.94 |
| IPRO12134 | 0 | 29 0 0  | 0 0 | 0 0 | 0 0 | 0 0 | 0 0 | 39.47 |
| IPRO12138 | 0 | 4 0 0   | 0 0 | 0 0 | 0 0 | 0 0 | 0 0 | 71.03 |
| IPRO12190 | 0 | 23 0 0  | 0 0 | 0 0 | 0 0 | 0 0 | 0 0 | 71.84 |
| IPRO12206 | 0 | 175 0 0 | 0 0 | 0 0 | 0 0 | 0 0 | 0 0 | 48.58 |
| IPRO12354 | 0 | 47 0 0  | 0 0 | 0 0 | 0 0 | 0 0 | 0 0 | 25.78 |
| IPRO12355 | 0 | 3 0 0   | 0 0 | 0 0 | 0 0 | 0 0 | 0 0 | 83.97 |
| IPRO12356 | 0 | 19 0 0  | 0 0 | 0 0 | 0 0 | 0 0 | 0 0 | 57.51 |
| IPRO12361 | 0 | 23 0 0  | 0 0 | 0 0 | 0 0 | 0 0 | 0 0 | 60.26 |
| IPRO12366 | 0 | 28 0 0  | 0 0 | 0 0 | 0 0 | 0 0 | 0 0 | 43.25 |
| IPRO12371 | 0 | 5 0 0   | 0 0 | 0 0 | 0 0 | 0 0 | 0 0 | 57.52 |
| IPRO12372 | 0 | 8 0 0   | 0 0 | 0 0 | 0 0 | 0 0 | 0 0 | 86.1  |
| IPRO12381 | 0 | 3 0 0   | 0 0 | 0 0 | 0 0 | 0 0 | 0 0 | 100   |
| IPRO12397 | 0 | 6 0 0   | 0 0 | 0 0 | 0 0 | 0 0 | 0 0 | 37.65 |
| IPRO12420 | 0 | 29 0 0  | 0 0 | 0 0 | 0 0 | 0 0 | 0 0 | 36.63 |
| IPRO12422 | 0 | 62 0 0  | 0 0 | 0 0 | 0 0 | 0 0 | 0 0 | 30.33 |
| IPRO12443 | 0 | 18 0 0  | 0 0 | 0 0 | 0 0 | 0 0 | 0 0 | 45.49 |
| IPRO12447 | 0 | 94 0 0  | 0 0 | 0 0 | 0 0 | 0 0 | 0 0 | 17.13 |
| IPRO12449 | 0 | 27 0 0  | 0 0 | 0 0 | 0 0 | 0 0 | 0 0 | 38.96 |
| IPRO12451 | 0 | 255 0 0 | 0 0 | 0 0 | 0 0 | 0 0 | 0 0 | 25.43 |
| IPRO12453 | 0 | 53 0 0  | 0 0 | 0 0 | 0 0 | 0 0 | 0 0 | 40.52 |
| IPRO12469 | 0 | 67 0 0  | 0 0 | 0 0 | 0 0 | 0 0 | 0 0 | 46.28 |
| IPRO12475 | 0 | 10 0 0  | 0 0 | 0 0 | 0 0 | 0 0 | 0 0 | 22.01 |
| IPRO12477 | 0 | 20 0 0  | 0 0 | 0 0 | 0 0 | 0 0 | 0 0 | 21.91 |
| IPRO12485 | 0 | 33 0 0  | 0 0 | 0 0 | 0 0 | 0 0 | 0 0 | 35.59 |
| IPRO12489 | 0 | 12 0 0  | 0 0 | 0 0 | 0 0 | 0 0 | 0 0 | 36.93 |
| IPRO12508 | 0 | 7 0 0   | 0 0 | 0 0 | 0 0 | 0 0 | 0 0 | 100   |
| IPRO12513 | 0 | 13 0 0  | 0 0 | 0 0 | 0 0 | 0 0 | 0 0 | 64.29 |
| IPRO12535 | 0 | 42 0 0  | 0 0 | 0 0 | 0 0 | 0 0 | 0 0 | 30.58 |
| IPRO12543 | 0 | 83 0 0  | 0 0 | 0 0 | 0 0 | 0 0 | 0 0 | 25.02 |
| IPRO12545 | 0 | 151 0 0 | 0 0 | 0 0 | 0 0 | 0 0 | 0 0 | 21.62 |
| IPRO12546 | 0 | 14 0 0  | 0 0 | 0 0 | 0 0 | 0 0 | 0 0 | 60.83 |
| IPRO12550 | 0 | 74 0 0  | 0 0 | 0 0 | 0 0 | 0 0 | 0 0 | 29.55 |
| IPRO12554 | 0 | 4 0 0   | 0 0 | 0 0 | 0 0 | 0 0 | 0 0 | 49.15 |
| IPRO12563 | 0 | 44 0 0  | 0 0 | 0 0 | 0 0 | 0 0 | 0 0 | 72.14 |
| IPRO12565 | 0 | 20 0 0  | 0 0 | 0 0 | 0 0 | 0 0 | 0 0 | 97.54 |
| IPRO12566 | 0 | 30 0 0  | 0 0 | 0 0 | 0 0 | 0 0 | 0 0 | 75.54 |
| IPRO12567 | 0 | 23 0 0  | 0 0 | 0 0 | 0 0 | 0 0 | 0 0 | 95.15 |
| IPRO12570 | 0 | 26 0 0  | 0 0 | 0 0 | 0 0 | 0 0 | 0 0 | 81.9  |
| IPRO12571 | 0 | 36 0 0  | 0 0 | 0 0 | 0 0 | 0 0 | 0 0 | 50.73 |
| IPRO12574 | 0 | 7 0 0   | 0 0 | 0 0 | 0 0 | 0 0 | 0 0 | 69.28 |

|           |   |         |     |     |     |     |     |       |
|-----------|---|---------|-----|-----|-----|-----|-----|-------|
| IPR012575 | 0 | 21 0 0  | 0 0 | 0 0 | 0 0 | 0 0 | 0 0 | 49.72 |
| IPR012576 | 0 | 52 0 0  | 0 0 | 0 0 | 0 0 | 0 0 | 0 0 | 34.13 |
| IPR012589 | 0 | 8 0 0   | 0 0 | 0 0 | 0 0 | 0 0 | 0 0 | 62.18 |
| IPR012595 | 0 | 43 0 0  | 0 0 | 0 0 | 0 0 | 0 0 | 0 0 | 45.03 |
| IPR012596 | 0 | 3 0 0   | 0 0 | 0 0 | 0 0 | 0 0 | 0 0 | 46.14 |
| IPR012602 | 0 | 25 0 0  | 0 0 | 0 0 | 0 0 | 0 0 | 0 0 | 94.07 |
| IPR012605 | 0 | 6 0 0   | 0 0 | 0 0 | 0 0 | 0 0 | 0 0 | 47.18 |
| IPR012607 | 0 | 30 0 0  | 0 0 | 0 0 | 0 0 | 0 0 | 0 0 | 86.71 |
| IPR012608 | 0 | 9 0 0   | 0 0 | 0 0 | 0 0 | 0 0 | 0 0 | 63.45 |
| IPR012609 | 0 | 11 0 0  | 0 0 | 0 0 | 0 0 | 0 0 | 0 0 | 64.54 |
| IPR012610 | 0 | 69 0 0  | 0 0 | 0 0 | 0 0 | 0 0 | 0 0 | 36.21 |
| IPR012611 | 0 | 21 0 0  | 0 0 | 0 0 | 0 0 | 0 0 | 0 0 | 66.72 |
| IPR012612 | 0 | 19 0 0  | 0 0 | 0 0 | 0 0 | 0 0 | 0 0 | 69.16 |
| IPR012614 | 0 | 19 0 0  | 0 0 | 0 0 | 0 0 | 0 0 | 0 0 | 71.22 |
| IPR012620 | 0 | 18 0 0  | 0 0 | 0 0 | 0 0 | 0 0 | 0 0 | 100   |
| IPR012639 | 0 | 6 0 0   | 0 0 | 0 0 | 0 0 | 0 0 | 0 0 | 81.57 |
| IPR012651 | 0 | 119 0 0 | 0 0 | 0 0 | 0 0 | 0 0 | 0 0 | 26.59 |
| IPR012655 | 0 | 64 0 0  | 0 0 | 0 0 | 0 0 | 0 0 | 0 0 | 47.5  |
| IPR012657 | 0 | 5 0 0   | 0 0 | 0 0 | 0 0 | 0 0 | 0 0 | 27.99 |
| IPR012658 | 0 | 125 0 0 | 0 0 | 0 0 | 0 0 | 0 0 | 0 0 | 49.93 |
| IPR012661 | 0 | 85 0 0  | 0 0 | 0 0 | 0 0 | 0 0 | 0 0 | 37.13 |
| IPR012667 | 0 | 53 0 0  | 0 0 | 0 0 | 0 0 | 0 0 | 0 0 | 33.85 |
| IPR012672 | 0 | 11 0 0  | 0 0 | 0 0 | 0 0 | 0 0 | 0 0 | 51.31 |
| IPR012711 | 0 | 14 0 0  | 0 0 | 0 0 | 0 0 | 0 0 | 0 0 | 48    |
| IPR012765 | 0 | 21 0 0  | 0 0 | 0 0 | 0 0 | 0 0 | 0 0 | 51.2  |
| IPR012808 | 0 | 136 0 0 | 0 0 | 0 0 | 0 0 | 0 0 | 0 0 | 23.77 |
| IPR012823 | 0 | 304 0 0 | 0 0 | 0 0 | 0 0 | 0 0 | 0 0 | 11.03 |
| IPR012837 | 0 | 161 0 0 | 0 0 | 0 0 | 0 0 | 0 0 | 0 0 | 54.18 |
| IPR012863 | 0 | 49 0 0  | 0 0 | 0 0 | 0 0 | 0 0 | 0 0 | 34.07 |
| IPR012864 | 0 | 98 0 0  | 0 0 | 11  | 0 0 | 0 0 | 0 0 | 33.09 |
| IPR012875 | 0 | 161 0 0 | 0 0 | 0 0 | 0 0 | 0 0 | 0 0 | 36.21 |
| IPR012879 | 0 | 79 0 0  | 0 0 | 0 0 | 0 0 | 0 0 | 0 0 | 26.75 |
| IPR012884 | 0 | 36 0 0  | 0 0 | 0 0 | 0 0 | 0 0 | 0 0 | 30.22 |
| IPR012892 | 0 | 28 0 0  | 0 0 | 0 0 | 0 0 | 0 0 | 0 0 | 35.18 |
| IPR012905 | 0 | 3 0 0   | 0 0 | 0 0 | 0 0 | 0 0 | 0 0 | 100   |
| IPR012917 | 0 | 6 0 0   | 0 0 | 0 0 | 0 0 | 0 0 | 0 0 | 43.48 |
| IPR012922 | 0 | 23 1 1  | 0 0 | 0 0 | 0 0 | 0 0 | 0 0 | 46.14 |
| IPR012930 | 0 | 30 0 0  | 0 0 | 0 0 | 0 0 | 0 0 | 0 0 | 36.22 |
| IPR012962 | 0 | 76 0 0  | 0 0 | 0 0 | 0 0 | 0 0 | 0 0 | 25.74 |
| IPR012964 | 0 | 22 0 0  | 0 0 | 0 0 | 0 0 | 0 0 | 0 0 | 37.98 |
| IPR012991 | 0 | 113 0 0 | 0 0 | 0 0 | 0 0 | 0 0 | 0 0 | 11.49 |
| IPR012994 | 0 | 177 0 0 | 0 0 | 0 0 | 0 0 | 0 0 | 0 0 | 61.94 |
| IPR013014 | 0 | 6 0 0   | 0 0 | 0 0 | 0 0 | 0 0 | 0 0 | 64.05 |
| IPR013055 | 0 | 15 0 0  | 0 0 | 0 0 | 0 0 | 0 0 | 0 0 | 67.66 |
| IPR013110 | 0 | 85 0 0  | 0 0 | 0 0 | 0 0 | 0 0 | 0 0 | 27.37 |
| IPR013161 | 0 | 6 0 0   | 0 0 | 0 0 | 0 0 | 0 0 | 0 0 | 53.58 |
| IPR013169 | 0 | 64 0 0  | 0 0 | 0 0 | 0 0 | 0 0 | 0 0 | 31.97 |
| IPR013172 | 0 | 92 0 0  | 0 0 | 0 0 | 0 0 | 0 0 | 0 0 | 45.34 |
| IPR013176 | 0 | 57 0 0  | 0 0 | 0 0 | 0 0 | 0 0 | 0 0 | 13.54 |
| IPR013205 | 0 | 18 0 0  | 0 0 | 0 0 | 0 0 | 0 0 | 0 0 | 80.18 |
| IPR013248 | 0 | 31 0 0  | 0 0 | 0 0 | 0 0 | 0 0 | 0 0 | 41.07 |
| IPR013251 | 0 | 29 0 0  | 0 0 | 0 0 | 0 0 | 0 0 | 0 0 | 43.37 |
| IPR013252 | 0 | 38 0 0  | 0 0 | 0 0 | 0 0 | 0 0 | 0 0 | 34.46 |
| IPR013294 | 0 | 9 0 0   | 0 0 | 0 0 | 0 0 | 0 0 | 0 0 | 74.42 |
| IPR013348 | 0 | 11 0 0  | 0 0 | 0 0 | 0 0 | 0 0 | 0 0 | 61.9  |
| IPR013365 | 0 | 8 0 0   | 0 0 | 0 0 | 0 0 | 0 0 | 0 0 | 57.97 |
| IPR013372 | 0 | 4 0 0   | 0 0 | 0 0 | 0 0 | 0 0 | 0 0 | 94.94 |
| IPR013388 | 0 | 32 0 0  | 0 0 | 0 0 | 0 0 | 0 0 | 0 0 | 32.19 |
| IPR013389 | 0 | 35 0 0  | 0 0 | 0 0 | 0 0 | 0 0 | 0 0 | 11.96 |
| IPR013391 | 0 | 19 0 0  | 0 0 | 0 0 | 0 0 | 0 0 | 0 0 | 35.33 |
| IPR013392 | 0 | 19 0 0  | 0 0 | 0 0 | 0 0 | 0 0 | 0 0 | 28.62 |
| IPR013393 | 0 | 18 0 0  | 0 0 | 0 0 | 0 0 | 0 0 | 0 0 | 30.65 |
| IPR013394 | 0 | 36 0 0  | 0 0 | 0 0 | 0 0 | 0 0 | 0 0 | 19.97 |
| IPR013396 | 0 | 51 0 0  | 0 0 | 0 0 | 0 0 | 0 0 | 0 0 | 29.32 |
| IPR013398 | 0 | 47 0 0  | 0 0 | 0 0 | 0 0 | 0 0 | 0 0 | 31.77 |
| IPR013399 | 0 | 47 0 0  | 0 0 | 0 0 | 0 0 | 0 0 | 0 0 | 49.74 |
| IPR013417 | 0 | 15 0 0  | 0 0 | 0 0 | 0 0 | 0 0 | 0 0 | 28.47 |
| IPR013446 | 0 | 6 0 0   | 0 0 | 0 0 | 0 0 | 0 0 | 0 0 | 63.21 |
| IPR013472 | 0 | 21 0 0  | 0 0 | 0 0 | 0 0 | 0 0 | 0 0 | 68.28 |
| IPR013481 | 0 | 51 0 0  | 0 0 | 0 0 | 0 0 | 0 0 | 0 0 | 39.84 |
| IPR013493 | 0 | 35 0 0  | 0 0 | 0 0 | 0 0 | 0 0 | 0 0 | 18.6  |
| IPR013494 | 0 | 35 0 0  | 0 0 | 0 0 | 0 0 | 0 0 | 0 0 | 18.65 |
| IPR013514 | 0 | 4 0 0   | 0 0 | 0 0 | 0 0 | 0 0 | 0 0 | 57.7  |
| IPR013655 | 0 | 30 0 0  | 0 0 | 0 0 | 0 0 | 0 0 | 0 0 | 49.3  |
| IPR013640 | 0 | 28 0 0  | 0 0 | 0 0 | 0 0 | 0 0 | 0 0 | 41.11 |
| IPR013712 | 0 | 4 0 0   | 0 0 | 0 0 | 0 0 | 0 0 | 0 0 | 39.38 |
| IPR013726 | 0 | 20 0 0  | 0 0 | 0 0 | 0 0 | 0 0 | 0 0 | 39.77 |
| IPR013743 | 0 | 5 0 0   | 0 0 | 0 0 | 0 0 | 0 0 | 0 0 | 42.81 |
| IPR013744 | 0 | 60 0 0  | 0 0 | 0 0 | 0 0 | 0 0 | 0 0 | 31.08 |
| IPR013837 | 0 | 5 0 0   | 0 0 | 0 0 | 0 0 | 0 0 | 0 0 | 65.34 |
| IPR013862 | 0 | 27 0 0  | 0 0 | 0 0 | 0 0 | 0 0 | 0 0 | 37.53 |
| IPR013869 | 0 | 10 0 0  | 0 0 | 0 0 | 0 0 | 0 0 | 0 0 | 18.05 |
| IPR013875 | 0 | 29 0 0  | 0 0 | 0 0 | 0 0 | 0 0 | 0 0 | 46.88 |
| IPR013883 | 0 | 67 0 0  | 0 0 | 0 0 | 0 0 | 0 0 | 0 0 | 25.13 |
| IPR013885 | 0 | 23 0 0  | 0 0 | 0 0 | 0 0 | 0 0 | 0 0 | 27.41 |
| IPR013901 | 0 | 78 0 0  | 0 0 | 0 0 | 0 0 | 0 0 | 0 0 | 10.96 |
| IPR013906 | 0 | 86 0 0  | 0 0 | 0 0 | 0 0 | 0 0 | 0 0 | 28.08 |
| IPR013907 | 0 | 132 0 0 | 0 0 | 0 0 | 0 0 | 0 0 | 0 0 | 18.05 |
| IPR013911 | 0 | 6 0 0   | 0 0 | 0 0 | 0 0 | 0 0 | 0 0 | 31.69 |
| IPR013921 | 0 | 61 0 0  | 0 0 | 0 0 | 0 0 | 0 0 | 0 0 | 23.29 |
| IPR013948 | 0 | 34 0 0  | 0 0 | 0 0 | 0 0 | 0 0 | 0 0 | 23.69 |
| IPR013963 | 0 | 23 0 0  | 0 0 | 0 0 | 0 0 | 0 0 | 0 0 | 46.58 |
| IPR013965 | 0 | 24 0 0  | 0 0 | 0 0 | 0 0 | 0 0 | 0 0 | 50.44 |
| IPR013966 | 0 | 28 0 0  | 0 0 | 0 0 | 0 0 | 0 0 | 0 0 | 37.35 |
| IPR014074 | 0 | 30 0 0  | 0 0 | 0 0 | 0 0 | 0 0 | 0 0 | 51.7  |
| IPR014086 | 0 | 25 0 0  | 0 0 | 0 0 | 0 0 | 0 0 | 0 0 | 45.52 |
| IPR014118 | 0 | 74 0 0  | 0 0 | 0 0 | 0 0 | 0 0 | 0 0 | 15.04 |
| IPR014174 | 0 | 16 0 0  | 0 0 | 0 0 | 0 0 | 0 0 | 0 0 | 27.04 |
| IPR014175 | 0 | 11 0 0  | 0 0 | 0 0 | 0 0 | 0 0 | 0 0 | 62.53 |
| IPR014189 | 0 | 12 0 0  | 0 0 | 0 0 | 0 0 | 0 0 | 0 0 | 32.4  |
| IPR014198 | 0 | 65 0 0  | 0 0 | 0 0 | 0 0 | 0 0 | 0 0 | 29.5  |
| IPR014201 | 0 | 65 0 0  | 0 0 | 0 0 | 0 0 | 0 0 | 0 0 | 63.87 |
| IPR014220 | 0 | 3 0 0   | 0 0 | 0 0 | 0 0 | 0 0 | 0 0 | 60.95 |
| IPR014245 | 0 | 71 0 0  | 0 0 | 0 0 | 0 0 | 0 0 | 0 0 | 18.33 |
| IPR014271 | 0 | 14 0 0  | 0 0 | 0 0 | 0 0 | 0 0 | 0 0 | 72.39 |
| IPR014287 | 0 | 20 0 0  | 0 0 | 0 0 | 0 0 | 0 0 | 0 0 | 26.15 |
| IPR014318 | 0 | 60 0 0  | 0 0 | 0 0 | 0 0 | 0 0 | 0 0 | 74.67 |
| IPR014358 | 0 | 78 0 0  | 0 0 | 0 0 | 0 0 | 0 0 | 0 0 | 34.65 |
| IPR014367 | 0 | 3 0 0   | 0 0 | 0 0 | 0 0 | 0 0 | 0 0 | 87.36 |
| IPR014368 | 0 | 25 0 0  | 0 0 | 0 0 | 0 0 | 0 0 | 0 0 | 59.54 |
| IPR014417 | 0 | 5 0 0   | 0 0 | 0 0 | 0 0 | 0 0 | 0 0 | 100   |
| IPR014424 | 0 | 12 0 0  | 0 0 | 0 0 | 0 0 | 0 0 | 0 0 | 38.88 |
| IPR014426 | 0 | 11 0 0  | 0 0 | 0 0 | 0 0 | 0 0 | 0 0 | 41.73 |
| IPR014447 | 0 | 41 0 0  | 0 0 | 0 0 | 0 0 | 0 0 | 0 0 | 73.07 |
| IPR014448 | 0 | 15 0 0  | 0 0 | 0 0 | 0 0 | 0 0 | 0 0 | 74.01 |
| IPR014450 | 0 | 17 0 0  | 0 0 | 0 0 | 0 0 | 0 0 | 0 0 | 52.75 |
| IPR014456 | 0 | 30 0 0  | 0 0 | 0 0 | 0 0 | 0 0 | 0 0 | 37.98 |
| IPR014464 | 0 | 178 0 0 | 0 0 | 0 0 | 0 0 | 0 0 | 0 0 | 29.74 |
| IPR014468 | 0 | 3 0 0   | 0 0 | 0 0 | 0 0 | 0 0 | 0 0 | 25.61 |
| IPR014478 | 0 | 3 0 0   | 0 0 | 0 0 | 0 0 | 0 0 | 0 0 | 94.33 |
| IPR014487 | 0 | 54 0 0  | 0 0 | 0 0 | 0 0 | 0 0 | 0 0 | 56.95 |
| IPR014491 | 0 | 36 0 0  | 0 0 | 0 0 | 0 0 | 0 0 | 0 0 | 87.25 |
| IPR014500 | 0 | 6 0 0   | 0 0 | 0 0 | 0 0 | 0 0 | 0 0 | 41.08 |
| IPR014508 | 0 | 58 0 0  | 0 0 | 0 0 | 0 0 | 0 0 | 0 0 | 39.29 |
| IPR014515 | 0 | 8 0 0   | 0 0 | 0 0 | 0 0 | 0 0 | 0 0 | 39.61 |
| IPR014517 | 0 | 8 0 0   | 0 0 | 0 0 | 0 0 | 0 0 | 0 0 | 49.24 |
| IPR014518 | 0 | 15 0 0  | 0 0 | 0 0 | 0 0 | 0 0 | 0 0 | 36.2  |
| IPR014540 | 0 | 5 0 0   | 0 0 | 0 0 | 0 0 | 0 0 | 0 0 | 69.98 |
| IPR014541 | 0 | 43 0 0  | 0 0 | 0 0 | 0 0 | 0 0 | 0 0 | 40.37 |
| IPR014548 | 0 | 5 0 0   | 0 0 | 0 0 | 0 0 | 0 0 | 0 0 | 32.72 |
| IPR014550 | 0 | 155 0 0 | 0 0 | 0 0 | 0 0 | 0 0 | 0 0 | 21.39 |
| IPR014553 | 0 | 48 0 0  | 0 0 | 0 0 | 0 0 | 0 0 | 0 0 | 38.55 |
| IPR014555 | 0 | 93 0 0  | 0 0 | 0 0 | 0 0 | 0 0 | 0 0 | 26.71 |
| IPR014556 | 0 | 16 0 0  | 0 0 | 0 0 | 0 0 | 0 0 | 0 0 | 25.79 |
| IPR014557 | 0 | 7 0 0   | 0 0 | 0 0 | 0 0 | 0 0 | 0 0 | 39.44 |
| IPR014562 | 0 | 17 0 0  | 0 0 | 0 0 | 0 0 | 0 0 | 0 0 | 30.85 |
| IPR014570 | 0 | 8 0 0   | 0 0 | 0 0 | 0 0 | 0 0 | 0 0 | 72    |
| IPR014573 | 0 | 7 0 0   | 0 0 | 0 0 | 0 0 | 0 0 | 0 0 | 99.73 |
| IPR014574 | 0 | 7 0 0   | 0 0 | 0 0 | 0 0 | 0 0 | 0 0 | 97.98 |
| IPR014580 | 0 | 69 0 0  | 0 0 | 0 0 | 0 0 | 0 0 | 0 0 | 58.95 |
| IPR014582 | 0 | 52 0 0  | 0 0 | 0 0 | 0 0 | 0 0 | 0 0 | 26.59 |
| IPR014583 | 0 | 6 0 0   | 0 0 | 0 0 | 0 0 | 0 0 | 0 0 | 52.93 |
| IPR014584 | 0 | 15 0 0  | 0 0 | 0 0 | 0 0 | 0 0 | 0 0 | 43.97 |
| IPR014587 | 0 | 13 0 0  | 0 0 | 0 0 | 0 0 | 0 0 | 0 0 | 31.63 |
| IPR014592 | 0 | 4 0 0   | 0 0 | 0 0 | 0 0 | 0 0 | 0 0 | 20.14 |
| IPR014593 | 0 | 4 0 0   | 0 0 | 0 0 | 0 0 | 0 0 | 0 0 | 38.16 |
| IPR014596 | 0 | 12 0 0  | 0 0 | 0 0 | 0 0 | 0 0 | 0 0 | 41.01 |

|           |   |         |     |     |     |     |     |       |
|-----------|---|---------|-----|-----|-----|-----|-----|-------|
| IPR014597 | 0 | 17 0 0  | 0 0 | 0 0 | 0 0 | 0 0 | 0 0 | 74.86 |
| IPR014601 | 0 | 50 0 0  | 0 0 | 0 0 | 0 0 | 0 0 | 0 0 | 57.4  |
| IPR014603 | 0 | 14 0 0  | 0 0 | 0 0 | 0 0 | 0 0 | 0 0 | 29.71 |
| IPR014617 | 0 | 22 0 0  | 0 0 | 0 0 | 0 0 | 0 0 | 0 0 | 49.45 |
| IPR014628 | 0 | 8 0 0   | 0 0 | 0 0 | 0 0 | 0 0 | 0 0 | 24.24 |
| IPR014631 | 0 | 23 0 0  | 0 0 | 0 0 | 0 0 | 0 0 | 0 0 | 36.93 |
| IPR014644 | 0 | 4 0 0   | 0 0 | 0 0 | 0 0 | 0 0 | 0 0 | 36.98 |
| IPR014796 | 0 | 15 0 0  | 0 0 | 0 0 | 0 0 | 0 0 | 0 0 | 77.31 |
| IPR014801 | 0 | 29 0 0  | 0 0 | 0 0 | 0 0 | 0 0 | 0 0 | 32.43 |
| IPR014802 | 0 | 22 0 0  | 0 0 | 0 0 | 0 0 | 0 0 | 0 0 | 33.43 |
| IPR014806 | 0 | 40 0 0  | 0 0 | 0 0 | 0 0 | 0 0 | 0 0 | 76.91 |
| IPR014840 | 0 | 27 0 0  | 0 0 | 0 0 | 0 0 | 0 0 | 0 0 | 34.08 |
| IPR014841 | 0 | 6 0 0   | 0 0 | 0 0 | 0 0 | 0 0 | 0 0 | 33.92 |
| IPR014843 | 0 | 10 0 0  | 0 0 | 0 0 | 0 0 | 0 0 | 0 0 | 28.23 |
| IPR014845 | 0 | 80 0 0  | 0 0 | 0 0 | 0 0 | 0 0 | 0 0 | 25.33 |
| IPR014849 | 0 | 24 0 0  | 0 0 | 0 0 | 0 0 | 0 0 | 0 0 | 35.82 |
| IPR014852 | 0 | 49 0 0  | 0 0 | 0 0 | 0 0 | 0 0 | 0 0 | 64.89 |
| IPR014860 | 0 | 94 0 0  | 0 0 | 0 0 | 0 0 | 0 0 | 0 0 | 29.35 |
| IPR014871 | 0 | 114 0 0 | 0 0 | 0 0 | 0 0 | 0 0 | 0 0 | 21.91 |
| IPR014875 | 0 | 120 0 0 | 0 0 | 0 0 | 0 0 | 0 0 | 0 0 | 18.38 |
| IPR014910 | 0 | 78 0 0  | 0 0 | 0 0 | 0 0 | 0 0 | 0 0 | 52.13 |
| IPR014913 | 0 | 47 0 0  | 0 0 | 0 0 | 0 0 | 0 0 | 0 0 | 35.31 |
| IPR014917 | 0 | 136 0 0 | 0 0 | 0 0 | 0 0 | 0 0 | 0 0 | 20.92 |
| IPR014921 | 0 | 32 0 0  | 0 0 | 0 0 | 0 0 | 0 0 | 0 0 | 39.73 |
| IPR014924 | 0 | 49 0 0  | 0 0 | 0 0 | 0 0 | 0 0 | 0 0 | 34.33 |
| IPR014926 | 0 | 19 0 0  | 0 0 | 0 0 | 0 0 | 0 0 | 0 0 | 33.73 |
| IPR014934 | 0 | 50 0 0  | 0 0 | 0 0 | 0 0 | 0 0 | 0 0 | 58.95 |
| IPR014938 | 0 | 45 0 0  | 0 0 | 0 0 | 0 0 | 0 0 | 0 0 | 55.32 |
| IPR014941 | 0 | 22 0 0  | 0 0 | 0 0 | 0 0 | 0 0 | 0 0 | 8.71  |
| IPR014943 | 0 | 25 0 0  | 0 0 | 0 0 | 0 0 | 0 0 | 0 0 | 68.77 |
| IPR014946 | 0 | 35 0 0  | 0 0 | 0 0 | 0 0 | 0 0 | 0 0 | 43.91 |
| IPR014947 | 0 | 36 0 0  | 0 0 | 0 0 | 0 0 | 0 0 | 0 0 | 36.87 |
| IPR014948 | 0 | 35 0 0  | 0 0 | 0 0 | 0 0 | 0 0 | 0 0 | 14.57 |
| IPR014949 | 0 | 57 0 0  | 0 0 | 0 0 | 0 0 | 0 0 | 0 0 | 53.95 |
| IPR014951 | 0 | 39 0 0  | 0 0 | 0 0 | 0 0 | 0 0 | 0 0 | 14.14 |
| IPR014952 | 0 | 31 0 0  | 0 0 | 0 0 | 0 0 | 0 0 | 0 0 | 50.36 |
| IPR014953 | 0 | 33 0 0  | 0 0 | 0 0 | 0 0 | 0 0 | 0 0 | 27.74 |
| IPR014954 | 0 | 36 0 0  | 0 0 | 0 0 | 0 0 | 0 0 | 0 0 | 77.96 |
| IPR014955 | 0 | 35 0 0  | 0 0 | 0 0 | 0 0 | 0 0 | 0 0 | 33.9  |
| IPR014959 | 0 | 39 0 0  | 0 0 | 0 0 | 0 0 | 0 0 | 0 0 | 56.37 |
| IPR014962 | 0 | 122 0 0 | 0 0 | 0 0 | 0 0 | 0 0 | 0 0 | 14.83 |
| IPR014965 | 0 | 47 0 0  | 0 0 | 0 0 | 0 0 | 0 0 | 0 0 | 49.7  |
| IPR014967 | 0 | 58 0 0  | 0 0 | 0 0 | 0 0 | 0 0 | 0 0 | 37.24 |
| IPR014969 | 0 | 34 0 0  | 0 0 | 0 0 | 0 0 | 0 0 | 0 0 | 25.25 |
| IPR014971 | 0 | 22 0 0  | 0 0 | 0 0 | 0 0 | 0 0 | 0 0 | 28.99 |
| IPR014972 | 0 | 16 0 0  | 0 0 | 0 0 | 0 0 | 0 0 | 0 0 | 14.2  |
| IPR014974 | 0 | 25 0 0  | 0 0 | 0 0 | 0 0 | 0 0 | 0 0 | 13.88 |
| IPR014980 | 0 | 78 0 0  | 0 0 | 0 0 | 0 0 | 0 0 | 0 0 | 40.14 |
| IPR014984 | 0 | 49 0 0  | 0 0 | 0 0 | 0 0 | 0 0 | 0 0 | 46.69 |
| IPR014985 | 0 | 91 0 0  | 0 0 | 0 0 | 0 0 | 0 0 | 0 0 | 21.93 |
| IPR014986 | 0 | 44 0 0  | 0 0 | 0 0 | 0 0 | 0 0 | 0 0 | 20.59 |
| IPR014987 | 0 | 96 0 0  | 0 0 | 0 0 | 0 0 | 0 0 | 0 0 | 53.84 |
| IPR014988 | 0 | 65 1 1  | 0 0 | 0 0 | 0 0 | 0 0 | 0 0 | 26.81 |
| IPR014989 | 0 | 44 0 0  | 0 0 | 0 0 | 0 0 | 0 0 | 0 0 | 44.5  |
| IPR014993 | 0 | 82 0 0  | 0 0 | 0 0 | 0 0 | 0 0 | 0 0 | 45.11 |
| IPR014998 | 0 | 51 0 0  | 0 0 | 0 0 | 0 0 | 0 0 | 0 0 | 36.94 |
| IPR014999 | 0 | 59 0 0  | 0 0 | 0 0 | 0 0 | 0 0 | 0 0 | 63.63 |
| IPR015000 | 0 | 53 0 0  | 0 0 | 0 0 | 0 0 | 0 0 | 0 0 | 35.49 |
| IPR015001 | 0 | 59 0 0  | 0 0 | 0 0 | 0 0 | 0 0 | 0 0 | 22.19 |
| IPR015003 | 0 | 75 0 0  | 0 0 | 0 0 | 0 0 | 0 0 | 0 0 | 24.64 |
| IPR015004 | 0 | 64 0 0  | 0 0 | 0 0 | 0 0 | 0 0 | 0 0 | 72.35 |
| IPR015017 | 0 | 42 0 0  | 0 0 | 0 0 | 0 0 | 0 0 | 0 0 | 35.36 |
| IPR015019 | 0 | 37 0 0  | 0 0 | 0 0 | 0 0 | 0 0 | 0 0 | 45.7  |
| IPR015021 | 0 | 39 0 0  | 0 0 | 0 0 | 0 0 | 0 0 | 0 0 | 52.1  |
| IPR015029 | 0 | 25 0 0  | 0 0 | 0 0 | 0 0 | 0 0 | 0 0 | 44.08 |
| IPR015034 | 0 | 28 0 0  | 0 0 | 0 0 | 0 0 | 0 0 | 0 0 | 23.66 |
| IPR015037 | 0 | 17 0 0  | 0 0 | 0 0 | 0 0 | 0 0 | 0 0 | 46.61 |
| IPR015038 | 0 | 48 0 0  | 0 0 | 0 0 | 0 0 | 0 0 | 0 0 | 78.98 |
| IPR015045 | 0 | 27 0 0  | 0 0 | 0 0 | 0 0 | 0 0 | 0 0 | 54.8  |
| IPR015053 | 0 | 28 0 0  | 0 0 | 0 0 | 0 0 | 0 0 | 0 0 | 48.68 |
| IPR015055 | 0 | 5 0 0   | 0 0 | 0 0 | 0 0 | 0 0 | 0 0 | 26.29 |
| IPR015058 | 0 | 25 0 0  | 0 0 | 0 0 | 0 0 | 0 0 | 0 0 | 50.17 |
| IPR015060 | 0 | 36 0 0  | 0 0 | 0 0 | 0 0 | 0 0 | 0 0 | 80.71 |
| IPR015062 | 0 | 21 0 0  | 0 0 | 0 0 | 0 0 | 0 0 | 0 0 | 67.74 |
| IPR015064 | 0 | 24 0 0  | 0 0 | 0 0 | 0 0 | 0 0 | 0 0 | 59.7  |
| IPR015065 | 0 | 49 0 0  | 0 0 | 0 0 | 0 0 | 0 0 | 0 0 | 60.96 |
| IPR015066 | 0 | 20 0 0  | 0 0 | 0 0 | 0 0 | 0 0 | 0 0 | 37.78 |
| IPR015067 | 0 | 14 0 0  | 0 0 | 0 0 | 0 0 | 0 0 | 0 0 | 39.74 |
| IPR015068 | 0 | 53 0 0  | 0 0 | 0 0 | 0 0 | 0 0 | 0 0 | 37.2  |
| IPR015078 | 0 | 14 0 0  | 0 0 | 0 0 | 0 0 | 0 0 | 0 0 | 57.72 |
| IPR015079 | 0 | 41 0 0  | 0 0 | 0 0 | 0 0 | 0 0 | 0 0 | 84.65 |
| IPR015080 | 0 | 6 0 0   | 0 0 | 0 0 | 0 0 | 0 0 | 0 0 | 46.54 |
| IPR015081 | 0 | 20 0 0  | 0 0 | 0 0 | 0 0 | 0 0 | 0 0 | 29.82 |
| IPR015084 | 0 | 15 0 0  | 0 0 | 0 0 | 0 0 | 0 0 | 0 0 | 72.47 |
| IPR015089 | 0 | 33 0 0  | 0 0 | 0 0 | 0 0 | 0 0 | 0 0 | 46.41 |
| IPR015102 | 0 | 116 0 0 | 0 0 | 0 0 | 0 0 | 0 0 | 0 0 | 29.97 |
| IPR015105 | 0 | 7 0 0   | 0 0 | 0 0 | 0 0 | 0 0 | 0 0 | 63.12 |
| IPR015112 | 0 | 15 0 0  | 0 0 | 0 0 | 0 0 | 0 0 | 0 0 | 83.27 |
| IPR015113 | 0 | 14 0 0  | 0 0 | 0 0 | 0 0 | 0 0 | 0 0 | 88.26 |
| IPR015131 | 0 | 6 0 0   | 0 0 | 0 0 | 0 0 | 0 0 | 0 0 | 41.08 |
| IPR015138 | 0 | 14 0 0  | 0 0 | 0 0 | 0 0 | 0 0 | 0 0 | 66.74 |
| IPR015139 | 0 | 21 0 0  | 0 0 | 0 0 | 0 0 | 0 0 | 0 0 | 98.08 |
| IPR015142 | 0 | 18 0 0  | 0 0 | 0 0 | 0 0 | 0 0 | 0 0 | 62.27 |
| IPR015157 | 0 | 77 0 0  | 0 0 | 0 0 | 0 0 | 0 0 | 0 0 | 57.56 |
| IPR015207 | 0 | 20 0 0  | 0 0 | 0 0 | 0 0 | 0 0 | 0 0 | 39.64 |
| IPR015221 | 0 | 78 0 0  | 0 0 | 0 0 | 0 0 | 0 0 | 0 0 | 43.15 |
| IPR015231 | 0 | 141 0 0 | 0 0 | 0 0 | 0 0 | 0 0 | 0 0 | 19.13 |
| IPR015235 | 0 | 16 0 0  | 0 0 | 0 0 | 0 0 | 0 0 | 0 0 | 45.14 |
| IPR015254 | 0 | 25 0 0  | 0 0 | 0 0 | 0 0 | 0 0 | 0 0 | 23.61 |
| IPR015277 | 0 | 8 0 0   | 0 0 | 0 0 | 0 0 | 0 0 | 0 0 | 46.14 |
| IPR015278 | 0 | 14 0 0  | 0 0 | 0 0 | 0 0 | 0 0 | 0 0 | 16.11 |
| IPR015287 | 0 | 13 0 0  | 0 0 | 0 0 | 0 0 | 0 0 | 0 0 | 46.49 |
| IPR015288 | 0 | 8 0 0   | 0 0 | 0 0 | 0 0 | 0 0 | 0 0 | 86.44 |
| IPR015305 | 0 | 8 0 0   | 0 0 | 0 0 | 0 0 | 0 0 | 0 0 | 45.85 |
| IPR015309 | 0 | 10 0 0  | 0 0 | 0 0 | 0 0 | 0 0 | 0 0 | 28.25 |
| IPR015385 | 0 | 10 0 0  | 0 0 | 0 0 | 0 0 | 0 0 | 0 0 | 44.06 |
| IPR015389 | 0 | 8 0 0   | 0 0 | 0 0 | 0 0 | 0 0 | 0 0 | 70.2  |
| IPR015465 | 0 | 8 0 0   | 0 0 | 0 0 | 0 0 | 0 0 | 0 0 | 11.13 |
| IPR015492 | 0 | 6 0 0   | 0 0 | 0 0 | 0 0 | 0 0 | 0 0 | 43.06 |
| IPR015568 | 0 | 4 0 0   | 0 0 | 0 0 | 0 0 | 0 0 | 0 0 | 44.2  |
| IPR015656 | 0 | 4 0 0   | 0 0 | 0 0 | 0 0 | 0 0 | 0 0 | 84.15 |
| IPR015663 | 0 | 6 0 0   | 0 0 | 0 0 | 0 0 | 0 0 | 0 0 | 75.12 |
| IPR015664 | 0 | 8 0 0   | 0 0 | 0 0 | 0 0 | 0 0 | 0 0 | 38.97 |
| IPR015667 | 0 | 9 0 0   | 0 0 | 0 0 | 0 0 | 0 0 | 0 0 | 93.79 |
| IPR015669 | 0 | 5 0 0   | 0 0 | 0 0 | 0 0 | 0 0 | 0 0 | 61.12 |
| IPR015673 | 0 | 5 0 0   | 0 0 | 0 0 | 0 0 | 0 0 | 0 0 | 72.06 |
| IPR015724 | 0 | 15 0 0  | 0 0 | 0 0 | 0 0 | 0 0 | 0 0 | 16.99 |
| IPR015757 | 0 | 49 0 0  | 0 0 | 0 0 | 0 0 | 0 0 | 0 0 | 57.26 |
| IPR015827 | 0 | 13 0 0  | 0 0 | 0 0 | 0 0 | 0 0 | 0 0 | 69.93 |
| IPR015832 | 0 | 5 0 0   | 0 0 | 0 0 | 0 0 | 0 0 | 0 0 | 42.15 |
| IPR015977 | 0 | 714 0 0 | 0 0 | 0 0 | 0 0 | 0 0 | 0 0 | 25.21 |
| IPR016003 | 0 | 3 0 0   | 0 0 | 0 0 | 0 0 | 0 0 | 0 0 | 36.97 |
| IPR016215 | 0 | 19 0 0  | 0 0 | 0 0 | 0 0 | 0 0 | 0 0 | 37.91 |
| IPR016219 | 0 | 23 0 0  | 0 0 | 0 0 | 0 0 | 0 0 | 0 0 | 55.21 |
| IPR016270 | 0 | 31 0 0  | 0 0 | 0 0 | 0 0 | 0 0 | 0 0 | 32.43 |
| IPR016332 | 0 | 5 0 0   | 0 0 | 0 0 | 0 0 | 0 0 | 0 0 | 52.67 |
| IPR016337 | 0 | 5 0 0   | 0 0 | 0 0 | 0 0 | 0 0 | 0 0 | 88.03 |
| IPR016340 | 0 | 29 0 0  | 0 0 | 0 0 | 0 0 | 0 0 | 0 0 | 62.85 |
| IPR016364 | 0 | 26 0 0  | 0 0 | 0 0 | 0 0 | 0 0 | 0 0 | 42.82 |
| IPR016367 | 0 | 67 0 0  | 0 0 | 0 0 | 0 0 | 0 0 | 0 0 | 49.74 |
| IPR016377 | 0 | 4 0 0   | 0 0 | 0 0 | 0 0 | 0 0 | 0 0 | 52.31 |
| IPR016379 | 0 | 8 0 0   | 0 0 | 0 0 | 0 0 | 0 0 | 0 0 | 26.48 |
| IPR016385 | 0 | 4 0 0   | 0 0 | 0 0 | 0 0 | 0 0 | 0 0 | 72.29 |
| IPR016386 | 0 | 3 0 0   | 0 0 | 0 0 | 0 0 | 0 0 | 0 0 | 72.26 |
| IPR016387 | 0 | 5 0 0   | 0 0 | 0 0 | 0 0 | 0 0 | 0 0 | 48.83 |
| IPR016388 | 0 | 3 0 0   | 0 0 | 0 0 | 0 0 | 0 0 | 0 0 | 96.06 |
| IPR016418 | 0 | 24 0 0  | 0 0 | 0 0 | 0 0 | 0 0 | 0 0 | 82.22 |
| IPR016419 | 0 | 25 0 0  | 0 0 | 0 0 | 0 0 | 0 0 | 0 0 | 44.21 |
| IPR016420 | 0 | 15 0 0  | 0 0 | 0 0 | 0 0 | 0 0 | 0 0 | 98.16 |
| IPR016421 | 0 | 6 0 0   | 0 0 | 0 0 | 0 0 | 0 0 | 0 0 | 19.77 |
| IPR016429 | 0 | 10 0 0  | 0 0 | 0 0 | 0 0 | 0 0 | 0 0 | 56.34 |
| IPR016431 | 0 | 17 0 0  | 0 0 | 0 0 | 0 0 | 0 0 | 0 0 | 33.82 |
| IPR016441 | 0 | 12 0 0  | 0 0 | 0 0 | 0 0 | 0 0 | 0 0 | 43.28 |
| IPR016457 | 0 | 5 0 0   | 0 0 | 0 0 | 0 0 | 0 0 | 0 0 | 31.11 |
| IPR016466 | 0 | 17 0 0  | 0 0 | 0 0 | 0 0 | 0 0 | 0 0 | 35.85 |
| IPR016472 | 0 | 3 0 0   | 0 0 | 0 0 | 0 0 | 0 0 | 0 0 | 98.73 |
| IPR016498 | 0 | 4 0 0   | 0 0 | 0 0 | 0 0 | 0 0 | 0 0 | 96.   |

|           |   |         |     |     |     |     |     |       |
|-----------|---|---------|-----|-----|-----|-----|-----|-------|
| IPR016499 | 0 | 17 0 0  | 0 0 | 0 0 | 0 0 | 0 0 | 0 0 | 59.2  |
| IPR016501 | 0 | 12 0 0  | 0 0 | 0 0 | 0 0 | 0 0 | 0 0 | 98.22 |
| IPR016502 | 0 | 27 0 0  | 0 0 | 0 0 | 0 0 | 0 0 | 0 0 | 64.17 |
| IPR016503 | 0 | 20 0 0  | 0 0 | 0 0 | 0 0 | 0 0 | 0 0 | 27.95 |
| IPR016504 | 0 | 21 0 0  | 0 0 | 0 0 | 0 0 | 0 0 | 0 0 | 98.48 |
| IPR016505 | 0 | 4 0 0   | 0 0 | 0 0 | 0 0 | 0 0 | 0 0 | 97.62 |
| IPR016508 | 0 | 12 0 0  | 0 0 | 0 0 | 0 0 | 0 0 | 0 0 | 85.32 |
| IPR016511 | 0 | 8 0 0   | 0 0 | 0 0 | 0 0 | 0 0 | 0 0 | 97.66 |
| IPR016512 | 0 | 14 0 0  | 0 0 | 0 0 | 0 0 | 0 0 | 0 0 | 98.51 |
| IPR016513 | 0 | 3 0 0   | 0 0 | 0 0 | 0 0 | 0 0 | 0 0 | 47.16 |
| IPR016514 | 0 | 22 0 0  | 0 0 | 0 0 | 0 0 | 0 0 | 0 0 | 98.36 |
| IPR016518 | 0 | 104 0 0 | 0 0 | 0 0 | 0 0 | 0 0 | 0 0 | 32.06 |
| IPR016527 | 0 | 4 0 0   | 0 0 | 0 0 | 0 0 | 0 0 | 0 0 | 33.39 |
| IPR016540 | 0 | 31 0 0  | 0 0 | 0 0 | 0 0 | 0 0 | 0 0 | 36.22 |
| IPR016541 | 0 | 11 0 0  | 0 0 | 0 0 | 0 0 | 0 0 | 0 0 | 41.07 |
| IPR016543 | 0 | 21 0 0  | 0 0 | 0 0 | 0 0 | 0 0 | 0 0 | 34.69 |
| IPR016545 | 0 | 52 0 0  | 0 0 | 0 0 | 0 0 | 0 0 | 0 0 | 48.62 |
| IPR016546 | 0 | 18 0 0  | 0 0 | 0 0 | 0 0 | 0 0 | 0 0 | 42.16 |
| IPR016549 | 0 | 17 0 0  | 0 0 | 0 0 | 0 0 | 0 0 | 0 0 | 56.25 |
| IPR016550 | 0 | 9 0 0   | 0 0 | 0 0 | 0 0 | 0 0 | 0 0 | 77.48 |
| IPR016553 | 0 | 4 0 0   | 0 0 | 0 0 | 0 0 | 0 0 | 0 0 | 70.25 |
| IPR016557 | 0 | 6 0 0   | 0 0 | 0 0 | 0 0 | 0 0 | 0 0 | 50.57 |
| IPR016560 | 0 | 6 0 0   | 0 0 | 0 0 | 0 0 | 0 0 | 0 0 | 70.39 |
| IPR016565 | 0 | 6 0 0   | 0 0 | 0 0 | 0 0 | 0 0 | 0 0 | 66.16 |
| IPR016566 | 0 | 4 0 0   | 0 0 | 0 0 | 0 0 | 0 0 | 0 0 | 39.53 |
| IPR016568 | 0 | 78 0 0  | 0 0 | 0 0 | 0 0 | 0 0 | 0 0 | 31.91 |
| IPR016571 | 0 | 53 0 0  | 0 0 | 0 0 | 0 0 | 0 0 | 0 0 | 46.94 |
| IPR016572 | 0 | 17 0 0  | 0 0 | 0 0 | 0 0 | 0 0 | 0 0 | 52.52 |
| IPR016574 | 0 | 9 0 0   | 0 0 | 0 0 | 0 0 | 0 0 | 0 0 | 68.53 |
| IPR016575 | 0 | 9 0 0   | 0 0 | 0 0 | 0 0 | 0 0 | 0 0 | 69.89 |
| IPR016576 | 0 | 19 0 0  | 0 0 | 0 0 | 0 0 | 0 0 | 0 0 | 65.87 |
| IPR016583 | 0 | 9 0 0   | 0 0 | 0 0 | 0 0 | 0 0 | 0 0 | 79.29 |
| IPR016584 | 0 | 3 0 0   | 0 0 | 0 0 | 0 0 | 0 0 | 0 0 | 98.76 |
| IPR016595 | 0 | 5 0 0   | 0 0 | 0 0 | 0 0 | 0 0 | 0 0 | 53.06 |
| IPR016599 | 0 | 11 0 0  | 0 0 | 0 0 | 0 0 | 0 0 | 0 0 | 41.37 |
| IPR016601 | 0 | 18 0 0  | 0 0 | 0 0 | 0 0 | 0 0 | 0 0 | 65.21 |
| IPR016602 | 0 | 34 0 0  | 0 0 | 0 0 | 0 0 | 0 0 | 0 0 | 48.68 |
| IPR016605 | 0 | 15 0 0  | 0 0 | 0 0 | 0 0 | 0 0 | 0 0 | 48.8  |
| IPR016606 | 0 | 10 0 0  | 0 0 | 0 0 | 0 0 | 0 0 | 0 0 | 34.94 |
| IPR016616 | 0 | 14 0 0  | 0 0 | 0 0 | 0 0 | 0 0 | 0 0 | 57.96 |
| IPR016617 | 0 | 4 0 0   | 0 0 | 0 0 | 0 0 | 0 0 | 0 0 | 52.61 |
| IPR016618 | 0 | 11 0 0  | 0 0 | 0 0 | 0 0 | 0 0 | 0 0 | 50.07 |
| IPR016621 | 0 | 15 0 0  | 0 0 | 0 0 | 0 0 | 0 0 | 0 0 | 48.18 |
| IPR016628 | 0 | 20 0 0  | 0 0 | 0 0 | 0 0 | 0 0 | 0 0 | 71.34 |
| IPR016629 | 0 | 9 0 0   | 0 0 | 0 0 | 0 0 | 0 0 | 0 0 | 60.32 |
| IPR016630 | 0 | 23 0 0  | 0 0 | 0 0 | 0 0 | 0 0 | 0 0 | 29.44 |
| IPR016631 | 0 | 28 0 0  | 0 0 | 0 0 | 0 0 | 0 0 | 0 0 | 51.39 |
| IPR016633 | 0 | 97 0 0  | 0 0 | 0 0 | 0 0 | 0 0 | 0 0 | 42.31 |
| IPR016634 | 0 | 96 0 0  | 0 0 | 0 0 | 0 0 | 0 0 | 0 0 | 27.42 |
| IPR016639 | 0 | 41 0 0  | 0 0 | 0 0 | 0 0 | 0 0 | 0 0 | 44.49 |
| IPR016648 | 0 | 5 0 0   | 0 0 | 0 0 | 0 0 | 0 0 | 0 0 | 35.32 |
| IPR016656 | 0 | 3 0 0   | 0 0 | 0 0 | 0 0 | 0 0 | 0 0 | 42.39 |
| IPR016667 | 0 | 17 0 0  | 0 0 | 0 0 | 0 0 | 0 0 | 0 0 | 24.34 |
| IPR016673 | 0 | 7 0 0   | 0 0 | 0 0 | 0 0 | 0 0 | 0 0 | 54.15 |
| IPR016674 | 0 | 5 0 0   | 0 0 | 0 0 | 0 0 | 0 0 | 0 0 | 49.9  |
| IPR016676 | 0 | 3 0 0   | 0 0 | 0 0 | 0 0 | 0 0 | 0 0 | 73.21 |
| IPR016680 | 0 | 3 0 0   | 0 0 | 0 0 | 0 0 | 0 0 | 0 0 | 43.32 |
| IPR016683 | 0 | 4 0 0   | 0 0 | 0 0 | 0 0 | 0 0 | 0 0 | 43.73 |
| IPR016684 | 0 | 8 0 0   | 0 0 | 0 0 | 0 0 | 0 0 | 0 0 | 57.1  |
| IPR016697 | 0 | 14 0 0  | 0 0 | 0 0 | 0 0 | 0 0 | 0 0 | 41.03 |
| IPR016703 | 0 | 8 0 0   | 0 0 | 0 0 | 0 0 | 0 0 | 0 0 | 51.12 |
| IPR016705 | 0 | 9 0 0   | 0 0 | 0 0 | 0 0 | 0 0 | 0 0 | 54.06 |
| IPR016706 | 0 | 28 0 0  | 0 0 | 0 0 | 0 0 | 0 0 | 0 0 | 51.78 |
| IPR016709 | 0 | 82 0 0  | 0 0 | 0 0 | 0 0 | 0 0 | 0 0 | 27.85 |
| IPR016718 | 0 | 20 0 0  | 0 0 | 0 0 | 0 0 | 0 0 | 0 0 | 36.46 |
| IPR016719 | 0 | 4 0 0   | 0 0 | 0 0 | 0 0 | 0 0 | 0 0 | 64.5  |
| IPR016735 | 0 | 8 0 0   | 0 0 | 0 0 | 0 0 | 0 0 | 0 0 | 49.67 |
| IPR016754 | 0 | 10 0 0  | 0 0 | 0 0 | 0 0 | 0 0 | 0 0 | 37.7  |
| IPR016757 | 0 | 12 0 0  | 0 0 | 0 0 | 0 0 | 0 0 | 0 0 | 37.03 |
| IPR016760 | 0 | 9 0 0   | 0 0 | 0 0 | 0 0 | 0 0 | 0 0 | 60.04 |
| IPR016762 | 0 | 17 0 0  | 0 0 | 0 0 | 0 0 | 0 0 | 0 0 | 30.62 |
| IPR016764 | 0 | 8 0 0   | 0 0 | 0 0 | 0 0 | 0 0 | 0 0 | 49.81 |
| IPR016767 | 0 | 9 0 0   | 0 0 | 0 0 | 0 0 | 0 0 | 0 0 | 38.15 |
| IPR016768 | 0 | 56 0 0  | 0 0 | 0 0 | 0 0 | 0 0 | 0 0 | 52.32 |
| IPR016769 | 0 | 8 0 0   | 0 0 | 0 0 | 0 0 | 0 0 | 0 0 | 55.28 |
| IPR016776 | 0 | 49 0 0  | 0 0 | 0 0 | 0 0 | 0 0 | 0 0 | 32.57 |
| IPR016777 | 0 | 3 0 0   | 0 0 | 0 0 | 0 0 | 0 0 | 0 0 | 98.64 |
| IPR016780 | 0 | 25 0 0  | 0 0 | 0 0 | 0 0 | 0 0 | 0 0 | 41.09 |
| IPR016781 | 0 | 24 0 0  | 0 0 | 0 0 | 0 0 | 0 0 | 0 0 | 42.37 |
| IPR016785 | 0 | 17 0 0  | 0 0 | 0 0 | 0 0 | 0 0 | 0 0 | 26.11 |
| IPR016787 | 0 | 53 0 0  | 0 0 | 0 0 | 0 0 | 0 0 | 0 0 | 35.68 |
| IPR016790 | 0 | 25 0 0  | 0 0 | 0 0 | 0 0 | 0 0 | 0 0 | 54.87 |
| IPR016791 | 0 | 9 0 0   | 0 0 | 0 0 | 0 0 | 0 0 | 0 0 | 70.78 |
| IPR016792 | 0 | 14 0 0  | 0 0 | 0 0 | 0 0 | 0 0 | 0 0 | 59.61 |
| IPR016793 | 0 | 30 0 0  | 0 0 | 0 0 | 0 0 | 0 0 | 0 0 | 40.4  |
| IPR016797 | 0 | 6 0 0   | 0 0 | 0 0 | 0 0 | 0 0 | 0 0 | 66.04 |
| IPR016800 | 0 | 8 0 0   | 0 0 | 0 0 | 0 0 | 0 0 | 0 0 | 43.31 |
| IPR016802 | 0 | 6 0 0   | 0 0 | 0 0 | 0 0 | 0 0 | 0 0 | 51    |
| IPR016803 | 0 | 12 0 0  | 0 0 | 0 0 | 0 0 | 0 0 | 0 0 | 39.92 |
| IPR016812 | 0 | 16 0 0  | 0 0 | 0 0 | 0 0 | 0 0 | 0 0 | 45.16 |
| IPR016813 | 0 | 24 0 0  | 0 0 | 0 0 | 0 0 | 0 0 | 0 0 | 55.75 |
| IPR016818 | 0 | 11 0 0  | 0 0 | 0 0 | 0 0 | 0 0 | 0 0 | 44.81 |
| IPR016823 | 0 | 12 0 0  | 0 0 | 0 0 | 0 0 | 0 0 | 0 0 | 59.59 |
| IPR016833 | 0 | 73 0 0  | 0 0 | 0 0 | 0 0 | 0 0 | 0 0 | 54.66 |
| IPR016834 | 0 | 15 0 0  | 0 0 | 0 0 | 0 0 | 0 0 | 0 0 | 52    |
| IPR016841 | 0 | 16 0 0  | 0 0 | 0 0 | 0 0 | 0 0 | 0 0 | 73.69 |
| IPR016843 | 0 | 5 0 0   | 0 0 | 0 0 | 0 0 | 0 0 | 0 0 | 61.13 |
| IPR016844 | 0 | 5 0 0   | 0 0 | 0 0 | 0 0 | 0 0 | 0 0 | 100   |
| IPR016847 | 0 | 10 0 0  | 0 0 | 0 0 | 0 0 | 0 0 | 0 0 | 61    |
| IPR016867 | 0 | 69 0 0  | 0 0 | 0 0 | 0 0 | 0 0 | 0 0 | 22.67 |
| IPR016870 | 0 | 20 0 0  | 0 0 | 0 0 | 0 0 | 0 0 | 0 0 | 48.04 |
| IPR016871 | 0 | 10 0 0  | 0 0 | 0 0 | 0 0 | 0 0 | 0 0 | 46.34 |
| IPR016873 | 0 | 14 0 0  | 0 0 | 0 0 | 0 0 | 0 0 | 0 0 | 46.57 |
| IPR016875 | 0 | 46 0 0  | 0 0 | 0 0 | 0 0 | 0 0 | 0 0 | 25.64 |
| IPR016877 | 0 | 19 0 0  | 0 0 | 0 0 | 0 0 | 0 0 | 0 0 | 59.88 |
| IPR016878 | 0 | 22 0 0  | 0 0 | 0 0 | 0 0 | 0 0 | 0 0 | 40.4  |
| IPR016884 | 0 | 3 0 0   | 0 0 | 0 0 | 0 0 | 0 0 | 0 0 | 61.01 |
| IPR016885 | 0 | 4 0 0   | 0 0 | 0 0 | 0 0 | 0 0 | 0 0 | 89.9  |
| IPR016888 | 0 | 22 0 0  | 0 0 | 0 0 | 0 0 | 0 0 | 0 0 | 33.69 |
| IPR016891 | 0 | 6 0 0   | 0 0 | 0 0 | 0 0 | 0 0 | 0 0 | 45.69 |
| IPR016892 | 0 | 5 0 0   | 0 0 | 0 0 | 0 0 | 0 0 | 0 0 | 52.7  |
| IPR016893 | 0 | 20 0 0  | 0 0 | 0 0 | 0 0 | 0 0 | 0 0 | 30.67 |
| IPR016895 | 0 | 6 0 0   | 0 0 | 0 0 | 0 0 | 0 0 | 0 0 | 64.11 |
| IPR016896 | 0 | 19 0 0  | 0 0 | 0 0 | 0 0 | 0 0 | 0 0 | 25.68 |
| IPR016908 | 0 | 50 0 0  | 0 0 | 0 0 | 0 0 | 0 0 | 0 0 | 47.16 |
| IPR016918 | 0 | 56 0 0  | 0 0 | 0 0 | 0 0 | 0 0 | 0 0 | 38.48 |
| IPR016919 | 0 | 24 0 0  | 0 0 | 0 0 | 0 0 | 0 0 | 0 0 | 54.25 |
| IPR016921 | 0 | 11 0 0  | 0 0 | 0 0 | 0 0 | 0 0 | 0 0 | 52.51 |
| IPR016922 | 0 | 24 0 0  | 0 0 | 0 0 | 0 0 | 0 0 | 0 0 | 45.67 |
| IPR016923 | 0 | 14 0 0  | 0 0 | 0 0 | 0 0 | 0 0 | 0 0 | 37.32 |
| IPR016924 | 0 | 22 0 0  | 0 0 | 0 0 | 0 0 | 0 0 | 0 0 | 32.59 |
| IPR016929 | 0 | 16 0 0  | 0 0 | 0 0 | 0 0 | 0 0 | 0 0 | 42.65 |
| IPR016931 | 0 | 33 0 0  | 0 0 | 0 0 | 0 0 | 0 0 | 0 0 | 38.18 |
| IPR016934 | 0 | 7 0 0   | 0 0 | 0 0 | 0 0 | 0 0 | 0 0 | 38.43 |
| IPR016935 | 0 | 31 0 0  | 0 0 | 0 0 | 0 0 | 0 0 | 0 0 | 48.9  |
| IPR016936 | 0 | 86 0 0  | 0 0 | 0 0 | 0 0 | 0 0 | 0 0 | 38.84 |
| IPR016939 | 0 | 22 0 0  | 0 0 | 0 0 | 0 0 | 0 0 | 0 0 | 50.81 |
| IPR016940 | 0 | 6 0 0   | 0 0 | 0 0 | 0 0 | 0 0 | 0 0 | 52.14 |
| IPR016942 | 0 | 24 0 0  | 0 0 | 0 0 | 0 0 | 0 0 | 0 0 | 27.84 |
| IPR016944 | 0 | 22 0 0  | 0 0 | 0 0 | 0 0 | 0 0 | 0 0 | 36.54 |
| IPR016946 | 0 | 10 0 0  | 0 0 | 0 0 | 0 0 | 0 0 | 0 0 | 58.24 |
| IPR016948 | 0 | 11 0 0  | 0 0 | 0 0 | 0 0 | 0 0 | 0 0 | 78.96 |
| IPR016950 | 0 | 8 0 0   | 0 0 | 0 0 | 0 0 | 0 0 | 0 0 | 36.82 |
| IPR016953 | 0 | 5 0 0   | 0 0 | 0 0 | 0 0 | 0 0 | 0 0 | 49.8  |
| IPR016954 | 0 | 8 0 0   | 0 0 | 0 0 | 0 0 | 0 0 | 0 0 | 26.72 |
| IPR016957 | 0 | 5 0 0   | 0 0 | 0 0 | 0 0 | 0 0 | 0 0 | 79.94 |
| IPR016958 | 0 | 39 0 0  | 0 0 | 0 0 | 0 0 | 0 0 | 0 0 | 87.01 |
| IPR016959 | 0 | 25 0 0  | 0 0 | 0 0 | 0 0 | 0 0 | 0 0 | 70.97 |
| IPR016960 | 0 | 27 0 0  | 0 0 | 0 0 | 0 0 | 0 0 | 0 0 | 96.89 |
| IPR016962 | 0 | 3 0 0   | 0 0 | 0 0 | 0 0 | 0 0 | 0 0 | 44.4  |
| IPR016963 | 0 | 21 0 0  | 0 0 | 0 0 | 0 0 | 0 0 | 0 0 | 83.38 |
| IPR016971 | 0 | 11 0 0  | 0 0 | 0 0 | 0 0 | 0 0 | 0 0 | 40.74 |
| IPR016972 | 0 | 15 0 0  | 0 0 | 0 0 | 0 0 | 0 0 | 0 0 | 36.5  |
| IPR016974 | 0 | 4 0 0   | 0 0 | 0 0 | 0 0 | 0 0 | 0 0 | 91.88 |
| IPR016977 | 0 | 35 0 0  | 0 0 | 0 0 | 0 0 | 0 0 | 0 0 | 45.78 |
| IPR016978 | 0 | 5 0 0   | 0 0 | 0 0 | 0 0 | 0 0 | 0 0 | 45.11 |
| IPR016980 | 0 | 53 0 0  | 0 0 | 0 0 | 0 0 | 0 0 | 0 0 | 37.48 |

|           |   |         |     |     |     |     |     |       |
|-----------|---|---------|-----|-----|-----|-----|-----|-------|
| IPR016986 | 0 | 21 0 0  | 0 0 | 0 0 | 0 0 | 0 0 | 0 0 | 24.56 |
| IPR016987 | 0 | 16 0 0  | 0 0 | 0 0 | 0 0 | 0 0 | 0 0 | 50.92 |
| IPR016989 | 0 | 40 0 0  | 0 0 | 0 0 | 0 0 | 0 0 | 0 0 | 35.56 |
| IPR016994 | 0 | 17 0 0  | 0 0 | 0 0 | 0 0 | 0 0 | 0 0 | 70.12 |
| IPR016997 | 0 | 63 0 0  | 0 0 | 0 0 | 0 0 | 0 0 | 0 0 | 38.84 |
| IPR017000 | 0 | 27 0 0  | 0 0 | 0 0 | 0 0 | 0 0 | 0 0 | 49.44 |
| IPR017006 | 0 | 15 0 0  | 0 0 | 0 0 | 0 0 | 0 0 | 0 0 | 47.42 |
| IPR017008 | 0 | 12 0 0  | 0 0 | 0 0 | 0 0 | 0 0 | 0 0 | 43.47 |
| IPR017012 | 0 | 4 0 0   | 0 0 | 0 0 | 0 0 | 0 0 | 0 0 | 62.06 |
| IPR017013 | 0 | 7 0 0   | 0 0 | 0 0 | 0 0 | 0 0 | 0 0 | 99.8  |
| IPR017015 | 0 | 8 0 0   | 0 0 | 0 0 | 0 0 | 0 0 | 0 0 | 36.59 |
| IPR017016 | 0 | 15 0 0  | 0 0 | 0 0 | 0 0 | 0 0 | 0 0 | 50.95 |
| IPR017018 | 0 | 20 0 0  | 0 0 | 0 0 | 0 0 | 0 0 | 0 0 | 50.79 |
| IPR017020 | 0 | 5 0 0   | 0 0 | 0 0 | 0 0 | 0 0 | 0 0 | 25.03 |
| IPR017024 | 0 | 14 0 0  | 0 0 | 0 0 | 0 0 | 0 0 | 0 0 | 60.71 |
| IPR017026 | 0 | 62 0 0  | 0 0 | 0 0 | 0 0 | 0 0 | 0 0 | 30.56 |
| IPR017028 | 0 | 6 0 0   | 0 0 | 0 0 | 0 0 | 0 0 | 0 0 | 86.16 |
| IPR017029 | 0 | 5 0 0   | 0 0 | 0 0 | 0 0 | 0 0 | 0 0 | 98.53 |
| IPR017030 | 0 | 42 0 0  | 0 0 | 0 0 | 0 0 | 0 0 | 0 0 | 32.73 |
| IPR017033 | 0 | 12 0 0  | 0 0 | 0 0 | 0 0 | 0 0 | 0 0 | 78.15 |
| IPR017041 | 0 | 16 0 0  | 0 0 | 0 0 | 0 0 | 0 0 | 0 0 | 60.73 |
| IPR017042 | 0 | 21 0 0  | 0 0 | 0 0 | 0 0 | 0 0 | 0 0 | 53.79 |
| IPR017057 | 0 | 4 0 0   | 0 0 | 0 0 | 0 0 | 0 0 | 0 0 | 31.39 |
| IPR017059 | 0 | 10 0 0  | 0 0 | 0 0 | 0 0 | 0 0 | 0 0 | 60.27 |
| IPR017062 | 0 | 7 0 0   | 0 0 | 0 0 | 0 0 | 0 0 | 0 0 | 54.1  |
| IPR017066 | 0 | 47 0 0  | 0 0 | 0 0 | 0 0 | 0 0 | 0 0 | 28.99 |
| IPR017072 | 0 | 5 0 0   | 0 0 | 0 0 | 0 0 | 0 0 | 0 0 | 74.68 |
| IPR017088 | 0 | 17 0 0  | 0 0 | 11  | 0 0 | 0 0 | 0 0 | 46.87 |
| IPR017098 | 0 | 8 0 0   | 0 0 | 0 0 | 0 0 | 0 0 | 0 0 | 40.95 |
| IPR017143 | 0 | 75 0 0  | 0 0 | 0 0 | 0 0 | 0 0 | 0 0 | 39.45 |
| IPR017144 | 0 | 13 0 0  | 0 0 | 0 0 | 0 0 | 0 0 | 0 0 | 61.28 |
| IPR017145 | 0 | 11 0 0  | 0 0 | 0 0 | 0 0 | 0 0 | 0 0 | 57.15 |
| IPR017154 | 0 | 62 0 0  | 0 0 | 0 0 | 0 0 | 0 0 | 0 0 | 64.39 |
| IPR017166 | 0 | 78 0 0  | 0 0 | 0 0 | 0 0 | 0 0 | 0 0 | 38.53 |
| IPR017167 | 0 | 7 0 0   | 0 0 | 0 0 | 0 0 | 0 0 | 0 0 | 66.52 |
| IPR017169 | 0 | 9 0 0   | 0 0 | 0 0 | 0 0 | 0 0 | 0 0 | 52.91 |
| IPR017185 | 0 | 11 0 0  | 0 0 | 0 0 | 0 0 | 0 0 | 0 0 | 43.42 |
| IPR017196 | 0 | 8 0 0   | 0 0 | 0 0 | 0 0 | 0 0 | 0 0 | 53.59 |
| IPR017199 | 0 | 14 0 0  | 0 0 | 0 0 | 0 0 | 0 0 | 0 0 | 28.44 |
| IPR017208 | 0 | 58 0 0  | 0 0 | 0 0 | 0 0 | 0 0 | 0 0 | 24.71 |
| IPR017211 | 0 | 17 0 0  | 0 0 | 0 0 | 0 0 | 0 0 | 0 0 | 52.22 |
| IPR017216 | 0 | 8 0 0   | 0 0 | 0 0 | 0 0 | 0 0 | 0 0 | 91.08 |
| IPR017217 | 0 | 18 0 0  | 0 0 | 0 0 | 0 0 | 0 0 | 0 0 | 54.48 |
| IPR017218 | 0 | 5 0 0   | 0 0 | 0 0 | 0 0 | 0 0 | 0 0 | 59.01 |
| IPR017242 | 0 | 16 0 0  | 0 0 | 0 0 | 0 0 | 0 0 | 0 0 | 47.04 |
| IPR017243 | 0 | 9 0 0   | 0 0 | 0 0 | 0 0 | 0 0 | 0 0 | 57.04 |
| IPR017245 | 0 | 7 0 0   | 0 0 | 0 0 | 0 0 | 0 0 | 0 0 | 63.22 |
| IPR017246 | 0 | 18 0 0  | 0 0 | 0 0 | 0 0 | 0 0 | 0 0 | 60.06 |
| IPR017248 | 0 | 9 0 0   | 0 0 | 0 0 | 0 0 | 0 0 | 0 0 | 78.34 |
| IPR017254 | 0 | 8 0 0   | 0 0 | 0 0 | 0 0 | 0 0 | 0 0 | 69.87 |
| IPR017257 | 0 | 16 0 0  | 0 0 | 0 0 | 0 0 | 0 0 | 0 0 | 85.90 |
| IPR017259 | 0 | 12 0 0  | 0 0 | 0 0 | 0 0 | 0 0 | 0 0 | 82.78 |
| IPR017260 | 0 | 35 0 0  | 0 0 | 0 0 | 0 0 | 0 0 | 0 0 | 50.64 |
| IPR017263 | 0 | 5 0 0   | 0 0 | 0 0 | 0 0 | 0 0 | 0 0 | 53.13 |
| IPR017264 | 0 | 11 0 0  | 0 0 | 0 0 | 0 0 | 0 0 | 0 0 | 62.97 |
| IPR017275 | 0 | 15 0 0  | 0 0 | 0 0 | 0 0 | 0 0 | 0 0 | 64.39 |
| IPR017278 | 0 | 4 0 0   | 0 0 | 0 0 | 0 0 | 0 0 | 0 0 | 66.42 |
| IPR017382 | 0 | 5 0 0   | 0 0 | 0 0 | 0 0 | 0 0 | 0 0 | 50.57 |
| IPR017384 | 0 | 13 0 0  | 0 0 | 0 0 | 0 0 | 0 0 | 0 0 | 51.58 |
| IPR017404 | 0 | 6 0 0   | 0 0 | 0 0 | 0 0 | 0 0 | 0 0 | 81.74 |
| IPR017408 | 0 | 16 0 0  | 0 0 | 0 0 | 0 0 | 0 0 | 0 0 | 45.3  |
| IPR017411 | 0 | 8 0 0   | 0 0 | 0 0 | 0 0 | 0 0 | 0 0 | 63.8  |
| IPR017496 | 0 | 33 0 0  | 0 0 | 0 0 | 0 0 | 0 0 | 0 0 | 33.23 |
| IPR017499 | 0 | 46 0 0  | 0 0 | 11  | 0 0 | 0 0 | 0 0 | 35.39 |
| IPR017557 | 0 | 89 0 0  | 0 0 | 0 0 | 0 0 | 0 0 | 0 0 | 20.67 |
| IPR017744 | 0 | 72 0 0  | 0 0 | 0 0 | 0 0 | 0 0 | 0 0 | 56.07 |
| IPR017746 | 0 | 78 0 0  | 0 0 | 0 0 | 0 0 | 0 0 | 0 0 | 34.17 |
| IPR018013 | 0 | 227 0 0 | 0 0 | 0 0 | 0 0 | 0 0 | 0 0 | 17.36 |
| IPR018315 | 0 | 109 0 0 | 0 0 | 0 0 | 0 0 | 0 0 | 0 0 | 41.93 |
| IPR018330 | 0 | 185 0 0 | 0 0 | 0 0 | 0 0 | 0 0 | 0 0 | 12.73 |
| IPR018385 | 0 | 376 0 0 | 0 0 | 0 0 | 0 0 | 0 0 | 0 0 | 17.8  |
| IPR018390 | 0 | 14 0 0  | 0 0 | 0 0 | 0 0 | 0 0 | 0 0 | 72.96 |
| IPR018450 | 0 | 70 0 0  | 0 0 | 0 0 | 0 0 | 0 0 | 0 0 | 44.26 |
| IPR018472 | 0 | 23 0 0  | 0 0 | 0 0 | 0 0 | 0 0 | 0 0 | 33.56 |
| IPR018477 | 0 | 32 0 0  | 0 0 | 0 0 | 0 0 | 0 0 | 0 0 | 52.34 |
| IPR018482 | 0 | 41 0 0  | 0 0 | 0 0 | 0 0 | 0 0 | 0 0 | 40.89 |
| IPR018536 | 0 | 91 0 0  | 0 0 | 0 0 | 0 0 | 0 0 | 0 0 | 25.2  |
| IPR018544 | 0 | 9 0 0   | 0 0 | 0 0 | 0 0 | 0 0 | 0 0 | 36.69 |
| IPR018547 | 0 | 6 0 0   | 0 0 | 0 0 | 0 0 | 0 0 | 0 0 | 76.29 |
| IPR018550 | 0 | 165 0 0 | 0 0 | 0 0 | 0 0 | 0 0 | 0 0 | 12.5  |
| IPR018551 | 0 | 57 0 0  | 0 0 | 0 0 | 0 0 | 0 0 | 0 0 | 47    |
| IPR018552 | 0 | 41 0 0  | 0 0 | 0 0 | 0 0 | 0 0 | 0 0 | 32.59 |
| IPR018554 | 0 | 5 0 0   | 0 0 | 0 0 | 0 0 | 0 0 | 0 0 | 27.03 |
| IPR018558 | 0 | 3 0 0   | 0 0 | 0 0 | 0 0 | 0 0 | 0 0 | 58.3  |
| IPR018559 | 0 | 27 0 0  | 0 0 | 0 0 | 0 0 | 0 0 | 0 0 | 50.83 |
| IPR018561 | 0 | 58 0 0  | 0 0 | 0 0 | 0 0 | 0 0 | 0 0 | 29.79 |
| IPR018563 | 0 | 23 0 0  | 0 0 | 0 0 | 0 0 | 0 0 | 0 0 | 36.34 |
| IPR018574 | 0 | 18 0 0  | 0 0 | 0 0 | 0 0 | 0 0 | 0 0 | 27.4  |
| IPR018580 | 0 | 162 0 0 | 0 0 | 0 0 | 0 0 | 0 0 | 0 0 | 12.04 |
| IPR018581 | 0 | 3 0 0   | 0 0 | 0 0 | 0 0 | 0 0 | 0 0 | 41.82 |
| IPR018590 | 0 | 4 0 0   | 0 0 | 0 0 | 0 0 | 0 0 | 0 0 | 67.78 |
| IPR018592 | 0 | 13 0 0  | 0 0 | 0 0 | 0 0 | 0 0 | 0 0 | 42.36 |
| IPR018595 | 0 | 12 0 0  | 0 0 | 0 0 | 0 0 | 0 0 | 0 0 | 69.8  |
| IPR018596 | 0 | 3 0 0   | 0 0 | 0 0 | 0 0 | 0 0 | 0 0 | 67.1  |
| IPR018599 | 0 | 4 0 0   | 0 0 | 0 0 | 0 0 | 0 0 | 0 0 | 33.66 |
| IPR018602 | 0 | 17 0 0  | 0 0 | 0 0 | 0 0 | 0 0 | 0 0 | 29.93 |
| IPR018614 | 0 | 37 0 0  | 0 0 | 0 0 | 0 0 | 0 0 | 0 0 | 42    |
| IPR018615 | 0 | 28 0 0  | 0 0 | 0 0 | 0 0 | 0 0 | 0 0 | 47.62 |
| IPR018621 | 0 | 3 0 0   | 0 0 | 0 0 | 0 0 | 0 0 | 0 0 | 66.44 |
| IPR018624 | 0 | 31 0 0  | 0 0 | 0 0 | 0 0 | 0 0 | 0 0 | 47.41 |
| IPR018625 | 0 | 31 0 0  | 0 0 | 0 0 | 0 0 | 0 0 | 0 0 | 38.63 |
| IPR018626 | 0 | 34 0 0  | 0 0 | 0 0 | 0 0 | 0 0 | 0 0 | 30.38 |
| IPR018627 | 0 | 51 0 0  | 0 0 | 0 0 | 0 0 | 0 0 | 0 0 | 17.51 |
| IPR018629 | 0 | 125 0 0 | 0 0 | 0 0 | 0 0 | 0 0 | 0 0 | 18.39 |
| IPR018630 | 0 | 25 0 0  | 0 0 | 0 0 | 0 0 | 0 0 | 0 0 | 31.19 |
| IPR018635 | 0 | 170 0 0 | 0 0 | 0 0 | 0 0 | 0 0 | 0 0 | 19.99 |
| IPR018636 | 0 | 141 0 0 | 0 0 | 0 0 | 0 0 | 0 0 | 0 0 | 41.15 |
| IPR018643 | 0 | 122 0 0 | 0 0 | 0 0 | 0 0 | 0 0 | 0 0 | 26.38 |
| IPR018644 | 0 | 62 0 0  | 0 0 | 0 0 | 0 0 | 0 0 | 0 0 | 16.62 |
| IPR018645 | 0 | 22 0 0  | 0 0 | 0 0 | 0 0 | 0 0 | 0 0 | 22.58 |
| IPR018648 | 0 | 87 0 0  | 0 0 | 0 0 | 0 0 | 0 0 | 0 0 | 28.9  |
| IPR018650 | 0 | 80 0 0  | 0 0 | 0 0 | 0 0 | 0 0 | 0 0 | 10.05 |
| IPR018652 | 0 | 26 0 0  | 0 0 | 0 0 | 0 0 | 0 0 | 0 0 | 47.05 |
| IPR018654 | 0 | 52 0 0  | 0 0 | 0 0 | 0 0 | 0 0 | 0 0 | 61.6  |
| IPR018662 | 0 | 5 0 0   | 0 0 | 0 0 | 0 0 | 0 0 | 0 0 | 49.33 |
| IPR018664 | 0 | 49 0 0  | 0 0 | 0 0 | 0 0 | 0 0 | 0 0 | 34.38 |
| IPR018666 | 0 | 70 0 0  | 0 0 | 0 0 | 0 0 | 0 0 | 0 0 | 10.09 |
| IPR018668 | 0 | 140 0 0 | 0 0 | 0 0 | 0 0 | 0 0 | 0 0 | 61.46 |
| IPR018671 | 0 | 40 0 0  | 0 0 | 0 0 | 0 0 | 0 0 | 0 0 | 63.78 |
| IPR018672 | 0 | 51 0 0  | 0 0 | 0 0 | 0 0 | 0 0 | 0 0 | 27.95 |
| IPR018674 | 0 | 66 0 0  | 0 0 | 0 0 | 0 0 | 0 0 | 0 0 | 5.33  |
| IPR018676 | 0 | 38 0 0  | 0 0 | 0 0 | 0 0 | 0 0 | 0 0 | 31.67 |
| IPR018678 | 0 | 73 0 0  | 0 0 | 0 0 | 0 0 | 0 0 | 0 0 | 44.64 |
| IPR018680 | 0 | 125 0 0 | 0 0 | 0 0 | 0 0 | 0 0 | 0 0 | 32.62 |
| IPR018681 | 0 | 54 0 0  | 0 0 | 0 0 | 0 0 | 0 0 | 0 0 | 32.7  |
| IPR018682 | 0 | 38 0 0  | 0 0 | 0 0 | 0 0 | 0 0 | 0 0 | 38.29 |
| IPR018685 | 0 | 32 0 0  | 0 0 | 0 0 | 0 0 | 0 0 | 0 0 | 26.25 |
| IPR018686 | 0 | 14 0 0  | 0 0 | 0 0 | 0 0 | 0 0 | 0 0 | 44.53 |
| IPR018687 | 0 | 72 0 0  | 0 0 | 0 0 | 0 0 | 0 0 | 0 0 | 35.01 |
| IPR018690 | 0 | 62 0 0  | 0 0 | 0 0 | 0 0 | 0 0 | 0 0 | 56.5  |
| IPR018691 | 0 | 75 0 0  | 0 0 | 0 0 | 0 0 | 0 0 | 0 0 | 25.19 |
| IPR018693 | 0 | 20 0 0  | 0 0 | 0 0 | 0 0 | 0 0 | 0 0 | 36.24 |
| IPR018694 | 0 | 13 0 0  | 0 0 | 0 0 | 0 0 | 0 0 | 0 0 | 70.07 |
| IPR018695 | 0 | 13 0 0  | 0 0 | 0 0 | 0 0 | 0 0 | 0 0 | 24.77 |
| IPR018696 | 0 | 18 0 0  | 0 0 | 0 0 | 0 0 | 0 0 | 0 0 | 36.8  |
| IPR018699 | 0 | 38 0 0  | 0 0 | 0 0 | 0 0 | 0 0 | 0 0 | 28.9  |
| IPR018700 | 0 | 18 0 0  | 0 0 | 0 0 | 0 0 | 0 0 | 0 0 | 38.04 |
| IPR018701 | 0 | 12 0 0  | 0 0 | 0 0 | 0 0 | 0 0 | 0 0 | 18.71 |
| IPR018706 | 0 | 78 0 0  | 0 0 | 0 0 | 0 0 | 0 0 | 0 0 | 32.82 |
| IPR018707 | 0 | 99 0 0  | 0 0 | 0 0 | 0 0 | 0 0 | 0 0 | 16.92 |
| IPR018714 | 0 | 119 0 0 | 0 0 | 0 0 | 0 0 | 0 0 | 0 0 | 54.7  |
| IPR018715 | 0 | 68 0 0  | 0 0 | 0 0 | 0 0 | 0 0 | 0 0 | 50.02 |
| IPR018716 | 0 | 17 0 0  | 0 0 | 0 0 | 0 0 | 0 0 | 0 0 | 28.05 |
| IPR018719 | 0 | 51 0 0  | 0 0 | 0 0 | 0 0 | 0 0 | 0 0 | 40.01 |
| IPR018721 | 0 | 153 0 0 | 0 0 | 0 0 | 0 0 | 0 0 | 0 0 | 21.01 |
| IPR018723 | 0 | 120 0 0 | 0 0 | 0 0 | 0 0 | 0 0 | 0 0 | 16.51 |
| IPR018728 | 0 | 76 0 0  | 0 0 | 0 0 | 0 0 | 0 0 | 0 0 | 17.75 |

|           |   |         |     |     |     |     |     |       |
|-----------|---|---------|-----|-----|-----|-----|-----|-------|
| IPR018729 | 0 | 114 0 0 | 0 0 | 0 0 | 0 0 | 0 0 | 0 0 | 19.75 |
| IPR018731 | 0 | 55 0 0  | 0 0 | 0 0 | 0 0 | 0 0 | 0 0 | 18.59 |
| IPR018732 | 0 | 40 0 0  | 0 0 | 0 0 | 0 0 | 0 0 | 0 0 | 27.76 |
| IPR018733 | 0 | 69 0 0  | 0 0 | 0 0 | 0 0 | 0 0 | 0 0 | 44.74 |
| IPR018735 | 0 | 65 0 0  | 0 0 | 0 0 | 0 0 | 0 0 | 0 0 | 52.02 |
| IPR018736 | 0 | 76 0 0  | 0 0 | 0 0 | 0 0 | 0 0 | 0 0 | 51.22 |
| IPR018741 | 0 | 68 0 0  | 0 0 | 0 0 | 0 0 | 0 0 | 0 0 | 40.46 |
| IPR018742 | 0 | 12 0 0  | 0 0 | 0 0 | 0 0 | 0 0 | 0 0 | 31.77 |
| IPR018747 | 0 | 22 0 0  | 0 0 | 0 0 | 0 0 | 0 0 | 0 0 | 35.67 |
| IPR018753 | 0 | 133 0 0 | 0 0 | 0 0 | 0 0 | 0 0 | 0 0 | 54.14 |
| IPR018757 | 0 | 28 0 0  | 0 0 | 0 0 | 0 0 | 0 0 | 0 0 | 48.23 |
| IPR018760 | 0 | 47 0 0  | 0 0 | 0 0 | 0 0 | 0 0 | 0 0 | 17.91 |
| IPR018766 | 0 | 132 0 0 | 0 0 | 0 0 | 0 0 | 0 0 | 0 0 | 27.65 |
| IPR018770 | 0 | 56 0 0  | 0 0 | 0 0 | 0 0 | 0 0 | 0 0 | 19.77 |
| IPR018772 | 0 | 39 0 0  | 0 0 | 0 0 | 0 0 | 0 0 | 0 0 | 38.2  |
| IPR018775 | 0 | 112 0 0 | 0 0 | 0 0 | 0 0 | 0 0 | 0 0 | 22.35 |
| IPR018784 | 0 | 27 0 0  | 0 0 | 0 0 | 0 0 | 0 0 | 0 0 | 41.72 |
| IPR018794 | 0 | 20 0 0  | 0 0 | 0 0 | 0 0 | 0 0 | 0 0 | 41    |
| IPR018797 | 0 | 46 0 0  | 0 0 | 0 0 | 0 0 | 0 0 | 0 0 | 39.05 |
| IPR018798 | 0 | 33 0 0  | 0 0 | 0 0 | 0 0 | 0 0 | 0 0 | 35.44 |
| IPR018801 | 0 | 29 0 0  | 0 0 | 0 0 | 0 0 | 0 0 | 0 0 | 47.58 |
| IPR018803 | 0 | 122 0 0 | 0 0 | 0 0 | 0 0 | 0 0 | 0 0 | 31.05 |
| IPR018814 | 0 | 31 0 0  | 0 0 | 0 0 | 0 0 | 0 0 | 0 0 | 40.37 |
| IPR018815 | 0 | 25 0 0  | 0 0 | 0 0 | 0 0 | 0 0 | 0 0 | 27.75 |
| IPR018824 | 0 | 40 0 0  | 0 0 | 0 0 | 0 0 | 0 0 | 0 0 | 42.55 |
| IPR018846 | 0 | 10 0 0  | 0 0 | 0 0 | 0 0 | 0 0 | 0 0 | 52.15 |
| IPR018854 | 0 | 10 0 0  | 0 0 | 0 0 | 0 0 | 0 0 | 0 0 | 16.17 |
| IPR018855 | 0 | 4 0 0   | 0 0 | 0 0 | 0 0 | 0 0 | 0 0 | 42.45 |
| IPR018859 | 0 | 35 0 0  | 0 0 | 0 0 | 0 0 | 0 0 | 0 0 | 50.31 |
| IPR018860 | 0 | 13 0 0  | 0 0 | 0 0 | 0 0 | 0 0 | 0 0 | 37.24 |
| IPR018862 | 0 | 54 0 0  | 0 0 | 0 0 | 0 0 | 0 0 | 0 0 | 19.19 |
| IPR018865 | 0 | 51 0 0  | 0 0 | 0 0 | 0 0 | 0 0 | 0 0 | 25.59 |
| IPR018867 | 0 | 49 0 0  | 0 0 | 0 0 | 0 0 | 0 0 | 0 0 | 31.14 |
| IPR018868 | 0 | 11 0 0  | 0 0 | 0 0 | 0 0 | 0 0 | 0 0 | 57.82 |
| IPR018887 | 0 | 9 0 0   | 0 0 | 0 0 | 0 0 | 0 0 | 0 0 | 66.46 |
| IPR018889 | 0 | 5 0 0   | 0 0 | 0 0 | 0 0 | 0 0 | 0 0 | 72.85 |
| IPR018893 | 0 | 73 0 0  | 0 0 | 0 0 | 0 0 | 0 0 | 0 0 | 46.79 |
| IPR018894 | 0 | 34 0 0  | 0 0 | 0 0 | 0 0 | 0 0 | 0 0 | 44.15 |
| IPR018895 | 0 | 60 0 0  | 0 0 | 0 0 | 0 0 | 0 0 | 0 0 | 44.48 |
| IPR018897 | 0 | 3 0 0   | 0 0 | 0 0 | 0 0 | 0 0 | 0 0 | 47.28 |
| IPR018898 | 0 | 4 0 0   | 0 0 | 0 0 | 0 0 | 0 0 | 0 0 | 87.79 |
| IPR018899 | 0 | 9 0 0   | 0 0 | 0 0 | 0 0 | 0 0 | 0 0 | 52.13 |
| IPR018900 | 0 | 71 0 0  | 0 0 | 0 0 | 0 0 | 0 0 | 0 0 | 48.07 |
| IPR018901 | 0 | 30 0 0  | 0 0 | 0 0 | 0 0 | 0 0 | 0 0 | 60.22 |
| IPR018902 | 0 | 77 0 0  | 0 0 | 0 0 | 0 0 | 0 0 | 0 0 | 29.06 |
| IPR018904 | 0 | 4 0 0   | 0 0 | 0 0 | 0 0 | 0 0 | 0 0 | 77.78 |
| IPR018908 | 0 | 62 0 0  | 0 0 | 0 0 | 0 0 | 0 0 | 0 0 | 31.77 |
| IPR018914 | 0 | 14 0 0  | 0 0 | 0 0 | 0 0 | 0 0 | 0 0 | 50.34 |
| IPR018917 | 0 | 14 0 0  | 0 0 | 0 0 | 0 0 | 0 0 | 0 0 | 73.59 |
| IPR018918 | 0 | 11 0 0  | 0 0 | 0 0 | 0 0 | 0 0 | 0 0 | 69.8  |
| IPR018919 | 0 | 10 0 0  | 0 0 | 0 0 | 0 0 | 0 0 | 0 0 | 40.62 |
| IPR018920 | 0 | 22 0 0  | 0 0 | 0 0 | 0 0 | 0 0 | 0 0 | 45.36 |
| IPR018921 | 0 | 22 0 0  | 0 0 | 0 0 | 0 0 | 0 0 | 0 0 | 44.09 |
| IPR018922 | 0 | 42 0 0  | 0 0 | 0 0 | 0 0 | 0 0 | 0 0 | 59.5  |
| IPR018924 | 0 | 20 0 0  | 0 0 | 0 0 | 0 0 | 0 0 | 0 0 | 45.15 |
| IPR018927 | 0 | 12 0 0  | 0 0 | 0 0 | 0 0 | 0 0 | 0 0 | 22.07 |
| IPR018943 | 0 | 51 0 0  | 0 0 | 0 0 | 0 0 | 0 0 | 0 0 | 47.66 |
| IPR018968 | 0 | 317 0 0 | 0 0 | 0 0 | 0 0 | 0 0 | 0 0 | 10.61 |
| IPR018981 | 0 | 26 0 0  | 0 0 | 0 0 | 0 0 | 0 0 | 0 0 | 86.28 |
| IPR018985 | 0 | 5 0 0   | 0 0 | 0 0 | 0 0 | 0 0 | 0 0 | 79.78 |
| IPR018987 | 0 | 4 0 0   | 0 0 | 0 0 | 0 0 | 0 0 | 0 0 | 50.27 |
| IPR018988 | 0 | 64 0 0  | 0 0 | 0 0 | 0 0 | 0 0 | 0 0 | 25.53 |
| IPR018989 | 0 | 46 0 0  | 0 0 | 0 0 | 0 0 | 0 0 | 0 0 | 24.46 |
| IPR018994 | 0 | 56 0 0  | 0 0 | 0 0 | 0 0 | 0 0 | 0 0 | 80.64 |
| IPR019004 | 0 | 492 0 0 | 0 0 | 0 0 | 0 0 | 0 0 | 0 0 | 35.2  |
| IPR019016 | 0 | 39 0 0  | 0 0 | 0 0 | 0 0 | 0 0 | 0 0 | 8.55  |
| IPR019027 | 0 | 61 0 0  | 0 0 | 0 0 | 0 0 | 0 0 | 0 0 | 25.05 |
| IPR019029 | 0 | 32 0 0  | 0 0 | 0 0 | 0 0 | 0 0 | 0 0 | 31.72 |
| IPR019034 | 0 | 53 0 0  | 0 0 | 0 0 | 0 0 | 0 0 | 0 0 | 28.25 |
| IPR019036 | 0 | 12 0 0  | 0 0 | 0 0 | 0 0 | 0 0 | 0 0 | 57.9  |
| IPR019045 | 0 | 12 0 0  | 0 0 | 0 0 | 0 0 | 0 0 | 0 0 | 29.57 |
| IPR019046 | 0 | 6 0 0   | 0 0 | 0 0 | 0 0 | 0 0 | 0 0 | 44.21 |
| IPR019051 | 0 | 57 0 0  | 0 0 | 0 0 | 0 0 | 0 0 | 0 0 | 22.13 |
| IPR019054 | 0 | 4 0 0   | 0 0 | 0 0 | 0 0 | 0 0 | 0 0 | 28.58 |
| IPR019058 | 0 | 5 0 0   | 0 0 | 0 0 | 0 0 | 0 0 | 0 0 | 66.2  |
| IPR019064 | 0 | 4 0 0   | 0 0 | 0 0 | 0 0 | 0 0 | 0 0 | 69.65 |
| IPR019070 | 0 | 3 0 0   | 0 0 | 0 0 | 0 0 | 0 0 | 0 0 | 46.62 |
| IPR019076 | 0 | 128 0 0 | 0 0 | 0 0 | 0 0 | 0 0 | 0 0 | 15.49 |
| IPR019088 | 0 | 60 0 0  | 0 0 | 0 0 | 0 0 | 0 0 | 0 0 | 32.11 |
| IPR019089 | 0 | 15 0 0  | 0 0 | 0 0 | 0 0 | 0 0 | 0 0 | 15.09 |
| IPR019094 | 0 | 7 0 0   | 0 0 | 0 0 | 0 0 | 0 0 | 0 0 | 17.21 |
| IPR019096 | 0 | 83 0 0  | 0 0 | 0 0 | 0 0 | 0 0 | 0 0 | 16.15 |
| IPR019117 | 0 | 65 0 0  | 0 0 | 0 0 | 0 0 | 0 0 | 0 0 | 7.2   |
| IPR019138 | 0 | 35 0 0  | 0 0 | 0 0 | 0 0 | 0 0 | 0 0 | 35.91 |
| IPR019142 | 0 | 41 0 0  | 0 0 | 0 0 | 0 0 | 0 0 | 0 0 | 37.24 |
| IPR019146 | 0 | 67 0 0  | 0 0 | 0 0 | 0 0 | 0 0 | 0 0 | 21.83 |
| IPR019149 | 0 | 82 0 0  | 0 0 | 0 0 | 0 0 | 0 0 | 0 0 | 24.62 |
| IPR019151 | 0 | 174 0 0 | 0 0 | 0 0 | 0 0 | 0 0 | 0 0 | 15.8  |
| IPR019160 | 0 | 83 0 0  | 0 0 | 0 0 | 0 0 | 0 0 | 0 0 | 22.95 |
| IPR019161 | 0 | 43 0 0  | 0 0 | 0 0 | 0 0 | 0 0 | 0 0 | 44.39 |
| IPR019166 | 0 | 75 0 0  | 0 0 | 0 0 | 0 0 | 0 0 | 0 0 | 14.29 |
| IPR019170 | 0 | 35 0 0  | 0 0 | 0 0 | 0 0 | 0 0 | 0 0 | 24.08 |
| IPR019171 | 0 | 53 0 0  | 0 0 | 0 0 | 0 0 | 0 0 | 0 0 | 31.92 |
| IPR019173 | 0 | 31 0 0  | 0 0 | 0 0 | 0 0 | 0 0 | 0 0 | 46.04 |
| IPR019174 | 0 | 34 0 0  | 0 0 | 0 0 | 0 0 | 0 0 | 0 0 | 39.36 |
| IPR019178 | 0 | 40 0 0  | 0 0 | 0 0 | 0 0 | 0 0 | 0 0 | 20.47 |
| IPR019179 | 0 | 32 0 0  | 0 0 | 0 0 | 0 0 | 0 0 | 0 0 | 46.13 |
| IPR019185 | 0 | 78 0 0  | 0 0 | 0 0 | 0 0 | 0 0 | 0 0 | 30.53 |
| IPR019187 | 0 | 49 0 0  | 0 0 | 0 0 | 0 0 | 0 0 | 1 1 | 35.71 |
| IPR019193 | 0 | 84 0 0  | 0 0 | 0 0 | 0 0 | 0 0 | 0 0 | 10.04 |
| IPR019195 | 0 | 77 0 0  | 0 0 | 0 0 | 0 0 | 0 0 | 0 0 | 35.85 |
| IPR019199 | 0 | 353 0 0 | 0 0 | 0 0 | 0 0 | 0 0 | 0 0 | 19.57 |
| IPR019201 | 0 | 196 0 0 | 0 0 | 0 0 | 0 0 | 0 0 | 0 0 | 32.5  |
| IPR019202 | 0 | 19 0 0  | 0 0 | 0 0 | 0 0 | 0 0 | 0 0 | 18.73 |
| IPR019208 | 0 | 8 0 0   | 0 0 | 0 0 | 0 0 | 0 0 | 0 0 | 33.65 |
| IPR019209 | 0 | 17 0 0  | 0 0 | 0 0 | 0 0 | 0 0 | 0 0 | 26.05 |
| IPR019210 | 0 | 6 0 0   | 0 0 | 0 0 | 0 0 | 0 0 | 0 0 | 57.3  |
| IPR019211 | 0 | 7 0 0   | 0 0 | 0 0 | 0 0 | 0 0 | 0 0 | 54.34 |
| IPR019212 | 0 | 10 0 0  | 0 0 | 0 0 | 0 0 | 0 0 | 0 0 | 51.47 |
| IPR019214 | 0 | 10 0 0  | 0 0 | 0 0 | 0 0 | 0 0 | 0 0 | 46.59 |
| IPR019215 | 0 | 28 0 0  | 0 0 | 0 0 | 0 0 | 0 0 | 0 0 | 21.71 |
| IPR019217 | 0 | 12 0 0  | 0 0 | 0 0 | 0 0 | 0 0 | 0 0 | 28.72 |
| IPR019218 | 0 | 8 0 0   | 0 0 | 0 0 | 0 0 | 0 0 | 0 0 | 41.85 |
| IPR019231 | 0 | 86 0 0  | 0 0 | 0 0 | 0 0 | 0 0 | 0 0 | 37.25 |
| IPR019232 | 0 | 34 0 0  | 0 0 | 0 0 | 0 0 | 0 0 | 0 0 | 36.72 |
| IPR019239 | 0 | 115 0 0 | 0 0 | 0 0 | 0 0 | 0 0 | 0 0 | 31.15 |
| IPR019241 | 0 | 55 0 0  | 0 0 | 0 0 | 0 0 | 0 0 | 0 0 | 45.51 |
| IPR019242 | 0 | 29 0 0  | 0 0 | 0 0 | 0 0 | 0 0 | 0 0 | 53.98 |
| IPR019250 | 0 | 60 0 0  | 0 0 | 0 0 | 0 0 | 0 0 | 0 0 | 29.22 |
| IPR019253 | 0 | 112 0 0 | 0 0 | 0 0 | 0 0 | 0 0 | 0 0 | 22.41 |
| IPR019263 | 0 | 38 0 0  | 0 0 | 0 0 | 0 0 | 0 0 | 0 0 | 45.46 |
| IPR019265 | 0 | 34 0 0  | 0 0 | 0 0 | 0 0 | 0 0 | 0 0 | 41.28 |
| IPR019266 | 0 | 37 0 0  | 0 0 | 0 0 | 0 0 | 0 0 | 0 0 | 22.21 |
| IPR019268 | 0 | 68 0 0  | 0 0 | 0 0 | 0 0 | 0 0 | 0 0 | 33.07 |
| IPR019276 | 0 | 36 0 0  | 0 0 | 0 0 | 0 0 | 0 0 | 0 0 | 30.76 |
| IPR019284 | 0 | 28 0 0  | 0 0 | 0 0 | 0 0 | 0 0 | 0 0 | 23.17 |
| IPR019285 | 0 | 141 0 0 | 0 0 | 0 0 | 0 0 | 0 0 | 0 0 | 11.25 |
| IPR019286 | 0 | 188 0 0 | 0 0 | 0 0 | 0 0 | 0 0 | 0 0 | 11.59 |
| IPR019288 | 0 | 130 0 0 | 0 0 | 0 0 | 0 0 | 0 0 | 0 0 | 34.81 |
| IPR019289 | 0 | 7 0 0   | 0 0 | 0 0 | 0 0 | 0 0 | 0 0 | 24.7  |
| IPR019294 | 0 | 20 0 0  | 0 0 | 0 0 | 0 0 | 0 0 | 0 0 | 36.38 |
| IPR019296 | 0 | 7 0 0   | 0 0 | 0 0 | 0 0 | 0 0 | 0 0 | 59.28 |
| IPR019298 | 0 | 18 0 0  | 0 0 | 0 0 | 0 0 | 0 0 | 0 0 | 19.21 |
| IPR019300 | 0 | 27 0 0  | 0 0 | 0 0 | 0 0 | 0 0 | 0 0 | 32.18 |
| IPR019311 | 0 | 24 0 0  | 0 0 | 0 0 | 0 0 | 0 0 | 0 0 | 50.33 |
| IPR019314 | 0 | 31 0 0  | 0 0 | 0 0 | 0 0 | 0 0 | 0 0 | 35.91 |
| IPR019318 | 0 | 63 0 0  | 0 0 | 0 0 | 0 0 | 0 0 | 0 0 | 27.72 |
| IPR019319 | 0 | 25 0 0  | 0 0 | 0 0 | 0 0 | 0 0 | 0 0 | 40.46 |
| IPR019320 | 0 | 33 0 0  | 0 0 | 0 0 | 0 0 | 0 0 | 0 0 | 33.05 |
| IPR019321 | 0 | 52 0 0  | 0 0 | 0 0 | 0 0 | 0 0 | 0 0 | 20.37 |
| IPR019322 | 0 | 25 0 0  | 0 0 | 0 0 | 0 0 | 0 0 | 0 0 | 36.87 |
| IPR019329 | 0 | 29 0 0  | 0 0 | 0 0 | 0 0 | 0 0 | 0 0 | 37.75 |
| IPR019330 | 0 | 33 0 0  | 0 0 | 0 0 | 0 0 | 0 0 | 0 0 | 58.1  |
| IPR019354 | 0 | 52 0 0  | 0 0 | 0 0 | 0 0 | 0 0 | 0 0 | 19.25 |
| IPR019355 | 0 | 32 0 0  | 0 0 | 0 0 | 0 0 | 0 0 | 0 0 | 45.44 |
| IPR019356 | 0 | 39 0 0  | 0 0 | 0 0 | 0 0 | 0 0 | 0 0 | 33.03 |
| IPR019357 | 0 | 62 0 0  | 0 0 | 0 0 | 0 0 | 0   |     |       |

|           |   |         |     |     |     |     |     |       |
|-----------|---|---------|-----|-----|-----|-----|-----|-------|
| IPRO19359 | 0 | 33 0 0  | 0 0 | 0 0 | 0 0 | 0 0 | 0 0 | 53.28 |
| IPRO19372 | 0 | 80 0 0  | 0 0 | 0 0 | 0 0 | 0 0 | 0 0 | 29.73 |
| IPRO19379 | 0 | 35 0 0  | 0 0 | 0 0 | 0 0 | 0 0 | 0 0 | 46.72 |
| IPRO19381 | 0 | 35 0 0  | 0 0 | 0 0 | 0 0 | 0 0 | 0 0 | 49.68 |
| IPRO19392 | 0 | 35 0 0  | 0 0 | 0 0 | 0 0 | 0 0 | 0 0 | 41.08 |
| IPRO19393 | 0 | 37 0 0  | 0 0 | 0 0 | 0 0 | 0 0 | 0 0 | 40.61 |
| IPRO19394 | 0 | 55 0 0  | 0 0 | 0 0 | 0 0 | 0 0 | 0 0 | 48.6  |
| IPRO19397 | 0 | 43 0 0  | 0 0 | 0 0 | 0 0 | 0 0 | 0 0 | 38.84 |
| IPRO19404 | 0 | 62 0 0  | 0 0 | 0 0 | 0 0 | 0 0 | 0 0 | 25.5  |
| IPRO19433 | 0 | 6 0 0   | 0 0 | 0 0 | 0 0 | 0 0 | 0 0 | 25.3  |
| IPRO19435 | 0 | 5 0 0   | 0 0 | 0 0 | 0 0 | 0 0 | 0 0 | 79.32 |
| IPRO19440 | 0 | 60 0 0  | 0 0 | 0 0 | 0 0 | 0 0 | 0 0 | 20.4  |
| IPRO19454 | 0 | 61 0 0  | 0 0 | 0 0 | 0 0 | 0 0 | 0 0 | 36.85 |
| IPRO19469 | 0 | 8 0 0   | 0 0 | 0 0 | 0 0 | 0 0 | 0 0 | 98.52 |
| IPRO19488 | 0 | 8 0 0   | 0 0 | 0 0 | 0 0 | 0 0 | 0 0 | 27.99 |
| IPRO19517 | 0 | 5 0 0   | 0 0 | 0 0 | 0 0 | 0 0 | 0 0 | 37.46 |
| IPRO19522 | 0 | 10 0 0  | 0 0 | 0 0 | 0 0 | 0 0 | 0 0 | 48.86 |
| IPRO19534 | 0 | 31 0 0  | 0 0 | 0 0 | 0 0 | 0 0 | 0 0 | 44.47 |
| IPRO19550 | 0 | 42 0 0  | 0 0 | 0 0 | 0 0 | 0 0 | 0 0 | 45.07 |
| IPRO19552 | 0 | 50 0 0  | 0 0 | 0 0 | 0 0 | 0 0 | 0 0 | 63.17 |
| IPRO19552 | 0 | 63 0 0  | 0 0 | 0 0 | 0 0 | 0 0 | 0 0 | 77.55 |
| IPRO19593 | 0 | 39 0 0  | 0 0 | 0 0 | 0 0 | 0 0 | 0 0 | 58.16 |
| IPRO19596 | 0 | 39 0 0  | 0 0 | 0 0 | 0 0 | 0 0 | 0 0 | 32.06 |
| IPRO19597 | 0 | 8 0 0   | 0 0 | 0 0 | 0 0 | 0 0 | 0 0 | 62.85 |
| IPRO19598 | 0 | 69 0 0  | 0 0 | 0 0 | 0 0 | 0 0 | 0 0 | 80.34 |
| IPRO19600 | 0 | 150 0 0 | 0 0 | 0 0 | 0 0 | 0 0 | 0 0 | 44.74 |
| IPRO19603 | 0 | 17 0 0  | 0 0 | 0 0 | 0 0 | 0 0 | 0 0 | 36.99 |
| IPRO19608 | 0 | 10 0 0  | 0 0 | 0 0 | 0 0 | 0 0 | 0 0 | 65.86 |
| IPRO19612 | 0 | 11 0 0  | 0 0 | 0 0 | 0 0 | 0 0 | 0 0 | 27.56 |
| IPRO19615 | 0 | 31 0 0  | 0 0 | 0 0 | 0 0 | 0 0 | 0 0 | 40.84 |
| IPRO19617 | 0 | 62 0 0  | 0 0 | 0 0 | 0 0 | 0 0 | 0 0 | 27.15 |
| IPRO19618 | 0 | 117 0 0 | 0 0 | 0 0 | 0 0 | 0 0 | 0 0 | 37    |
| IPRO19620 | 0 | 79 0 0  | 0 0 | 0 0 | 0 0 | 0 0 | 0 0 | 57.85 |
| IPRO19621 | 0 | 59 0 0  | 0 0 | 0 0 | 0 0 | 0 0 | 0 0 | 45.18 |
| IPRO19625 | 0 | 38 0 0  | 0 0 | 0 0 | 0 0 | 0 0 | 0 0 | 90.85 |
| IPRO19633 | 0 | 73 0 0  | 0 0 | 0 0 | 0 0 | 0 0 | 0 0 | 73.69 |
| IPRO19638 | 0 | 92 0 0  | 0 0 | 0 0 | 0 0 | 0 0 | 0 0 | 57.33 |
| IPRO19639 | 0 | 70 0 0  | 0 0 | 0 0 | 0 0 | 0 0 | 0 0 | 18.76 |
| IPRO19643 | 0 | 41 0 0  | 0 0 | 0 0 | 0 0 | 0 0 | 0 0 | 40.79 |
| IPRO19644 | 0 | 74 0 0  | 0 0 | 0 0 | 0 0 | 0 0 | 0 0 | 24    |
| IPRO19645 | 0 | 5 0 0   | 0 0 | 0 0 | 0 0 | 0 0 | 0 0 | 77.99 |
| IPRO19646 | 0 | 16 0 0  | 0 0 | 0 0 | 0 0 | 0 0 | 0 0 | 25.47 |
| IPRO19647 | 0 | 58 0 0  | 0 0 | 0 0 | 0 0 | 0 0 | 0 0 | 51.26 |
| IPRO19648 | 0 | 71 0 0  | 0 0 | 0 0 | 0 0 | 0 0 | 0 0 | 58.08 |
| IPRO19649 | 0 | 50 0 0  | 0 0 | 0 0 | 0 0 | 0 0 | 0 0 | 29.26 |
| IPRO19651 | 0 | 17 0 0  | 0 0 | 0 0 | 0 0 | 0 0 | 0 0 | 23.27 |
| IPRO19652 | 0 | 60 0 0  | 0 0 | 0 0 | 0 0 | 0 0 | 0 0 | 49.57 |
| IPRO19654 | 0 | 42 0 0  | 0 0 | 0 0 | 0 0 | 0 0 | 0 0 | 44.84 |
| IPRO19656 | 0 | 35 0 0  | 0 0 | 0 0 | 0 0 | 0 0 | 0 0 | 58.26 |
| IPRO19657 | 0 | 106 0 0 | 0 0 | 0 0 | 0 0 | 0 0 | 0 0 | 18.05 |
| IPRO19658 | 0 | 41 0 0  | 0 0 | 0 0 | 0 0 | 0 0 | 0 0 | 48.26 |
| IPRO19659 | 0 | 45 0 0  | 0 0 | 0 0 | 0 0 | 0 0 | 0 0 | 25.96 |
| IPRO19660 | 0 | 64 0 0  | 0 0 | 0 0 | 0 0 | 0 0 | 0 0 | 73.95 |
| IPRO19662 | 0 | 53 0 0  | 0 0 | 0 0 | 0 0 | 0 0 | 0 0 | 31.34 |
| IPRO19663 | 0 | 62 0 0  | 0 0 | 0 0 | 0 0 | 0 0 | 0 0 | 78.1  |
| IPRO19664 | 0 | 35 0 0  | 0 0 | 0 0 | 0 0 | 0 0 | 0 0 | 38.49 |
| IPRO19666 | 0 | 42 0 0  | 0 0 | 0 0 | 0 0 | 0 0 | 0 0 | 90.94 |
| IPRO19667 | 0 | 21 0 0  | 0 0 | 0 0 | 0 0 | 0 0 | 0 0 | 59.96 |
| IPRO19668 | 0 | 21 0 0  | 0 0 | 0 0 | 0 0 | 0 0 | 0 0 | 71.54 |
| IPRO19671 | 0 | 43 0 0  | 0 0 | 0 0 | 0 0 | 0 0 | 0 0 | 87.71 |
| IPRO19672 | 0 | 33 0 0  | 0 0 | 0 0 | 0 0 | 0 0 | 0 0 | 90.99 |
| IPRO19675 | 0 | 49 0 0  | 0 0 | 0 0 | 0 0 | 0 0 | 0 0 | 32.6  |
| IPRO19676 | 0 | 42 0 0  | 0 0 | 0 0 | 0 0 | 0 0 | 0 0 | 42.82 |
| IPRO19679 | 0 | 18 0 0  | 0 0 | 0 0 | 0 0 | 0 0 | 0 0 | 36.67 |
| IPRO19681 | 0 | 32 0 0  | 0 0 | 0 0 | 0 0 | 0 0 | 0 0 | 37.33 |
| IPRO19683 | 0 | 22 0 0  | 0 0 | 0 0 | 0 0 | 0 0 | 0 0 | 52.16 |
| IPRO19685 | 0 | 42 0 0  | 0 0 | 0 0 | 0 0 | 0 0 | 0 0 | 85.47 |
| IPRO19686 | 0 | 23 0 0  | 0 0 | 0 0 | 0 0 | 0 0 | 0 0 | 68.72 |
| IPRO19687 | 0 | 21 0 0  | 0 0 | 0 0 | 0 0 | 0 0 | 0 0 | 65.47 |
| IPRO19688 | 0 | 21 0 0  | 0 0 | 0 0 | 0 0 | 0 0 | 0 0 | 70.95 |
| IPRO19689 | 0 | 71 0 0  | 0 0 | 0 0 | 0 0 | 0 0 | 0 0 | 69.13 |
| IPRO19693 | 0 | 58 0 0  | 0 0 | 0 0 | 0 0 | 0 0 | 0 0 | 80.13 |
| IPRO19694 | 0 | 35 0 0  | 0 0 | 0 0 | 0 0 | 0 0 | 0 0 | 40.03 |
| IPRO19695 | 0 | 46 0 0  | 0 0 | 0 0 | 0 0 | 0 0 | 0 0 | 65.01 |
| IPRO19697 | 0 | 31 0 0  | 0 0 | 0 0 | 0 0 | 0 0 | 0 0 | 45.5  |
| IPRO19698 | 0 | 60 0 0  | 0 0 | 0 0 | 0 0 | 0 0 | 0 0 | 85.59 |
| IPRO19699 | 0 | 29 0 0  | 0 0 | 0 0 | 0 0 | 0 0 | 0 0 | 53.09 |
| IPRO19701 | 0 | 55 0 0  | 0 0 | 0 0 | 0 0 | 0 0 | 0 0 | 17.61 |
| IPRO19703 | 0 | 58 0 0  | 0 0 | 0 0 | 0 0 | 0 0 | 0 0 | 72.42 |
| IPRO19704 | 0 | 28 0 0  | 0 0 | 0 0 | 0 0 | 0 0 | 0 0 | 37.12 |
| IPRO19705 | 0 | 57 0 0  | 0 0 | 0 0 | 0 0 | 0 0 | 0 0 | 78.83 |
| IPRO19706 | 0 | 42 0 0  | 0 0 | 0 0 | 0 0 | 0 0 | 0 0 | 56.13 |
| IPRO19712 | 0 | 37 0 0  | 0 0 | 0 0 | 0 0 | 0 0 | 0 0 | 52.78 |
| IPRO19713 | 0 | 58 0 0  | 0 0 | 0 0 | 0 0 | 0 0 | 0 0 | 68.51 |
| IPRO19717 | 0 | 60 0 0  | 0 0 | 0 0 | 0 0 | 0 0 | 0 0 | 86.56 |
| IPRO19718 | 0 | 38 0 0  | 0 0 | 0 0 | 0 0 | 0 0 | 0 0 | 54.17 |
| IPRO19722 | 0 | 18 0 0  | 0 0 | 0 0 | 0 0 | 0 0 | 0 0 | 55.23 |
| IPRO19723 | 0 | 31 0 0  | 0 0 | 0 0 | 0 0 | 0 0 | 0 0 | 67.24 |
| IPRO19727 | 0 | 30 0 0  | 0 0 | 0 0 | 0 0 | 0 0 | 0 0 | 60.23 |
| IPRO19728 | 0 | 24 0 0  | 0 0 | 0 0 | 0 0 | 0 0 | 0 0 | 43.51 |
| IPRO19730 | 0 | 6 0 0   | 0 0 | 0 0 | 0 0 | 0 0 | 0 0 | 40.64 |
| IPRO19731 | 0 | 9 0 0   | 0 0 | 0 0 | 0 0 | 0 0 | 0 0 | 25.53 |
| IPRO19732 | 0 | 52 0 0  | 0 0 | 0 0 | 0 0 | 0 0 | 0 0 | 71.15 |
| IPRO19733 | 0 | 34 0 0  | 0 0 | 0 0 | 0 0 | 0 0 | 0 0 | 72.4  |
| IPRO19882 | 0 | 56 0 0  | 0 0 | 0 0 | 0 0 | 0 0 | 0 0 | 53.5  |
| IPRO19884 | 0 | 17 0 0  | 0 0 | 0 0 | 0 0 | 0 0 | 0 0 | 57.73 |
| IPRO19995 | 0 | 45 0 0  | 0 0 | 0 0 | 0 0 | 0 0 | 0 0 | 73.63 |
| IPRO20016 | 0 | 62 0 0  | 0 0 | 0 0 | 0 0 | 0 0 | 0 0 | 31.31 |
| IPRO20055 | 0 | 671 0 0 | 0 0 | 0 0 | 0 0 | 0 0 | 0 0 | 27.08 |
| IPRO20066 | 0 | 10 0 0  | 0 0 | 0 0 | 0 0 | 0 0 | 0 0 | 57.41 |
| IPRO20090 | 0 | 49 0 0  | 0 0 | 0 0 | 0 0 | 0 0 | 0 0 | 54.89 |
| IPRO20093 | 0 | 11 0 0  | 0 0 | 0 0 | 0 0 | 0 0 | 0 0 | 93.87 |
| IPRO20099 | 0 | 10 0 0  | 0 0 | 0 0 | 0 0 | 0 0 | 0 0 | 93.46 |
| IPRO20100 | 0 | 9 0 0   | 0 0 | 0 0 | 0 0 | 0 0 | 0 0 | 58.22 |
| IPRO20105 | 0 | 28 0 0  | 0 0 | 0 0 | 0 0 | 0 0 | 0 0 | 80.59 |
| IPRO20114 | 0 | 13 0 0  | 0 0 | 0 0 | 0 0 | 0 0 | 0 0 | 56.06 |
| IPRO20115 | 0 | 29 0 0  | 0 0 | 0 0 | 0 0 | 0 0 | 0 0 | 53.31 |
| IPRO20117 | 0 | 37 0 0  | 0 0 | 0 0 | 0 0 | 0 0 | 0 0 | 80.89 |
| IPRO20118 | 0 | 14 0 0  | 0 0 | 0 0 | 0 0 | 0 0 | 0 0 | 44.11 |
| IPRO20133 | 0 | 6 0 0   | 0 0 | 0 0 | 0 0 | 0 0 | 0 0 | 74.95 |
| IPRO20135 | 0 | 9 0 0   | 0 0 | 0 0 | 0 0 | 0 0 | 0 0 | 90.27 |
| IPRO20138 | 0 | 27 0 0  | 0 0 | 0 0 | 0 0 | 0 0 | 0 0 | 60.68 |
| IPRO20140 | 0 | 18 0 0  | 0 0 | 0 0 | 0 0 | 0 0 | 0 0 | 58.3  |
| IPRO20143 | 0 | 27 0 0  | 0 0 | 0 0 | 0 0 | 0 0 | 0 0 | 31.1  |
| IPRO20144 | 0 | 28 0 0  | 0 0 | 0 0 | 0 0 | 0 0 | 0 0 | 61.83 |
| IPRO20146 | 0 | 41 0 0  | 0 0 | 0 0 | 0 0 | 0 0 | 0 0 | 70.78 |
| IPRO20155 | 0 | 39 0 0  | 0 0 | 0 0 | 0 0 | 0 0 | 0 0 | 81.36 |
| IPRO20157 | 0 | 21 0 0  | 0 0 | 0 0 | 0 0 | 0 0 | 0 0 | 77.69 |
| IPRO20158 | 0 | 46 0 0  | 0 0 | 0 0 | 0 0 | 0 0 | 0 0 | 83.47 |
| IPRO20171 | 0 | 11 0 0  | 0 0 | 0 0 | 0 0 | 0 0 | 0 0 | 78.05 |
| IPRO20173 | 0 | 18 0 0  | 0 0 | 0 0 | 0 0 | 0 0 | 0 0 | 69.14 |
| IPRO20180 | 0 | 9 0 0   | 0 0 | 0 0 | 0 0 | 0 0 | 0 0 | 86.14 |
| IPRO20183 | 0 | 11 0 0  | 0 0 | 0 0 | 0 0 | 0 0 | 0 0 | 78.56 |
| IPRO20185 | 0 | 4 0 0   | 0 0 | 0 0 | 0 0 | 0 0 | 0 0 | 65.27 |
| IPRO20186 | 0 | 7 0 0   | 0 0 | 0 0 | 0 0 | 0 0 | 0 0 | 82.88 |
| IPRO20196 | 0 | 35 0 0  | 0 0 | 0 0 | 0 0 | 0 0 | 0 0 | 81.42 |
| IPRO20199 | 0 | 4 0 0   | 0 0 | 0 0 | 0 0 | 0 0 | 0 0 | 88.68 |
| IPRO20203 | 0 | 31 0 0  | 0 0 | 0 0 | 0 0 | 0 0 | 0 0 | 70.45 |
| IPRO20206 | 0 | 14 0 0  | 0 0 | 0 0 | 0 0 | 0 0 | 0 0 | 44.58 |
| IPRO20207 | 0 | 6 0 0   | 0 0 | 0 0 | 0 0 | 0 0 | 0 0 | 61.84 |
| IPRO20208 | 0 | 5 0 0   | 0 0 | 0 0 | 0 0 | 0 0 | 0 0 | 42.58 |
| IPRO20216 | 0 | 14 0 0  | 0 0 | 0 0 | 0 0 | 0 0 | 0 0 | 46.54 |
| IPRO20222 | 0 | 27 0 0  | 0 0 | 0 0 | 0 0 | 0 0 | 0 0 | 65.07 |
| IPRO20223 | 0 | 4 0 0   | 0 0 | 0 0 | 0 0 | 0 0 | 0 0 | 82.71 |
| IPRO20229 | 0 | 45 0 0  | 0 0 | 0 0 | 0 0 | 0 0 | 0 0 | 47.35 |
| IPRO20231 | 0 | 30 0 0  | 0 0 | 0 0 | 0 0 | 0 0 | 0 0 | 86.84 |
| IPRO20233 | 0 | 3 0 0   | 0 0 | 0 0 | 0 0 | 0 0 | 0 0 | 70.52 |
| IPRO20251 | 0 | 33 0 0  | 0 0 | 0 0 | 0 0 | 0 0 | 0 0 | 89.58 |
| IPRO20254 | 0 | 27 0 0  | 0 0 | 0 0 | 0 0 | 0 0 | 0 0 | 73.24 |
| IPRO20255 | 0 | 6 0 0   | 0 0 | 0 0 | 0 0 | 0 0 | 0 0 | 56.36 |
| IPRO20256 | 0 | 29 0 0  | 0 0 | 0 0 | 0 0 | 0 0 | 0 0 | 55.65 |
| IPRO20258 | 0 | 22 0 0  | 0 0 | 0 0 | 0 0 | 0 0 | 0 0 | 62.9  |
| IPRO20260 | 0 | 8 0 0   | 0 0 | 0 0 | 0 0 | 0 0 | 0 0 | 36.84 |
| IPRO20261 | 0 | 3 0 0   | 0 0 | 0 0 | 0 0 | 0 0 | 0 0 | 95.64 |
| IPRO20262 | 0 | 38 0 0  | 0 0 | 0 0 | 0 0 | 0 0 | 0 0 | 86.74 |
| IPRO20263 | 0 | 26 0 0  | 0 0 | 0 0 | 0 0 | 0 0 | 0 0 | 79.83 |
| IPRO20264 | 0 | 63 0 0  | 0 0 | 0 0 | 0 0 | 0 0 | 0 0 | 62.64 |

|          |   |     |   |   |   |   |   |   |       |
|----------|---|-----|---|---|---|---|---|---|-------|
| I        | 0 | 6   | 0 | 0 | 0 | 0 | 0 | 0 | 34.85 |
| PRO20271 | 0 | 58  | 0 | 0 | 0 | 0 | 0 | 0 | 80.4  |
| PRO20273 | 0 | 23  | 0 | 0 | 0 | 0 | 0 | 0 | 61.2  |
| PRO20277 | 0 | 12  | 0 | 0 | 0 | 0 | 0 | 0 | 33.83 |
| PRO20291 | 0 | 9   | 0 | 0 | 0 | 0 | 0 | 0 | 37.96 |
| PRO20292 | 0 | 6   | 0 | 0 | 0 | 0 | 0 | 0 | 61.44 |
| PRO20295 | 0 | 21  | 0 | 0 | 0 | 0 | 0 | 0 | 74.62 |
| PRO20296 | 0 | 4   | 0 | 0 | 0 | 0 | 0 | 0 | 53.16 |
| PRO20299 | 0 | 26  | 0 | 0 | 0 | 0 | 0 | 0 | 43.94 |
| PRO20309 | 0 | 35  | 0 | 0 | 0 | 0 | 0 | 0 | 50.01 |
| PRO20311 | 0 | 21  | 0 | 0 | 0 | 0 | 0 | 0 | 64.27 |
| PRO20314 | 0 | 7   | 0 | 0 | 0 | 0 | 0 | 0 | 86.09 |
| PRO20316 | 0 | 6   | 0 | 0 | 0 | 0 | 0 | 0 | 56.39 |
| PRO20325 | 0 | 5   | 0 | 0 | 0 | 0 | 0 | 0 | 38.18 |
| PRO20326 | 0 | 16  | 0 | 0 | 0 | 0 | 0 | 0 | 37.68 |
| PRO20327 | 0 | 8   | 0 | 0 | 0 | 0 | 0 | 0 | 83.99 |
| PRO20330 | 0 | 8   | 0 | 0 | 0 | 0 | 0 | 0 | 88.56 |
| PRO20332 | 0 | 10  | 0 | 0 | 0 | 0 | 0 | 0 | 77.88 |
| PRO20348 | 0 | 5   | 0 | 0 | 0 | 0 | 0 | 0 | 96.75 |
| PRO20351 | 0 | 21  | 0 | 0 | 0 | 0 | 0 | 0 | 53.47 |
| PRO20353 | 0 | 21  | 0 | 0 | 0 | 0 | 0 | 0 | 53.76 |
| PRO20354 | 0 | 48  | 0 | 0 | 0 | 0 | 0 | 0 | 57.58 |
| PRO20357 | 0 | 43  | 0 | 0 | 0 | 0 | 0 | 0 | 82.48 |
| PRO20359 | 0 | 4   | 0 | 0 | 0 | 0 | 0 | 0 | 53.23 |
| PRO20360 | 0 | 14  | 0 | 0 | 0 | 0 | 0 | 0 | 39.34 |
| PRO20362 | 0 | 14  | 0 | 0 | 0 | 0 | 0 | 0 | 39.34 |
| PRO20364 | 0 | 3   | 0 | 0 | 0 | 0 | 0 | 0 | 91.93 |
| PRO20368 | 0 | 51  | 0 | 0 | 0 | 0 | 0 | 0 | 73.72 |
| PRO20378 | 0 | 66  | 0 | 0 | 0 | 0 | 0 | 0 | 70.38 |
| PRO20386 | 0 | 36  | 0 | 0 | 0 | 0 | 0 | 0 | 66.75 |
| PRO20393 | 0 | 16  | 0 | 0 | 0 | 0 | 0 | 0 | 79.61 |
| PRO20397 | 0 | 3   | 0 | 0 | 0 | 0 | 0 | 0 | 58.2  |
| PRO20399 | 0 | 3   | 0 | 0 | 0 | 0 | 0 | 0 | 67.25 |
| PRO20438 | 0 | 10  | 0 | 0 | 0 | 0 | 0 | 0 | 37.78 |
| PRO20443 | 0 | 46  | 0 | 0 | 0 | 0 | 0 | 0 | 39.3  |
| PRO20483 | 0 | 107 | 0 | 0 | 0 | 0 | 0 | 0 | 47.34 |
| PRO20485 | 0 | 3   | 0 | 0 | 0 | 0 | 0 | 0 | 65.86 |
| PRO20487 | 0 | 17  | 0 | 0 | 0 | 0 | 0 | 0 | 34.34 |
| PRO20488 | 0 | 3   | 0 | 0 | 0 | 0 | 0 | 0 | 32.96 |
| PRO20489 | 0 | 59  | 0 | 0 | 0 | 0 | 0 | 0 | 75.1  |
| PRO20490 | 0 | 45  | 0 | 0 | 0 | 0 | 0 | 0 | 91.23 |
| PRO20492 | 0 | 4   | 0 | 0 | 0 | 0 | 0 | 0 | 83.51 |
| PRO20493 | 0 | 14  | 0 | 0 | 0 | 0 | 0 | 0 | 55.43 |
| PRO20496 | 0 | 3   | 0 | 0 | 0 | 0 | 0 | 0 | 85.46 |
| PRO20499 | 0 | 3   | 0 | 0 | 0 | 0 | 0 | 0 | 100   |
| PRO20500 | 0 | 14  | 0 | 0 | 0 | 0 | 0 | 0 | 91.84 |
| PRO20502 | 0 | 5   | 0 | 0 | 0 | 0 | 0 | 0 | 79.33 |
| PRO20505 | 0 | 5   | 0 | 0 | 0 | 0 | 0 | 0 | 69.93 |
| PRO20506 | 0 | 20  | 0 | 0 | 0 | 0 | 0 | 0 | 64.97 |
| PRO20508 | 0 | 11  | 0 | 0 | 0 | 0 | 0 | 0 | 30.3  |
| PRO20510 | 0 | 15  | 0 | 0 | 0 | 0 | 0 | 0 | 85.03 |
| PRO20513 | 0 | 45  | 0 | 0 | 0 | 0 | 0 | 0 | 87.96 |
| PRO20516 | 0 | 19  | 0 | 0 | 0 | 0 | 0 | 0 | 78.29 |
| PRO20517 | 0 | 4   | 0 | 0 | 0 | 0 | 0 | 0 | 56.62 |
| PRO20520 | 0 | 4   | 0 | 0 | 0 | 0 | 0 | 0 | 50.65 |
| PRO20524 | 0 | 11  | 0 | 0 | 0 | 0 | 0 | 0 | 88.53 |
| PRO20525 | 0 | 6   | 0 | 0 | 0 | 0 | 0 | 0 | 33.79 |
| PRO20528 | 0 | 12  | 0 | 0 | 0 | 0 | 0 | 0 | 81.9  |
| PRO20530 | 0 | 17  | 0 | 0 | 0 | 0 | 0 | 0 | 32.17 |
| PRO20532 | 0 | 11  | 0 | 0 | 0 | 0 | 0 | 0 | 68.87 |
| PRO20533 | 0 | 14  | 0 | 0 | 0 | 0 | 0 | 0 | 69.41 |
| PRO20581 | 0 | 11  | 0 | 0 | 0 | 0 | 0 | 0 | 36.36 |
| PRO20600 | 0 | 22  | 0 | 0 | 0 | 0 | 0 | 0 | 35.82 |
| PRO20603 | 0 | 988 | 0 | 0 | 0 | 0 | 0 | 0 | 19.6  |
| PRO20796 | 0 | 78  | 0 | 0 | 0 | 0 | 0 | 0 | 27.81 |
| PRO20799 | 0 | 14  | 0 | 0 | 0 | 0 | 0 | 0 | 59.77 |
| PRO20874 | 0 | 43  | 0 | 0 | 0 | 0 | 0 | 0 | 50.35 |
| PRO20905 | 0 | 44  | 0 | 0 | 0 | 0 | 0 | 0 | 51.88 |
| PRO20911 | 0 | 69  | 0 | 0 | 0 | 0 | 0 | 0 | 81.7  |
| PRO20950 | 0 | 82  | 0 | 0 | 0 | 0 | 0 | 0 | 35.99 |
| PRO20955 | 0 | 22  | 0 | 0 | 0 | 0 | 0 | 0 | 63.3  |
| PRO20965 | 0 | 6   | 0 | 0 | 0 | 0 | 0 | 0 | 35.04 |
| PRO20979 | 0 | 31  | 0 | 0 | 0 | 0 | 0 | 0 | 58.14 |
| PRO20987 | 0 | 12  | 0 | 0 | 0 | 0 | 0 | 0 | 57.68 |
| PRO20990 | 0 | 43  | 0 | 0 | 0 | 0 | 0 | 0 | 32.62 |
| PRO20991 | 0 | 29  | 0 | 0 | 0 | 0 | 0 | 0 | 18.46 |
| PRO20995 | 0 | 10  | 0 | 0 | 0 | 0 | 0 | 0 | 73.38 |
| PRO20998 | 0 | 4   | 0 | 0 | 0 | 0 | 0 | 0 | 40.9  |
| PRO21008 | 0 | 68  | 0 | 0 | 0 | 0 | 0 | 0 | 38.45 |
| PRO21011 | 0 | 22  | 0 | 0 | 0 | 0 | 0 | 0 | 45.01 |
| PRO21014 | 0 | 43  | 0 | 0 | 0 | 0 | 0 | 0 | 37.24 |
| PRO21048 | 0 | 8   | 0 | 0 | 0 | 0 | 0 | 0 | 97.31 |
| PRO21055 | 0 | 58  | 0 | 0 | 0 | 0 | 0 | 0 | 20.35 |
| PRO21067 | 0 | 31  | 0 | 0 | 0 | 0 | 0 | 0 | 29.22 |
| PRO21079 | 0 | 12  | 0 | 0 | 0 | 0 | 0 | 0 | 53.95 |
| PRO21080 | 0 | 12  | 0 | 0 | 0 | 0 | 0 | 0 | 29.68 |
| PRO21082 | 0 | 3   | 0 | 0 | 0 | 0 | 0 | 0 | 59.9  |
| PRO21088 | 0 | 11  | 0 | 0 | 0 | 0 | 0 | 0 | 59.02 |
| PRO21093 | 0 | 4   | 0 | 0 | 0 | 0 | 0 | 0 | 63.13 |
| PRO21098 | 0 | 20  | 0 | 0 | 0 | 0 | 0 | 0 | 45    |
| PRO21100 | 0 | 27  | 0 | 0 | 0 | 0 | 0 | 0 | 38.55 |
| PRO21111 | 0 | 10  | 0 | 0 | 0 | 0 | 0 | 0 | 52.48 |
| PRO21116 | 0 | 48  | 0 | 0 | 0 | 0 | 0 | 0 | 31.96 |
| PRO21123 | 0 | 117 | 0 | 0 | 0 | 0 | 0 | 0 | 15.57 |
| PRO21125 | 0 | 63  | 0 | 0 | 0 | 0 | 0 | 0 | 21.48 |
| PRO21126 | 0 | 17  | 0 | 0 | 0 | 0 | 0 | 0 | 64.02 |
| PRO21137 | 0 | 777 | 0 | 0 | 0 | 0 | 0 | 0 | 37.12 |
| PRO21140 | 0 | 44  | 0 | 0 | 0 | 0 | 0 | 0 | 18.95 |
| PRO21145 | 0 | 134 | 0 | 0 | 0 | 0 | 0 | 0 | 6.09  |
| PRO21146 | 0 | 210 | 0 | 0 | 0 | 0 | 0 | 0 | 10.68 |
| PRO21150 | 0 | 142 | 0 | 0 | 0 | 0 | 0 | 0 | 22.31 |
| PRO21156 | 0 | 29  | 0 | 0 | 0 | 0 | 0 | 0 | 32.73 |
| PRO21183 | 0 | 4   | 0 | 0 | 0 | 0 | 0 | 0 | 45.45 |
| PRO21216 | 0 | 16  | 0 | 0 | 0 | 0 | 0 | 0 | 15.1  |
| PRO21218 | 0 | 63  | 0 | 0 | 0 | 0 | 0 | 0 | 31.35 |
| PRO21220 | 0 | 26  | 0 | 0 | 0 | 0 | 0 | 0 | 65.75 |
| PRO21221 | 0 | 8   | 0 | 0 | 0 | 0 | 0 | 0 | 58.87 |
| PRO21233 | 0 | 52  | 0 | 0 | 0 | 0 | 0 | 0 | 55.59 |
| PRO21234 | 0 | 66  | 0 | 0 | 0 | 0 | 0 | 0 | 47.65 |
| PRO21238 | 0 | 33  | 0 | 0 | 0 | 0 | 0 | 0 | 74.39 |
| PRO21239 | 0 | 18  | 0 | 0 | 0 | 0 | 0 | 0 | 48.72 |
| PRO21240 | 0 | 28  | 0 | 0 | 0 | 0 | 0 | 0 | 76.77 |
| PRO21241 | 0 | 78  | 0 | 0 | 0 | 0 | 0 | 0 | 18.47 |
| PRO21248 | 0 | 44  | 0 | 0 | 0 | 0 | 0 | 0 | 32.61 |
| PRO21250 | 0 | 86  | 0 | 0 | 0 | 0 | 0 | 0 | 43.13 |
| PRO21253 | 0 | 50  | 0 | 0 | 0 | 0 | 0 | 0 | 29.17 |
| PRO21259 | 0 | 34  | 0 | 0 | 0 | 0 | 0 | 0 | 28.28 |
| PRO21260 | 0 | 56  | 0 | 0 | 0 | 0 | 0 | 0 | 37.88 |
| PRO21262 | 0 | 60  | 0 | 0 | 0 | 0 | 0 | 0 | 33.21 |
| PRO21263 | 0 | 66  | 0 | 0 | 0 | 0 | 0 | 0 | 52.8  |
| PRO21266 | 0 | 53  | 0 | 0 | 0 | 0 | 0 | 0 | 50.68 |
| PRO21268 | 0 | 63  | 0 | 0 | 0 | 0 | 0 | 0 | 24.67 |
| PRO21272 | 0 | 24  | 0 | 0 | 0 | 0 | 0 | 0 | 25.59 |
| PRO21273 | 0 | 49  | 0 | 0 | 0 | 0 | 0 | 0 | 44.87 |
| PRO21274 | 0 | 27  | 0 | 0 | 0 | 0 | 0 | 0 | 43.89 |
| PRO21279 | 0 | 126 | 0 | 0 | 0 | 0 | 0 | 0 | 19.87 |
| PRO21281 | 0 | 4   | 0 | 0 | 0 | 0 | 0 | 0 | 70.35 |
| PRO21283 | 0 | 38  | 0 | 0 | 0 | 0 | 0 | 0 | 18.45 |
| PRO21284 | 0 | 122 | 0 | 0 | 0 | 0 | 0 | 0 | 26.37 |
| PRO21290 | 0 | 14  | 0 | 0 | 0 | 0 | 0 | 0 | 33.4  |
| PRO21291 | 0 | 48  | 0 | 0 | 0 | 0 | 0 | 0 | 47.58 |
| PRO21292 | 0 | 37  | 0 | 0 | 0 | 0 | 0 | 0 | 60.83 |
| PRO21297 | 0 | 62  | 0 | 0 | 0 | 0 | 0 | 0 | 35.22 |
| PRO21299 | 0 | 52  | 0 | 0 | 0 | 0 | 0 | 0 | 47.54 |
| PRO21300 | 0 | 64  | 0 | 0 | 0 | 0 | 0 | 0 | 39.46 |
| PRO21302 | 0 | 51  | 0 | 0 | 0 | 0 | 0 | 0 | 33.97 |
| PRO21306 | 0 | 69  | 0 | 0 | 0 | 0 | 0 | 0 | 22.56 |
| PRO21307 | 0 | 109 | 0 | 0 | 0 | 0 | 0 | 0 | 30.63 |
| PRO21308 | 0 | 92  | 0 | 0 | 0 | 0 | 0 | 0 | 35.26 |
| PRO21313 | 0 | 104 | 0 | 0 | 0 | 0 | 0 | 0 | 36.11 |
| PRO21316 | 0 | 59  | 0 | 0 | 0 | 0 | 0 | 0 | 20.4  |
| PRO21318 | 0 | 78  | 0 | 0 | 0 | 0 | 0 | 0 | 36.74 |
| PRO21320 | 0 | 148 | 0 | 0 | 0 | 0 | 0 | 0 | 38.37 |
| PRO21321 | 0 | 121 | 0 | 0 | 0 | 0 | 0 | 0 | 23.72 |
| PRO21323 | 0 | 54  | 0 | 0 | 0 | 0 | 0 | 0 | 26.48 |
| PRO21324 | 0 | 63  | 0 | 0 | 0 | 0 | 0 | 0 | 30.88 |
| PRO21325 | 0 | 64  | 0 | 0 | 0 | 0 | 0 | 0 | 29.67 |
| PRO21326 | 0 | 44  | 0 | 0 | 0 | 0 | 0 | 0 | 18.24 |

|           |   |         |     |     |     |     |     |       |
|-----------|---|---------|-----|-----|-----|-----|-----|-------|
| IPRO21328 | 0 | 127 0 0 | 0 0 | 0 0 | 0 0 | 0 0 | 0 0 | 31.07 |
| IPRO21329 | 0 | 59 0 0  | 0 0 | 0 0 | 0 0 | 0 0 | 0 0 | 38.8  |
| IPRO21332 | 0 | 48 0 0  | 0 0 | 0 0 | 0 0 | 0 0 | 0 0 | 47.3  |
| IPRO21333 | 0 | 218 0 0 | 0 0 | 0 0 | 0 0 | 0 0 | 0 0 | 6.43  |
| IPRO21334 | 0 | 32 0 0  | 0 0 | 0 0 | 0 0 | 0 0 | 0 0 | 54.41 |
| IPRO21335 | 0 | 51 0 0  | 0 0 | 0 0 | 0 0 | 0 0 | 0 0 | 41.22 |
| IPRO21336 | 0 | 75 0 0  | 0 0 | 0 0 | 0 0 | 0 0 | 0 0 | 39.97 |
| IPRO21337 | 0 | 24 0 0  | 0 0 | 0 0 | 0 0 | 0 0 | 0 0 | 74.86 |
| IPRO21339 | 0 | 33 0 0  | 0 0 | 0 0 | 0 0 | 0 0 | 0 0 | 52.54 |
| IPRO21342 | 0 | 38 0 0  | 0 0 | 0 0 | 0 0 | 0 0 | 0 0 | 57.02 |
| IPRO21343 | 0 | 33 0 0  | 0 0 | 0 0 | 0 0 | 0 0 | 0 0 | 56.5  |
| IPRO21344 | 0 | 113 0 0 | 0 0 | 0 0 | 0 0 | 0 0 | 0 0 | 32.55 |
| IPRO21347 | 0 | 43 0 0  | 0 0 | 0 0 | 0 0 | 0 0 | 0 0 | 44.89 |
| IPRO21351 | 0 | 43 0 0  | 0 0 | 0 0 | 0 0 | 0 0 | 0 0 | 39.99 |
| IPRO21354 | 0 | 65 0 0  | 0 0 | 0 0 | 0 0 | 0 0 | 0 0 | 17.66 |
| IPRO21357 | 0 | 76 0 0  | 0 0 | 0 0 | 0 0 | 0 0 | 0 0 | 18.71 |
| IPRO21361 | 0 | 46 0 0  | 0 0 | 0 0 | 0 0 | 0 0 | 0 0 | 41.92 |
| IPRO21362 | 0 | 57 0 0  | 0 0 | 0 0 | 0 0 | 0 0 | 0 0 | 23.48 |
| IPRO21363 | 0 | 46 0 0  | 0 0 | 0 0 | 0 0 | 0 0 | 0 0 | 37.5  |
| IPRO21364 | 0 | 61 0 0  | 0 0 | 0 0 | 0 0 | 0 0 | 0 0 | 37.67 |
| IPRO21365 | 0 | 50 0 0  | 0 0 | 0 0 | 0 0 | 0 0 | 0 0 | 51.44 |
| IPRO21376 | 0 | 31 0 0  | 0 0 | 0 0 | 0 0 | 0 0 | 0 0 | 77.38 |
| IPRO21377 | 0 | 73 0 0  | 0 0 | 0 0 | 0 0 | 0 0 | 0 0 | 29.65 |
| IPRO21378 | 0 | 43 0 0  | 0 0 | 0 0 | 0 0 | 0 0 | 0 0 | 42.26 |
| IPRO21379 | 0 | 40 0 0  | 0 0 | 0 0 | 0 0 | 0 0 | 0 0 | 67.89 |
| IPRO21380 | 0 | 31 0 0  | 0 0 | 0 0 | 0 0 | 0 0 | 0 0 | 60.74 |
| IPRO21381 | 0 | 26 0 0  | 0 0 | 0 0 | 0 0 | 0 0 | 0 0 | 41.96 |
| IPRO21383 | 0 | 47 0 0  | 0 0 | 0 0 | 0 0 | 0 0 | 0 0 | 38.26 |
| IPRO21386 | 0 | 9 0 0   | 0 0 | 0 0 | 0 0 | 0 0 | 0 0 | 29.1  |
| IPRO21395 | 0 | 33 0 0  | 0 0 | 0 0 | 0 0 | 0 0 | 0 0 | 27.13 |
| IPRO21396 | 0 | 69 0 0  | 0 0 | 0 0 | 0 0 | 0 0 | 0 0 | 27.38 |
| IPRO21398 | 0 | 52 0 0  | 0 0 | 0 0 | 0 0 | 0 0 | 0 0 | 26.65 |
| IPRO21399 | 0 | 49 0 0  | 0 0 | 0 0 | 0 0 | 0 0 | 0 0 | 29.55 |
| IPRO21401 | 0 | 89 0 0  | 0 0 | 0 0 | 0 0 | 0 0 | 0 0 | 28.69 |
| IPRO21402 | 0 | 40 0 0  | 0 0 | 0 0 | 0 0 | 0 0 | 0 0 | 53.36 |
| IPRO21403 | 0 | 62 0 0  | 0 0 | 0 0 | 0 0 | 0 0 | 0 0 | 37.25 |
| IPRO21407 | 0 | 33 0 0  | 0 0 | 0 0 | 0 0 | 0 0 | 0 0 | 52.71 |
| IPRO21408 | 0 | 58 0 0  | 0 0 | 0 0 | 0 0 | 0 0 | 0 0 | 43.99 |
| IPRO21412 | 0 | 67 0 0  | 0 0 | 0 0 | 0 0 | 0 0 | 0 0 | 46.7  |
| IPRO21413 | 0 | 70 0 0  | 0 0 | 0 0 | 0 0 | 0 0 | 0 0 | 53.53 |
| IPRO21414 | 0 | 72 0 0  | 0 0 | 0 0 | 0 0 | 0 0 | 0 0 | 30.01 |
| IPRO21415 | 0 | 61 0 0  | 0 0 | 0 0 | 0 0 | 0 0 | 0 0 | 52.63 |
| IPRO21420 | 0 | 44 0 0  | 0 0 | 0 0 | 0 0 | 0 0 | 0 0 | 44.99 |
| IPRO21426 | 0 | 60 0 0  | 0 0 | 0 0 | 0 0 | 0 0 | 0 0 | 43.46 |
| IPRO21427 | 0 | 68 0 0  | 0 0 | 0 0 | 0 0 | 0 0 | 0 0 | 34.61 |
| IPRO21429 | 0 | 40 0 0  | 0 0 | 0 0 | 0 0 | 0 0 | 0 0 | 45.58 |
| IPRO21431 | 0 | 16 0 0  | 0 0 | 0 0 | 0 0 | 0 0 | 0 0 | 19.79 |
| IPRO21432 | 0 | 20 0 0  | 0 0 | 0 0 | 0 0 | 0 0 | 0 0 | 35.47 |
| IPRO21436 | 0 | 34 0 0  | 0 0 | 0 0 | 0 0 | 0 0 | 0 0 | 40.19 |
| IPRO21438 | 0 | 34 0 0  | 0 0 | 0 0 | 0 0 | 0 0 | 0 0 | 38.88 |
| IPRO21439 | 0 | 39 0 0  | 0 0 | 0 0 | 0 0 | 0 0 | 0 0 | 39.23 |
| IPRO21441 | 0 | 55 0 0  | 0 0 | 0 0 | 0 0 | 0 0 | 0 0 | 47.72 |
| IPRO21443 | 0 | 51 0 0  | 0 0 | 0 0 | 0 0 | 0 0 | 0 0 | 33.52 |
| IPRO21444 | 0 | 14 0 0  | 0 0 | 0 0 | 0 0 | 0 0 | 0 0 | 68.38 |
| IPRO21445 | 0 | 42 0 0  | 0 0 | 0 0 | 0 0 | 0 0 | 0 0 | 35.71 |
| IPRO21447 | 0 | 54 0 0  | 0 0 | 0 0 | 0 0 | 0 0 | 0 0 | 58.52 |
| IPRO21448 | 0 | 29 0 0  | 0 0 | 0 0 | 0 0 | 0 0 | 0 0 | 32.29 |
| IPRO21450 | 0 | 43 0 0  | 0 0 | 0 0 | 0 0 | 0 0 | 0 0 | 46.93 |
| IPRO21452 | 0 | 22 0 0  | 0 0 | 0 0 | 0 0 | 0 0 | 0 0 | 52.96 |
| IPRO21453 | 0 | 33 0 0  | 0 0 | 0 0 | 0 0 | 0 0 | 0 0 | 40.32 |
| IPRO21455 | 0 | 84 0 0  | 0 0 | 0 0 | 0 0 | 0 0 | 0 0 | 28.98 |
| IPRO21456 | 0 | 60 0 0  | 0 0 | 0 0 | 0 0 | 0 0 | 0 0 | 46.57 |
| IPRO21457 | 0 | 266 0 0 | 0 0 | 0 0 | 0 0 | 0 0 | 0 0 | 6.4   |
| IPRO21458 | 0 | 26 0 0  | 0 0 | 0 0 | 0 0 | 0 0 | 0 0 | 40.35 |
| IPRO21461 | 0 | 12 0 0  | 0 0 | 0 0 | 0 0 | 0 0 | 0 0 | 73.47 |
| IPRO21464 | 0 | 15 0 0  | 0 0 | 0 0 | 0 0 | 0 0 | 0 0 | 40.49 |
| IPRO21465 | 0 | 51 0 0  | 0 0 | 0 0 | 0 0 | 0 0 | 0 0 | 79.37 |
| IPRO21468 | 0 | 35 0 0  | 0 0 | 0 0 | 0 0 | 0 0 | 0 0 | 40.71 |
| IPRO21472 | 0 | 48 0 0  | 0 0 | 0 0 | 0 0 | 0 0 | 0 0 | 54.27 |
| IPRO21473 | 0 | 52 0 0  | 0 0 | 0 0 | 0 0 | 0 0 | 0 0 | 54.14 |
| IPRO21476 | 0 | 22 0 0  | 0 0 | 0 0 | 0 0 | 0 0 | 0 0 | 36.97 |
| IPRO21477 | 0 | 15 0 0  | 0 0 | 0 0 | 0 0 | 0 0 | 0 0 | 61.67 |
| IPRO21481 | 0 | 41 0 0  | 0 0 | 0 0 | 0 0 | 0 0 | 0 0 | 39.27 |
| IPRO21491 | 0 | 54 0 0  | 0 0 | 0 0 | 0 0 | 0 0 | 0 0 | 51.27 |
| IPRO21492 | 0 | 35 0 0  | 0 0 | 0 0 | 0 0 | 0 0 | 0 0 | 57.97 |
| IPRO21493 | 0 | 75 0 0  | 0 0 | 0 0 | 0 0 | 0 0 | 0 0 | 29.2  |
| IPRO21497 | 0 | 32 0 0  | 0 0 | 0 0 | 0 0 | 0 0 | 0 0 | 13.82 |
| IPRO21500 | 0 | 37 0 0  | 0 0 | 0 0 | 0 0 | 0 0 | 0 0 | 33.6  |
| IPRO21501 | 0 | 25 0 0  | 0 0 | 0 0 | 0 0 | 0 0 | 0 0 | 42.39 |
| IPRO21502 | 0 | 38 0 0  | 0 0 | 0 0 | 0 0 | 0 0 | 0 0 | 48.79 |
| IPRO21505 | 0 | 34 0 0  | 0 0 | 0 0 | 0 0 | 0 0 | 0 0 | 41.57 |
| IPRO21506 | 0 | 27 0 0  | 0 0 | 0 0 | 0 0 | 0 0 | 0 0 | 52.75 |
| IPRO21507 | 0 | 26 0 0  | 0 0 | 0 0 | 0 0 | 0 0 | 0 0 | 44.73 |
| IPRO21509 | 0 | 45 0 0  | 0 0 | 0 0 | 0 0 | 0 0 | 0 0 | 24.25 |
| IPRO21512 | 0 | 28 0 0  | 0 0 | 0 0 | 0 0 | 0 0 | 0 0 | 42.46 |
| IPRO21513 | 0 | 45 0 0  | 0 0 | 0 0 | 0 0 | 0 0 | 0 0 | 60.36 |
| IPRO21515 | 0 | 36 0 0  | 0 0 | 0 0 | 0 0 | 0 0 | 0 0 | 41.96 |
| IPRO21517 | 0 | 62 0 0  | 0 0 | 0 0 | 0 0 | 0 0 | 0 0 | 23.07 |
| IPRO21518 | 0 | 37 0 0  | 0 0 | 0 0 | 0 0 | 0 0 | 0 0 | 41.48 |
| IPRO21519 | 0 | 32 0 0  | 0 0 | 0 0 | 0 0 | 0 0 | 0 0 | 37.88 |
| IPRO21521 | 0 | 37 0 0  | 0 0 | 0 0 | 0 0 | 0 0 | 0 0 | 42.35 |
| IPRO21522 | 0 | 56 0 0  | 0 0 | 0 0 | 0 0 | 0 0 | 0 0 | 22.99 |
| IPRO21525 | 0 | 54 0 0  | 0 0 | 0 0 | 0 0 | 0 0 | 0 0 | 31.81 |
| IPRO21529 | 0 | 94 0 0  | 0 0 | 0 0 | 0 0 | 0 0 | 0 0 | 21.8  |
| IPRO21531 | 0 | 31 0 0  | 0 0 | 0 0 | 0 0 | 0 0 | 0 0 | 46.46 |
| IPRO21550 | 0 | 48 0 0  | 0 0 | 0 0 | 0 0 | 0 0 | 0 0 | 31.04 |
| IPRO21551 | 0 | 34 0 0  | 0 0 | 0 0 | 0 0 | 0 0 | 0 0 | 44.63 |
| IPRO21553 | 0 | 46 0 0  | 0 0 | 0 0 | 0 0 | 0 0 | 0 0 | 67.8  |
| IPRO21555 | 0 | 61 0 0  | 0 0 | 0 0 | 0 0 | 0 0 | 0 0 | 44.58 |
| IPRO21556 | 0 | 59 0 0  | 0 0 | 0 0 | 0 0 | 0 0 | 0 0 | 43.27 |
| IPRO21558 | 0 | 42 0 0  | 0 0 | 0 0 | 0 0 | 0 0 | 0 0 | 40.86 |
| IPRO21560 | 0 | 79 0 0  | 0 0 | 0 0 | 0 0 | 0 0 | 0 0 | 20.44 |
| IPRO21562 | 0 | 45 0 0  | 0 0 | 0 0 | 0 0 | 0 0 | 0 0 | 41.7  |
| IPRO21564 | 0 | 11 0 0  | 0 0 | 0 0 | 0 0 | 0 0 | 0 0 | 45.87 |
| IPRO21576 | 0 | 5 0 0   | 0 0 | 0 0 | 0 0 | 0 0 | 0 0 | 62.12 |
| IPRO21577 | 0 | 10 0 0  | 0 0 | 0 0 | 0 0 | 0 0 | 0 0 | 42.95 |
| IPRO21578 | 0 | 19 0 0  | 0 0 | 0 0 | 0 0 | 0 0 | 0 0 | 33.77 |
| IPRO21579 | 0 | 3 0 0   | 0 0 | 0 0 | 0 0 | 0 0 | 0 0 | 51.27 |
| IPRO21585 | 0 | 8 0 0   | 0 0 | 0 0 | 0 0 | 0 0 | 0 0 | 84.55 |
| IPRO21591 | 0 | 5 0 0   | 0 0 | 0 0 | 0 0 | 0 0 | 0 0 | 39.09 |
| IPRO21598 | 0 | 21 0 0  | 0 0 | 0 0 | 0 0 | 0 0 | 0 0 | 36.95 |
| IPRO21599 | 0 | 5 0 0   | 0 0 | 0 0 | 0 0 | 0 0 | 0 0 | 71.13 |
| IPRO21603 | 0 | 5 0 0   | 0 0 | 0 0 | 0 0 | 0 0 | 0 0 | 69.38 |
| IPRO21607 | 0 | 51 0 0  | 0 0 | 0 0 | 0 0 | 0 0 | 0 0 | 24.4  |
| IPRO21610 | 0 | 12 0 0  | 0 0 | 0 0 | 0 0 | 0 0 | 0 0 | 52.5  |
| IPRO21612 | 0 | 39 0 0  | 0 0 | 0 0 | 0 0 | 0 0 | 0 0 | 50.04 |
| IPRO21616 | 0 | 21 0 0  | 0 0 | 0 0 | 0 0 | 0 0 | 0 0 | 57.14 |
| IPRO21617 | 0 | 58 0 0  | 0 0 | 0 0 | 0 0 | 0 0 | 0 0 | 16.52 |
| IPRO21621 | 0 | 14 0 0  | 0 0 | 0 0 | 0 0 | 0 0 | 0 0 | 35.84 |
| IPRO21624 | 0 | 6 0 0   | 0 0 | 0 0 | 0 0 | 0 0 | 0 0 | 26.1  |
| IPRO21633 | 0 | 27 0 0  | 0 0 | 0 0 | 0 0 | 0 0 | 0 0 | 54.75 |
| IPRO21634 | 0 | 33 0 0  | 0 0 | 0 0 | 0 0 | 0 0 | 0 0 | 21.87 |
| IPRO21637 | 0 | 40 0 0  | 0 0 | 0 0 | 0 0 | 0 0 | 0 0 | 51.76 |
| IPRO21649 | 0 | 7 0 0   | 0 0 | 0 0 | 0 0 | 0 0 | 0 0 | 65.82 |
| IPRO21658 | 0 | 72 0 0  | 0 0 | 0 0 | 0 0 | 0 0 | 0 0 | 41.06 |
| IPRO21659 | 0 | 45 0 0  | 0 0 | 0 0 | 0 0 | 0 0 | 0 0 | 63.94 |
| IPRO21667 | 0 | 4 0 0   | 0 0 | 0 0 | 0 0 | 0 0 | 0 0 | 30.68 |
| IPRO21670 | 0 | 5 0 0   | 0 0 | 0 0 | 0 0 | 0 0 | 0 0 | 31.57 |
| IPRO21671 | 0 | 4 0 0   | 0 0 | 0 0 | 0 0 | 0 0 | 0 0 | 36.06 |
| IPRO21678 | 0 | 65 0 0  | 0 0 | 0 0 | 0 0 | 0 0 | 0 0 | 51.66 |
| IPRO21679 | 0 | 54 0 0  | 0 0 | 0 0 | 0 0 | 0 0 | 0 0 | 50.21 |
| IPRO21680 | 0 | 75 0 0  | 0 0 | 0 0 | 0 0 | 0 0 | 0 0 | 18.13 |
| IPRO21687 | 0 | 9 0 0   | 0 0 | 0 0 | 0 0 | 0 0 | 0 0 | 91.04 |
| IPRO21688 | 0 | 26 0 0  | 0 0 | 0 0 | 0 0 | 0 0 | 0 0 | 40.7  |
| IPRO21690 | 0 | 21 0 0  | 0 0 | 0 0 | 0 0 | 0 0 | 0 0 | 48.67 |
| IPRO21693 | 0 | 31 0 0  | 0 0 | 0 0 | 0 0 | 0 0 | 0 0 | 59.77 |
| IPRO21694 | 0 | 21 0 0  | 0 0 | 0 0 | 0 0 | 0 0 | 0 0 | 39.43 |
| IPRO21695 | 0 | 25 0 0  | 0 0 | 0 0 | 0 0 | 0 0 | 0 0 | 37    |
| IPRO21696 | 0 | 38 0 0  | 0 0 | 0 0 | 0 0 | 0 0 | 0 0 | 46.37 |
| IPRO21697 | 0 | 30 0 0  | 0 0 | 0 0 | 0 0 | 0 0 | 0 0 | 25.38 |
| IPRO21699 | 0 | 15 0 0  | 0 0 | 0 0 | 0 0 | 0 0 | 0 0 | 48.97 |
| IPRO21705 | 0 | 35 0 0  | 0 0 | 0 0 | 0 0 | 0 0 | 0 0 | 41.03 |
| IPRO21707 | 0 | 37 0 0  | 0 0 | 0 0 | 0 0 | 0 0 | 0 0 | 23.7  |
| IPRO21708 | 0 | 30 0 0  | 0 0 | 0 0 | 0 0 | 0 0 | 0 0 | 31.74 |
| IPRO21709 | 0 | 33 0 0  | 0 0 | 0 0 | 0 0 | 0 0 | 0 0 | 29.03 |
| IPRO21730 | 0 | 134 0 0 | 0 0 | 0 0 | 0 0 | 0 0 | 0 0 | 21.51 |
| IPRO21732 | 0 | 82 0 0  | 0 0 | 0 0 | 0 0 | 0 0 | 0 0 | 23.99 |

|            |   |         |     |     |     |     |     |       |
|------------|---|---------|-----|-----|-----|-----|-----|-------|
| IPRO21734  | 0 | 75 0 0  | 0 0 | 0 0 | 0 0 | 0 0 | 0 0 | 20.06 |
| IPRO21736  | 0 | 65 1 1  | 0 0 | 0 0 | 0 0 | 0 0 | 0 0 | 25.11 |
| IPRO21737  | 0 | 66 0 0  | 0 0 | 0 0 | 0 0 | 0 0 | 0 0 | 14.95 |
| IPRO21738  | 0 | 108 0 0 | 0 0 | 0 0 | 0 0 | 0 0 | 0 0 | 62.62 |
| IPRO21741  | 0 | 128 0 0 | 0 0 | 0 0 | 0 0 | 0 0 | 0 0 | 27.42 |
| IPRO21749  | 0 | 24 0 0  | 0 0 | 0 0 | 0 0 | 0 0 | 0 0 | 46.11 |
| IPRO21751  | 0 | 78 0 0  | 0 0 | 0 0 | 0 0 | 0 0 | 0 0 | 26.53 |
| IPRO21753  | 0 | 21 0 0  | 0 0 | 0 0 | 0 0 | 0 0 | 0 0 | 39.46 |
| IPRO21762  | 0 | 83 0 0  | 0 0 | 0 0 | 0 0 | 0 0 | 0 0 | 21.22 |
| IPRO21768  | 0 | 35 0 0  | 0 0 | 0 0 | 0 0 | 0 0 | 0 0 | 31.23 |
| IPRO21769  | 0 | 73 0 0  | 0 0 | 0 0 | 0 0 | 0 0 | 0 0 | 33.32 |
| IPRO21783  | 0 | 39 0 0  | 0 0 | 0 0 | 0 0 | 0 0 | 0 0 | 45.6  |
| IPRO21784  | 0 | 57 0 0  | 0 0 | 0 0 | 0 0 | 0 0 | 0 0 | 37.15 |
| IPRO21787  | 0 | 57 0 0  | 0 0 | 0 0 | 0 0 | 0 0 | 0 0 | 12.5  |
| IPRO21788  | 0 | 74 0 0  | 0 0 | 0 0 | 0 0 | 0 0 | 0 0 | 20.38 |
| IPRO21791  | 0 | 58 1 1  | 0 0 | 0 0 | 0 0 | 0 0 | 0 0 | 23.3  |
| IPRO21793  | 0 | 22 0 0  | 0 0 | 0 0 | 0 0 | 0 0 | 0 0 | 56.12 |
| IPRO21794  | 0 | 40 0 0  | 0 0 | 0 0 | 0 0 | 0 0 | 0 0 | 65.81 |
| IPRO21795  | 0 | 128 0 0 | 0 0 | 0 0 | 0 0 | 0 0 | 0 0 | 35.53 |
| IPRO21801  | 0 | 50 0 0  | 0 0 | 0 0 | 0 0 | 0 0 | 0 0 | 39.38 |
| IPRO21803  | 0 | 33 0 0  | 0 0 | 0 0 | 0 0 | 0 0 | 0 0 | 32.61 |
| IPRO21804  | 0 | 68 0 0  | 0 0 | 0 0 | 0 0 | 0 0 | 0 0 | 19.01 |
| IPRO21806  | 0 | 35 0 0  | 0 0 | 0 0 | 0 0 | 0 0 | 0 0 | 40.79 |
| IPRO21808  | 0 | 47 1 1  | 0 0 | 0 0 | 0 0 | 0 0 | 0 0 | 19.49 |
| IPRO21809  | 0 | 39 0 0  | 0 0 | 0 0 | 0 0 | 0 0 | 0 0 | 41.31 |
| IPRO21811  | 0 | 28 0 0  | 0 0 | 0 0 | 0 0 | 0 0 | 0 0 | 46.43 |
| IPRO21813  | 0 | 43 0 0  | 0 0 | 0 0 | 0 0 | 0 0 | 0 0 | 39.94 |
| IPRO21822  | 0 | 44 0 0  | 0 0 | 0 0 | 0 0 | 0 0 | 0 0 | 44.31 |
| IPRO21823  | 0 | 13 0 0  | 0 0 | 0 0 | 0 0 | 0 0 | 0 0 | 22.13 |
| IPRO21831  | 0 | 107 0 0 | 0 0 | 0 0 | 0 0 | 0 0 | 0 0 | 31.23 |
| IPRO21853  | 0 | 52 0 0  | 0 0 | 0 0 | 0 0 | 0 0 | 0 0 | 53.61 |
| IPRO21874  | 0 | 33 0 0  | 0 0 | 0 0 | 0 0 | 0 0 | 0 0 | 19.36 |
| IPRO21877  | 0 | 55 0 0  | 0 0 | 0 0 | 0 0 | 0 0 | 0 0 | 37.08 |
| IPRO21879  | 0 | 33 0 0  | 0 0 | 0 0 | 0 0 | 0 0 | 0 0 | 29.03 |
| IPRO21880  | 0 | 34 0 0  | 0 0 | 0 0 | 0 0 | 0 0 | 0 0 | 39.76 |
| IPRO21888  | 0 | 57 0 0  | 0 0 | 0 0 | 0 0 | 0 0 | 0 0 | 50.7  |
| IPRO21889  | 0 | 36 0 0  | 0 0 | 0 0 | 0 0 | 0 0 | 0 0 | 22.49 |
| IPRO21890  | 0 | 43 0 0  | 0 0 | 1 1 | 0 0 | 0 0 | 0 0 | 39.06 |
| IPRO21898  | 0 | 50 0 0  | 0 0 | 0 0 | 0 0 | 0 0 | 0 0 | 25.56 |
| IPRO21902  | 0 | 40 0 0  | 0 0 | 0 0 | 0 0 | 0 0 | 0 0 | 9.58  |
| IPRO21903  | 0 | 64 0 0  | 0 0 | 0 0 | 0 0 | 0 0 | 0 0 | 22.69 |
| IPRO21907  | 0 | 34 0 0  | 0 0 | 0 0 | 0 0 | 0 0 | 0 0 | 29.38 |
| IPRO21919  | 0 | 48 0 0  | 0 0 | 0 0 | 0 0 | 0 0 | 0 0 | 32.05 |
| IPRO21920  | 0 | 55 0 0  | 0 0 | 0 0 | 0 0 | 0 0 | 0 0 | 48.27 |
| IPRO21921  | 0 | 74 0 0  | 0 0 | 0 0 | 0 0 | 0 0 | 0 0 | 26.79 |
| IPRO21926  | 0 | 35 0 0  | 0 0 | 0 0 | 0 0 | 0 0 | 0 0 | 51.52 |
| IPRO21927  | 0 | 47 0 0  | 0 0 | 0 0 | 0 0 | 0 0 | 0 0 | 24.23 |
| IPRO21932  | 0 | 34 0 0  | 0 0 | 0 0 | 0 0 | 0 0 | 0 0 | 48.6  |
| IPRO21936  | 0 | 37 0 0  | 0 0 | 0 0 | 0 0 | 0 0 | 0 0 | 43.77 |
| IPRO21937  | 0 | 49 0 0  | 0 0 | 0 0 | 0 0 | 0 0 | 0 0 | 27.9  |
| IPRO21941  | 0 | 32 0 0  | 0 0 | 0 0 | 0 0 | 0 0 | 0 0 | 54.8  |
| IPRO21945  | 0 | 29 0 0  | 0 0 | 0 0 | 0 0 | 0 0 | 0 0 | 36.07 |
| IPRO21946  | 0 | 45 0 0  | 0 0 | 0 0 | 0 0 | 0 0 | 0 0 | 45.34 |
| IPRO21947  | 0 | 32 0 0  | 0 0 | 0 0 | 0 0 | 0 0 | 0 0 | 49.12 |
| IPRO21949  | 0 | 62 0 0  | 0 0 | 0 0 | 0 0 | 0 0 | 0 0 | 42.73 |
| IPRO21951  | 0 | 39 0 0  | 0 0 | 0 0 | 0 0 | 0 0 | 0 0 | 56.26 |
| IPRO21952  | 0 | 50 0 0  | 0 0 | 0 0 | 0 0 | 0 0 | 0 0 | 27.99 |
| IPRO21953  | 0 | 45 0 0  | 0 0 | 0 0 | 0 0 | 0 0 | 0 0 | 22.53 |
| IPRO21955  | 0 | 52 0 0  | 0 0 | 0 0 | 0 0 | 0 0 | 0 0 | 34.02 |
| IPRO21960  | 0 | 71 0 0  | 0 0 | 0 0 | 0 0 | 0 0 | 0 0 | 46.72 |
| IPRO21974  | 0 | 34 0 0  | 0 0 | 0 0 | 0 0 | 0 0 | 0 0 | 57.12 |
| IPRO21980  | 0 | 41 0 0  | 0 0 | 0 0 | 0 0 | 0 0 | 0 0 | 54.17 |
| IPRO22024  | 0 | 68 0 0  | 0 0 | 0 0 | 0 0 | 0 0 | 0 0 | 21.5  |
| IPRO22028  | 0 | 16 0 0  | 0 0 | 0 0 | 0 0 | 0 0 | 0 0 | 35.15 |
| IPRO22037  | 0 | 70 0 0  | 0 0 | 0 0 | 0 0 | 0 0 | 0 0 | 22.12 |
| IPRO22050  | 0 | 37 0 0  | 0 0 | 0 0 | 0 0 | 0 0 | 0 0 | 28.22 |
| IPRO22057  | 0 | 48 0 0  | 0 0 | 0 0 | 0 0 | 0 0 | 0 0 | 42.54 |
| IPRO22061  | 0 | 76 0 0  | 0 0 | 0 0 | 0 0 | 0 0 | 0 0 | 12.5  |
| IPRO22064  | 0 | 47 0 0  | 0 0 | 0 0 | 0 0 | 0 0 | 0 0 | 38.59 |
| IPRO22072  | 0 | 25 0 0  | 0 0 | 0 0 | 0 0 | 0 0 | 0 0 | 52.11 |
| IPRO22080  | 0 | 32 0 0  | 0 0 | 0 0 | 0 0 | 0 0 | 0 0 | 42.02 |
| IPRO22090  | 0 | 28 0 0  | 0 0 | 0 0 | 0 0 | 0 0 | 0 0 | 47.04 |
| IPRO22110  | 0 | 115 0 0 | 0 0 | 0 0 | 0 0 | 0 0 | 0 0 | 16.65 |
| IPRO222121 | 0 | 60 0 0  | 0 0 | 0 0 | 0 0 | 0 0 | 0 0 | 43.1  |
| IPRO222124 | 0 | 140 0 0 | 0 0 | 0 0 | 0 0 | 0 0 | 0 0 | 36    |
| IPRO222155 | 0 | 27 0 0  | 0 0 | 0 0 | 0 0 | 1 1 | 0 0 | 46.61 |
| IPRO222174 | 0 | 44 0 0  | 0 0 | 0 0 | 0 0 | 0 0 | 0 0 | 39.31 |
| IPRO22207  | 0 | 38 0 0  | 0 0 | 0 0 | 0 0 | 0 0 | 0 0 | 34.35 |
| IPRO22217  | 0 | 5 0 0   | 0 0 | 0 0 | 0 0 | 0 0 | 0 0 | 35.41 |
| IPRO22224  | 0 | 31 0 0  | 0 0 | 0 0 | 0 0 | 0 0 | 0 0 | 45.59 |
| IPRO22231  | 0 | 32 1 1  | 0 0 | 0 0 | 0 0 | 0 0 | 0 0 | 24.48 |
| IPRO22236  | 0 | 38 0 0  | 0 0 | 0 0 | 0 0 | 0 0 | 0 0 | 56.85 |
| IPRO22240  | 0 | 34 0 0  | 0 0 | 0 0 | 0 0 | 0 0 | 0 0 | 35.2  |
| IPRO22253  | 0 | 25 0 0  | 0 0 | 0 0 | 0 0 | 0 0 | 0 0 | 55.64 |
| IPRO22278  | 0 | 4 0 0   | 0 0 | 0 0 | 0 0 | 0 0 | 0 0 | 68.48 |
| MF_00039   | 0 | 3 0 0   | 0 0 | 0 0 | 0 0 | 0 0 | 0 0 | 46.75 |
| MF_00067   | 0 | 34 0 0  | 0 0 | 0 0 | 0 0 | 0 0 | 0 0 | 43.66 |
| MF_00068   | 0 | 25 0 0  | 0 0 | 0 0 | 0 0 | 0 0 | 0 0 | 51.27 |
| MF_00081   | 0 | 8 0 0   | 0 0 | 0 0 | 0 0 | 0 0 | 0 0 | 94    |
| MF_00088   | 0 | 70 0 0  | 0 0 | 0 0 | 0 0 | 0 0 | 0 0 | 49.04 |
| MF_00215   | 0 | 16 0 0  | 0 0 | 0 0 | 0 0 | 0 0 | 0 0 | 69.93 |
| MF_00146   | 0 | 37 0 0  | 0 0 | 0 0 | 0 0 | 0 0 | 0 0 | 41.01 |
| MF_00220_8 | 0 | 20 0 0  | 0 0 | 0 0 | 0 0 | 0 0 | 0 0 | 55.96 |
| MF_00234   | 0 | 11 0 0  | 0 0 | 0 0 | 0 0 | 0 0 | 0 0 | 61.38 |
| MF_00237   | 0 | 91 0 0  | 0 0 | 0 0 | 0 0 | 0 0 | 0 0 | 43.49 |
| MF_00251   | 0 | 7 0 0   | 0 0 | 0 0 | 0 0 | 0 0 | 0 0 | 64.17 |
| MF_00261   | 0 | 7 0 0   | 0 0 | 0 0 | 0 0 | 0 0 | 0 0 | 28.35 |
| MF_00311   | 0 | 10 0 0  | 0 0 | 0 0 | 0 0 | 0 0 | 0 0 | 31.49 |
| MF_00387   | 0 | 26 0 0  | 0 0 | 0 0 | 0 0 | 0 0 | 0 0 | 53.46 |
| MF_00422   | 0 | 5 0 0   | 0 0 | 0 0 | 0 0 | 0 0 | 0 0 | 28.6  |
| MF_00538   | 0 | 35 0 0  | 0 0 | 0 0 | 0 0 | 0 0 | 0 0 | 85.04 |
| MF_00546   | 0 | 5 0 0   | 0 0 | 0 0 | 0 0 | 0 0 | 0 0 | 73.88 |
| MF_00565   | 0 | 5 0 0   | 0 0 | 0 0 | 0 0 | 0 0 | 0 0 | 76    |
| MF_00575   | 0 | 8 0 0   | 0 0 | 0 0 | 0 0 | 0 0 | 0 0 | 42.88 |
| MF_00612   | 0 | 22 0 0  | 0 0 | 0 0 | 0 0 | 0 0 | 0 0 | 46.36 |
| MF_00653   | 0 | 45 0 0  | 0 0 | 0 0 | 0 0 | 0 0 | 0 0 | 50.47 |
| MF_00669   | 0 | 17 0 0  | 0 0 | 0 0 | 0 0 | 0 0 | 0 0 | 78.96 |
| MF_00788   | 0 | 7 0 0   | 0 0 | 0 0 | 0 0 | 0 0 | 0 0 | 57.81 |
| MF_01012   | 0 | 3 0 0   | 0 0 | 0 0 | 0 0 | 0 0 | 0 0 | 99.22 |
| MF_01061   | 0 | 38 0 0  | 0 0 | 0 0 | 0 0 | 0 0 | 0 0 | 88.17 |
| MF_01111   | 0 | 13 0 0  | 0 0 | 0 0 | 0 0 | 0 0 | 0 0 | 37.85 |
| MF_01145   | 0 | 17 0 0  | 0 0 | 0 0 | 0 0 | 0 0 | 0 0 | 53.09 |
| MF_01155   | 0 | 44 0 0  | 0 0 | 0 0 | 0 0 | 0 0 | 0 0 | 68.04 |
| MF_01157   | 0 | 4 0 0   | 0 0 | 0 0 | 0 0 | 0 0 | 0 0 | 100   |
| MF_01158   | 0 | 3 0 0   | 0 0 | 0 0 | 0 0 | 0 0 | 0 0 | 100   |
| MF_01170   | 0 | 6 0 0   | 0 0 | 0 0 | 0 0 | 0 0 | 0 0 | 42.48 |
| MF_01191   | 0 | 8 0 0   | 0 0 | 0 0 | 0 0 | 0 0 | 0 0 | 83.26 |
| MF_01195   | 0 | 6 0 0   | 0 0 | 0 0 | 0 0 | 0 0 | 0 0 | 99.46 |
| MF_01199   | 0 | 3 0 0   | 0 0 | 0 0 | 0 0 | 0 0 | 0 0 | 28.48 |
| MF_01229   | 0 | 4 0 0   | 0 0 | 0 0 | 0 0 | 0 0 | 0 0 | 85.04 |
| MF_01240   | 0 | 8 0 0   | 0 0 | 0 0 | 0 0 | 0 0 | 0 0 | 39.78 |
| MF_01256   | 0 | 4 0 0   | 0 0 | 0 0 | 0 0 | 0 0 | 0 0 | 47.17 |
| MF_01266   | 0 | 37 0 0  | 0 0 | 0 0 | 0 0 | 0 0 | 0 0 | 98.65 |
| MF_01282   | 0 | 4 0 0   | 0 0 | 0 0 | 0 0 | 0 0 | 0 0 | 85.75 |
| MF_01299   | 0 | 9 0 0   | 0 0 | 0 0 | 0 0 | 0 0 | 0 0 | 61.18 |
| MF_01360   | 0 | 34 0 0  | 0 0 | 0 0 | 0 0 | 0 0 | 0 0 | 50.04 |
| MF_01362   | 0 | 22 0 0  | 0 0 | 0 0 | 0 0 | 0 0 | 0 0 | 96.34 |
| MF_01372   | 0 | 3 0 0   | 0 0 | 0 0 | 0 0 | 0 0 | 0 0 | 99.3  |
| MF_01421   | 0 | 11 0 0  | 0 0 | 0 0 | 0 0 | 0 0 | 0 0 | 76.08 |
| MF_01435   | 0 | 44 0 0  | 0 0 | 0 0 | 0 0 | 0 0 | 0 0 | 78.66 |
| MF_01506   | 0 | 9 0 0   | 0 0 | 0 0 | 0 0 | 0 0 | 0 0 | 96.61 |
| MF_01519   | 0 | 7 0 0   | 0 0 | 0 0 | 0 0 | 0 0 | 0 0 | 92.9  |
| MF_01525   | 0 | 35 0 0  | 0 0 | 0 0 | 0 0 | 0 0 | 0 0 | 93.38 |
| MF_01565   | 0 | 3 0 0   | 0 0 | 0 0 | 0 0 | 0 0 | 0 0 | 100   |
| MF_01566   | 0 | 55 0 0  | 0 0 | 0 0 | 0 0 | 0 0 | 0 0 | 87.28 |
| MF_01583   | 0 | 3 0 0   | 0 0 | 0 0 | 0 0 | 0 0 | 0 0 | 100   |
| MF_01596   | 0 | 40 0 0  | 0 0 | 0 0 | 0 0 | 0 0 | 0 0 | 92.43 |
| MF_01622   | 0 | 7 0 0   | 0 0 | 0 0 | 0 0 | 0 0 | 0 0 | 82.14 |
| MF_01641   | 0 | 30 0 0  | 0 0 | 0 0 | 0 0 | 0 0 | 0 0 | 83.99 |
| MF_01658   | 0 | 3 0 0   | 0 0 | 0 0 | 0 0 | 0 0 | 0 0 | 58.25 |
| MF_01681   | 0 | 3 0 0   | 0 0 | 0 0 | 0 0 | 0 0 | 0 0 | 38.18 |
| MF_01812   | 0 | 5 0 0   | 0 0 | 0 0 | 0 0 | 0 0 | 0 0 | 71.36 |
| MF_01817   | 0 | 4 0 0   | 0 0 | 0 0 | 0 0 | 0 0 | 0 0 | 73.57 |
| MF_01861   | 0 | 36 0 0  | 0 0 | 0 0 | 0 0 | 0 0 | 0 0 | 54.15 |
| MF_02010   | 0 | 3 0 0   | 0 0 | 0 0 | 0 0 | 0 0 | 0 0 | 98.91 |
| PD002844   | 0 | 71 0 0  | 0 0 | 0 0 | 0 0 | 0 0 | 0 0 | 47.15 |
| PD012572   | 0 | 5 0 0   | 0 0 | 0 0 | 0 0 | 0 0 | 0 0 | 90.94 |

|           |   |        |     |     |     |     |     |        |
|-----------|---|--------|-----|-----|-----|-----|-----|--------|
| PD0112638 | 0 | 5 0 0  | 0 0 | 0 0 | 0 0 | 0 0 | 0 0 | 86.75  |
| PD0116359 | 0 | 9 0 0  | 0 0 | 0 0 | 0 0 | 0 0 | 0 0 | 66.22  |
| PD0119538 | 0 | 4 0 0  | 0 0 | 0 0 | 0 0 | 0 0 | 0 0 | 83.63  |
| PD0200932 | 0 | 7 0 0  | 0 0 | 0 0 | 0 0 | 0 0 | 0 0 | 62.97  |
| PD0200942 | 0 | 42 0 0 | 0 0 | 0 0 | 0 0 | 0 0 | 0 0 | 27.68  |
| PD022058  | 0 | 9 0 0  | 0 0 | 0 0 | 0 0 | 0 0 | 0 0 | 90.78  |
| PD0223267 | 0 | 4 0 0  | 0 0 | 0 0 | 0 0 | 0 0 | 0 0 | 67.85  |
| PD024016  | 0 | 27 0 0 | 0 0 | 0 0 | 0 0 | 0 0 | 0 0 | 35.54  |
| PD024222  | 0 | 3 0 0  | 0 0 | 0 0 | 0 0 | 0 0 | 0 0 | 57.67  |
| PD026230  | 0 | 6 0 0  | 0 0 | 0 0 | 0 0 | 0 0 | 0 0 | 76.38  |
| PD026569  | 0 | 14 0 0 | 0 0 | 0 0 | 0 0 | 0 0 | 0 0 | 81.02  |
| PD026929  | 0 | 3 0 0  | 0 0 | 0 0 | 0 0 | 0 0 | 0 0 | 96.73  |
| PD027184  | 0 | 8 0 0  | 0 0 | 0 0 | 0 0 | 0 0 | 0 0 | 47.49  |
| PD027639  | 0 | 5 0 0  | 0 0 | 0 0 | 0 0 | 0 0 | 0 0 | 70.34  |
| PD027692  | 0 | 39 0 0 | 0 0 | 0 0 | 0 0 | 0 0 | 0 0 | 64.91  |
| PD028262  | 0 | 8 0 0  | 0 0 | 0 0 | 0 0 | 0 0 | 0 0 | 41.71  |
| PD029376  | 0 | 6 0 0  | 0 0 | 0 0 | 0 0 | 0 0 | 0 0 | 60.59  |
| PD029828  | 0 | 9 0 0  | 0 0 | 0 0 | 0 0 | 0 0 | 0 0 | 79.64  |
| PD030057  | 0 | 14 0 0 | 0 0 | 0 0 | 0 0 | 0 0 | 0 0 | 66.92  |
| PD030115  | 0 | 6 0 0  | 0 0 | 0 0 | 0 0 | 0 0 | 0 0 | 55.43  |
| PD030263  | 0 | 5 0 0  | 0 0 | 0 0 | 0 0 | 0 0 | 0 0 | 66.45  |
| PD030350  | 0 | 6 0 0  | 0 0 | 0 0 | 0 0 | 0 0 | 0 0 | 65.96  |
| PD030925  | 0 | 5 0 0  | 0 0 | 0 0 | 0 0 | 0 0 | 0 0 | 73.74  |
| PD031037  | 0 | 11 0 0 | 0 0 | 0 0 | 0 0 | 0 0 | 0 0 | 46.27  |
| PD031251  | 0 | 17 0 0 | 0 0 | 0 0 | 0 0 | 0 0 | 0 0 | 30.81  |
| PD033929  | 0 | 21 0 0 | 0 0 | 0 0 | 0 0 | 0 0 | 0 0 | 72.58  |
| PD034160  | 0 | 9 0 0  | 0 0 | 0 0 | 0 0 | 0 0 | 0 0 | 52.97  |
| PD035714  | 0 | 63 0 0 | 0 0 | 0 0 | 0 0 | 0 0 | 0 0 | 76.95  |
| PD037484  | 0 | 13 0 0 | 0 0 | 0 0 | 0 0 | 0 0 | 0 0 | 46.86  |
| PD037531  | 0 | 88 0 0 | 0 0 | 0 0 | 0 0 | 0 0 | 0 0 | 26.91  |
| PD037701  | 0 | 63 0 0 | 0 0 | 0 0 | 0 0 | 0 0 | 0 0 | 39.86  |
| PD038378  | 0 | 84 0 0 | 0 0 | 0 0 | 0 0 | 0 0 | 0 0 | 28.41  |
| PD040045  | 0 | 5 0 0  | 0 0 | 0 0 | 0 0 | 0 0 | 0 0 | 40.08  |
| PD040376  | 0 | 37 1 1 | 0 0 | 0 0 | 0 0 | 0 0 | 0 0 | 61.02  |
| PD040491  | 0 | 42 0 0 | 0 0 | 0 0 | 0 0 | 0 0 | 0 0 | 35.44  |
| PD042642  | 0 | 4 0 0  | 0 0 | 0 0 | 0 0 | 0 0 | 0 0 | 64.69  |
| PD042766  | 0 | 4 0 0  | 0 0 | 0 0 | 0 0 | 0 0 | 0 0 | 70.15  |
| PD047280  | 0 | 4 0 0  | 0 0 | 0 0 | 0 0 | 0 0 | 0 0 | 85.6   |
| PD049651  | 0 | 5 0 0  | 0 0 | 0 0 | 0 0 | 0 0 | 0 0 | 82.6   |
| PD052088  | 0 | 11 0 0 | 0 0 | 0 0 | 0 0 | 0 0 | 0 0 | 56.21  |
| PD052277  | 0 | 20 0 0 | 0 0 | 0 0 | 0 0 | 0 0 | 0 0 | 85.84  |
| PD052359  | 0 | 9 0 0  | 0 0 | 0 0 | 0 0 | 0 0 | 0 0 | 43.03  |
| PD053072  | 0 | 8 0 0  | 0 0 | 0 0 | 0 0 | 0 0 | 0 0 | 92.27  |
| PD053230  | 0 | 5 0 0  | 0 0 | 0 0 | 0 0 | 0 0 | 0 0 | 69.66  |
| PD053380  | 0 | 15 0 0 | 0 0 | 0 0 | 0 0 | 0 0 | 0 0 | 63.52  |
| PD053407  | 0 | 8 0 0  | 0 0 | 0 0 | 0 0 | 0 0 | 0 0 | 54.24  |
| PD053432  | 0 | 6 0 0  | 0 0 | 0 0 | 0 0 | 0 0 | 0 0 | 62.88  |
| PD054142  | 0 | 44 0 0 | 0 0 | 0 0 | 0 0 | 0 0 | 0 0 | 78.31  |
| PD065638  | 0 | 7 0 0  | 0 0 | 0 0 | 0 0 | 0 0 | 0 0 | 59.56  |
| PD066019  | 0 | 4 0 0  | 0 0 | 0 0 | 0 0 | 0 0 | 0 0 | 78.69  |
| PD067735  | 0 | 7 0 0  | 0 0 | 0 0 | 0 0 | 0 0 | 0 0 | 95.1   |
| PD070475  | 0 | 18 0 0 | 0 0 | 0 0 | 0 0 | 0 0 | 0 0 | 56.2   |
| PD070788  | 0 | 7 0 0  | 0 0 | 0 0 | 0 0 | 0 0 | 0 0 | 50.28  |
| PD070794  | 0 | 5 0 0  | 0 0 | 0 0 | 0 0 | 0 0 | 0 0 | 90.85  |
| PD070929  | 0 | 44 0 0 | 0 0 | 0 0 | 0 0 | 0 0 | 0 0 | 66.49  |
| PD070949  | 0 | 58 0 0 | 0 0 | 0 0 | 0 0 | 0 0 | 0 0 | 41.97  |
| PD071248  | 0 | 3 0 0  | 0 0 | 0 0 | 0 0 | 0 0 | 0 0 | 28.47  |
| PD072223  | 0 | 16 0 0 | 0 0 | 0 0 | 0 0 | 0 0 | 0 0 | 88.07  |
| PD072590  | 0 | 11 0 0 | 0 0 | 0 0 | 0 0 | 0 0 | 0 0 | 34.56  |
| PD072652  | 0 | 7 0 0  | 0 0 | 0 0 | 0 0 | 0 0 | 0 0 | 69.39  |
| PD073252  | 0 | 16 0 0 | 0 0 | 0 0 | 0 0 | 0 0 | 0 0 | 60.9   |
| PD074041  | 0 | 8 0 0  | 0 0 | 0 0 | 0 0 | 0 0 | 0 0 | 82.83  |
| PD080110  | 0 | 3 0 0  | 0 0 | 0 0 | 0 0 | 0 0 | 0 0 | 59.11  |
| PD103659  | 0 | 3 0 0  | 0 0 | 0 0 | 0 0 | 0 0 | 0 0 | 58.62  |
| PD104119  | 0 | 7 0 0  | 0 0 | 0 0 | 0 0 | 0 0 | 0 0 | 30.52  |
| PD104362  | 0 | 10 0 0 | 0 0 | 0 0 | 0 0 | 0 0 | 0 0 | 61.31  |
| PD107456  | 0 | 3 0 0  | 0 0 | 0 0 | 0 0 | 0 0 | 0 0 | 59.43  |
| PD107880  | 0 | 3 0 0  | 0 0 | 0 0 | 0 0 | 0 0 | 0 0 | 74.3   |
| PD108804  | 0 | 7 0 0  | 0 0 | 0 0 | 0 0 | 0 0 | 0 0 | 42.43  |
| PD109676  | 0 | 4 0 0  | 0 0 | 0 0 | 0 0 | 0 0 | 0 0 | 33.9   |
| PD111187  | 0 | 5 0 0  | 0 0 | 0 0 | 0 0 | 0 0 | 0 0 | 26.92  |
| PD113106  | 0 | 9 0 0  | 0 0 | 0 0 | 0 0 | 0 0 | 0 0 | 27.06  |
| PD116027  | 0 | 13 0 0 | 0 0 | 0 0 | 0 0 | 0 0 | 0 0 | 76.531 |
| PD117176  | 0 | 7 0 0  | 0 0 | 0 0 | 0 0 | 0 0 | 0 0 | 46.62  |
| PD117946  | 0 | 12 0 0 | 0 0 | 0 0 | 0 0 | 0 0 | 0 0 | 78.27  |
| PD119415  | 0 | 27 0 0 | 0 0 | 0 0 | 0 0 | 0 0 | 0 0 | 42.01  |
| PD125763  | 0 | 6 0 0  | 0 0 | 0 0 | 0 0 | 0 0 | 0 0 | 35.42  |
| PD127999  | 0 | 5 0 0  | 0 0 | 0 0 | 0 0 | 0 0 | 0 0 | 69.18  |
| PD128250  | 0 | 13 0 0 | 0 0 | 0 0 | 0 0 | 0 0 | 0 0 | 44.17  |
| PD128584  | 0 | 35 0 0 | 0 0 | 0 0 | 0 0 | 0 0 | 0 0 | 55.6   |
| PD133063  | 0 | 17 0 0 | 0 0 | 0 0 | 0 0 | 0 0 | 0 0 | 32.2   |
| PD135085  | 0 | 3 0 0  | 0 0 | 0 0 | 0 0 | 0 0 | 0 0 | 67.73  |
| PD136539  | 0 | 5 0 0  | 0 0 | 0 0 | 0 0 | 0 0 | 0 0 | 25.89  |
| PD137583  | 0 | 10 0 0 | 0 0 | 0 0 | 0 0 | 0 0 | 0 0 | 39.58  |
| PD140749  | 0 | 6 0 0  | 0 0 | 0 0 | 0 0 | 0 0 | 0 0 | 62.66  |
| PD140898  | 0 | 6 0 0  | 0 0 | 0 0 | 0 0 | 0 0 | 0 0 | 77.04  |
| PD141294  | 0 | 22 0 0 | 0 0 | 0 0 | 0 0 | 0 0 | 0 0 | 24.65  |
| PD170611  | 0 | 6 0 0  | 0 0 | 0 0 | 0 0 | 0 0 | 0 0 | 71.09  |
| PD170612  | 0 | 5 0 0  | 0 0 | 0 0 | 0 0 | 0 0 | 0 0 | 98.38  |
| PD172636  | 0 | 6 0 0  | 0 0 | 0 0 | 0 0 | 0 0 | 0 0 | 70.64  |
| PD175181  | 0 | 3 0 0  | 0 0 | 0 0 | 0 0 | 0 0 | 0 0 | 95.72  |
| PD177356  | 0 | 4 0 0  | 0 0 | 0 0 | 0 0 | 0 0 | 0 0 | 94.96  |
| PD177368  | 0 | 16 0 0 | 0 0 | 0 0 | 0 0 | 0 0 | 0 0 | 40.83  |
| PD177690  | 0 | 6 0 0  | 0 0 | 0 0 | 0 0 | 0 0 | 0 0 | 91.41  |
| PD178246  | 0 | 5 0 0  | 0 0 | 0 0 | 0 0 | 0 0 | 0 0 | 93.82  |
| PD178468  | 0 | 7 0 0  | 0 0 | 0 0 | 0 0 | 0 0 | 0 0 | 85.68  |
| PD181926  | 0 | 5 0 0  | 0 0 | 0 0 | 0 0 | 0 0 | 0 0 | 83.65  |
| PD182582  | 0 | 6 0 0  | 0 0 | 0 0 | 0 0 | 0 0 | 0 0 | 63.16  |
| PD191299  | 0 | 8 0 0  | 0 0 | 0 0 | 0 0 | 0 0 | 0 0 | 77.27  |
| PD191301  | 0 | 6 0 0  | 0 0 | 0 0 | 0 0 | 0 0 | 0 0 | 74.92  |
| PD191447  | 0 | 4 0 0  | 0 0 | 0 0 | 0 0 | 0 0 | 0 0 | 99.03  |
| PD191663  | 0 | 6 0 0  | 0 0 | 0 0 | 0 0 | 0 0 | 0 0 | 81.22  |
| PD195659  | 0 | 9 0 0  | 0 0 | 0 0 | 0 0 | 0 0 | 0 0 | 89.94  |
| PD195745  | 0 | 9 0 0  | 0 0 | 0 0 | 0 0 | 0 0 | 0 0 | 86.42  |
| PD198255  | 0 | 9 0 0  | 0 0 | 0 0 | 0 0 | 0 0 | 0 0 | 54.62  |
| PD199129  | 0 | 11 0 0 | 0 0 | 0 0 | 0 0 | 0 0 | 0 0 | 70.19  |
| PD201674  | 0 | 25 0 0 | 0 0 | 0 0 | 0 0 | 0 0 | 0 0 | 37.11  |
| PD205440  | 0 | 11 0 0 | 0 0 | 0 0 | 0 0 | 0 0 | 0 0 | 66.81  |
| PD207074  | 0 | 4 0 0  | 0 0 | 0 0 | 0 0 | 0 0 | 0 0 | 53.98  |
| PD208305  | 0 | 9 0 0  | 0 0 | 0 0 | 0 0 | 0 0 | 0 0 | 87.63  |
| PD297513  | 0 | 9 0 0  | 0 0 | 0 0 | 0 0 | 0 0 | 0 0 | 76.03  |
| PD320073  | 0 | 10 0 0 | 0 0 | 0 0 | 0 0 | 0 0 | 0 0 | 60.49  |
| PD320837  | 0 | 35 0 0 | 0 0 | 0 0 | 0 0 | 0 0 | 0 0 | 29.96  |
| PD321411  | 0 | 6 0 0  | 0 0 | 0 0 | 0 0 | 0 0 | 0 0 | 43     |
| PD338207  | 0 | 14 0 0 | 0 0 | 0 0 | 0 0 | 0 0 | 0 0 | 53.07  |
| PD339107  | 0 | 22 0 0 | 0 0 | 0 0 | 0 0 | 0 0 | 0 0 | 65.25  |
| PD349947  | 0 | 7 0 0  | 0 0 | 0 0 | 0 0 | 0 0 | 0 0 | 48.41  |
| PD352676  | 0 | 6 0 0  | 0 0 | 0 0 | 0 0 | 0 0 | 0 0 | 86.93  |
| PD360721  | 0 | 16 0 0 | 0 0 | 0 0 | 0 0 | 0 0 | 0 0 | 40.6   |
| PD394376  | 0 | 10 0 0 | 0 0 | 0 0 | 0 0 | 0 0 | 0 0 | 51.88  |
| PD396235  | 0 | 10 0 0 | 0 0 | 0 0 | 0 0 | 0 0 | 0 0 | 44.39  |
| PD396291  | 0 | 5 0 0  | 0 0 | 0 0 | 0 0 | 0 0 | 0 0 | 53.63  |
| PD396545  | 0 | 4 0 0  | 0 0 | 0 0 | 0 0 | 0 0 | 0 0 | 88.88  |
| PD404576  | 0 | 4 0 0  | 0 0 | 0 0 | 0 0 | 0 0 | 0 0 | 55.3   |
| PD415499  | 0 | 8 0 0  | 0 0 | 0 0 | 0 0 | 0 0 | 0 0 | 38.98  |
| PD439017  | 0 | 16 0 0 | 0 0 | 0 0 | 0 0 | 0 0 | 0 0 | 86.2   |
| PD458455  | 0 | 13 0 0 | 0 0 | 0 0 | 0 0 | 0 0 | 0 0 | 90.6   |
| PD460230  | 0 | 35 0 0 | 0 0 | 0 0 | 0 0 | 0 0 | 0 0 | 45.55  |
| PD471389  | 0 | 5 0 0  | 0 0 | 0 0 | 0 0 | 0 0 | 0 0 | 90.49  |
| PD472859  | 0 | 35 0 0 | 0 0 | 0 0 | 0 0 | 0 0 | 0 0 | 29.49  |
| PD492528  | 0 | 13 0 0 | 0 0 | 0 0 | 0 0 | 0 0 | 0 0 | 82.92  |
| PD542693  | 0 | 7 0 0  | 0 0 | 0 0 | 0 0 | 0 0 | 0 0 | 88.42  |
| PD566665  | 0 | 12 0 0 | 0 0 | 0 0 | 0 0 | 0 0 | 0 0 | 30.8   |
| PD575093  | 0 | 6 0 0  | 0 0 | 0 0 | 0 0 | 0 0 | 0 0 | 60     |
| PD580032  | 0 | 7 0 0  | 0 0 | 0 0 | 0 0 | 0 0 | 0 0 | 98.31  |
| PD608212  | 0 | 7 0 0  | 0 0 | 0 0 | 0 0 | 0 0 | 0 0 | 78.69  |
| PD619568  | 0 | 22 0 0 | 0 0 | 0 0 | 0 0 | 0 0 | 0 0 | 57.344 |
| PD699877  | 0 | 20 0 0 | 0 0 | 0 0 | 0 0 | 0 0 | 0 0 | 64.68  |
| PD705231  | 0 | 25 0 0 | 0 0 | 0 0 | 0 0 | 0 0 | 0 0 | 51.86  |
| PD710533  | 0 | 18 0 0 | 0 0 | 0 0 | 0 0 | 0 0 | 0 0 | 68.96  |
| PD736990  | 0 | 8 0 0  | 0 0 | 0 0 | 0 0 | 0 0 | 0 0 | 48     |
| PD750912  | 0 | 23 0 0 | 0 0 | 0 0 | 0 0 | 0 0 | 0 0 | 65.37  |
| PD822638  | 0 | 10 0 0 | 0 0 | 0 0 | 0 0 | 0 0 | 0 0 | 40.33  |
| PD857460  | 0 | 3 0 0  | 0 0 | 0 0 | 0 0 | 0 0 | 0 0 | 99.19  |
| PD868899  | 0 | 10 0 0 | 0 0 | 0 0 | 0 0 | 0 0 | 0 0 | 62.43  |
| PD870268  | 0 | 5 0 0  | 0 0 | 0 0 | 0 0 | 0 0 | 0 0 | 49.86  |
| PD910989  | 0 | 4 0 0  | 0 0 | 0 0 | 0 0 | 0 0 | 0 0 | 60.52  |

|         |   |         |     |     |     |     |     |       |
|---------|---|---------|-----|-----|-----|-----|-----|-------|
| PF01203 | 0 | 104 0 0 | 0 0 | 0 0 | 0 0 | 0 0 | 0 0 | 14.46 |
| PF01905 | 0 | 36 0 0  | 0 0 | 0 0 | 0 0 | 0 0 | 0 0 | 19.67 |
| PF01908 | 0 | 162 0 0 | 0 0 | 0 0 | 0 0 | 0 0 | 0 0 | 17.44 |
| PF02090 | 0 | 14 0 0  | 0 0 | 0 0 | 0 0 | 0 0 | 0 0 | 69.42 |
| PF02114 | 0 | 164 0 0 | 0 0 | 0 0 | 0 0 | 0 0 | 0 0 | 21.41 |
| PF02157 | 0 | 37 0 0  | 0 0 | 0 0 | 0 0 | 0 0 | 0 0 | 32.46 |
| PF02211 | 0 | 113 0 0 | 0 0 | 0 0 | 0 0 | 0 0 | 0 0 | 20.4  |
| PF02409 | 0 | 27 0 0  | 0 0 | 0 0 | 0 0 | 0 0 | 0 0 | 34.77 |
| PF02542 | 0 | 103 0 0 | 0 0 | 0 0 | 0 0 | 0 0 | 0 0 | 32.77 |
| PF02697 | 0 | 28 0 0  | 0 0 | 0 0 | 0 0 | 0 0 | 0 0 | 28.19 |
| PF02967 | 0 | 83 0 0  | 0 0 | 0 0 | 0 0 | 0 0 | 0 0 | 35.89 |
| PF03059 | 0 | 55 0 0  | 0 0 | 0 0 | 0 0 | 0 0 | 0 0 | 27.98 |
| PF03219 | 0 | 124 0 0 | 0 0 | 0 0 | 0 0 | 0 0 | 0 0 | 31.27 |
| PF03283 | 0 | 136 0 0 | 0 0 | 0 0 | 0 0 | 0 0 | 0 0 | 32.09 |
| PF03346 | 0 | 4 0 0   | 0 0 | 0 0 | 0 0 | 0 0 | 0 0 | 55.75 |
| PF04126 | 0 | 40 0 0  | 0 0 | 0 0 | 0 0 | 0 0 | 0 0 | 19.43 |
| PF04462 | 0 | 24 0 0  | 0 0 | 0 0 | 0 0 | 0 0 | 0 0 | 18.05 |
| PF04465 | 0 | 63 0 0  | 0 0 | 0 0 | 0 0 | 0 0 | 0 0 | 18.31 |
| PF04477 | 0 | 27 0 0  | 0 0 | 0 0 | 0 0 | 0 0 | 0 0 | 34.2  |
| PF04585 | 0 | 101 0 0 | 0 0 | 0 0 | 0 0 | 0 0 | 0 0 | 46.49 |
| PF04605 | 0 | 12 0 0  | 0 0 | 0 0 | 0 0 | 0 0 | 0 0 | 34.4  |
| PF04888 | 0 | 55 0 0  | 0 0 | 0 0 | 0 0 | 0 0 | 0 0 | 13.54 |
| PF04944 | 0 | 57 0 0  | 0 0 | 0 0 | 0 0 | 0 0 | 0 0 | 32.09 |
| PF04953 | 0 | 94 0 0  | 0 0 | 0 0 | 0 0 | 0 0 | 0 0 | 53.64 |
| PF05017 | 0 | 67 0 0  | 0 0 | 0 0 | 0 0 | 0 0 | 0 0 | 44.67 |
| PF05069 | 0 | 130 0 0 | 0 0 | 0 0 | 0 0 | 0 0 | 0 0 | 16.78 |
| PF05120 | 0 | 30 0 0  | 0 0 | 0 0 | 0 0 | 0 0 | 0 0 | 28.04 |
| PF05169 | 0 | 103 0 0 | 0 0 | 0 0 | 0 0 | 0 0 | 0 0 | 58.05 |
| PF05213 | 0 | 3 0 0   | 0 0 | 0 0 | 0 0 | 0 0 | 0 0 | 89.62 |
| PF05218 | 0 | 12 0 0  | 0 0 | 0 0 | 0 0 | 0 0 | 0 0 | 19.27 |
| PF05245 | 0 | 11 0 0  | 0 0 | 0 0 | 0 0 | 0 0 | 0 0 | 56.25 |
| PF05309 | 0 | 85 0 0  | 0 0 | 0 0 | 0 0 | 0 0 | 0 0 | 16.84 |
| PF05426 | 0 | 58 0 0  | 0 0 | 0 0 | 0 0 | 0 0 | 0 0 | 17.9  |
| PF05457 | 0 | 35 0 0  | 0 0 | 0 0 | 0 0 | 0 0 | 0 0 | 52.95 |
| PF05462 | 0 | 28 0 0  | 0 0 | 0 0 | 0 0 | 0 0 | 0 0 | 30.43 |
| PF05468 | 0 | 188 0 0 | 0 0 | 0 0 | 0 0 | 0 0 | 0 0 | 10.74 |
| PF05516 | 0 | 56 0 0  | 0 0 | 0 0 | 0 0 | 0 0 | 0 0 | 49.76 |
| PF05575 | 0 | 20 0 0  | 0 0 | 0 0 | 0 0 | 0 0 | 0 0 | 24.66 |
| PF05783 | 0 | 92 0 0  | 0 0 | 0 0 | 0 0 | 0 0 | 0 0 | 26.6  |
| PF05786 | 0 | 113 0 0 | 0 0 | 0 0 | 0 0 | 0 0 | 0 0 | 20.18 |
| PF05802 | 0 | 10 0 0  | 0 0 | 0 0 | 0 0 | 0 0 | 0 0 | 31.83 |
| PF05809 | 0 | 48 0 0  | 0 0 | 0 0 | 0 0 | 0 0 | 0 0 | 59.65 |
| PF05821 | 0 | 60 0 0  | 0 0 | 0 0 | 0 0 | 0 0 | 0 0 | 27.85 |
| PF05855 | 0 | 17 0 0  | 0 0 | 0 0 | 0 0 | 0 0 | 0 0 | 34.15 |
| PF05857 | 0 | 111 0 0 | 0 0 | 0 0 | 0 0 | 0 0 | 0 0 | 17.35 |
| PF05863 | 0 | 80 0 0  | 0 0 | 0 0 | 0 0 | 0 0 | 0 0 | 46.74 |
| PF05976 | 0 | 259 0 0 | 0 0 | 0 0 | 0 0 | 0 0 | 0 0 | 15.7  |
| PF06069 | 0 | 40 0 0  | 0 0 | 0 0 | 0 0 | 0 0 | 0 0 | 31.76 |
| PF06093 | 0 | 122 0 0 | 0 0 | 0 0 | 0 0 | 0 0 | 0 0 | 36.86 |
| PF06127 | 0 | 297 0 0 | 0 0 | 0 0 | 0 0 | 0 0 | 0 0 | 28.67 |
| PF06137 | 0 | 25 0 0  | 0 0 | 0 0 | 0 0 | 0 0 | 0 0 | 35.31 |
| PF06263 | 0 | 87 1 1  | 0 0 | 0 0 | 0 0 | 0 0 | 0 0 | 46.96 |
| PF06264 | 0 | 142 0 0 | 0 0 | 0 0 | 0 0 | 0 0 | 0 0 | 14.41 |
| PF06274 | 0 | 11 0 0  | 0 0 | 0 0 | 0 0 | 0 0 | 0 0 | 25.58 |
| PF06312 | 0 | 48 0 0  | 0 0 | 0 0 | 0 0 | 0 0 | 0 0 | 32.63 |
| PF06330 | 0 | 29 0 0  | 0 0 | 0 0 | 0 0 | 0 0 | 0 0 | 21.73 |
| PF06352 | 0 | 43 0 0  | 0 0 | 0 0 | 0 0 | 0 0 | 0 0 | 46.92 |
| PF06354 | 0 | 138 0 0 | 0 0 | 0 0 | 0 0 | 0 0 | 0 0 | 41.24 |
| PF06359 | 0 | 32 0 0  | 0 0 | 0 0 | 0 0 | 0 0 | 0 0 | 91.88 |
| PF06381 | 0 | 61 0 0  | 0 0 | 0 0 | 0 0 | 0 0 | 0 0 | 18.75 |
| PF06408 | 0 | 64 0 0  | 0 0 | 0 0 | 0 0 | 0 0 | 0 0 | 59.11 |
| PF06447 | 0 | 68 0 0  | 0 0 | 0 0 | 0 0 | 0 0 | 0 0 | 20.27 |
| PF06520 | 0 | 75 0 0  | 0 0 | 0 0 | 0 0 | 0 0 | 0 0 | 47.66 |
| PF06539 | 0 | 114 0 0 | 0 0 | 0 0 | 0 0 | 0 0 | 0 0 | 38.98 |
| PF06555 | 0 | 101 0 0 | 0 0 | 0 0 | 0 0 | 0 0 | 0 0 | 38.01 |
| PF06570 | 0 | 112 0 0 | 0 0 | 0 0 | 0 0 | 0 0 | 0 0 | 14.47 |
| PF06604 | 0 | 22 0 0  | 0 0 | 0 0 | 0 0 | 0 0 | 0 0 | 45.96 |
| PF06609 | 0 | 32 0 0  | 0 0 | 0 0 | 0 0 | 0 0 | 0 0 | 20.93 |
| PF06686 | 0 | 70 0 0  | 0 0 | 0 0 | 0 0 | 0 0 | 0 0 | 48.5  |
| PF06704 | 0 | 7 0 0   | 0 0 | 0 0 | 0 0 | 0 0 | 0 0 | 25.15 |
| PF06705 | 0 | 9 0 0   | 0 0 | 0 0 | 0 0 | 0 0 | 0 0 | 14.74 |
| PF06845 | 0 | 11 0 0  | 0 0 | 0 0 | 0 0 | 0 0 | 0 0 | 41.8  |
| PF06893 | 0 | 47 0 0  | 0 0 | 0 0 | 0 0 | 0 0 | 0 0 | 31.32 |
| PF06896 | 0 | 7 0 0   | 0 0 | 0 0 | 0 0 | 0 0 | 0 0 | 21.93 |
| PF06914 | 0 | 74 0 0  | 0 0 | 0 0 | 0 0 | 0 0 | 0 0 | 68.64 |
| PF06948 | 0 | 17 0 0  | 0 0 | 0 0 | 0 0 | 0 0 | 0 0 | 34.46 |
| PF07018 | 0 | 18 0 0  | 0 0 | 0 0 | 0 0 | 0 0 | 0 0 | 53.92 |
| PF07050 | 0 | 94 0 0  | 0 0 | 0 0 | 0 0 | 0 0 | 0 0 | 30.33 |
| PF07091 | 0 | 24 0 0  | 0 0 | 0 0 | 0 0 | 0 0 | 0 0 | 42.77 |
| PF07128 | 0 | 26 0 0  | 0 0 | 0 0 | 0 0 | 0 0 | 0 0 | 47.96 |
| PF07159 | 0 | 53 0 0  | 0 0 | 0 0 | 0 0 | 0 0 | 0 0 | 53.97 |
| PF07169 | 0 | 14 0 0  | 0 0 | 0 0 | 0 0 | 0 0 | 0 0 | 83.62 |
| PF07186 | 0 | 18 0 0  | 0 0 | 0 0 | 0 0 | 0 0 | 0 0 | 44.26 |
| PF07199 | 0 | 23 0 0  | 0 0 | 0 0 | 0 0 | 0 0 | 0 0 | 25.92 |
| PF07211 | 0 | 10 0 0  | 0 0 | 0 0 | 0 0 | 0 0 | 0 0 | 33.64 |
| PF07225 | 0 | 38 0 0  | 0 0 | 0 0 | 0 0 | 0 0 | 0 0 | 30.24 |
| PF07241 | 0 | 62 0 0  | 0 0 | 0 0 | 0 0 | 0 0 | 0 0 | 41.07 |
| PF07269 | 0 | 11 0 0  | 0 0 | 0 0 | 0 0 | 0 0 | 0 0 | 40.96 |
| PF07298 | 0 | 201 0 0 | 0 0 | 0 0 | 0 0 | 0 0 | 0 0 | 16.83 |
| PF07307 | 0 | 51 0 0  | 0 0 | 0 0 | 0 0 | 0 0 | 0 0 | 28.14 |
| PF07331 | 0 | 205 0 0 | 0 0 | 0 0 | 0 0 | 0 0 | 0 0 | 15.51 |
| PF07352 | 0 | 24 0 0  | 0 0 | 0 0 | 0 0 | 0 0 | 0 0 | 21.22 |
| PF07360 | 0 | 5 0 0   | 0 0 | 0 0 | 0 0 | 0 0 | 0 0 | 45.82 |
| PF07412 | 0 | 31 0 0  | 0 0 | 0 0 | 0 0 | 0 0 | 0 0 | 35.75 |
| PF07638 | 0 | 66 0 0  | 0 0 | 0 0 | 0 0 | 0 0 | 0 0 | 22.26 |
| PF07665 | 0 | 12 0 0  | 0 0 | 0 0 | 0 0 | 0 0 | 0 0 | 50.06 |
| PF07783 | 0 | 24 0 0  | 0 0 | 0 0 | 0 0 | 0 0 | 0 0 | 29.39 |
| PF08128 | 0 | 13 0 0  | 0 0 | 0 0 | 0 0 | 0 0 | 0 0 | 58.59 |
| PF08192 | 0 | 15 0 0  | 0 0 | 0 0 | 0 0 | 0 0 | 0 0 | 24.15 |
| PF08203 | 0 | 9 0 0   | 0 0 | 0 0 | 0 0 | 0 0 | 0 0 | 21.53 |
| PF08524 | 0 | 49 0 0  | 0 0 | 0 0 | 0 0 | 0 0 | 0 0 | 17.83 |
| PF08568 | 0 | 59 0 0  | 0 0 | 0 0 | 0 0 | 0 0 | 0 0 | 11.31 |
| PF08616 | 0 | 51 0 0  | 0 0 | 0 0 | 0 0 | 0 0 | 0 0 | 21.94 |
| PF08695 | 0 | 38 0 0  | 0 0 | 0 0 | 0 0 | 0 0 | 0 0 | 26.94 |
| PF08745 | 0 | 24 0 0  | 0 0 | 0 0 | 0 0 | 0 0 | 0 0 | 36.8  |
| PF08927 | 0 | 69 0 0  | 0 0 | 0 0 | 0 0 | 0 0 | 0 0 | 45.68 |
| PF08981 | 0 | 36 0 0  | 0 0 | 0 0 | 0 0 | 0 0 | 0 0 | 42    |
| PF09035 | 0 | 17 0 0  | 0 0 | 0 0 | 0 0 | 0 0 | 0 0 | 52.23 |
| PF09135 | 0 | 24 0 0  | 0 0 | 0 0 | 0 0 | 0 0 | 0 0 | 33.14 |
| PF09184 | 0 | 60 0 0  | 0 0 | 0 0 | 0 0 | 0 0 | 0 0 | 23.22 |
| PF09274 | 0 | 11 0 0  | 0 0 | 0 0 | 0 0 | 0 0 | 0 0 | 27.15 |
| PF09417 | 0 | 13 0 0  | 0 0 | 0 0 | 0 0 | 0 0 | 0 0 | 33.76 |
| PF09490 | 0 | 108 0 0 | 0 0 | 0 0 | 0 0 | 0 0 | 0 0 | 24.71 |
| PF09513 | 0 | 5 0 0   | 0 0 | 0 0 | 0 0 | 0 0 | 0 0 | 26.05 |
| PF09541 | 0 | 15 0 0  | 0 0 | 0 0 | 0 0 | 0 0 | 0 0 | 54.84 |
| PF09555 | 0 | 64 0 0  | 0 0 | 0 0 | 0 0 | 0 0 | 0 0 | 54.84 |
| PF09568 | 0 | 8 0 0   | 0 0 | 0 0 | 0 0 | 0 0 | 0 0 | 30.88 |
| PF09619 | 0 | 14 0 0  | 0 0 | 0 0 | 0 0 | 0 0 | 0 0 | 32.02 |
| PF09621 | 0 | 22 0 0  | 0 0 | 0 0 | 0 0 | 0 0 | 0 0 | 33.75 |
| PF09622 | 0 | 34 0 0  | 0 0 | 0 0 | 0 0 | 0 0 | 0 0 | 27.38 |
| PF09647 | 0 | 6 0 0   | 0 0 | 0 0 | 0 0 | 0 0 | 0 0 | 88.95 |
| PF09650 | 0 | 65 0 0  | 0 0 | 0 0 | 0 0 | 0 0 | 0 0 | 25.63 |
| PF09653 | 0 | 33 0 0  | 0 0 | 0 0 | 0 0 | 0 0 | 0 0 | 51.65 |
| PF09659 | 0 | 21 0 0  | 0 0 | 0 0 | 0 0 | 0 0 | 0 0 | 25.99 |
| PF09677 | 0 | 33 0 0  | 0 0 | 0 0 | 0 0 | 0 0 | 0 0 | 26.05 |
| PF09691 | 0 | 71 0 0  | 0 0 | 0 0 | 0 0 | 0 0 | 0 0 | 58.06 |
| PF09712 | 0 | 29 0 0  | 0 0 | 0 0 | 0 0 | 0 0 | 0 0 | 16.16 |
| PF09761 | 0 | 16 0 0  | 0 0 | 0 0 | 0 0 | 0 0 | 0 0 | 23.38 |
| PF09792 | 0 | 37 0 0  | 0 0 | 0 0 | 0 0 | 0 0 | 0 0 | 26.23 |
| PF09800 | 0 | 36 0 0  | 0 0 | 0 0 | 0 0 | 0 0 | 0 0 | 51.4  |
| PF09847 | 0 | 22 0 0  | 0 0 | 0 0 | 0 0 | 0 0 | 0 0 | 16.76 |
| PF09889 | 0 | 12 0 0  | 0 0 | 0 0 | 0 0 | 0 0 | 0 0 | 38.71 |
| PF09993 | 0 | 29 0 0  | 0 0 | 0 0 | 0 0 | 0 0 | 0 0 | 35.76 |
| PF10020 | 0 | 19 0 0  | 0 0 | 0 0 | 0 0 | 0 0 | 0 0 | 25.1  |
| PF10074 | 0 | 110 0 0 | 0 0 | 0 0 | 0 0 | 0 0 | 0 0 | 21.25 |
| PF10082 | 0 | 134 0 0 | 0 0 | 0 0 | 0 0 | 0 0 | 0 0 | 6.25  |
| PF10087 | 0 | 127 0 0 | 0 0 | 0 0 | 0 0 | 0 0 | 0 0 | 6.52  |
| PF10121 | 0 | 17 0 0  | 0 0 | 0 0 | 0 0 | 0 0 | 0 0 | 52.72 |
| PF10227 | 0 | 29 0 0  | 0 0 | 0 0 | 0 0 | 0 0 | 0 0 | 43.37 |
| PF10232 | 0 | 57 0 0  | 0 0 | 0 0 | 0 0 | 0 0 | 0 0 | 23.54 |
| PF10484 | 0 | 35 0 0  | 0 0 | 0 0 | 0 0 | 0 0 | 0 0 | 44.04 |
| PF10488 | 0 | 30 0 0  | 0 0 | 0 0 | 0 0 | 0 0 | 1 1 | 32.76 |
| PF10575 | 0 | 35 0 0  | 0 0 | 0 0 | 0 0 | 0 0 | 0 0 | 54.59 |
| PF10619 | 0 | 24 0 0  | 0 0 | 0 0 | 0 0 | 0 0 | 0 0 | 21.36 |
| PF10687 | 0 | 99 0 0  | 0 0 | 0 0 | 0 0 | 0 0 | 0 0 | 18.64 |
| PF10701 | 0 | 65 0 0  | 0 0 | 0 0 | 0 0 | 0 0 | 0 0 | 21.46 |
| PF10723 | 0 | 37 0 0  | 0 0 | 0 0 | 0 0 | 0 0 | 0 0 | 33.81 |

|                |   |         |     |     |     |     |     |       |
|----------------|---|---------|-----|-----|-----|-----|-----|-------|
| PF10734        | 0 | 42.0 0  | 0 0 | 0 0 | 0 0 | 0 0 | 0 0 | 10.84 |
| PF10748        | 0 | 54.0 0  | 0 0 | 0 0 | 0 0 | 0 0 | 0 0 | 48.68 |
| PF10756        | 0 | 128.0 0 | 0 0 | 0 0 | 0 0 | 0 0 | 0 0 | 17.04 |
| PF10760        | 0 | 27.0 0  | 0 0 | 0 0 | 0 0 | 0 0 | 0 0 | 28.63 |
| PF10773        | 0 | 50.0 0  | 0 0 | 0 0 | 0 0 | 0 0 | 0 0 | 68.04 |
| PF10798        | 0 | 52.0 0  | 0 0 | 0 0 | 0 0 | 0 0 | 0 0 | 45.3  |
| PF10801        | 0 | 22.0 0  | 0 0 | 0 0 | 0 0 | 0 0 | 0 0 | 58.74 |
| PF10802        | 0 | 13.0 0  | 0 0 | 0 0 | 0 0 | 0 0 | 0 0 | 36.81 |
| PF10804        | 0 | 20.0 0  | 0 0 | 0 0 | 0 0 | 0 0 | 0 0 | 84.7  |
| PF10805        | 0 | 24.0 0  | 0 0 | 0 0 | 0 0 | 0 0 | 0 0 | 15.19 |
| PF10809        | 0 | 24.0 0  | 0 0 | 0 0 | 0 0 | 0 0 | 0 0 | 32.59 |
| PF10810        | 0 | 35.0 0  | 0 0 | 0 0 | 0 0 | 0 0 | 0 0 | 84.92 |
| PF10811        | 0 | 9.0 0   | 0 0 | 0 0 | 0 0 | 0 0 | 0 0 | 83.29 |
| PF10812        | 0 | 15.0 0  | 0 0 | 0 0 | 0 0 | 0 0 | 0 0 | 49.61 |
| PF10814        | 0 | 14.0 0  | 0 0 | 0 0 | 0 0 | 0 0 | 0 0 | 65.44 |
| PF10815        | 0 | 18.0 0  | 0 0 | 0 0 | 0 0 | 0 0 | 0 0 | 82.07 |
| PF10817        | 0 | 6.0 0   | 0 0 | 0 0 | 0 0 | 0 0 | 0 0 | 64.77 |
| PF10824        | 0 | 127.0 0 | 0 0 | 0 0 | 0 0 | 0 0 | 0 0 | 6.61  |
| PF10828        | 0 | 23.0 0  | 0 0 | 0 0 | 0 0 | 0 0 | 0 0 | 16.06 |
| PF10831        | 0 | 35.0 0  | 0 0 | 0 0 | 0 0 | 0 0 | 0 0 | 92.19 |
| PF10832        | 0 | 35.0 0  | 0 0 | 0 0 | 0 0 | 0 0 | 0 0 | 86.99 |
| PF10833        | 0 | 12.0 0  | 0 0 | 0 0 | 0 0 | 0 0 | 0 0 | 29.18 |
| PF10834        | 0 | 9.0 0   | 0 0 | 0 0 | 0 0 | 0 0 | 0 0 | 98.6  |
| PF10840        | 0 | 17.0 0  | 0 0 | 0 0 | 0 0 | 0 0 | 0 0 | 72.22 |
| PF10843        | 0 | 8.0 0   | 0 0 | 0 0 | 0 0 | 0 0 | 0 0 | 55.92 |
| PF10844        | 0 | 22.0 0  | 0 0 | 0 0 | 0 0 | 0 0 | 0 0 | 30.47 |
| PF10855        | 0 | 12.0 0  | 0 0 | 0 0 | 0 0 | 0 0 | 0 0 | 83.41 |
| PF10856        | 0 | 11.0 0  | 0 0 | 0 0 | 0 0 | 0 0 | 0 0 | 70.26 |
| PF10869        | 0 | 9.0 0   | 0 0 | 0 0 | 0 0 | 0 0 | 0 0 | 47.25 |
| PF10872        | 0 | 3.0 0   | 0 0 | 0 0 | 0 0 | 0 0 | 0 0 | 95.8  |
| PF10873        | 0 | 8.0 0   | 0 0 | 0 0 | 0 0 | 0 0 | 0 0 | 69.42 |
| PF10875        | 0 | 11.0 0  | 0 0 | 0 0 | 0 0 | 0 0 | 0 0 | 62.47 |
| PF10877        | 0 | 9.0 0   | 0 0 | 0 0 | 0 0 | 0 0 | 0 0 | 93.73 |
| PF10879        | 0 | 8.0 0   | 0 0 | 0 0 | 0 0 | 0 0 | 0 0 | 92.78 |
| PF10882        | 0 | 27.0 0  | 0 0 | 0 0 | 0 0 | 0 0 | 0 0 | 18.22 |
| PF10904        | 0 | 8.0 0   | 0 0 | 0 0 | 0 0 | 0 0 | 0 0 | 73.07 |
| PF10907        | 0 | 13.0 0  | 0 0 | 0 0 | 0 0 | 0 0 | 0 0 | 40.55 |
| PF10913        | 0 | 7.0 0   | 0 0 | 0 0 | 0 0 | 0 0 | 0 0 | 89.7  |
| PF10915        | 0 | 7.0 0   | 0 0 | 0 0 | 0 0 | 0 0 | 0 0 | 83.77 |
| PF10920        | 0 | 4.0 0   | 0 0 | 0 0 | 0 0 | 0 0 | 0 0 | 39.04 |
| PF10921        | 0 | 8.0 0   | 0 0 | 0 0 | 0 0 | 0 0 | 0 0 | 71.34 |
| PF10924        | 0 | 8.0 0   | 0 0 | 0 0 | 0 0 | 0 0 | 0 0 | 67.11 |
| PF10925        | 0 | 43.0 0  | 0 0 | 0 0 | 0 0 | 0 0 | 0 0 | 21.84 |
| PF10936        | 0 | 26.0 0  | 0 0 | 0 0 | 0 0 | 0 0 | 0 0 | 28.77 |
| PF10937        | 0 | 45.0 0  | 0 0 | 0 0 | 0 0 | 0 0 | 0 0 | 30.17 |
| PF10949        | 0 | 22.0 0  | 0 0 | 0 0 | 0 0 | 0 0 | 0 0 | 53.34 |
| PF10960        | 0 | 35.0 0  | 0 0 | 0 0 | 0 0 | 0 0 | 0 0 | 38.82 |
| PF10962        | 0 | 20.0 0  | 0 0 | 0 0 | 0 0 | 0 0 | 0 0 | 19.65 |
| PF10963        | 0 | 28.0 0  | 0 0 | 0 0 | 0 0 | 0 0 | 0 0 | 36.77 |
| PF10965        | 0 | 43.0 0  | 0 0 | 0 0 | 0 0 | 0 0 | 0 0 | 81.68 |
| PF10968        | 0 | 39.0 0  | 0 0 | 0 0 | 0 0 | 0 0 | 0 0 | 70.68 |
| PF10969        | 0 | 28.0 0  | 0 0 | 0 0 | 0 0 | 0 0 | 0 0 | 32.7  |
| PF10970        | 0 | 24.0 0  | 0 0 | 0 0 | 0 0 | 0 0 | 0 0 | 49.17 |
| PF10991        | 0 | 41.0 0  | 0 0 | 0 0 | 0 0 | 0 0 | 0 0 | 39.05 |
| PF11019        | 0 | 47.0 0  | 0 0 | 0 0 | 0 0 | 0 0 | 0 0 | 18.43 |
| PF11021        | 0 | 26.0 0  | 0 0 | 0 0 | 0 0 | 0 0 | 0 0 | 49.9  |
| PF11023        | 0 | 30.0 0  | 0 0 | 0 0 | 0 0 | 0 0 | 0 0 | 64.22 |
| PF11032        | 0 | 16.0 0  | 0 0 | 0 0 | 0 0 | 0 0 | 0 0 | 41.04 |
| PF11039        | 0 | 13.0 0  | 0 0 | 0 0 | 0 0 | 0 0 | 0 0 | 72.09 |
| PF11055        | 0 | 6.0 0   | 0 0 | 0 0 | 0 0 | 0 0 | 0 0 | 42.73 |
| PF11058        | 0 | 8.0 0   | 0 0 | 0 0 | 0 0 | 0 0 | 0 0 | 87.43 |
| PF11079        | 0 | 30.0 0  | 0 0 | 0 0 | 0 0 | 0 0 | 0 0 | 56.18 |
| PF11080        | 0 | 63.0 0  | 0 0 | 0 0 | 0 0 | 0 0 | 0 0 | 49.75 |
| PF11085        | 0 | 25.0 0  | 0 0 | 0 0 | 0 0 | 0 0 | 0 0 | 53.88 |
| PF11092        | 0 | 9.0 0   | 0 0 | 0 0 | 0 0 | 0 0 | 0 0 | 69.58 |
| PF11093        | 0 | 19.0 0  | 0 0 | 0 0 | 0 0 | 0 0 | 0 0 | 36.38 |
| PF11105        | 0 | 20.0 0  | 0 0 | 0 0 | 0 0 | 0 0 | 0 0 | 58.56 |
| PF11106        | 0 | 28.0 0  | 0 0 | 0 0 | 0 0 | 0 0 | 0 0 | 95.74 |
| PF11109        | 0 | 6.0 0   | 0 0 | 0 0 | 0 0 | 0 0 | 0 0 | 69.86 |
| PF11115        | 0 | 43.0 0  | 0 0 | 0 0 | 0 0 | 0 0 | 0 0 | 83.3  |
| PF11121        | 0 | 28.0 0  | 0 0 | 0 0 | 0 0 | 0 0 | 0 0 | 73.8  |
| PF11124        | 0 | 6.0 0   | 0 0 | 0 0 | 0 0 | 0 0 | 0 0 | 31.92 |
| PF11132        | 0 | 7.0 0   | 0 0 | 0 0 | 0 0 | 0 0 | 0 0 | 45.41 |
| PF11133        | 0 | 11.0 0  | 0 0 | 0 0 | 0 0 | 0 0 | 0 0 | 35.09 |
| PF11157        | 0 | 50.0 0  | 0 0 | 0 0 | 0 0 | 0 0 | 0 0 | 22.29 |
| PF11266        | 0 | 35.0 0  | 0 0 | 0 0 | 0 0 | 0 0 | 0 0 | 69.8  |
| PF11361        | 0 | 79.0 0  | 0 0 | 0 0 | 0 0 | 0 0 | 0 0 | 29.98 |
| PF11419        | 0 | 7.0 0   | 0 0 | 0 0 | 0 0 | 0 0 | 0 0 | 30.04 |
| PF11428        | 0 | 4.0 0   | 0 0 | 0 0 | 0 0 | 0 0 | 0 0 | 24.3  |
| PF11443        | 0 | 60.0 0  | 0 0 | 0 0 | 0 0 | 0 0 | 0 0 | 34.19 |
| PF11520        | 0 | 20.0 0  | 0 0 | 0 0 | 0 0 | 0 0 | 0 0 | 45.37 |
| PF11576        | 0 | 8.0 0   | 0 0 | 0 0 | 0 0 | 0 0 | 0 0 | 55.52 |
| PF11583        | 0 | 171.0 0 | 0 0 | 0 0 | 0 0 | 0 0 | 0 0 | 7.96  |
| PF11599        | 0 | 3.0 0   | 0 0 | 0 0 | 0 0 | 0 0 | 0 0 | 34.88 |
| PF11655        | 0 | 42.0 0  | 0 0 | 0 0 | 0 0 | 0 0 | 0 0 | 18.61 |
| PF11657        | 0 | 11.0 0  | 0 0 | 0 0 | 0 0 | 0 0 | 0 0 | 39.05 |
| PF11777        | 0 | 15.0 0  | 0 0 | 0 0 | 0 0 | 0 0 | 0 0 | 21.52 |
| PF11813        | 0 | 39.0 0  | 0 0 | 0 0 | 0 0 | 0 0 | 0 0 | 64.43 |
| PF11877        | 0 | 49.0 0  | 0 0 | 0 0 | 0 0 | 0 0 | 0 0 | 24.59 |
| PF12048        | 0 | 52.0 0  | 0 0 | 0 0 | 0 0 | 0 0 | 0 0 | 16.52 |
| PF12070        | 0 | 59.0 0  | 0 0 | 0 0 | 0 0 | 0 0 | 0 0 | 42.52 |
| PF12084        | 0 | 53.0 0  | 0 0 | 0 0 | 0 0 | 0 0 | 0 0 | 69.07 |
| PF12116        | 0 | 76.0 0  | 0 0 | 0 0 | 0 0 | 0 0 | 0 0 | 65.07 |
| PF12127        | 0 | 68.0 0  | 0 0 | 0 0 | 0 0 | 0 0 | 0 0 | 70.34 |
| PF12189        | 0 | 3.0 0   | 0 0 | 0 0 | 0 0 | 0 0 | 0 0 | 71.26 |
| PF12191        | 0 | 5.0 0   | 0 0 | 0 0 | 0 0 | 0 0 | 0 0 | 37.94 |
| PF12206        | 0 | 3.0 0   | 0 0 | 0 0 | 0 0 | 0 0 | 0 0 | 39.87 |
| PF12318        | 0 | 44.0 0  | 0 0 | 0 0 | 0 0 | 0 0 | 0 0 | 31.96 |
| PF12328        | 0 | 33.0 0  | 0 0 | 0 0 | 0 0 | 0 0 | 0 0 | 24.69 |
| PF12363        | 0 | 32.0 0  | 0 0 | 0 0 | 0 0 | 0 0 | 0 0 | 19.85 |
| PF12597        | 0 | 48.0 0  | 0 0 | 0 0 | 0 0 | 0 0 | 0 0 | 29.59 |
| PTHR10037-Sf60 | 0 | 5.0 0   | 0 0 | 0 0 | 0 0 | 0 0 | 0 0 | 17.02 |
| PTHR10074-Sf11 | 0 | 10.0 0  | 0 0 | 0 0 | 0 0 | 0 0 | 0 0 | 26.19 |
| PTHR10074-Sf14 | 0 | 17.0 0  | 0 0 | 0 0 | 0 0 | 0 0 | 0 0 | 27.66 |
| PTHR10074-Sf2  | 0 | 12.0 0  | 0 0 | 0 0 | 0 0 | 0 0 | 0 0 | 34.07 |
| PTHR10074-Sf28 | 0 | 5.0 0   | 0 0 | 0 0 | 0 0 | 0 0 | 0 0 | 10.51 |
| PTHR10074-Sf29 | 0 | 14.0 0  | 0 0 | 0 0 | 0 0 | 0 0 | 0 0 | 8.98  |
| PTHR10074-Sf3  | 0 | 10.0 0  | 0 0 | 0 0 | 0 0 | 0 0 | 0 0 | 8.38  |
| PTHR10074-Sf4  | 0 | 13.0 0  | 0 0 | 0 0 | 0 0 | 0 0 | 0 0 | 22.22 |
| PTHR10074-Sf5  | 0 | 12.0 0  | 0 0 | 0 0 | 0 0 | 0 0 | 0 0 | 12.42 |
| PTHR10074-Sf57 | 0 | 47.0 0  | 0 0 | 0 0 | 0 0 | 0 0 | 0 0 | 7.78  |
| PTHR10074-Sf7  | 0 | 44.0 0  | 0 0 | 0 0 | 0 0 | 0 0 | 0 0 | 7.62  |
| PTHR10121      | 0 | 7.0 0   | 0 0 | 0 0 | 0 0 | 0 0 | 0 0 | 32.33 |
| PTHR10153-Sf1  | 0 | 8.0 0   | 0 0 | 0 0 | 0 0 | 0 0 | 0 0 | 68.52 |
| PTHR10160      | 0 | 16.0 0  | 0 0 | 0 0 | 0 0 | 0 0 | 0 0 | 74.87 |
| PTHR10160-Sf2  | 0 | 97.0 0  | 0 0 | 0 0 | 0 0 | 0 0 | 0 0 | 72.7  |
| PTHR10183-Sf6  | 0 | 8.0 0   | 0 0 | 0 0 | 0 0 | 0 0 | 0 0 | 90.86 |
| PTHR10194-Sf7  | 0 | 9.0 0   | 0 0 | 0 0 | 0 0 | 0 0 | 0 0 | 58.96 |
| PTHR10210      | 0 | 25.0 0  | 0 0 | 0 0 | 0 0 | 0 0 | 0 0 | 33.25 |
| PTHR10229      | 0 | 8.0 0   | 0 0 | 111 | 0 0 | 0 0 | 0 0 | 15.44 |
| PTHR10271      | 0 | 30.0 0  | 0 0 | 0 0 | 0 0 | 0 0 | 0 0 | 43.47 |
| PTHR10279-Sf2  | 0 | 3.0 0   | 0 0 | 0 0 | 0 0 | 0 0 | 0 0 | 76.08 |
| PTHR10281-Sf1  | 0 | 48.0 0  | 0 0 | 0 0 | 0 0 | 0 0 | 0 0 | 50.05 |
| PTHR10283-Sf41 | 0 | 6.0 0   | 0 0 | 0 0 | 0 0 | 0 0 | 0 0 | 34.57 |
| PTHR10285      | 0 | 38.0 0  | 0 0 | 0 0 | 0 0 | 0 0 | 0 0 | 14.39 |
| PTHR10285-Sf1  | 0 | 61.0 0  | 0 0 | 0 0 | 0 0 | 0 0 | 0 0 | 31.58 |
| PTHR10333-Sf22 | 0 | 10.0 0  | 0 0 | 0 0 | 0 0 | 0 0 | 0 0 | 59.01 |
| PTHR10340      | 0 | 12.0 0  | 0 0 | 0 0 | 0 0 | 0 0 | 0 0 | 15.16 |
| PTHR10340-Sf14 | 0 | 17.0 0  | 0 0 | 0 0 | 0 0 | 0 0 | 0 0 | 52.34 |
| PTHR10356      | 0 | 27.0 0  | 0 0 | 0 0 | 0 0 | 0 0 | 0 0 | 75.52 |
| PTHR10357-Sf24 | 0 | 5.0 0   | 0 0 | 0 0 | 0 0 | 0 0 | 0 0 | 35.71 |
| PTHR10366-Sf3  | 0 | 6.0 0   | 0 0 | 0 0 | 0 0 | 0 0 | 0 0 | 17.55 |
| PTHR10374      | 0 | 28.0 0  | 0 0 | 0 0 | 0 0 | 0 0 | 0 0 | 58.87 |
| PTHR10410-Sf3  | 0 | 10.0 0  | 0 0 | 0 0 | 0 0 | 0 0 | 0 0 | 23.61 |
| PTHR10414-Sf17 | 0 | 5.0 0   | 0 0 | 0 0 | 0 0 | 0 0 | 0 0 | 37.3  |
| PTHR10432-Sf51 | 0 | 6.0 0   | 0 0 | 0 0 | 0 0 | 0 0 | 0 0 | 44    |
| PTHR10432-Sf56 | 0 | 13.0 0  | 0 0 | 0 0 | 0 0 | 0 0 | 0 0 | 16.91 |
| PTHR10476-Sf2  | 0 | 11.0 0  | 0 0 | 0 0 | 0 0 | 0 0 | 0 0 | 37.93 |
| PTHR10499-Sf40 | 0 | 13.0 0  | 0 0 | 0 0 | 0 0 | 0 0 | 0 0 | 28.06 |
| PTHR10499-Sf46 | 0 | 7.0 0   | 0 0 | 0 0 | 0 0 | 0 0 | 0 0 | 16.08 |
| PTHR10499-Sf5  | 0 | 8.0 0   | 0 0 | 0 0 | 0 0 | 0 0 | 0 0 | 79.89 |
| PTHR10499-Sf51 | 0 | 16.0 0  | 0 0 | 0 0 | 0 0 | 0 0 | 0 0 | 30.72 |
| PTHR10499-Sf52 | 0 | 17.0 0  | 0 0 | 0 0 | 0 0 | 0 0 | 0 0 | 46.11 |
| PTHR10514-Sf3  | 0 | 5.0 0   | 0 0 | 0 0 | 0 0 | 0 0 | 0 0 | 89.2  |
| PTHR10516-Sf31 | 0 | 23.0 0  | 0 0 | 0 0 | 0 0 | 0 0 | 0 0 | 43.75 |
| PTHR10527-Sf5  | 0 | 19.0 0  | 0 0 | 0 0 | 0 0 | 0 0 | 0 0 | 10.81 |
| PTHR10527-Sf6  | 0 | 14.0 0  | 0 0 | 0 0 | 0 0 | 0 0 | 0 0 | 18.82 |

|                 |   |         |     |     |     |       |     |       |
|-----------------|---|---------|-----|-----|-----|-------|-----|-------|
| PTHR10539       | 0 | 10 0 0  | 0 0 | 0 0 | 0 0 | 0 0   | 0 0 | 14.48 |
| PTHR10566-Sf7   | 0 | 18 0 0  | 0 0 | 0 0 | 0 0 | 0 0   | 0 0 | 12.4  |
| PTHR10628-Sf7   | 0 | 15 0 0  | 0 0 | 0 0 | 0 0 | 0 0   | 0 0 | 57.73 |
| PTHR10662-Sf2   | 0 | 6 0 0   | 0 0 | 0 0 | 0 0 | 0 0   | 0 0 | 81.81 |
| PTHR10663-Sf13  | 0 | 3 0 0   | 0 0 | 0 0 | 0 0 | 0 0   | 0 0 | 40.13 |
| PTHR10668-Sf4   | 0 | 10 0 0  | 0 0 | 0 0 | 0 0 | 0 0   | 0 0 | 26.69 |
| PTHR10740-Sf1   | 0 | 13 0 0  | 0 0 | 0 0 | 0 0 | 0 0   | 0 0 | 94.08 |
| PTHR10779       | 0 | 22 0 0  | 0 0 | 0 0 | 0 0 | 0 0   | 0 0 | 41.33 |
| PTHR10796-Sf35  | 0 | 5 0 0   | 0 0 | 0 0 | 0 0 | 0 0   | 0 0 | 26.77 |
| PTHR10825-Sf1   | 0 | 10 0 0  | 0 0 | 0 0 | 0 0 | 0 0   | 0 0 | 49.95 |
| PTHR10827-Sf1   | 0 | 4 0 0   | 0 0 | 0 0 | 0 0 | 0 0   | 0 0 | 81.42 |
| PTHR10887-Sf14  | 0 | 20 0 0  | 0 0 | 0 0 | 0 0 | 0 0   | 0 0 | 55.66 |
| PTHR10887-Sf26  | 0 | 6 0 0   | 0 0 | 0 0 | 0 0 | 0 0   | 0 0 | 39.01 |
| PTHR10887-Sf3   | 0 | 11 0 0  | 0 0 | 0 0 | 0 0 | 0 0   | 0 0 | 59.94 |
| PTHR10887-Sf5   | 0 | 44 0 0  | 0 0 | 0 0 | 0 0 | 0 0   | 0 0 | 41.08 |
| PTHR10887-Sf6   | 0 | 59 0 0  | 0 0 | 0 0 | 0 0 | 0 0   | 0 0 | 17.89 |
| PTHR10924       | 0 | 13 0 0  | 0 0 | 0 0 | 0 0 | 0 0   | 0 0 | 24.17 |
| PTHR10943-Sf1   | 0 | 5 0 0   | 0 0 | 0 0 | 0 0 | 0 0   | 0 0 | 25.41 |
| PTHR10957-Sf2   | 0 | 14 0 0  | 0 0 | 0 0 | 0 0 | 0 0   | 0 0 | 86.24 |
| PTHR10963-Sf2   | 0 | 38 0 0  | 0 0 | 0 0 | 0 0 | 0 0   | 0 0 | 57.64 |
| PTHR10967-Sf26  | 0 | 5 0 0   | 0 0 | 0 0 | 0 0 | 0 0   | 0 0 | 35.19 |
| PTHR10992-Sf17  | 0 | 88 0 0  | 0 0 | 0 0 | 0 0 | 0 0   | 0 0 | 7.53  |
| PTHR10992-Sf20  | 0 | 98 0 0  | 0 0 | 0 0 | 0 0 | 0 0   | 0 0 | 11.25 |
| PTHR10996-Sf1   | 0 | 36 0 0  | 0 0 | 0 0 | 0 0 | 0 0   | 0 0 | 52.6  |
| PTHR10997-Sf7   | 0 | 8 0 0   | 0 0 | 0 0 | 0 0 | 0 0   | 0 0 | 21.56 |
| PTHR11019       | 0 | 6 0 0   | 0 0 | 0 0 | 0 0 | 0 0   | 0 0 | 26.77 |
| PTHR11063       | 0 | 6 0 0   | 0 0 | 0 0 | 0 0 | 0 0   | 0 0 | 45.03 |
| PTHR11064-Sf1   | 0 | 13 0 0  | 0 0 | 0 0 | 0 0 | 0 0   | 0 0 | 32.77 |
| PTHR11065       | 0 | 39 0 0  | 0 0 | 0 0 | 0 0 | 0 0   | 0 0 | 20.97 |
| PTHR11076-Sf1   | 0 | 34 0 0  | 0 0 | 0 0 | 0 0 | 0 0   | 0 0 | 54.37 |
| PTHR11143-Sf2   | 0 | 10 0 0  | 0 0 | 0 0 | 0 0 | 0 0   | 0 0 | 41.01 |
| PTHR11199       | 0 | 17 0 0  | 0 0 | 0 0 | 0 0 | 0 0   | 0 0 | 29.25 |
| PTHR11201-Sf236 | 0 | 47 0 0  | 0 0 | 0 0 | 0 0 | 0 0   | 0 0 | 42.05 |
| PTHR11201-Sf38  | 0 | 13 0 0  | 0 0 | 0 0 | 0 0 | 0 0   | 0 0 | 71.96 |
| PTHR11203-Sf4   | 0 | 60 0 0  | 0 0 | 0 0 | 0 0 | 0 0   | 0 0 | 47.09 |
| PTHR11210       | 0 | 56 0 0  | 0 0 | 0 0 | 0 0 | 0 0   | 0 0 | 48.97 |
| PTHR11210-Sf1   | 0 | 15 0 0  | 0 0 | 0 0 | 0 0 | 0 0   | 0 0 | 68.94 |
| PTHR11210-Sf2   | 0 | 65 0 0  | 0 0 | 0 0 | 0 0 | 0 0   | 0 0 | 74.15 |
| PTHR11210-Sf3   | 0 | 20 0 0  | 0 0 | 0 0 | 0 0 | 0 0   | 0 0 | 79.06 |
| PTHR11227-Sf17  | 0 | 20 0 0  | 0 0 | 0 0 | 0 0 | 0 0   | 0 0 | 33.64 |
| PTHR11227-Sf18  | 0 | 26 0 0  | 0 0 | 0 0 | 0 0 | 0 0   | 0 0 | 21.56 |
| PTHR11246-Sf3   | 0 | 8 0 0   | 0 0 | 0 0 | 0 0 | 0 0   | 0 0 | 23.36 |
| PTHR11246-Sf5   | 0 | 29 0 0  | 0 0 | 0 0 | 0 0 | 0 0   | 0 0 | 52.7  |
| PTHR11260-Sf10  | 0 | 19 0 0  | 0 0 | 0 0 | 0 0 | 0 0   | 0 0 | 56.17 |
| PTHR11260-Sf1   | 0 | 32 0 0  | 0 0 | 0 0 | 0 0 | 0 0   | 0 0 | 44.21 |
| PTHR11260-Sf16  | 0 | 11 0 0  | 0 0 | 0 0 | 0 0 | 0 0   | 0 0 | 14.49 |
| PTHR11260-Sf6   | 0 | 5 0 0   | 0 0 | 0 0 | 0 0 | 0 0   | 0 0 | 40.88 |
| PTHR11269-Sf14  | 0 | 5 0 0   | 0 0 | 0 0 | 0 0 | 0 0   | 0 0 | 39.31 |
| PTHR11276-Sf2   | 0 | 10 0 0  | 0 0 | 0 0 | 0 0 | 0 0   | 0 0 | 57.68 |
| PTHR11337-Sf7   | 0 | 6 0 0   | 0 0 | 0 0 | 0 0 | 0 0   | 0 0 | 52.92 |
| PTHR11351-Sf14  | 0 | 7 0 0   | 0 0 | 0 0 | 0 0 | 0 0   | 0 0 | 36.39 |
| PTHR11360-Sf9   | 0 | 28 0 0  | 0 0 | 0 0 | 0 0 | 0 0   | 0 0 | 18.4  |
| PTHR11375       | 0 | 31 0 0  | 0 0 | 0 0 | 0 0 | 0 0   | 0 0 | 39.79 |
| PTHR11494-Sf6   | 0 | 7 0 0   | 0 0 | 0 0 | 0 0 | 0 0   | 0 0 | 76.49 |
| PTHR11521-Sf1   | 0 | 8 0 0   | 0 0 | 0 0 | 0 0 | 0 0   | 0 0 | 45.84 |
| PTHR11527       | 0 | 13 0 0  | 0 0 | 0 0 | 0 0 | 0 0   | 0 0 | 16.52 |
| PTHR11527-Sf15  | 0 | 18 0 0  | 0 0 | 0 0 | 0 0 | 0 0   | 0 0 | 38.6  |
| PTHR11533-Sf38  | 0 | 9 0 0   | 0 0 | 0 0 | 0 0 | 0 0   | 0 0 | 25.77 |
| PTHR11540       | 0 | 8 0 0   | 0 0 | 0 0 | 0 0 | 0 0   | 0 0 | 21.71 |
| PTHR11566-Sf19  | 0 | 7 0 0   | 0 0 | 0 0 | 0 0 | 0 0   | 0 0 | 15.94 |
| PTHR11571       | 0 | 12 0 0  | 0 0 | 0 0 | 0 0 | 0 0   | 0 0 | 58.34 |
| PTHR11600-Sf22  | 0 | 7 0 0   | 0 0 | 0 0 | 0 0 | 0 0   | 0 0 | 20.73 |
| PTHR11600-Sf38  | 0 | 8 0 0   | 0 0 | 0 0 | 0 0 | 0 0   | 0 0 | 25.2  |
| PTHR11614-Sf20  | 0 | 18 0 0  | 0 0 | 0 0 | 0 0 | 0 0   | 0 0 | 18.12 |
| PTHR11647-Sf2   | 0 | 39 0 0  | 0 0 | 0 0 | 0 0 | 0 0   | 0 0 | 21.61 |
| PTHR11654       | 0 | 8 0 0   | 0 0 | 0 0 | 0 0 | 0 0   | 0 0 | 29.47 |
| PTHR11654-Sf37  | 0 | 34 0 0  | 0 0 | 0 0 | 0 0 | 0 0   | 0 0 | 16.49 |
| PTHR11662-Sf30  | 0 | 7 0 0   | 0 0 | 0 0 | 0 0 | 0 0   | 0 0 | 34.45 |
| PTHR11662-Sf3   | 0 | 45 0 0  | 0 0 | 0 0 | 0 0 | 0 0   | 0 0 | 9.36  |
| PTHR11662-Sf4   | 0 | 15 0 0  | 0 0 | 0 0 | 0 0 | 0 0   | 0 0 | 13.78 |
| PTHR11695-Sf31  | 0 | 6 0 0   | 0 0 | 0 0 | 0 0 | 0 0   | 0 0 | 13.48 |
| PTHR11695-Sf5   | 0 | 16 0 0  | 0 0 | 0 0 | 0 0 | 0 0   | 0 0 | 15.75 |
| PTHR11697-Sf2   | 0 | 9 0 0   | 0 0 | 0 0 | 0 0 | 0 0   | 0 0 | 52.73 |
| PTHR11697-Sf3   | 0 | 3 0 0   | 0 0 | 0 0 | 0 0 | 0 0   | 0 0 | 94.07 |
| PTHR11712-Sf23  | 0 | 14 0 0  | 0 0 | 0 0 | 0 0 | 0 0   | 0 0 | 48.99 |
| PTHR11732-Sf2   | 0 | 32 0 0  | 0 0 | 0 0 | 0 0 | 0 0   | 0 0 | 70.86 |
| PTHR11733-Sf2   | 0 | 11 0 0  | 0 0 | 0 0 | 0 0 | 0 0   | 0 0 | 80.37 |
| PTHR11738-Sf13  | 0 | 5 0 0   | 0 0 | 0 0 | 0 0 | 0 0   | 0 0 | 39.09 |
| PTHR11751-Sf21  | 0 | 5 0 0   | 0 0 | 0 0 | 0 0 | 0 0   | 0 0 | 31.32 |
| PTHR11751-Sf29  | 0 | 6 0 0   | 0 0 | 0 0 | 0 0 | 0 0   | 0 0 | 23.12 |
| PTHR11785-Sf58  | 0 | 9 0 0   | 0 0 | 0 0 | 0 0 | 0 0   | 0 0 | 29.64 |
| PTHR11845       | 0 | 83 0 0  | 0 0 | 0 0 | 0 0 | 0 0   | 0 0 | 31.72 |
| PTHR11851-Sf58  | 0 | 9 0 0   | 0 0 | 0 0 | 0 0 | 0 0   | 0 0 | 30.89 |
| PTHR11852       | 0 | 49 0 0  | 0 0 | 0 0 | 0 0 | 0 0   | 0 0 | 32.35 |
| PTHR11915-Sf30  | 0 | 6 0 0   | 0 0 | 0 0 | 0 0 | 0 0   | 0 0 | 57.94 |
| PTHR11926-Sf15  | 0 | 116 0 0 | 0 0 | 0 0 | 0 0 | 0 0   | 0 0 | 13.76 |
| PTHR11938-Sf4   | 0 | 13 0 0  | 0 0 | 0 0 | 0 0 | 0 0   | 0 0 | 37.5  |
| PTHR11938-Sf8   | 0 | 86 0 0  | 0 0 | 0 0 | 0 0 | 0 0   | 0 0 | 80.9  |
| PTHR11941       | 0 | 20 0 0  | 0 0 | 0 0 | 0 0 | 0 0   | 0 0 | 22.59 |
| PTHR11953       | 0 | 13 0 0  | 0 0 | 0 0 | 0 0 | 0 0   | 0 0 | 42.23 |
| PTHR11968-Sf26  | 0 | 10 0 0  | 0 0 | 0 0 | 0 0 | 0 0   | 0 0 | 20.9  |
| PTHR11999-Sf5   | 0 | 6 0 0   | 0 0 | 0 0 | 0 0 | 0 0   | 0 0 | 31.63 |
| PTHR12011-Sf12  | 0 | 30 0 0  | 0 0 | 0 0 | 0 0 | 0 0   | 0 0 | 22.1  |
| PTHR12011-Sf3   | 0 | 15 0 0  | 0 0 | 0 0 | 0 0 | 0 0   | 0 0 | 47.05 |
| PTHR12097       | 0 | 20 0 0  | 0 0 | 0 0 | 0 0 | 0 0   | 0 0 | 37.23 |
| PTHR12106-Sf6   | 0 | 12 0 0  | 0 0 | 0 0 | 0 0 | 0 0   | 0 0 | 22.64 |
| PTHR12187-Sf3   | 0 | 12 0 0  | 0 0 | 0 0 | 0 0 | 0 0   | 0 0 | 77.56 |
| PTHR12187-Sf4   | 0 | 11 0 0  | 0 0 | 0 0 | 0 0 | 0 0   | 0 0 | 85.37 |
| PTHR12209       | 0 | 9 0 0   | 0 0 | 0 0 | 0 0 | 0 0   | 0 0 | 32.62 |
| PTHR12242       | 0 | 87 0 0  | 0 0 | 0 0 | 0 0 | 0 0   | 0 0 | 31.67 |
| PTHR12270-Sf3   | 0 | 23 0 0  | 0 0 | 0 0 | 0 0 | 0 0   | 0 0 | 52.94 |
| PTHR12277-Sf8   | 0 | 42 0 0  | 0 0 | 0 0 | 0 0 | 0 0   | 0 0 | 40.28 |
| PTHR12286       | 0 | 7 0 0   | 0 0 | 0 0 | 0 0 | 0 0   | 0 0 | 17.29 |
| PTHR12289-Sf11  | 0 | 8 0 0   | 0 0 | 0 0 | 0 0 | 0 0   | 0 0 | 55.92 |
| PTHR12289-Sf17  | 0 | 65 0 0  | 0 0 | 0 0 | 0 0 | 0 0   | 0 0 | 30.51 |
| PTHR12289-Sf9   | 0 | 13 0 0  | 0 0 | 0 0 | 0 0 | 0 0   | 0 0 | 53.09 |
| PTHR12294-Sf2   | 0 | 4 0 0   | 0 0 | 0 0 | 0 0 | 0 0   | 0 0 | 47.97 |
| PTHR12295-Sf12  | 0 | 16 0 0  | 0 0 | 0 0 | 0 0 | 0 0   | 0 0 | 46.39 |
| PTHR12295-Sf2   | 0 | 15 0 0  | 0 0 | 0 0 | 0 0 | 0 0   | 0 0 | 54.06 |
| PTHR12311-Sf3   | 0 | 11 0 0  | 0 0 | 0 0 | 0 0 | 0 0   | 0 0 | 50.95 |
| PTHR12324       | 0 | 30 0 0  | 0 0 | 0 0 | 0 0 | 0 0   | 0 0 | 53.13 |
| PTHR12360       | 0 | 21 0 0  | 0 0 | 0 0 | 0 0 | 0 0   | 0 0 | 26.31 |
| PTHR12363-Sf2   | 0 | 8 0 0   | 0 0 | 0 0 | 0 0 | 0 0   | 0 0 | 39.5  |
| PTHR12363-Sf6   | 0 | 20 0 0  | 0 0 | 0 0 | 0 0 | 0 0   | 0 0 | 25.37 |
| PTHR12375-Sf1   | 0 | 19 0 0  | 0 0 | 0 0 | 0 0 | 0 0   | 0 0 | 44    |
| PTHR12380-Sf7   | 0 | 7 0 0   | 0 0 | 0 0 | 0 0 | 0 0   | 0 0 | 40.91 |
| PTHR12381-Sf3   | 0 | 14 0 0  | 0 0 | 0 0 | 0 0 | 0 0   | 0 0 | 77.88 |
| PTHR12396       | 0 | 16 0 0  | 0 0 | 0 0 | 0 0 | 0 0   | 0 0 | 31    |
| PTHR12420-Sf3   | 0 | 23 0 0  | 0 0 | 0 0 | 0 0 | 0 0   | 0 0 | 42.38 |
| PTHR12432       | 0 | 13 0 0  | 0 0 | 0 0 | 0 0 | 0 0   | 0 0 | 28.93 |
| PTHR12444       | 0 | 98 0 0  | 0 0 | 0 0 | 0 0 | 0 0   | 0 0 | 22.97 |
| PTHR12456-Sf8   | 0 | 25 0 0  | 0 0 | 0 0 | 0 0 | 0 0   | 0 0 | 44.34 |
| PTHR12459       | 0 | 80 0 0  | 0 0 | 0 0 | 0 0 | 0 0   | 0 0 | 22.63 |
| PTHR12460       | 0 | 6 0 0   | 0 0 | 0 0 | 0 0 | 0 0   | 0 0 | 36.21 |
| PTHR12463       | 0 | 8 0 0   | 0 0 | 0 0 | 0 0 | 0 0   | 0 0 | 37.24 |
| PTHR12472       | 0 | 35 0 0  | 0 0 | 0 0 | 0 0 | 0 0   | 0 0 | 26.79 |
| PTHR12475       | 0 | 43 0 0  | 0 0 | 0 0 | 0 0 | 0 0   | 0 0 | 34.88 |
| PTHR12475-Sf2   | 0 | 15 0 0  | 0 0 | 0 0 | 0 0 | 0 0   | 0 0 | 73.92 |
| PTHR12475-Sf3   | 0 | 12 0 0  | 0 0 | 0 0 | 0 0 | 0 0   | 0 0 | 81.78 |
| PTHR12479-Sf1   | 0 | 6 0 0   | 0 0 | 0 0 | 0 0 | 0 0   | 0 0 | 91.44 |
| PTHR12484       | 0 | 28 0 0  | 0 0 | 0 0 | 0 0 | 0 0   | 0 0 | 44.75 |
| PTHR12487       | 0 | 10 0 0  | 0 0 | 0 0 | 0 0 | 0 0   | 0 0 | 34.85 |
| PTHR12487-Sf1   | 0 | 5 0 0   | 0 0 | 0 0 | 0 0 | 0 0   | 0 0 | 54.25 |
| PTHR12513       | 0 | 38 0 0  | 0 0 | 0 0 | 0 0 | 0 0   | 0 0 | 31.12 |
| PTHR12516       | 0 | 17 0 0  | 0 0 | 0 0 | 0 0 | 0 0   | 0 0 | 57.56 |
| PTHR12519       | 0 | 46 0 0  | 0 0 | 0 0 | 0 0 | 0 0   | 0 0 | 32.63 |
| PTHR12522       | 0 | 27 0 0  | 0 0 | 0 0 | 0 0 | 0 0   | 0 0 | 53.74 |
| PTHR12526-Sf8   | 0 | 13 0 0  | 0 0 | 0 0 | 0 0 | 0 0   | 0 0 | 6.6   |
| PTHR12526-Sf9   | 0 | 16 0 0  | 0 0 | 0 0 | 0 0 | 0 0   | 0 0 | 17.67 |
| PTHR12553-Sf3   | 0 | 11 0 0  | 0 0 | 0 0 | 0 0 | 0 0   | 0 0 | 30.73 |
| PTHR12553-Sf4   | 0 | 12 0 0  | 0 0 | 0 0 | 0 0 | 0 0   | 0 0 | 43.39 |
| PTHR12566       | 0 | 26 0 0  | 0 0 | 0 0 | 0 0 | 0 0   | 0 0 | 56.09 |
| PTHR12581       | 0 | 37 0 0  | 0 0 | 0 0 | 0 0 | 0 0   | 0 0 | 53.19 |
| PTHR12586       | 0 | 35 0 0  | 0 0 | 0 0 | 0 0 | 0 0   | 0 0 | 30.97 |
| PTHR12587-Sf6   | 0 | 4 0 0   | 0 0 | 0 0 | 0 0 | 0 0</ |     |       |

|                |   |       |     |     |     |     |     |       |
|----------------|---|-------|-----|-----|-----|-----|-----|-------|
| PTHR12651      | 0 | 38.0  | 0.0 | 0.0 | 0.0 | 0.0 | 0.0 | 28.22 |
| PTHR12655      | 0 | 95.0  | 0.0 | 0.0 | 0.0 | 0.0 | 0.0 | 32.86 |
| PTHR12658      | 0 | 16.0  | 0.0 | 0.0 | 0.0 | 0.0 | 0.0 | 15.76 |
| PTHR12663      | 0 | 116.0 | 0.0 | 0.0 | 0.0 | 0.0 | 0.0 | 18.92 |
| PTHR12681      | 0 | 14.0  | 0.0 | 0.0 | 0.0 | 0.0 | 0.0 | 27.62 |
| PTHR12686      | 0 | 5.0   | 0.0 | 0.0 | 0.0 | 0.0 | 0.0 | 22.9  |
| PTHR12701-SF1  | 0 | 10.0  | 0.0 | 0.0 | 0.0 | 0.0 | 0.0 | 28    |
| PTHR12703      | 0 | 10.0  | 0.0 | 0.0 | 0.0 | 0.0 | 0.0 | 28.68 |
| PTHR12714      | 0 | 38.0  | 0.0 | 0.0 | 0.0 | 0.0 | 0.0 | 18.98 |
| PTHR12716-SF8  | 0 | 8.0   | 0.0 | 0.0 | 0.0 | 0.0 | 0.0 | 59.82 |
| PTHR12716-SF9  | 0 | 3.0   | 0.0 | 0.0 | 0.0 | 0.0 | 0.0 | 47.15 |
| PTHR12725-SF5  | 0 | 13.0  | 0.0 | 0.0 | 0.0 | 0.0 | 0.0 | 39.01 |
| PTHR12732      | 0 | 18.0  | 0.0 | 0.0 | 0.0 | 0.0 | 0.0 | 28.15 |
| PTHR12760      | 0 | 63.0  | 0.0 | 0.0 | 0.0 | 0.0 | 0.0 | 34.36 |
| PTHR12761      | 0 | 33.0  | 0.0 | 0.0 | 0.0 | 0.0 | 0.0 | 45.24 |
| PTHR12763-SF2  | 0 | 5.0   | 0.0 | 0.0 | 0.0 | 0.0 | 0.0 | 73.31 |
| PTHR12771-SF9  | 0 | 11.0  | 0.0 | 0.0 | 0.0 | 0.0 | 0.0 | 98.71 |
| PTHR12778-SF2  | 0 | 13.0  | 0.0 | 0.0 | 0.0 | 0.0 | 0.0 | 31.71 |
| PTHR12778-SF3  | 0 | 58.0  | 0.0 | 0.0 | 0.0 | 0.0 | 0.0 | 44.38 |
| PTHR12791      | 0 | 29.0  | 0.0 | 0.0 | 0.0 | 0.0 | 0.0 | 35.86 |
| PTHR12816-SF5  | 0 | 5.0   | 0.0 | 0.0 | 0.0 | 0.0 | 0.0 | 69.41 |
| PTHR12820      | 0 | 3.0   | 0.0 | 0.0 | 0.0 | 0.0 | 0.0 | 53.63 |
| PTHR12826-SF3  | 0 | 9.0   | 0.0 | 0.0 | 0.0 | 0.0 | 0.0 | 71.54 |
| PTHR12827      | 0 | 55.0  | 0.0 | 0.0 | 0.0 | 0.0 | 0.0 | 38.23 |
| PTHR12830-SF1  | 0 | 16.0  | 0.0 | 0.0 | 0.0 | 0.0 | 0.0 | 78.42 |
| PTHR12830-SF3  | 0 | 21.0  | 0.0 | 0.0 | 0.0 | 0.0 | 0.0 | 51.67 |
| PTHR12830-SF4  | 0 | 5.0   | 0.0 | 0.0 | 0.0 | 0.0 | 0.0 | 78.89 |
| PTHR12830-SF8  | 0 | 20.0  | 0.0 | 0.0 | 0.0 | 0.0 | 0.0 | 66.78 |
| PTHR12843      | 0 | 9.0   | 0.0 | 0.0 | 0.0 | 0.0 | 0.0 | 35.7  |
| PTHR12860      | 0 | 83.0  | 0.0 | 0.0 | 0.0 | 0.0 | 0.0 | 27.14 |
| PTHR12873      | 0 | 12.0  | 0.0 | 0.0 | 0.0 | 0.0 | 0.0 | 47.85 |
| PTHR12899      | 0 | 17.0  | 0.0 | 0.0 | 0.0 | 0.0 | 0.0 | 49.36 |
| PTHR12932-SF10 | 0 | 4.0   | 0.0 | 0.0 | 0.0 | 0.0 | 0.0 | 80    |
| PTHR12934-SF1  | 0 | 10.0  | 0.0 | 0.0 | 0.0 | 0.0 | 0.0 | 60.37 |
| PTHR12963      | 0 | 12.0  | 0.0 | 0.0 | 0.0 | 0.0 | 0.0 | 20.84 |
| PTHR12972      | 0 | 38.0  | 0.0 | 0.0 | 0.0 | 0.0 | 0.0 | 26.65 |
| PTHR12975      | 0 | 76.0  | 0.0 | 0.0 | 0.0 | 0.0 | 0.0 | 22.55 |
| PTHR12979-SF2  | 0 | 8.0   | 0.0 | 0.0 | 0.0 | 0.0 | 0.0 | 84.79 |
| PTHR12979-SF4  | 0 | 12.0  | 0.0 | 0.0 | 0.0 | 0.0 | 0.0 | 46.27 |
| PTHR12981      | 0 | 22.0  | 0.0 | 0.0 | 0.0 | 0.0 | 0.0 | 37.46 |
| PTHR12984      | 0 | 12.0  | 0.0 | 0.0 | 0.0 | 0.0 | 0.0 | 19.93 |
| PTHR12984-SF3  | 0 | 16.0  | 0.0 | 0.0 | 0.0 | 0.0 | 0.0 | 21.76 |
| PTHR12988      | 0 | 5.0   | 0.0 | 0.0 | 0.0 | 0.0 | 0.0 | 46.3  |
| PTHR12988-SF1  | 0 | 18.0  | 0.0 | 0.0 | 0.0 | 0.0 | 0.0 | 54.95 |
| PTHR12988-SF3  | 0 | 13.0  | 0.0 | 0.0 | 0.0 | 0.0 | 0.0 | 63.29 |
| PTHR13000      | 0 | 66.0  | 0.0 | 0.0 | 0.0 | 0.0 | 0.0 | 23.33 |
| PTHR13020-SF4  | 0 | 4.0   | 0.0 | 0.0 | 0.0 | 0.0 | 0.0 | 35.43 |
| PTHR13024      | 0 | 5.0   | 0.0 | 0.0 | 0.0 | 0.0 | 0.0 | 20.2  |
| PTHR13036      | 0 | 21.0  | 0.0 | 0.0 | 0.0 | 0.0 | 0.0 | 48.17 |
| PTHR13042      | 0 | 17.0  | 0.0 | 0.0 | 0.0 | 0.0 | 0.0 | 70.39 |
| PTHR13047      | 0 | 47.0  | 0.0 | 0.0 | 0.0 | 0.0 | 0.0 | 54.55 |
| PTHR13049      | 0 | 7.0   | 0.0 | 0.0 | 0.0 | 0.0 | 0.0 | 61.83 |
| PTHR13058-SF5  | 0 | 15.0  | 0.0 | 0.0 | 0.0 | 0.0 | 0.0 | 53.15 |
| PTHR13061      | 0 | 263.0 | 0.0 | 0.0 | 0.0 | 0.0 | 0.0 | 38.38 |
| PTHR13063-SF2  | 0 | 8.0   | 0.0 | 0.0 | 0.0 | 0.0 | 0.0 | 62    |
| PTHR13072      | 0 | 48.0  | 0.0 | 0.0 | 0.0 | 0.0 | 0.0 | 33.76 |
| PTHR13077-SF3  | 0 | 7.0   | 0.0 | 0.0 | 0.0 | 0.0 | 0.0 | 71.71 |
| PTHR13083      | 0 | 18.0  | 0.0 | 0.0 | 0.0 | 0.0 | 0.0 | 61.2  |
| PTHR13090      | 0 | 26.0  | 0.0 | 0.0 | 0.0 | 0.0 | 0.0 | 25.91 |
| PTHR13098      | 0 | 22.0  | 0.0 | 0.0 | 0.0 | 0.0 | 0.0 | 52.95 |
| PTHR13123-SF2  | 0 | 15.0  | 0.0 | 0.0 | 0.0 | 0.0 | 0.0 | 78.16 |
| PTHR13123-SF3  | 0 | 15.0  | 0.0 | 0.0 | 0.0 | 0.0 | 0.0 | 72.08 |
| PTHR13136      | 0 | 18.0  | 0.0 | 0.0 | 0.0 | 0.0 | 0.0 | 28.01 |
| PTHR13143      | 0 | 29.0  | 0.0 | 0.0 | 0.0 | 0.0 | 0.0 | 36.77 |
| PTHR13146      | 0 | 21.0  | 0.0 | 0.0 | 0.0 | 0.0 | 0.0 | 22.18 |
| PTHR13163      | 0 | 28.0  | 0.0 | 0.0 | 0.0 | 0.0 | 0.0 | 48.67 |
| PTHR13166      | 0 | 7.0   | 0.0 | 0.0 | 0.0 | 0.0 | 0.0 | 15.53 |
| PTHR13167-SF2  | 0 | 8.0   | 0.0 | 0.0 | 0.0 | 0.0 | 0.0 | 25.41 |
| PTHR13168      | 0 | 38.0  | 0.0 | 0.0 | 0.0 | 0.0 | 0.0 | 43.53 |
| PTHR13169      | 0 | 23.0  | 0.0 | 0.0 | 0.0 | 0.0 | 0.0 | 69.42 |
| PTHR13177      | 0 | 37.0  | 0.0 | 0.0 | 0.0 | 0.0 | 0.0 | 41.41 |
| PTHR13191      | 0 | 58.0  | 0.0 | 0.0 | 0.0 | 0.0 | 0.0 | 26.95 |
| PTHR13205-SF8  | 0 | 18.0  | 0.0 | 0.0 | 0.0 | 0.0 | 0.0 | 40    |
| PTHR13219      | 0 | 17.0  | 0.0 | 0.0 | 0.0 | 0.0 | 0.0 | 38.1  |
| PTHR13225      | 0 | 30.0  | 0.0 | 0.0 | 0.0 | 0.0 | 0.0 | 47.26 |
| PTHR13231      | 0 | 23.0  | 0.0 | 0.0 | 0.0 | 0.0 | 0.0 | 53    |
| PTHR13236      | 0 | 12.0  | 0.0 | 0.0 | 0.0 | 0.0 | 0.0 | 35.96 |
| PTHR13244      | 0 | 7.0   | 0.0 | 0.0 | 0.0 | 0.0 | 0.0 | 12.17 |
| PTHR13247      | 0 | 59.0  | 0.0 | 0.0 | 0.0 | 0.0 | 0.0 | 31.54 |
| PTHR13252      | 0 | 6.0   | 0.0 | 0.0 | 0.0 | 0.0 | 0.0 | 52.98 |
| PTHR13260      | 0 | 24.0  | 0.0 | 0.0 | 0.0 | 0.0 | 0.0 | 32    |
| PTHR13261      | 0 | 73.0  | 0.0 | 0.0 | 0.0 | 0.0 | 0.0 | 30.23 |
| PTHR13269      | 0 | 4.0   | 0.0 | 0.0 | 0.0 | 0.0 | 0.0 | 81.92 |
| PTHR13278      | 0 | 23.0  | 0.0 | 0.0 | 0.0 | 0.0 | 0.0 | 29.02 |
| PTHR13286-SF1  | 0 | 17.0  | 0.0 | 0.0 | 0.0 | 0.0 | 0.0 | 73.7  |
| PTHR13286-SF2  | 0 | 11.0  | 0.0 | 0.0 | 0.0 | 0.0 | 0.0 | 50.48 |
| PTHR13287      | 0 | 25.0  | 0.0 | 0.0 | 0.0 | 0.0 | 0.0 | 48.03 |
| PTHR13289      | 0 | 20.0  | 0.0 | 0.0 | 0.0 | 0.0 | 0.0 | 56.63 |
| PTHR13293-SF6  | 0 | 51.0  | 0.0 | 0.0 | 0.0 | 0.0 | 0.0 | 45.24 |
| PTHR13312      | 0 | 4.0   | 0.0 | 0.0 | 0.0 | 0.0 | 0.0 | 14.67 |
| PTHR13322      | 0 | 35.0  | 0.0 | 0.0 | 0.0 | 0.0 | 0.0 | 38.39 |
| PTHR13328      | 0 | 25.0  | 0.0 | 0.0 | 0.0 | 0.0 | 0.0 | 49.62 |
| PTHR13333-SF1  | 0 | 18.0  | 0.0 | 0.0 | 0.0 | 0.0 | 0.0 | 65.82 |
| PTHR13333-SF3  | 0 | 3.0   | 0.0 | 0.0 | 0.0 | 0.0 | 0.0 | 76.24 |
| PTHR13342      | 0 | 8.0   | 0.0 | 0.0 | 0.0 | 0.0 | 0.0 | 52.24 |
| PTHR13343      | 0 | 17.0  | 0.0 | 0.0 | 0.0 | 0.0 | 0.0 | 42.26 |
| PTHR13344      | 0 | 8.0   | 0.0 | 0.0 | 0.0 | 0.0 | 0.0 | 34.54 |
| PTHR13347      | 0 | 30.0  | 0.0 | 0.0 | 0.0 | 0.0 | 0.0 | 22.61 |
| PTHR13350      | 0 | 27.0  | 0.0 | 0.0 | 0.0 | 0.0 | 0.0 | 49.98 |
| PTHR13354      | 0 | 22.0  | 0.0 | 0.0 | 0.0 | 0.0 | 0.0 | 58.11 |
| PTHR13356      | 0 | 29.0  | 0.0 | 0.0 | 0.0 | 0.0 | 0.0 | 34.6  |
| PTHR13371      | 0 | 29.0  | 0.0 | 0.0 | 0.0 | 0.0 | 0.0 | 34.25 |
| PTHR13382      | 0 | 27.0  | 0.0 | 0.0 | 0.0 | 0.0 | 0.0 | 43.66 |
| PTHR13388      | 0 | 32.0  | 0.0 | 0.0 | 0.0 | 0.0 | 0.0 | 36.23 |
| PTHR13400      | 0 | 36.0  | 0.0 | 0.0 | 0.0 | 0.0 | 0.0 | 45.88 |
| PTHR13401      | 0 | 24.0  | 0.0 | 0.0 | 0.0 | 0.0 | 0.0 | 46.97 |
| PTHR13402      | 0 | 83.0  | 0.0 | 0.0 | 0.0 | 0.0 | 0.0 | 19.05 |
| PTHR13412      | 0 | 37.0  | 0.0 | 0.0 | 0.0 | 0.0 | 0.0 | 37.68 |
| PTHR13413      | 0 | 22.0  | 0.0 | 0.0 | 0.0 | 0.0 | 0.0 | 34.35 |
| PTHR13420      | 0 | 32.0  | 0.0 | 0.0 | 0.0 | 0.0 | 0.0 | 56.36 |
| PTHR13422-SF1  | 0 | 10.0  | 0.0 | 0.0 | 0.0 | 0.0 | 0.0 | 76.4  |
| PTHR13422-SF2  | 0 | 13.0  | 0.0 | 0.0 | 0.0 | 0.0 | 0.0 | 75.87 |
| PTHR13425      | 0 | 28.0  | 0.0 | 0.0 | 0.0 | 0.0 | 0.0 | 38.85 |
| PTHR13437      | 0 | 28.0  | 0.0 | 0.0 | 0.0 | 0.0 | 0.0 | 45.3  |
| PTHR13438      | 0 | 11.0  | 0.0 | 0.0 | 0.0 | 0.0 | 0.0 | 34.46 |
| PTHR13453      | 0 | 25.0  | 0.0 | 0.0 | 0.0 | 0.0 | 0.0 | 51.91 |
| PTHR13459      | 0 | 32.0  | 0.0 | 0.0 | 0.0 | 0.0 | 0.0 | 58.41 |
| PTHR13463-SF2  | 0 | 8.0   | 0.0 | 0.0 | 0.0 | 0.0 | 0.0 | 74.63 |
| PTHR13466      | 0 | 7.0   | 0.0 | 0.0 | 0.0 | 0.0 | 0.0 | 14.39 |
| PTHR13469-SF1  | 0 | 12.0  | 0.0 | 0.0 | 0.0 | 0.0 | 0.0 | 83.24 |
| PTHR13469-SF4  | 0 | 10.0  | 0.0 | 0.0 | 0.0 | 0.0 | 0.0 | 59.93 |
| PTHR13478      | 0 | 17.0  | 0.0 | 0.0 | 0.0 | 0.0 | 0.0 | 57.37 |
| PTHR13480      | 0 | 32.0  | 0.0 | 0.0 | 0.0 | 0.0 | 0.0 | 48.97 |
| PTHR13491      | 0 | 24.0  | 0.0 | 0.0 | 0.0 | 0.0 | 0.0 | 40.85 |
| PTHR13493      | 0 | 3.0   | 0.0 | 0.0 | 0.0 | 0.0 | 0.0 | 41.01 |
| PTHR13497      | 0 | 29.0  | 0.0 | 0.0 | 0.0 | 0.0 | 0.0 | 49.32 |
| PTHR13502-SF3  | 0 | 5.0   | 0.0 | 0.0 | 0.0 | 0.0 | 0.0 | 94.09 |
| PTHR13518-SF1  | 0 | 6.0   | 0.0 | 0.0 | 0.0 | 0.0 | 0.0 | 47.5  |
| PTHR13518-SF2  | 0 | 13.0  | 0.0 | 0.0 | 0.0 | 0.0 | 0.0 | 74.36 |
| PTHR13528      | 0 | 30.0  | 0.0 | 0.0 | 0.0 | 0.0 | 0.0 | 45.68 |
| PTHR13530      | 0 | 5.0   | 0.0 | 0.0 | 0.0 | 0.0 | 0.0 | 38.8  |
| PTHR13535      | 0 | 8.0   | 0.0 | 0.0 | 0.0 | 0.0 | 0.0 | 56.25 |
| PTHR13541      | 0 | 13.0  | 0.0 | 0.0 | 0.0 | 0.0 | 0.0 | 62.04 |
| PTHR13543      | 0 | 11.0  | 0.0 | 0.0 | 0.0 | 0.0 | 0.0 | 70.87 |
| PTHR13547      | 0 | 16.0  | 0.0 | 0.0 | 0.0 | 0.0 | 0.0 | 52.81 |
| PTHR13555-SF4  | 0 | 6.0   | 0.0 | 0.0 | 0.0 | 0.0 | 0.0 | 82.33 |
| PTHR13557      | 0 | 20.0  | 0.0 | 0.0 | 0.0 | 0.0 | 0.0 | 36.99 |
| PTHR13559      | 0 | 21.0  | 0.0 | 0.0 | 0.0 | 0.0 | 0.0 | 53.3  |
| PTHR13578-SF12 | 0 | 8.0   | 0.0 | 0.0 | 0.0 | 0.0 | 0.0 | 76.23 |
| PTHR13578-SF13 | 0 | 18.0  | 0.0 | 0.0 | 0.0 | 0.0 | 0.0 | 69.55 |
| PTHR13586      | 0 | 10.0  | 0.0 | 0.0 | 0.0 | 0.0 | 0.0 | 26.59 |
| PTHR13589-SF6  | 0 | 10.0  | 0.0 | 0.0 | 0.0 | 0.0 | 0.0 | 79.45 |
| PTHR13601-SF1  | 0 | 14.0  | 0.0 | 0.0 | 0.0 | 0.0 | 0.0 | 74.5  |
| PTHR13601-SF2  | 0 | 12.0  | 0.0 | 0.0 | 0.0 | 0.0 | 0.0 | 87.28 |
| PTHR13602      | 0 | 18.0  | 0.0 | 0.0 | 0.0 | 0.0 | 0.0 | 43.14 |
| PTHR13603      | 0 | 22.0  | 0.0 | 0.0 | 0.0 | 0.0 | 0.0 | 41.3  |
| PTHR13620      | 0 | 15.0  | 0.0 | 0.0 | 0.0 | 0.0 | 0.0 | 20.96 |

|                |   |         |     |     |     |     |     |       |
|----------------|---|---------|-----|-----|-----|-----|-----|-------|
| PTHR13622-SF2  | 0 | 15 0 0  | 0 0 | 0 0 | 0 0 | 0 0 | 0 0 | 36.18 |
| PTHR13626-SF1  | 0 | 6 0 0   | 0 0 | 0 0 | 0 0 | 0 0 | 0 0 | 92.33 |
| PTHR13627      | 0 | 16 0 0  | 0 0 | 0 0 | 0 0 | 0 0 | 0 0 | 83.93 |
| PTHR13628      | 0 | 25 0 0  | 0 0 | 0 0 | 0 0 | 0 0 | 0 0 | 41.53 |
| PTHR13632      | 0 | 17 0 0  | 0 0 | 0 0 | 0 0 | 0 0 | 0 0 | 61.12 |
| PTHR13633      | 0 | 19 0 0  | 0 0 | 0 0 | 0 0 | 0 0 | 0 0 | 56.76 |
| PTHR13634      | 0 | 4 0 0   | 0 0 | 0 0 | 0 0 | 0 0 | 0 0 | 56.59 |
| PTHR13643      | 0 | 23 0 0  | 0 0 | 0 0 | 0 0 | 0 0 | 0 0 | 62.05 |
| PTHR13649      | 0 | 14 0 0  | 0 0 | 0 0 | 0 0 | 0 0 | 0 0 | 66.34 |
| PTHR13650      | 0 | 26 0 0  | 0 0 | 0 0 | 0 0 | 0 0 | 0 0 | 37.68 |
| PTHR13651      | 0 | 11 0 0  | 0 0 | 0 0 | 0 0 | 0 0 | 0 0 | 28.75 |
| PTHR13672      | 0 | 20 0 0  | 0 0 | 0 0 | 0 0 | 0 0 | 0 0 | 76.14 |
| PTHR13673      | 0 | 39 0 0  | 0 0 | 0 0 | 0 0 | 0 0 | 0 0 | 33.8  |
| PTHR13676      | 0 | 20 0 0  | 0 0 | 0 0 | 0 0 | 0 0 | 0 0 | 71.22 |
| PTHR13697      | 0 | 4 0 0   | 0 0 | 0 0 | 0 0 | 0 0 | 0 0 | 9.81  |
| PTHR13743      | 0 | 7 0 0   | 0 0 | 0 0 | 0 0 | 0 0 | 0 0 | 75.12 |
| PTHR13768-SF2  | 0 | 45 0 0  | 0 0 | 0 0 | 0 0 | 0 0 | 0 0 | 33.34 |
| PTHR13768-SF5  | 0 | 19 0 0  | 0 0 | 0 0 | 0 0 | 0 0 | 0 0 | 64.45 |
| PTHR13793-SF1  | 0 | 22 0 0  | 0 0 | 0 0 | 0 0 | 0 0 | 0 0 | 69.03 |
| PTHR13824-SF34 | 0 | 6 0 0   | 0 0 | 0 0 | 0 0 | 0 0 | 0 0 | 65.81 |
| PTHR13824-SF5  | 0 | 11 0 0  | 0 0 | 0 0 | 0 0 | 0 0 | 0 0 | 41.74 |
| PTHR13824-SF6  | 0 | 35 0 0  | 0 0 | 0 0 | 0 0 | 0 0 | 0 0 | 20.36 |
| PTHR13843-SF1  | 0 | 8 0 0   | 0 0 | 0 0 | 0 0 | 0 0 | 0 0 | 69.4  |
| PTHR13843-SF5  | 0 | 5 0 0   | 0 0 | 0 0 | 0 0 | 0 0 | 0 0 | 53.35 |
| PTHR13902-SF6  | 0 | 16 0 0  | 0 0 | 0 0 | 0 0 | 0 0 | 0 0 | 60.07 |
| PTHR13932      | 0 | 8 0 0   | 0 0 | 0 0 | 0 0 | 0 0 | 0 0 | 38.18 |
| PTHR13946-SF16 | 0 | 6 0 0   | 0 0 | 0 0 | 0 0 | 0 0 | 0 0 | 27.82 |
| PTHR13948-SF4  | 0 | 6 0 0   | 0 0 | 0 0 | 0 0 | 0 0 | 0 0 | 77.85 |
| PTHR13952      | 0 | 9 0 0   | 0 0 | 0 0 | 0 0 | 0 0 | 0 0 | 27.11 |
| PTHR13986-SF3  | 0 | 14 0 0  | 0 0 | 0 0 | 0 0 | 0 0 | 0 0 | 85.48 |
| PTHR13986-SF4  | 0 | 4 0 0   | 0 0 | 0 0 | 0 0 | 0 0 | 0 0 | 76.54 |
| PTHR14005      | 0 | 9 0 0   | 0 0 | 0 0 | 0 0 | 0 0 | 0 0 | 23.35 |
| PTHR14027-SF2  | 0 | 8 0 0   | 0 0 | 0 0 | 0 0 | 0 0 | 0 0 | 21.87 |
| PTHR14062      | 0 | 10 0 0  | 0 0 | 0 0 | 0 0 | 0 0 | 0 0 | 41.73 |
| PTHR14124      | 0 | 4 0 0   | 0 0 | 0 0 | 0 0 | 0 0 | 0 0 | 14.09 |
| PTHR14164-SF2  | 0 | 11 0 0  | 0 0 | 0 0 | 0 0 | 0 0 | 0 0 | 71.91 |
| PTHR14194-SF1  | 0 | 18 0 0  | 0 0 | 0 0 | 0 0 | 0 0 | 0 0 | 31.28 |
| PTHR14194-SF2  | 0 | 42 0 0  | 0 0 | 0 0 | 0 0 | 0 0 | 0 0 | 11.02 |
| PTHR14195      | 0 | 12 0 0  | 0 0 | 0 0 | 0 0 | 0 0 | 0 0 | 58.13 |
| PTHR14208      | 0 | 7 0 0   | 0 0 | 0 0 | 0 0 | 0 0 | 0 0 | 63.2  |
| PTHR14222      | 0 | 46 0 0  | 0 0 | 0 0 | 0 0 | 0 0 | 0 0 | 13.82 |
| PTHR14224      | 0 | 144 0 0 | 0 0 | 0 0 | 0 0 | 0 0 | 0 0 | 33.09 |
| PTHR14262      | 0 | 8 0 0   | 0 0 | 0 0 | 0 0 | 0 0 | 0 0 | 71.04 |
| PTHR14269-SF3  | 0 | 7 0 0   | 0 0 | 0 0 | 0 0 | 0 0 | 0 0 | 16.22 |
| PTHR14270      | 0 | 25 0 0  | 0 0 | 0 0 | 0 0 | 0 0 | 0 0 | 33.24 |
| PTHR14274-SF1  | 0 | 13 0 0  | 0 0 | 0 0 | 0 0 | 0 0 | 0 0 | 84.07 |
| PTHR14274-SF2  | 0 | 6 0 0   | 0 0 | 0 0 | 0 0 | 0 0 | 0 0 | 83.76 |
| PTHR14299      | 0 | 4 0 0   | 0 0 | 0 0 | 0 0 | 0 0 | 0 0 | 64.53 |
| PTHR14304-SF5  | 0 | 6 0 0   | 0 0 | 0 0 | 0 0 | 0 0 | 0 0 | 70.19 |
| PTHR14320      | 0 | 5 0 0   | 0 0 | 0 0 | 0 0 | 0 0 | 0 0 | 67.17 |
| PTHR14332      | 0 | 41 0 0  | 0 0 | 0 0 | 0 0 | 0 0 | 0 0 | 71.26 |
| PTHR14362      | 0 | 5 0 0   | 0 0 | 0 0 | 0 0 | 0 0 | 0 0 | 70.64 |
| PTHR14379      | 0 | 19 0 0  | 0 0 | 0 0 | 0 0 | 0 0 | 0 0 | 75.71 |
| PTHR14381      | 0 | 12 0 0  | 0 0 | 0 0 | 0 0 | 0 0 | 0 0 | 67.17 |
| PTHR14385      | 0 | 4 0 0   | 0 0 | 0 0 | 0 0 | 0 0 | 0 0 | 45.61 |
| PTHR14403-SF2  | 0 | 5 0 0   | 0 0 | 0 0 | 0 0 | 0 0 | 0 0 | 79.32 |
| PTHR14407-SF8  | 0 | 30 0 0  | 0 0 | 0 0 | 0 0 | 0 0 | 0 0 | 36.82 |
| PTHR14418      | 0 | 73 0 0  | 0 0 | 0 0 | 0 0 | 0 0 | 0 0 | 24.4  |
| PTHR14429-SF4  | 0 | 5 0 0   | 0 0 | 0 0 | 0 0 | 0 0 | 0 0 | 97.56 |
| PTHR14432-SF3  | 0 | 5 0 0   | 0 0 | 0 0 | 0 0 | 0 0 | 0 0 | 88.27 |
| PTHR14454      | 0 | 9 0 0   | 0 0 | 0 0 | 0 0 | 0 0 | 0 0 | 62.15 |
| PTHR14455      | 0 | 6 0 0   | 0 0 | 0 0 | 0 0 | 0 0 | 0 0 | 59.71 |
| PTHR14469      | 0 | 14 0 0  | 0 0 | 0 0 | 0 0 | 0 0 | 0 0 | 61.24 |
| PTHR14482      | 0 | 10 0 0  | 0 0 | 0 0 | 0 0 | 0 0 | 0 0 | 52.79 |
| PTHR14484      | 0 | 11 0 0  | 0 0 | 0 0 | 0 0 | 0 0 | 0 0 | 46.32 |
| PTHR14540      | 0 | 24 0 0  | 0 0 | 0 0 | 0 0 | 0 0 | 0 0 | 46.61 |
| PTHR14549      | 0 | 21 0 0  | 0 0 | 0 0 | 0 0 | 0 0 | 0 0 | 56.87 |
| PTHR14592-SF4  | 0 | 19 0 0  | 0 0 | 0 0 | 0 0 | 0 0 | 0 0 | 66.6  |
| PTHR14594      | 0 | 12 0 0  | 0 0 | 0 0 | 0 0 | 0 0 | 0 0 | 59.41 |
| PTHR14645      | 0 | 4 0 0   | 0 0 | 0 0 | 0 0 | 0 0 | 0 0 | 93.71 |
| PTHR14663      | 0 | 15 0 0  | 0 0 | 0 0 | 0 0 | 0 0 | 0 0 | 77.46 |
| PTHR14684      | 0 | 8 0 0   | 0 0 | 0 0 | 0 0 | 0 0 | 0 0 | 62.61 |
| PTHR14689      | 0 | 10 0 0  | 0 0 | 0 0 | 0 0 | 0 0 | 0 0 | 46.82 |
| PTHR14695-SF4  | 0 | 19 0 0  | 0 0 | 0 0 | 0 0 | 0 0 | 0 0 | 44.01 |
| PTHR14699      | 0 | 12 0 0  | 0 0 | 0 0 | 0 0 | 0 0 | 0 0 | 17.17 |
| PTHR14728      | 0 | 25 0 0  | 0 0 | 0 0 | 0 0 | 0 0 | 0 0 | 38.37 |
| PTHR14735      | 0 | 11 0 0  | 0 0 | 0 0 | 0 0 | 0 0 | 0 0 | 49.51 |
| PTHR14781      | 0 | 23 0 0  | 0 0 | 0 0 | 0 0 | 0 0 | 0 0 | 50.08 |
| PTHR14899      | 0 | 10 0 0  | 0 0 | 0 0 | 0 0 | 0 0 | 0 0 | 46.17 |
| PTHR14909-SF2  | 0 | 4 0 0   | 0 0 | 0 0 | 0 0 | 0 0 | 0 0 | 82.19 |
| PTHR14920      | 0 | 11 0 0  | 0 0 | 0 0 | 0 0 | 0 0 | 0 0 | 29.54 |
| PTHR14927      | 0 | 14 0 0  | 0 0 | 0 0 | 0 0 | 0 0 | 0 0 | 31.76 |
| PTHR14972-SF1  | 0 | 4 0 0   | 0 0 | 0 0 | 0 0 | 0 0 | 0 0 | 91.38 |
| PTHR14972-SF3  | 0 | 8 0 0   | 0 0 | 0 0 | 0 0 | 0 0 | 0 0 | 67.21 |
| PTHR14995      | 0 | 21 0 0  | 0 0 | 0 0 | 0 0 | 0 0 | 0 0 | 39.17 |
| PTHR15011-SF3  | 0 | 4 0 0   | 0 0 | 0 0 | 0 0 | 0 0 | 0 0 | 80.99 |
| PTHR15020      | 0 | 63 0 0  | 0 0 | 0 0 | 0 0 | 0 0 | 0 0 | 14.33 |
| PTHR15020-SF10 | 0 | 25 0 0  | 0 0 | 0 0 | 0 0 | 0 0 | 0 0 | 34.11 |
| PTHR15021      | 0 | 40 0 0  | 0 0 | 0 0 | 0 0 | 0 0 | 0 0 | 40.7  |
| PTHR15026      | 0 | 4 0 0   | 0 0 | 0 0 | 0 0 | 0 0 | 0 0 | 73.88 |
| PTHR15040      | 0 | 12 0 0  | 0 0 | 0 0 | 0 0 | 0 0 | 0 0 | 52.97 |
| PTHR15075      | 0 | 23 0 0  | 0 0 | 0 0 | 0 0 | 0 0 | 0 0 | 29.85 |
| PTHR15093      | 0 | 8 0 0   | 0 0 | 0 0 | 0 0 | 0 0 | 0 0 | 43.86 |
| PTHR15099      | 0 | 21 0 0  | 0 0 | 0 0 | 0 0 | 0 0 | 0 0 | 59.55 |
| PTHR15104      | 0 | 14 0 0  | 0 0 | 0 0 | 0 0 | 0 0 | 0 0 | 54.05 |
| PTHR15118      | 0 | 8 0 0   | 0 0 | 0 0 | 0 0 | 0 0 | 0 0 | 48.87 |
| PTHR15128      | 0 | 10 0 0  | 0 0 | 0 0 | 0 0 | 0 0 | 0 0 | 51.94 |
| PTHR15137-SF8  | 0 | 24 0 0  | 0 0 | 0 0 | 0 0 | 0 0 | 0 0 | 51.79 |
| PTHR15157-SF3  | 0 | 11 0 0  | 0 0 | 0 0 | 0 0 | 0 0 | 0 0 | 77.58 |
| PTHR15197      | 0 | 19 0 0  | 0 0 | 0 0 | 0 0 | 0 0 | 0 0 | 47.03 |
| PTHR15199      | 0 | 9 0 0   | 0 0 | 0 0 | 0 0 | 0 0 | 0 0 | 40.54 |
| PTHR15208      | 0 | 27 0 0  | 0 0 | 0 0 | 0 0 | 0 0 | 0 0 | 49.55 |
| PTHR15221      | 0 | 10 0 0  | 0 0 | 0 0 | 0 0 | 0 0 | 0 0 | 78.06 |
| PTHR15223      | 0 | 19 0 0  | 0 0 | 0 0 | 0 0 | 0 0 | 0 0 | 42.51 |
| PTHR15240      | 0 | 27 0 0  | 0 0 | 0 0 | 0 0 | 0 0 | 0 0 | 48.33 |
| PTHR15263      | 0 | 16 0 0  | 0 0 | 0 0 | 0 0 | 0 0 | 0 0 | 87.23 |
| PTHR15268-SF4  | 0 | 7 0 0   | 0 0 | 0 0 | 0 0 | 0 0 | 0 0 | 88.13 |
| PTHR15286-SF1  | 0 | 24 0 0  | 0 0 | 0 0 | 0 0 | 0 0 | 0 0 | 40.63 |
| PTHR15294      | 0 | 8 0 0   | 0 0 | 0 0 | 0 0 | 0 0 | 0 0 | 37.46 |
| PTHR15296      | 0 | 6 0 0   | 0 0 | 0 0 | 0 0 | 0 0 | 0 0 | 84.58 |
| PTHR15304      | 0 | 16 0 0  | 0 0 | 0 0 | 0 0 | 0 0 | 0 0 | 43.47 |
| PTHR15337-SF1  | 0 | 13 0 0  | 0 0 | 0 0 | 0 0 | 0 0 | 0 0 | 76.37 |
| PTHR15354      | 0 | 8 0 0   | 0 0 | 0 0 | 0 0 | 0 0 | 0 0 | 92.18 |
| PTHR15361-SF1  | 0 | 9 0 0   | 0 0 | 0 0 | 0 0 | 0 0 | 0 0 | 78.92 |
| PTHR15361-SF2  | 0 | 9 0 0   | 0 0 | 0 0 | 0 0 | 0 0 | 0 0 | 49.96 |
| PTHR15377      | 0 | 3 0 0   | 0 0 | 0 0 | 0 0 | 0 0 | 0 0 | 5.64  |
| PTHR15378      | 0 | 7 0 0   | 0 0 | 0 0 | 0 0 | 0 0 | 0 0 | 82.18 |
| PTHR15380      | 0 | 8 0 0   | 0 0 | 0 0 | 0 0 | 0 0 | 0 0 | 83.42 |
| PTHR15431-SF6  | 0 | 4 0 0   | 0 0 | 0 0 | 0 0 | 0 0 | 0 0 | 100   |
| PTHR15431-SF7  | 0 | 5 0 0   | 0 0 | 0 0 | 0 0 | 0 0 | 0 0 | 81.38 |
| PTHR15453      | 0 | 9 0 0   | 0 0 | 0 0 | 0 0 | 0 0 | 0 0 | 62.98 |
| PTHR15502-SF6  | 0 | 9 0 0   | 0 0 | 0 0 | 0 0 | 0 0 | 0 0 | 52.03 |
| PTHR15504      | 0 | 27 0 0  | 0 0 | 0 0 | 0 0 | 0 0 | 0 0 | 35.51 |
| PTHR15528-SF6  | 0 | 5 0 0   | 0 0 | 0 0 | 0 0 | 0 0 | 0 0 | 98.96 |
| PTHR15544      | 0 | 8 0 0   | 0 0 | 0 0 | 0 0 | 0 0 | 0 0 | 51.31 |
| PTHR15597-SF1  | 0 | 8 0 0   | 0 0 | 0 0 | 0 0 | 0 0 | 0 0 | 65.13 |
| PTHR15598      | 0 | 16 0 0  | 0 0 | 0 0 | 0 0 | 0 0 | 0 0 | 20.14 |
| PTHR15599      | 0 | 4 0 0   | 0 0 | 0 0 | 0 0 | 0 0 | 0 0 | 54.39 |
| PTHR15654      | 0 | 33 0 0  | 0 0 | 0 0 | 0 0 | 0 0 | 0 0 | 24.5  |
| PTHR15660      | 0 | 6 0 0   | 0 0 | 0 0 | 0 0 | 0 0 | 0 0 | 59.93 |
| PTHR15672-SF1  | 0 | 18 0 0  | 0 0 | 0 0 | 0 0 | 0 0 | 0 0 | 50.31 |
| PTHR15672-SF7  | 0 | 6 0 0   | 0 0 | 0 0 | 0 0 | 0 0 | 0 0 | 52.75 |
| PTHR15715-SF2  | 0 | 7 0 0   | 0 0 | 0 0 | 0 0 | 0 0 | 0 0 | 55.59 |
| PTHR15722-SF4  | 0 | 13 0 0  | 0 0 | 0 0 | 0 0 | 0 0 | 0 0 | 85.19 |
| PTHR15725      | 0 | 17 0 0  | 0 0 | 0 0 | 0 0 | 0 0 | 0 0 | 53.36 |
| PTHR15728      | 0 | 6 0 0   | 0 0 | 0 0 | 0 0 | 0 0 | 0 0 | 19.54 |
| PTHR15739-SF2  | 0 | 3 0 0   | 0 0 | 0 0 | 0 0 | 0 0 | 0 0 | 88.89 |
| PTHR15744      | 0 | 23 0 0  | 0 0 | 0 0 | 0 0 | 0 0 | 0 0 | 31.94 |
| PTHR15817      | 0 | 4 0 0   | 0 0 | 0 0 | 0 0 | 0 0 | 0 0 | 59.05 |
| PTHR15829-SF1  | 0 | 8 0 0   | 0 0 | 0 0 | 0 0 | 0 0 | 0 0 | 63.03 |
| PTHR15829-SF2  | 0 | 11 0 0  | 0 0 | 0 0 | 0 0 | 0 0 | 0 0 | 68    |
| PTHR15853      | 0 | 8 0 0   | 0 0 | 0 0 | 0 0 | 0 0 | 0 0 | 50.92 |
| PTHR15860      | 0 | 9 0 0   | 0 0 | 0 0 | 0 0 | 0 0 | 0 0 | 22.35 |
| PTHR15896-SF4  | 0 | 10 0 0  | 0 0 | 0 0 | 0 0 | 0 0 | 0 0 | 67.21 |
| PTHR15902-SF1  | 0 | 7 0 0   | 0 0 | 0 0 | 0 0 | 0 0 | 0 0 | 73.28 |
| PTHR15904-SF1  | 0 | 11 0 0  | 0 0 | 0 0 | 0 0 | 0 0 | 0 0 | 88.05 |
| PTHR15913      | 0 | 8 0 0   | 0 0 | 0 0 | 0 0 | 0 0 | 0 0 | 16.35 |

|                 |   |        |     |       |     |     |     |       |
|-----------------|---|--------|-----|-------|-----|-----|-----|-------|
| PTHR15919-SF5   | 0 | 8 0 0  | 0 0 | 0 0   | 0 0 | 0 0 | 0 0 | 85.06 |
| PTHR15953       | 0 | 5 0 0  | 0 0 | 0 0   | 0 0 | 0 0 | 0 0 | 62.4  |
| PTHR16038       | 0 | 8 0 0  | 0 0 | 0 0   | 0 0 | 0 0 | 0 0 | 26.23 |
| PTHR16046-SF4   | 0 | 7 0 0  | 0 0 | 0 0   | 0 0 | 0 0 | 0 0 | 89.53 |
| PTHR16057       | 0 | 18 0 0 | 0 0 | 0 0   | 0 0 | 0 0 | 0 0 | 44.66 |
| PTHR16070       | 0 | 12 0 0 | 0 0 | 0 0   | 0 0 | 0 0 | 0 0 | 55.03 |
| PTHR16076-SF4   | 0 | 10 0 0 | 0 0 | 0 0   | 0 0 | 0 0 | 0 0 | 61.84 |
| PTHR16088       | 0 | 36 0 0 | 0 0 | 0 0   | 0 0 | 0 0 | 0 0 | 35.74 |
| PTHR16095-SF8   | 0 | 4 0 0  | 0 0 | 0 0   | 0 0 | 0 0 | 0 0 | 68.34 |
| PTHR16166-SF26  | 0 | 7 0 0  | 0 0 | 0 0   | 0 0 | 0 0 | 0 0 | 14.87 |
| PTHR16208-SF4   | 0 | 9 0 0  | 0 0 | 0 0   | 0 0 | 0 0 | 0 0 | 66.1  |
| PTHR16220       | 0 | 11 0 0 | 0 0 | 0 0   | 0 0 | 0 0 | 0 0 | 21.12 |
| PTHR16230       | 0 | 26 0 0 | 0 0 | 0 0   | 0 0 | 0 0 | 0 0 | 35.26 |
| PTHR16244       | 0 | 9 0 0  | 0 0 | 0 0   | 0 0 | 0 0 | 0 0 | 83.06 |
| PTHR16266-SF2   | 0 | 3 0 0  | 0 0 | 0 0   | 0 0 | 0 0 | 0 0 | 99.12 |
| PTHR16267-SF1   | 0 | 18 0 0 | 0 0 | 0 0   | 0 0 | 0 0 | 0 0 | 67.05 |
| PTHR16276       | 0 | 30 0 0 | 0 0 | 0 0   | 0 0 | 0 0 | 0 0 | 43.05 |
| PTHR16284-SF1   | 0 | 11 0 0 | 0 0 | 0 0   | 0 0 | 0 0 | 0 0 | 80.5  |
| PTHR16284-SF3   | 0 | 14 0 0 | 0 0 | 0 0   | 0 0 | 0 0 | 0 0 | 51.13 |
| PTHR16317       | 0 | 8 0 0  | 0 0 | 0 0   | 0 0 | 0 0 | 0 0 | 58.59 |
| PTHR16434       | 0 | 5 0 0  | 0 0 | 0 0   | 0 0 | 0 0 | 0 0 | 40.88 |
| PTHR16453-SF9   | 0 | 24 0 0 | 0 0 | 0 0   | 0 0 | 0 0 | 0 0 | 39.89 |
| PTHR16502       | 0 | 10 0 0 | 0 0 | 0 0   | 0 0 | 0 0 | 0 0 | 72.26 |
| PTHR16524       | 0 | 7 0 0  | 0 0 | 0 0   | 0 0 | 0 0 | 0 0 | 62.05 |
| PTHR16703-SF1   | 0 | 8 0 0  | 0 0 | 0 0   | 0 0 | 0 0 | 0 0 | 96.42 |
| PTHR16742-SF2   | 0 | 4 0 0  | 0 0 | 0 0   | 0 0 | 0 0 | 0 0 | 39.62 |
| PTHR16757       | 0 | 5 0 0  | 0 0 | 0 0   | 0 0 | 0 0 | 0 0 | 79.4  |
| PTHR16779       | 0 | 29 0 0 | 0 0 | 0 0   | 0 0 | 0 0 | 0 0 | 58.52 |
| PTHR16797       | 0 | 24 0 0 | 0 0 | 0 0   | 0 0 | 0 0 | 0 0 | 38.59 |
| PTHR16836       | 0 | 42 0 0 | 0 0 | 0 0   | 0 0 | 0 0 | 0 0 | 28.68 |
| PTHR16886       | 0 | 5 0 0  | 0 0 | 0 0   | 0 0 | 0 0 | 0 0 | 76.52 |
| PTHR16915       | 0 | 13 0 0 | 0 0 | 0 0   | 0 0 | 0 0 | 0 0 | 69.6  |
| PTHR17097       | 0 | 9 0 0  | 0 0 | 0 0   | 0 0 | 0 0 | 0 0 | 73.18 |
| PTHR17204-SF6   | 0 | 4 0 0  | 0 0 | 0 0   | 0 0 | 0 0 | 0 0 | 49.04 |
| PTHR17206       | 0 | 7 0 0  | 0 0 | 0 0   | 0 0 | 0 0 | 0 0 | 64.87 |
| PTHR17314       | 0 | 6 0 0  | 0 0 | 0 0   | 0 0 | 0 0 | 0 0 | 56.56 |
| PTHR17384       | 0 | 20 0 0 | 0 0 | 0 0   | 0 0 | 0 0 | 0 0 | 32.72 |
| PTHR17388       | 0 | 11 0 0 | 0 0 | 0 0   | 0 0 | 0 0 | 0 0 | 79.13 |
| PTHR17469-SF8   | 0 | 14 0 0 | 0 0 | 0 0   | 0 0 | 0 0 | 0 0 | 76.37 |
| PTHR17554       | 0 | 13 0 0 | 0 0 | 0 0   | 0 0 | 0 0 | 0 0 | 70.54 |
| PTHR17571-SF6   | 0 | 4 0 0  | 0 0 | 0 0   | 0 0 | 0 0 | 0 0 | 62.7  |
| PTHR18207       | 0 | 22 0 0 | 0 0 | 0 0   | 0 0 | 0 0 | 0 0 | 37.61 |
| PTHR18640-SF3   | 0 | 8 0 0  | 0 0 | 0 0   | 0 0 | 0 0 | 0 0 | 32.16 |
| PTHR18849       | 0 | 42 0 0 | 0 0 | 0 0   | 0 0 | 0 0 | 0 0 | 44.45 |
| PTHR18864       | 0 | 11 0 0 | 0 0 | 0 0   | 0 0 | 0 0 | 0 0 | 74.07 |
| PTHR18867-SF11  | 0 | 12 0 0 | 0 0 | 0 0   | 0 0 | 0 0 | 0 0 | 31.16 |
| PTHR18895-SF8   | 0 | 17 0 0 | 0 0 | 0 0   | 0 0 | 0 0 | 0 0 | 33.95 |
| PTHR18911       | 0 | 22 0 0 | 0 0 | 0 0   | 0 0 | 0 0 | 0 0 | 49.14 |
| PTHR18950       | 0 | 12 0 0 | 0 0 | 0 0   | 0 0 | 0 0 | 0 0 | 71.36 |
| PTHR18958-SF138 | 0 | 10 0 0 | 0 0 | 0 0   | 0 0 | 0 0 | 0 0 | 63.38 |
| PTHR18964-SF13  | 0 | 4 0 0  | 0 0 | 0 0   | 0 0 | 0 0 | 0 0 | 67.34 |
| PTHR18964-SF22  | 0 | 3 0 0  | 0 0 | 0 0   | 0 0 | 0 0 | 0 0 | 96.07 |
| PTHR18973-SF10  | 0 | 11 0 0 | 0 0 | 0 0   | 0 0 | 0 0 | 0 0 | 79.16 |
| PTHR18978       | 0 | 14 0 0 | 0 0 | 0 0   | 0 0 | 0 0 | 0 0 | 55.54 |
| PTHR19134-SF29  | 0 | 4 0 0  | 0 0 | 0 0   | 0 0 | 0 0 | 0 0 | 39.56 |
| PTHR19211-SF11  | 0 | 6 0 0  | 0 0 | 0 0   | 0 0 | 0 0 | 0 0 | 24.56 |
| PTHR19211-SF7   | 0 | 16 0 0 | 0 0 | 0 0   | 0 0 | 0 0 | 0 0 | 24.15 |
| PTHR19222-SF28  | 0 | 10 0 0 | 0 0 | 0 0   | 0 0 | 0 0 | 0 0 | 22.39 |
| PTHR19222-SF31  | 0 | 17 0 0 | 0 0 | 0 0   | 0 0 | 0 0 | 0 0 | 32.43 |
| PTHR19222-SF32  | 0 | 14 0 0 | 0 0 | 0 0   | 0 0 | 0 0 | 0 0 | 19.67 |
| PTHR19229       | 0 | 16 0 0 | 0 0 | 0 0   | 0 0 | 0 0 | 0 0 | 5.48  |
| PTHR19232-SF1   | 0 | 9 0 0  | 0 0 | 0 0   | 0 0 | 0 0 | 0 0 | 67.1  |
| PTHR19232-SF2   | 0 | 14 0 0 | 0 0 | 0 0   | 0 0 | 0 0 | 0 0 | 62.79 |
| PTHR19237       | 0 | 8 0 0  | 0 0 | 0 0   | 0 0 | 0 0 | 0 0 | 44.21 |
| PTHR19237-SF4   | 0 | 9 0 0  | 0 0 | 0 0   | 0 0 | 0 0 | 0 0 | 92.19 |
| PTHR19240       | 0 | 13 0 0 | 0 0 | 0 0   | 0 0 | 0 0 | 0 0 | 76.77 |
| PTHR19241-SF20  | 0 | 14 0 0 | 0 0 | 0 0   | 0 0 | 0 0 | 0 0 | 26.08 |
| PTHR19242-SF53  | 0 | 4 0 0  | 0 0 | 0 0   | 0 0 | 0 0 | 0 0 | 44.94 |
| PTHR19242-SF91  | 0 | 9 0 0  | 0 0 | 0 0   | 0 0 | 0 0 | 0 0 | 20.81 |
| PTHR19242-SF96  | 0 | 26 0 0 | 0 0 | 0 0   | 0 0 | 0 0 | 0 0 | 9.09  |
| PTHR19269-SF3   | 0 | 22 0 0 | 0 0 | 0 0   | 0 0 | 0 0 | 0 0 | 56.13 |
| PTHR19288-SF1   | 0 | 4 0 0  | 0 0 | 0 0   | 0 0 | 0 0 | 0 0 | 36.02 |
| PTHR19288-SF11  | 0 | 13 0 0 | 0 0 | 0 0   | 0 0 | 0 0 | 0 0 | 38.79 |
| PTHR19288-SF3   | 0 | 34 0 0 | 0 0 | 0 0   | 0 0 | 0 0 | 0 0 | 29.09 |
| PTHR19288-SF4   | 0 | 25 0 0 | 0 0 | 0 0   | 0 0 | 0 0 | 0 0 | 53.12 |
| PTHR19288-SF6   | 0 | 7 0 0  | 0 0 | 0 0   | 0 0 | 0 0 | 0 0 | 41.86 |
| PTHR19306-SF1   | 0 | 12 0 0 | 0 0 | 0 0   | 0 0 | 0 0 | 0 0 | 12.18 |
| PTHR19308       | 0 | 40 0 0 | 0 0 | 0 0   | 0 0 | 0 0 | 0 0 | 47.63 |
| PTHR19316-SF1   | 0 | 22 0 0 | 0 0 | 0 0   | 0 0 | 0 0 | 0 0 | 32.27 |
| PTHR19316-SF3   | 0 | 9 0 0  | 0 0 | 0 0   | 0 0 | 0 0 | 0 0 | 30.39 |
| PTHR19378       | 0 | 18 0 0 | 0 0 | 0 0   | 0 0 | 0 0 | 0 0 | 37.41 |
| PTHR19410-SF116 | 0 | 7 0 0  | 0 0 | 0 0   | 0 0 | 0 0 | 0 0 | 25.58 |
| PTHR19410-SF19  | 0 | 16 0 0 | 0 0 | 0 0   | 0 0 | 0 0 | 0 0 | 35.05 |
| PTHR19410-SF53  | 0 | 9 0 0  | 0 0 | 0 0   | 0 0 | 0 0 | 0 0 | 20.4  |
| PTHR19410-SF62  | 0 | 18 0 0 | 0 0 | 0 0   | 0 0 | 0 0 | 0 0 | 16.1  |
| PTHR19410-SF85  | 0 | 38 0 0 | 0 0 | 0 0   | 0 0 | 0 0 | 0 0 | 21.37 |
| PTHR19432-SF2   | 0 | 32 0 0 | 0 0 | 0 0   | 0 0 | 0 0 | 0 0 | 38.96 |
| PTHR19444-SF11  | 0 | 18 0 0 | 0 0 | 0 0   | 0 0 | 0 0 | 0 0 | 73.95 |
| PTHR19446-SF98  | 0 | 23 0 0 | 0 0 | 0 0   | 0 0 | 0 0 | 0 0 | 13    |
| PTHR19919       | 0 | 6 0 0  | 0 0 | 0 0   | 0 0 | 0 0 | 0 0 | 36.86 |
| PTHR20846       | 0 | 11 0 0 | 0 0 | 0 0   | 0 0 | 0 0 | 0 0 | 71.43 |
| PTHR20863       | 0 | 22 0 0 | 0 0 | 0 0   | 0 0 | 0 0 | 0 0 | 23.81 |
| PTHR20864       | 0 | 15 0 0 | 0 0 | 0 0   | 0 0 | 0 0 | 0 0 | 42.48 |
| PTHR20867       | 0 | 9 0 0  | 0 0 | 0 0   | 0 0 | 0 0 | 0 0 | 67.94 |
| PTHR20875       | 0 | 16 0 0 | 0 0 | 0 0   | 0 0 | 0 0 | 0 0 | 61.31 |
| PTHR20877       | 0 | 13 0 0 | 0 0 | 0 0   | 0 0 | 0 0 | 0 0 | 73.91 |
| PTHR20878       | 0 | 5 0 0  | 0 0 | 0 0   | 0 0 | 0 0 | 0 0 | 59.24 |
| PTHR20879       | 0 | 4 0 0  | 0 0 | 0 0   | 0 0 | 0 0 | 0 0 | 69.68 |
| PTHR20884-SF2   | 0 | 16 0 0 | 0 0 | 0 0   | 0 0 | 0 0 | 0 0 | 63.96 |
| PTHR20884-SF3   | 0 | 30 0 0 | 0 0 | 0 0   | 0 0 | 0 0 | 0 0 | 51.83 |
| PTHR20884-SF4   | 0 | 9 0 0  | 0 0 | 0 0   | 0 0 | 0 0 | 0 0 | 44.74 |
| PTHR20892       | 0 | 8 0 0  | 0 0 | 0 0   | 0 0 | 0 0 | 0 0 | 68.5  |
| PTHR20898       | 0 | 20 0 0 | 0 0 | 0 0   | 0 0 | 0 0 | 0 0 | 20.45 |
| PTHR20904       | 0 | 12 0 0 | 0 0 | 0 0   | 0 0 | 0 0 | 0 0 | 67.63 |
| PTHR20905       | 0 | 58 0 0 | 0 0 | 0 0   | 0 0 | 0 0 | 0 0 | 18.75 |
| PTHR20906       | 0 | 8 0 0  | 0 0 | 0 0   | 0 0 | 0 0 | 0 0 | 63.1  |
| PTHR20907       | 0 | 26 0 0 | 0 0 | 0 0   | 0 0 | 0 0 | 0 0 | 54.45 |
| PTHR20909       | 0 | 29 0 0 | 0 0 | 0 0   | 0 0 | 0 0 | 0 0 | 26.99 |
| PTHR20915       | 0 | 23 0 0 | 0 0 | 0 0   | 0 0 | 0 0 | 0 0 | 57.41 |
| PTHR20926       | 0 | 17 0 0 | 0 0 | 0 0   | 0 0 | 0 0 | 0 0 | 83.79 |
| PTHR20927       | 0 | 13 0 0 | 0 0 | 0 0   | 0 0 | 0 0 | 0 0 | 65.71 |
| PTHR20931       | 0 | 21 0 0 | 0 0 | 0 0   | 0 0 | 0 0 | 0 0 | 62.79 |
| PTHR20933       | 0 | 5 0 0  | 0 0 | 0 0   | 0 0 | 0 0 | 0 0 | 32.58 |
| PTHR20945       | 0 | 14 0 0 | 0 0 | 0 0   | 0 0 | 0 0 | 0 0 | 70.74 |
| PTHR20947       | 0 | 5 0 0  | 0 0 | 0 0   | 0 0 | 0 0 | 0 0 | 52.08 |
| PTHR20947-SF1   | 0 | 14 0 0 | 0 0 | 0 0   | 0 0 | 0 0 | 0 0 | 61.79 |
| PTHR20947-SF2   | 0 | 10 0 0 | 0 0 | 0 0   | 0 0 | 0 0 | 0 0 | 62.97 |
| PTHR20948       | 0 | 32 0 0 | 0 0 | 0 0   | 0 0 | 0 0 | 0 0 | 49.76 |
| PTHR20960       | 0 | 13 0 0 | 0 0 | 0 0   | 0 0 | 0 0 | 0 0 | 66.45 |
| PTHR20970       | 0 | 14 0 0 | 0 0 | 0 0   | 0 0 | 0 0 | 0 0 | 63.47 |
| PTHR20979       | 0 | 6 0 0  | 0 0 | 0 0   | 0 0 | 0 0 | 0 0 | 86.27 |
| PTHR20980       | 0 | 24 0 0 | 0 0 | 0 0   | 0 0 | 0 0 | 0 0 | 43.7  |
| PTHR20983       | 0 | 18 0 0 | 0 0 | 0 0   | 0 0 | 0 0 | 0 0 | 55.47 |
| PTHR20987       | 0 | 89 0 0 | 0 0 | 0 0   | 0 0 | 0 0 | 0 0 | 32.14 |
| PTHR20988       | 0 | 23 0 0 | 0 0 | 0 0   | 0 0 | 0 0 | 0 0 | 40.63 |
| PTHR20991       | 0 | 26 0 0 | 0 0 | 0 0   | 0 0 | 0 0 | 0 0 | 37.57 |
| PTHR20999       | 0 | 13 0 0 | 0 0 | 0 0   | 0 0 | 0 0 | 0 0 | 58.97 |
| PTHR21008       | 0 | 9 0 0  | 0 0 | 0 0   | 0 0 | 0 0 | 0 0 | 39.92 |
| PTHR21009       | 0 | 61 0 0 | 0 0 | 0 0   | 0 0 | 0 0 | 0 0 | 27.06 |
| PTHR21019       | 0 | 12 0 0 | 0 0 | 0 0   | 0 0 | 0 0 | 0 0 | 71    |
| PTHR21021-SF15  | 0 | 62 0 0 | 0 0 | 0 0   | 0 0 | 0 0 | 0 0 | 46.35 |
| PTHR21027       | 0 | 25 0 0 | 0 0 | 0 0   | 0 0 | 0 0 | 0 0 | 26.09 |
| PTHR21029-SF1   | 0 | 8 0 0  | 0 0 | 0 0   | 0 0 | 0 0 | 0 0 | 45.33 |
| PTHR21031       | 0 | 19 0 0 | 0 0 | 0 0   | 0 0 | 0 0 | 0 0 | 42.68 |
| PTHR21036       | 0 | 16 0 0 | 0 0 | 0 0   | 0 0 | 0 0 | 0 0 | 61.16 |
| PTHR21041       | 0 | 4 0 0  | 0 0 | 0 0   | 0 0 | 0 0 | 0 0 | 22.78 |
| PTHR21048       | 0 | 21 0 0 | 0 0 | 0 0   | 0 0 | 0 0 | 0 0 | 51.92 |
| PTHR21052       | 0 | 31 0 0 | 0 0 | 0 0   | 0 0 | 0 0 | 0 0 | 52.19 |
| PTHR21053       | 0 | 22 0 0 | 0 0 | 0 0   | 0 0 | 0 0 | 0 0 | 35.77 |
| PTHR21055       | 0 | 37 0 0 | 0 0 | 0 0   | 0 0 | 0 0 | 0 0 | 64.53 |
| PTHR21065       | 0 | 15 0 0 | 0 0 | 0 0   | 0 0 | 0 0 | 0 0 | 61.45 |
| PTHR21074       | 0 | 25 0 0 | 0 0 | 0 0   | 0 0 | 0 0 | 0 0 | 42.87 |
| PTHR21076       | 0 | 7 0 0  | 0 0 | 0 0   | 0 0 | 0 0 | 0 0 | 39.94 |
| PTHR21078       | 0 | 60 0 0 | 0 0 | 0 0   | 0 0 | 0 0 | 0 0 | 34.53 |
| PTHR21080       | 0 | 15 0 0 | 0 0 | 0 0   | 0 0 | 0 0 | 0 0 | 66.8  |
| PTHR21082-SF1   | 0 | 13 0 0 | 0 0 | 0 0   | 0 0 | 0 0 | 0 0 | 70.46 |
| PTHR21084       | 0 | 23 0 0 | 0 0 | 0 0</ |     |     |     |       |

|                |   |         |     |     |     |     |     |       |
|----------------|---|---------|-----|-----|-----|-----|-----|-------|
| PTHR21091.SF4  | 0 | 3 0 0   | 0 0 | 0 0 | 0 0 | 0 0 | 0 0 | 46.42 |
| PTHR21094      | 0 | 7 0 0   | 0 0 | 0 0 | 0 0 | 0 0 | 0 0 | 20.05 |
| PTHR21095      | 0 | 47 0 0  | 0 0 | 0 0 | 0 0 | 0 0 | 0 0 | 24.9  |
| PTHR21097      | 0 | 14 0 0  | 0 0 | 0 0 | 0 0 | 0 0 | 0 0 | 80.7  |
| PTHR21102      | 0 | 12 0 0  | 0 0 | 0 0 | 0 0 | 0 0 | 0 0 | 86.88 |
| PTHR21108      | 0 | 17 0 0  | 0 0 | 0 0 | 0 0 | 0 0 | 0 0 | 72.16 |
| PTHR21111      | 0 | 4 0 0   | 0 0 | 0 0 | 0 0 | 0 0 | 0 0 | 63.86 |
| PTHR21114      | 0 | 8 0 0   | 0 0 | 0 0 | 0 0 | 0 0 | 0 0 | 71.99 |
| PTHR21115      | 0 | 44 0 0  | 0 0 | 0 0 | 0 0 | 0 0 | 0 0 | 38.71 |
| PTHR21124      | 0 | 23 0 0  | 0 0 | 0 0 | 0 0 | 0 0 | 0 0 | 44.57 |
| PTHR21125      | 0 | 37 0 0  | 0 0 | 0 0 | 0 0 | 0 0 | 0 0 | 35.76 |
| PTHR21130      | 0 | 12 0 0  | 0 0 | 0 0 | 0 0 | 0 0 | 0 0 | 46.08 |
| PTHR21132      | 0 | 15 0 0  | 0 0 | 0 0 | 0 0 | 0 0 | 0 0 | 79    |
| PTHR21134      | 0 | 17 0 0  | 0 0 | 0 0 | 0 0 | 0 0 | 0 0 | 51.95 |
| PTHR21136.SF1  | 0 | 7 0 0   | 0 0 | 0 0 | 0 0 | 0 0 | 0 0 | 87.29 |
| PTHR21136.SF2  | 0 | 4 0 0   | 0 0 | 0 0 | 0 0 | 0 0 | 0 0 | 68.38 |
| PTHR21147      | 0 | 17 0 0  | 0 0 | 0 0 | 0 0 | 0 0 | 0 0 | 64.44 |
| PTHR21148      | 0 | 13 0 0  | 0 0 | 0 0 | 0 0 | 0 0 | 0 0 | 32.41 |
| PTHR21148.SF1  | 0 | 5 0 0   | 0 0 | 0 0 | 0 0 | 0 0 | 0 0 | 42.21 |
| PTHR21152.SF1  | 0 | 17 0 0  | 0 0 | 0 0 | 0 0 | 0 0 | 0 0 | 60.28 |
| PTHR21156      | 0 | 14 0 0  | 0 0 | 0 0 | 0 0 | 0 0 | 0 0 | 67.77 |
| PTHR21157      | 0 | 14 0 0  | 0 0 | 0 0 | 0 0 | 0 0 | 0 0 | 69.95 |
| PTHR21159      | 0 | 15 0 0  | 0 0 | 0 0 | 0 0 | 0 0 | 0 0 | 70.43 |
| PTHR21173      | 0 | 9 0 0   | 0 0 | 0 0 | 0 0 | 0 0 | 0 0 | 87.63 |
| PTHR21175      | 0 | 15 0 0  | 0 0 | 0 0 | 0 0 | 0 0 | 0 0 | 81.79 |
| PTHR21178.SF1  | 0 | 3 0 0   | 0 0 | 0 0 | 0 0 | 0 0 | 0 0 | 58.11 |
| PTHR21178.SF2  | 0 | 10 0 0  | 0 0 | 0 0 | 0 0 | 0 0 | 0 0 | 54.21 |
| PTHR21186      | 0 | 12 0 0  | 0 0 | 0 0 | 0 0 | 0 0 | 0 0 | 70.2  |
| PTHR21195      | 0 | 26 0 0  | 0 0 | 0 0 | 0 0 | 0 0 | 0 0 | 37.08 |
| PTHR21198      | 0 | 4 0 0   | 0 0 | 0 0 | 0 0 | 0 0 | 0 0 | 55.28 |
| PTHR21202      | 0 | 12 0 0  | 0 0 | 0 0 | 0 0 | 0 0 | 0 0 | 69.64 |
| PTHR21203      | 0 | 15 0 0  | 0 0 | 0 0 | 0 0 | 0 0 | 0 0 | 65.92 |
| PTHR21215      | 0 | 16 0 0  | 0 0 | 0 0 | 0 0 | 0 0 | 0 0 | 77.61 |
| PTHR21217      | 0 | 24 0 0  | 0 0 | 0 0 | 0 0 | 0 0 | 0 0 | 55.59 |
| PTHR21218      | 0 | 18 0 0  | 0 0 | 0 0 | 0 0 | 0 0 | 0 0 | 42.23 |
| PTHR21219.SF2  | 0 | 19 0 0  | 0 0 | 0 0 | 0 0 | 0 0 | 0 0 | 79.43 |
| PTHR21232      | 0 | 6 0 0   | 0 0 | 0 0 | 0 0 | 0 0 | 0 0 | 76.49 |
| PTHR21244      | 0 | 27 0 0  | 0 0 | 0 0 | 0 0 | 0 0 | 0 0 | 58.22 |
| PTHR21249.SF1  | 0 | 13 0 0  | 0 0 | 0 0 | 0 0 | 0 0 | 0 0 | 49.81 |
| PTHR21249.SF2  | 0 | 21 0 0  | 0 0 | 0 0 | 0 0 | 0 0 | 0 0 | 50.21 |
| PTHR21260      | 0 | 14 0 0  | 0 0 | 0 0 | 0 0 | 0 0 | 0 0 | 55.9  |
| PTHR21264      | 0 | 17 0 0  | 0 0 | 0 0 | 0 0 | 0 0 | 0 0 | 64.92 |
| PTHR21271      | 0 | 16 0 0  | 0 0 | 0 0 | 0 0 | 0 0 | 0 0 | 55.92 |
| PTHR21276      | 0 | 6 0 0   | 0 0 | 0 0 | 0 0 | 0 0 | 0 0 | 42.33 |
| PTHR21277.SF1  | 0 | 8 0 0   | 0 0 | 0 0 | 0 0 | 0 0 | 0 0 | 61.78 |
| PTHR21277.SF3  | 0 | 13 0 0  | 0 0 | 0 0 | 0 0 | 0 0 | 0 0 | 88.51 |
| PTHR21283      | 0 | 21 0 0  | 0 0 | 0 0 | 0 0 | 0 0 | 0 0 | 42.71 |
| PTHR21284.SF1  | 0 | 17 0 0  | 0 0 | 0 0 | 0 0 | 0 0 | 0 0 | 80.56 |
| PTHR21284.SF2  | 0 | 18 0 0  | 0 0 | 0 0 | 0 0 | 0 0 | 0 0 | 85.64 |
| PTHR21290.SF1  | 0 | 24 0 0  | 0 0 | 0 0 | 0 0 | 0 0 | 0 0 | 67.38 |
| PTHR21296      | 0 | 11 0 0  | 0 0 | 0 0 | 0 0 | 0 0 | 0 0 | 76.84 |
| PTHR21306      | 0 | 14 0 0  | 0 0 | 0 0 | 0 0 | 0 0 | 0 0 | 69.78 |
| PTHR21321.SF1  | 0 | 77 0 0  | 0 0 | 0 0 | 0 0 | 0 0 | 0 0 | 39.82 |
| PTHR21321.SF2  | 0 | 71 0 0  | 0 0 | 0 0 | 0 0 | 0 0 | 0 0 | 48.91 |
| PTHR21326      | 0 | 29 0 0  | 0 0 | 0 0 | 0 0 | 0 0 | 0 0 | 63.65 |
| PTHR21331      | 0 | 14 0 0  | 0 0 | 0 0 | 0 0 | 0 0 | 0 0 | 72.78 |
| PTHR21332      | 0 | 14 0 0  | 0 0 | 0 0 | 0 0 | 0 0 | 0 0 | 67.53 |
| PTHR21335      | 0 | 14 0 0  | 0 0 | 0 0 | 0 0 | 0 0 | 0 0 | 58.96 |
| PTHR21343      | 0 | 19 0 0  | 0 0 | 0 0 | 0 0 | 0 0 | 0 0 | 20.96 |
| PTHR21345      | 0 | 12 0 0  | 0 0 | 0 0 | 0 0 | 0 0 | 0 0 | 30.21 |
| PTHR21352      | 0 | 15 0 0  | 0 0 | 0 0 | 0 0 | 0 0 | 0 0 | 69.75 |
| PTHR21354      | 0 | 44 0 0  | 0 0 | 0 0 | 0 0 | 0 0 | 0 0 | 40.08 |
| PTHR21358.SF1  | 0 | 21 0 0  | 0 0 | 0 0 | 0 0 | 0 0 | 0 0 | 53.94 |
| PTHR21359      | 0 | 18 0 0  | 0 0 | 0 0 | 0 0 | 0 0 | 0 0 | 49.54 |
| PTHR21366      | 0 | 80 0 0  | 0 0 | 0 0 | 0 0 | 0 0 | 0 0 | 18.25 |
| PTHR21370      | 0 | 12 0 0  | 0 0 | 0 0 | 0 0 | 0 0 | 0 0 | 67.8  |
| PTHR21380      | 0 | 15 0 0  | 0 0 | 0 0 | 0 0 | 0 0 | 0 0 | 42.82 |
| PTHR21394      | 0 | 11 0 0  | 0 0 | 0 0 | 0 0 | 0 0 | 0 0 | 48.26 |
| PTHR21397      | 0 | 34 0 0  | 0 0 | 0 0 | 0 0 | 0 0 | 0 0 | 44.44 |
| PTHR21401      | 0 | 13 0 0  | 0 0 | 0 0 | 0 0 | 0 0 | 0 0 | 57.18 |
| PTHR21407.SF2  | 0 | 11 0 0  | 0 0 | 0 0 | 0 0 | 0 0 | 0 0 | 96.82 |
| PTHR21411      | 0 | 30 0 0  | 0 0 | 0 0 | 0 0 | 0 0 | 0 0 | 51.3  |
| PTHR21416      | 0 | 5 0 0   | 0 0 | 0 0 | 0 0 | 0 0 | 0 0 | 83.63 |
| PTHR21419.SF10 | 0 | 5 0 0   | 0 0 | 0 0 | 0 0 | 0 0 | 0 0 | 77.75 |
| PTHR21419.SF7  | 0 | 4 0 0   | 0 0 | 0 0 | 0 0 | 0 0 | 0 0 | 75.53 |
| PTHR21422.SF5  | 0 | 13 0 0  | 0 0 | 0 0 | 0 0 | 0 0 | 0 0 | 56.5  |
| PTHR21422.SF7  | 0 | 18 0 0  | 0 0 | 0 0 | 0 0 | 0 0 | 0 0 | 70.07 |
| PTHR21423      | 0 | 8 0 0   | 0 0 | 0 0 | 0 0 | 0 0 | 0 0 | 78.7  |
| PTHR21426.SF2  | 0 | 10 0 0  | 0 0 | 0 0 | 0 0 | 0 0 | 0 0 | 58.96 |
| PTHR21444.SF5  | 0 | 13 0 0  | 0 0 | 0 0 | 0 0 | 0 0 | 0 0 | 78.85 |
| PTHR21446.SF2  | 0 | 7 0 0   | 0 0 | 0 0 | 0 0 | 0 0 | 0 0 | 67.49 |
| PTHR21468      | 0 | 6 0 0   | 0 0 | 0 0 | 0 0 | 0 0 | 0 0 | 46.83 |
| PTHR21475      | 0 | 10 0 0  | 0 0 | 0 0 | 0 0 | 0 0 | 0 0 | 60.39 |
| PTHR21486      | 0 | 8 0 0   | 0 0 | 0 0 | 0 0 | 0 0 | 0 0 | 85.24 |
| PTHR21490      | 0 | 35 0 0  | 0 0 | 0 0 | 0 0 | 0 0 | 0 0 | 29.72 |
| PTHR21497.SF6  | 0 | 12 0 0  | 0 0 | 0 0 | 0 0 | 0 0 | 0 0 | 17    |
| PTHR21502      | 0 | 33 0 0  | 0 0 | 0 0 | 0 0 | 0 0 | 0 0 | 27.79 |
| PTHR21512.SF8  | 0 | 15 0 0  | 0 0 | 0 0 | 0 0 | 0 0 | 0 0 | 71.65 |
| PTHR21517      | 0 | 14 0 0  | 0 0 | 0 0 | 0 0 | 0 0 | 0 0 | 57.37 |
| PTHR21521      | 0 | 48 0 0  | 0 0 | 0 0 | 0 0 | 0 0 | 0 0 | 39.42 |
| PTHR21526      | 0 | 13 0 0  | 0 0 | 0 0 | 0 0 | 0 0 | 0 0 | 56.28 |
| PTHR21529      | 0 | 40 0 0  | 0 0 | 0 0 | 0 0 | 0 0 | 0 0 | 35.45 |
| PTHR21533.SF13 | 0 | 11 0 0  | 0 0 | 0 0 | 0 0 | 0 0 | 0 0 | 32.04 |
| PTHR21544      | 0 | 8 0 0   | 0 0 | 0 0 | 0 0 | 0 0 | 0 0 | 51.35 |
| PTHR21552      | 0 | 23 0 0  | 0 0 | 0 0 | 0 0 | 0 0 | 0 0 | 47.57 |
| PTHR21554      | 0 | 8 0 0   | 0 0 | 0 0 | 0 0 | 0 0 | 0 0 | 76.13 |
| PTHR21555      | 0 | 4 0 0   | 0 0 | 0 0 | 0 0 | 0 0 | 0 0 | 56.77 |
| PTHR21558.SF1  | 0 | 45 0 0  | 0 0 | 0 0 | 0 0 | 0 0 | 0 0 | 48.07 |
| PTHR21565      | 0 | 11 0 0  | 0 0 | 0 0 | 0 0 | 0 0 | 0 0 | 51.04 |
| PTHR21570      | 0 | 10 0 0  | 0 0 | 0 0 | 0 0 | 0 0 | 0 0 | 78.06 |
| PTHR21573      | 0 | 4 0 0   | 0 0 | 0 0 | 0 0 | 0 0 | 0 0 | 27.79 |
| PTHR21581      | 0 | 26 0 0  | 0 0 | 0 0 | 0 0 | 0 0 | 0 0 | 36.63 |
| PTHR21583.SF1  | 0 | 10 0 0  | 0 0 | 0 0 | 0 0 | 0 0 | 0 0 | 51.75 |
| PTHR21584.SF1  | 0 | 6 0 0   | 0 0 | 0 0 | 0 0 | 0 0 | 0 0 | 79.31 |
| PTHR21584.SF7  | 0 | 11 0 0  | 0 0 | 0 0 | 0 0 | 0 0 | 0 0 | 40.46 |
| PTHR21585      | 0 | 8 0 0   | 0 0 | 0 0 | 0 0 | 0 0 | 0 0 | 80.57 |
| PTHR21586      | 0 | 16 0 0  | 0 0 | 0 0 | 0 0 | 0 0 | 0 0 | 76.07 |
| PTHR21588      | 0 | 29 0 0  | 0 0 | 0 0 | 0 0 | 0 0 | 0 0 | 36.57 |
| PTHR21589      | 0 | 11 0 0  | 0 0 | 0 0 | 0 0 | 0 0 | 0 0 | 75.84 |
| PTHR21596.SF1  | 0 | 9 0 0   | 0 0 | 0 0 | 0 0 | 0 0 | 0 0 | 51.97 |
| PTHR21602      | 0 | 14 0 0  | 0 0 | 0 0 | 0 0 | 0 0 | 0 0 | 62.5  |
| PTHR21605      | 0 | 11 0 0  | 0 0 | 0 0 | 0 0 | 0 0 | 0 0 | 70.41 |
| PTHR21613      | 0 | 19 0 0  | 0 0 | 0 0 | 0 0 | 0 0 | 0 0 | 38.42 |
| PTHR21617      | 0 | 9 0 0   | 0 0 | 0 0 | 0 0 | 0 0 | 0 0 | 39.75 |
| PTHR21631.SF4  | 0 | 130 0 0 | 0 0 | 0 0 | 0 0 | 0 0 | 0 0 | 29.83 |
| PTHR21632      | 0 | 8 0 0   | 0 0 | 0 0 | 0 0 | 0 0 | 0 0 | 43.71 |
| PTHR21635      | 0 | 10 0 0  | 0 0 | 0 0 | 0 0 | 0 0 | 0 0 | 67.26 |
| PTHR21642.SF1  | 0 | 12 0 0  | 0 0 | 0 0 | 0 0 | 0 0 | 0 0 | 66.31 |
| PTHR21651      | 0 | 5 0 0   | 0 0 | 0 0 | 0 0 | 0 0 | 0 0 | 90.27 |
| PTHR21655      | 0 | 12 0 0  | 0 0 | 0 0 | 0 0 | 0 0 | 0 0 | 31.68 |
| PTHR21656      | 0 | 52 0 0  | 0 0 | 0 0 | 0 0 | 0 0 | 0 0 | 34.82 |
| PTHR21665      | 0 | 5 0 0   | 0 0 | 0 0 | 0 0 | 0 0 | 0 0 | 46.36 |
| PTHR21667      | 0 | 15 0 0  | 0 0 | 0 0 | 0 0 | 0 0 | 0 0 | 78.57 |
| PTHR21669      | 0 | 15 0 0  | 0 0 | 0 0 | 0 0 | 0 0 | 0 0 | 85.03 |
| PTHR21669.SF2  | 0 | 8 0 0   | 0 0 | 0 0 | 0 0 | 0 0 | 0 0 | 32.36 |
| PTHR21672      | 0 | 13 0 0  | 0 0 | 0 0 | 0 0 | 0 0 | 0 0 | 60.89 |
| PTHR21673      | 0 | 15 0 0  | 0 0 | 0 0 | 0 0 | 0 0 | 0 0 | 81.96 |
| PTHR21674      | 0 | 18 0 0  | 0 0 | 0 0 | 0 0 | 0 0 | 0 0 | 55.03 |
| PTHR21676      | 0 | 21 0 0  | 0 0 | 0 0 | 0 0 | 0 0 | 0 0 | 42.69 |
| PTHR21683      | 0 | 51 0 0  | 0 0 | 0 0 | 0 0 | 0 0 | 0 0 | 23.53 |
| PTHR21684      | 0 | 17 0 0  | 0 0 | 0 0 | 0 0 | 0 0 | 0 0 | 66.29 |
| PTHR21685      | 0 | 18 0 0  | 0 0 | 0 0 | 0 0 | 0 0 | 0 0 | 48.73 |
| PTHR21692      | 0 | 21 0 0  | 0 0 | 0 0 | 0 0 | 0 0 | 0 0 | 55.45 |
| PTHR21694.SF2  | 0 | 70 0 0  | 0 0 | 0 0 | 0 0 | 0 0 | 0 0 | 17.98 |
| PTHR21696      | 0 | 32 0 0  | 0 0 | 0 0 | 0 0 | 0 0 | 0 0 | 35.31 |
| PTHR21698      | 0 | 45 0 0  | 0 0 | 0 0 | 0 0 | 0 0 | 0 0 | 53.25 |
| PTHR21699      | 0 | 18 0 0  | 0 0 | 0 0 | 0 0 | 0 0 | 0 0 | 74.64 |
| PTHR21704.SF5  | 0 | 20 0 0  | 0 0 | 0 0 | 0 0 | 0 0 | 0 0 | 47.14 |
| PTHR21714      | 0 | 19 0 0  | 0 0 | 0 0 | 0 0 | 0 0 | 0 0 | 52.33 |
| PTHR21718      | 0 | 15 0 0  | 0 0 | 0 0 | 0 0 | 0 0 | 0 0 | 60.11 |
| PTHR21719      | 0 | 20 0 0  | 0 0 | 0 0 | 0 0 | 0 0 | 0 0 | 55.13 |
| PTHR21731      | 0 | 7 0 0   | 0 0 | 0 0 | 0 0 | 0 0 | 0 0 | 59.09 |
| PTHR21732      | 0 | 4 0 0   | 0 0 | 0 0 | 0 0 | 0 0 | 0 0 | 88.28 |
| PTHR21737.SF3  | 0 | 11 0 0  | 0 0 | 0 0 | 0 0 | 0 0 | 0 0 | 40.95 |
| PTHR21763      | 0 | 11 0 0  | 0 0 | 0 0 | 0 0 | 0 0 | 0 0 | 72.49 |
| PTHR21765      | 0 | 4 0 0   | 0 0 | 0 0 | 0 0 | 0 0 | 0 0 | 72.71 |
| PTHR21770      | 0 | 7 0 0   | 0 0 | 0 0 | 0 0 | 0 0 | 0 0 | 81.26 |

|                |   |        |     |     |     |     |     |       |
|----------------|---|--------|-----|-----|-----|-----|-----|-------|
| PTHR21771      | 0 | 6 0 0  | 0 0 | 0 0 | 0 0 | 0 0 | 0 0 | 50.24 |
| PTHR21779      | 0 | 19 0 0 | 0 0 | 0 0 | 0 0 | 0 0 | 0 0 | 68.37 |
| PTHR21796      | 0 | 7 0 0  | 0 0 | 0 0 | 0 0 | 0 0 | 0 0 | 77.07 |
| PTHR21797      | 0 | 19 0 0 | 0 0 | 0 0 | 0 0 | 0 0 | 0 0 | 62.41 |
| PTHR21800      | 0 | 16 0 0 | 0 0 | 0 0 | 0 0 | 0 0 | 0 0 | 60.16 |
| PTHR21812      | 0 | 27 0 0 | 0 0 | 0 0 | 0 0 | 0 0 | 0 0 | 52.8  |
| PTHR21818      | 0 | 31 0 0 | 0 0 | 0 0 | 0 0 | 0 0 | 0 0 | 27.03 |
| PTHR21824      | 0 | 26 0 0 | 0 0 | 0 0 | 0 0 | 0 0 | 0 0 | 33.71 |
| PTHR21825      | 0 | 16 0 0 | 0 0 | 0 0 | 0 0 | 0 0 | 0 0 | 62.17 |
| PTHR21831      | 0 | 3 0 0  | 0 0 | 0 0 | 0 0 | 0 0 | 0 0 | 55.79 |
| PTHR21844      | 0 | 10 0 0 | 0 0 | 0 0 | 0 0 | 0 0 | 0 0 | 46.77 |
| PTHR21845      | 0 | 11 0 0 | 0 0 | 0 0 | 0 0 | 0 0 | 0 0 | 46.08 |
| PTHR21846      | 0 | 15 0 0 | 0 0 | 0 0 | 0 0 | 0 0 | 0 0 | 72.95 |
| PTHR21851      | 0 | 13 0 0 | 0 0 | 0 0 | 0 0 | 0 0 | 0 0 | 46.34 |
| PTHR21857-SF2  | 0 | 12 0 0 | 0 0 | 0 0 | 0 0 | 0 0 | 0 0 | 50.01 |
| PTHR21862      | 0 | 19 0 0 | 0 0 | 0 0 | 0 0 | 0 0 | 0 0 | 74.94 |
| PTHR21871      | 0 | 14 0 0 | 0 0 | 0 0 | 0 0 | 0 0 | 0 0 | 73.19 |
| PTHR21908      | 0 | 13 0 0 | 0 0 | 0 0 | 0 0 | 0 0 | 0 0 | 63.38 |
| PTHR21922      | 0 | 30 0 0 | 0 0 | 0 0 | 0 0 | 0 0 | 0 0 | 40.93 |
| PTHR21924      | 0 | 17 0 0 | 0 0 | 0 0 | 0 0 | 0 0 | 0 0 | 59.7  |
| PTHR21926      | 0 | 12 0 0 | 0 0 | 0 0 | 0 0 | 0 0 | 0 0 | 83.94 |
| PTHR21931      | 0 | 14 0 0 | 0 0 | 0 0 | 0 0 | 0 0 | 0 0 | 41.49 |
| PTHR21932      | 0 | 37 0 0 | 0 0 | 0 0 | 0 0 | 0 0 | 0 0 | 43.66 |
| PTHR21958      | 0 | 15 0 0 | 0 0 | 0 0 | 0 0 | 0 0 | 0 0 | 68.14 |
| PTHR21959      | 0 | 51 0 0 | 0 0 | 0 0 | 0 0 | 0 0 | 0 0 | 45    |
| PTHR21968      | 0 | 15 0 0 | 0 0 | 0 0 | 0 0 | 0 0 | 0 0 | 51.2  |
| PTHR21972      | 0 | 10 0 0 | 0 0 | 0 0 | 0 0 | 0 0 | 0 0 | 72.32 |
| PTHR22016      | 0 | 13 0 0 | 0 0 | 0 0 | 0 0 | 0 0 | 0 0 | 84.93 |
| PTHR22019      | 0 | 15 0 0 | 0 0 | 0 0 | 0 0 | 0 0 | 0 0 | 67.93 |
| PTHR22027      | 0 | 15 0 0 | 0 0 | 0 0 | 0 0 | 0 0 | 0 0 | 54.49 |
| PTHR22028      | 0 | 21 0 0 | 0 0 | 0 0 | 0 0 | 0 0 | 0 0 | 42.43 |
| PTHR22042      | 0 | 11 0 0 | 0 0 | 0 0 | 0 0 | 0 0 | 0 0 | 33.15 |
| PTHR22068      | 0 | 14 0 0 | 0 0 | 0 0 | 0 0 | 0 0 | 0 0 | 63.01 |
| PTHR22083      | 0 | 13 0 0 | 0 0 | 0 0 | 0 0 | 0 0 | 0 0 | 52.22 |
| PTHR22091      | 0 | 9 0 0  | 0 0 | 0 0 | 0 0 | 0 0 | 1 1 | 56.77 |
| PTHR22095      | 0 | 17 0 0 | 0 0 | 0 0 | 0 0 | 0 0 | 0 0 | 78.18 |
| PTHR22107      | 0 | 15 0 0 | 0 0 | 0 0 | 0 0 | 0 0 | 0 0 | 60.5  |
| PTHR22123      | 0 | 13 0 0 | 0 0 | 0 0 | 0 0 | 0 0 | 0 0 | 48.45 |
| PTHR22133      | 0 | 27 0 0 | 0 0 | 0 0 | 0 0 | 0 0 | 0 0 | 45.37 |
| PTHR22147      | 0 | 17 0 0 | 0 0 | 0 0 | 0 0 | 0 0 | 0 0 | 72.36 |
| PTHR22171      | 0 | 5 0 0  | 0 0 | 0 0 | 0 0 | 0 0 | 0 0 | 62.55 |
| PTHR22175      | 0 | 10 0 0 | 0 0 | 0 0 | 0 0 | 0 0 | 0 0 | 67.72 |
| PTHR22181      | 0 | 16 0 0 | 0 0 | 0 0 | 0 0 | 0 0 | 0 0 | 77.33 |
| PTHR22192-SF1  | 0 | 5 0 0  | 0 0 | 0 0 | 0 0 | 0 0 | 0 0 | 88.96 |
| PTHR22207      | 0 | 41 0 0 | 0 0 | 0 0 | 0 0 | 0 0 | 0 0 | 37.3  |
| PTHR22234      | 0 | 7 0 0  | 0 0 | 0 0 | 0 0 | 0 0 | 0 0 | 63.49 |
| PTHR22256      | 0 | 13 0 0 | 0 0 | 0 0 | 0 0 | 0 0 | 0 0 | 69.82 |
| PTHR22281      | 0 | 10 0 0 | 0 0 | 0 0 | 0 0 | 0 0 | 0 0 | 56.12 |
| PTHR22285      | 0 | 12 0 0 | 0 0 | 0 0 | 0 0 | 0 0 | 0 0 | 67.53 |
| PTHR22294      | 0 | 7 0 0  | 0 0 | 0 0 | 0 0 | 0 0 | 0 0 | 85.09 |
| PTHR22307      | 0 | 24 0 0 | 0 0 | 0 0 | 0 0 | 0 0 | 0 0 | 68.94 |
| PTHR22373      | 0 | 12 0 0 | 0 0 | 0 0 | 0 0 | 0 0 | 0 0 | 59.31 |
| PTHR22385      | 0 | 16 0 0 | 0 0 | 0 0 | 0 0 | 0 0 | 0 0 | 59.6  |
| PTHR22397      | 0 | 3 0 0  | 0 0 | 0 0 | 0 0 | 0 0 | 0 0 | 57.49 |
| PTHR22401      | 0 | 22 0 0 | 0 0 | 0 0 | 0 0 | 0 0 | 0 0 | 69.15 |
| PTHR22414      | 0 | 4 0 0  | 0 0 | 0 0 | 0 0 | 0 0 | 0 0 | 75.43 |
| PTHR22415      | 0 | 14 0 0 | 0 0 | 0 0 | 0 0 | 0 0 | 0 0 | 69.89 |
| PTHR22418      | 0 | 16 0 0 | 0 0 | 0 0 | 0 0 | 0 0 | 0 0 | 79.78 |
| PTHR22420      | 0 | 6 0 0  | 0 0 | 0 0 | 0 0 | 0 0 | 0 0 | 44.73 |
| PTHR22422-SF1  | 0 | 3 0 0  | 0 0 | 0 0 | 0 0 | 0 0 | 0 0 | 73.77 |
| PTHR22422-SF2  | 0 | 3 0 0  | 0 0 | 0 0 | 0 0 | 0 0 | 0 0 | 67.21 |
| PTHR22424      | 0 | 15 0 0 | 0 0 | 0 0 | 0 0 | 0 0 | 0 0 | 56.57 |
| PTHR22425      | 0 | 33 0 0 | 0 0 | 0 0 | 0 0 | 0 0 | 0 0 | 27.04 |
| PTHR22428      | 0 | 20 0 0 | 0 0 | 0 0 | 0 0 | 0 0 | 0 0 | 36.53 |
| PTHR22430      | 0 | 12 0 0 | 0 0 | 0 0 | 0 0 | 0 0 | 0 0 | 47.94 |
| PTHR22442      | 0 | 5 0 0  | 0 0 | 0 0 | 0 0 | 0 0 | 0 0 | 38.56 |
| PTHR22443-SF8  | 0 | 8 0 0  | 0 0 | 0 0 | 0 0 | 0 0 | 0 0 | 73.15 |
| PTHR22446      | 0 | 8 0 0  | 0 0 | 0 0 | 0 0 | 0 0 | 0 0 | 58.47 |
| PTHR22455      | 0 | 7 0 0  | 0 0 | 0 0 | 0 0 | 0 0 | 0 0 | 35.05 |
| PTHR22455-SF8  | 0 | 41 0 0 | 0 0 | 0 0 | 0 0 | 0 0 | 0 0 | 47.25 |
| PTHR22458      | 0 | 12 0 0 | 0 0 | 0 0 | 0 0 | 0 0 | 0 0 | 46.91 |
| PTHR22463      | 0 | 15 0 0 | 0 0 | 0 0 | 0 0 | 0 0 | 0 0 | 60.44 |
| PTHR22497      | 0 | 25 0 0 | 0 0 | 0 0 | 0 0 | 0 0 | 0 0 | 69.65 |
| PTHR22526      | 0 | 23 0 0 | 0 0 | 0 0 | 0 0 | 0 0 | 0 0 | 49.4  |
| PTHR22530      | 0 | 10 0 0 | 0 0 | 0 0 | 0 0 | 0 0 | 0 0 | 64.87 |
| PTHR22533      | 0 | 14 0 0 | 0 0 | 0 0 | 0 0 | 0 0 | 0 0 | 73.01 |
| PTHR22539      | 0 | 15 0 0 | 0 0 | 0 0 | 0 0 | 0 0 | 0 0 | 70.02 |
| PTHR22543      | 0 | 22 0 0 | 0 0 | 0 0 | 0 0 | 0 0 | 0 0 | 67.83 |
| PTHR22546      | 0 | 6 0 0  | 0 0 | 0 0 | 0 0 | 0 0 | 0 0 | 93.03 |
| PTHR22551-SF1  | 0 | 13 0 0 | 0 0 | 0 0 | 0 0 | 0 0 | 0 0 | 49.1  |
| PTHR22552      | 0 | 40 0 0 | 0 0 | 0 0 | 0 0 | 0 0 | 0 0 | 60.06 |
| PTHR22572-SF8  | 0 | 25 0 0 | 0 0 | 0 0 | 0 0 | 0 0 | 0 0 | 35.99 |
| PTHR22593-SF3  | 0 | 8 0 0  | 0 0 | 0 0 | 0 0 | 0 0 | 0 0 | 63.55 |
| PTHR22593-SF4  | 0 | 14 0 0 | 0 0 | 0 0 | 0 0 | 0 0 | 0 0 | 76.61 |
| PTHR22611-SF4  | 0 | 14 0 0 | 0 0 | 0 0 | 0 0 | 0 0 | 0 0 | 74.85 |
| PTHR22622      | 0 | 13 0 0 | 0 0 | 0 0 | 0 0 | 0 0 | 0 0 | 71.49 |
| PTHR22654      | 0 | 24 0 0 | 0 0 | 0 0 | 0 0 | 0 0 | 0 0 | 45.44 |
| PTHR22659      | 0 | 7 0 0  | 0 0 | 0 0 | 0 0 | 0 0 | 0 0 | 65.35 |
| PTHR22663-SF10 | 0 | 29 0 0 | 0 0 | 0 0 | 0 0 | 0 0 | 0 0 | 22.21 |
| PTHR22666      | 0 | 26 0 0 | 0 0 | 0 0 | 0 0 | 0 0 | 0 0 | 33.01 |
| PTHR22691-SF1  | 0 | 10 0 0 | 0 0 | 0 0 | 0 0 | 0 0 | 0 0 | 34.88 |
| PTHR22696      | 0 | 8 0 0  | 0 0 | 0 0 | 0 0 | 0 0 | 0 0 | 88.36 |
| PTHR22708      | 0 | 19 0 0 | 0 0 | 0 0 | 0 0 | 0 0 | 0 0 | 39.11 |
| PTHR22720      | 0 | 10 0 0 | 0 0 | 0 0 | 0 0 | 0 0 | 0 0 | 65.54 |
| PTHR22739      | 0 | 42 0 0 | 0 0 | 0 0 | 0 0 | 0 0 | 0 0 | 37.19 |
| PTHR22774-SF4  | 0 | 7 0 0  | 0 0 | 0 0 | 0 0 | 0 0 | 0 0 | 59.22 |
| PTHR22774-SF6  | 0 | 10 0 0 | 0 0 | 0 0 | 0 0 | 0 0 | 0 0 | 78.73 |
| PTHR22776-SF6  | 0 | 14 0 0 | 0 0 | 0 0 | 0 0 | 0 0 | 0 0 | 64.24 |
| PTHR22779      | 0 | 3 0 0  | 0 0 | 0 0 | 0 0 | 0 0 | 0 0 | 66.35 |
| PTHR22796      | 0 | 7 0 0  | 0 0 | 0 0 | 0 0 | 0 0 | 0 0 | 73.85 |
| PTHR22810      | 0 | 3 0 0  | 0 0 | 0 0 | 0 0 | 0 0 | 0 0 | 61.16 |
| PTHR22875-SF1  | 0 | 37 0 0 | 0 0 | 0 0 | 0 0 | 0 0 | 0 0 | 50.54 |
| PTHR22880-SF19 | 0 | 8 0 0  | 0 0 | 0 0 | 0 0 | 0 0 | 0 0 | 33.39 |
| PTHR22904-SF19 | 0 | 36 0 0 | 0 0 | 0 0 | 0 0 | 0 0 | 0 0 | 34.06 |
| PTHR22909-SF4  | 0 | 8 0 0  | 0 0 | 0 0 | 0 0 | 0 0 | 0 0 | 55    |
| PTHR22909-SF5  | 0 | 14 0 0 | 0 0 | 0 0 | 0 0 | 0 0 | 0 0 | 79.42 |
| PTHR22932      | 0 | 6 0 0  | 0 0 | 0 0 | 0 0 | 0 0 | 0 0 | 37.74 |
| PTHR22934-SF14 | 0 | 14 0 0 | 0 0 | 0 0 | 0 0 | 0 0 | 0 0 | 77.25 |
| PTHR22949      | 0 | 16 0 0 | 0 0 | 0 0 | 0 0 | 0 0 | 0 0 | 42.08 |
| PTHR22953      | 0 | 16 0 0 | 0 0 | 0 0 | 0 0 | 0 0 | 0 0 | 12.04 |
| PTHR22973-SF3  | 0 | 6 0 0  | 0 0 | 0 0 | 0 0 | 0 0 | 0 0 | 79.24 |
| PTHR22980      | 0 | 26 0 0 | 0 0 | 0 0 | 0 0 | 0 0 | 0 0 | 43.63 |
| PTHR22996      | 0 | 12 0 0 | 0 0 | 0 0 | 0 0 | 0 0 | 0 0 | 30.11 |
| PTHR23006      | 0 | 3 0 0  | 0 0 | 0 0 | 0 0 | 0 0 | 0 0 | 52.39 |
| PTHR23019      | 0 | 34 0 0 | 0 0 | 0 0 | 0 0 | 0 0 | 0 0 | 26.06 |
| PTHR23023-SF1  | 0 | 45 0 0 | 0 0 | 0 0 | 0 0 | 0 0 | 0 0 | 22.18 |
| PTHR23033      | 0 | 15 0 0 | 0 0 | 0 0 | 0 0 | 0 0 | 0 0 | 26.04 |
| PTHR23033-SF1  | 0 | 8 0 0  | 0 0 | 0 0 | 0 0 | 0 0 | 0 0 | 22.15 |
| PTHR23033-SF2  | 0 | 6 0 0  | 0 0 | 0 0 | 0 0 | 0 0 | 0 0 | 53.9  |
| PTHR23035      | 0 | 9 0 0  | 0 0 | 0 0 | 0 0 | 0 0 | 0 0 | 55.82 |
| PTHR23051      | 0 | 12 0 0 | 0 0 | 0 0 | 0 0 | 0 0 | 0 0 | 27.24 |
| PTHR23055-SF32 | 0 | 15 0 0 | 0 0 | 0 0 | 0 0 | 0 0 | 0 0 | 63.92 |
| PTHR23056-SF2  | 0 | 17 0 0 | 0 0 | 0 0 | 0 0 | 0 0 | 0 0 | 33.39 |
| PTHR23056-SF6  | 0 | 23 0 0 | 0 0 | 0 0 | 0 0 | 0 0 | 0 0 | 62.8  |
| PTHR23056-SF7  | 0 | 17 0 0 | 0 0 | 0 0 | 0 0 | 0 0 | 0 0 | 56.22 |
| PTHR23067-SF2  | 0 | 4 0 0  | 0 0 | 0 0 | 0 0 | 0 0 | 0 0 | 78.89 |
| PTHR23071      | 0 | 7 0 0  | 0 0 | 0 0 | 0 0 | 0 0 | 0 0 | 15.47 |
| PTHR23072      | 0 | 9 0 0  | 0 0 | 0 0 | 0 0 | 0 0 | 0 0 | 18.85 |
| PTHR23093-SF3  | 0 | 14 0 0 | 0 0 | 0 0 | 0 0 | 0 0 | 0 0 | 72.37 |
| PTHR23094      | 0 | 6 0 0  | 0 0 | 0 0 | 0 0 | 0 0 | 0 0 | 55.92 |
| PTHR23095-SF5  | 0 | 8 0 0  | 0 0 | 0 0 | 0 0 | 0 0 | 0 0 | 76.68 |
| PTHR23096      | 0 | 7 0 0  | 0 0 | 0 0 | 0 0 | 0 0 | 0 0 | 75.4  |
| PTHR23098      | 0 | 10 0 0 | 0 0 | 0 0 | 0 0 | 0 0 | 0 0 | 54.71 |
| PTHR23110-SF3  | 0 | 3 0 0  | 0 0 | 0 0 | 0 0 | 0 0 | 0 0 | 68.68 |
| PTHR23116-SF1  | 0 | 3 0 0  | 0 0 | 0 0 | 0 0 | 0 0 | 0 0 | 67.07 |
| PTHR23120      | 0 | 42 0 0 | 0 0 | 0 0 | 0 0 | 0 0 | 0 0 | 15.21 |
| PTHR23125-SF22 | 0 | 27 0 0 | 0 0 | 0 0 | 0 0 | 0 0 | 0 0 | 37.35 |
| PTHR23125-SF26 | 0 | 5 0 0  | 0 0 | 0 0 | 0 0 | 0 0 | 0 0 | 50.96 |
| PTHR23125-SF48 | 0 | 4 0 0  | 0 0 | 0 0 | 0 0 | 0 0 | 0 0 | 60.22 |
| PTHR23133-SF3  | 0 | 34 0 0 | 0 0 | 0 0 | 0 0 | 0 0 | 0 0 | 31.69 |
| PTHR23147      | 0 | 14 0 0 | 0 0 | 0 0 | 0 0 | 0 0 | 0 0 | 19.75 |
| PTHR23154-SF40 | 0 | 14 0 0 | 0 0 | 0 0 | 0 0 | 0 0 | 0 0 | 56.06 |
| PTHR23156      | 0 | 19 0 0 | 0 0 | 0 0 | 0 0 | 0 0 | 0 0 | 68.54 |
| PTHR23158-SF1  | 0 | 4 0 0  | 0 0 | 0 0 | 0 0 | 0 0 | 0 0 | 47.15 |
| PTHR23159-SF4  | 0 | 14 0 0 | 0 0 | 0 0 | 0 0 | 0 0 | 0 0 | 85.24 |
| PTHR23159-SF5  | 0 | 14 0 0 | 0 0 | 0 0 | 0 0 | 0 0 | 0 0 | 41.67 |
| PTHR23161-SF2  | 0 | 8 0 0  | 0 0 | 0 0 | 0 0 | 0 0 | 0 0 | 57.41 |

|                |   |         |     |     |     |     |     |       |
|----------------|---|---------|-----|-----|-----|-----|-----|-------|
| PTHR23162      | 0 | 13 0 0  | 0 0 | 0 0 | 0 0 | 0 0 | 0 0 | 90.57 |
| PTHR23162-SF1  | 0 | 5 0 0   | 0 0 | 0 0 | 0 0 | 0 0 | 0 0 | 23.33 |
| PTHR23162-SF2  | 0 | 9 0 0   | 0 0 | 0 0 | 0 0 | 0 0 | 0 0 | 84.78 |
| PTHR23163      | 0 | 13 0 0  | 0 0 | 0 0 | 0 0 | 0 0 | 0 0 | 13.58 |
| PTHR23170      | 0 | 6 0 0   | 0 0 | 0 0 | 0 0 | 0 0 | 0 0 | 44.65 |
| PTHR23180-SF16 | 0 | 8 0 0   | 0 0 | 0 0 | 0 0 | 0 0 | 0 0 | 32.74 |
| PTHR23185      | 0 | 41 0 0  | 0 0 | 0 0 | 0 0 | 0 0 | 0 0 | 43.28 |
| PTHR23186      | 0 | 36 0 0  | 0 0 | 0 0 | 0 0 | 0 0 | 0 0 | 35.42 |
| PTHR23191      | 0 | 13 0 0  | 0 0 | 0 0 | 0 0 | 0 0 | 0 0 | 80.54 |
| PTHR23191-SF1  | 0 | 5 0 0   | 0 0 | 0 0 | 0 0 | 0 0 | 0 0 | 100   |
| PTHR23191-SF2  | 0 | 12 0 0  | 0 0 | 0 0 | 0 0 | 0 0 | 0 0 | 79.42 |
| PTHR23193-SF2  | 0 | 30 0 0  | 0 0 | 0 0 | 0 0 | 0 0 | 0 0 | 29.83 |
| PTHR23193-SF4  | 0 | 5 0 0   | 0 0 | 0 0 | 0 0 | 0 0 | 0 0 | 38.57 |
| PTHR23193-SF5  | 0 | 26 0 0  | 0 0 | 0 0 | 0 0 | 0 0 | 0 0 | 26.12 |
| PTHR23197-SF1  | 0 | 3 0 0   | 0 0 | 0 0 | 0 0 | 0 0 | 0 0 | 57.05 |
| PTHR23197-SF4  | 0 | 15 0 0  | 0 0 | 0 0 | 0 0 | 0 0 | 0 0 | 68.52 |
| PTHR23202-SF3  | 0 | 8 0 0   | 0 0 | 0 0 | 0 0 | 0 0 | 0 0 | 47.5  |
| PTHR23202-SF6  | 0 | 4 0 0   | 0 0 | 0 0 | 0 0 | 0 0 | 0 0 | 70.15 |
| PTHR23203      | 0 | 14 0 0  | 0 0 | 0 0 | 0 0 | 0 0 | 0 0 | 50.71 |
| PTHR23205      | 0 | 10 0 0  | 0 0 | 0 0 | 0 0 | 0 0 | 0 0 | 29.66 |
| PTHR23207      | 0 | 12 0 0  | 0 0 | 0 0 | 0 0 | 0 0 | 0 0 | 76.25 |
| PTHR23210      | 0 | 7 0 0   | 0 0 | 0 0 | 0 0 | 0 0 | 0 0 | 59.35 |
| PTHR23211      | 0 | 14 0 0  | 0 0 | 0 0 | 0 0 | 0 0 | 0 0 | 52.02 |
| PTHR23215      | 0 | 83 0 0  | 0 0 | 0 0 | 0 0 | 0 0 | 0 0 | 47.45 |
| PTHR23231-SF1  | 0 | 4 0 0   | 0 0 | 0 0 | 0 0 | 0 0 | 0 0 | 53.93 |
| PTHR23236-SF2  | 0 | 3 0 0   | 0 0 | 0 0 | 0 0 | 0 0 | 0 0 | 28.73 |
| PTHR23242-SF3  | 0 | 20 0 0  | 0 0 | 0 0 | 0 0 | 0 0 | 0 0 | 44.19 |
| PTHR23247      | 0 | 73 0 0  | 0 0 | 0 0 | 0 0 | 0 0 | 0 0 | 35.46 |
| PTHR23251      | 0 | 7 0 0   | 0 0 | 0 0 | 0 0 | 0 0 | 0 0 | 54.48 |
| PTHR23263-SF6  | 0 | 15 0 0  | 0 0 | 0 0 | 0 0 | 0 0 | 0 0 | 71.01 |
| PTHR23271-SF1  | 0 | 8 0 0   | 0 0 | 0 0 | 0 0 | 0 0 | 0 0 | 34.74 |
| PTHR23283-SF13 | 0 | 10 0 0  | 0 0 | 0 0 | 0 0 | 0 0 | 0 0 | 29.58 |
| PTHR23287      | 0 | 8 0 0   | 0 0 | 0 0 | 0 0 | 0 0 | 0 0 | 25.31 |
| PTHR23287-SF1  | 0 | 8 0 0   | 0 0 | 0 0 | 0 0 | 0 0 | 0 0 | 62.27 |
| PTHR23290      | 0 | 9 0 0   | 0 0 | 0 0 | 0 0 | 0 0 | 0 0 | 43.67 |
| PTHR23303-SF3  | 0 | 6 0 0   | 0 0 | 0 0 | 0 0 | 0 0 | 0 0 | 85.65 |
| PTHR23304-SF76 | 0 | 53 0 0  | 0 0 | 0 0 | 0 0 | 0 0 | 0 0 | 35.29 |
| PTHR23312-SF5  | 0 | 8 0 0   | 0 0 | 0 0 | 0 0 | 0 0 | 0 0 | 55.73 |
| PTHR23313      | 0 | 21 0 0  | 0 0 | 0 0 | 0 0 | 0 0 | 0 0 | 46.49 |
| PTHR23317-SF27 | 0 | 3 0 0   | 0 0 | 0 0 | 0 0 | 0 0 | 0 0 | 30.15 |
| PTHR23329-SF3  | 0 | 6 0 0   | 0 0 | 0 0 | 0 0 | 0 0 | 0 0 | 56.44 |
| PTHR23341-SF1  | 0 | 12 0 0  | 0 0 | 0 0 | 0 0 | 0 0 | 0 0 | 95.89 |
| PTHR23346      | 0 | 13 0 0  | 0 0 | 0 0 | 0 0 | 0 0 | 0 0 | 23.69 |
| PTHR23346-SF2  | 0 | 38 0 0  | 0 0 | 0 0 | 0 0 | 0 0 | 0 0 | 34.41 |
| PTHR23404-SF1  | 0 | 51 0 0  | 0 0 | 0 0 | 0 0 | 0 0 | 0 0 | 34.14 |
| PTHR23422      | 0 | 4 0 0   | 0 0 | 0 0 | 0 0 | 0 0 | 0 0 | 71.28 |
| PTHR23422-SF1  | 0 | 11 0 0  | 0 0 | 0 0 | 0 0 | 0 0 | 0 0 | 75.25 |
| TIGR00028      | 0 | 21 0 0  | 0 0 | 0 0 | 0 0 | 0 0 | 0 0 | 26.66 |
| TIGR00040      | 0 | 37 0 0  | 0 0 | 0 0 | 0 0 | 0 0 | 0 0 | 27.44 |
| TIGR00053      | 0 | 12 0 0  | 0 0 | 0 0 | 0 0 | 0 0 | 0 0 | 89.85 |
| TIGR00072      | 0 | 45 0 0  | 0 0 | 0 0 | 0 0 | 0 0 | 0 0 | 22.71 |
| TIGR00173      | 0 | 6 0 0   | 0 0 | 0 0 | 0 0 | 0 0 | 0 0 | 61.64 |
| TIGR00221      | 0 | 19 0 0  | 0 0 | 0 0 | 0 0 | 0 0 | 0 0 | 48.25 |
| TIGR00282      | 0 | 30 0 0  | 0 0 | 0 0 | 0 0 | 0 0 | 0 0 | 43.16 |
| TIGR00284      | 0 | 6 0 0   | 0 0 | 0 0 | 0 0 | 0 0 | 0 0 | 37.11 |
| TIGR00327      | 0 | 15 0 0  | 0 0 | 0 0 | 0 0 | 0 0 | 0 0 | 41.31 |
| TIGR00374      | 0 | 7 0 0   | 0 0 | 0 0 | 0 0 | 0 0 | 0 0 | 5.83  |
| TIGR00375      | 0 | 7 0 0   | 0 0 | 0 0 | 0 0 | 0 0 | 0 0 | 65.44 |
| TIGR00384      | 0 | 570 0 0 | 0 0 | 0 0 | 0 0 | 0 0 | 0 0 | 42.47 |
| TIGR00397      | 0 | 61 0 0  | 0 0 | 0 0 | 0 0 | 0 0 | 0 0 | 68.74 |
| TIGR00412      | 0 | 77 0 0  | 0 0 | 0 0 | 0 0 | 0 0 | 0 0 | 45.73 |
| TIGR00536      | 0 | 8 0 0   | 0 0 | 0 0 | 0 0 | 0 0 | 0 0 | 23.75 |
| TIGR00562      | 0 | 4 0 0   | 0 0 | 0 0 | 0 0 | 0 0 | 0 0 | 44.54 |
| TIGR00611      | 0 | 18 0 0  | 0 0 | 0 0 | 0 0 | 0 0 | 0 0 | 30.36 |
| TIGR00613      | 0 | 5 0 0   | 0 0 | 0 0 | 0 0 | 0 0 | 0 0 | 20.72 |
| TIGR00618      | 0 | 37 0 0  | 0 0 | 0 0 | 0 0 | 0 0 | 0 0 | 74.64 |
| TIGR00661      | 0 | 39 0 0  | 0 0 | 0 0 | 0 0 | 0 0 | 0 0 | 48.14 |
| TIGR00690      | 0 | 12 0 0  | 0 0 | 0 0 | 0 0 | 0 0 | 0 0 | 52.43 |
| TIGR00725      | 0 | 9 0 0   | 0 0 | 0 0 | 0 0 | 0 0 | 0 0 | 46.93 |
| TIGR00775      | 0 | 4 0 0   | 0 0 | 0 0 | 0 0 | 0 0 | 0 0 | 89.46 |
| TIGR00792      | 0 | 134 0 0 | 0 0 | 0 0 | 0 0 | 0 0 | 0 0 | 34.72 |
| TIGR00814      | 0 | 54 0 0  | 0 0 | 0 0 | 0 0 | 0 0 | 0 0 | 62.4  |
| TIGR00857      | 0 | 11 0 0  | 0 0 | 0 0 | 0 0 | 0 0 | 0 0 | 47.87 |
| TIGR00862      | 0 | 38 0 0  | 0 0 | 0 0 | 0 0 | 0 0 | 0 0 | 73.91 |
| TIGR00905      | 0 | 57 0 0  | 0 0 | 0 0 | 0 0 | 0 0 | 0 0 | 64.99 |
| TIGR00910      | 0 | 3 0 0   | 0 0 | 0 0 | 0 0 | 0 0 | 0 0 | 99.84 |
| TIGR00924      | 0 | 4 0 0   | 0 0 | 0 0 | 0 0 | 0 0 | 0 0 | 96.61 |
| TIGR00964      | 0 | 5 0 0   | 0 0 | 0 0 | 0 0 | 0 0 | 0 0 | 43.42 |
| TIGR00965      | 0 | 20 0 0  | 0 0 | 0 0 | 0 0 | 0 0 | 0 0 | 63.06 |
| TIGR01000      | 0 | 25 0 0  | 0 0 | 0 0 | 0 0 | 0 0 | 0 0 | 48    |
| TIGR01010      | 0 | 14 0 0  | 0 0 | 0 0 | 0 0 | 0 0 | 0 0 | 69.48 |
| TIGR01023      | 0 | 5 0 0   | 0 0 | 0 0 | 0 0 | 0 0 | 0 0 | 40.07 |
| TIGR01079      | 0 | 39 0 0  | 0 0 | 0 0 | 0 0 | 0 0 | 0 0 | 46.34 |
| TIGR01091      | 0 | 9 0 0   | 0 0 | 0 0 | 0 0 | 0 0 | 0 0 | 52.05 |
| TIGR01110      | 0 | 87 0 0  | 0 0 | 0 0 | 0 0 | 0 0 | 0 0 | 68.19 |
| TIGR01128      | 0 | 7 0 0   | 0 0 | 0 0 | 0 0 | 0 0 | 0 0 | 17.53 |
| TIGR01172      | 0 | 235 0 0 | 0 0 | 0 0 | 0 0 | 0 0 | 0 0 | 58.27 |
| TIGR01201      | 0 | 10 0 0  | 0 0 | 0 0 | 0 0 | 0 0 | 0 0 | 13.79 |
| TIGR01202      | 0 | 3 0 0   | 0 0 | 0 0 | 0 0 | 0 0 | 0 0 | 60.48 |
| TIGR01206      | 0 | 19 0 0  | 0 0 | 0 0 | 0 0 | 0 0 | 0 0 | 55.42 |
| TIGR01213      | 0 | 3 0 0   | 0 0 | 0 0 | 0 0 | 0 0 | 0 0 | 32.57 |
| TIGR01253      | 0 | 3 0 0   | 0 0 | 0 0 | 0 0 | 0 0 | 0 0 | 58.43 |
| TIGR01295      | 0 | 10 0 0  | 0 0 | 0 0 | 0 0 | 0 0 | 0 0 | 99.22 |
| TIGR01395      | 0 | 4 0 0   | 0 0 | 0 0 | 0 0 | 0 0 | 0 0 | 55.49 |
| TIGR01448      | 0 | 35 0 0  | 0 0 | 0 0 | 0 0 | 0 0 | 0 0 | 49.64 |
| TIGR01545      | 0 | 57 0 0  | 0 0 | 0 0 | 0 0 | 0 0 | 0 0 | 82.17 |
| TIGR01560      | 0 | 6 0 0   | 0 0 | 0 0 | 0 0 | 0 0 | 0 0 | 78.63 |
| TIGR01583      | 0 | 33 0 0  | 0 0 | 0 0 | 0 0 | 0 0 | 0 0 | 34.07 |
| TIGR01618      | 0 | 7 0 0   | 0 0 | 0 0 | 0 0 | 0 0 | 0 0 | 44.64 |
| TIGR01636      | 0 | 33 0 0  | 0 0 | 0 0 | 0 0 | 0 0 | 0 0 | 27.54 |
| TIGR01637      | 0 | 42 0 0  | 0 0 | 0 0 | 0 0 | 0 0 | 0 0 | 24.18 |
| TIGR01652      | 0 | 6 0 0   | 0 0 | 0 0 | 0 0 | 0 0 | 0 0 | 43.33 |
| TIGR01653      | 0 | 3 0 0   | 0 0 | 0 0 | 0 0 | 0 0 | 0 0 | 93.36 |
| TIGR01654      | 0 | 10 0 0  | 0 0 | 0 0 | 0 0 | 0 0 | 0 0 | 98.78 |
| TIGR01655      | 0 | 17 0 0  | 0 0 | 0 0 | 0 0 | 0 0 | 0 0 | 71.9  |
| TIGR01660      | 0 | 143 0 0 | 0 0 | 0 0 | 0 0 | 0 0 | 0 0 | 63.3  |
| TIGR01668      | 0 | 11 0 0  | 0 0 | 0 0 | 0 0 | 0 0 | 0 0 | 35.61 |
| TIGR01685      | 0 | 38 0 0  | 0 0 | 0 0 | 0 0 | 0 0 | 0 0 | 41.83 |
| TIGR01691      | 0 | 7 0 0   | 0 0 | 0 0 | 0 0 | 0 0 | 0 0 | 37.1  |
| TIGR01708      | 0 | 5 0 0   | 0 0 | 0 0 | 0 0 | 0 0 | 0 0 | 21.34 |
| TIGR01711      | 0 | 5 0 0   | 0 0 | 0 0 | 0 0 | 0 0 | 0 0 | 39.54 |
| TIGR01737      | 0 | 4 0 0   | 0 0 | 0 0 | 0 0 | 0 0 | 0 0 | 49.11 |
| TIGR01755      | 0 | 4 0 0   | 0 0 | 0 0 | 0 0 | 0 0 | 0 0 | 42.11 |
| TIGR01827      | 0 | 6 0 0   | 0 0 | 0 0 | 0 0 | 0 0 | 0 0 | 55.5  |
| TIGR01881      | 0 | 6 0 0   | 0 0 | 0 0 | 0 0 | 0 0 | 0 0 | 61.04 |
| TIGR01884      | 0 | 9 0 0   | 0 0 | 0 0 | 0 0 | 0 0 | 0 0 | 48.53 |
| TIGR01889      | 0 | 143 0 0 | 0 0 | 0 0 | 0 0 | 0 0 | 0 0 | 25.59 |
| TIGR01903      | 0 | 20 0 0  | 0 0 | 0 0 | 0 0 | 0 0 | 0 0 | 20.65 |
| TIGR01918      | 0 | 8 0 0   | 0 0 | 0 0 | 0 0 | 0 0 | 0 0 | 57.97 |
| TIGR01921      | 0 | 5 0 0   | 0 0 | 0 0 | 0 0 | 0 0 | 0 0 | 44.49 |
| TIGR01926      | 0 | 4 0 0   | 0 0 | 0 0 | 0 0 | 0 0 | 0 0 | 14.01 |
| TIGR01928      | 0 | 18 0 0  | 0 0 | 0 0 | 0 0 | 0 0 | 0 0 | 76.19 |
| TIGR01975      | 0 | 7 0 0   | 0 0 | 0 0 | 0 0 | 0 0 | 0 0 | 57.36 |
| TIGR02019      | 0 | 10 0 0  | 0 0 | 0 0 | 0 0 | 0 0 | 0 0 | 64.27 |
| TIGR02046      | 0 | 33 0 0  | 0 0 | 0 0 | 0 0 | 0 0 | 0 0 | 29.96 |
| TIGR02092      | 0 | 3 0 0   | 0 0 | 0 0 | 0 0 | 0 0 | 0 0 | 26.24 |
| TIGR02099      | 0 | 190 0 0 | 0 0 | 0 0 | 0 0 | 0 0 | 0 0 | 16.68 |
| TIGR02108      | 0 | 45 0 0  | 0 0 | 0 0 | 0 0 | 0 0 | 0 0 | 46.42 |
| TIGR02122      | 0 | 64 0 0  | 0 0 | 0 0 | 0 0 | 0 0 | 0 0 | 14.75 |
| TIGR02132      | 0 | 14 0 0  | 0 0 | 0 0 | 0 0 | 0 0 | 0 0 | 96.4  |
| TIGR02187      | 0 | 23 0 0  | 0 0 | 0 0 | 0 0 | 0 0 | 0 0 | 36.94 |
| TIGR02215      | 0 | 25 0 0  | 0 0 | 0 0 | 0 0 | 0 0 | 0 0 | 23.72 |
| TIGR02219      | 0 | 12 0 0  | 0 0 | 0 0 | 0 0 | 0 0 | 0 0 | 52.97 |
| TIGR02228      | 0 | 27 0 0  | 0 0 | 0 0 | 0 0 | 0 0 | 0 0 | 19.4  |
| TIGR02243      | 0 | 15 0 0  | 0 0 | 0 0 | 0 0 | 0 0 | 0 0 | 16.77 |
| TIGR02270      | 0 | 15 0 0  | 0 0 | 0 0 | 0 0 | 0 0 | 0 0 | 23.86 |
| TIGR02274      | 0 | 15 0 0  | 0 0 | 0 0 | 0 0 | 0 0 | 0 0 | 32.94 |
| TIGR02285      | 0 | 4 0 0   | 0 0 | 0 0 | 0 0 | 0 0 | 0 0 | 42.37 |
| TIGR02287      | 0 | 23 0 0  | 0 0 | 0 0 | 0 0 | 0 0 | 0 0 | 72.5  |
| TIGR02291      | 0 | 37 0 0  | 0 0 | 0 0 | 0 0 | 0 0 | 0 0 | 61.58 |
| TIGR02302      | 0 | 53 0 0  | 0 0 | 0 0 | 0 0 | 0 0 | 0 0 | 36.05 |
| TIGR02304      | 0 | 29 0 0  | 0 0 | 0 0 | 0 0 | 0 0 | 0 0 | 47.17 |
| TIGR02318      | 0 | 15 0 0  | 0 0 | 0 0 | 0 0 | 0 0 | 0 0 | 57.66 |
| TIGR02366      | 0 | 8 0 0   | 0 0 | 0 0 | 0 0 | 0 0 | 0 0 | 50.92 |
| TIGR02385      | 0 | 16 0 0  | 0 0 | 0 0 | 0 0 | 0 0 | 0 0 | 25.84 |
| TIGR02449      | 0 | 38 0 0  | 0 0 | 0 0 | 0 0 | 0 0 | 0 0 | 48.27 |
| TIGR02451      | 0 | 56 0 0  | 0 0 | 0 0 | 0 0 | 0 0 | 0 0 | 27.96 |

|           |   |          |     |     |     |     |     |       |
|-----------|---|----------|-----|-----|-----|-----|-----|-------|
| TIGR02455 | 0 | 9 0 0    | 0 0 | 0 0 | 0 0 | 0 0 | 0 0 | 78.24 |
| TIGR02466 | 0 | 32 0 0   | 0 0 | 0 0 | 0 0 | 0 0 | 0 0 | 19.76 |
| TIGR02473 | 0 | 22 0 0   | 0 0 | 0 0 | 0 0 | 0 0 | 0 0 | 46.89 |
| TIGR02484 | 0 | 56 0 0   | 0 0 | 0 0 | 0 0 | 0 0 | 0 0 | 58.64 |
| TIGR02491 | 0 | 11 0 0   | 0 0 | 0 0 | 0 0 | 0 0 | 0 0 | 69.34 |
| TIGR02500 | 0 | 48 0 0   | 0 0 | 0 0 | 0 0 | 0 0 | 0 0 | 20.81 |
| TIGR02501 | 0 | 15 0 0   | 0 0 | 0 0 | 0 0 | 0 0 | 0 0 | 42.67 |
| TIGR02503 | 0 | 10 0 0   | 0 0 | 0 0 | 0 0 | 0 0 | 0 0 | 59.14 |
| TIGR02505 | 0 | 21 0 0   | 0 0 | 0 0 | 0 0 | 0 0 | 0 0 | 67.69 |
| TIGR02521 | 0 | 12 0 0   | 0 0 | 0 0 | 0 0 | 0 0 | 0 0 | 20.5  |
| TIGR02547 | 0 | 4 0 0    | 0 0 | 0 0 | 0 0 | 0 0 | 0 0 | 44.28 |
| TIGR02552 | 0 | 14 0 0   | 0 0 | 0 0 | 0 0 | 0 0 | 0 0 | 69.32 |
| TIGR02562 | 0 | 32 0 0   | 0 0 | 0 0 | 0 0 | 0 0 | 0 0 | 41.46 |
| TIGR02569 | 0 | 26 0 0   | 0 0 | 0 0 | 0 0 | 0 0 | 0 0 | 66.74 |
| TIGR02585 | 0 | 40 0 0   | 0 0 | 0 0 | 0 0 | 0 0 | 0 0 | 19.72 |
| TIGR02592 | 0 | 8 0 0    | 0 0 | 0 0 | 0 0 | 0 0 | 0 0 | 37.42 |
| TIGR02609 | 0 | 4 0 0    | 0 0 | 0 0 | 0 0 | 0 0 | 0 0 | 39.73 |
| TIGR02621 | 0 | 6 0 0    | 0 0 | 0 0 | 0 0 | 0 0 | 0 0 | 27.15 |
| TIGR02635 | 0 | 6 0 0    | 0 0 | 0 0 | 0 0 | 0 0 | 0 0 | 67.16 |
| TIGR02642 | 0 | 6 0 0    | 0 0 | 0 0 | 0 0 | 0 0 | 0 0 | 21.18 |
| TIGR02665 | 0 | 15 0 0   | 0 0 | 0 0 | 0 0 | 0 0 | 0 0 | 32.02 |
| TIGR02680 | 0 | 29 0 0   | 0 0 | 0 0 | 0 0 | 0 0 | 0 0 | 18.42 |
| TIGR02684 | 0 | 78 0 0   | 0 0 | 0 0 | 0 0 | 0 0 | 0 0 | 39.6  |
| TIGR02722 | 0 | 116 0 0  | 0 0 | 0 0 | 0 0 | 0 0 | 0 0 | 36.35 |
| TIGR02738 | 0 | 19 0 0   | 0 0 | 0 0 | 0 0 | 0 0 | 0 0 | 45.48 |
| TIGR02740 | 0 | 18 0 0   | 0 0 | 0 0 | 0 0 | 0 0 | 0 0 | 29.4  |
| TIGR02743 | 0 | 24 0 0   | 0 0 | 0 0 | 0 0 | 0 0 | 0 0 | 35.87 |
| TIGR02745 | 0 | 14 0 0   | 0 0 | 0 0 | 0 0 | 0 0 | 0 0 | 29.32 |
| TIGR02750 | 0 | 10 0 0   | 0 0 | 0 0 | 0 0 | 0 0 | 0 0 | 46.07 |
| TIGR02773 | 0 | 21 0 0   | 0 0 | 0 0 | 0 0 | 0 0 | 0 0 | 41.6  |
| TIGR02774 | 0 | 21 0 0   | 0 0 | 0 0 | 0 0 | 0 0 | 0 0 | 55.68 |
| TIGR02780 | 0 | 97 0 0   | 0 0 | 0 0 | 0 0 | 0 0 | 0 0 | 29.77 |
| TIGR02786 | 0 | 64 0 0   | 0 0 | 0 0 | 0 0 | 0 0 | 0 0 | 34.36 |
| TIGR02794 | 0 | 46 0 0   | 0 0 | 0 0 | 0 0 | 0 0 | 0 0 | 17.41 |
| TIGR02811 | 0 | 56 0 0   | 0 0 | 0 0 | 0 0 | 0 0 | 0 0 | 37.83 |
| TIGR02826 | 0 | 13 0 0   | 0 0 | 0 0 | 0 0 | 0 0 | 0 0 | 38.39 |
| TIGR02830 | 0 | 41 0 0   | 0 0 | 0 0 | 0 0 | 0 0 | 0 0 | 39.72 |
| TIGR02853 | 0 | 3 0 0    | 0 0 | 0 0 | 0 0 | 0 0 | 0 0 | 54.59 |
| TIGR02889 | 0 | 29 0 0   | 0 0 | 0 0 | 0 0 | 0 0 | 0 0 | 49.98 |
| TIGR02894 | 0 | 55 0 0   | 0 0 | 0 0 | 0 0 | 0 0 | 0 0 | 50.11 |
| TIGR02905 | 0 | 22 0 0   | 0 0 | 0 0 | 0 0 | 0 0 | 0 0 | 63.92 |
| TIGR02910 | 0 | 34 0 0   | 0 0 | 0 0 | 0 0 | 0 0 | 0 0 | 58.25 |
| TIGR02949 | 0 | 55 0 0   | 0 0 | 0 0 | 0 0 | 0 0 | 0 0 | 37.02 |
| TIGR02953 | 0 | 53 0 0   | 0 0 | 0 0 | 0 0 | 0 0 | 0 0 | 43.8  |
| TIGR02968 | 0 | 13 0 0   | 0 0 | 0 0 | 0 0 | 0 0 | 0 0 | 47.67 |
| TIGR03016 | 0 | 8 0 0    | 0 0 | 0 0 | 0 0 | 0 0 | 0 0 | 10.58 |
| TIGR03019 | 0 | 5 0 0    | 0 0 | 0 0 | 0 0 | 0 0 | 0 0 | 29.96 |
| TIGR03034 | 0 | 3 0 0    | 0 0 | 0 0 | 0 0 | 0 0 | 0 0 | 99.37 |
| TIGR03042 | 0 | 13 0 0   | 0 0 | 0 0 | 0 0 | 0 0 | 0 0 | 33.29 |
| TIGR03044 | 0 | 35 0 0   | 0 0 | 0 0 | 0 0 | 0 0 | 0 0 | 46.43 |
| TIGR03058 | 0 | 16 0 0   | 0 0 | 0 0 | 0 0 | 0 0 | 0 0 | 61.53 |
| TIGR03071 | 0 | 20 0 0   | 0 0 | 0 0 | 0 0 | 0 0 | 0 0 | 33.11 |
| TIGR03076 | 0 | 5 0 0    | 0 0 | 0 0 | 0 0 | 0 0 | 0 0 | 82.11 |
| TIGR03085 | 0 | 15 0 0   | 0 0 | 0 0 | 0 0 | 0 0 | 0 0 | 39.71 |
| TIGR03087 | 0 | 3 0 0    | 0 0 | 0 0 | 0 0 | 0 0 | 0 0 | 42.43 |
| TIGR03089 | 0 | 28 0 0   | 0 0 | 0 0 | 0 0 | 0 0 | 0 0 | 37.34 |
| TIGR03090 | 0 | 29 0 0   | 0 0 | 0 0 | 0 0 | 0 0 | 0 0 | 53.33 |
| TIGR03092 | 0 | 10 0 0   | 0 0 | 0 0 | 0 0 | 0 0 | 0 0 | 48.86 |
| TIGR03100 | 0 | 9 0 0    | 0 0 | 0 0 | 0 0 | 0 0 | 0 0 | 35.5  |
| TIGR03101 | 0 | 7 0 0    | 0 0 | 0 0 | 0 0 | 0 0 | 0 0 | 36.11 |
| TIGR03110 | 0 | 3 0 0    | 0 0 | 0 0 | 0 0 | 0 0 | 0 0 | 52.13 |
| TIGR03116 | 0 | 3 0 0    | 0 0 | 0 0 | 0 0 | 0 0 | 0 0 | 25.76 |
| TIGR03123 | 0 | 11 0 0   | 0 0 | 0 0 | 0 0 | 0 0 | 0 0 | 37.07 |
| TIGR03131 | 0 | 3 0 0    | 0 0 | 0 0 | 0 0 | 0 0 | 0 0 | 95.93 |
| TIGR03133 | 0 | 3 0 0    | 0 0 | 0 0 | 0 0 | 0 0 | 0 0 | 71.96 |
| TIGR03149 | 0 | 6 0 0    | 0 0 | 0 0 | 0 0 | 0 0 | 0 0 | 87.48 |
| TIGR03155 | 0 | 8 0 0    | 0 0 | 0 0 | 0 0 | 0 0 | 0 0 | 81.56 |
| TIGR03159 | 0 | 16 0 0   | 0 0 | 0 0 | 0 0 | 0 0 | 0 0 | 31.57 |
| TIGR03172 | 0 | 60 0 0   | 0 0 | 0 0 | 0 0 | 0 0 | 0 0 | 33.62 |
| TIGR03174 | 0 | 12 0 0   | 0 0 | 0 0 | 0 0 | 0 0 | 0 0 | 23.49 |
| TIGR03177 | 0 | 35 0 0   | 0 0 | 0 0 | 0 0 | 0 0 | 0 0 | 14.61 |
| TIGR03185 | 0 | 30 0 0   | 0 0 | 0 0 | 0 0 | 0 0 | 0 0 | 21.34 |
| TIGR03233 | 0 | 24 0 0   | 0 0 | 0 0 | 0 0 | 0 0 | 0 0 | 48.1  |
| TIGR03238 | 0 | 8 0 0    | 0 0 | 0 0 | 0 0 | 0 0 | 0 0 | 40.25 |
| TIGR03276 | 0 | 18 0 0   | 0 0 | 0 0 | 0 0 | 0 0 | 0 0 | 59.26 |
| TIGR03281 | 0 | 5 0 0    | 0 0 | 0 0 | 0 0 | 0 0 | 0 0 | 65.38 |
| TIGR03300 | 0 | 19 0 0   | 0 0 | 0 0 | 0 0 | 0 0 | 0 0 | 31.51 |
| TIGR03302 | 0 | 335 0 0  | 0 0 | 0 0 | 0 0 | 0 0 | 0 0 | 21.3  |
| TIGR03307 | 0 | 24 0 0   | 0 0 | 0 0 | 0 0 | 0 0 | 0 0 | 89.54 |
| TIGR03308 | 0 | 38 0 0   | 0 0 | 0 0 | 0 0 | 0 0 | 0 0 | 52.81 |
| TIGR03318 | 0 | 52 0 0   | 0 0 | 0 0 | 0 0 | 0 0 | 0 0 | 68.54 |
| TIGR03352 | 0 | 150 0 0  | 0 0 | 0 0 | 0 0 | 0 0 | 0 0 | 21.78 |
| TIGR03354 | 0 | 27 0 0   | 0 0 | 0 0 | 0 0 | 0 0 | 0 0 | 61.76 |
| TIGR03368 | 0 | 5 0 0    | 0 0 | 0 0 | 0 0 | 0 0 | 0 0 | 83.52 |
| TIGR03401 | 0 | 4 0 0    | 0 0 | 0 0 | 0 0 | 0 0 | 0 0 | 45.69 |
| TIGR03420 | 0 | 5 0 0    | 0 0 | 0 0 | 0 0 | 0 0 | 0 0 | 33.66 |
| TIGR03426 | 0 | 15 0 0   | 0 0 | 0 0 | 0 0 | 0 0 | 0 0 | 14.57 |
| TIGR03427 | 0 | 5 0 0    | 0 0 | 0 0 | 0 0 | 0 0 | 0 0 | 51.59 |
| TIGR03431 | 0 | 86 0 0   | 0 0 | 0 0 | 0 0 | 0 0 | 0 0 | 42.78 |
| TIGR03442 | 0 | 12 0 0   | 0 0 | 0 0 | 0 0 | 0 0 | 0 0 | 36.58 |
| TIGR03459 | 0 | 17 0 0   | 0 0 | 0 0 | 0 0 | 0 0 | 0 0 | 75.06 |
| TIGR03472 | 0 | 11 0 0   | 0 0 | 0 0 | 0 0 | 0 0 | 0 0 | 40.57 |
| TIGR03478 | 0 | 10 0 0   | 0 0 | 0 0 | 0 0 | 0 0 | 0 0 | 64.27 |
| TIGR03490 | 0 | 6 0 0    | 0 0 | 0 0 | 0 0 | 0 0 | 0 0 | 34.93 |
| TIGR03492 | 0 | 59 0 0   | 0 0 | 0 0 | 0 0 | 0 0 | 0 0 | 30.14 |
| TIGR03493 | 0 | 6 0 0    | 0 0 | 0 0 | 0 0 | 0 0 | 0 0 | 71.95 |
| TIGR03495 | 0 | 32 0 0   | 0 0 | 0 0 | 0 0 | 0 0 | 0 0 | 34.59 |
| TIGR03503 | 0 | 34 0 0   | 0 0 | 0 0 | 0 0 | 0 0 | 0 0 | 39.49 |
| TIGR03506 | 0 | 4 0 0    | 0 0 | 0 0 | 0 0 | 0 0 | 0 0 | 27.02 |
| TIGR03510 | 0 | 30 0 0   | 0 0 | 0 0 | 0 0 | 0 0 | 0 0 | 44.85 |
| TIGR03511 | 0 | 14 0 0   | 0 0 | 0 0 | 0 0 | 0 0 | 0 0 | 24.56 |
| TIGR03512 | 0 | 10 0 0   | 0 0 | 0 0 | 0 0 | 0 0 | 0 0 | 41.18 |
| TIGR03513 | 0 | 16 0 0   | 0 0 | 0 0 | 0 0 | 0 0 | 0 0 | 36.16 |
| TIGR03515 | 0 | 10 0 0   | 0 0 | 0 0 | 0 0 | 0 0 | 0 0 | 47.83 |
| TIGR03517 | 0 | 3 0 0    | 0 0 | 0 0 | 0 0 | 0 0 | 0 0 | 20.21 |
| TIGR03518 | 0 | 11 0 0   | 0 0 | 0 0 | 0 0 | 0 0 | 0 0 | 50.19 |
| TIGR03519 | 0 | 14 0 0   | 0 0 | 0 0 | 0 0 | 0 0 | 0 0 | 20.1  |
| TIGR03523 | 0 | 16 0 0   | 0 0 | 0 0 | 0 0 | 0 0 | 0 0 | 24.72 |
| TIGR03536 | 0 | 35 0 0   | 0 0 | 0 0 | 0 0 | 0 0 | 0 0 | 72.11 |
| TIGR03543 | 0 | 18 0 0   | 0 0 | 0 0 | 0 0 | 0 0 | 0 0 | 36.91 |
| TIGR03552 | 0 | 10 0 0   | 0 0 | 0 0 | 0 0 | 0 0 | 0 0 | 38.16 |
| TIGR03570 | 0 | 102 0 0  | 0 0 | 0 0 | 0 0 | 0 0 | 0 0 | 21.5  |
| TIGR03573 | 0 | 37 0 0   | 0 0 | 0 0 | 0 0 | 0 0 | 0 0 | 27.05 |
| TIGR03577 | 0 | 29 0 0   | 0 0 | 0 0 | 0 0 | 0 0 | 0 0 | 82.92 |
| TIGR03578 | 0 | 29 0 0   | 0 0 | 0 0 | 0 0 | 0 0 | 0 0 | 66.3  |
| TIGR03579 | 0 | 29 0 0   | 0 0 | 0 0 | 0 0 | 0 0 | 0 0 | 89.32 |
| TIGR03580 | 0 | 29 0 0   | 0 0 | 0 0 | 0 0 | 0 0 | 0 0 | 87.23 |
| TIGR03582 | 0 | 3 0 0    | 0 0 | 0 0 | 0 0 | 0 0 | 0 0 | 93.05 |
| TIGR03583 | 0 | 3 0 0    | 0 0 | 0 0 | 0 0 | 0 0 | 0 0 | 46.62 |
| TIGR03587 | 0 | 3 0 0    | 0 0 | 0 0 | 0 0 | 0 0 | 0 0 | 63.74 |
| TIGR03601 | 0 | 19 0 0   | 0 0 | 0 0 | 0 0 | 0 0 | 0 0 | 90.01 |
| TIGR03602 | 0 | 17 0 0   | 0 0 | 0 0 | 0 0 | 0 0 | 0 0 | 67.79 |
| TIGR03603 | 0 | 18 0 0   | 0 0 | 0 0 | 0 0 | 0 0 | 0 0 | 52.07 |
| TIGR03620 | 0 | 4 0 0    | 0 0 | 0 0 | 0 0 | 0 0 | 0 0 | 41.38 |
| TIGR03623 | 0 | 29 0 0   | 0 0 | 0 0 | 0 0 | 0 0 | 0 0 | 23.3  |
| TIGR03647 | 0 | 139 0 0  | 0 0 | 0 0 | 0 0 | 0 0 | 0 0 | 42.31 |
| TIGR03649 | 0 | 4 0 0    | 0 0 | 0 0 | 0 0 | 0 0 | 0 0 | 49.14 |
| IPR000054 | 1 | 161 0 0  | 0 0 | 0 0 | 0 0 | 1 1 | 0 0 | 43.55 |
| IPR000079 | 1 | 55 0 0   | 0 0 | 0 0 | 0 0 | 1 1 | 0 0 | 52.35 |
| IPR000131 | 1 | 926 1 1  | 0 0 | 0 0 | 0 0 | 0 0 | 0 0 | 29.99 |
| IPR000167 | 1 | 80 0 0   | 0 0 | 0 0 | 0 0 | 1 1 | 0 0 | 30.72 |
| IPR000200 | 1 | 23 1 1   | 0 0 | 0 0 | 0 0 | 0 0 | 0 0 | 30.78 |
| IPR000238 | 1 | 793 0 0  | 0 0 | 1 1 | 0 0 | 0 0 | 0 0 | 27.29 |
| IPR000260 | 1 | 418 1 0  | 1 0 | 0 0 | 0 0 | 0 0 | 1 0 | 29.69 |
| IPR000289 | 1 | 148 0 0  | 0 0 | 0 0 | 0 0 | 1 1 | 0 0 | 56.39 |
| IPR000290 | 1 | 58 1 1   | 0 0 | 0 0 | 0 0 | 0 0 | 0 0 | 40.77 |
| IPR000298 | 1 | 1275 2 1 | 0 0 | 1 0 | 0 0 | 0 0 | 0 0 | 24.78 |
| IPR000308 | 1 | 394 0 0  | 0 0 | 1 1 | 0 0 | 0 0 | 0 0 | 43.47 |
| IPR000358 | 1 | 918 1 1  | 0 0 | 0 0 | 0 0 | 0 0 | 0 0 | 19.77 |
| IPR000389 | 1 | 38 1 1   | 0 0 | 0 0 | 0 0 | 0 0 | 0 0 | 44.64 |
| IPR000397 | 1 | 517 1 1  | 0 0 | 0 0 | 0 0 | 0 0 | 0 0 | 26.95 |
| IPR000406 | 1 | 114 0 0  | 0 0 | 0 0 | 0 0 | 1 1 | 0 0 | 38.97 |
| IPR000417 | 1 | 358 1 0  | 0 0 | 0 0 | 0 0 | 0 0 | 0 0 | 34.2  |
| IPR000424 | 1 | 1704 1 1 | 0 0 | 0 0 | 0 0 | 1 1 | 0 0 | 21.47 |
| IPR000456 | 1 | 858 1 1  | 0 0 | 0 0 | 0 0 | 0 0 | 0 0 | 44.17 |
| IPR000465 | 1 | 106 0 0  | 0 0 | 0 0 | 0 0 | 1 1 | 0 0 | 26.26 |
| IPR000468 | 1 | 190 1 1  | 0 0 | 0 0 | 0 0 | 0 0 | 0 0 | 12.49 |

|           |   |          |     |     |     |     |     |       |
|-----------|---|----------|-----|-----|-----|-----|-----|-------|
| IPR000525 | 1 | 235 1 1  | 0 0 | 0 0 | 0 0 | 0 0 | 0 0 | 10.29 |
| IPR000529 | 1 | 843 0 0  | 0 0 | 1 1 | 0 0 | 0 0 | 0 0 | 28.41 |
| IPR000552 | 1 | 142 0 0  | 0 0 | 0 0 | 0 0 | 1 1 | 0 0 | 49.85 |
| IPR000554 | 1 | 117 0 0  | 0 0 | 1 1 | 0 0 | 0 0 | 0 0 | 53.94 |
| IPR000557 | 1 | 300 0 0  | 0 0 | 0 0 | 0 0 | 0 0 | 2 2 | 49.9  |
| IPR000592 | 1 | 162 1 1  | 0 0 | 0 0 | 0 0 | 0 0 | 0 0 | 53.66 |
| IPR000605 | 1 | 17 1 1   | 0 0 | 0 0 | 0 0 | 0 0 | 0 0 | 30.97 |
| IPR000630 | 1 | 964 0 0  | 0 0 | 0 0 | 0 0 | 0 0 | 1 1 | 40.38 |
| IPR000638 | 1 | 125 1 1  | 0 0 | 0 0 | 0 0 | 0 0 | 0 0 | 54.99 |
| IPR000663 | 1 | 44 0 0   | 0 0 | 0 0 | 0 0 | 0 0 | 1 1 | 28.06 |
| IPR000687 | 1 | 126 0 0  | 0 0 | 0 0 | 0 0 | 0 0 | 1 1 | 48.38 |
| IPR000730 | 1 | 329 0 0  | 0 0 | 0 0 | 0 0 | 1 1 | 0 0 | 14.84 |
| IPR000744 | 1 | 136 1 1  | 0 0 | 0 0 | 0 0 | 0 0 | 0 0 | 23.73 |
| IPR000751 | 1 | 25 0 0   | 0 0 | 0 0 | 0 0 | 0 0 | 1 1 | 36.25 |
| IPR000787 | 1 | 328 1 1  | 0 0 | 0 0 | 0 0 | 0 0 | 0 0 | 21.68 |
| IPR000791 | 1 | 314 0 0  | 0 0 | 0 0 | 0 0 | 0 0 | 1 1 | 24.66 |
| IPR000802 | 1 | 289 0 0  | 0 0 | 0 0 | 0 0 | 1 1 | 0 0 | 29.8  |
| IPR000816 | 1 | 299 0 0  | 0 0 | 0 0 | 0 0 | 0 0 | 0 0 | 25.9  |
| IPR000817 | 1 | 59 0 0   | 0 0 | 0 0 | 0 0 | 0 0 | 1 1 | 88.75 |
| IPR000903 | 1 | 208 1 1  | 0 0 | 0 0 | 0 0 | 0 0 | 0 0 | 27.24 |
| IPR000928 | 1 | 72 0 0   | 0 0 | 1 0 | 0 0 | 1 0 | 0 0 | 31.61 |
| IPR000975 | 1 | 119 0 0  | 0 0 | 0 0 | 0 0 | 0 0 | 1 1 | 19.2  |
| IPR001023 | 1 | 14 0 0   | 0 0 | 1 1 | 0 0 | 0 0 | 0 0 | 11.64 |
| IPR001050 | 1 | 67 0 0   | 0 0 | 0 0 | 0 0 | 0 0 | 1 1 | 26.8  |
| IPR001084 | 1 | 198 0 0  | 0 0 | 0 0 | 0 0 | 0 0 | 1 1 | 51.17 |
| IPR001088 | 1 | 400 1 1  | 0 0 | 0 0 | 0 0 | 0 0 | 0 0 | 24.67 |
| IPR001124 | 1 | 114 0 0  | 0 0 | 0 0 | 0 0 | 1 0 | 0 0 | 15.18 |
| IPR001132 | 1 | 230 0 0  | 0 0 | 0 0 | 0 0 | 0 0 | 1 1 | 45.1  |
| IPR001141 | 1 | 112 0 0  | 0 0 | 1 0 | 1 0 | 1 0 | 1 0 | 50.51 |
| IPR001152 | 1 | 128 0 0  | 0 0 | 0 0 | 0 0 | 0 0 | 1 1 | 53.79 |
| IPR001153 | 1 | 27 0 0   | 0 0 | 1 1 | 0 0 | 0 0 | 0 0 | 75.81 |
| IPR001209 | 1 | 1041 0 0 | 0 0 | 1 1 | 0 0 | 0 0 | 0 0 | 38.35 |
| IPR001253 | 1 | 148 0 0  | 0 0 | 1 1 | 0 0 | 0 0 | 0 0 | 56.78 |
| IPR001267 | 1 | 429 0 0  | 0 0 | 1 1 | 0 0 | 0 0 | 0 0 | 29.43 |
| IPR001377 | 1 | 173 0 0  | 0 0 | 1 1 | 0 0 | 0 0 | 0 0 | 46.77 |
| IPR001380 | 1 | 130 0 0  | 1 1 | 0 0 | 0 0 | 0 0 | 0 0 | 45.45 |
| IPR001415 | 1 | 38 0 0   | 0 0 | 0 0 | 0 0 | 0 0 | 1 1 | 48.84 |
| IPR001421 | 1 | 148 0 0  | 0 0 | 0 0 | 0 0 | 1 1 | 0 0 | 48.51 |
| IPR001427 | 1 | 119 0 0  | 0 0 | 0 0 | 0 0 | 0 0 | 1 1 | 28.19 |
| IPR001437 | 1 | 2377 1 1 | 0 0 | 0 0 | 0 0 | 0 0 | 0 0 | 15.69 |
| IPR001442 | 1 | 159 0 0  | 0 0 | 0 0 | 0 0 | 0 0 | 1 1 | 46.23 |
| IPR001443 | 1 | 68 1 1   | 0 0 | 0 0 | 0 0 | 0 0 | 0 0 | 83.73 |
| IPR001463 | 1 | 789 1 1  | 0 0 | 0 0 | 0 0 | 0 0 | 0 0 | 37.6  |
| IPR001531 | 1 | 105 1 1  | 0 0 | 0 0 | 0 0 | 0 0 | 0 0 | 26.79 |
| IPR001569 | 1 | 142 0 0  | 0 0 | 0 0 | 0 0 | 1 1 | 0 0 | 62.31 |
| IPR001684 | 1 | 842 0 0  | 0 0 | 1 1 | 0 0 | 0 0 | 1 1 | 55.23 |
| IPR001689 | 1 | 403 1 1  | 0 0 | 0 0 | 0 0 | 0 0 | 0 0 | 25.64 |
| IPR001698 | 1 | 94 0 0   | 0 0 | 0 0 | 1 1 | 0 0 | 0 0 | 59.02 |
| IPR001707 | 1 | 93 1 1   | 0 0 | 0 0 | 0 0 | 0 0 | 0 0 | 31.43 |
| IPR001712 | 1 | 612 1 1  | 0 0 | 0 0 | 0 0 | 0 0 | 0 0 | 39.63 |
| IPR001722 | 1 | 35 0 0   | 0 0 | 0 0 | 0 0 | 1 1 | 0 0 | 58.69 |
| IPR001737 | 1 | 204 1 1  | 0 0 | 0 0 | 0 0 | 0 0 | 0 0 | 13.25 |
| IPR001748 | 1 | 91 0 0   | 0 0 | 0 0 | 0 0 | 0 0 | 1 1 | 65.3  |
| IPR001782 | 1 | 372 0 0  | 0 0 | 1 1 | 0 0 | 0 0 | 0 0 | 44.79 |
| IPR001800 | 1 | 40 1 1   | 0 0 | 0 0 | 0 0 | 0 0 | 0 0 | 49.65 |
| IPR001820 | 1 | 91 1 1   | 0 0 | 0 0 | 0 0 | 0 0 | 0 0 | 33.52 |
| IPR001848 | 1 | 1019 0 0 | 0 0 | 0 0 | 0 0 | 1 1 | 1 1 | 35.73 |
| IPR001850 | 1 | 14 2 2   | 0 0 | 0 0 | 0 0 | 0 0 | 0 0 | 26.59 |
| IPR001893 | 1 | 365 0 0  | 0 0 | 2 1 | 0 0 | 0 0 | 1 0 | 19.13 |
| IPR001894 | 1 | 48 0 0   | 0 0 | 0 0 | 0 0 | 0 0 | 1 1 | 54.3  |
| IPR001912 | 1 | 976 1 0  | 0 0 | 1 0 | 1 0 | 0 0 | 1 1 | 81.82 |
| IPR001925 | 1 | 324 0 0  | 0 0 | 1 1 | 0 0 | 0 0 | 0 0 | 11.46 |
| IPR001930 | 1 | 12 1 0   | 0 0 | 0 0 | 0 0 | 0 0 | 1 0 | 12.51 |
| IPR001978 | 1 | 245 0 0  | 0 0 | 0 0 | 0 0 | 0 0 | 1 1 | 26.13 |
| IPR002033 | 1 | 706 1 1  | 0 0 | 0 0 | 0 0 | 0 0 | 0 0 | 30.09 |
| IPR002085 | 1 | 34 0 0   | 0 0 | 0 0 | 0 0 | 1 1 | 0 0 | 6.04  |
| IPR002087 | 1 | 89 0 0   | 0 0 | 0 0 | 0 0 | 1 1 | 0 0 | 46.97 |
| IPR002097 | 1 | 172 0 0  | 0 0 | 1 1 | 0 0 | 0 0 | 0 0 | 21.69 |
| IPR002099 | 1 | 11 0 0   | 0 0 | 0 0 | 0 0 | 0 0 | 1 1 | 12.86 |
| IPR002136 | 1 | 1000 0 0 | 0 0 | 1 1 | 1 1 | 0 0 | 0 0 | 28.06 |
| IPR002150 | 1 | 885 0 0  | 0 0 | 1 1 | 0 0 | 0 0 | 0 0 | 42.95 |
| IPR002160 | 1 | 49 0 0   | 0 0 | 1 1 | 0 0 | 0 0 | 0 0 | 29.34 |
| IPR002171 | 1 | 1961 0 0 | 0 0 | 0 0 | 0 0 | 1 1 | 0 0 | 28.1  |
| IPR002191 | 1 | 580 0 0  | 0 0 | 1 1 | 0 0 | 0 0 | 0 0 | 38.75 |
| IPR002472 | 1 | 141 0 0  | 0 0 | 0 0 | 0 0 | 1 1 | 0 0 | 31.43 |
| IPR002516 | 1 | 139 1 1  | 0 0 | 0 0 | 0 0 | 0 0 | 0 0 | 19.71 |
| IPR002566 | 1 | 231 1 1  | 0 0 | 0 0 | 0 0 | 0 0 | 0 0 | 18.42 |
| IPR002583 | 1 | 762 0 0  | 0 0 | 1 1 | 0 0 | 0 0 | 0 0 | 34.16 |
| IPR002587 | 1 | 274 1 1  | 0 0 | 0 0 | 0 0 | 0 0 | 0 0 | 28.71 |
| IPR002615 | 1 | 50 1 1   | 0 0 | 0 0 | 0 0 | 0 0 | 0 0 | 55.97 |
| IPR002631 | 1 | 18 1 1   | 0 0 | 0 0 | 0 0 | 0 0 | 0 0 | 21.38 |
| IPR002661 | 1 | 843 0 0  | 0 0 | 0 0 | 0 0 | 1 1 | 0 0 | 42.21 |
| IPR002674 | 1 | 136 0 0  | 0 0 | 0 0 | 0 0 | 1 1 | 0 0 | 52.96 |
| IPR002678 | 1 | 703 0 0  | 0 0 | 0 0 | 0 0 | 1 1 | 0 0 | 19.62 |
| IPR002683 | 1 | 175 1 1  | 0 0 | 0 0 | 0 0 | 0 0 | 0 0 | 16.84 |
| IPR002691 | 1 | 63 0 0   | 0 0 | 0 0 | 0 0 | 0 0 | 1 1 | 44.41 |
| IPR002699 | 1 | 255 0 0  | 0 0 | 0 0 | 0 0 | 0 0 | 0 0 | 22.68 |
| IPR002724 | 1 | 71 1 1   | 0 0 | 0 0 | 0 0 | 0 0 | 0 0 | 28.17 |
| IPR002726 | 1 | 53 1 1   | 0 0 | 0 0 | 0 0 | 0 0 | 0 0 | 31.57 |
| IPR002747 | 1 | 225 1 1  | 0 0 | 0 0 | 0 0 | 0 0 | 0 0 | 29.76 |
| IPR002767 | 1 | 314 1 1  | 0 0 | 0 0 | 0 0 | 0 0 | 0 0 | 25.4  |
| IPR002784 | 1 | 126 0 0  | 1 0 | 0 0 | 1 0 | 1 0 | 1 0 | 30.66 |
| IPR002786 | 1 | 160 0 0  | 0 0 | 0 0 | 0 0 | 0 0 | 0 0 | 35.45 |
| IPR002794 | 1 | 176 1 1  | 0 0 | 0 0 | 0 0 | 0 0 | 0 0 | 23.72 |
| IPR002809 | 1 | 33 0 0   | 0 0 | 0 0 | 0 0 | 0 0 | 1 1 | 27.47 |
| IPR002830 | 1 | 563 2 2  | 0 0 | 0 0 | 0 0 | 0 0 | 0 0 | 25.58 |
| IPR002835 | 1 | 88 1 1   | 0 0 | 0 0 | 0 0 | 0 0 | 0 0 | 17.5  |
| IPR002840 | 1 | 68 1 0   | 1 0 | 0 0 | 0 0 | 1 0 | 0 0 | 40.05 |
| IPR002846 | 1 | 41 1 0   | 1 0 | 0 0 | 0 0 | 0 0 | 0 0 | 30.21 |
| IPR002853 | 1 | 38 0 0   | 0 0 | 0 0 | 0 0 | 0 0 | 1 1 | 41.4  |
| IPR002856 | 1 | 27 0 0   | 1 1 | 0 0 | 0 0 | 0 0 | 0 0 | 41.03 |
| IPR002864 | 1 | 253 0 0  | 0 0 | 1 1 | 0 0 | 0 0 | 0 0 | 13.07 |
| IPR002866 | 1 | 12 0 0   | 0 0 | 1 1 | 0 0 | 0 0 | 0 0 | 63.24 |
| IPR002876 | 1 | 912 0 0  | 0 0 | 0 0 | 0 0 | 0 0 | 1 1 | 37.8  |
| IPR002906 | 1 | 149 0 0  | 0 0 | 1 0 | 1 0 | 1 0 | 1 0 | 57.13 |
| IPR002993 | 1 | 60 0 0   | 0 0 | 0 0 | 0 0 | 1 1 | 0 0 | 18.77 |
| IPR003021 | 1 | 83 0 0   | 0 0 | 0 0 | 0 0 | 0 0 | 1 1 | 21.84 |
| IPR003090 | 1 | 43 0 0   | 0 0 | 0 0 | 0 0 | 1 1 | 0 0 | 44.37 |
| IPR003093 | 1 | 37 0 0   | 0 0 | 0 0 | 0 0 | 0 0 | 1 1 | 57.71 |
| IPR003154 | 1 | 136 0 0  | 0 0 | 1 1 | 0 0 | 0 0 | 0 0 | 17.82 |
| IPR003158 | 1 | 26 1 1   | 0 0 | 0 0 | 0 0 | 0 0 | 0 0 | 27.73 |
| IPR003172 | 1 | 267 0 0  | 0 0 | 0 0 | 0 0 | 0 0 | 1 1 | 13.53 |
| IPR003183 | 1 | 21 0 0   | 1 1 | 0 0 | 0 0 | 0 0 | 0 0 | 70.18 |
| IPR003185 | 1 | 57 0 0   | 0 0 | 0 0 | 0 0 | 1 0 | 1 0 | 41.19 |
| IPR003186 | 1 | 69 0 0   | 0 0 | 0 0 | 0 0 | 1 0 | 1 0 | 46.13 |
| IPR003188 | 1 | 407 1 1  | 0 0 | 0 0 | 0 0 | 0 0 | 0 0 | 37.94 |
| IPR003195 | 1 | 129 0 0  | 0 0 | 0 0 | 0 0 | 0 0 | 1 1 | 34.18 |
| IPR003196 | 1 | 96 0 0   | 0 0 | 0 0 | 0 0 | 0 0 | 1 1 | 28.55 |
| IPR003201 | 1 | 55 1 1   | 0 0 | 0 0 | 0 0 | 0 0 | 0 0 | 38.81 |
| IPR003204 | 1 | 60 0 0   | 0 0 | 0 0 | 0 0 | 0 0 | 1 1 | 50.38 |
| IPR003206 | 1 | 52 1 1   | 0 0 | 0 0 | 0 0 | 0 0 | 0 0 | 71.56 |
| IPR003208 | 1 | 64 1 1   | 0 0 | 0 0 | 0 0 | 0 0 | 0 0 | 46.89 |
| IPR003210 | 1 | 69 0 0   | 0 0 | 0 0 | 0 0 | 0 0 | 1 1 | 31.08 |
| IPR003222 | 1 | 113 1 1  | 0 0 | 0 0 | 0 0 | 0 0 | 0 0 | 23.17 |
| IPR003317 | 1 | 791 1 0  | 0 0 | 1 0 | 0 0 | 0 0 | 0 0 | 27.5  |
| IPR003319 | 1 | 25 0 0   | 0 0 | 1 1 | 0 0 | 0 0 | 0 0 | 35.14 |
| IPR003393 | 1 | 7 0 0    | 0 0 | 1 1 | 0 0 | 0 0 | 0 0 | 40.32 |
| IPR003394 | 1 | 88 1 1   | 0 0 | 0 0 | 0 0 | 0 0 | 0 0 | 19.61 |
| IPR003400 | 1 | 1457 1 1 | 0 0 | 0 0 | 0 0 | 0 0 | 0 0 | 21.67 |
| IPR003413 | 1 | 194 1 1  | 0 0 | 0 0 | 0 0 | 0 0 | 0 0 | 17.51 |
| IPR003414 | 1 | 545 1 1  | 0 0 | 0 0 | 0 0 | 0 0 | 0 0 | 39.26 |
| IPR003425 | 1 | 928 0 0  | 0 0 | 1 1 | 0 0 | 0 0 | 0 0 | 23.16 |
| IPR003430 | 1 | 118 1 1  | 0 0 | 0 0 | 0 0 | 0 0 | 0 0 | 16.1  |
| IPR003453 | 1 | 960 1 1  | 0 0 | 0 0 | 0 0 | 0 0 | 0 0 | 27.15 |
| IPR003469 | 1 | 42 1 1   | 0 0 | 0 0 | 0 0 | 0 0 | 0 0 | 45.2  |
| IPR003473 | 1 | 612 0 0  | 0 0 | 1 1 | 0 0 | 0 0 | 0 0 | 36.86 |
| IPR003482 | 1 | 400 1 1  | 0 0 | 0 0 | 0 0 | 0 0 | 0 0 | 37.38 |
| IPR003484 | 1 | 18 1 1   | 0 0 | 0 0 | 0 0 | 0 0 | 0 0 | 55.31 |
| IPR003502 | 1 | 45 0 0   | 0 0 | 0 0 | 0 0 | 0 0 | 1 1 | 36.92 |
| IPR003506 | 1 | 6 1 1    | 0 0 | 0 0 | 0 0 | 0 0 | 0 0 | 93.73 |
| IPR003540 | 1 | 12 1 1   | 0 0 | 0 0 | 0 0 | 0 0 | 0 0 | 44.74 |
| IPR003611 | 1 | 17 1 1   | 0 0 | 0 0 | 0 0 | 0 0 | 0 0 | 50.4  |
| IPR003650 | 1 | 71 0 0   | 0 0 | 0 0 | 0 0 | 1 1 | 0 0 | 23.48 |
| IPR003667 | 1 | 746 1 1  | 0 0 | 0 0 | 0 0 | 0 0 | 0 0 | 34.55 |
| IPR003683 | 1 | 44 0 0   | 0 0 | 1 1 | 0 0 | 0 0 | 0 0 | 70.54 |
| IPR003684 | 1 | 219 1 1  | 0 0 | 0 0 |     |     |     |       |

|           |   |          |     |     |     |     |     |       |
|-----------|---|----------|-----|-----|-----|-----|-----|-------|
| IPR003708 | 1 | 378 0 0  | 0 0 | 0 0 | 0 0 | 0 0 | 0 0 | 32.79 |
| IPR003712 | 1 | 160 0 0  | 0 0 | 1 1 | 0 0 | 0 0 | 0 0 | 58.59 |
| IPR003713 | 1 | 395 1 1  | 0 0 | 0 0 | 0 0 | 0 0 | 0 0 | 24.96 |
| IPR003717 | 1 | 675 1 1  | 0 0 | 0 0 | 0 0 | 1 0 | 0 0 | 9.61  |
| IPR003730 | 1 | 646 1 1  | 0 0 | 0 0 | 0 0 | 0 0 | 0 0 | 28.1  |
| IPR003735 | 1 | 746 1 1  | 0 0 | 0 0 | 0 0 | 0 0 | 0 0 | 29.7  |
| IPR003740 | 1 | 1698 1 0 | 1 0 | 0 0 | 0 0 | 0 0 | 0 0 | 13.01 |
| IPR003742 | 1 | 598 0 0  | 0 0 | 1 1 | 0 0 | 0 0 | 0 0 | 31.29 |
| IPR003750 | 1 | 101 0 0  | 0 0 | 0 0 | 1 1 | 0 0 | 0 0 | 30.99 |
| IPR003751 | 1 | 359 1 1  | 0 0 | 0 0 | 0 0 | 0 0 | 0 0 | 46.67 |
| IPR003757 | 1 | 55 1 1   | 0 0 | 0 0 | 0 0 | 0 0 | 0 0 | 47.56 |
| IPR003767 | 1 | 479 1 1  | 0 0 | 0 0 | 0 0 | 0 0 | 0 0 | 22.67 |
| IPR003770 | 1 | 674 1 1  | 0 0 | 0 0 | 0 0 | 0 0 | 0 0 | 24.52 |
| IPR003775 | 1 | 140 1 1  | 0 0 | 0 0 | 0 0 | 0 0 | 0 0 | 25.13 |
| IPR003783 | 1 | 625 0 0  | 0 0 | 1 1 | 0 0 | 0 0 | 0 0 | 16.65 |
| IPR003784 | 1 | 439 1 1  | 0 0 | 0 0 | 0 0 | 0 0 | 0 0 | 25.28 |
| IPR003785 | 1 | 351 0 0  | 0 0 | 1 1 | 0 0 | 0 0 | 0 0 | 19.87 |
| IPR003791 | 1 | 350 1 1  | 0 0 | 0 0 | 0 0 | 0 0 | 0 0 | 32.21 |
| IPR003801 | 1 | 209 1 1  | 0 0 | 0 0 | 0 0 | 0 0 | 0 0 | 29.74 |
| IPR003802 | 1 | 244 1 1  | 0 0 | 0 0 | 0 0 | 0 0 | 0 0 | 33.97 |
| IPR003820 | 1 | 348 0 0  | 1 0 | 1 0 | 0 0 | 0 0 | 0 0 | 40.52 |
| IPR003826 | 1 | 359 1 1  | 0 0 | 0 0 | 0 0 | 0 0 | 0 0 | 31.68 |
| IPR003841 | 1 | 754 1 0  | 1 0 | 0 0 | 0 0 | 0 0 | 0 0 | 19.4  |
| IPR003844 | 1 | 263 0 0  | 0 0 | 1 1 | 0 0 | 0 0 | 0 0 | 46.1  |
| IPR003893 | 1 | 84 0 0   | 0 0 | 0 0 | 0 0 | 0 0 | 1 1 | 63.06 |
| IPR003930 | 1 | 28 0 0   | 0 0 | 0 0 | 0 0 | 0 0 | 1 1 | 37.47 |
| IPR003993 | 1 | 14 0 0   | 0 0 | 0 0 | 0 0 | 1 1 | 0 0 | 44.01 |
| IPR004011 | 1 | 426 0 0  | 0 0 | 0 0 | 0 0 | 0 0 | 1 1 | 75.36 |
| IPR004021 | 1 | 24 0 0   | 0 0 | 0 0 | 0 0 | 0 0 | 1 1 | 49.19 |
| IPR004023 | 1 | 89 0 0   | 0 0 | 1 1 | 0 0 | 0 0 | 0 0 | 73.35 |
| IPR004029 | 1 | 272 1 1  | 0 0 | 0 0 | 0 0 | 0 0 | 0 0 | 15.81 |
| IPR004060 | 1 | 10 0 0   | 0 0 | 0 0 | 0 0 | 1 1 | 0 0 | 80.42 |
| IPR004084 | 1 | 9 0 0    | 0 0 | 0 0 | 0 0 | 1 0 | 1 1 | 80.69 |
| IPR004130 | 1 | 392 0 0  | 1 1 | 0 0 | 0 0 | 0 0 | 0 0 | 21.25 |
| IPR004134 | 1 | 187 1 1  | 0 0 | 0 0 | 0 0 | 0 0 | 0 0 | 30.37 |
| IPR004142 | 1 | 162 1 1  | 0 0 | 0 0 | 0 0 | 0 0 | 0 0 | 35.44 |
| IPR004145 | 1 | 341 0 0  | 0 0 | 0 0 | 0 0 | 0 0 | 0 0 | 38.49 |
| IPR004156 | 1 | 254 0 0  | 0 0 | 0 0 | 0 0 | 0 0 | 1 1 | 26.86 |
| IPR004162 | 1 | 16 0 0   | 0 0 | 0 0 | 0 0 | 0 0 | 1 1 | 65.29 |
| IPR004184 | 1 | 556 1 0  | 1 0 | 1 0 | 0 0 | 0 0 | 0 0 | 24.84 |
| IPR004188 | 1 | 751 1 1  | 0 0 | 0 0 | 0 0 | 0 0 | 0 0 | 28.19 |
| IPR004190 | 1 | 22 1 1   | 0 0 | 0 0 | 0 0 | 0 0 | 0 0 | 52.69 |
| IPR004204 | 1 | 44 0 0   | 0 0 | 0 0 | 0 0 | 0 0 | 0 0 | 35.78 |
| IPR004215 | 1 | 372 1 1  | 0 0 | 0 0 | 0 0 | 0 0 | 0 0 | 33.62 |
| IPR004226 | 1 | 96 0 0   | 0 0 | 0 0 | 0 0 | 0 0 | 0 0 | 29.98 |
| IPR004241 | 1 | 188 0 0  | 0 0 | 1 1 | 0 0 | 0 0 | 0 0 | 57.5  |
| IPR004288 | 1 | 32 1 1   | 0 0 | 0 0 | 0 0 | 0 0 | 0 0 | 43.67 |
| IPR004289 | 1 | 4 0 0    | 0 0 | 1 1 | 0 0 | 0 0 | 0 0 | 66.67 |
| IPR004307 | 1 | 285 1 1  | 0 0 | 0 0 | 0 0 | 0 0 | 0 0 | 23    |
| IPR004313 | 1 | 222 0 0  | 0 0 | 1 1 | 0 0 | 0 0 | 0 0 | 27.96 |
| IPR004340 | 1 | 20 0 0   | 0 0 | 0 0 | 0 0 | 0 0 | 1 1 | 45.3  |
| IPR004341 | 1 | 265 1 1  | 0 0 | 0 0 | 0 0 | 0 0 | 0 0 | 37.58 |
| IPR004342 | 1 | 210 0 0  | 0 0 | 1 0 | 1 0 | 1 0 | 1 0 | 24.27 |
| IPR004349 | 1 | 16 1 1   | 0 0 | 0 0 | 0 0 | 0 0 | 0 0 | 46.98 |
| IPR004436 | 1 | 224 0 0  | 0 0 | 0 0 | 0 0 | 0 0 | 1 1 | 63.51 |
| IPR004516 | 1 | 166 0 0  | 0 0 | 0 0 | 0 0 | 0 0 | 1 1 | 20.4  |
| IPR004568 | 1 | 15 1 1   | 0 0 | 0 0 | 0 0 | 0 0 | 0 0 | 55.71 |
| IPR004579 | 1 | 73 0 0   | 0 0 | 1 0 | 0 0 | 0 0 | 1 0 | 53.88 |
| IPR004601 | 1 | 112 1 1  | 0 0 | 0 0 | 0 0 | 0 0 | 0 0 | 29.39 |
| IPR004603 | 1 | 197 1 1  | 0 0 | 0 0 | 0 0 | 0 0 | 0 0 | 45.34 |
| IPR004646 | 1 | 580 1 0  | 0 0 | 1 0 | 1 0 | 1 0 | 1 0 | 31.46 |
| IPR004658 | 1 | 148 1 1  | 0 0 | 0 0 | 0 0 | 0 0 | 0 0 | 37.9  |
| IPR004703 | 1 | 186 1 1  | 0 0 | 0 0 | 0 0 | 0 0 | 0 0 | 35.18 |
| IPR004711 | 1 | 239 1 1  | 0 0 | 0 0 | 0 0 | 0 0 | 0 0 | 38.75 |
| IPR004728 | 1 | 79 0 0   | 0 0 | 0 0 | 0 0 | 0 0 | 1 1 | 31.55 |
| IPR004761 | 1 | 384 1 1  | 0 0 | 0 0 | 0 0 | 0 0 | 0 0 | 12.49 |
| IPR004823 | 1 | 86 0 0   | 0 0 | 1 0 | 1 0 | 1 0 | 1 0 | 44.04 |
| IPR004830 | 1 | 99 1 1   | 0 0 | 0 0 | 0 0 | 0 0 | 0 0 | 29.89 |
| IPR004856 | 1 | 133 0 0  | 0 0 | 0 0 | 0 0 | 0 0 | 1 1 | 30.42 |
| IPR004882 | 1 | 150 0 0  | 0 0 | 0 0 | 0 0 | 0 0 | 1 1 | 35.03 |
| IPR004888 | 1 | 149 1 1  | 0 0 | 0 0 | 0 0 | 0 0 | 0 0 | 30.4  |
| IPR004889 | 1 | 15 0 0   | 1 1 | 0 0 | 0 0 | 0 0 | 0 0 | 48.9  |
| IPR004890 | 1 | 13 1 1   | 0 0 | 0 0 | 0 0 | 0 0 | 0 0 | 29.36 |
| IPR004895 | 1 | 241 0 0  | 0 0 | 0 0 | 0 0 | 0 0 | 1 1 | 15.58 |
| IPR004901 | 1 | 67 0 0   | 0 0 | 1 1 | 0 0 | 0 0 | 0 0 | 57.2  |
| IPR004925 | 1 | 182 1 0  | 1 0 | 0 0 | 0 0 | 0 0 | 0 0 | 19.96 |
| IPR004931 | 1 | 35 0 0   | 0 0 | 0 0 | 0 0 | 0 0 | 1 1 | 75.62 |
| IPR004934 | 1 | 90 0 0   | 0 0 | 0 0 | 0 0 | 0 0 | 1 1 | 39.65 |
| IPR004938 | 1 | 100 0 0  | 0 0 | 1 1 | 0 0 | 0 0 | 0 0 | 41.84 |
| IPR004942 | 1 | 444 1 1  | 0 0 | 0 0 | 0 0 | 0 0 | 0 0 | 13.05 |
| IPR004953 | 1 | 148 0 0  | 0 0 | 1 0 | 1 0 | 1 0 | 1 0 | 50.12 |
| IPR004960 | 1 | 917 1 1  | 0 0 | 0 0 | 0 0 | 0 0 | 0 0 | 12.29 |
| IPR004978 | 1 | 30 0 0   | 0 0 | 0 0 | 0 0 | 0 0 | 1 1 | 43.5  |
| IPR004984 | 1 | 11 1 1   | 0 0 | 0 0 | 0 0 | 0 0 | 0 0 | 22.89 |
| IPR005013 | 1 | 97 0 0   | 0 0 | 0 0 | 0 0 | 0 0 | 0 0 | 36.64 |
| IPR005017 | 1 | 499 1 1  | 0 0 | 0 0 | 0 0 | 0 0 | 0 0 | 12.59 |
| IPR005026 | 1 | 87 0 0   | 0 0 | 0 0 | 0 0 | 0 0 | 1 1 | 23.3  |
| IPR005027 | 1 | 187 0 0  | 0 0 | 2 2 | 0 0 | 0 0 | 0 0 | 31.56 |
| IPR005045 | 1 | 165 0 0  | 0 0 | 0 0 | 0 0 | 0 0 | 1 1 | 31.29 |
| IPR005089 | 1 | 7 0 0    | 0 0 | 0 0 | 0 0 | 1 1 | 0 0 | 46.13 |
| IPR005090 | 1 | 110 1 1  | 0 0 | 0 0 | 0 0 | 0 0 | 0 0 | 35.17 |
| IPR005109 | 1 | 86 0 0   | 0 0 | 0 0 | 0 0 | 0 0 | 1 1 | 42.93 |
| IPR005128 | 1 | 164 0 0  | 0 0 | 0 0 | 0 0 | 1 1 | 0 0 | 37    |
| IPR005133 | 1 | 393 1 1  | 0 0 | 0 0 | 0 0 | 0 0 | 0 0 | 24.64 |
| IPR005138 | 1 | 4 1 1    | 0 0 | 0 0 | 0 0 | 0 0 | 0 0 | 52.42 |
| IPR005143 | 1 | 464 1 0  | 1 0 | 0 0 | 0 0 | 0 0 | 7 5 | 7.5   |
| IPR005165 | 1 | 16 1 1   | 0 0 | 0 0 | 0 0 | 0 0 | 0 0 | 30.84 |
| IPR005173 | 1 | 48 0 0   | 0 0 | 0 0 | 0 0 | 0 0 | 1 1 | 52.07 |
| IPR005185 | 1 | 439 0 0  | 0 0 | 0 0 | 0 0 | 1 0 | 1 0 | 38.95 |
| IPR005224 | 1 | 330 1 1  | 0 0 | 0 0 | 0 0 | 0 0 | 0 0 | 31.82 |
| IPR005226 | 1 | 276 1 1  | 0 0 | 0 0 | 0 0 | 0 0 | 0 0 | 27.54 |
| IPR005234 | 1 | 554 0 0  | 0 0 | 1 1 | 0 0 | 0 0 | 0 0 | 31.09 |
| IPR005238 | 1 | 145 1 1  | 0 0 | 0 0 | 0 0 | 0 0 | 0 0 | 21.5  |
| IPR005297 | 1 | 287 1 1  | 0 0 | 0 0 | 0 0 | 0 0 | 0 0 | 27.56 |
| IPR005309 | 1 | 7 1 1    | 0 0 | 0 0 | 0 0 | 0 0 | 0 0 | 75.66 |
| IPR005310 | 1 | 6 1 1    | 0 0 | 0 0 | 0 0 | 0 0 | 0 0 | 66.91 |
| IPR005318 | 1 | 452 1 1  | 0 0 | 0 0 | 0 0 | 0 0 | 0 0 | 21.65 |
| IPR005333 | 1 | 174 0 0  | 0 0 | 1 1 | 0 0 | 0 0 | 0 0 | 29.47 |
| IPR005338 | 1 | 397 1 1  | 0 0 | 0 0 | 0 0 | 0 0 | 0 0 | 34.21 |
| IPR005350 | 1 | 11 1 1   | 0 0 | 0 0 | 0 0 | 0 0 | 0 0 | 38.09 |
| IPR005353 | 1 | 23 1 1   | 0 0 | 0 0 | 0 0 | 0 0 | 0 0 | 26.03 |
| IPR005361 | 1 | 43 1 1   | 0 0 | 0 0 | 0 0 | 0 0 | 0 0 | 18.1  |
| IPR005368 | 1 | 99 0 0   | 1 1 | 0 0 | 0 0 | 0 0 | 0 0 | 20.31 |
| IPR005495 | 1 | 1020 1 1 | 0 0 | 0 0 | 0 0 | 0 0 | 0 0 | 8.79  |
| IPR005499 | 1 | 31 1 1   | 0 0 | 0 0 | 0 0 | 0 0 | 0 0 | 45.16 |
| IPR005501 | 1 | 436 1 1  | 0 0 | 0 0 | 0 0 | 0 0 | 0 0 | 41.26 |
| IPR005509 | 1 | 28 1 1   | 0 0 | 0 0 | 0 0 | 0 0 | 0 0 | 16.13 |
| IPR005512 | 1 | 92 0 0   | 0 0 | 1 1 | 0 0 | 0 0 | 0 0 | 48.85 |
| IPR005518 | 1 | 20 0 0   | 0 0 | 1 1 | 0 0 | 0 0 | 0 0 | 50.85 |
| IPR005520 | 1 | 49 0 0   | 0 0 | 0 0 | 0 0 | 0 0 | 1 1 | 54.14 |
| IPR005521 | 1 | 84 0 0   | 0 0 | 0 0 | 0 0 | 0 0 | 1 1 | 30.96 |
| IPR005527 | 1 | 390 0 0  | 0 0 | 1 1 | 0 0 | 0 0 | 0 0 | 37.2  |
| IPR005531 | 1 | 555 1 1  | 0 0 | 0 0 | 0 0 | 0 0 | 0 0 | 23.81 |
| IPR005542 | 1 | 77 0 0   | 0 0 | 0 0 | 0 0 | 0 0 | 1 1 | 80.12 |
| IPR005551 | 1 | 99 1 1   | 0 0 | 0 0 | 0 0 | 0 0 | 0 0 | 38.61 |
| IPR005560 | 1 | 84 0 0   | 0 0 | 0 0 | 0 0 | 1 1 | 0 0 | 39.59 |
| IPR005565 | 1 | 216 1 1  | 0 0 | 0 0 | 0 0 | 0 0 | 0 0 | 17.13 |
| IPR005567 | 1 | 18 0 0   | 0 0 | 0 0 | 0 0 | 0 0 | 1 1 | 77.38 |
| IPR005568 | 1 | 60 0 0   | 0 0 | 1 0 | 1 0 | 1 0 | 1 0 | 34.58 |
| IPR005570 | 1 | 82 0 0   | 0 0 | 1 1 | 0 0 | 0 0 | 0 0 | 44.6  |
| IPR005572 | 1 | 214 1 1  | 0 0 | 0 0 | 0 0 | 0 0 | 0 0 | 24.18 |
| IPR005573 | 1 | 124 1 1  | 0 0 | 0 0 | 0 0 | 0 0 | 0 0 | 43    |
| IPR005578 | 1 | 102 0 0  | 0 0 | 0 0 | 0 0 | 0 0 | 0 0 | 34.57 |
| IPR005584 | 1 | 279 1 1  | 0 0 | 0 0 | 0 0 | 0 0 | 0 0 | 39.74 |
| IPR005586 | 1 | 400 1 1  | 0 0 | 0 0 | 0 0 | 0 0 | 0 0 | 9.34  |
| IPR005587 | 1 | 93 1 1   | 0 0 | 0 0 | 0 0 | 0 0 | 0 0 | 61.1  |
| IPR005615 | 1 | 122 0 0  | 0 0 | 1 1 | 0 0 | 1 1 | 0 0 | 32.44 |
| IPR005621 | 1 | 112 1 1  | 0 0 | 0 0 | 0 0 | 0 0 | 0 0 | 52.19 |
| IPR005638 | 1 | 3 2 0    | 0 0 | 2 0 | 0 0 | 0 0 | 0 0 | 22.92 |
| IPR005639 | 1 | 10 2 0   | 0 0 | 2 0 | 0 0 | 0 0 | 0 0 | 20.12 |
| IPR005640 | 1 | 21 0 0   | 0 0 | 0 0 | 0 0 | 0 0 | 1 1 | 48.69 |
| IPR005643 | 1 | 59 0 0   | 0 0 | 0 0 | 0 0 | 0 0 | 1 1 | 31.83 |
| IPR005646 | 1 | 187 1 1  | 0 0 | 0 0 | 0 0 | 0 0 | 0 0 | 16.25 |
| IPR005647 | 1 | 53 0 0   | 0 0 | 0 0 | 0 0 | 1 1 | 0 0 | 26.53 |
| IPR005649 | 1 | 38 0 0   | 0 0 | 0 0 | 0 0 | 0 0 | 1 1 | 34.87 |
| IPR005656 | 1 | 476 0 0  | 0 0 | 0 0 | 0 0 | 1 1 | 0 0 |       |

|           |   |          |     |     |     |     |     |       |
|-----------|---|----------|-----|-----|-----|-----|-----|-------|
| IPR005697 | 1 | 286 0 0  | 0 0 | 1 1 | 0 0 | 0 0 | 0 0 | 39.07 |
| IPR005708 | 1 | 289 1 1  | 0 0 | 0 0 | 0 0 | 0 0 | 0 0 | 30.32 |
| IPR005754 | 1 | 569 1 1  | 0 0 | 0 0 | 0 0 | 0 0 | 0 0 | 17.24 |
| IPR005809 | 1 | 5 1 1    | 0 0 | 0 0 | 0 0 | 1 0 | 0 0 | 57.27 |
| IPR005817 | 1 | 329 0 0  | 0 0 | 0 0 | 0 0 | 0 0 | 1 1 | 38.64 |
| IPR005830 | 1 | 25 1 1   | 0 0 | 1 1 | 0 0 | 0 0 | 0 0 | 24.48 |
| IPR005838 | 1 | 589 1 1  | 0 0 | 0 0 | 0 0 | 0 0 | 0 0 | 51.15 |
| IPR005866 | 1 | 17 0 0   | 1 1 | 0 0 | 0 0 | 0 0 | 0 0 | 45.26 |
| IPR005899 | 1 | 168 1 1  | 0 0 | 0 0 | 0 0 | 0 0 | 0 0 | 15.34 |
| IPR005956 | 1 | 23 1 1   | 0 0 | 0 0 | 0 0 | 0 0 | 0 0 | 25.13 |
| IPR006027 | 1 | 1366 1 0 | 1 0 | 1 0 | 0 0 | 0 0 | 0 0 | 19.2  |
| IPR006080 | 1 | 87 0 0   | 0 0 | 0 0 | 0 0 | 0 0 | 1 1 | 33.21 |
| IPR006081 | 1 | 4 0 0    | 0 0 | 0 0 | 0 0 | 0 0 | 1 1 | 39.79 |
| IPR006110 | 1 | 805 0 0  | 0 0 | 1 1 | 0 0 | 0 0 | 0 0 | 24.6  |
| IPR006135 | 1 | 813 1 1  | 0 0 | 0 0 | 0 0 | 0 0 | 0 0 | 30.86 |
| IPR006160 | 1 | 149 1 1  | 0 0 | 0 0 | 0 0 | 0 0 | 0 0 | 40.46 |
| IPR006173 | 1 | 103 1 1  | 0 0 | 0 0 | 0 0 | 0 0 | 0 0 | 25.65 |
| IPR006190 | 1 | 14 1 0   | 1 0 | 0 0 | 0 0 | 0 0 | 0 0 | 32.79 |
| IPR006195 | 1 | 11 0 0   | 1 1 | 0 0 | 0 0 | 0 0 | 0 0 | 20.61 |
| IPR006196 | 1 | 424 1 1  | 0 0 | 0 0 | 0 0 | 0 0 | 0 0 | 31.21 |
| IPR006231 | 1 | 302 1 1  | 0 0 | 0 0 | 0 0 | 0 0 | 0 0 | 45.15 |
| IPR006384 | 1 | 126 0 0  | 0 0 | 0 0 | 1 1 | 0 0 | 0 0 | 18.83 |
| IPR006395 | 1 | 47 1 1   | 0 0 | 0 0 | 0 0 | 0 0 | 0 0 | 30.77 |
| IPR006458 | 1 | 169 0 0  | 0 0 | 1 1 | 0 0 | 0 0 | 0 0 | 38.56 |
| IPR006472 | 1 | 232 1 0  | 1 0 | 0 0 | 0 0 | 0 0 | 0 0 | 43.67 |
| IPR006481 | 1 | 71 1 1   | 0 0 | 0 0 | 0 0 | 0 0 | 0 0 | 21.3  |
| IPR006487 | 1 | 128 1 1  | 0 0 | 0 0 | 0 0 | 0 0 | 0 0 | 52.74 |
| IPR006512 | 1 | 517 1 1  | 0 0 | 0 0 | 0 0 | 0 0 | 0 0 | 22.71 |
| IPR006541 | 1 | 67 1 1   | 0 0 | 0 0 | 0 0 | 0 0 | 0 0 | 28.44 |
| IPR006590 | 1 | 116 0 0  | 0 0 | 0 0 | 0 0 | 0 0 | 1 1 | 25.1  |
| IPR006607 | 1 | 69 0 0   | 0 0 | 1 0 | 0 0 | 0 0 | 1 0 | 41.85 |
| IPR006608 | 1 | 102 0 0  | 0 0 | 0 0 | 0 0 | 0 0 | 2 2 | 35.92 |
| IPR006625 | 1 | 482 0 0  | 0 0 | 0 0 | 0 0 | 0 0 | 1 1 | 14.76 |
| IPR006645 | 1 | 1019 1 0 | 1 0 | 1 0 | 0 0 | 0 0 | 0 0 | 28.02 |
| IPR006687 | 1 | 123 0 0  | 0 0 | 1 1 | 0 0 | 0 0 | 0 0 | 67.58 |
| IPR006698 | 1 | 276 0 0  | 1 1 | 0 0 | 0 0 | 0 0 | 0 0 | 34.92 |
| IPR006700 | 1 | 798 1 0  | 0 0 | 1 0 | 0 0 | 0 0 | 0 0 | 22.52 |
| IPR006701 | 1 | 117 1 1  | 0 0 | 0 0 | 0 0 | 0 0 | 1 1 | 15.79 |
| IPR006709 | 1 | 91 0 0   | 0 0 | 1 1 | 0 0 | 0 0 | 0 0 | 23.82 |
| IPR006711 | 1 | 37 0 0   | 0 0 | 0 0 | 0 0 | 0 0 | 1 1 | 36.05 |
| IPR006715 | 1 | 46 0 0   | 0 0 | 0 0 | 0 0 | 0 0 | 1 1 | 56.18 |
| IPR006723 | 1 | 19 0 0   | 0 0 | 0 0 | 0 0 | 0 0 | 1 1 | 42.21 |
| IPR006726 | 1 | 653 0 0  | 0 0 | 0 0 | 0 0 | 1 1 | 0 0 | 7.64  |
| IPR006737 | 1 | 30 0 0   | 0 0 | 0 0 | 0 0 | 1 1 | 0 0 | 45.68 |
| IPR006738 | 1 | 29 0 0   | 0 0 | 0 0 | 0 0 | 0 0 | 1 1 | 54.39 |
| IPR006742 | 1 | 21 0 0   | 0 0 | 0 0 | 0 0 | 1 1 | 0 0 | 77.88 |
| IPR006751 | 1 | 90 0 0   | 0 0 | 0 0 | 0 0 | 0 0 | 0 0 | 35.83 |
| IPR006752 | 1 | 26 0 0   | 1 1 | 0 0 | 0 0 | 0 0 | 0 0 | 29.84 |
| IPR006759 | 1 | 84 0 0   | 0 0 | 0 0 | 0 0 | 0 0 | 1 1 | 28.89 |
| IPR006761 | 1 | 49 0 0   | 0 0 | 0 0 | 0 0 | 0 0 | 1 1 | 53.4  |
| IPR006766 | 1 | 103 0 0  | 0 0 | 1 1 | 0 0 | 0 0 | 0 0 | 46.6  |
| IPR006779 | 1 | 18 0 0   | 0 0 | 1 1 | 0 0 | 0 0 | 0 0 | 76.84 |
| IPR006782 | 1 | 28 0 0   | 0 0 | 0 0 | 0 0 | 0 0 | 1 1 | 45.97 |
| IPR006786 | 1 | 63 0 0   | 0 0 | 0 0 | 0 0 | 0 0 | 1 1 | 32.42 |
| IPR006787 | 1 | 14 0 0   | 0 0 | 0 0 | 0 0 | 0 0 | 1 1 | 67.12 |
| IPR006796 | 1 | 39 0 0   | 0 0 | 0 0 | 0 0 | 0 0 | 1 1 | 48.07 |
| IPR006799 | 1 | 11 0 0   | 0 0 | 0 0 | 0 0 | 0 0 | 1 1 | 40.04 |
| IPR006820 | 1 | 23 0 0   | 0 0 | 0 0 | 0 0 | 0 0 | 1 1 | 36.89 |
| IPR006821 | 1 | 88 0 0   | 0 0 | 0 0 | 0 0 | 0 0 | 1 1 | 26.09 |
| IPR006826 | 1 | 77 1 1   | 0 0 | 0 0 | 0 0 | 0 0 | 0 0 | 13.81 |
| IPR006828 | 1 | 131 0 0  | 0 0 | 0 0 | 1 1 | 0 0 | 0 0 | 39.04 |
| IPR006838 | 1 | 153 0 0  | 0 0 | 0 0 | 0 0 | 1 1 | 0 0 | 14.68 |
| IPR006849 | 1 | 83 0 0   | 0 0 | 0 0 | 0 0 | 0 0 | 1 1 | 27.01 |
| IPR006873 | 1 | 75 0 0   | 0 0 | 2 2 | 0 0 | 0 0 | 0 0 | 51.83 |
| IPR006884 | 1 | 46 0 0   | 0 0 | 0 0 | 0 0 | 0 0 | 1 1 | 51.34 |
| IPR006894 | 1 | 152 1 1  | 0 0 | 0 0 | 0 0 | 0 0 | 0 0 | 26.85 |
| IPR006906 | 1 | 94 0 0   | 0 0 | 1 0 | 0 0 | 3 2 | 0 0 | 22.08 |
| IPR006909 | 1 | 123 0 0  | 0 0 | 1 0 | 1 0 | 1 0 | 1 0 | 29.08 |
| IPR006921 | 1 | 47 0 0   | 0 0 | 1 0 | 0 0 | 0 0 | 1 0 | 38.48 |
| IPR006925 | 1 | 78 0 0   | 0 0 | 1 0 | 1 0 | 1 0 | 1 0 | 30.26 |
| IPR006926 | 1 | 93 0 0   | 0 0 | 1 0 | 1 0 | 1 0 | 1 0 | 25.84 |
| IPR006927 | 1 | 57 0 0   | 0 0 | 1 1 | 0 0 | 0 0 | 0 0 | 36.31 |
| IPR006931 | 1 | 80 0 0   | 0 0 | 0 0 | 0 0 | 1 1 | 0 0 | 35.61 |
| IPR006954 | 1 | 28 0 0   | 0 0 | 0 0 | 0 0 | 0 0 | 1 1 | 17.44 |
| IPR006973 | 1 | 79 0 0   | 0 0 | 0 0 | 0 0 | 1 1 | 0 0 | 43.29 |
| IPR006975 | 1 | 51 1 1   | 0 0 | 0 0 | 0 0 | 0 0 | 0 0 | 31.4  |
| IPR006978 | 1 | 65 0 0   | 1 1 | 0 0 | 0 0 | 0 0 | 0 0 | 33.99 |
| IPR006979 | 1 | 63 0 0   | 1 1 | 0 0 | 0 0 | 0 0 | 0 0 | 33.22 |
| IPR006984 | 1 | 99 0 0   | 0 0 | 0 0 | 0 0 | 1 1 | 0 0 | 25.13 |
| IPR006996 | 1 | 73 0 0   | 0 0 | 0 0 | 0 0 | 1 1 | 0 0 | 22.8  |
| IPR007000 | 1 | 77 1 1   | 0 0 | 0 0 | 0 0 | 0 0 | 0 0 | 22.54 |
| IPR007015 | 1 | 87 0 0   | 0 0 | 0 0 | 0 0 | 0 0 | 1 1 | 16.58 |
| IPR007033 | 1 | 58 0 0   | 0 0 | 1 1 | 0 0 | 0 0 | 0 0 | 39.37 |
| IPR007036 | 1 | 574 2 2  | 0 0 | 0 0 | 0 0 | 0 0 | 0 0 | 11.67 |
| IPR007059 | 1 | 261 1 0  | 1 0 | 0 0 | 0 0 | 0 0 | 0 0 | 13.57 |
| IPR007064 | 1 | 151 0 0  | 0 0 | 1 1 | 0 0 | 0 0 | 0 0 | 27.30 |
| IPR007069 | 1 | 179 1 1  | 0 0 | 0 0 | 0 0 | 0 0 | 0 0 | 21.95 |
| IPR007076 | 1 | 240 1 1  | 0 0 | 0 0 | 0 0 | 0 0 | 0 0 | 15.09 |
| IPR007115 | 1 | 793 1 1  | 0 0 | 0 0 | 0 0 | 0 0 | 0 0 | 23.21 |
| IPR007136 | 1 | 411 0 0  | 0 0 | 1 1 | 0 0 | 0 0 | 0 0 | 23.78 |
| IPR007139 | 1 | 310 0 0  | 0 0 | 0 0 | 0 0 | 1 1 | 0 0 | 18.84 |
| IPR007145 | 1 | 174 0 0  | 0 0 | 1 1 | 0 0 | 0 0 | 0 0 | 16.74 |
| IPR007152 | 1 | 50 1 1   | 0 0 | 0 0 | 0 0 | 0 0 | 0 0 | 17.45 |
| IPR007156 | 1 | 525 1 1  | 0 0 | 0 0 | 0 0 | 0 0 | 0 0 | 32.04 |
| IPR007161 | 1 | 105 1 1  | 0 0 | 0 0 | 0 0 | 0 0 | 0 0 | 14.17 |
| IPR007165 | 1 | 315 1 0  | 0 0 | 1 0 | 0 0 | 0 0 | 0 0 | 30.64 |
| IPR007177 | 1 | 108 0 0  | 1 0 | 1 0 | 1 0 | 1 0 | 1 0 | 45.91 |
| IPR007179 | 1 | 24 0 0   | 1 1 | 0 0 | 0 0 | 0 0 | 0 0 | 61.59 |
| IPR007181 | 1 | 24 0 0   | 1 1 | 0 0 | 0 0 | 0 0 | 0 0 | 31.61 |
| IPR007201 | 1 | 95 0 0   | 0 0 | 1 1 | 0 0 | 0 0 | 0 0 | 52.87 |
| IPR007203 | 1 | 98 0 0   | 0 0 | 0 0 | 0 0 | 0 0 | 1 1 | 46.8  |
| IPR007207 | 1 | 77 0 0   | 0 0 | 0 0 | 0 0 | 1 0 | 0 0 | 50.47 |
| IPR007224 | 1 | 26 0 0   | 0 0 | 0 0 | 0 0 | 1 1 | 0 0 | 27.76 |
| IPR007230 | 1 | 105 0 0  | 0 0 | 1 0 | 0 0 | 1 0 | 2 1 | 34.18 |
| IPR007232 | 1 | 87 0 0   | 0 0 | 0 0 | 0 0 | 0 0 | 1 1 | 26.66 |
| IPR007239 | 1 | 85 0 0   | 0 0 | 0 0 | 0 0 | 0 0 | 1 1 | 29.39 |
| IPR007240 | 1 | 46 0 0   | 0 0 | 1 0 | 0 0 | 1 0 | 0 0 | 20.93 |
| IPR007244 | 1 | 71 0 0   | 0 0 | 0 0 | 0 0 | 0 0 | 0 0 | 29.42 |
| IPR007245 | 1 | 89 0 0   | 0 0 | 0 0 | 1 1 | 0 0 | 1 1 | 30.22 |
| IPR007246 | 1 | 70 0 0   | 0 0 | 0 0 | 0 0 | 1 1 | 0 0 | 27.13 |
| IPR007247 | 1 | 213 0 0  | 0 0 | 0 0 | 0 0 | 1 1 | 0 0 | 27.14 |
| IPR007258 | 1 | 100 0 0  | 0 0 | 0 0 | 0 0 | 1 1 | 0 0 | 29.23 |
| IPR007260 | 1 | 221 1 1  | 0 0 | 0 0 | 0 0 | 0 0 | 0 0 | 42.33 |
| IPR007265 | 1 | 75 0 0   | 0 0 | 0 0 | 0 0 | 0 0 | 1 1 | 26.93 |
| IPR007276 | 1 | 80 0 0   | 0 0 | 1 1 | 0 0 | 0 0 | 0 0 | 25.62 |
| IPR007282 | 1 | 199 0 0  | 0 0 | 1 0 | 0 0 | 1 0 | 1 0 | 24.67 |
| IPR007301 | 1 | 30 1 1   | 0 0 | 0 0 | 0 0 | 0 0 | 0 0 | 28.17 |
| IPR007307 | 1 | 64 0 0   | 0 0 | 0 0 | 0 0 | 0 0 | 1 1 | 32.22 |
| IPR007308 | 1 | 74 0 0   | 0 0 | 0 0 | 0 0 | 0 0 | 1 1 | 30.09 |
| IPR007309 | 1 | 86 0 0   | 0 0 | 0 0 | 0 0 | 0 0 | 1 1 | 12.91 |
| IPR007313 | 1 | 307 1 1  | 0 0 | 0 0 | 0 0 | 0 0 | 0 0 | 26.37 |
| IPR007331 | 1 | 28 1 1   | 0 0 | 0 0 | 0 0 | 0 0 | 0 0 | 21.86 |
| IPR007335 | 1 | 110 1 1  | 0 0 | 0 0 | 0 0 | 0 0 | 0 0 | 55.8  |
| IPR007342 | 1 | 226 0 0  | 0 0 | 0 0 | 0 0 | 1 0 | 1 0 | 46.8  |
| IPR007353 | 1 | 473 1 1  | 0 0 | 0 0 | 0 0 | 0 0 | 0 0 | 24.11 |
| IPR007357 | 1 | 153 1 0  | 0 0 | 1 0 | 0 0 | 0 0 | 0 0 | 24.7  |
| IPR007359 | 1 | 205 1 1  | 0 0 | 0 0 | 0 0 | 0 0 | 0 0 | 17.31 |
| IPR007360 | 1 | 149 1 1  | 0 0 | 0 0 | 0 0 | 0 0 | 0 0 | 31.63 |
| IPR007378 | 1 | 53 0 0   | 0 0 | 1 1 | 0 0 | 0 0 | 0 0 | 21.45 |
| IPR007383 | 1 | 354 0 0  | 0 0 | 0 0 | 1 1 | 0 0 | 0 0 | 15.36 |
| IPR007392 | 1 | 357 1 1  | 0 0 | 0 0 | 0 0 | 0 0 | 0 0 | 34.24 |
| IPR007394 | 1 | 157 1 1  | 0 0 | 0 0 | 0 0 | 0 0 | 0 0 | 42.44 |
| IPR007398 | 1 | 33 1 1   | 0 0 | 0 0 | 0 0 | 0 0 | 0 0 | 33.72 |
| IPR007402 | 1 | 164 0 0  | 0 0 | 0 0 | 0 0 | 1 1 | 0 0 | 34.11 |
| IPR007403 | 1 | 159 1 1  | 0 0 | 0 0 | 0 0 | 0 0 | 0 0 | 18.25 |
| IPR007411 | 1 | 115 1 1  | 0 0 | 0 0 | 0 0 | 0 0 | 0 0 | 58.04 |
| IPR007415 | 1 | 82 1 1   | 0 0 | 0 0 | 0 0 | 0 0 | 0 0 | 42.46 |
| IPR007433 | 1 | 251 1 1  | 0 0 | 0 0 | 0 0 | 0 0 | 0 0 | 8.27  |
| IPR007435 | 1 | 224 1 1  | 0 0 | 0 0 | 0 0 | 0 0 | 0 0 | 18.1  |
| IPR007439 | 1 | 242 1 1  | 0 0 | 0 0 | 0 0 | 0 0 | 0 0 | 30.41 |
| IPR007450 | 1 | 498 1 1  | 0 0 | 0 0 | 0 0 | 0 0 | 0 0 | 20.18 |
| IPR007454 | 1 | 294 0 0  | 0 0 | 1 1 | 0 0 | 0 0 | 0 0 | 23.94 |
| IPR007468 | 1 | 50 1 1   | 0 0 | 0 0 | 0 0 | 0 0 | 0 0 | 23.25 |
| IPR007470 | 1 | 209 1 1  | 0 0 | 0 0 | 0 0 | 0 0 | 0 0 | 17.66 |
| IPR007476 | 1 | 254 1 1  | 0 0 | 0 0 | 0 0 | 0 0 | 0 0 | 26.77 |
| IPR007486 | 1 | 142 1 1  | 0 0 | 0 0 | 0 0 | 0 0 |     |       |

|           |   |         |     |     |     |     |     |       |
|-----------|---|---------|-----|-----|-----|-----|-----|-------|
| IPR007493 | 1 | 230 0 0 | 0 0 | 1 1 | 0 0 | 0 0 | 0 0 | 29.52 |
| IPR007494 | 1 | 78 1 1  | 0 0 | 0 0 | 0 0 | 0 0 | 0 0 | 47    |
| IPR007496 | 1 | 388 0 0 | 0 0 | 0 0 | 0 0 | 1 1 | 0 0 | 8.77  |
| IPR007498 | 1 | 626 0 0 | 0 0 | 1 1 | 0 0 | 0 0 | 0 0 | 20.71 |
| IPR007505 | 1 | 46 1 0  | 1 0 | 0 0 | 0 0 | 0 0 | 0 0 | 18.45 |
| IPR007506 | 1 | 69 1 0  | 1 0 | 0 0 | 0 0 | 1 0 | 0 0 | 31.35 |
| IPR007509 | 1 | 11 0 0  | 1 1 | 0 0 | 0 0 | 0 0 | 0 0 | 27.3  |
| IPR007513 | 1 | 102 0 0 | 0 0 | 1 1 | 0 0 | 0 0 | 0 0 | 34.04 |
| IPR007515 | 1 | 35 0 0  | 0 0 | 0 0 | 0 0 | 1 1 | 0 0 | 41.08 |
| IPR007519 | 1 | 29 0 0  | 0 0 | 0 0 | 0 0 | 1 1 | 0 0 | 26.08 |
| IPR007521 | 1 | 47 0 0  | 0 0 | 1 0 | 0 0 | 1 0 | 0 0 | 22.9  |
| IPR007523 | 1 | 260 0 0 | 0 0 | 0 0 | 0 0 | 0 0 | 1 1 | 21.26 |
| IPR007524 | 1 | 31 0 0  | 0 0 | 1 1 | 0 0 | 0 0 | 0 0 | 37.4  |
| IPR007534 | 1 | 67 1 1  | 0 0 | 0 0 | 0 0 | 0 0 | 0 0 | 17.18 |
| IPR007535 | 1 | 245 1 0 | 0 0 | 1 0 | 0 0 | 0 0 | 0 0 | 28.57 |
| IPR007538 | 1 | 41 1 1  | 0 0 | 0 0 | 0 0 | 0 0 | 0 0 | 30.89 |
| IPR007539 | 1 | 51 1 1  | 0 0 | 0 0 | 0 0 | 0 0 | 0 0 | 26.56 |
| IPR007544 | 1 | 81 0 0  | 1 1 | 0 0 | 0 0 | 0 0 | 0 0 | 27.44 |
| IPR007565 | 1 | 42 1 1  | 0 0 | 0 0 | 0 0 | 0 0 | 0 0 | 33.02 |
| IPR007568 | 1 | 298 0 0 | 0 0 | 0 0 | 0 0 | 1 1 | 0 0 | 23.64 |
| IPR007606 | 1 | 26 0 0  | 0 0 | 0 0 | 0 0 | 0 0 | 0 0 | 25.59 |
| IPR007607 | 1 | 449 1 1 | 0 0 | 0 0 | 0 0 | 0 0 | 0 0 | 22.16 |
| IPR007614 | 1 | 152 0 0 | 0 0 | 0 0 | 0 0 | 0 0 | 1 1 | 50.33 |
| IPR007635 | 1 | 19 0 0  | 0 0 | 0 0 | 0 0 | 0 0 | 1 1 | 56.35 |
| IPR007637 | 1 | 24 1 1  | 0 0 | 0 0 | 0 0 | 0 0 | 0 0 | 33.67 |
| IPR007648 | 1 | 103 0 0 | 0 0 | 0 0 | 0 0 | 0 0 | 1 1 | 27.02 |
| IPR007651 | 1 | 102 0 0 | 0 0 | 1 0 | 0 0 | 1 0 | 0 0 | 48.77 |
| IPR007652 | 1 | 110 1 0 | 0 0 | 1 0 | 0 0 | 0 0 | 1 0 | 29.1  |
| IPR007653 | 1 | 106 0 0 | 0 0 | 1 1 | 0 0 | 0 0 | 0 0 | 27.48 |
| IPR007666 | 1 | 49 0 0  | 0 0 | 0 0 | 0 0 | 0 0 | 1 1 | 26.21 |
| IPR007668 | 1 | 19 0 0  | 0 0 | 0 0 | 0 0 | 0 0 | 2 2 | 47.75 |
| IPR007671 | 1 | 17 0 0  | 0 0 | 0 0 | 0 0 | 0 0 | 1 1 | 35.97 |
| IPR007672 | 1 | 8 0 0   | 0 0 | 0 0 | 0 0 | 0 0 | 1 1 | 48.29 |
| IPR007676 | 1 | 101 0 0 | 0 0 | 1 1 | 0 0 | 0 0 | 0 0 | 29.57 |
| IPR007701 | 1 | 89 0 0  | 0 0 | 1 0 | 0 0 | 0 0 | 1 0 | 21.92 |
| IPR007709 | 1 | 369 1 1 | 0 0 | 0 0 | 0 0 | 0 0 | 0 0 | 17.56 |
| IPR007711 | 1 | 237 1 1 | 0 0 | 0 0 | 0 0 | 0 0 | 0 0 | 28.2  |
| IPR007719 | 1 | 54 0 0  | 0 0 | 1 1 | 0 0 | 0 0 | 0 0 | 32.02 |
| IPR007724 | 1 | 70 0 0  | 0 0 | 0 0 | 0 0 | 0 0 | 1 1 | 30.43 |
| IPR007725 | 1 | 65 0 0  | 0 0 | 1 0 | 0 0 | 1 0 | 1 0 | 20.66 |
| IPR007745 | 1 | 79 0 0  | 0 0 | 0 0 | 0 0 | 0 0 | 1 1 | 44.85 |
| IPR007749 | 1 | 60 0 0  | 0 0 | 1 1 | 0 0 | 0 0 | 0 0 | 21.69 |
| IPR007759 | 1 | 117 2 2 | 0 0 | 0 0 | 0 0 | 0 0 | 0 0 | 36.59 |
| IPR007771 | 1 | 13 1 1  | 0 0 | 0 0 | 0 0 | 0 0 | 0 0 | 52.78 |
| IPR007802 | 1 | 15 0 0  | 0 0 | 1 1 | 0 0 | 0 0 | 0 0 | 68.07 |
| IPR007805 | 1 | 37 1 1  | 0 0 | 0 0 | 0 0 | 0 0 | 0 0 | 40.3  |
| IPR007809 | 1 | 366 1 1 | 0 0 | 0 0 | 0 0 | 1 1 | 0 0 | 7.22  |
| IPR007814 | 1 | 324 0 0 | 0 0 | 1 1 | 0 0 | 0 0 | 0 0 | 20.43 |
| IPR007816 | 1 | 395 1 1 | 0 0 | 0 0 | 0 0 | 0 0 | 0 0 | 13.81 |
| IPR007832 | 1 | 93 0 0  | 0 0 | 1 1 | 0 0 | 0 0 | 0 0 | 28.63 |
| IPR007838 | 1 | 516 1 1 | 0 0 | 0 0 | 0 0 | 0 0 | 0 0 | 15.61 |
| IPR007840 | 1 | 160 1 1 | 0 0 | 0 0 | 0 0 | 0 0 | 0 0 | 51.19 |
| IPR007849 | 1 | 45 0 0  | 0 0 | 1 1 | 0 0 | 0 0 | 0 0 | 24.62 |
| IPR007851 | 1 | 76 0 0  | 0 0 | 0 0 | 0 0 | 0 0 | 1 1 | 30.59 |
| IPR007864 | 1 | 268 1 1 | 0 0 | 0 0 | 0 0 | 0 0 | 0 0 | 29    |
| IPR007872 | 1 | 136 0 0 | 0 0 | 1 0 | 0 0 | 1 0 | 0 0 | 36.36 |
| IPR007874 | 1 | 238 1 1 | 0 0 | 0 0 | 0 0 | 0 0 | 0 0 | 17.64 |
| IPR007875 | 1 | 76 0 0  | 0 0 | 0 0 | 0 0 | 0 0 | 1 1 | 43.94 |
| IPR007881 | 1 | 66 0 0  | 0 0 | 0 0 | 0 0 | 1 1 | 0 0 | 40.49 |
| IPR007897 | 1 | 178 1 1 | 0 0 | 0 0 | 0 0 | 0 0 | 0 0 | 37.97 |
| IPR007904 | 1 | 105 0 0 | 0 0 | 0 0 | 0 0 | 1 1 | 0 0 | 35.71 |
| IPR007905 | 1 | 89 0 0  | 0 0 | 0 0 | 0 0 | 1 1 | 0 0 | 23.05 |
| IPR007915 | 1 | 42 0 0  | 0 0 | 1 1 | 0 0 | 0 0 | 0 0 | 59.7  |
| IPR007943 | 1 | 47 0 0  | 0 0 | 0 0 | 0 0 | 0 0 | 1 1 | 63.3  |
| IPR007946 | 1 | 75 0 0  | 0 0 | 0 0 | 0 0 | 1 1 | 0 0 | 23.32 |
| IPR007953 | 1 | 8 1 1   | 0 0 | 0 0 | 0 0 | 0 0 | 0 0 | 51.34 |
| IPR007955 | 1 | 85 0 0  | 0 0 | 0 0 | 0 0 | 0 0 | 0 0 | 46.1  |
| IPR007964 | 1 | 25 0 0  | 0 0 | 0 0 | 0 0 | 0 0 | 1 1 | 36.18 |
| IPR007969 | 1 | 182 1 1 | 0 0 | 0 0 | 0 0 | 0 0 | 0 0 | 14.82 |
| IPR007988 | 1 | 21 0 0  | 0 0 | 0 0 | 0 0 | 0 0 | 1 1 | 59.98 |
| IPR007995 | 1 | 109 1 1 | 0 0 | 0 0 | 0 0 | 0 0 | 0 0 | 31.92 |
| IPR008008 | 1 | 20 1 1  | 0 0 | 0 0 | 0 0 | 0 0 | 0 0 | 34.14 |
| IPR008012 | 1 | 85 0 0  | 0 0 | 0 0 | 0 0 | 1 1 | 0 0 | 24.71 |
| IPR008013 | 1 | 38 0 0  | 0 0 | 0 0 | 0 0 | 0 0 | 1 1 | 44.01 |
| IPR008035 | 1 | 3 1 1   | 0 0 | 0 0 | 0 0 | 0 0 | 0 0 | 21.52 |
| IPR008081 | 1 | 73 0 0  | 0 0 | 0 0 | 0 0 | 0 0 | 1 1 | 38.97 |
| IPR008106 | 1 | 51 1 1  | 0 0 | 0 0 | 0 0 | 0 0 | 0 0 | 35.48 |
| IPR008195 | 1 | 172 0 0 | 0 0 | 0 0 | 0 0 | 0 0 | 1 1 | 36.1  |
| IPR008283 | 1 | 827 1 0 | 0 0 | 1 0 | 0 0 | 1 0 | 0 0 | 12.24 |
| IPR008312 | 1 | 281 1 1 | 0 0 | 0 0 | 0 0 | 0 0 | 0 0 | 33.84 |
| IPR008313 | 1 | 105 0 0 | 0 0 | 0 0 | 0 0 | 0 0 | 0 0 | 42.53 |
| IPR008380 | 1 | 138 0 0 | 0 0 | 1 1 | 0 0 | 0 0 | 0 0 | 29.48 |
| IPR008390 | 1 | 52 0 0  | 0 0 | 1 1 | 0 0 | 0 0 | 0 0 | 44.41 |
| IPR008405 | 1 | 54 0 0  | 0 0 | 0 0 | 0 0 | 0 0 | 1 1 | 27.87 |
| IPR008407 | 1 | 483 1 1 | 0 0 | 0 0 | 0 0 | 0 0 | 0 0 | 12.94 |
| IPR008441 | 1 | 42 1 1  | 0 0 | 0 0 | 0 0 | 0 0 | 0 0 | 15.73 |
| IPR008442 | 1 | 19 0 0  | 0 0 | 0 0 | 0 0 | 1 1 | 0 0 | 34.47 |
| IPR008462 | 1 | 599 1 1 | 0 0 | 0 0 | 0 0 | 0 0 | 0 0 | 29.73 |
| IPR008465 | 1 | 48 0 0  | 0 0 | 0 0 | 0 0 | 0 0 | 1 1 | 26.08 |
| IPR008468 | 1 | 36 0 0  | 0 0 | 1 1 | 0 0 | 0 0 | 0 0 | 47.27 |
| IPR008474 | 1 | 11 0 0  | 0 0 | 0 0 | 0 0 | 1 1 | 0 0 | 50.89 |
| IPR008477 | 1 | 45 0 0  | 0 0 | 0 0 | 0 0 | 0 0 | 0 0 | 47.05 |
| IPR008493 | 1 | 72 0 0  | 0 0 | 1 1 | 0 0 | 0 0 | 0 0 | 30.51 |
| IPR008503 | 1 | 220 1 0 | 1 0 | 0 0 | 0 0 | 0 0 | 0 0 | 27.42 |
| IPR008525 | 1 | 8 1 1   | 0 0 | 0 0 | 0 0 | 0 0 | 0 0 | 52.72 |
| IPR008535 | 1 | 69 1 1  | 0 0 | 0 0 | 0 0 | 0 0 | 0 0 | 47.91 |
| IPR008540 | 1 | 63 0 0  | 0 0 | 1 1 | 0 0 | 0 0 | 0 0 | 44.86 |
| IPR008542 | 1 | 129 1 1 | 0 0 | 0 0 | 0 0 | 0 0 | 0 0 | 32.01 |
| IPR008555 | 1 | 55 0 0  | 0 0 | 0 0 | 0 0 | 0 0 | 1 1 | 29.83 |
| IPR008570 | 1 | 80 0 0  | 0 0 | 0 0 | 0 0 | 0 0 | 1 1 | 37.2  |
| IPR008585 | 1 | 55 1 1  | 0 0 | 0 0 | 0 0 | 0 0 | 0 0 | 27.29 |
| IPR008592 | 1 | 24 1 1  | 0 0 | 0 0 | 0 0 | 0 0 | 0 0 | 74.6  |
| IPR008659 | 1 | 26 0 0  | 0 0 | 0 0 | 0 0 | 0 0 | 0 0 | 31.2  |
| IPR008665 | 1 | 31 1 1  | 0 0 | 0 0 | 0 0 | 0 0 | 0 0 | 42.87 |
| IPR008672 | 1 | 84 0 0  | 0 0 | 0 0 | 0 0 | 1 1 | 0 0 | 21.57 |
| IPR008675 | 1 | 6 0 0   | 0 0 | 0 0 | 0 0 | 1 1 | 0 0 | 59.69 |
| IPR008687 | 1 | 122 1 1 | 0 0 | 0 0 | 0 0 | 0 0 | 0 0 | 25.75 |
| IPR008701 | 1 | 38 1 1  | 0 0 | 0 0 | 0 0 | 0 0 | 0 0 | 29.79 |
| IPR008703 | 1 | 126 2 2 | 0 0 | 0 0 | 0 0 | 0 0 | 0 0 | 52.4  |
| IPR008758 | 1 | 339 0 0 | 0 0 | 1 1 | 0 0 | 0 0 | 0 0 | 21.23 |
| IPR008763 | 1 | 79 1 1  | 0 0 | 0 0 | 0 0 | 0 0 | 0 0 | 44.73 |
| IPR008774 | 1 | 102 0 0 | 0 0 | 0 0 | 0 0 | 0 0 | 1 1 | 39.73 |
| IPR008778 | 1 | 637 1 0 | 1 0 | 1 0 | 0 0 | 1 0 | 1 0 | 21.78 |
| IPR008794 | 1 | 275 0 0 | 0 0 | 0 0 | 0 0 | 1 1 | 0 0 | 31.61 |
| IPR008796 | 1 | 19 0 0  | 0 0 | 1 1 | 0 0 | 0 0 | 0 0 | 35.61 |
| IPR008822 | 1 | 233 1 1 | 0 0 | 0 0 | 0 0 | 0 0 | 0 0 | 12.45 |
| IPR008826 | 1 | 100 0 0 | 0 0 | 0 0 | 0 0 | 0 0 | 1 1 | 46.43 |
| IPR008828 | 1 | 85 0 0  | 0 0 | 0 0 | 0 0 | 0 0 | 1 1 | 16.18 |
| IPR008844 | 1 | 333 1 1 | 0 0 | 0 0 | 0 0 | 0 0 | 0 0 | 13.55 |
| IPR008853 | 1 | 52 0 0  | 0 0 | 0 0 | 0 0 | 1 1 | 0 0 | 44.87 |
| IPR008866 | 1 | 178 1 1 | 0 0 | 0 0 | 0 0 | 0 0 | 0 0 | 24.7  |
| IPR008869 | 1 | 385 0 0 | 0 0 | 1 1 | 0 0 | 0 0 | 0 0 | 18.63 |
| IPR008876 | 1 | 23 1 1  | 0 0 | 0 0 | 0 0 | 0 0 | 0 0 | 32.01 |
| IPR008900 | 1 | 98 1 0  | 1 0 | 0 0 | 0 0 | 0 0 | 0 0 | 9.19  |
| IPR008910 | 1 | 474 1 0 | 1 0 | 0 0 | 0 0 | 0 0 | 0 0 | 19.44 |
| IPR008920 | 1 | 120 1 1 | 0 0 | 0 0 | 0 0 | 0 0 | 0 0 | 52.43 |
| IPR009047 | 1 | 21 0 0  | 1 1 | 0 0 | 0 0 | 0 0 | 0 0 | 74.04 |
| IPR009066 | 1 | 30 0 0  | 0 0 | 0 0 | 0 0 | 0 0 | 1 1 | 52.32 |
| IPR009095 | 1 | 8 0 0   | 0 0 | 0 0 | 0 0 | 0 0 | 1 1 | 52.05 |
| IPR009200 | 1 | 96 1 1  | 0 0 | 0 0 | 0 0 | 0 0 | 0 0 | 29.72 |
| IPR009225 | 1 | 91 1 1  | 0 0 | 0 0 | 0 0 | 0 0 | 0 0 | 25.47 |
| IPR009242 | 1 | 171 1 1 | 0 0 | 0 0 | 0 0 | 0 0 | 0 0 | 45.55 |
| IPR009246 | 1 | 199 1 1 | 0 0 | 0 0 | 0 0 | 0 0 | 0 0 | 38.85 |
| IPR009267 | 1 | 117 1 1 | 0 0 | 0 0 | 0 0 | 0 0 | 0 0 | 32.41 |
| IPR009279 | 1 | 60 1 1  | 0 0 | 0 0 | 0 0 | 0 0 | 0 0 | 15.11 |
| IPR009282 | 1 | 173 1 1 | 0 0 | 0 0 | 0 0 | 0 0 | 0 0 | 21.43 |
| IPR009317 | 1 | 125 1 1 | 0 0 | 0 0 | 0 0 | 0 0 | 0 0 | 45.8  |
| IPR009318 | 1 | 139 0 0 | 0 0 | 0 0 | 0 0 | 0 0 | 1 1 | 25.73 |
| IPR009319 | 1 | 26 1 1  | 0 0 | 0 0 | 0 0 | 0 0 | 0 0 | 15.43 |
| IPR009321 | 1 | 39 0 0  | 1 1 | 0 0 | 0 0 | 0 0 | 0 0 | 27.01 |
| IPR009322 | 1 | 62 1 1  | 0 0 | 0 0 | 0 0 | 0 0 | 0 0 | 43.7  |
| IPR009346 | 1 | 67 0 0  | 0 0 | 0 0 | 0 0 | 0 0 | 1 1 | 33.75 |
| IPR009358 | 1 | 8 1 1   | 0 0 | 0 0 | 0 0 | 0 0 | 0 0 | 51.43 |
| IPR009359 | 1 | 138 0 0 | 0 0 | 1 1 | 0 0 | 0 0 | 0 0 | 55.91 |
| IPR009383 | 1 | 86 0 0  | 0 0 | 1 1 | 0 0 | 0 0 | 0 0 | 78.28 |
| IPR009395 | 1 | 64 0 0  | 0 0 | 1 1 | 0 0 | 0 0 | 0 0 | 30.78 |
| IPR009398 |   |         |     |     |     |     |     |       |

|           |   |         |     |     |     |     |     |       |
|-----------|---|---------|-----|-----|-----|-----|-----|-------|
| IPR009424 | 1 | 43 0 0  | 0 0 | 1 1 | 0 0 | 0 0 | 0 0 | 47.89 |
| IPR009430 | 1 | 101 1 1 | 0 0 | 0 0 | 0 0 | 0 0 | 0 0 | 13.55 |
| IPR009434 | 1 | 8 0 0   | 0 0 | 0 0 | 0 0 | 1 1 | 0 0 | 69.35 |
| IPR009444 | 1 | 134 1 1 | 0 0 | 0 0 | 0 0 | 0 0 | 0 0 | 29.37 |
| IPR009445 | 1 | 80 0 0  | 0 0 | 0 0 | 0 0 | 0 0 | 0 0 | 37.39 |
| IPR009455 | 1 | 9 0 0   | 0 0 | 1 1 | 0 0 | 0 0 | 0 0 | 77.09 |
| IPR009486 | 1 | 70 1 1  | 0 0 | 0 0 | 0 0 | 0 0 | 0 0 | 42.59 |
| IPR009493 | 1 | 43 1 1  | 0 0 | 0 0 | 0 0 | 0 0 | 0 0 | 42.66 |
| IPR009496 | 1 | 30 0 0  | 0 0 | 0 0 | 0 0 | 1 1 | 0 0 | 48.02 |
| IPR009505 | 1 | 7 0 0   | 0 0 | 0 0 | 0 0 | 0 0 | 1 1 | 65.7  |
| IPR009508 | 1 | 11 0 0  | 0 0 | 0 0 | 0 0 | 0 0 | 1 1 | 67.16 |
| IPR009523 | 1 | 17 0 0  | 0 0 | 0 0 | 0 0 | 0 0 | 1 1 | 44.71 |
| IPR009528 | 1 | 21 1 1  | 0 0 | 0 0 | 0 0 | 0 0 | 0 0 | 31.34 |
| IPR009554 | 1 | 118 1 1 | 0 0 | 0 0 | 0 0 | 0 0 | 0 0 | 46.93 |
| IPR009558 | 1 | 47 1 1  | 0 0 | 0 0 | 0 0 | 0 0 | 0 0 | 57.29 |
| IPR009560 | 1 | 105 1 1 | 0 0 | 0 0 | 0 0 | 0 0 | 0 0 | 29.46 |
| IPR009602 | 1 | 31 0 0  | 0 0 | 0 0 | 0 0 | 0 0 | 1 1 | 46.83 |
| IPR009611 | 1 | 15 0 0  | 0 0 | 0 0 | 0 0 | 0 0 | 1 1 | 76.97 |
| IPR009619 | 1 | 70 1 1  | 0 0 | 0 0 | 0 0 | 0 0 | 0 0 | 38.66 |
| IPR009637 | 1 | 191 0 0 | 0 0 | 0 0 | 0 0 | 0 0 | 1 1 | 18.41 |
| IPR009639 | 1 | 9 0 0   | 1 1 | 0 0 | 0 0 | 0 0 | 0 0 | 35    |
| IPR009648 | 1 | 91 1 1  | 0 0 | 0 0 | 0 0 | 0 0 | 0 0 | 33.08 |
| IPR009655 | 1 | 31 0 0  | 1 1 | 0 0 | 0 0 | 0 0 | 0 0 | 21.02 |
| IPR009671 | 1 | 208 1 1 | 0 0 | 0 0 | 0 0 | 0 0 | 0 0 | 25.61 |
| IPR009685 | 1 | 19 0 0  | 0 0 | 0 0 | 0 0 | 0 0 | 1 1 | 38.84 |
| IPR009686 | 1 | 79 0 0  | 0 0 | 0 0 | 0 0 | 0 0 | 1 1 | 22.67 |
| IPR009711 | 1 | 248 1 1 | 0 0 | 0 0 | 0 0 | 0 0 | 0 0 | 19.98 |
| IPR009714 | 1 | 22 0 0  | 0 0 | 0 0 | 0 0 | 0 0 | 1 1 | 49.24 |
| IPR009718 | 1 | 236 1 1 | 0 0 | 0 0 | 0 0 | 0 0 | 0 0 | 39.88 |
| IPR009720 | 1 | 56 0 0  | 1 1 | 0 0 | 0 0 | 0 0 | 0 0 | 44.2  |
| IPR009726 | 1 | 35 1 1  | 0 0 | 0 0 | 0 0 | 0 0 | 0 0 | 29.52 |
| IPR009732 | 1 | 179 1 1 | 0 0 | 0 0 | 0 0 | 0 0 | 0 0 | 29.1  |
| IPR009733 | 1 | 17 0 0  | 0 0 | 0 0 | 0 0 | 0 0 | 1 1 | 41.43 |
| IPR009743 | 1 | 15 0 0  | 0 0 | 1 1 | 0 0 | 0 0 | 0 0 | 66.81 |
| IPR009772 | 1 | 67 0 0  | 0 0 | 0 0 | 0 0 | 1 1 | 0 0 | 30.94 |
| IPR009783 | 1 | 168 1 1 | 0 0 | 0 0 | 0 0 | 0 0 | 0 0 | 62.43 |
| IPR009791 | 1 | 13 1 1  | 0 0 | 0 0 | 0 0 | 0 0 | 0 0 | 47.31 |
| IPR009798 | 1 | 24 0 0  | 0 0 | 1 1 | 0 0 | 0 0 | 0 0 | 43.61 |
| IPR009799 | 1 | 176 1 1 | 0 0 | 0 0 | 0 0 | 0 0 | 0 0 | 12.98 |
| IPR009800 | 1 | 22 0 0  | 0 0 | 1 1 | 0 0 | 0 0 | 0 0 | 84.64 |
| IPR009836 | 1 | 99 0 0  | 0 0 | 0 0 | 0 0 | 1 1 | 0 0 | 21    |
| IPR009846 | 1 | 72 0 0  | 0 0 | 1 1 | 0 0 | 0 0 | 0 0 | 54.81 |
| IPR009852 | 1 | 47 0 0  | 0 0 | 1 1 | 0 0 | 0 0 | 0 0 | 38.63 |
| IPR009869 | 1 | 14 0 0  | 0 0 | 0 0 | 0 0 | 1 1 | 0 0 | 55.88 |
| IPR009890 | 1 | 49 0 0  | 0 0 | 0 0 | 0 0 | 1 1 | 0 0 | 32.05 |
| IPR009899 | 1 | 78 2 2  | 0 0 | 0 0 | 0 0 | 0 0 | 0 0 | 22.55 |
| IPR009902 | 1 | 43 0 0  | 0 0 | 1 1 | 0 0 | 0 0 | 0 0 | 32.19 |
| IPR009926 | 1 | 111 1 1 | 0 0 | 0 0 | 0 0 | 0 0 | 0 0 | 29.78 |
| IPR009945 | 1 | 64 1 1  | 0 0 | 0 0 | 0 0 | 0 0 | 0 0 | 40.74 |
| IPR009960 | 1 | 6 0 0   | 0 0 | 0 0 | 1 1 | 0 0 | 0 0 | 35.47 |
| IPR010017 | 1 | 218 1 1 | 0 0 | 0 0 | 0 0 | 0 0 | 0 0 | 36.27 |
| IPR010111 | 1 | 10 0 0  | 0 0 | 0 0 | 0 0 | 0 0 | 1 1 | 29.09 |
| IPR010152 | 1 | 89 1 1  | 0 0 | 0 0 | 0 0 | 0 0 | 0 0 | 45.38 |
| IPR010235 | 1 | 124 1 1 | 0 0 | 0 0 | 0 0 | 0 0 | 0 0 | 25.59 |
| IPR010265 | 1 | 120 1 1 | 0 0 | 0 0 | 0 0 | 0 0 | 0 0 | 35.87 |
| IPR010268 | 1 | 165 0 0 | 1 1 | 0 0 | 0 0 | 0 0 | 0 0 | 15.18 |
| IPR010269 | 1 | 308 1 1 | 0 0 | 0 0 | 0 0 | 0 0 | 0 0 | 38.2  |
| IPR010279 | 1 | 370 1 1 | 0 0 | 0 0 | 0 0 | 0 0 | 0 0 | 21.13 |
| IPR010284 | 1 | 25 1 1  | 0 0 | 0 0 | 0 0 | 0 0 | 0 0 | 48.98 |
| IPR010287 | 1 | 316 1 1 | 0 0 | 0 0 | 0 0 | 0 0 | 0 0 | 26.29 |
| IPR010300 | 1 | 268 0 0 | 0 0 | 1 1 | 0 0 | 0 0 | 0 0 | 19.13 |
| IPR010301 | 1 | 87 0 0  | 0 0 | 0 0 | 0 0 | 1 1 | 0 0 | 27.64 |
| IPR010312 | 1 | 127 1 1 | 0 0 | 0 0 | 0 0 | 0 0 | 0 0 | 46.12 |
| IPR010315 | 1 | 111 1 1 | 0 0 | 0 0 | 0 0 | 0 0 | 0 0 | 24    |
| IPR010324 | 1 | 17 1 1  | 0 0 | 0 0 | 0 0 | 0 0 | 0 0 | 48.86 |
| IPR010334 | 1 | 102 0 0 | 0 0 | 0 0 | 0 0 | 1 1 | 0 0 | 33.65 |
| IPR010346 | 1 | 20 1 1  | 0 0 | 0 0 | 0 0 | 0 0 | 0 0 | 31.39 |
| IPR010351 | 1 | 73 1 1  | 0 0 | 0 0 | 0 0 | 0 0 | 0 0 | 42.96 |
| IPR010357 | 1 | 66 0 0  | 0 0 | 0 0 | 1 1 | 0 0 | 0 0 | 33.52 |
| IPR010378 | 1 | 61 0 0  | 0 0 | 0 0 | 0 0 | 1 1 | 0 0 | 33.1  |
| IPR010380 | 1 | 153 1 1 | 0 0 | 0 0 | 0 0 | 0 0 | 0 0 | 22.1  |
| IPR010382 | 1 | 52 1 1  | 0 0 | 0 0 | 0 0 | 0 0 | 0 0 | 45.7  |
| IPR010384 | 1 | 199 1 1 | 0 0 | 0 0 | 0 0 | 0 0 | 0 0 | 28.12 |
| IPR010385 | 1 | 121 1 1 | 0 0 | 0 0 | 0 0 | 0 0 | 0 0 | 23.39 |
| IPR010388 | 1 | 101 1 1 | 0 0 | 0 0 | 0 0 | 0 0 | 0 0 | 32.11 |
| IPR010389 | 1 | 126 1 1 | 0 0 | 0 0 | 0 0 | 0 0 | 0 0 | 39.28 |
| IPR010406 | 1 | 169 1 1 | 0 0 | 0 0 | 0 0 | 0 0 | 0 0 | 31.81 |
| IPR010413 | 1 | 76 1 1  | 0 0 | 0 0 | 0 0 | 0 0 | 0 0 | 41.01 |
| IPR010415 | 1 | 116 1 1 | 0 0 | 0 0 | 0 0 | 0 0 | 0 0 | 31.88 |
| IPR010442 | 1 | 141 0 0 | 0 0 | 0 0 | 0 0 | 0 0 | 1 1 | 38.47 |
| IPR010449 | 1 | 43 0 0  | 0 0 | 0 0 | 0 0 | 0 0 | 1 1 | 57.21 |
| IPR010461 | 1 | 91 1 1  | 0 0 | 0 0 | 0 0 | 0 0 | 0 0 | 19.85 |
| IPR010468 | 1 | 28 0 0  | 0 0 | 0 0 | 0 0 | 0 0 | 1 1 | 41.7  |
| IPR010471 | 1 | 30 0 0  | 0 0 | 1 1 | 0 0 | 0 0 | 0 0 | 50.6  |
| IPR010474 | 1 | 29 0 0  | 0 0 | 0 0 | 0 0 | 1 1 | 0 0 | 40.1  |
| IPR010483 | 1 | 33 0 0  | 0 0 | 0 0 | 0 0 | 0 0 | 1 1 | 49.27 |
| IPR010487 | 1 | 55 0 0  | 0 0 | 0 0 | 0 0 | 1 1 | 0 0 | 29.81 |
| IPR010490 | 1 | 77 0 0  | 0 0 | 0 0 | 0 0 | 1 1 | 0 0 | 28.29 |
| IPR010527 | 1 | 31 1 1  | 0 0 | 0 0 | 0 0 | 0 0 | 0 0 | 41.98 |
| IPR010533 | 1 | 6 0 0   | 0 0 | 0 0 | 0 0 | 0 0 | 1 1 | 73.62 |
| IPR010536 | 1 | 29 0 0  | 0 0 | 0 0 | 0 0 | 1 1 | 0 0 | 56.25 |
| IPR010542 | 1 | 34 0 0  | 0 0 | 0 0 | 0 0 | 0 0 | 1 1 | 30.1  |
| IPR010551 | 1 | 40 1 1  | 0 0 | 0 0 | 0 0 | 0 0 | 0 0 | 23.53 |
| IPR010555 | 1 | 5 0 0   | 0 0 | 0 0 | 0 0 | 0 0 | 1 1 | 63.63 |
| IPR010562 | 1 | 488 0 0 | 0 0 | 0 0 | 0 0 | 0 0 | 1 1 | 11.39 |
| IPR010581 | 1 | 19 1 1  | 0 0 | 0 0 | 0 0 | 0 0 | 0 0 | 33.8  |
| IPR010583 | 1 | 319 1 1 | 0 0 | 0 0 | 0 0 | 0 0 | 0 0 | 10.06 |
| IPR010585 | 1 | 41 0 0  | 0 0 | 0 0 | 0 0 | 0 0 | 1 1 | 17.86 |
| IPR010588 | 1 | 4 0 0   | 0 0 | 1 1 | 0 0 | 0 0 | 0 0 | 64.35 |
| IPR010602 | 1 | 22 1 1  | 0 0 | 0 0 | 0 0 | 0 0 | 0 0 | 20    |
| IPR010607 | 1 | 51 1 1  | 0 0 | 0 0 | 0 0 | 0 0 | 0 0 | 35.44 |
| IPR010608 | 1 | 16 0 0  | 0 0 | 1 1 | 0 0 | 0 0 | 0 0 | 56.15 |
| IPR010613 | 1 | 76 0 0  | 0 0 | 2 1 | 1 0 | 1 0 | 1 0 | 47.68 |
| IPR010627 | 1 | 462 1 0 | 0 0 | 1 0 | 0 0 | 0 0 | 0 0 | 38.58 |
| IPR010630 | 1 | 317 0 0 | 0 0 | 0 0 | 0 0 | 0 0 | 1 1 | 46.68 |
| IPR010640 | 1 | 155 1 1 | 0 0 | 0 0 | 0 0 | 0 0 | 0 0 | 12.82 |
| IPR010644 | 1 | 162 0 0 | 1 1 | 0 0 | 0 0 | 0 0 | 0 0 | 33.28 |
| IPR010648 | 1 | 142 1 1 | 0 0 | 0 0 | 0 0 | 0 0 | 0 0 | 47.86 |
| IPR010650 | 1 | 287 1 0 | 1 0 | 0 0 | 0 0 | 0 0 | 0 0 | 48.78 |
| IPR010651 | 1 | 138 0 0 | 0 0 | 0 0 | 0 0 | 0 0 | 0 0 | 38.98 |
| IPR010667 | 1 | 18 1 1  | 0 0 | 0 0 | 0 0 | 0 0 | 0 0 | 11.52 |
| IPR010672 | 1 | 54 0 0  | 1 1 | 0 0 | 0 0 | 0 0 | 0 0 | 41.76 |
| IPR010673 | 1 | 147 1 1 | 0 0 | 0 0 | 0 0 | 0 0 | 0 0 | 28.93 |
| IPR010678 | 1 | 80 0 0  | 0 0 | 1 1 | 0 0 | 0 0 | 0 0 | 38.37 |
| IPR010719 | 1 | 158 1 1 | 0 0 | 0 0 | 0 0 | 0 0 | 0 0 | 40.8  |
| IPR010724 | 1 | 66 1 1  | 0 0 | 0 0 | 0 0 | 0 0 | 0 0 | 42.96 |
| IPR010727 | 1 | 122 1 1 | 0 0 | 0 0 | 0 0 | 0 0 | 0 0 | 26.56 |
| IPR010732 | 1 | 274 1 1 | 0 0 | 0 0 | 0 0 | 0 0 | 0 0 | 18.64 |
| IPR010752 | 1 | 184 1 1 | 0 0 | 0 0 | 0 0 | 0 0 | 0 0 | 20.18 |
| IPR010758 | 1 | 129 2 2 | 0 0 | 0 0 | 0 0 | 0 0 | 0 0 | 59.81 |
| IPR010764 | 1 | 6 0 0   | 0 0 | 0 0 | 0 0 | 0 0 | 1 1 | 50.58 |
| IPR010780 | 1 | 165 1 1 | 0 0 | 0 0 | 0 0 | 0 0 | 0 0 | 39.27 |
| IPR010801 | 1 | 19 1 1  | 0 0 | 0 0 | 0 0 | 0 0 | 0 0 | 50.12 |
| IPR010824 | 1 | 122 1 1 | 0 0 | 0 0 | 0 0 | 0 0 | 0 0 | 28.44 |
| IPR010835 | 1 | 155 0 0 | 0 0 | 0 0 | 0 0 | 0 0 | 2 2 | 24.47 |
| IPR010836 | 1 | 102 1 1 | 0 0 | 0 0 | 0 0 | 0 0 | 0 0 | 23.09 |
| IPR010843 | 1 | 60 1 1  | 0 0 | 0 0 | 0 0 | 0 0 | 0 0 | 57.5  |
| IPR010845 | 1 | 84 1 1  | 0 0 | 0 0 | 0 0 | 0 0 | 0 0 | 24.21 |
| IPR010846 | 1 | 64 1 1  | 0 0 | 0 0 | 0 0 | 0 0 | 0 0 | 33.26 |
| IPR010852 | 1 | 229 1 1 | 0 0 | 0 0 | 0 0 | 0 0 | 0 0 | 15.53 |
| IPR010853 | 1 | 542 1 1 | 0 0 | 0 0 | 0 0 | 0 0 | 0 0 | 52.84 |
| IPR010858 | 1 | 72 1 1  | 0 0 | 0 0 | 0 0 | 0 0 | 0 0 | 54.17 |
| IPR010870 | 1 | 198 1 1 | 0 0 | 0 0 | 0 0 | 0 0 | 0 0 | 8.92  |
| IPR010872 | 1 | 124 1 1 | 0 0 | 0 0 | 0 0 | 0 0 | 0 0 | 9.09  |
| IPR010894 | 1 | 98 1 1  | 0 0 | 0 0 | 0 0 | 0 0 | 0 0 | 52.59 |
| IPR010906 | 1 | 89 1 1  | 0 0 | 0 0 | 0 0 | 0 0 | 0 0 | 31.77 |
| IPR010907 | 1 | 22 1 1  | 0 0 | 0 0 | 0 0 | 0 0 | 0 0 | 59.44 |
| IPR010908 | 1 | 16 0 0  | 0 0 | 2 2 | 0 0 | 0 0 | 0 0 | 17.65 |
| IPR010931 | 1 | 8 1 1   | 0 0 | 0 0 | 0 0 | 0 0 | 0 0 | 57.34 |
| IPR010933 | 1 | 293 0 0 | 0 0 | 0 0 | 0 0 | 0 0 | 1 1 | 64.43 |
| IPR010981 | 1 | 38 1 1  | 0 0 | 0 0 | 0 0 | 0 0 | 0 0 | 52.72 |
| IPR011058 | 1 | 54 0 0  | 0 0 | 0 0 | 0 0 | 1 1 | 0 0 | 19.2  |
| IPR011094 | 1 | 112 1 1 | 0 0 | 0 0 | 0 0 | 0 0 | 0 0 | 30.96 |
| IPR011111 | 1 | 136 1 0 | 0 0 | 1 0 | 0 0 | 0 0 | 0 0 | 14.95 |
| IPR011120 | 1 | 45 1 0  | 0 0 | 0 0 | 0 0 | 1 0 | 0 0 | 65    |
| IPR011202 | 1 | 17 1 1  | 0 0 | 0 0 | 0 0 | 0 0 | 0 0 | 25.38 |
| IPR011215 | 1 |         |     |     |     |     |     |       |

|           |   |         |     |     |     |     |     |       |
|-----------|---|---------|-----|-----|-----|-----|-----|-------|
| IPRO11258 | 1 | 18 1 1  | 0 0 | 0 0 | 0 0 | 0 0 | 0 0 | 44.43 |
| IPRO11442 | 1 | 108 0 0 | 0 0 | 1 0 | 1 0 | 1 0 | 1 0 | 31.81 |
| IPRO11489 | 1 | 79 1 1  | 0 0 | 0 0 | 0 0 | 0 0 | 0 0 | 43.61 |
| IPRO11501 | 1 | 68 0 0  | 0 0 | 1 0 | 1 0 | 1 0 | 1 0 | 37.82 |
| IPRO11516 | 1 | 37 0 0  | 0 0 | 0 0 | 0 0 | 1 0 | 2 1 | 36.59 |
| IPRO11518 | 1 | 43 1 1  | 0 0 | 0 0 | 0 0 | 0 0 | 0 0 | 24.77 |
| IPRO11522 | 1 | 38 1 1  | 0 0 | 0 0 | 0 0 | 0 0 | 0 0 | 22.85 |
| IPRO11526 | 1 | 22 0 0  | 0 0 | 0 0 | 0 0 | 0 0 | 1 1 | 59.63 |
| IPRO11606 | 1 | 544 1 1 | 0 0 | 0 0 | 0 0 | 0 0 | 0 0 | 20.16 |
| IPRO11632 | 1 | 48 1 1  | 0 0 | 0 0 | 0 0 | 0 0 | 0 0 | 39.6  |
| IPRO11636 | 1 | 18 1 1  | 0 0 | 0 0 | 0 0 | 0 0 | 0 0 | 31.46 |
| IPRO11638 | 1 | 86 1 1  | 0 0 | 0 0 | 0 0 | 0 0 | 0 0 | 77.95 |
| IPRO11664 | 1 | 179 2 2 | 0 0 | 0 0 | 0 0 | 0 0 | 0 0 | 13.12 |
| IPRO11670 | 1 | 47 1 1  | 0 0 | 0 0 | 0 0 | 0 0 | 0 0 | 48.28 |
| IPRO11671 | 1 | 55 0 0  | 0 0 | 0 0 | 0 0 | 0 0 | 1 1 | 45.38 |
| IPRO11673 | 1 | 83 1 1  | 0 0 | 0 0 | 0 0 | 0 0 | 0 0 | 63.57 |
| IPRO11674 | 1 | 49 0 0  | 1 1 | 0 0 | 0 0 | 0 0 | 0 0 | 21.85 |
| IPRO11687 | 1 | 81 0 0  | 0 0 | 0 0 | 0 0 | 1 1 | 0 0 | 22.79 |
| IPRO11710 | 1 | 95 0 0  | 0 0 | 1 0 | 1 0 | 1 0 | 1 0 | 49.27 |
| IPRO11855 | 1 | 58 1 1  | 0 0 | 0 0 | 0 0 | 0 0 | 0 0 | 7.68  |
| IPRO11986 | 1 | 76 1 1  | 0 0 | 0 0 | 0 0 | 0 0 | 0 0 | 25.59 |
| IPRO11987 | 1 | 61 0 0  | 0 0 | 1 0 | 1 0 | 1 0 | 1 0 | 46.8  |
| IPRO12386 | 1 | 36 1 1  | 0 0 | 0 0 | 0 0 | 1 1 | 0 0 | 15.15 |
| IPRO12417 | 1 | 53 0 0  | 0 0 | 1 1 | 0 0 | 0 0 | 0 0 | 25.43 |
| IPRO12425 | 1 | 169 1 0 | 1 0 | 1 0 | 0 0 | 0 0 | 0 0 | 59.36 |
| IPRO12431 | 1 | 47 0 0  | 2 2 | 0 0 | 0 0 | 0 0 | 0 0 | 32.63 |
| IPRO12435 | 1 | 24 0 0  | 0 0 | 0 0 | 0 0 | 0 0 | 1 1 | 36.53 |
| IPRO12446 | 1 | 47 0 0  | 0 0 | 0 0 | 0 0 | 0 0 | 1 1 | 59.3  |
| IPRO12452 | 1 | 114 1 1 | 0 0 | 0 0 | 0 0 | 0 0 | 0 0 | 35.33 |
| IPRO12461 | 1 | 38 0 0  | 0 0 | 0 0 | 0 0 | 0 0 | 1 1 | 31.71 |
| IPRO12481 | 1 | 7 1 1   | 0 0 | 0 0 | 0 0 | 0 0 | 0 0 | 55.73 |
| IPRO12486 | 1 | 64 0 0  | 0 0 | 0 0 | 1 0 | 1 0 | 1 0 | 26.13 |
| IPRO12492 | 1 | 44 0 0  | 0 0 | 1 0 | 0 0 | 0 0 | 1 0 | 64.13 |
| IPRO12505 | 1 | 517 1 1 | 0 0 | 0 0 | 0 0 | 0 0 | 0 0 | 10.08 |
| IPRO12507 | 1 | 178 1 1 | 0 0 | 0 0 | 0 0 | 0 0 | 0 0 | 23.62 |
| IPRO12510 | 1 | 162 0 0 | 0 0 | 0 0 | 0 0 | 0 0 | 1 1 | 48.27 |
| IPRO12544 | 1 | 147 1 1 | 0 0 | 0 0 | 0 0 | 0 0 | 0 0 | 33.2  |
| IPRO12547 | 1 | 119 1 0 | 0 0 | 1 0 | 1 0 | 0 0 | 1 0 | 22.55 |
| IPRO12548 | 1 | 96 1 1  | 0 0 | 0 0 | 0 0 | 0 0 | 0 0 | 23.87 |
| IPRO12549 | 1 | 321 1 1 | 0 0 | 0 0 | 0 0 | 0 0 | 0 0 | 17.66 |
| IPRO12558 | 1 | 6 1 1   | 0 0 | 0 0 | 0 0 | 0 0 | 0 0 | 70.27 |
| IPRO12578 | 1 | 25 0 0  | 0 0 | 0 0 | 0 0 | 1 1 | 0 0 | 40.97 |
| IPRO12583 | 1 | 8 0 0   | 0 0 | 0 0 | 0 0 | 0 0 | 1 1 | 75.11 |
| IPRO12599 | 1 | 112 0 0 | 0 0 | 1 0 | 1 0 | 0 0 | 1 0 | 37.66 |
| IPRO12604 | 1 | 30 0 0  | 0 0 | 0 0 | 0 0 | 0 0 | 1 1 | 57.96 |
| IPRO12643 | 1 | 11 0 0  | 0 0 | 0 0 | 0 0 | 0 0 | 0 0 | 65.65 |
| IPRO12652 | 1 | 66 1 1  | 0 0 | 0 0 | 0 0 | 0 0 | 0 0 | 41.66 |
| IPRO12812 | 1 | 11 1 1  | 0 0 | 0 0 | 0 0 | 0 0 | 0 0 | 52.32 |
| IPRO12848 | 1 | 176 0 0 | 0 0 | 0 0 | 0 0 | 0 0 | 1 1 | 34.34 |
| IPRO12852 | 1 | 43 0 0  | 0 0 | 0 0 | 0 0 | 1 1 | 1 1 | 34.82 |
| IPRO12853 | 1 | 64 1 1  | 0 0 | 0 0 | 0 0 | 0 0 | 0 0 | 12.24 |
| IPRO12860 | 1 | 55 0 0  | 0 0 | 0 0 | 0 0 | 0 0 | 1 1 | 28.06 |
| IPRO12861 | 1 | 77 0 0  | 1 1 | 0 0 | 0 0 | 0 0 | 0 0 | 27.14 |
| IPRO12876 | 1 | 77 0 0  | 0 0 | 1 1 | 0 0 | 0 0 | 0 0 | 45.72 |
| IPRO12880 | 1 | 64 0 0  | 0 0 | 1 0 | 1 0 | 1 0 | 1 0 | 22.91 |
| IPRO12883 | 1 | 22 0 0  | 0 0 | 0 0 | 0 0 | 1 0 | 1 0 | 55.57 |
| IPRO12899 | 1 | 237 1 1 | 0 0 | 0 0 | 0 0 | 0 0 | 0 0 | 29.91 |
| IPRO12906 | 1 | 122 1 0 | 1 0 | 0 0 | 0 0 | 0 0 | 0 0 | 29.23 |
| IPRO12909 | 1 | 160 1 1 | 0 0 | 0 0 | 0 0 | 0 0 | 0 0 | 57.7  |
| IPRO12911 | 1 | 83 0 0  | 0 0 | 0 0 | 0 0 | 0 0 | 1 1 | 45.14 |
| IPRO12926 | 1 | 58 0 0  | 0 0 | 1 1 | 0 0 | 0 0 | 0 0 | 37.84 |
| IPRO12933 | 1 | 348 1 1 | 0 0 | 0 0 | 0 0 | 0 0 | 0 0 | 22.88 |
| IPRO12935 | 1 | 63 0 0  | 0 0 | 1 0 | 0 0 | 1 0 | 1 0 | 26.92 |
| IPRO12940 | 1 | 39 0 0  | 0 0 | 1 1 | 0 0 | 0 0 | 0 0 | 35.47 |
| IPRO12942 | 1 | 94 0 0  | 0 0 | 1 1 | 0 0 | 0 0 | 0 0 | 24.6  |
| IPRO12959 | 1 | 56 0 0  | 0 0 | 1 0 | 0 0 | 1 0 | 1 0 | 22.43 |
| IPRO12963 | 1 | 136 1 1 | 0 0 | 0 0 | 0 0 | 0 0 | 0 0 | 21.66 |
| IPRO12966 | 1 | 31 0 0  | 0 0 | 0 0 | 0 0 | 1 1 | 0 0 | 39.93 |
| IPRO12980 | 1 | 14 0 0  | 0 0 | 0 0 | 0 0 | 0 0 | 1 1 | 58.16 |
| IPRO12996 | 1 | 28 0 0  | 0 0 | 0 0 | 0 0 | 0 0 | 1 1 | 76.12 |
| IPRO13086 | 1 | 11 0 0  | 0 0 | 0 0 | 0 0 | 0 0 | 1 1 | 73.75 |
| IPRO13100 | 1 | 96 1 1  | 0 0 | 0 0 | 0 0 | 0 0 | 0 0 | 13.23 |
| IPRO13134 | 1 | 5 1 0   | 0 0 | 1 0 | 0 0 | 0 0 | 0 0 | 14.78 |
| IPRO13146 | 1 | 29 0 0  | 0 0 | 0 0 | 0 0 | 0 0 | 2 2 | 81.83 |
| IPRO13147 | 1 | 15 0 0  | 0 0 | 0 0 | 0 0 | 0 0 | 1 1 | 57.13 |
| IPRO13158 | 1 | 113 0 0 | 0 0 | 0 0 | 0 0 | 0 0 | 1 1 | 35.67 |
| IPRO13166 | 1 | 94 1 1  | 0 0 | 0 0 | 0 0 | 0 0 | 0 0 | 54.31 |
| IPRO13174 | 1 | 61 0 0  | 0 0 | 0 0 | 0 0 | 0 0 | 1 1 | 32.17 |
| IPRO13175 | 1 | 27 0 0  | 0 0 | 0 0 | 0 0 | 1 2 | 0 0 | 28.95 |
| IPRO13215 | 1 | 469 1 0 | 1 0 | 1 0 | 0 0 | 1 0 | 0 0 | 36.61 |
| IPRO13218 | 1 | 41 0 0  | 0 0 | 0 0 | 0 0 | 1 1 | 0 0 | 26.44 |
| IPRO13260 | 1 | 79 0 0  | 0 0 | 1 0 | 1 0 | 0 0 | 0 0 | 34.78 |
| IPRO13262 | 1 | 25 0 0  | 0 0 | 0 0 | 0 0 | 1 1 | 0 0 | 61.41 |
| IPRO13347 | 1 | 17 0 0  | 1 1 | 0 0 | 0 0 | 0 0 | 0 0 | 34.81 |
| IPRO13381 | 1 | 96 2 2  | 0 0 | 0 0 | 0 0 | 0 0 | 0 0 | 13.52 |
| IPRO13390 | 1 | 17 1 1  | 0 0 | 0 0 | 0 0 | 0 0 | 0 0 | 27.03 |
| IPRO13443 | 1 | 7 1 1   | 0 0 | 0 0 | 0 0 | 0 0 | 0 0 | 35.11 |
| IPRO13527 | 1 | 449 1 1 | 0 0 | 0 0 | 0 0 | 0 0 | 0 0 | 21.51 |
| IPRO13545 | 1 | 388 1 1 | 0 0 | 0 0 | 0 0 | 0 0 | 0 0 | 30.45 |
| IPRO13551 | 1 | 452 1 1 | 0 0 | 0 0 | 0 0 | 0 0 | 0 0 | 49.04 |
| IPRO13558 | 1 | 97 0 0  | 0 0 | 0 0 | 0 0 | 1 1 | 0 0 | 48.72 |
| IPRO13561 | 1 | 35 0 0  | 1 1 | 0 0 | 0 0 | 0 0 | 0 0 | 29.49 |
| IPRO13570 | 1 | 184 1 1 | 0 0 | 0 0 | 0 0 | 0 0 | 0 0 | 8.85  |
| IPRO13571 | 1 | 45 1 1  | 0 0 | 0 0 | 0 0 | 0 0 | 0 0 | 24.28 |
| IPRO13572 | 1 | 220 1 0 | 1 0 | 1 0 | 0 0 | 0 0 | 0 0 | 24.74 |
| IPRO13576 | 1 | 17 0 0  | 0 0 | 0 0 | 0 0 | 1 1 | 0 0 | 57.63 |
| IPRO13588 | 1 | 7 0 0   | 0 0 | 0 0 | 0 0 | 0 0 | 1 1 | 35.44 |
| IPRO13592 | 1 | 30 0 0  | 0 0 | 0 0 | 0 0 | 0 0 | 2 2 | 55.94 |
| IPRO13599 | 1 | 111 0 0 | 0 0 | 0 0 | 0 0 | 1 0 | 1 0 | 25.57 |
| IPRO13612 | 1 | 31 0 0  | 0 0 | 0 0 | 0 0 | 0 0 | 1 1 | 36.8  |
| IPRO13619 | 1 | 96 1 1  | 0 0 | 0 0 | 0 0 | 0 0 | 0 0 | 40.74 |
| IPRO13620 | 1 | 184 1 1 | 0 0 | 0 0 | 0 0 | 0 0 | 0 0 | 37.22 |
| IPRO13622 | 1 | 157 1 1 | 0 0 | 0 0 | 0 0 | 0 0 | 0 0 | 56.11 |
| IPRO13626 | 1 | 108 1 0 | 0 0 | 1 0 | 0 0 | 0 0 | 0 0 | 24.03 |
| IPRO13645 | 1 | 100 1 1 | 0 0 | 0 0 | 0 0 | 0 0 | 0 0 | 32.57 |
| IPRO13647 | 1 | 431 1 0 | 1 0 | 0 0 | 0 0 | 0 0 | 0 0 | 15.32 |
| IPRO13652 | 1 | 15 0 0  | 0 0 | 0 0 | 0 0 | 0 0 | 1 1 | 40.89 |
| IPRO13665 | 1 | 33 0 0  | 0 0 | 0 0 | 1 1 | 0 0 | 0 0 | 18.82 |
| IPRO13666 | 1 | 60 0 0  | 0 0 | 1 1 | 0 0 | 0 0 | 0 0 | 36.88 |
| IPRO13673 | 1 | 21 0 0  | 0 0 | 0 0 | 0 0 | 0 0 | 1 1 | 82.28 |
| IPRO13675 | 1 | 143 1 1 | 0 0 | 0 0 | 0 0 | 0 0 | 0 0 | 35.65 |
| IPRO13679 | 1 | 29 0 0  | 0 0 | 1 1 | 0 0 | 0 0 | 0 0 | 41.45 |
| IPRO13681 | 1 | 20 0 0  | 0 0 | 0 0 | 0 0 | 0 0 | 1 1 | 56.91 |
| IPRO13692 | 1 | 73 1 1  | 0 0 | 0 0 | 0 0 | 0 0 | 0 0 | 54.31 |
| IPRO13696 | 1 | 68 0 0  | 1 1 | 0 0 | 0 0 | 0 0 | 0 0 | 20.87 |
| IPRO13711 | 1 | 45 0 0  | 0 0 | 0 0 | 0 0 | 0 0 | 1 1 | 70.57 |
| IPRO13714 | 1 | 38 0 0  | 0 0 | 0 0 | 0 0 | 1 1 | 0 0 | 31.04 |
| IPRO13728 | 1 | 19 1 1  | 0 0 | 0 0 | 0 0 | 0 0 | 0 0 | 17.65 |
| IPRO13729 | 1 | 89 0 0  | 0 0 | 1 0 | 1 0 | 1 0 | 1 0 | 39.97 |
| IPRO13769 | 1 | 162 0 0 | 0 0 | 0 0 | 0 0 | 0 0 | 1 1 | 40.97 |
| IPRO13851 | 1 | 30 0 0  | 0 0 | 0 0 | 0 0 | 0 0 | 1 1 | 57.36 |
| IPRO13859 | 1 | 25 0 0  | 0 0 | 0 0 | 0 0 | 1 1 | 0 0 | 42.12 |
| IPRO13863 | 1 | 57 0 0  | 0 0 | 0 0 | 0 0 | 1 1 | 0 0 | 36.67 |
| IPRO13871 | 1 | 27 0 0  | 0 0 | 0 0 | 0 0 | 0 0 | 1 1 | 56.03 |
| IPRO13876 | 1 | 59 0 0  | 0 0 | 0 0 | 0 0 | 0 0 | 0 0 | 33.03 |
| IPRO13879 | 1 | 18 0 0  | 0 0 | 0 0 | 0 0 | 1 1 | 0 0 | 82.12 |
| IPRO13880 | 1 | 76 0 0  | 0 0 | 0 0 | 0 0 | 0 0 | 1 1 | 45.55 |
| IPRO13886 | 1 | 54 0 0  | 0 0 | 1 0 | 0 0 | 1 0 | 1 0 | 38.48 |
| IPRO13889 | 1 | 29 0 0  | 0 0 | 0 0 | 0 0 | 1 1 | 0 0 | 36.16 |
| IPRO13893 | 1 | 37 0 0  | 0 0 | 0 0 | 0 0 | 0 0 | 1 1 | 23.2  |
| IPRO13909 | 1 | 39 0 0  | 0 0 | 0 0 | 1 0 | 1 0 | 0 0 | 28.82 |
| IPRO13910 | 1 | 37 0 0  | 0 0 | 0 0 | 0 0 | 1 1 | 0 0 | 28.82 |
| IPRO13912 | 1 | 13 0 0  | 0 0 | 0 0 | 1 0 | 1 0 | 1 0 | 31.97 |
| IPRO13913 | 1 | 6 0 0   | 0 0 | 0 0 | 0 0 | 0 0 | 2 2 | 59.39 |
| IPRO13926 | 1 | 89 0 0  | 1 1 | 0 0 | 0 0 | 0 0 | 0 0 | 18.14 |
| IPRO13928 | 1 | 26 0 0  | 0 0 | 0 0 | 0 0 | 1 1 | 0 0 | 30.24 |
| IPRO13931 | 1 | 37 0 0  | 0 0 | 0 0 | 1 1 | 0 0 | 0 0 | 44.92 |
| IPRO13944 | 1 | 7 1 0   | 0 0 | 0 0 | 0 0 | 1 0 | 0 0 | 43.19 |
| IPRO13949 | 1 | 76 0 0  | 0 0 | 1 0 | 0 0 | 2 1 | 0 0 | 30.52 |
| IPRO13959 | 1 | 18 0 0  | 0 0 | 0 0 | 0 0 | 1 1 | 0 0 | 57.29 |
| IPRO13970 | 1 | 75 0 0  | 0 0 | 1 1 | 0 0 | 0 0 | 1 1 | 17.11 |
| IPRO13971 | 1 | 23 0 0  | 1 1 | 0 0 | 0 0 | 0 0 | 0 0 | 24.35 |
| IPRO13972 | 1 | 50 1 1  | 0 0 | 0 0 | 0 0 | 0 0 | 0 0 | 44.79 |
| IPRO13975 | 1 | 44 1 1  | 0 0 | 0 0 | 0 0 | 0 0 | 0 0 | 43.92 |
| IPRO13991 | 1 | 26 1 1  | 0 0 | 0 0 | 0 0 | 0 0 | 0 0 | 54.06 |
| IPRO14003 | 1 | 19 0 0  | 0 0 | 0 0 | 0 0 | 0 0 | 1 1 | 43.32 |
| IPRO14112 | 1 | 10 0 0  | 0 0 | 1 1 | 0 0 | 0 0 | 0 0 | 58.4  |

|           |   |         |     |     |     |     |     |       |
|-----------|---|---------|-----|-----|-----|-----|-----|-------|
| IPR014123 | 1 | 44 0 0  | 0 0 | 1 1 | 0 0 | 0 0 | 0 0 | 44.82 |
| IPR014263 | 1 | 61 1 1  | 0 0 | 0 0 | 0 0 | 0 0 | 0 0 | 7.8   |
| IPR014406 | 1 | 5 1 1   | 0 0 | 0 0 | 0 0 | 0 0 | 0 0 | 37.41 |
| IPR014549 | 1 | 37 1 1  | 0 0 | 0 0 | 0 0 | 1 0 | 0 0 | 35.79 |
| IPR014567 | 1 | 34 1 1  | 0 0 | 0 0 | 0 0 | 0 0 | 0 0 | 27.84 |
| IPR014740 | 1 | 3 1 1   | 0 0 | 0 0 | 0 0 | 0 0 | 0 0 | 98.43 |
| IPR014760 | 1 | 125 0 0 | 0 0 | 0 0 | 0 0 | 0 0 | 1 1 | 24.2  |
| IPR014769 | 1 | 191 1 1 | 0 0 | 0 0 | 0 0 | 0 0 | 0 0 | 32.35 |
| IPR014771 | 1 | 10 0 0  | 0 0 | 0 0 | 0 0 | 1 1 | 0 0 | 99.1  |
| IPR014788 | 1 | 28 0 0  | 0 0 | 0 0 | 0 0 | 0 0 | 1 1 | 68.76 |
| IPR014789 | 1 | 17 0 0  | 0 0 | 0 0 | 0 0 | 0 0 | 1 1 | 63.53 |
| IPR014792 | 1 | 11 1 1  | 0 0 | 0 0 | 0 0 | 0 0 | 0 0 | 38.8  |
| IPR014795 | 1 | 224 1 1 | 0 0 | 0 0 | 0 0 | 0 0 | 0 0 | 23.84 |
| IPR014804 | 1 | 14 0 0  | 0 0 | 0 0 | 0 0 | 1 1 | 0 0 | 33.86 |
| IPR014825 | 1 | 80 0 0  | 0 0 | 1 1 | 0 0 | 0 0 | 0 0 | 38.9  |
| IPR014830 | 1 | 166 0 0 | 0 0 | 0 0 | 0 0 | 0 0 | 1 1 | 22.37 |
| IPR014839 | 1 | 33 0 0  | 0 0 | 0 0 | 0 0 | 1 1 | 0 0 | 22.15 |
| IPR014854 | 1 | 100 0 0 | 0 0 | 0 0 | 0 0 | 1 1 | 0 0 | 16.38 |
| IPR014863 | 1 | 99 0 0  | 0 0 | 1 0 | 1 0 | 1 0 | 1 0 | 40.38 |
| IPR014864 | 1 | 215 1 0 | 1 0 | 0 0 | 0 0 | 0 0 | 0 0 | 31.88 |
| IPR014866 | 1 | 48 1 1  | 0 0 | 0 0 | 0 0 | 0 0 | 0 0 | 68.74 |
| IPR014869 | 1 | 11 1 1  | 0 0 | 0 0 | 0 0 | 0 0 | 0 0 | 55.52 |
| IPR014873 | 1 | 85 0 0  | 0 0 | 0 0 | 0 0 | 0 0 | 1 1 | 52.07 |
| IPR014874 | 1 | 25 1 1  | 0 0 | 0 0 | 0 0 | 0 0 | 0 0 | 45.34 |
| IPR014879 | 1 | 78 1 1  | 0 0 | 0 0 | 0 0 | 0 0 | 0 0 | 67.22 |
| IPR014880 | 1 | 139 1 1 | 0 0 | 0 0 | 0 0 | 0 0 | 0 0 | 23.88 |
| IPR014881 | 1 | 76 0 0  | 0 0 | 0 0 | 1 0 | 1 0 | 0 0 | 42.33 |
| IPR014884 | 1 | 24 1 1  | 0 0 | 0 0 | 0 0 | 0 0 | 0 0 | 34.15 |
| IPR014892 | 1 | 98 0 0  | 0 0 | 1 0 | 1 0 | 1 0 | 1 0 | 16.79 |
| IPR014903 | 1 | 44 1 1  | 0 0 | 0 0 | 0 0 | 0 0 | 0 0 | 17.85 |
| IPR014911 | 1 | 59 1 1  | 0 0 | 0 0 | 0 0 | 0 0 | 0 0 | 21.47 |
| IPR014918 | 1 | 31 1 1  | 0 0 | 0 0 | 0 0 | 0 0 | 0 0 | 19.49 |
| IPR014919 | 1 | 40 1 1  | 0 0 | 0 0 | 0 0 | 0 0 | 0 0 | 44.45 |
| IPR014922 | 1 | 376 1 1 | 0 0 | 0 0 | 0 0 | 0 0 | 0 0 | 11.86 |
| IPR014923 | 1 | 43 0 0  | 1 1 | 0 0 | 0 0 | 0 0 | 0 0 | 37.11 |
| IPR014925 | 1 | 50 1 1  | 0 0 | 0 0 | 0 0 | 0 0 | 0 0 | 28.16 |
| IPR014932 | 1 | 28 0 0  | 0 0 | 0 0 | 0 0 | 0 0 | 2 2 | 45.57 |
| IPR014937 | 1 | 91 1 1  | 0 0 | 0 0 | 0 0 | 0 0 | 0 0 | 47.24 |
| IPR014957 | 1 | 115 1 1 | 0 0 | 0 0 | 0 0 | 0 0 | 0 0 | 29.88 |
| IPR014960 | 1 | 55 1 1  | 0 0 | 0 0 | 0 0 | 0 0 | 0 0 | 21.14 |
| IPR014961 | 1 | 32 1 1  | 0 0 | 0 0 | 0 0 | 0 0 | 0 0 | 30.57 |
| IPR014963 | 1 | 54 1 1  | 0 0 | 0 0 | 0 0 | 0 0 | 0 0 | 42    |
| IPR014968 | 1 | 58 1 1  | 0 0 | 0 0 | 0 0 | 0 0 | 0 0 | 41.16 |
| IPR014983 | 1 | 29 1 1  | 0 0 | 0 0 | 0 0 | 0 0 | 0 0 | 29.63 |
| IPR014991 | 1 | 71 1 1  | 0 0 | 0 0 | 0 0 | 0 0 | 0 0 | 30.94 |
| IPR014992 | 1 | 28 1 1  | 0 0 | 0 0 | 0 0 | 0 0 | 0 0 | 37.96 |
| IPR014994 | 1 | 29 1 1  | 0 0 | 0 0 | 0 0 | 0 0 | 0 0 | 53.17 |
| IPR014996 | 1 | 63 1 1  | 0 0 | 0 0 | 0 0 | 0 0 | 0 0 | 39.89 |
| IPR015002 | 1 | 30 1 1  | 0 0 | 0 0 | 0 0 | 0 0 | 0 0 | 25.73 |
| IPR015006 | 1 | 8 0 0   | 0 0 | 0 0 | 0 0 | 1 1 | 0 0 | 57.93 |
| IPR015013 | 1 | 15 0 0  | 0 0 | 0 0 | 0 0 | 0 0 | 2 2 | 74.18 |
| IPR015018 | 1 | 88 1 1  | 0 0 | 0 0 | 0 0 | 0 0 | 0 0 | 18.38 |
| IPR015024 | 1 | 20 1 1  | 0 0 | 0 0 | 0 0 | 0 0 | 0 0 | 23.3  |
| IPR015025 | 1 | 27 1 1  | 0 0 | 0 0 | 0 0 | 0 0 | 0 0 | 31.92 |
| IPR015026 | 1 | 31 1 1  | 0 0 | 0 0 | 0 0 | 0 0 | 0 0 | 74.56 |
| IPR015040 | 1 | 13 0 0  | 0 0 | 0 0 | 0 0 | 1 1 | 0 0 | 71.98 |
| IPR015050 | 1 | 29 1 1  | 0 0 | 0 0 | 0 0 | 0 0 | 0 0 | 50.06 |
| IPR015051 | 1 | 45 0 0  | 0 0 | 0 0 | 1 1 | 0 0 | 0 0 | 77.21 |
| IPR015057 | 1 | 30 1 1  | 0 0 | 0 0 | 0 0 | 0 0 | 0 0 | 43.62 |
| IPR015071 | 1 | 21 1 1  | 0 0 | 0 0 | 0 0 | 0 0 | 0 0 | 54.42 |
| IPR015073 | 1 | 40 1 1  | 0 0 | 0 0 | 0 0 | 0 0 | 0 0 | 36.56 |
| IPR015075 | 1 | 56 0 0  | 0 0 | 0 0 | 0 0 | 1 1 | 0 0 | 32.26 |
| IPR015076 | 1 | 10 0 0  | 0 0 | 0 0 | 0 0 | 0 0 | 1 1 | 53.38 |
| IPR015091 | 1 | 10 0 0  | 0 0 | 0 0 | 0 0 | 0 0 | 1 1 | 93.88 |
| IPR015093 | 1 | 46 0 0  | 1 1 | 0 0 | 0 0 | 0 0 | 0 0 | 12.57 |
| IPR015098 | 1 | 17 0 0  | 0 0 | 0 0 | 0 0 | 0 0 | 1 1 | 71.25 |
| IPR015103 | 1 | 13 1 1  | 0 0 | 0 0 | 0 0 | 0 0 | 0 0 | 58.82 |
| IPR015106 | 1 | 42 1 1  | 0 0 | 0 0 | 0 0 | 0 0 | 0 0 | 76.33 |
| IPR015109 | 1 | 23 1 1  | 0 0 | 0 0 | 0 0 | 0 0 | 0 0 | 34.23 |
| IPR015110 | 1 | 5 1 1   | 0 0 | 0 0 | 0 0 | 0 0 | 0 0 | 97.14 |
| IPR015111 | 1 | 55 1 1  | 0 0 | 0 0 | 0 0 | 0 0 | 0 0 | 36.88 |
| IPR015121 | 1 | 13 0 0  | 0 0 | 0 0 | 0 0 | 0 0 | 1 1 | 70.31 |
| IPR015125 | 1 | 13 0 0  | 0 0 | 0 0 | 0 0 | 1 1 | 0 0 | 55.73 |
| IPR015130 | 1 | 36 1 1  | 0 0 | 0 0 | 0 0 | 0 0 | 0 0 | 39.91 |
| IPR015132 | 1 | 8 0 0   | 0 0 | 0 0 | 0 0 | 0 0 | 1 1 | 72.07 |
| IPR015144 | 1 | 14 1 1  | 0 0 | 0 0 | 0 0 | 0 0 | 0 0 | 44.26 |
| IPR015158 | 1 | 60 0 0  | 0 0 | 0 0 | 0 0 | 1 1 | 0 0 | 36.4  |
| IPR015167 | 1 | 3 1 1   | 0 0 | 0 0 | 0 0 | 0 0 | 0 0 | 81.44 |
| IPR015222 | 1 | 76 0 0  | 0 0 | 0 0 | 0 0 | 1 1 | 0 0 | 34.75 |
| IPR015230 | 1 | 4 1 1   | 0 0 | 0 0 | 0 0 | 0 0 | 0 0 | 17.36 |
| IPR015233 | 1 | 36 1 1  | 0 0 | 0 0 | 0 0 | 0 0 | 0 0 | 41.63 |
| IPR015236 | 1 | 3 0 0   | 1 1 | 0 0 | 0 0 | 0 0 | 0 0 | 44.04 |
| IPR015239 | 1 | 3 1 1   | 0 0 | 0 0 | 0 0 | 0 0 | 0 0 | 99.24 |
| IPR015242 | 1 | 28 0 0  | 0 0 | 0 0 | 0 0 | 1 1 | 0 0 | 28.92 |
| IPR015247 | 1 | 7 0 0   | 0 0 | 0 0 | 0 0 | 1 1 | 0 0 | 73.33 |
| IPR015249 | 1 | 6 0 0   | 0 0 | 0 0 | 0 0 | 0 0 | 1 1 | 70.2  |
| IPR015259 | 1 | 32 1 1  | 0 0 | 0 0 | 0 0 | 0 0 | 0 0 | 47.93 |
| IPR015261 | 1 | 4 1 1   | 0 0 | 0 0 | 0 0 | 0 0 | 0 0 | 61.21 |
| IPR015265 | 1 | 129 1 1 | 0 0 | 0 0 | 0 0 | 0 0 | 0 0 | 54.55 |
| IPR015266 | 1 | 9 0 0   | 1 1 | 0 0 | 0 0 | 0 0 | 0 0 | 74.75 |
| IPR015275 | 1 | 13 0 0  | 0 0 | 0 0 | 0 0 | 1 1 | 0 0 | 64.09 |
| IPR015276 | 1 | 8 0 0   | 0 0 | 0 0 | 0 0 | 0 0 | 1 1 | 74.99 |
| IPR015282 | 1 | 140 1 1 | 0 0 | 0 0 | 0 0 | 0 0 | 0 0 | 33.05 |
| IPR015292 | 1 | 154 1 1 | 0 0 | 0 0 | 0 0 | 0 0 | 0 0 | 17.14 |
| IPR015294 | 1 | 21 1 1  | 0 0 | 0 0 | 0 0 | 0 0 | 0 0 | 68.98 |
| IPR015295 | 1 | 3 1 1   | 0 0 | 0 0 | 0 0 | 0 0 | 0 0 | 86.84 |
| IPR015300 | 1 | 12 1 1  | 0 0 | 0 0 | 0 0 | 0 0 | 0 0 | 38.7  |
| IPR015304 | 1 | 108 1 1 | 0 0 | 0 0 | 0 0 | 0 0 | 0 0 | 57.39 |
| IPR015310 | 1 | 115 0 0 | 0 0 | 1 0 | 1 0 | 1 0 | 1 0 | 26.27 |
| IPR015311 | 1 | 26 0 0  | 0 0 | 0 0 | 0 0 | 0 0 | 1 1 | 51.76 |
| IPR015316 | 1 | 3 0 0   | 0 0 | 0 0 | 0 0 | 1 1 | 0 0 | 65.36 |
| IPR015325 | 1 | 6 1 1   | 0 0 | 0 0 | 0 0 | 0 0 | 0 0 | 69.41 |
| IPR015327 | 1 | 16 0 0  | 0 0 | 0 0 | 0 0 | 0 0 | 1 1 | 77.27 |
| IPR015329 | 1 | 49 0 0  | 1 1 | 0 0 | 0 0 | 0 0 | 0 0 | 43.36 |
| IPR015331 | 1 | 3 1 1   | 0 0 | 0 0 | 0 0 | 0 0 | 0 0 | 98.75 |
| IPR015338 | 1 | 151 0 0 | 0 0 | 0 0 | 0 0 | 0 0 | 1 1 | 34.54 |
| IPR015345 | 1 | 94 1 0  | 0 0 | 1 0 | 0 0 | 0 0 | 0 0 | 37.64 |
| IPR015352 | 1 | 8 0 0   | 0 0 | 0 0 | 0 0 | 0 0 | 1 1 | 61.79 |
| IPR015381 | 1 | 49 0 0  | 0 0 | 0 0 | 0 0 | 0 0 | 0 0 | 14.64 |
| IPR015382 | 1 | 14 0 0  | 0 0 | 0 0 | 0 0 | 0 0 | 1 1 | 75.64 |
| IPR015397 | 1 | 167 1 1 | 0 0 | 0 0 | 0 0 | 0 0 | 0 0 | 11.59 |
| IPR015407 | 1 | 13 0 0  | 0 0 | 1 1 | 0 0 | 0 0 | 0 0 | 53.5  |
| IPR015409 | 1 | 111 1 1 | 0 0 | 0 0 | 0 0 | 0 0 | 0 0 | 65.36 |
| IPR015417 | 1 | 68 1 1  | 0 0 | 0 0 | 0 0 | 0 0 | 0 0 | 34.04 |
| IPR015426 | 1 | 166 1 1 | 0 0 | 0 0 | 0 0 | 0 0 | 0 0 | 59.95 |
| IPR015495 | 1 | 10 0 0  | 0 0 | 1 1 | 0 0 | 0 0 | 1 1 | 19.54 |
| IPR015649 | 1 | 29 0 0  | 0 0 | 0 0 | 0 0 | 0 0 | 1 1 | 45.27 |
| IPR015810 | 1 | 25 1 1  | 0 0 | 0 0 | 0 0 | 0 0 | 0 0 | 45.76 |
| IPR015853 | 1 | 24 1 1  | 0 0 | 0 0 | 0 0 | 0 0 | 0 0 | 40.24 |
| IPR015857 | 1 | 36 1 1  | 0 0 | 0 0 | 0 0 | 0 0 | 0 0 | 81.41 |
| IPR015858 | 1 | 36 1 1  | 0 0 | 0 0 | 0 0 | 0 0 | 0 0 | 75.22 |
| IPR015859 | 1 | 94 1 1  | 0 0 | 0 0 | 0 0 | 0 0 | 0 0 | 55.01 |
| IPR015879 | 1 | 330 1 0 | 1 0 | 1 0 | 0 0 | 0 0 | 0 0 | 15.05 |
| IPR015897 | 1 | 147 0 0 | 0 0 | 0 0 | 0 0 | 0 0 | 1 1 | 16.75 |
| IPR015938 | 1 | 16 0 0  | 0 0 | 0 0 | 0 0 | 0 0 | 1 1 | 49.87 |
| IPR016014 | 1 | 19 0 0  | 0 0 | 0 0 | 0 0 | 1 1 | 0 0 | 45.5  |
| IPR016015 | 1 | 21 0 0  | 0 0 | 0 0 | 0 0 | 0 0 | 1 1 | 41.94 |
| IPR016018 | 1 | 15 1 1  | 0 0 | 0 0 | 0 0 | 0 0 | 0 0 | 74.35 |
| IPR016019 | 1 | 24 1 1  | 0 0 | 0 0 | 0 0 | 0 0 | 0 0 | 56.99 |
| IPR016041 | 1 | 77 1 0  | 1 0 | 0 0 | 0 0 | 0 0 | 0 0 | 22.08 |
| IPR016054 | 1 | 80 0 0  | 0 0 | 0 0 | 0 0 | 0 0 | 1 1 | 18.93 |
| IPR016073 | 1 | 56 0 0  | 0 0 | 1 0 | 0 0 | 0 0 | 1 0 | 25.23 |
| IPR016097 | 1 | 35 1 1  | 0 0 | 0 0 | 0 0 | 0 0 | 0 0 | 17.45 |
| IPR016103 | 1 | 225 1 1 | 0 0 | 0 0 | 0 0 | 0 0 | 0 0 | 32.13 |
| IPR016179 | 1 | 246 0 0 | 0 0 | 0 0 | 0 0 | 0 0 | 3 3 | 19.94 |
| IPR016624 | 1 | 86 1 1  | 0 0 | 0 0 | 0 0 | 0 0 | 0 0 | 24.46 |
| IPR016755 | 1 | 59 1 1  | 0 0 | 0 0 | 0 0 | 0 0 | 0 0 | 48.11 |
| IPR016905 | 1 | 80 1 1  | 0 0 | 0 0 | 0 0 | 0 0 | 0 0 | 58.88 |
| IPR017136 | 1 | 81 1 1  | 0 0 | 0 0 | 0 0 | 0 0 | 0 0 | 63.64 |
| IPR017452 | 1 | 27 0 0  | 0 0 | 0 0 | 0 0 | 1 1 | 1 1 | 2.42  |
| IPR017483 | 1 | 50 1 1  | 0 0 | 0 0 | 0 0 | 0 0 | 0 0 | 38.09 |
| IPR017738 | 1 | 49 1 1  | 0 0 | 0 0 | 0 0 | 0 0 | 0 0 | 28.26 |
| IPR017906 | 1 | 6 0 0   | 0 0 | 0 0 | 0 0 | 0 0 | 0 0 | 15.6  |
| IPR017908 | 1 | 5 1 1   | 0 0 | 0 0 | 0 0 | 0 0 | 0 0 | 60.94 |
| IPR017932 | 1 | 97 0 0  | 1 1 | 0 0 | 0 0 | 0 0 | 0 0 | 13.57 |
| IPR017939 | 1 | 57 0 0  | 0 0 | 0 0 | 0 0 | 0 0 | 1 1 | 32.6  |
| IPR017942 | 1 | 145 0 0 | 0 0 | 1 0 | 0 0 |     |     |       |

|           |   |         |     |     |     |     |     |       |
|-----------|---|---------|-----|-----|-----|-----|-----|-------|
| IPRO17981 | 1 | 26 0 0  | 0 0 | 0 0 | 0 0 | 0 0 | 1 1 | 26.57 |
| IPRO18155 | 1 | 60 0 0  | 0 0 | 0 0 | 0 0 | 0 0 | 1 1 | 39.2  |
| IPRO18272 | 1 | 21 1 1  | 0 0 | 0 0 | 0 0 | 0 0 | 0 0 | 33.67 |
| IPRO18276 | 1 | 45 0 0  | 0 0 | 1 1 | 0 0 | 1 0 | 0 0 | 39.27 |
| IPRO18285 | 1 | 6 0 0   | 0 0 | 0 0 | 0 0 | 1 1 | 0 0 | 31.48 |
| IPRO18307 | 1 | 72 0 0  | 0 0 | 0 0 | 1 1 | 0 0 | 0 0 | 30.36 |
| IPRO18309 | 1 | 150 1 1 | 0 0 | 0 0 | 0 0 | 0 0 | 0 0 | 9.19  |
| IPRO18319 | 1 | 317 1 1 | 0 0 | 0 0 | 0 0 | 0 0 | 0 0 | 34.5  |
| IPRO18352 | 1 | 226 0 0 | 0 0 | 0 0 | 0 0 | 1 1 | 0 0 | 30.7  |
| IPRO18383 | 1 | 494 1 1 | 0 0 | 0 0 | 0 0 | 0 0 | 0 0 | 24.05 |
| IPRO18468 | 1 | 25 0 0  | 0 0 | 0 0 | 0 0 | 1 1 | 0 0 | 22.17 |
| IPRO18476 | 1 | 116 1 1 | 0 0 | 0 0 | 0 0 | 0 0 | 0 0 | 16.69 |
| IPRO18478 | 1 | 224 1 1 | 0 0 | 0 0 | 0 0 | 0 0 | 0 0 | 24.78 |
| IPRO18480 | 1 | 496 1 0 | 1 0 | 1 0 | 0 0 | 0 0 | 0 0 | 73.02 |
| IPRO18491 | 1 | 34 0 0  | 0 0 | 0 0 | 0 0 | 1 1 | 0 0 | 70.92 |
| IPRO18514 | 1 | 38 0 0  | 0 0 | 0 0 | 0 0 | 0 0 | 1 1 | 36.41 |
| IPRO18531 | 1 | 152 0 0 | 0 0 | 1 1 | 0 0 | 0 0 | 0 0 | 32.44 |
| IPRO18539 | 1 | 28 0 0  | 0 0 | 0 0 | 0 0 | 0 0 | 1 1 | 38.84 |
| IPRO18545 | 1 | 88 0 0  | 0 0 | 1 1 | 0 0 | 0 0 | 0 0 | 20.22 |
| IPRO18556 | 1 | 57 0 0  | 0 0 | 0 0 | 0 0 | 0 0 | 1 1 | 35.71 |
| IPRO18566 | 1 | 3 1 1   | 0 0 | 0 0 | 0 0 | 0 0 | 0 0 | 42.24 |
| IPRO18598 | 1 | 4 1 1   | 0 0 | 0 0 | 0 0 | 0 0 | 0 0 | 51.97 |
| IPRO18607 | 1 | 65 0 0  | 0 0 | 1 1 | 0 0 | 0 0 | 0 0 | 27.62 |
| IPRO18616 | 1 | 40 0 0  | 0 0 | 0 0 | 0 0 | 0 0 | 0 0 | 44.46 |
| IPRO18617 | 1 | 56 0 0  | 0 0 | 0 0 | 0 0 | 0 0 | 1 1 | 33.21 |
| IPRO18631 | 1 | 131 1 0 | 1 0 | 0 0 | 0 0 | 0 0 | 0 0 | 29.31 |
| IPRO18633 | 1 | 42 1 0  | 0 0 | 1 0 | 0 0 | 0 0 | 0 0 | 11.65 |
| IPRO18638 | 1 | 98 1 1  | 0 0 | 0 0 | 0 0 | 0 0 | 0 0 | 49.45 |
| IPRO18655 | 1 | 83 1 1  | 0 0 | 0 0 | 0 0 | 0 0 | 0 0 | 58.33 |
| IPRO18657 | 1 | 137 1 0 | 1 0 | 0 0 | 0 0 | 0 0 | 0 0 | 21.32 |
| IPRO18659 | 1 | 83 1 0  | 0 0 | 1 0 | 0 0 | 0 0 | 0 0 | 45.77 |
| IPRO18683 | 1 | 136 1 1 | 0 0 | 0 0 | 0 0 | 0 0 | 0 0 | 17.41 |
| IPRO18684 | 1 | 45 1 1  | 0 0 | 0 0 | 0 0 | 0 0 | 0 0 | 43.89 |
| IPRO18698 | 1 | 118 1 1 | 0 0 | 0 0 | 0 0 | 0 0 | 0 0 | 12.23 |
| IPRO18702 | 1 | 171 1 1 | 0 0 | 0 0 | 0 0 | 0 0 | 0 0 | 5.73  |
| IPRO18710 | 1 | 190 1 1 | 0 0 | 0 0 | 0 0 | 0 0 | 0 0 | 7.12  |
| IPRO18713 | 1 | 321 1 1 | 0 0 | 0 0 | 0 0 | 0 0 | 0 0 | 11.26 |
| IPRO18724 | 1 | 81 0 0  | 0 0 | 0 0 | 1 1 | 0 0 | 0 0 | 23.04 |
| IPRO18739 | 1 | 54 1 1  | 0 0 | 0 0 | 0 0 | 0 0 | 0 0 | 18.14 |
| IPRO18740 | 1 | 108 0 0 | 0 0 | 1 1 | 0 0 | 0 0 | 0 0 | 36.24 |
| IPRO18745 | 1 | 107 1 1 | 0 0 | 0 0 | 0 0 | 0 0 | 0 0 | 28.98 |
| IPRO18748 | 1 | 78 1 1  | 0 0 | 0 0 | 0 0 | 0 0 | 0 0 | 32.08 |
| IPRO18755 | 1 | 110 1 1 | 0 0 | 0 0 | 0 0 | 0 0 | 0 0 | 14.62 |
| IPRO18764 | 1 | 222 1 1 | 0 0 | 0 0 | 0 0 | 0 0 | 0 0 | 9.72  |
| IPRO18783 | 1 | 80 0 0  | 1 1 | 0 0 | 0 0 | 0 0 | 0 0 | 34.39 |
| IPRO18790 | 1 | 162 0 0 | 0 0 | 1 1 | 0 0 | 0 0 | 0 0 | 14.8  |
| IPRO18792 | 1 | 31 0 0  | 0 0 | 0 0 | 0 0 | 0 0 | 1 1 | 49.41 |
| IPRO18795 | 1 | 32 0 0  | 0 0 | 0 0 | 0 0 | 0 0 | 1 1 | 41.24 |
| IPRO18805 | 1 | 27 0 0  | 0 0 | 0 0 | 0 0 | 1 1 | 0 0 | 48.93 |
| IPRO18807 | 1 | 26 0 0  | 0 0 | 0 0 | 1 1 | 0 0 | 0 0 | 45.27 |
| IPRO18816 | 1 | 66 0 0  | 0 0 | 1 0 | 1 0 | 1 0 | 1 0 | 38.94 |
| IPRO18827 | 1 | 60 0 0  | 0 0 | 0 0 | 0 0 | 1 1 | 0 0 | 39.31 |
| IPRO18833 | 1 | 133 1 0 | 1 0 | 1 0 | 0 0 | 0 0 | 0 0 | 22.34 |
| IPRO18834 | 1 | 8 0 0   | 0 0 | 0 0 | 0 0 | 1 1 | 0 0 | 32.72 |
| IPRO18835 | 1 | 23 0 0  | 0 0 | 0 0 | 0 0 | 2 2 | 0 0 | 58.04 |
| IPRO18843 | 1 | 7 0 0   | 0 0 | 0 0 | 0 0 | 1 1 | 0 0 | 24.37 |
| IPRO18850 | 1 | 29 0 0  | 0 0 | 0 0 | 0 0 | 1 1 | 0 0 | 48.26 |
| IPRO18861 | 1 | 11 0 0  | 0 0 | 0 0 | 0 0 | 0 0 | 1 1 | 80.27 |
| IPRO18872 | 1 | 66 0 0  | 0 0 | 1 1 | 0 0 | 0 0 | 0 0 | 56.19 |
| IPRO18880 | 1 | 51 1 1  | 0 0 | 0 0 | 0 0 | 0 0 | 0 0 | 21.25 |
| IPRO18907 | 1 | 3 0 0   | 0 0 | 0 0 | 0 0 | 1 1 | 0 0 | 58.83 |
| IPRO18912 | 1 | 67 1 1  | 0 0 | 0 0 | 0 0 | 0 0 | 0 0 | 26.99 |
| IPRO18937 | 1 | 64 0 0  | 0 0 | 0 0 | 0 0 | 0 0 | 1 1 | 28.31 |
| IPRO18939 | 1 | 48 0 0  | 0 0 | 0 0 | 0 0 | 1 1 | 0 0 | 17.44 |
| IPRO18953 | 1 | 170 2 2 | 0 0 | 0 0 | 0 0 | 0 0 | 0 0 | 36.11 |
| IPRO18964 | 1 | 86 1 1  | 0 0 | 0 0 | 0 0 | 0 0 | 0 0 | 34.13 |
| IPRO18978 | 1 | 125 0 0 | 0 0 | 1 0 | 1 0 | 1 0 | 0 0 | 25.8  |
| IPRO18998 | 1 | 63 0 0  | 0 0 | 0 0 | 0 0 | 0 0 | 1 1 | 35.76 |
| IPRO19002 | 1 | 87 0 0  | 0 0 | 0 0 | 0 0 | 1 1 | 2 2 | 20.23 |
| IPRO19005 | 1 | 3 0 0   | 0 0 | 0 0 | 0 0 | 1 1 | 0 0 | 68.76 |
| IPRO19013 | 1 | 85 0 0  | 0 0 | 0 0 | 0 0 | 0 0 | 1 1 | 27.2  |
| IPRO19024 | 1 | 77 0 0  | 0 0 | 1 1 | 0 0 | 0 0 | 0 0 | 17.15 |
| IPRO19025 | 1 | 18 0 0  | 0 0 | 0 0 | 0 0 | 1 1 | 0 0 | 47.95 |
| IPRO19028 | 1 | 27 0 0  | 0 0 | 1 1 | 0 0 | 0 0 | 0 0 | 41.99 |
| IPRO19038 | 1 | 98 0 0  | 0 0 | 0 0 | 0 0 | 0 0 | 0 0 | 20.02 |
| IPRO19052 | 1 | 128 1 1 | 0 0 | 0 0 | 0 0 | 0 0 | 0 0 | 17.23 |
| IPRO19053 | 1 | 95 0 0  | 0 0 | 1 0 | 1 0 | 1 0 | 1 0 | 43.12 |
| IPRO19059 | 1 | 8 1 1   | 0 0 | 0 0 | 0 0 | 0 0 | 0 0 | 43.27 |
| IPRO19062 | 1 | 6 1 1   | 0 0 | 0 0 | 0 0 | 0 0 | 0 0 | 30.47 |
| IPRO19084 | 1 | 61 0 0  | 0 0 | 1 0 | 0 0 | 1 0 | 0 0 | 29.14 |
| IPRO19092 | 1 | 30 1 1  | 0 0 | 0 0 | 0 0 | 0 0 | 0 0 | 16.86 |
| IPRO19093 | 1 | 6 1 1   | 0 0 | 0 0 | 0 0 | 0 0 | 0 0 | 83.39 |
| IPRO19095 | 1 | 49 0 0  | 0 0 | 0 0 | 0 0 | 1 1 | 0 0 | 26.15 |
| IPRO19128 | 1 | 67 0 0  | 0 0 | 1 1 | 0 0 | 0 0 | 0 0 | 19.04 |
| IPRO19131 | 1 | 58 0 0  | 0 0 | 0 0 | 0 0 | 2 3 | 0 0 | 25.59 |
| IPRO19132 | 1 | 91 0 0  | 0 0 | 0 0 | 0 0 | 0 0 | 1 1 | 32.1  |
| IPRO19133 | 1 | 109 1 1 | 0 0 | 0 0 | 0 0 | 0 0 | 0 0 | 18.97 |
| IPRO19140 | 1 | 54 0 0  | 0 0 | 0 0 | 0 0 | 0 0 | 1 1 | 28.38 |
| IPRO19144 | 1 | 35 0 0  | 0 0 | 1 1 | 0 0 | 0 0 | 0 0 | 40.89 |
| IPRO19147 | 1 | 76 0 0  | 0 0 | 1 0 | 0 0 | 0 0 | 1 0 | 28.92 |
| IPRO19148 | 1 | 67 0 0  | 0 0 | 1 1 | 0 0 | 0 0 | 0 0 | 29.11 |
| IPRO19150 | 1 | 73 0 0  | 0 0 | 1 1 | 0 0 | 0 0 | 0 0 | 19.11 |
| IPRO19152 | 1 | 36 0 0  | 0 0 | 0 0 | 0 0 | 1 1 | 0 0 | 51.08 |
| IPRO19162 | 1 | 42 0 0  | 0 0 | 0 0 | 0 0 | 0 0 | 1 1 | 26.52 |
| IPRO19168 | 1 | 35 0 0  | 0 0 | 0 0 | 0 0 | 0 0 | 1 1 | 50.33 |
| IPRO19223 | 1 | 274 1 1 | 0 0 | 0 0 | 0 0 | 0 0 | 0 0 | 22.56 |
| IPRO19224 | 1 | 26 1 0  | 1 0 | 0 0 | 0 0 | 0 0 | 0 0 | 50.05 |
| IPRO19228 | 1 | 87 1 1  | 0 0 | 0 0 | 0 0 | 0 0 | 0 0 | 21.48 |
| IPRO19230 | 1 | 51 1 1  | 0 0 | 0 0 | 0 0 | 0 0 | 0 0 | 45.2  |
| IPRO19233 | 1 | 59 1 1  | 0 0 | 0 0 | 0 0 | 0 0 | 0 0 | 36.18 |
| IPRO19240 | 1 | 69 0 0  | 0 0 | 1 1 | 0 0 | 0 0 | 0 0 | 59.86 |
| IPRO19254 | 1 | 22 0 0  | 0 0 | 1 1 | 0 0 | 0 0 | 0 0 | 34.96 |
| IPRO19262 | 1 | 29 1 1  | 0 0 | 0 0 | 0 0 | 0 0 | 0 0 | 27.06 |
| IPRO19264 | 1 | 652 1 0 | 1 0 | 0 0 | 0 0 | 0 0 | 0 0 | 28.77 |
| IPRO19269 | 1 | 50 0 0  | 0 0 | 1 1 | 0 0 | 0 0 | 0 0 | 27.79 |
| IPRO19271 | 1 | 34 1 1  | 0 0 | 0 0 | 0 0 | 0 0 | 0 0 | 20.16 |
| IPRO19277 | 1 | 87 1 1  | 0 0 | 0 0 | 0 0 | 0 0 | 0 0 | 15.99 |
| IPRO19287 | 1 | 21 1 1  | 0 0 | 0 0 | 0 0 | 0 0 | 0 0 | 43.5  |
| IPRO19295 | 1 | 49 1 1  | 0 0 | 0 0 | 0 0 | 0 0 | 0 0 | 20.11 |
| IPRO19303 | 1 | 127 1 0 | 0 0 | 1 0 | 0 0 | 0 0 | 0 0 | 34.87 |
| IPRO19304 | 1 | 41 1 0  | 1 0 | 1 0 | 0 0 | 0 0 | 0 0 | 38.16 |
| IPRO19325 | 1 | 71 0 0  | 0 0 | 0 0 | 0 0 | 1 1 | 0 0 | 31.99 |
| IPRO19339 | 1 | 113 0 0 | 0 0 | 1 0 | 0 0 | 1 0 | 1 0 | 39.09 |
| IPRO19341 | 1 | 70 0 0  | 0 0 | 1 1 | 0 0 | 0 0 | 0 0 | 15.02 |
| IPRO19348 | 1 | 25 0 0  | 0 0 | 0 0 | 0 0 | 0 0 | 1 1 | 39.52 |
| IPRO19350 | 1 | 29 0 0  | 0 0 | 0 0 | 0 0 | 1 1 | 0 0 | 16    |
| IPRO19361 | 1 | 25 0 0  | 0 0 | 0 0 | 0 0 | 0 0 | 1 1 | 44.57 |
| IPRO19363 | 1 | 91 1 1  | 0 0 | 0 0 | 0 0 | 0 0 | 0 0 | 22.46 |
| IPRO19368 | 1 | 74 0 0  | 0 0 | 0 0 | 0 0 | 0 0 | 1 1 | 20.14 |
| IPRO19382 | 1 | 82 0 0  | 0 0 | 1 1 | 0 0 | 0 0 | 0 0 | 50.52 |
| IPRO19438 | 1 | 66 0 0  | 0 0 | 0 0 | 0 0 | 0 0 | 1 1 | 41.21 |
| IPRO19457 | 1 | 20 1 1  | 0 0 | 0 0 | 0 0 | 0 0 | 0 0 | 57.74 |
| IPRO19460 | 1 | 65 0 0  | 0 0 | 1 0 | 0 0 | 1 0 | 0 0 | 26.97 |
| IPRO19464 | 1 | 48 0 0  | 0 0 | 0 0 | 0 0 | 0 0 | 1 1 | 22.82 |
| IPRO19470 | 1 | 256 1 1 | 0 0 | 0 0 | 0 0 | 0 0 | 0 0 | 33.52 |
| IPRO19473 | 1 | 88 0 0  | 0 0 | 1 0 | 0 0 | 1 0 | 0 0 | 35.89 |
| IPRO19477 | 1 | 30 0 0  | 0 0 | 0 0 | 0 0 | 0 0 | 1 1 | 79.35 |
| IPRO19478 | 1 | 255 1 1 | 0 0 | 0 0 | 0 0 | 0 0 | 0 0 | 21.29 |
| IPRO19487 | 1 | 28 0 0  | 0 0 | 0 0 | 0 0 | 1 1 | 0 0 | 28.89 |
| IPRO19490 | 1 | 58 1 0  | 1 0 | 0 0 | 0 0 | 0 0 | 0 0 | 18.25 |
| IPRO19493 | 1 | 94 2 2  | 0 0 | 0 0 | 0 0 | 0 0 | 0 0 | 24.09 |
| IPRO19498 | 1 | 45 0 0  | 0 0 | 0 0 | 0 0 | 0 0 | 1 1 | 41.28 |
| IPRO19500 | 1 | 102 1 1 | 0 0 | 0 0 | 0 0 | 0 0 | 0 0 | 33.69 |
| IPRO19514 | 1 | 48 0 0  | 0 0 | 1 0 | 1 0 | 0 0 | 1 0 | 35.27 |
| IPRO19518 | 1 | 15 0 0  | 0 0 | 0 0 | 0 0 | 0 0 | 1 1 | 63.04 |
| IPRO19519 | 1 | 47 0 0  | 0 0 | 0 0 | 0 0 | 0 0 | 0 0 | 22.66 |
| IPRO19526 | 1 | 26 0 0  | 0 0 | 0 0 | 0 0 | 1 1 | 0 0 | 57.22 |
| IPRO19530 | 1 | 31 0 0  | 0 0 | 1 1 | 0 0 | 0 0 | 0 0 | 40.83 |
| IPRO19532 | 1 | 25 0 0  | 0 0 | 0 0 | 0 0 | 0 0 | 1 1 | 50.41 |
| IPRO19536 | 1 | 40 0 0  | 0 0 | 0 0 | 0 0 | 0 0 | 1 1 | 40.22 |
| IPRO19541 | 1 | 20 0 0  | 0 0 | 0 0 | 0 0 | 0 0 | 1 1 | 59.51 |
| IPRO19549 | 1 | 54 0 0  | 0 0 | 0 0 | 0 0 | 0 0 | 1 1 | 70.76 |
| IPRO19561 | 1 | 177 0 0 | 0 0 | 1 0 | 1 0 | 1 0 | 0 0 | 52.83 |
| IPRO19566 | 1 | 6 0 0   | 0 0 | 0 0 | 0 0 | 0 0 | 1 1 | 84.16 |
| IPRO19571 | 1 | 7 0 0   | 0 0 | 0 0 | 0 0 | 0 0 | 2 2 | 57.6  |
| IPRO19623 | 1 | 32 0 0  | 0 0 | 0 0 | 0 0 | 1 1 | 0 0 | 45.85 |
| IPRO19629 | 1 | 132 1 1 | 0 0 | 0 0 | 0 0 | 0 0 | 0 0 | 22.89 |

|           |   |          |     |     |     |     |     |       |
|-----------|---|----------|-----|-----|-----|-----|-----|-------|
| IPRO19634 | 1 | 64 1 0   | 0 0 | 1 0 | 0 0 | 0 0 | 0 0 | 44.09 |
| IPRO19637 | 1 | 82 1 1   | 0 0 | 0 0 | 0 0 | 0 0 | 0 0 | 46.16 |
| IPRO19642 | 1 | 48 0 0   | 1 1 | 0 0 | 0 0 | 0 0 | 0 0 | 41.95 |
| IPRO19650 | 1 | 36 1 1   | 0 0 | 0 0 | 0 0 | 0 0 | 0 0 | 20.59 |
| IPRO19674 | 1 | 56 1 1   | 0 0 | 0 0 | 0 0 | 0 0 | 0 0 | 24.32 |
| IPRO19690 | 1 | 73 1 1   | 0 0 | 0 0 | 0 0 | 0 0 | 0 0 | 50    |
| IPRO19707 | 1 | 12 0 0   | 1 1 | 0 0 | 0 0 | 0 0 | 0 0 | 31.32 |
| IPRO19710 | 1 | 24 1 1   | 0 0 | 0 0 | 0 0 | 0 0 | 0 0 | 38.96 |
| IPRO19783 | 1 | 158 0 0  | 1 0 | 1 0 | 1 0 | 1 0 | 1 0 | 33    |
| IPRO19814 | 1 | 767 1 0  | 0 0 | 1 0 | 0 0 | 1 0 | 1 0 | 48.13 |
| IPRO19815 | 1 | 827 1 0  | 0 0 | 1 0 | 0 0 | 1 0 | 1 0 | 38.53 |
| IPRO20040 | 1 | 1908 0 0 | 0 0 | 1 1 | 0 0 | 0 0 | 0 0 | 21.4  |
| IPRO20086 | 1 | 4 1 1    | 0 0 | 0 0 | 0 0 | 0 0 | 0 0 | 39.75 |
| IPRO20098 | 1 | 6 1 1    | 0 0 | 0 0 | 0 0 | 0 0 | 0 0 | 68.19 |
| IPRO20101 | 1 | 16 0 0   | 0 0 | 0 0 | 0 0 | 0 0 | 0 0 | 65.29 |
| IPRO20190 | 1 | 16 0 0   | 0 0 | 0 0 | 0 0 | 0 0 | 1 1 | 54.48 |
| IPRO20217 | 1 | 13 1 1   | 0 0 | 0 0 | 0 0 | 0 0 | 0 0 | 37.79 |
| IPRO20227 | 1 | 4 1 1    | 0 0 | 0 0 | 0 0 | 0 0 | 0 0 | 76.93 |
| IPRO20228 | 1 | 4 1 1    | 0 0 | 0 0 | 0 0 | 0 0 | 0 0 | 81.03 |
| IPRO20235 | 1 | 35 1 1   | 0 0 | 0 0 | 0 0 | 0 0 | 0 0 | 34.4  |
| IPRO20240 | 1 | 39 1 1   | 0 0 | 0 0 | 0 0 | 0 0 | 0 0 | 82.21 |
| IPRO20276 | 1 | 17 1 1   | 0 0 | 0 0 | 0 0 | 0 0 | 0 0 | 87.52 |
| IPRO20279 | 1 | 10 0 0   | 0 0 | 0 0 | 0 0 | 0 0 | 1 1 | 96.05 |
| IPRO20307 | 1 | 9 1 1    | 0 0 | 0 0 | 0 0 | 0 0 | 0 0 | 45.47 |
| IPRO20317 | 1 | 60 1 1   | 0 0 | 0 0 | 0 0 | 0 0 | 0 0 | 71.85 |
| IPRO20322 | 1 | 28 1 0   | 1 0 | 0 0 | 0 0 | 0 0 | 0 0 | 28.8  |
| IPRO20374 | 1 | 3 1 1    | 0 0 | 0 0 | 0 0 | 0 0 | 0 0 | 54.9  |
| IPRO20377 | 1 | 15 1 1   | 0 0 | 0 0 | 0 0 | 0 0 | 0 0 | 59.09 |
| IPRO20384 | 1 | 6 1 1    | 0 0 | 0 0 | 0 0 | 0 0 | 0 0 | 41.15 |
| IPRO20388 | 1 | 6 1 1    | 0 0 | 0 0 | 0 0 | 0 0 | 0 0 | 53.39 |
| IPRO20404 | 1 | 20 1 1   | 0 0 | 0 0 | 0 0 | 0 0 | 0 0 | 80.34 |
| IPRO20484 | 1 | 7 1 1    | 0 0 | 0 0 | 0 0 | 0 0 | 0 0 | 88.1  |
| IPRO20486 | 1 | 21 1 0   | 1 0 | 0 0 | 0 0 | 0 0 | 0 0 | 42.14 |
| IPRO20579 | 1 | 718 1 0  | 1 0 | 0 0 | 0 0 | 0 0 | 0 0 | 29.63 |
| IPRO20783 | 1 | 11 1 1   | 0 0 | 0 0 | 0 0 | 0 0 | 0 0 | 51.44 |
| IPRO20784 | 1 | 12 1 1   | 0 0 | 0 0 | 0 0 | 0 0 | 0 0 | 67.86 |
| IPRO20795 | 1 | 14 0 0   | 0 0 | 0 0 | 0 0 | 1 0 | 1 0 | 24.63 |
| IPRO20899 | 1 | 485 1 1  | 0 0 | 0 0 | 0 0 | 0 0 | 1 1 | 28.52 |
| IPRO20959 | 1 | 25 1 1   | 0 0 | 0 0 | 0 0 | 0 0 | 0 0 | 58.27 |
| IPRO20963 | 1 | 26 1 1   | 0 0 | 0 0 | 0 0 | 0 0 | 0 0 | 52.88 |
| IPRO20980 | 1 | 226 1 1  | 0 0 | 0 0 | 0 0 | 0 0 | 0 0 | 42.7  |
| IPRO20983 | 1 | 35 0 0   | 0 0 | 1 1 | 0 0 | 0 0 | 0 0 | 28.51 |
| IPRO20988 | 1 | 204 1 0  | 1 0 | 1 0 | 0 0 | 0 0 | 0 0 | 15.74 |
| IPRO20989 | 1 | 8 0 0    | 0 0 | 0 0 | 0 0 | 1 1 | 0 0 | 45.87 |
| IPRO20993 | 1 | 8 1 1    | 0 0 | 0 0 | 0 0 | 0 0 | 0 0 | 27.41 |
| IPRO21000 | 1 | 27 0 0   | 0 0 | 0 0 | 0 0 | 1 1 | 0 0 | 49.6  |
| IPRO21005 | 1 | 12 1 1   | 0 0 | 0 0 | 0 0 | 0 0 | 0 0 | 34.65 |
| IPRO21026 | 1 | 37 1 1   | 0 0 | 0 0 | 0 0 | 0 0 | 0 0 | 53.59 |
| IPRO21028 | 1 | 10 1 1   | 0 0 | 0 0 | 0 0 | 0 0 | 0 0 | 40.38 |
| IPRO21030 | 1 | 51 1 1   | 0 0 | 0 0 | 0 0 | 0 0 | 0 0 | 46.42 |
| IPRO21043 | 1 | 7 0 0    | 0 0 | 0 0 | 0 0 | 0 0 | 1 1 | 72.4  |
| IPRO21050 | 1 | 62 1 1   | 0 0 | 0 0 | 0 0 | 0 0 | 0 0 | 39.32 |
| IPRO21059 | 1 | 43 1 1   | 0 0 | 0 0 | 0 0 | 0 0 | 0 0 | 35.55 |
| IPRO21065 | 1 | 19 1 1   | 0 0 | 0 0 | 0 0 | 0 0 | 0 0 | 80.97 |
| IPRO21069 | 1 | 58 1 1   | 0 0 | 0 0 | 0 0 | 0 0 | 0 0 | 35.54 |
| IPRO21072 | 1 | 79 0 0   | 0 0 | 0 0 | 0 0 | 0 0 | 1 1 | 23.76 |
| IPRO21083 | 1 | 4 0 0    | 0 0 | 0 0 | 0 0 | 2 2 | 0 0 | 52.81 |
| IPRO21087 | 1 | 38 1 1   | 0 0 | 0 0 | 0 0 | 0 0 | 0 0 | 22.66 |
| IPRO21112 | 1 | 13 1 1   | 0 0 | 0 0 | 0 0 | 0 0 | 0 0 | 48.62 |
| IPRO21113 | 1 | 19 0 0   | 0 0 | 1 1 | 0 0 | 0 0 | 0 0 | 63.23 |
| IPRO21120 | 1 | 292 1 1  | 0 0 | 0 0 | 0 0 | 0 0 | 0 0 | 23.13 |
| IPRO21135 | 1 | 509 0 0  | 0 0 | 1 1 | 0 0 | 0 0 | 0 0 | 31.6  |
| IPRO21151 | 1 | 101 0 0  | 0 0 | 0 0 | 0 0 | 1 1 | 0 0 | 21.84 |
| IPRO21164 | 1 | 25 0 0   | 0 0 | 0 0 | 0 0 | 0 0 | 1 1 | 48.4  |
| IPRO21225 | 1 | 92 1 1   | 0 0 | 0 0 | 0 0 | 0 0 | 0 0 | 39.54 |
| IPRO21242 | 1 | 82 1 1   | 0 0 | 0 0 | 0 0 | 0 0 | 0 0 | 30.85 |
| IPRO21245 | 1 | 90 1 1   | 0 0 | 0 0 | 0 0 | 0 0 | 0 0 | 32.22 |
| IPRO21247 | 1 | 83 1 1   | 0 0 | 0 0 | 0 0 | 0 0 | 0 0 | 25.17 |
| IPRO21255 | 1 | 141 1 1  | 0 0 | 0 0 | 0 0 | 0 0 | 0 0 | 13.62 |
| IPRO21278 | 1 | 28 0 0   | 0 0 | 0 0 | 0 0 | 1 1 | 0 0 | 38.78 |
| IPRO21280 | 1 | 67 1 1   | 0 0 | 0 0 | 0 0 | 0 0 | 0 0 | 23.56 |
| IPRO21285 | 1 | 44 1 1   | 0 0 | 0 0 | 0 0 | 0 0 | 0 0 | 83.32 |
| IPRO21301 | 1 | 41 1 1   | 0 0 | 0 0 | 0 0 | 0 0 | 0 0 | 24.35 |
| IPRO21303 | 1 | 51 1 1   | 0 0 | 0 0 | 0 0 | 0 0 | 0 0 | 67.41 |
| IPRO21319 | 1 | 67 0 0   | 0 0 | 1 1 | 0 0 | 0 0 | 0 0 | 22.37 |
| IPRO21346 | 1 | 53 0 0   | 0 0 | 0 0 | 0 0 | 0 0 | 0 0 | 28.21 |
| IPRO21360 | 1 | 155 1 1  | 0 0 | 0 0 | 0 0 | 0 0 | 0 0 | 25.34 |
| IPRO21392 | 1 | 7 0 0    | 0 0 | 0 0 | 0 0 | 0 0 | 1 1 | 39.81 |
| IPRO21425 | 1 | 27 1 1   | 0 0 | 0 0 | 0 0 | 0 0 | 0 0 | 56.98 |
| IPRO21463 | 1 | 28 0 0   | 0 0 | 0 0 | 0 0 | 1 1 | 0 0 | 40.17 |
| IPRO21485 | 1 | 21 1 1   | 0 0 | 0 0 | 0 0 | 0 0 | 0 0 | 67.78 |
| IPRO21499 | 1 | 54 1 1   | 0 0 | 0 0 | 0 0 | 0 0 | 0 0 | 16.12 |
| IPRO21527 | 1 | 129 0 0  | 1 1 | 0 0 | 0 0 | 0 0 | 0 0 | 31.8  |
| IPRO21533 | 1 | 159 1 1  | 0 0 | 0 0 | 0 0 | 0 0 | 0 0 | 15.21 |
| IPRO21542 | 1 | 10 1 1   | 0 0 | 0 0 | 0 0 | 0 0 | 0 0 | 33.36 |
| IPRO21563 | 1 | 19 0 0   | 0 0 | 0 0 | 0 0 | 0 0 | 1 1 | 35.24 |
| IPRO21566 | 1 | 14 0 0   | 0 0 | 0 0 | 0 0 | 0 0 | 1 1 | 67.33 |
| IPRO21567 | 1 | 39 0 0   | 0 0 | 0 0 | 0 0 | 0 0 | 1 1 | 34.88 |
| IPRO21569 | 1 | 50 0 0   | 0 0 | 0 0 | 0 0 | 1 0 | 1 0 | 38.07 |
| IPRO21570 | 1 | 33 1 1   | 0 0 | 0 0 | 0 0 | 0 0 | 0 0 | 52.5  |
| IPRO21581 | 1 | 8 0 0    | 0 0 | 0 0 | 0 0 | 0 0 | 0 0 | 8.3   |
| IPRO21613 | 1 | 26 0 0   | 0 0 | 0 0 | 0 0 | 0 0 | 1 1 | 51.75 |
| IPRO21630 | 1 | 4 1 1    | 0 0 | 0 0 | 0 0 | 0 0 | 0 0 | 33.77 |
| IPRO21631 | 1 | 13 1 1   | 0 0 | 0 0 | 0 0 | 0 0 | 0 0 | 58.5  |
| IPRO21641 | 1 | 30 0 0   | 0 0 | 0 0 | 0 0 | 1 1 | 0 0 | 30.63 |
| IPRO21643 | 1 | 50 0 0   | 0 0 | 0 0 | 0 0 | 1 0 | 0 0 | 23.38 |
| IPRO21644 | 1 | 4 0 0    | 0 0 | 0 0 | 0 0 | 0 0 | 1 1 | 63.93 |
| IPRO21656 | 1 | 14 0 0   | 0 0 | 0 0 | 0 0 | 0 0 | 1 1 | 30.96 |
| IPRO21657 | 1 | 13 1 1   | 0 0 | 0 0 | 0 0 | 0 0 | 0 0 | 98.75 |
| IPRO21660 | 1 | 55 1 1   | 0 0 | 0 0 | 0 0 | 0 0 | 0 0 | 34.63 |
| IPRO21662 | 1 | 32 0 0   | 0 0 | 0 0 | 0 0 | 0 0 | 1 1 | 86.7  |
| IPRO21663 | 1 | 23 0 0   | 0 0 | 0 0 | 0 0 | 0 0 | 1 1 | 68.27 |
| IPRO21665 | 1 | 56 0 0   | 0 0 | 0 0 | 0 0 | 0 0 | 1 1 | 20.68 |
| IPRO21666 | 1 | 14 0 0   | 0 0 | 0 0 | 0 0 | 0 0 | 1 1 | 78.19 |
| IPRO21672 | 1 | 3 1 1    | 0 0 | 0 0 | 0 0 | 0 0 | 0 0 | 67.65 |
| IPRO21676 | 1 | 49 0 0   | 0 0 | 1 1 | 0 0 | 0 0 | 0 0 | 41.96 |
| IPRO21706 | 1 | 8 0 0    | 0 0 | 0 0 | 0 0 | 1 1 | 0 0 | 43    |
| IPRO21711 | 1 | 8 0 0    | 0 0 | 0 0 | 0 0 | 1 1 | 0 0 | 32.76 |
| IPRO21722 | 1 | 21 1 1   | 0 0 | 0 0 | 0 0 | 0 0 | 0 0 | 67.04 |
| IPRO21723 | 1 | 127 1 1  | 0 0 | 0 0 | 0 0 | 0 0 | 0 0 | 19.44 |
| IPRO21757 | 1 | 65 0 0   | 0 0 | 0 0 | 1 1 | 1 0 | 1 0 | 20.6  |
| IPRO21760 | 1 | 19 1 1   | 0 0 | 0 0 | 0 0 | 0 0 | 0 0 | 14.1  |
| IPRO21761 | 1 | 6 0 0    | 0 0 | 0 0 | 0 0 | 0 0 | 1 1 | 89.16 |
| IPRO21763 | 1 | 56 0 0   | 0 0 | 0 0 | 0 0 | 0 0 | 0 0 | 45.8  |
| IPRO21765 | 1 | 232 0 0  | 0 0 | 0 0 | 0 0 | 1 1 | 0 0 | 15.76 |
| IPRO21767 | 1 | 23 1 1   | 0 0 | 0 0 | 0 0 | 0 0 | 0 0 | 54.34 |
| IPRO21770 | 1 | 32 1 1   | 0 0 | 0 0 | 0 0 | 0 0 | 0 0 | 43.91 |
| IPRO21782 | 1 | 46 1 1   | 0 0 | 0 0 | 0 0 | 0 0 | 0 0 | 20.89 |
| IPRO21792 | 1 | 18 0 0   | 0 0 | 1 1 | 0 0 | 0 0 | 0 0 | 28.53 |
| IPRO21797 | 1 | 78 1 0   | 0 0 | 1 0 | 0 0 | 0 0 | 0 0 | 12.91 |
| IPRO21798 | 1 | 38 1 1   | 0 0 | 0 0 | 0 0 | 0 0 | 0 0 | 40.47 |
| IPRO21802 | 1 | 43 0 0   | 0 0 | 0 0 | 0 0 | 0 0 | 1 1 | 39.08 |
| IPRO21814 | 1 | 48 1 1   | 0 0 | 0 0 | 0 0 | 0 0 | 0 0 | 28.19 |
| IPRO21826 | 1 | 137 1 1  | 0 0 | 0 0 | 0 0 | 0 0 | 0 0 | 62.72 |
| IPRO21830 | 1 | 99 0 0   | 1 1 | 0 0 | 0 0 | 0 0 | 0 0 | 30.68 |
| IPRO21836 | 1 | 96 1 1   | 0 0 | 0 0 | 0 0 | 0 0 | 0 0 | 18.85 |
| IPRO21847 | 1 | 50 1 1   | 0 0 | 0 0 | 0 0 | 0 0 | 0 0 | 45.27 |
| IPRO21851 | 1 | 85 0 0   | 0 0 | 0 0 | 0 0 | 1 1 | 0 0 | 25.97 |
| IPRO21855 | 1 | 58 0 0   | 0 0 | 1 1 | 0 0 | 0 0 | 0 0 | 27.64 |
| IPRO21856 | 1 | 35 1 1   | 0 0 | 0 0 | 0 0 | 0 0 | 0 0 | 52.02 |
| IPRO21863 | 1 | 71 1 0   | 0 0 | 0 0 | 0 0 | 1 0 | 0 0 | 36.75 |
| IPRO21865 | 1 | 21 1 1   | 0 0 | 0 0 | 0 0 | 0 0 | 0 0 | 52.14 |
| IPRO21866 | 1 | 141 1 1  | 0 0 | 0 0 | 0 0 | 0 0 | 0 0 | 17.69 |
| IPRO21871 | 1 | 45 2 2   | 0 0 | 0 0 | 0 0 | 0 0 | 0 0 | 33.22 |
| IPRO21873 | 1 | 42 1 1   | 0 0 | 0 0 | 0 0 | 0 0 | 0 0 | 30.46 |
| IPRO21875 | 1 | 3 0 0    | 0 0 | 0 0 | 0 0 | 1 1 | 0 0 | 58.86 |
| IPRO21882 | 1 | 14 1 1   | 0 0 | 0 0 | 0 0 | 0 0 | 0 0 | 23.67 |
| IPRO21891 | 1 | 52 0 0   | 0 0 | 1 0 | 1 0 | 1 0 | 1 0 | 25.67 |
| IPRO21895 | 1 | 19 0 0   | 0 0 | 0 0 | 0 0 | 1 1 | 0 0 | 43.1  |
| IPRO21905 | 1 | 18 0 0   | 0 0 | 0 0 | 0 0 | 1 1 | 0 0 | 45.69 |
| IPRO21906 | 1 | 37 0 0   | 0 0 | 0 0 | 0 0 | 0 0 | 1 1 | 56.9  |
| IPRO21910 | 1 | 45 0 0   | 0 0 | 1 1 | 0 0 | 0 0 | 0 0 | 29.31 |
| IPRO21914 | 1 | 24 0 0   | 0 0 | 0 0 | 0 0 | 0 0 | 0 0 | 60.61 |
| IPRO21916 | 1 | 58 0 0   | 0 0 | 1 1 | 0 0 | 0 0 | 0 0 | 26.72 |
| IPRO21918 | 1 | 31 0 0   | 0 0 | 0 0 | 0 0 | 0 0 | 1 1 | 50.88 |
| IPRO21923 | 1 | 56 1 0   | 1 0 | 0 0 | 0 0 | 0 0 | 0 0 | 28.69 |
| IPRO21924 | 1 | 62 0 0   | 0 0 | 1 1 | 0 0 | 0 0 | 0 0 | 36.8  |

|           |   |         |     |     |     |     |     |       |
|-----------|---|---------|-----|-----|-----|-----|-----|-------|
| IPRO21925 | 1 | 32 0 0  | 0 0 | 0 0 | 0 0 | 0 0 | 1 1 | 51.4  |
| IPRO21930 | 1 | 45 0 0  | 0 0 | 0 0 | 0 0 | 0 0 | 1 1 | 60.77 |
| IPRO21939 | 1 | 35 0 0  | 0 0 | 0 0 | 0 0 | 0 0 | 2 2 | 54.69 |
| IPRO21954 | 1 | 42 0 0  | 0 0 | 1 1 | 0 0 | 0 0 | 0 0 | 35.38 |
| IPRO21958 | 1 | 30 1 1  | 0 0 | 0 0 | 0 0 | 0 0 | 0 0 | 25.67 |
| IPRO21967 | 1 | 61 0 0  | 0 0 | 1 0 | 0 0 | 2 1 | 1 0 | 24.24 |
| IPRO21969 | 1 | 77 1 1  | 0 0 | 0 0 | 0 0 | 0 0 | 0 0 | 44.13 |
| IPRO21979 | 1 | 36 1 1  | 0 0 | 0 0 | 0 0 | 0 0 | 0 0 | 31.44 |
| IPRO21986 | 1 | 42 1 0  | 0 0 | 0 0 | 0 0 | 1 0 | 0 0 | 24.88 |
| IPRO21992 | 1 | 29 1 1  | 0 0 | 0 0 | 0 0 | 0 0 | 0 0 | 31.71 |
| IPRO21999 | 1 | 77 0 0  | 0 0 | 1 1 | 0 0 | 0 0 | 0 0 | 26.16 |
| IPRO22000 | 1 | 92 1 1  | 0 0 | 0 0 | 0 0 | 0 0 | 0 0 | 23.62 |
| IPRO22006 | 1 | 5 0 0   | 0 0 | 0 0 | 0 0 | 0 0 | 1 1 | 33.99 |
| IPRO22016 | 1 | 60 0 0  | 0 0 | 0 0 | 0 0 | 1 1 | 0 0 | 47.84 |
| IPRO22023 | 1 | 74 0 0  | 0 0 | 1 0 | 1 0 | 1 0 | 1 0 | 35.59 |
| IPRO22026 | 1 | 53 1 0  | 1 0 | 0 0 | 0 0 | 0 0 | 0 0 | 32.97 |
| IPRO22031 | 1 | 49 0 0  | 0 0 | 0 0 | 0 0 | 1 0 | 1 0 | 22.13 |
| IPRO22035 | 1 | 29 0 0  | 0 0 | 0 0 | 0 0 | 0 0 | 1 1 | 50.11 |
| IPRO22036 | 1 | 56 0 0  | 0 0 | 0 0 | 0 0 | 1 1 | 0 0 | 40.53 |
| IPRO22043 | 1 | 70 0 0  | 0 0 | 0 0 | 0 0 | 0 0 | 1 1 | 43.49 |
| IPRO22046 | 1 | 62 0 0  | 0 0 | 0 0 | 0 0 | 1 0 | 1 0 | 43.82 |
| IPRO22047 | 1 | 9 0 0   | 0 0 | 0 0 | 0 0 | 0 0 | 1 1 | 40    |
| IPRO22051 | 1 | 60 1 1  | 0 0 | 0 0 | 0 0 | 0 0 | 0 0 | 28.87 |
| IPRO22058 | 1 | 40 0 0  | 0 0 | 0 0 | 0 0 | 0 0 | 1 1 | 66.01 |
| IPRO22067 | 1 | 34 0 0  | 0 0 | 0 0 | 0 0 | 0 0 | 1 1 | 46.15 |
| IPRO22070 | 1 | 14 0 0  | 0 0 | 0 0 | 0 0 | 0 0 | 1 1 | 53.81 |
| IPRO22079 | 1 | 11 0 0  | 0 0 | 0 0 | 0 0 | 0 0 | 0 0 | 68.87 |
| IPRO22082 | 1 | 42 0 0  | 0 0 | 0 0 | 0 0 | 0 0 | 1 1 | 74.68 |
| IPRO22084 | 1 | 22 0 0  | 0 0 | 0 0 | 0 0 | 0 0 | 2 2 | 44.15 |
| IPRO22091 | 1 | 58 0 0  | 0 0 | 1 0 | 0 0 | 1 0 | 1 0 | 33.44 |
| IPRO22095 | 1 | 9 1 1   | 0 0 | 0 0 | 0 0 | 0 0 | 0 0 | 63.02 |
| IPRO22097 | 1 | 66 0 0  | 0 0 | 0 0 | 0 0 | 1 1 | 0 0 | 46.59 |
| IPRO22111 | 1 | 70 1 1  | 0 0 | 0 0 | 0 0 | 0 0 | 0 0 | 53.02 |
| IPRO22114 | 1 | 34 0 0  | 0 0 | 0 0 | 0 0 | 0 0 | 1 1 | 33.69 |
| IPRO22128 | 1 | 84 1 1  | 0 0 | 0 0 | 0 0 | 0 0 | 0 0 | 27.81 |
| IPRO22130 | 1 | 28 0 0  | 0 0 | 0 0 | 0 0 | 0 0 | 1 1 | 71.47 |
| IPRO22132 | 1 | 21 0 0  | 0 0 | 0 0 | 0 0 | 0 0 | 1 1 | 90.75 |
| IPRO22133 | 1 | 65 1 1  | 0 0 | 0 0 | 0 0 | 1 0 | 1 0 | 53.32 |
| IPRO22135 | 1 | 36 0 0  | 0 0 | 0 0 | 0 0 | 0 0 | 1 1 | 48.52 |
| IPRO22136 | 1 | 35 0 0  | 0 0 | 0 0 | 0 0 | 0 0 | 1 1 | 29.8  |
| IPRO22147 | 1 | 101 1 0 | 0 0 | 1 0 | 0 0 | 0 0 | 0 0 | 59.54 |
| IPRO22151 | 1 | 60 0 0  | 0 0 | 0 0 | 0 0 | 0 0 | 1 1 | 46.62 |
| IPRO22154 | 1 | 37 0 0  | 0 0 | 0 0 | 0 0 | 0 0 | 1 1 | 30.84 |
| IPRO22157 | 1 | 72 0 0  | 0 0 | 0 0 | 0 0 | 1 0 | 1 0 | 28.56 |
| IPRO22158 | 1 | 65 0 0  | 0 0 | 0 0 | 0 0 | 1 0 | 1 0 | 25.34 |
| IPRO22166 | 1 | 38 0 0  | 0 0 | 0 0 | 0 0 | 0 0 | 1 1 | 77.02 |
| IPRO22182 | 1 | 64 1 1  | 0 0 | 0 0 | 0 0 | 0 0 | 0 0 | 23.36 |
| IPRO22189 | 1 | 63 0 0  | 0 0 | 0 0 | 0 0 | 0 0 | 1 1 | 41.97 |
| IPRO22191 | 1 | 56 1 1  | 0 0 | 0 0 | 0 0 | 0 0 | 0 0 | 37.52 |
| IPRO22196 | 1 | 41 1 1  | 0 0 | 0 0 | 0 0 | 0 0 | 0 0 | 58.77 |
| IPRO22198 | 1 | 94 0 0  | 0 0 | 0 0 | 0 0 | 1 1 | 0 0 | 18.38 |
| IPRO22203 | 1 | 46 1 1  | 0 0 | 0 0 | 0 0 | 0 0 | 0 0 | 34.61 |
| IPRO22204 | 1 | 52 1 1  | 0 0 | 0 0 | 0 0 | 0 0 | 0 0 | 54.35 |
| IPRO22206 | 1 | 28 1 1  | 0 0 | 0 0 | 0 0 | 0 0 | 0 0 | 31.51 |
| IPRO22208 | 1 | 24 1 1  | 0 0 | 0 0 | 0 0 | 0 0 | 0 0 | 32.29 |
| IPRO22221 | 1 | 22 1 1  | 0 0 | 0 0 | 0 0 | 0 0 | 0 0 | 41.82 |
| IPRO22222 | 1 | 40 1 1  | 0 0 | 0 0 | 0 0 | 0 0 | 0 0 | 39.42 |
| IPRO22223 | 1 | 46 1 1  | 0 0 | 0 0 | 0 0 | 0 0 | 0 0 | 81.71 |
| IPRO22237 | 1 | 51 1 0  | 0 0 | 0 0 | 0 0 | 1 0 | 0 0 | 33.17 |
| IPRO22238 | 1 | 76 0 0  | 0 0 | 1 0 | 1 0 | 1 0 | 1 0 | 34.73 |
| IPRO22241 | 1 | 15 0 0  | 0 0 | 0 0 | 0 0 | 0 0 | 1 1 | 69.03 |
| IPRO22244 | 1 | 48 1 1  | 0 0 | 0 0 | 0 0 | 0 0 | 0 0 | 21.18 |
| IPRO22248 | 1 | 26 0 0  | 0 0 | 0 0 | 0 0 | 0 0 | 1 1 | 28.22 |
| IPRO22249 | 1 | 68 1 1  | 0 0 | 0 0 | 0 0 | 0 0 | 0 0 | 22.16 |
| IPRO22346 | 1 | 382 1 1 | 0 0 | 0 0 | 0 0 | 0 0 | 0 0 | 7.19  |
| IPRO22416 | 1 | 15 0 0  | 0 0 | 0 0 | 0 0 | 0 0 | 1 1 | 85.05 |
| MF_00811  | 1 | 272 0 0 | 0 0 | 0 0 | 0 0 | 1 1 | 0 0 | 94.62 |
| MF_01148  | 1 | 22 1 1  | 0 0 | 0 0 | 0 0 | 0 0 | 0 0 | 26.55 |
| PD009120  | 1 | 13 0 0  | 0 0 | 0 0 | 0 0 | 0 0 | 1 1 | 77.94 |
| PD015242  | 1 | 6 0 0   | 0 0 | 0 0 | 0 0 | 0 0 | 1 1 | 94.35 |
| PD019840  | 1 | 4 0 0   | 0 0 | 0 0 | 0 0 | 0 0 | 1 1 | 70.74 |
| PD027180  | 1 | 13 0 0  | 0 0 | 0 0 | 0 0 | 0 0 | 1 1 | 62.31 |
| PD027657  | 1 | 18 1 1  | 0 0 | 0 0 | 0 0 | 0 0 | 0 0 | 68.05 |
| PD036408  | 1 | 8 1 1   | 0 0 | 0 0 | 0 0 | 0 0 | 0 0 | 57.98 |
| PD043187  | 1 | 14 1 1  | 0 0 | 0 0 | 0 0 | 0 0 | 0 0 | 29.78 |
| PD049684  | 1 | 7 1 1   | 0 0 | 0 0 | 0 0 | 0 0 | 0 0 | 58.18 |
| PD049902  | 1 | 27 1 1  | 0 0 | 0 0 | 0 0 | 0 0 | 0 0 | 37.86 |
| PD052090  | 1 | 36 1 1  | 0 0 | 0 0 | 0 0 | 0 0 | 0 0 | 80.84 |
| PD052969  | 1 | 103 1 1 | 0 0 | 0 0 | 0 0 | 0 0 | 0 0 | 64.93 |
| PD056452  | 1 | 178 1 1 | 0 0 | 0 0 | 0 0 | 0 0 | 0 0 | 61.47 |
| PD102758  | 1 | 13 1 1  | 0 0 | 0 0 | 0 0 | 0 0 | 0 0 | 50.45 |
| PD102989  | 1 | 14 1 1  | 0 0 | 0 0 | 0 0 | 0 0 | 0 0 | 28.3  |
| PD117379  | 1 | 57 1 1  | 0 0 | 0 0 | 0 0 | 0 0 | 0 0 | 67.36 |
| PD119161  | 1 | 15 1 1  | 0 0 | 0 0 | 0 0 | 0 0 | 0 0 | 47.04 |
| PD170898  | 1 | 39 1 1  | 0 0 | 0 0 | 0 0 | 0 0 | 0 0 | 30.61 |
| PD209215  | 1 | 11 1 1  | 0 0 | 0 0 | 0 0 | 0 0 | 0 0 | 51.97 |
| PD319978  | 1 | 7 0 0   | 0 0 | 0 0 | 0 0 | 0 0 | 1 1 | 60.48 |
| PD334079  | 1 | 6 0 0   | 0 0 | 0 0 | 0 0 | 0 0 | 1 1 | 66.71 |
| PD487572  | 1 | 12 1 1  | 0 0 | 0 0 | 0 0 | 0 0 | 0 0 | 40.57 |
| PD488660  | 1 | 21 1 1  | 0 0 | 0 0 | 0 0 | 0 0 | 0 0 | 64.86 |
| PD505916  | 1 | 7 1 1   | 0 0 | 0 0 | 0 0 | 0 0 | 0 0 | 62.03 |
| PD531162  | 1 | 7 1 1   | 0 0 | 0 0 | 0 0 | 0 0 | 0 0 | 57.8  |
| PD740661  | 1 | 11 1 1  | 0 0 | 0 0 | 0 0 | 0 0 | 0 0 | 36.37 |
| PF00281   | 1 | 948 1 0 | 1 0 | 1 0 | 1 0 | 1 0 | 1 0 | 49    |
| PF00673   | 1 | 972 1 0 | 1 0 | 1 0 | 1 0 | 1 0 | 1 0 | 49.42 |
| PF01847   | 1 | 31 0 0  | 0 0 | 0 0 | 0 0 | 1 1 | 0 0 | 29.92 |
| PF02523   | 1 | 28 1 1  | 0 0 | 0 0 | 0 0 | 0 0 | 0 0 | 38.85 |
| PF02757   | 1 | 644 0 0 | 0 0 | 0 0 | 0 0 | 0 0 | 1 1 | 77.23 |
| PF03316   | 1 | 8 1 1   | 0 0 | 0 0 | 0 0 | 0 0 | 0 0 | 45.44 |
| PF03318   | 1 | 29 0 0  | 0 0 | 0 0 | 0 0 | 1 1 | 0 0 | 9.19  |
| PF03670   | 1 | 36 0 0  | 0 0 | 0 0 | 0 0 | 0 0 | 1 1 | 32.42 |
| PF03869   | 1 | 110 1 1 | 0 0 | 0 0 | 0 0 | 0 0 | 0 0 | 28.46 |
| PF03915   | 1 | 46 2 2  | 0 0 | 0 0 | 0 0 | 0 0 | 0 0 | 27.23 |
| PF04171   | 1 | 243 1 0 | 1 0 | 0 0 | 0 0 | 0 0 | 0 0 | 23.92 |
| PF04188   | 1 | 110 0 0 | 0 0 | 0 0 | 0 0 | 0 0 | 0 0 | 16.76 |
| PF04215   | 1 | 258 1 1 | 0 0 | 0 0 | 0 0 | 0 0 | 0 0 | 38.48 |
| PF04250   | 1 | 100 1 1 | 0 0 | 0 0 | 0 0 | 0 0 | 0 0 | 12.97 |
| PF04347   | 1 | 350 1 1 | 0 0 | 0 0 | 0 0 | 0 0 | 0 0 | 14.81 |
| PF04388   | 1 | 39 0 0  | 0 0 | 0 0 | 0 0 | 2 2 | 0 0 | 27.99 |
| PF04426   | 1 | 24 0 0  | 0 0 | 0 0 | 0 0 | 1 1 | 0 0 | 18.35 |
| PF04630   | 1 | 34 1 1  | 0 0 | 0 0 | 0 0 | 0 0 | 0 0 | 17.79 |
| PF04712   | 1 | 68 0 0  | 0 0 | 0 0 | 0 0 | 0 0 | 0 0 | 21.5  |
| PF04734   | 1 | 150 0 0 | 0 0 | 0 0 | 0 0 | 0 0 | 1 1 | 25.74 |
| PF04938   | 1 | 48 0 0  | 0 0 | 1 1 | 0 0 | 0 0 | 0 0 | 18.81 |
| PF04955   | 1 | 193 1 1 | 0 0 | 0 0 | 0 0 | 0 0 | 0 0 | 22.74 |
| PF04984   | 1 | 330 0 0 | 0 0 | 1 1 | 0 0 | 0 0 | 0 0 | 11.26 |
| PF05040   | 1 | 118 0 0 | 0 0 | 0 0 | 0 0 | 0 0 | 1 1 | 34.73 |
| PF05090   | 1 | 31 0 0  | 0 0 | 0 0 | 0 0 | 0 0 | 1 1 | 8.79  |
| PF05249   | 1 | 252 1 1 | 0 0 | 0 0 | 0 0 | 0 0 | 0 0 | 23.78 |
| PF05387   | 1 | 37 0 0  | 1 1 | 0 0 | 0 0 | 0 0 | 0 0 | 25.61 |
| PF05458   | 1 | 25 0 0  | 0 0 | 0 0 | 0 0 | 0 0 | 1 1 | 39.04 |
| PF05481   | 1 | 45 1 1  | 0 0 | 0 0 | 0 0 | 0 0 | 0 0 | 31.13 |
| PF05534   | 1 | 191 1 1 | 0 0 | 0 0 | 0 0 | 0 0 | 0 0 | 24.55 |
| PF05536   | 1 | 46 0 0  | 0 0 | 1 1 | 0 0 | 0 0 | 0 0 | 21.1  |
| PF05545   | 1 | 180 1 1 | 0 0 | 0 0 | 0 0 | 0 0 | 0 0 | 23.69 |
| PF05646   | 1 | 37 0 0  | 0 0 | 0 0 | 0 0 | 1 1 | 0 0 | 45.74 |
| PF05706   | 1 | 28 1 1  | 0 0 | 0 0 | 0 0 | 0 0 | 0 0 | 42.55 |
| PF05792   | 1 | 108 0 0 | 0 0 | 0 0 | 0 0 | 4 4 | 1 1 | 33.68 |
| PF05817   | 1 | 77 0 0  | 0 0 | 0 0 | 0 0 | 0 0 | 1 1 | 24.73 |
| PF05822   | 1 | 60 0 0  | 0 0 | 0 0 | 0 0 | 0 0 | 1 1 | 36.45 |
| PF05978   | 1 | 132 0 0 | 0 0 | 0 0 | 0 0 | 0 0 | 1 1 | 24.08 |
| PF06179   | 1 | 73 0 0  | 0 0 | 0 0 | 0 0 | 1 1 | 0 0 | 29.12 |
| PF06296   | 1 | 157 1 1 | 0 0 | 0 0 | 0 0 | 0 0 | 0 0 | 21.81 |
| PF06509   | 1 | 216 1 1 | 0 0 | 0 0 | 0 0 | 0 0 | 0 0 | 56.03 |
| PF06559   | 1 | 99 1 0  | 1 0 | 0 0 | 0 0 | 0 0 | 0 0 | 42.09 |
| PF06664   | 1 | 97 0 0  | 0 0 | 0 0 | 0 0 | 0 0 | 1 1 | 18.29 |
| PF06710   | 1 | 40 1 1  | 0 0 | 0 0 | 0 0 | 0 0 | 1 1 | 41.99 |
| PF06765   | 1 | 50 0 0  | 0 0 | 0 0 | 0 0 | 0 0 | 1 1 | 54.40 |
| PF06774   | 1 | 26 1 0  | 1 0 | 0 0 | 0 0 | 0 0 | 0 0 | 39.51 |
| PF06941   | 1 | 113 1 1 | 0 0 | 0 0 | 0 0 | 0 0 | 0 0 | 15.64 |
| PF07031   | 1 | 91 0 0  | 0 0 | 0 0 | 0 0 | 0 0 | 0 0 | 37.38 |
| PF07034   | 1 | 69 0 0  | 0 0 | 0 0 | 0 0 | 1 0 | 1 0 | 23.32 |
| PF07049   | 1 | 8 1 1   | 0 0 | 0 0 | 0 0 | 0 0 | 0 0 | 15.5  |
| PF07084   | 1 | 52 0 0  | 0 0 | 0 0 | 0 0 | 0 0 | 1 1 | 25.3  |
| PF07164   | 1 | 38 1 1  | 0 0 | 0 0 | 0 0 | 0 0 | 0 0 | 37.57 |
| PF07168   | 1 | 40 0 0  | 0 0 | 1 1 | 0 0 | 0 0 | 0 0 | 49.02 |
| PF07332   | 1 | 338 1 1 | 0 0 | 0 0 | 0 0 | 0 0 | 0 0 | 11.11 |

|                |   |         |     |     |     |     |     |       |
|----------------|---|---------|-----|-----|-----|-----|-----|-------|
| PF07355        | 1 | 62 1 1  | 0 0 | 0 0 | 0 0 | 0 0 | 0 0 | 32.86 |
| PF07386        | 1 | 187 1 1 | 0 0 | 0 0 | 0 0 | 0 0 | 0 0 | 19    |
| PF07427        | 1 | 6 0 0   | 1 1 | 0 0 | 0 0 | 0 0 | 0 0 | 17.91 |
| PF07570        | 1 | 4 1 1   | 0 0 | 0 0 | 0 0 | 0 0 | 0 0 | 54.55 |
| PF08009        | 1 | 54 1 1  | 0 0 | 0 0 | 0 0 | 0 0 | 0 0 | 34.34 |
| PF08234        | 1 | 67 0 0  | 0 0 | 1 1 | 0 0 | 1 1 | 0 0 | 21.18 |
| PF08319        | 1 | 30 0 0  | 0 0 | 0 0 | 0 0 | 1 1 | 0 0 | 28.33 |
| PF08342        | 1 | 20 1 1  | 0 0 | 0 0 | 0 0 | 0 0 | 0 0 | 45.43 |
| PF08786        | 1 | 134 1 1 | 0 0 | 0 0 | 0 0 | 0 0 | 0 0 | 14.97 |
| PF08911        | 1 | 61 0 0  | 0 0 | 1 0 | 0 0 | 1 0 | 2 1 | 19.5  |
| PF09024        | 1 | 9 0 0   | 0 0 | 0 0 | 0 0 | 0 0 | 1 1 | 41.97 |
| PF09029        | 1 | 29 0 0  | 0 0 | 0 0 | 0 0 | 0 0 | 1 1 | 43.27 |
| PF09037        | 1 | 33 0 0  | 0 0 | 1 1 | 0 0 | 0 0 | 0 0 | 25.68 |
| PF09288        | 1 | 29 0 0  | 0 0 | 0 0 | 0 0 | 1 1 | 0 0 | 51.47 |
| PF09389        | 1 | 15 0 0  | 0 0 | 0 0 | 0 0 | 0 0 | 1 1 | 66.09 |
| PF09410        | 1 | 132 0 0 | 0 0 | 0 0 | 1 1 | 0 0 | 0 0 | 32.99 |
| PF09540        | 1 | 131 1 1 | 0 0 | 0 0 | 0 0 | 0 0 | 0 0 | 22.71 |
| PF09670        | 1 | 43 2 2  | 0 0 | 0 0 | 0 0 | 0 0 | 0 0 | 8.86  |
| PF09760        | 1 | 58 0 0  | 0 0 | 0 0 | 0 0 | 1 1 | 0 0 | 41.24 |
| PF09787        | 1 | 62 0 0  | 0 0 | 0 0 | 0 0 | 0 0 | 1 1 | 17.29 |
| PF09812        | 1 | 53 0 0  | 0 0 | 0 0 | 0 0 | 1 1 | 0 0 | 26.08 |
| PF09908        | 1 | 59 1 1  | 0 0 | 0 0 | 0 0 | 0 0 | 0 0 | 38.51 |
| PF09934        | 1 | 96 1 1  | 0 0 | 0 0 | 0 0 | 0 0 | 0 0 | 33.97 |
| PF09975        | 1 | 34 1 1  | 0 0 | 0 0 | 0 0 | 0 0 | 0 0 | 28.26 |
| PF09983        | 1 | 99 1 1  | 0 0 | 0 0 | 0 0 | 0 0 | 0 0 | 11.83 |
| PF10019        | 1 | 129 1 0 | 0 0 | 1 0 | 0 0 | 0 0 | 0 0 | 26.15 |
| PF10024        | 1 | 62 1 1  | 0 0 | 0 0 | 0 0 | 0 0 | 0 0 | 26.38 |
| PF10064        | 1 | 53 1 1  | 0 0 | 0 0 | 0 0 | 0 0 | 0 0 | 23.04 |
| PF10132        | 1 | 48 1 1  | 0 0 | 0 0 | 0 0 | 0 0 | 0 0 | 46.06 |
| PF10156        | 1 | 67 0 0  | 0 0 | 0 0 | 0 0 | 1 1 | 0 0 | 17.63 |
| PF10219        | 1 | 45 0 0  | 0 0 | 0 0 | 0 0 | 0 0 | 0 0 | 50.51 |
| PF10259        | 1 | 53 0 0  | 0 0 | 0 0 | 0 0 | 1 1 | 0 0 | 23.29 |
| PF10485        | 1 | 18 0 0  | 0 0 | 0 0 | 0 0 | 0 0 | 1 1 | 58.02 |
| PF10858        | 1 | 13 1 1  | 0 0 | 0 0 | 0 0 | 0 0 | 0 0 | 52.45 |
| PF10961        | 1 | 42 0 0  | 0 0 | 0 0 | 0 0 | 0 0 | 1 1 | 39.25 |
| PF11009        | 1 | 62 1 1  | 0 0 | 0 0 | 0 0 | 0 0 | 0 0 | 43.1  |
| PF11018        | 1 | 81 0 0  | 0 0 | 0 0 | 0 0 | 0 0 | 1 1 | 36.75 |
| PF11047        | 1 | 25 1 1  | 0 0 | 0 0 | 0 0 | 0 0 | 0 0 | 49.13 |
| PF11107        | 1 | 17 0 0  | 0 0 | 1 1 | 0 0 | 0 0 | 0 0 | 20.99 |
| PF11119        | 1 | 37 1 1  | 0 0 | 0 0 | 0 0 | 0 0 | 0 0 | 60.65 |
| PF11181        | 1 | 70 1 1  | 0 0 | 0 0 | 0 0 | 0 0 | 0 0 | 28.27 |
| PF11251        | 1 | 33 1 1  | 0 0 | 0 0 | 0 0 | 0 0 | 0 0 | 41.49 |
| PF11261        | 1 | 55 0 0  | 0 0 | 0 0 | 0 0 | 0 0 | 1 1 | 36.74 |
| PF11356        | 1 | 46 1 1  | 0 0 | 0 0 | 0 0 | 0 0 | 0 0 | 15.72 |
| PF11423        | 1 | 5 1 1   | 0 0 | 0 0 | 0 0 | 0 0 | 0 0 | 59.61 |
| PF11530        | 1 | 4 1 1   | 0 0 | 0 0 | 0 0 | 0 0 | 0 0 | 87.71 |
| PF11532        | 1 | 11 0 0  | 0 0 | 0 0 | 0 0 | 0 0 | 2 2 | 89.39 |
| PF11533        | 1 | 59 1 1  | 0 0 | 0 0 | 0 0 | 0 0 | 0 0 | 42.74 |
| PF11540        | 1 | 47 0 0  | 0 0 | 0 0 | 0 0 | 0 0 | 1 1 | 57.79 |
| PF11575        | 1 | 64 1 1  | 0 0 | 0 0 | 0 0 | 0 0 | 0 0 | 42.56 |
| PF11578        | 1 | 115 1 1 | 0 0 | 0 0 | 0 0 | 0 0 | 0 0 | 19.66 |
| PF11587        | 1 | 52 0 0  | 0 0 | 0 0 | 0 0 | 0 0 | 1 1 | 81.93 |
| PF11612        | 1 | 169 1 1 | 0 0 | 0 0 | 0 0 | 0 0 | 0 0 | 12.23 |
| PF11619        | 1 | 11 0 0  | 0 0 | 0 0 | 0 0 | 0 0 | 1 1 | 68.01 |
| PF11651        | 1 | 35 1 1  | 0 0 | 0 0 | 0 0 | 0 0 | 0 0 | 10.79 |
| PF11699        | 1 | 43 1 1  | 0 0 | 0 0 | 0 0 | 0 0 | 0 0 | 28.42 |
| PF11709        | 1 | 32 0 0  | 0 0 | 0 0 | 0 0 | 1 1 | 0 0 | 26.34 |
| PF11710        | 1 | 60 0 0  | 0 0 | 0 0 | 0 0 | 1 1 | 0 0 | 24.79 |
| PF11751        | 1 | 109 1 1 | 0 0 | 0 0 | 0 0 | 0 0 | 0 0 | 13.89 |
| PF11762        | 1 | 7 1 1   | 0 0 | 0 0 | 0 0 | 0 0 | 0 0 | 55.87 |
| PF11776        | 1 | 170 1 1 | 0 0 | 0 0 | 0 0 | 0 0 | 0 0 | 31.54 |
| PF11794        | 1 | 171 1 0 | 1 0 | 0 0 | 0 0 | 0 0 | 0 0 | 33.04 |
| PF11795        | 1 | 8 1 1   | 0 0 | 0 0 | 0 0 | 0 0 | 0 0 | 32.35 |
| PF11812        | 1 | 88 1 1  | 0 0 | 0 0 | 0 0 | 0 0 | 0 0 | 22.46 |
| PF11838        | 1 | 124 1 1 | 0 0 | 0 0 | 0 0 | 0 0 | 0 0 | 24.29 |
| PF11841        | 1 | 46 0 0  | 0 0 | 0 0 | 0 0 | 2 1 | 1 0 | 41.71 |
| PF11844        | 1 | 65 1 1  | 0 0 | 0 0 | 0 0 | 0 0 | 0 0 | 45.63 |
| PF11858        | 1 | 87 1 1  | 0 0 | 0 0 | 0 0 | 0 0 | 0 0 | 25.55 |
| PF11868        | 1 | 51 1 1  | 0 0 | 0 0 | 0 0 | 0 0 | 0 0 | 70.36 |
| PF11873        | 1 | 94 1 1  | 0 0 | 0 0 | 0 0 | 0 0 | 0 0 | 55.39 |
| PF11886        | 1 | 46 0 0  | 0 0 | 1 1 | 0 0 | 0 0 | 0 0 | 45.61 |
| PF11887        | 1 | 308 1 1 | 0 0 | 0 0 | 0 0 | 0 0 | 0 0 | 9.07  |
| PF11890        | 1 | 131 1 1 | 0 0 | 0 0 | 0 0 | 0 0 | 0 0 | 95.54 |
| PF11893        | 1 | 141 1 1 | 0 0 | 0 0 | 0 0 | 0 0 | 0 0 | 37.15 |
| PF11895        | 1 | 3 0 0   | 0 0 | 0 0 | 0 0 | 1 1 | 0 0 | 24.85 |
| PF11918        | 1 | 7 0 0   | 0 0 | 0 0 | 0 0 | 0 0 | 1 1 | 59.1  |
| PF11939        | 1 | 76 1 1  | 0 0 | 0 0 | 0 0 | 0 0 | 0 0 | 41.38 |
| PF11946        | 1 | 95 1 1  | 0 0 | 0 0 | 0 0 | 0 0 | 0 0 | 60.83 |
| PF11949        | 1 | 38 1 1  | 0 0 | 0 0 | 0 0 | 0 0 | 0 0 | 28.92 |
| PF11959        | 1 | 58 1 0  | 1 0 | 0 0 | 0 0 | 0 0 | 0 0 | 26.35 |
| PF11967        | 1 | 235 1 1 | 0 0 | 0 0 | 0 0 | 0 0 | 0 0 | 13.79 |
| PF11970        | 1 | 46 0 0  | 0 0 | 0 0 | 0 0 | 1 1 | 0 0 | 32.33 |
| PF11975        | 1 | 15 1 1  | 0 0 | 0 0 | 0 0 | 0 0 | 0 0 | 26.59 |
| PF11997        | 1 | 62 1 0  | 0 0 | 0 0 | 0 0 | 1 0 | 0 0 | 27.76 |
| PF12000        | 1 | 66 1 1  | 0 0 | 0 0 | 0 0 | 0 0 | 0 0 | 28.02 |
| PF12038        | 1 | 45 1 0  | 0 0 | 0 0 | 0 0 | 0 0 | 1 0 | 39.85 |
| PF12052        | 1 | 113 0 0 | 0 0 | 0 0 | 0 0 | 0 0 | 2 2 | 77.88 |
| PF12079        | 1 | 98 1 1  | 0 0 | 0 0 | 0 0 | 0 0 | 0 0 | 12.79 |
| PF12080        | 1 | 16 1 1  | 0 0 | 0 0 | 0 0 | 0 0 | 0 0 | 18.36 |
| PF12081        | 1 | 15 1 1  | 0 0 | 0 0 | 0 0 | 0 0 | 0 0 | 18.68 |
| PF12105        | 1 | 111 1 1 | 0 0 | 0 0 | 0 0 | 0 0 | 0 0 | 46.41 |
| PF12109        | 1 | 11 0 0  | 0 0 | 0 0 | 0 0 | 0 0 | 1 1 | 83.91 |
| PF12122        | 1 | 98 1 1  | 0 0 | 0 0 | 0 0 | 0 0 | 0 0 | 41.58 |
| PF12139        | 1 | 28 1 1  | 0 0 | 0 0 | 0 0 | 0 0 | 0 0 | 44.68 |
| PF12153        | 1 | 10 0 0  | 0 0 | 0 0 | 0 0 | 0 0 | 1 1 | 46.41 |
| PF12209        | 1 | 5 0 0   | 0 0 | 0 0 | 0 0 | 1 1 | 0 0 | 31.17 |
| PF12242        | 1 | 5 2 2   | 0 0 | 0 0 | 0 0 | 0 0 | 0 0 | 33.17 |
| PF12243        | 1 | 27 0 0  | 0 0 | 0 0 | 0 0 | 1 1 | 0 0 | 53.03 |
| PF12320        | 1 | 347 1 0 | 1 0 | 0 0 | 0 0 | 0 0 | 0 0 | 13.06 |
| PF12338        | 1 | 27 0 0  | 0 0 | 1 1 | 0 0 | 0 0 | 0 0 | 66.45 |
| PF12345        | 1 | 77 1 0  | 0 0 | 1 0 | 0 0 | 0 0 | 0 0 | 44.5  |
| PF12353        | 1 | 107 0 0 | 0 0 | 1 0 | 0 0 | 2 1 | 0 0 | 37.84 |
| PF12367        | 1 | 137 1 0 | 1 0 | 0 0 | 0 0 | 0 0 | 0 0 | 33.84 |
| PF12390        | 1 | 184 1 1 | 0 0 | 0 0 | 0 0 | 0 0 | 0 0 | 22.71 |
| PF12391        | 1 | 117 1 1 | 0 0 | 0 0 | 0 0 | 0 0 | 0 0 | 33.44 |
| PF12404        | 1 | 104 1 1 | 0 0 | 0 0 | 0 0 | 0 0 | 0 0 | 53.48 |
| PF12411        | 1 | 75 1 0  | 0 0 | 0 0 | 0 0 | 1 0 | 0 0 | 52.4  |
| PF12414        | 1 | 26 0 0  | 0 0 | 0 0 | 0 0 | 1 1 | 0 0 | 40.49 |
| PF12422        | 1 | 28 0 0  | 0 0 | 1 1 | 0 0 | 0 0 | 1 1 | 23.26 |
| PF12452        | 1 | 52 1 1  | 0 0 | 0 0 | 0 0 | 0 0 | 0 0 | 27.22 |
| PF12465        | 1 | 93 0 0  | 0 0 | 0 0 | 1 0 | 1 0 | 1 0 | 32.7  |
| PF12466        | 1 | 10 1 1  | 0 0 | 0 0 | 0 0 | 0 0 | 0 0 | 50.4  |
| PF12469        | 1 | 62 1 1  | 0 0 | 0 0 | 0 0 | 0 0 | 0 0 | 17.03 |
| PF12476        | 1 | 53 1 1  | 0 0 | 0 0 | 0 0 | 0 0 | 0 0 | 22.44 |
| PF12481        | 1 | 46 0 0  | 0 0 | 1 1 | 0 0 | 0 0 | 0 0 | 48.7  |
| PF12504        | 1 | 43 0 0  | 0 0 | 1 1 | 0 0 | 0 0 | 0 0 | 63.18 |
| PF12530        | 1 | 52 0 0  | 0 0 | 0 0 | 0 0 | 0 0 | 2 2 | 17.57 |
| PF12535        | 1 | 87 1 1  | 0 0 | 0 0 | 0 0 | 0 0 | 0 0 | 34.73 |
| PF12537        | 1 | 51 0 0  | 0 0 | 1 0 | 0 0 | 1 0 | 1 0 | 46.89 |
| PF12548        | 1 | 32 0 0  | 0 0 | 0 0 | 0 0 | 0 0 | 1 1 | 37.62 |
| PF12568        | 1 | 59 1 1  | 0 0 | 0 0 | 0 0 | 0 0 | 0 0 | 59.37 |
| PF12573        | 1 | 52 1 1  | 0 0 | 0 0 | 0 0 | 0 0 | 0 0 | 59.78 |
| PF12578        | 1 | 29 0 0  | 0 0 | 0 0 | 0 0 | 0 0 | 1 1 | 27.6  |
| PF12598        | 1 | 18 0 0  | 0 0 | 0 0 | 0 0 | 0 0 | 1 1 | 33.95 |
| PTHR10032-SF24 | 1 | 6 0 0   | 0 0 | 0 0 | 0 0 | 0 0 | 1 1 | 81.92 |
| PTHR10032-SF63 | 1 | 24 0 0  | 0 0 | 0 0 | 0 0 | 0 0 | 1 1 | 29.18 |
| PTHR10032-SF76 | 1 | 9 0 0   | 0 0 | 1 1 | 0 0 | 0 0 | 0 0 | 36.41 |
| PTHR10044-SF7  | 1 | 26 0 0  | 0 0 | 0 0 | 0 0 | 0 0 | 1 1 | 21.86 |
| PTHR10044-SF8  | 1 | 20 0 0  | 0 0 | 1 1 | 0 0 | 0 0 | 0 0 | 50.38 |
| PTHR10050-SF1  | 1 | 11 1 1  | 0 0 | 0 0 | 0 0 | 0 0 | 0 0 | 30.38 |
| PTHR10050-SF5  | 1 | 13 1 1  | 0 0 | 0 0 | 0 0 | 0 0 | 0 0 | 24.02 |
| PTHR10052-SF2  | 1 | 33 0 0  | 0 0 | 1 1 | 0 0 | 0 0 | 0 0 | 54.1  |
| PTHR10074-SF23 | 1 | 46 0 0  | 0 0 | 0 0 | 0 0 | 1 1 | 0 0 | 8.69  |
| PTHR10108      | 1 | 40 1 1  | 0 0 | 0 0 | 0 0 | 0 0 | 0 0 | 15.78 |
| PTHR10151      | 1 | 8 1 1   | 0 0 | 0 0 | 0 0 | 0 0 | 0 0 | 24.83 |
| PTHR10168-SF16 | 1 | 11 0 0  | 0 0 | 1 0 | 0 0 | 0 0 | 1 0 | 41.99 |
| PTHR10178-SF10 | 1 | 134 0 0 | 0 0 | 1 1 | 0 0 | 0 0 | 0 0 | 11.02 |
| PTHR10183-SF18 | 1 | 8 0 0   | 0 0 | 0 0 | 0 0 | 1 0 | 1 0 | 32.28 |
| PTHR10183-SF38 | 1 | 10 0 0  | 0 0 | 0 0 | 0 0 | 0 0 | 1 1 | 78.81 |
| PTHR10183-SF55 | 1 | 6 0 0   | 0 0 | 1 1 | 0 0 | 0 0 | 0 0 | 27.02 |
| PTHR10223      | 1 | 13 0 0  | 0 0 | 0 0 | 0 0 | 0 0 | 1 1 | 29.71 |
| PTHR10241-SF11 | 1 | 5 0 0   | 0 0 | 1 1 | 0 0 | 0 0 | 0 0 | 57.79 |
| PTHR10270-SF35 | 1 | 19 0 0  | 0 0 | 1 1 | 0 0 | 0 0 | 0 0 | 21.85 |
| PTHR10315-SF7  | 1 | 8 0 0   | 0 0 | 0 0 | 0 0 | 0 0 | 1 1 | 69.07 |
| PTHR10342-SF7  | 1 | 6 1 0   | 0 0 | 0 0 | 0 0 | 1 0 | 0 0 | 47.33 |
| PTHR10351-SF21 | 1 | 31 0 0  | 0 0 | 0 0 | 0 0 | 1 1 | 0 0 | 25.65 |
| PTHR10357-SF11 | 1 | 18 1 1  | 0 0 | 0 0 | 0 0 | 0 0 | 0 0 | 18.59 |

|                 |   |         |     |     |     |       |     |       |
|-----------------|---|---------|-----|-----|-----|-------|-----|-------|
| PTHR10367       | 1 | 8 0 0   | 0 0 | 0 0 | 0 0 | 1 1   | 0 0 | 12.93 |
| PTHR10432-SF62  | 1 | 11 0 0  | 0 0 | 0 0 | 0 0 | 0 0   | 0 0 | 10.61 |
| PTHR10436       | 1 | 4 0 0   | 0 0 | 0 0 | 1 1 | 0 0   | 0 0 | 15.94 |
| PTHR10483-SF4   | 1 | 68 0 0  | 0 0 | 1 1 | 0 0 | 0 0   | 0 0 | 9.96  |
| PTHR10488       | 1 | 19 1 1  | 0 0 | 0 0 | 0 0 | 0 0   | 0 0 | 52.17 |
| PTHR10499-SF122 | 1 | 4 1 1   | 0 0 | 0 0 | 0 0 | 0 0   | 0 0 | 82.09 |
| PTHR10519       | 1 | 3 1 1   | 0 0 | 0 0 | 0 0 | 0 0   | 0 0 | 64.66 |
| PTHR10527-SF1   | 1 | 10 0 0  | 0 0 | 1 1 | 0 0 | 0 0   | 0 0 | 16.85 |
| PTHR10534       | 1 | 15 1 1  | 0 0 | 0 0 | 0 0 | 0 0   | 0 0 | 19.79 |
| PTHR10548       | 1 | 11 0 0  | 0 0 | 0 0 | 0 0 | 0 0   | 1 1 | 28.01 |
| PTHR10552       | 1 | 114 0 0 | 0 0 | 0 0 | 0 0 | 0 0   | 1 1 | 28.31 |
| PTHR10578       | 1 | 37 0 0  | 1 1 | 0 0 | 0 0 | 0 0   | 0 0 | 8.04  |
| PTHR10617-SF1   | 1 | 5 1 1   | 0 0 | 0 0 | 0 0 | 0 0   | 0 0 | 40.6  |
| PTHR10663-SF5   | 1 | 28 0 0  | 0 0 | 0 0 | 0 0 | 1 1   | 0 0 | 33.81 |
| PTHR10668-SF5   | 1 | 21 1 1  | 0 0 | 0 0 | 0 0 | 0 0   | 0 0 | 19.88 |
| PTHR10670       | 1 | 6 0 0   | 0 0 | 0 0 | 0 0 | 0 0   | 1 1 | 49.03 |
| PTHR10684       | 1 | 3 0 0   | 0 0 | 0 0 | 0 0 | 0 0   | 1 1 | 93.49 |
| PTHR10684-SF3   | 1 | 9 0 0   | 0 0 | 0 0 | 0 0 | 0 0   | 1 1 | 68.14 |
| PTHR10730-SF1   | 1 | 9 1 1   | 0 0 | 0 0 | 0 0 | 0 0   | 0 0 | 40.46 |
| PTHR10763       | 1 | 5 0 0   | 0 0 | 0 0 | 0 0 | 1 1   | 0 0 | 22.48 |
| PTHR10795-SF17  | 1 | 53 0 0  | 0 0 | 1 1 | 0 0 | 0 0   | 0 0 | 7.33  |
| PTHR10795-SF32  | 1 | 8 1 1   | 0 0 | 0 0 | 0 0 | 0 0   | 0 0 | 31.71 |
| PTHR10803       | 1 | 7 1 1   | 0 0 | 0 0 | 0 0 | 0 0   | 0 0 | 72.42 |
| PTHR10845       | 1 | 5 0 0   | 0 0 | 0 0 | 0 0 | 0 0   | 1 1 | 97.42 |
| PTHR10887-SF17  | 1 | 68 0 0  | 0 0 | 0 0 | 0 0 | 1 1   | 0 0 | 30.61 |
| PTHR10887-SF20  | 1 | 5 0 0   | 0 0 | 0 0 | 0 0 | 0 0   | 1 1 | 58.35 |
| PTHR10887-SF23  | 1 | 24 0 0  | 0 0 | 0 0 | 1 1 | 0 0   | 0 0 | 23.43 |
| PTHR10887-SF7   | 1 | 71 1 1  | 0 0 | 0 0 | 0 0 | 0 0   | 0 0 | 10.1  |
| PTHR10891-SF40  | 1 | 11 1 1  | 0 0 | 0 0 | 0 0 | 0 0   | 0 0 | 25.5  |
| PTHR10891-SF5   | 1 | 18 1 0  | 0 0 | 0 0 | 1 0 | 0 0   | 1 0 | 37.49 |
| PTHR10891-SF8   | 1 | 7 0 0   | 0 0 | 1 1 | 0 0 | 0 0   | 0 0 | 47.29 |
| PTHR10910       | 1 | 35 0 0  | 0 0 | 0 0 | 0 0 | 0 0   | 0 0 | 75.81 |
| PTHR10943       | 1 | 5 0 0   | 0 0 | 0 0 | 0 0 | 0 0   | 1 1 | 19.39 |
| PTHR10992-SF22  | 1 | 19 0 0  | 0 0 | 0 0 | 0 0 | 0 0   | 1 1 | 11.94 |
| PTHR10997       | 1 | 9 0 0   | 0 0 | 1 1 | 0 0 | 0 0   | 0 0 | 16.31 |
| PTHR10997-SF18  | 1 | 35 0 0  | 0 0 | 1 1 | 0 0 | 0 0   | 0 0 | 20.22 |
| PTHR10997-SF9   | 1 | 8 0 0   | 0 0 | 1 1 | 0 0 | 0 0   | 0 0 | 25.77 |
| PTHR11066       | 1 | 12 0 0  | 0 0 | 0 0 | 0 0 | 0 0   | 0 0 | 17.7  |
| PTHR11012       | 1 | 7 0 0   | 0 0 | 0 0 | 0 0 | 0 0   | 1 1 | 23.69 |
| PTHR11019-SF12  | 1 | 11 1 1  | 0 0 | 0 0 | 0 0 | 0 0   | 0 0 | 56.84 |
| PTHR11061-SF2   | 1 | 7 1 1   | 0 0 | 0 0 | 0 0 | 0 0   | 0 0 | 13.24 |
| PTHR11076-SF12  | 1 | 4 1 1   | 0 0 | 0 0 | 0 0 | 0 0   | 0 0 | 80.43 |
| PTHR11076-SF2   | 1 | 14 0 0  | 0 0 | 0 0 | 0 0 | 0 0   | 1 1 | 60.48 |
| PTHR11124       | 1 | 38 1 1  | 0 0 | 0 0 | 0 0 | 0 0   | 0 0 | 39.54 |
| PTHR11129-SF1   | 1 | 6 0 0   | 0 0 | 1 0 | 0 0 | 0 0   | 1 0 | 19.51 |
| PTHR11132       | 1 | 49 0 0  | 0 0 | 1 1 | 0 0 | 0 0   | 0 0 | 15.18 |
| PTHR11133       | 1 | 8 1 0   | 1 0 | 0 0 | 0 0 | 0 0   | 0 0 | 64.09 |
| PTHR11133-SF2   | 1 | 4 1 1   | 0 0 | 0 0 | 0 0 | 0 0   | 0 0 | 75.91 |
| PTHR11161       | 1 | 54 0 0  | 0 0 | 0 0 | 0 0 | 0 0   | 1 1 | 10.84 |
| PTHR11206-SF7   | 1 | 4 1 0   | 0 0 | 1 0 | 0 0 | 0 0   | 0 0 | 13.53 |
| PTHR11223       | 1 | 5 0 0   | 0 0 | 1 1 | 0 0 | 0 0   | 0 0 | 29.65 |
| PTHR11224       | 1 | 5 0 0   | 0 0 | 0 0 | 0 0 | 1 1   | 0 0 | 42.24 |
| PTHR11260       | 1 | 160 1 1 | 0 0 | 0 0 | 0 0 | 0 0   | 0 0 | 6.4   |
| PTHR11276       | 1 | 8 0 0   | 0 0 | 1 1 | 0 0 | 0 0   | 0 0 | 17.32 |
| PTHR11351       | 1 | 13 1 1  | 0 0 | 0 0 | 0 0 | 0 0   | 0 0 | 15.17 |
| PTHR11405       | 1 | 5 1 1   | 0 0 | 0 0 | 0 0 | 0 0   | 0 0 | 45.25 |
| PTHR11474       | 1 | 46 1 0  | 0 0 | 0 0 | 0 0 | 1 0   | 0 0 | 45.28 |
| PTHR11474-SF1   | 1 | 29 1 0  | 0 0 | 0 0 | 0 0 | 1 0   | 0 0 | 45.88 |
| PTHR11481       | 1 | 12 0 0  | 0 0 | 0 0 | 0 0 | 0 0   | 1 1 | 56.9  |
| PTHR11546       | 1 | 9 0 0   | 0 0 | 1 0 | 0 0 | 0 0   | 1 0 | 16.99 |
| PTHR11558-SF11  | 1 | 4 1 1   | 0 0 | 0 0 | 0 0 | 0 0   | 0 0 | 56.93 |
| PTHR11614-SF9   | 1 | 11 1 1  | 0 0 | 0 0 | 0 0 | 0 0   | 0 0 | 12.59 |
| PTHR11624       | 1 | 4 1 0   | 1 0 | 0 0 | 0 0 | 0 0   | 0 0 | 29.01 |
| PTHR11624-SF20  | 1 | 6 1 1   | 0 0 | 0 0 | 0 0 | 0 0   | 0 0 | 17.99 |
| PTHR11632-SF3   | 1 | 19 1 0  | 0 0 | 0 0 | 0 0 | 0 0   | 0 0 | 58.46 |
| PTHR11695-SF34  | 1 | 36 0 0  | 0 0 | 0 0 | 0 0 | 1 1   | 0 0 | 19.05 |
| PTHR11697-SF17  | 1 | 5 0 0   | 0 0 | 0 0 | 0 0 | 1 1   | 0 0 | 41.04 |
| PTHR11697-SF9   | 1 | 32 0 0  | 0 0 | 1 1 | 0 0 | 0 0   | 0 0 | 18.97 |
| PTHR11702       | 1 | 3 0 0   | 0 0 | 0 0 | 0 0 | 0 0   | 1 1 | 23.02 |
| PTHR11709-SF2   | 1 | 6 1 0   | 1 0 | 0 0 | 0 0 | 0 0   | 0 0 | 54.36 |
| PTHR11751-SF10  | 1 | 8 1 1   | 0 0 | 0 0 | 0 0 | 0 0   | 0 0 | 15.21 |
| PTHR11799       | 1 | 24 1 0  | 0 0 | 0 0 | 0 0 | 1 0   | 0 0 | 13.69 |
| PTHR11827       | 1 | 3 0 0   | 0 0 | 0 0 | 0 0 | 1 0   | 0 0 | 43.76 |
| PTHR11889-SF3   | 1 | 6 1 1   | 0 0 | 0 0 | 0 0 | 0 0   | 0 0 | 40.24 |
| PTHR11909       | 1 | 17 0 0  | 0 0 | 0 0 | 0 0 | 0 0   | 1 1 | 11.24 |
| PTHR11915-SF38  | 1 | 7 0 0   | 0 0 | 0 0 | 0 0 | 1 1   | 0 0 | 61.58 |
| PTHR11938-SF7   | 1 | 20 1 1  | 0 0 | 0 0 | 0 0 | 0 0   | 0 0 | 28.73 |
| PTHR11939-SF18  | 1 | 13 0 0  | 0 0 | 1 1 | 0 0 | 0 0   | 0 0 | 21.37 |
| PTHR11968       | 1 | 16 0 0  | 0 0 | 0 0 | 0 0 | 0 0   | 0 0 | 10.11 |
| PTHR12081-SF1   | 1 | 3 0 0   | 0 0 | 0 0 | 0 0 | 0 0   | 1 1 | 86.48 |
| PTHR12085       | 1 | 37 0 0  | 0 0 | 0 0 | 0 0 | 0 0   | 1 1 | 37.71 |
| PTHR12087       | 1 | 12 0 0  | 0 0 | 0 0 | 0 0 | 1 1   | 0 0 | 17.35 |
| PTHR12110       | 1 | 10 1 1  | 0 0 | 0 0 | 0 0 | 0 0   | 0 0 | 38.2  |
| PTHR12126-SF1   | 1 | 11 1 1  | 0 0 | 0 0 | 0 0 | 0 0   | 0 0 | 22.17 |
| PTHR12147       | 1 | 10 0 0  | 0 0 | 0 0 | 0 0 | 0 0   | 1 1 | 21.06 |
| PTHR12176       | 1 | 97 0 0  | 0 0 | 1 1 | 0 0 | 0 0   | 0 0 | 17.96 |
| PTHR12197-SF3   | 1 | 53 0 0  | 0 0 | 0 0 | 0 0 | 0 0   | 1 1 | 33.03 |
| PTHR12203-SF12  | 1 | 7 0 0   | 0 0 | 0 0 | 0 0 | 0 0   | 0 0 | 64.98 |
| PTHR12205       | 1 | 18 0 0  | 0 0 | 0 0 | 0 0 | 1 1   | 0 0 | 50.93 |
| PTHR12223-SF7   | 1 | 4 0 0   | 0 0 | 0 0 | 0 0 | 0 0   | 1 1 | 56.26 |
| PTHR12266       | 1 | 22 0 0  | 0 0 | 0 0 | 0 0 | 1 0   | 0 0 | 25.45 |
| PTHR12270-SF1   | 1 | 48 0 0  | 0 0 | 0 0 | 0 0 | 0 0   | 0 0 | 48    |
| PTHR12272       | 1 | 18 0 0  | 0 0 | 0 0 | 0 0 | 1 1   | 0 0 | 35.07 |
| PTHR12272-SF7   | 1 | 11 0 0  | 0 0 | 0 0 | 0 0 | 0 0   | 1 1 | 67.8  |
| PTHR12277-SF9   | 1 | 74 1 1  | 0 0 | 0 0 | 0 0 | 0 0   | 0 0 | 15.18 |
| PTHR12289       | 1 | 15 0 0  | 0 0 | 0 0 | 0 0 | 1 1   | 0 0 | 17.94 |
| PTHR12294-SF1   | 1 | 32 0 0  | 0 0 | 0 0 | 0 0 | 0 0   | 1 1 | 45.83 |
| PTHR12294-SF3   | 1 | 6 0 0   | 0 0 | 0 0 | 0 0 | 0 0   | 1 1 | 70.07 |
| PTHR12306       | 1 | 9 0 0   | 0 0 | 0 0 | 0 0 | 0 0   | 1 1 | 98.01 |
| PTHR12306-SF1   | 1 | 6 0 0   | 0 0 | 0 0 | 0 0 | 0 0   | 1 1 | 94.22 |
| PTHR12320       | 1 | 22 0 0  | 0 0 | 0 0 | 1 1 | 0 0   | 0 0 | 22.25 |
| PTHR12331       | 1 | 26 0 0  | 0 0 | 0 0 | 0 0 | 0 0   | 1 1 | 59.87 |
| PTHR12336       | 1 | 83 0 0  | 0 0 | 0 0 | 0 0 | 0 0   | 0 0 | 42.79 |
| PTHR12341       | 1 | 18 0 0  | 0 0 | 0 0 | 0 0 | 0 0   | 1 1 | 13.01 |
| PTHR12348-SF1   | 1 | 8 0 0   | 0 0 | 0 0 | 0 0 | 0 0   | 1 1 | 68.34 |
| PTHR12389       | 1 | 22 0 0  | 0 0 | 0 0 | 0 0 | 0 0   | 0 0 | 20.61 |
| PTHR12419       | 1 | 6 0 0   | 0 0 | 0 0 | 0 0 | 0 0   | 1 1 | 43.39 |
| PTHR12420       | 1 | 18 0 0  | 0 0 | 0 0 | 0 0 | 0 0   | 1 1 | 41.48 |
| PTHR12439       | 1 | 12 0 0  | 0 0 | 0 0 | 0 0 | 1 1   | 0 0 | 28.51 |
| PTHR12456       | 1 | 4 0 0   | 0 0 | 1 1 | 0 0 | 0 0   | 0 0 | 48.27 |
| PTHR12496       | 1 | 109 0 0 | 0 0 | 0 0 | 0 0 | 0 0   | 1 1 | 20.58 |
| PTHR12506       | 1 | 16 0 0  | 0 0 | 0 0 | 0 0 | 0 0   | 1 1 | 60.97 |
| PTHR12595       | 1 | 63 0 0  | 0 0 | 0 0 | 0 0 | 0 0   | 0 0 | 34.05 |
| PTHR12601       | 1 | 73 0 0  | 0 0 | 1 1 | 0 0 | 0 0   | 0 0 | 26.36 |
| PTHR12603       | 1 | 30 0 0  | 0 0 | 1 1 | 0 0 | 0 0   | 0 0 | 35.39 |
| PTHR12609       | 1 | 50 0 0  | 0 0 | 0 0 | 0 0 | 0 0   | 1 1 | 22.57 |
| PTHR12653       | 1 | 16 0 0  | 0 0 | 0 0 | 0 0 | 1 1   | 0 0 | 51.17 |
| PTHR12675       | 1 | 24 0 0  | 0 0 | 1 0 | 0 0 | 0 0   | 0 0 | 68.67 |
| PTHR12758       | 1 | 16 0 0  | 0 0 | 1 1 | 0 0 | 0 0   | 0 0 | 32.21 |
| PTHR12758-SF13  | 1 | 10 0 0  | 0 0 | 1 1 | 0 0 | 0 0   | 0 0 | 35.5  |
| PTHR12764       | 1 | 9 0 0   | 0 0 | 0 0 | 0 0 | 0 0   | 1 1 | 62.02 |
| PTHR12786-SF1   | 1 | 57 0 0  | 0 0 | 1 1 | 0 0 | 0 0   | 0 0 | 29.5  |
| PTHR12796       | 1 | 4 0 0   | 0 0 | 0 0 | 0 0 | 0 0   | 1 1 | 13.92 |
| PTHR12907       | 1 | 5 0 0   | 0 0 | 0 0 | 0 0 | 0 0   | 1 1 | 40.58 |
| PTHR12942       | 1 | 8 0 0   | 0 0 | 0 0 | 0 0 | 0 0   | 0 0 | 26    |
| PTHR12957       | 1 | 6 0 0   | 0 0 | 0 0 | 0 0 | 0 0   | 1 1 | 33.4  |
| PTHR12957-SF2   | 1 | 22 0 0  | 0 0 | 0 0 | 0 0 | 0 0   | 1 1 | 48.43 |
| PTHR12957-SF3   | 1 | 13 0 0  | 0 0 | 0 0 | 0 0 | 0 0   | 1 1 | 77.11 |
| PTHR12977       | 1 | 6 0 0   | 0 0 | 0 0 | 0 0 | 0 0   | 1 1 | 89.43 |
| PTHR12977-SF1   | 1 | 5 0 0   | 0 0 | 0 0 | 0 0 | 0 0   | 1 1 | 52.96 |
| PTHR12979       | 1 | 9 0 0   | 0 0 | 0 0 | 0 0 | 0 0   | 1 1 | 31.5  |
| PTHR13006       | 1 | 44 0 0  | 0 0 | 0 0 | 0 0 | 0 0   | 1 1 | 31.94 |
| PTHR13029       | 1 | 12 0 0  | 0 0 | 0 0 | 0 0 | 0 0   | 1 1 | 60.47 |
| PTHR13029-SF2   | 1 | 4 0 0   | 0 0 | 0 0 | 0 0 | 0 0   | 0 0 | 80.87 |
| PTHR13043       | 1 | 31 0 0  | 0 0 | 0 0 | 0 0 | 1 1   | 0 0 | 22.97 |
| PTHR13068       | 1 | 8 0 0   | 0 0 | 0 0 | 0 0 | 0 0   | 1 1 | 14.73 |
| PTHR13097       | 1 | 9 0 0   | 0 0 | 1 1 | 0 0 | 0 0   | 0 0 | 14.71 |
| PTHR13102       | 1 | 32 0 0  | 0 0 | 0 0 | 0 0 | 0 0   | 1 1 | 33.61 |
| PTHR13129       | 1 | 10 0 0  | 0 0 | 1 1 | 0 0 | 0 0   | 0 0 | 30.92 |
| PTHR13138       | 1 | 14 0 0  | 0 0 | 0 0 | 0 0 | 1 1   | 0 0 | 36.31 |
| PTHR13145       | 1 | 40 0 0  | 0 0 | 1 0 | 0 0 | 1 0   | 0 0 | 25.09 |
| PTHR13179       | 1 | 5 0 0   | 0 0 | 0 0 | 0 0 | 0 0   | 1 1 | 32.81 |
| PTHR13198       | 1 | 6 0 0   | 0 0 | 0 0 | 0 0 | 0 0   | 1 1 | 42.18 |
| PTHR13228       | 1 | 7 0 0   | 0 0 | 1 0 | 0 0 | 1 0   | 0 0 | 25.61 |
| PTHR13252-SF2   | 1 | 9 0 0   | 0 0 | 0 0 | 0 0 | 0 0   | 1 1 | 68.08 |
| PTHR13256       | 1 | 23 0 0  | 0 0 | 0 0 | 0 0 | 1 1   | 0 0 | 49.03 |
| PTHR13298       | 1 | 12 0 0  | 0 0 | 0 0 | 0 0 | 1 1</ |     |       |

|                 |   |         |     |     |     |     |     |       |
|-----------------|---|---------|-----|-----|-----|-----|-----|-------|
| PTHR13340       | 1 | 21 0 0  | 0 0 | 0 0 | 0 0 | 0 0 | 1 1 | 55.69 |
| PTHR13369       | 1 | 24 1 1  | 0 0 | 0 0 | 0 0 | 0 0 | 0 0 | 28.39 |
| PTHR13403-SF6   | 1 | 32 0 0  | 0 0 | 0 0 | 0 0 | 0 0 | 1 1 | 30.74 |
| PTHR13407       | 1 | 20 0 0  | 0 0 | 0 0 | 0 0 | 0 0 | 0 0 | 79.43 |
| PTHR13451       | 1 | 8 0 0   | 0 0 | 1 0 | 1 0 | 1 0 | 0 0 | 17.12 |
| PTHR13457       | 1 | 9 0 0   | 0 0 | 0 0 | 0 0 | 0 0 | 1 1 | 12.85 |
| PTHR13532       | 1 | 31 0 0  | 0 0 | 0 0 | 0 0 | 0 0 | 1 1 | 52.77 |
| PTHR13555-SF3   | 1 | 42 0 0  | 0 0 | 1 1 | 0 0 | 0 0 | 0 0 | 37.44 |
| PTHR13589-SF5   | 1 | 19 0 0  | 0 0 | 0 0 | 0 0 | 0 0 | 1 1 | 67.01 |
| PTHR13609       | 1 | 38 0 0  | 0 0 | 0 0 | 0 0 | 1 1 | 0 0 | 55.51 |
| PTHR13610       | 1 | 54 1 1  | 0 0 | 0 0 | 0 0 | 0 0 | 0 0 | 22.77 |
| PTHR13630       | 1 | 18 0 0  | 0 0 | 0 0 | 0 0 | 0 0 | 1 1 | 57.25 |
| PTHR13646       | 1 | 11 0 0  | 0 0 | 0 0 | 0 0 | 0 0 | 1 1 | 57.32 |
| PTHR13660       | 1 | 17 0 0  | 0 0 | 0 0 | 0 0 | 0 0 | 0 0 | 64.53 |
| PTHR13681-SF2   | 1 | 6 0 0   | 0 0 | 0 0 | 0 0 | 0 0 | 1 1 | 40.5  |
| PTHR13683-SF10  | 1 | 62 0 0  | 0 0 | 1 1 | 0 0 | 0 0 | 0 0 | 41.46 |
| PTHR13683-SF98  | 1 | 71 0 0  | 0 0 | 1 1 | 0 0 | 0 0 | 0 0 | 18.03 |
| PTHR13768-SF8   | 1 | 31 0 0  | 0 0 | 0 0 | 0 0 | 0 0 | 1 1 | 55.36 |
| PTHR13773       | 1 | 7 1 1   | 0 0 | 0 0 | 0 0 | 0 0 | 0 0 | 58.75 |
| PTHR13800       | 1 | 45 0 0  | 0 0 | 0 0 | 0 0 | 0 0 | 1 1 | 21.63 |
| PTHR13806-SF9   | 1 | 5 1 1   | 0 0 | 0 0 | 0 0 | 0 0 | 0 0 | 25.43 |
| PTHR13815       | 1 | 24 0 0  | 0 0 | 0 0 | 0 0 | 0 0 | 1 1 | 42.89 |
| PTHR13824-SF36  | 1 | 24 0 0  | 0 0 | 0 0 | 0 0 | 1 1 | 0 0 | 17.98 |
| PTHR13847-SF11  | 1 | 4 1 1   | 0 0 | 0 0 | 0 0 | 0 0 | 0 0 | 42.44 |
| PTHR13872       | 1 | 95 0 0  | 0 0 | 1 0 | 1 0 | 1 0 | 1 0 | 51.36 |
| PTHR13872-SF2   | 1 | 10 0 0  | 0 0 | 0 0 | 0 0 | 1 0 | 1 0 | 48.01 |
| PTHR13878       | 1 | 78 1 0  | 0 0 | 0 0 | 0 0 | 0 0 | 0 0 | 25.27 |
| PTHR13878-SF1   | 1 | 12 1 1  | 0 0 | 0 0 | 0 0 | 0 0 | 0 0 | 27.57 |
| PTHR13886       | 1 | 16 0 0  | 0 0 | 0 0 | 0 0 | 0 0 | 1 1 | 41.88 |
| PTHR13895       | 1 | 3 0 0   | 0 0 | 0 0 | 0 0 | 0 0 | 1 1 | 41.49 |
| PTHR13902-SF4   | 1 | 5 0 0   | 0 0 | 1 1 | 0 0 | 0 0 | 0 0 | 70.45 |
| PTHR14095       | 1 | 75 0 0  | 0 0 | 0 0 | 0 0 | 0 0 | 1 1 | 44.68 |
| PTHR14127       | 1 | 46 0 0  | 0 0 | 1 0 | 0 0 | 0 0 | 1 0 | 34.55 |
| PTHR14131       | 1 | 5 0 0   | 0 0 | 0 0 | 0 0 | 0 0 | 1 1 | 59.87 |
| PTHR14146       | 1 | 23 0 0  | 0 0 | 1 0 | 0 0 | 1 0 | 1 0 | 34.08 |
| PTHR14167-SF3   | 1 | 6 0 0   | 0 0 | 0 0 | 0 0 | 0 0 | 1 1 | 90.07 |
| PTHR14187-SF5   | 1 | 35 0 0  | 0 0 | 0 0 | 0 0 | 1 0 | 1 0 | 30.68 |
| PTHR14194       | 1 | 18 0 0  | 0 0 | 0 0 | 0 0 | 1 1 | 0 0 | 10.44 |
| PTHR14304-SF2   | 1 | 9 0 0   | 0 0 | 1 1 | 0 0 | 0 0 | 0 0 | 40.72 |
| PTHR14398       | 1 | 14 0 0  | 0 0 | 0 0 | 0 0 | 0 0 | 1 1 | 64.29 |
| PTHR14430       | 1 | 11 0 0  | 0 0 | 0 0 | 0 0 | 1 1 | 0 0 | 63.19 |
| PTHR14488       | 1 | 12 0 0  | 0 0 | 0 0 | 0 0 | 0 0 | 1 1 | 49.1  |
| PTHR14494       | 1 | 11 0 0  | 0 0 | 1 1 | 0 0 | 0 0 | 0 0 | 28.88 |
| PTHR14678       | 1 | 9 0 0   | 0 0 | 0 0 | 0 0 | 1 1 | 0 0 | 73.46 |
| PTHR14790       | 1 | 7 0 0   | 0 0 | 0 0 | 0 0 | 1 0 | 1 0 | 48.95 |
| PTHR14791       | 1 | 11 0 0  | 0 0 | 0 0 | 0 0 | 0 0 | 1 1 | 36    |
| PTHR14885       | 1 | 23 0 0  | 0 0 | 1 1 | 0 0 | 0 0 | 0 0 | 28.14 |
| PTHR14898       | 1 | 11 0 0  | 0 0 | 0 0 | 0 0 | 1 1 | 0 0 | 32.96 |
| PTHR14905-SF2   | 1 | 20 0 0  | 0 0 | 0 0 | 0 0 | 0 0 | 1 1 | 51.23 |
| PTHR15031       | 1 | 4 1 1   | 0 0 | 0 0 | 0 0 | 0 0 | 0 0 | 26.44 |
| PTHR15032-SF2   | 1 | 15 0 0  | 0 0 | 1 0 | 0 0 | 0 0 | 1 0 | 59.48 |
| PTHR15065       | 1 | 6 0 0   | 0 0 | 0 0 | 0 0 | 0 0 | 1 1 | 71.33 |
| PTHR15245-SF3   | 1 | 4 0 0   | 0 0 | 0 0 | 0 0 | 1 1 | 0 0 | 33.74 |
| PTHR15245-SF4   | 1 | 17 0 0  | 0 0 | 0 0 | 0 0 | 1 1 | 0 0 | 65.6  |
| PTHR15326       | 1 | 24 0 0  | 0 0 | 0 0 | 0 0 | 0 0 | 1 1 | 30.09 |
| PTHR15491       | 1 | 9 0 0   | 0 0 | 0 0 | 0 0 | 0 0 | 1 1 | 71.45 |
| PTHR15503       | 1 | 25 0 0  | 0 0 | 0 0 | 0 0 | 1 1 | 0 0 | 34.1  |
| PTHR15507-SF1   | 1 | 5 0 0   | 0 0 | 0 0 | 0 0 | 0 0 | 1 1 | 49.73 |
| PTHR15535       | 1 | 4 1 1   | 0 0 | 0 0 | 0 0 | 0 0 | 0 0 | 57.33 |
| PTHR15545       | 1 | 9 0 0   | 0 0 | 0 0 | 0 0 | 0 0 | 1 1 | 46.8  |
| PTHR15577       | 1 | 18 0 0  | 0 0 | 0 0 | 0 0 | 0 0 | 1 1 | 54.74 |
| PTHR15633       | 1 | 7 0 0   | 0 0 | 0 0 | 0 0 | 0 0 | 1 1 | 19.13 |
| PTHR15665       | 1 | 17 0 0  | 0 0 | 0 0 | 0 0 | 0 0 | 1 1 | 53.24 |
| PTHR15696       | 1 | 34 0 0  | 0 0 | 1 0 | 0 0 | 1 0 | 1 0 | 27.53 |
| PTHR15722-SF3   | 1 | 11 0 0  | 0 0 | 0 0 | 0 0 | 0 0 | 1 1 | 87.07 |
| PTHR15726       | 1 | 7 0 0   | 0 0 | 0 0 | 0 0 | 0 0 | 1 1 | 38.08 |
| PTHR15741       | 1 | 10 0 0  | 0 0 | 0 0 | 0 0 | 0 0 | 1 1 | 77.67 |
| PTHR15741-SF15  | 1 | 4 0 0   | 0 0 | 0 0 | 0 0 | 0 0 | 1 1 | 82.33 |
| PTHR15818       | 1 | 32 0 0  | 0 0 | 1 1 | 0 0 | 0 0 | 0 0 | 41.63 |
| PTHR15836       | 1 | 19 0 0  | 0 0 | 0 0 | 0 0 | 0 0 | 1 1 | 50.56 |
| PTHR15892       | 1 | 19 0 0  | 0 0 | 0 0 | 0 0 | 0 0 | 1 1 | 59.22 |
| PTHR15904-SF2   | 1 | 20 0 0  | 0 0 | 0 0 | 0 0 | 0 0 | 1 1 | 56.45 |
| PTHR15921       | 1 | 10 0 0  | 0 0 | 0 0 | 0 0 | 0 0 | 1 1 | 20.93 |
| PTHR15950       | 1 | 15 0 0  | 0 0 | 0 0 | 0 0 | 0 0 | 1 1 | 56.95 |
| PTHR15950-SF1   | 1 | 5 0 0   | 0 0 | 0 0 | 0 0 | 0 0 | 1 1 | 96.58 |
| PTHR15959       | 1 | 24 0 0  | 0 0 | 0 0 | 0 0 | 1 1 | 0 0 | 24.25 |
| PTHR15963       | 1 | 3 0 0   | 1 1 | 0 0 | 0 0 | 0 0 | 0 0 | 100   |
| PTHR16012       | 1 | 12 0 0  | 0 0 | 1 1 | 0 0 | 0 0 | 0 0 | 19.72 |
| PTHR16023       | 1 | 5 0 0   | 0 0 | 0 0 | 0 0 | 0 0 | 1 0 | 29.87 |
| PTHR16048       | 1 | 42 0 0  | 0 0 | 0 0 | 0 0 | 0 0 | 1 1 | 48.28 |
| PTHR16055       | 1 | 27 0 0  | 0 0 | 0 0 | 0 0 | 0 0 | 1 1 | 44.25 |
| PTHR16193       | 1 | 40 0 0  | 0 0 | 0 0 | 0 0 | 1 1 | 0 0 | 22.05 |
| PTHR16222       | 1 | 4 1 1   | 0 0 | 0 0 | 0 0 | 0 0 | 0 0 | 43.49 |
| PTHR16288       | 1 | 6 0 0   | 0 0 | 0 0 | 0 0 | 1 1 | 0 0 | 39.84 |
| PTHR16453       | 1 | 22 0 0  | 0 0 | 0 0 | 0 0 | 0 0 | 1 1 | 37.9  |
| PTHR17695       | 1 | 29 0 0  | 0 0 | 1 0 | 0 0 | 1 0 | 1 0 | 29.13 |
| PTHR18460       | 1 | 54 0 0  | 0 0 | 1 1 | 0 0 | 0 0 | 0 0 | 12.2  |
| PTHR18895-SF2   | 1 | 7 1 1   | 0 0 | 0 0 | 0 0 | 0 0 | 0 0 | 36.83 |
| PTHR18898       | 1 | 14 0 0  | 0 0 | 0 0 | 0 0 | 0 0 | 0 0 | 18.24 |
| PTHR18905-SF3   | 1 | 10 0 0  | 0 0 | 0 0 | 0 0 | 0 0 | 1 1 | 58.7  |
| PTHR18905-SF4   | 1 | 16 0 0  | 0 0 | 0 0 | 0 0 | 0 0 | 1 1 | 71.17 |
| PTHR18914       | 1 | 10 0 0  | 0 0 | 0 0 | 0 0 | 0 0 | 1 1 | 82.64 |
| PTHR18914-SF1   | 1 | 4 0 0   | 0 0 | 0 0 | 0 0 | 0 0 | 1 1 | 86    |
| PTHR18929       | 1 | 36 0 0  | 0 0 | 0 0 | 0 0 | 0 0 | 1 1 | 4.91  |
| PTHR18937-SF10  | 1 | 27 2 2  | 0 0 | 0 0 | 0 0 | 0 0 | 0 0 | 8.78  |
| PTHR18939       | 1 | 6 0 0   | 0 0 | 0 0 | 0 0 | 0 0 | 1 1 | 54.91 |
| PTHR18958-SF181 | 1 | 11 1 1  | 0 0 | 0 0 | 0 0 | 0 0 | 0 0 | 38.87 |
| PTHR18958-SF294 | 1 | 8 0 0   | 0 0 | 0 0 | 0 0 | 1 1 | 0 0 | 17.74 |
| PTHR18958-SF80  | 1 | 104 0 0 | 0 0 | 1 1 | 0 0 | 0 0 | 0 0 | 17.32 |
| PTHR18966-SF2   | 1 | 12 0 0  | 0 0 | 0 0 | 0 0 | 0 0 | 1 1 | 34.35 |
| PTHR18968       | 1 | 18 1 0  | 1 0 | 0 0 | 0 0 | 0 0 | 0 0 | 11.61 |
| PTHR18968-SF3   | 1 | 3 1 1   | 0 0 | 0 0 | 0 0 | 0 0 | 0 0 | 53.17 |
| PTHR19237-SF2   | 1 | 17 0 0  | 0 0 | 0 0 | 0 0 | 1 1 | 0 0 | 75.45 |
| PTHR19237-SF3   | 1 | 13 0 0  | 0 0 | 0 0 | 0 0 | 0 0 | 1 1 | 68.82 |
| PTHR19265       | 1 | 12 0 0  | 0 0 | 0 0 | 0 0 | 0 0 | 1 1 | 40.9  |
| PTHR19269-SF11  | 1 | 4 0 0   | 0 0 | 0 0 | 0 0 | 0 0 | 1 1 | 57.44 |
| PTHR19282       | 1 | 12 0 0  | 0 0 | 1 0 | 1 0 | 0 0 | 1 0 | 8.57  |
| PTHR19288       | 1 | 51 1 1  | 0 0 | 0 0 | 0 0 | 0 0 | 0 0 | 14.76 |
| PTHR19305       | 1 | 17 0 0  | 0 0 | 0 0 | 0 0 | 0 0 | 1 1 | 33.74 |
| PTHR19376-SF3   | 1 | 14 0 0  | 0 0 | 0 0 | 0 0 | 1 1 | 0 0 | 74.85 |
| PTHR19410-SF18  | 1 | 23 1 1  | 0 0 | 0 0 | 0 0 | 0 0 | 0 0 | 17.79 |
| PTHR19410-SF95  | 1 | 31 1 1  | 0 0 | 0 0 | 0 0 | 0 0 | 0 0 | 15.23 |
| PTHR19957-SF1   | 1 | 10 0 0  | 0 0 | 0 0 | 0 0 | 0 0 | 1 1 | 55.81 |
| PTHR19959-SF22  | 1 | 9 1 0   | 0 0 | 0 0 | 0 0 | 0 0 | 1 0 | 69.16 |
| PTHR20837       | 1 | 38 0 0  | 0 0 | 0 0 | 0 0 | 0 0 | 1 1 | 22.12 |
| PTHR20870       | 1 | 31 0 0  | 0 0 | 0 0 | 1 1 | 0 0 | 0 0 | 45.82 |
| PTHR20957       | 1 | 35 0 0  | 0 0 | 1 1 | 0 0 | 0 0 | 0 0 | 46.85 |
| PTHR20976       | 1 | 14 0 0  | 0 0 | 0 0 | 0 0 | 0 0 | 1 1 | 34.6  |
| PTHR20985       | 1 | 16 0 0  | 0 0 | 0 0 | 0 0 | 0 0 | 0 0 | 59.89 |
| PTHR21020       | 1 | 17 0 0  | 0 0 | 0 0 | 0 0 | 0 0 | 1 1 | 52.84 |
| PTHR21032       | 1 | 13 0 0  | 0 0 | 0 0 | 0 0 | 1 1 | 0 0 | 48.81 |
| PTHR21035       | 1 | 28 0 0  | 0 0 | 0 0 | 0 0 | 0 0 | 1 1 | 34.51 |
| PTHR21059       | 1 | 11 0 0  | 0 0 | 0 0 | 0 0 | 0 0 | 0 0 | 72.77 |
| PTHR21066       | 1 | 64 0 0  | 0 0 | 0 0 | 0 0 | 0 0 | 1 1 | 22.54 |
| PTHR21075       | 1 | 17 1 1  | 0 0 | 0 0 | 0 0 | 0 0 | 0 0 | 32.9  |
| PTHR21079-SF1   | 1 | 13 0 0  | 0 0 | 0 0 | 0 0 | 0 0 | 1 1 | 61.31 |
| PTHR21079-SF2   | 1 | 13 0 0  | 0 0 | 0 0 | 0 0 | 0 0 | 0 0 | 53.56 |
| PTHR21103       | 1 | 15 0 0  | 0 0 | 0 0 | 0 0 | 0 0 | 0 0 | 36.13 |
| PTHR21104       | 1 | 29 0 0  | 0 0 | 0 0 | 0 0 | 0 0 | 1 1 | 57.89 |
| PTHR21143       | 1 | 18 0 0  | 0 0 | 0 0 | 0 0 | 0 0 | 1 1 | 42.19 |
| PTHR21177       | 1 | 14 0 0  | 0 0 | 0 0 | 0 0 | 0 0 | 1 1 | 79.4  |
| PTHR21180-SF2   | 1 | 28 1 1  | 0 0 | 0 0 | 0 0 | 0 0 | 0 0 | 42.38 |
| PTHR21190       | 1 | 17 0 0  | 0 0 | 0 0 | 0 0 | 0 0 | 1 1 | 55.56 |
| PTHR21205       | 1 | 11 0 0  | 0 0 | 0 0 | 0 0 | 0 0 | 1 1 | 40.69 |
| PTHR21209       | 1 | 15 0 0  | 0 0 | 0 0 | 0 0 | 0 0 | 1 1 | 92.77 |
| PTHR21233       | 1 | 15 0 0  | 0 0 | 0 0 | 0 0 | 0 0 | 1 1 | 48.16 |
| PTHR21269       | 1 | 14 0 0  | 0 0 | 0 0 | 0 0 | 0 0 | 1 1 | 54.92 |
| PTHR21278       | 1 | 10 0 0  | 0 0 | 0 0 | 0 0 | 0 0 | 0 0 | 54.55 |
| PTHR21287       | 1 | 71 0 0  | 0 0 | 0 0 | 0 0 | 0 0 | 0 0 | 33.53 |
| PTHR21289       | 1 | 9 0 0   | 0 0 | 0 0 | 0 0 | 0 0 | 1 1 | 54.47 |
| PTHR21290-SF7   | 1 | 15 0 0  | 0 0 | 0 0 | 0 0 | 0 0 | 1 1 | 77.34 |
| PTHR21344       | 1 | 41 0 0  | 0 0 | 0 0 | 0 0 | 0 0 | 1 1 | 41.49 |
| PTHR21361       | 1 | 5 0 0   | 0 0 | 0 0 | 0 0 | 0 0 | 1 1 | 47.18 |
| PTHR21373       | 1 | 20 0 0  | 0 0 | 1 0 | 0 0 | 1 0 | 0 0 | 21.9  |
| PTHR21377       | 1 | 5 0 0   | 0 0 | 0 0 | 0 0 | 1 1 | 0 0 | 94.08 |
| PTHR21383       | 1 | 12 0 0  | 0 0 | 0 0 | 0 0 | 0 0 | 1 1 | 78.85 |
| PTHR21405       | 1 | 22 1 1  | 0 0 | 0 0 | 0 0 | 0 0 | 0 0 | 32.33 |

|                 |   |         |     |     |     |     |     |       |
|-----------------|---|---------|-----|-----|-----|-----|-----|-------|
| PTHR21422-SF3   | 1 | 13 0 0  | 0 0 | 1 1 | 0 0 | 0 0 | 0 0 | 58.39 |
| PTHR21440       | 1 | 15 0 0  | 0 0 | 0 0 | 0 0 | 0 0 | 1 1 | 27.05 |
| PTHR21485       | 1 | 5 1 1   | 0 0 | 0 0 | 0 0 | 0 0 | 0 0 | 41.95 |
| PTHR21489       | 1 | 7 0 0   | 0 0 | 0 0 | 0 0 | 1 0 | 1 1 | 58.73 |
| PTHR21494       | 1 | 8 0 0   | 0 0 | 0 0 | 0 0 | 1 1 | 0 0 | 22    |
| PTHR21495       | 1 | 5 0 0   | 0 0 | 0 0 | 0 0 | 0 0 | 1 1 | 40.26 |
| PTHR21495-SF1   | 1 | 12 0 0  | 0 0 | 0 0 | 0 0 | 0 0 | 0 0 | 48.47 |
| PTHR21520       | 1 | 17 0 0  | 0 0 | 0 0 | 0 0 | 0 0 | 0 0 | 58.91 |
| PTHR21528       | 1 | 62 0 0  | 0 0 | 1 1 | 0 0 | 0 0 | 0 0 | 23.81 |
| PTHR21538       | 1 | 10 0 0  | 0 0 | 0 0 | 0 0 | 0 0 | 1 1 | 40.18 |
| PTHR21540       | 1 | 6 0 0   | 0 0 | 1 0 | 0 0 | 1 0 | 0 0 | 60.4  |
| PTHR21546       | 1 | 13 0 0  | 0 0 | 0 0 | 0 0 | 0 0 | 1 1 | 76.69 |
| PTHR21564       | 1 | 38 0 0  | 0 0 | 0 0 | 0 0 | 0 0 | 0 0 | 70.99 |
| PTHR21576       | 1 | 8 0 0   | 0 0 | 0 0 | 0 0 | 0 0 | 0 0 | 8.44  |
| PTHR21579-SF9   | 1 | 12 0 0  | 0 0 | 0 0 | 0 0 | 0 0 | 1 1 | 86.01 |
| PTHR21582       | 1 | 21 0 0  | 0 0 | 0 0 | 0 0 | 0 0 | 1 1 | 38.79 |
| PTHR21596-SF5   | 1 | 12 0 0  | 0 0 | 1 1 | 0 0 | 0 0 | 0 0 | 44.14 |
| PTHR21600       | 1 | 3 1 0   | 0 0 | 0 0 | 1 0 | 0 0 | 0 0 | 27.14 |
| PTHR21618       | 1 | 19 0 0  | 0 0 | 0 0 | 0 0 | 0 0 | 1 1 | 75.52 |
| PTHR21625       | 1 | 71 0 0  | 0 0 | 0 0 | 0 0 | 0 0 | 0 0 | 16.91 |
| PTHR21626       | 1 | 17 0 0  | 0 0 | 0 0 | 0 0 | 0 0 | 1 1 | 51.47 |
| PTHR21631       | 1 | 41 0 0  | 0 0 | 0 0 | 0 0 | 1 1 | 0 0 | 30.1  |
| PTHR21654       | 1 | 10 0 0  | 0 0 | 1 1 | 0 0 | 0 0 | 0 0 | 32.4  |
| PTHR21661-SF2   | 1 | 10 1 1  | 0 0 | 0 0 | 0 0 | 0 0 | 0 0 | 25.91 |
| PTHR21663       | 1 | 72 0 0  | 0 0 | 0 0 | 0 0 | 1 1 | 0 0 | 30.22 |
| PTHR21666-SF4   | 1 | 51 1 1  | 0 0 | 0 0 | 0 0 | 0 0 | 0 0 | 48.71 |
| PTHR21678       | 1 | 42 0 0  | 0 0 | 0 0 | 0 0 | 0 0 | 1 1 | 31.24 |
| PTHR21695       | 1 | 8 0 0   | 0 0 | 0 0 | 0 0 | 0 0 | 1 1 | 59.65 |
| PTHR21713       | 1 | 8 0 0   | 0 0 | 0 0 | 0 0 | 0 0 | 1 1 | 55.15 |
| PTHR21725       | 1 | 21 0 0  | 0 0 | 1 0 | 0 0 | 0 0 | 1 0 | 23.51 |
| PTHR21726-SF3   | 1 | 9 0 0   | 0 0 | 1 1 | 0 0 | 0 0 | 0 0 | 46.73 |
| PTHR21726-SF4   | 1 | 19 0 0  | 0 0 | 1 1 | 0 0 | 0 0 | 0 0 | 23.45 |
| PTHR21726-SF5   | 1 | 4 0 0   | 0 0 | 1 1 | 0 0 | 0 0 | 0 0 | 48.37 |
| PTHR21735       | 1 | 11 0 0  | 0 0 | 0 0 | 0 0 | 0 0 | 1 1 | 75.2  |
| PTHR21736-SF12  | 1 | 19 0 0  | 0 0 | 1 0 | 0 0 | 0 0 | 1 0 | 51.75 |
| PTHR21776       | 1 | 13 0 0  | 0 0 | 0 0 | 0 0 | 0 0 | 0 0 | 77.74 |
| PTHR21790       | 1 | 11 0 0  | 0 0 | 0 0 | 0 0 | 0 0 | 0 0 | 60.22 |
| PTHR21838       | 1 | 28 0 0  | 0 0 | 0 0 | 0 0 | 0 0 | 1 1 | 52.97 |
| PTHR21943       | 1 | 19 0 0  | 0 0 | 0 0 | 0 0 | 0 0 | 0 0 | 60.12 |
| PTHR22050       | 1 | 12 0 0  | 0 0 | 1 1 | 0 0 | 0 0 | 0 0 | 41.72 |
| PTHR22093       | 1 | 46 0 0  | 0 0 | 1 1 | 0 0 | 0 0 | 0 0 | 32.11 |
| PTHR22128       | 1 | 9 0 0   | 0 0 | 0 0 | 0 0 | 0 0 | 1 1 | 81.56 |
| PTHR22183       | 1 | 19 0 0  | 0 0 | 0 0 | 0 0 | 0 0 | 1 1 | 28.91 |
| PTHR22208       | 1 | 13 0 0  | 0 0 | 0 0 | 0 0 | 0 0 | 1 1 | 71.77 |
| PTHR22501       | 1 | 12 0 0  | 0 0 | 0 0 | 0 0 | 0 0 | 1 1 | 52.15 |
| PTHR22506       | 1 | 14 0 0  | 0 0 | 0 0 | 0 0 | 0 0 | 1 1 | 79.9  |
| PTHR22572-SF15  | 1 | 31 1 1  | 0 0 | 0 0 | 0 0 | 0 0 | 0 0 | 20.58 |
| PTHR22579       | 1 | 12 0 0  | 0 0 | 0 0 | 0 0 | 0 0 | 1 1 | 45.13 |
| PTHR22602       | 1 | 44 1 0  | 0 0 | 1 0 | 0 0 | 0 0 | 0 0 | 59.69 |
| PTHR22604       | 1 | 10 1 1  | 0 0 | 0 0 | 0 0 | 0 0 | 0 0 | 5.59  |
| PTHR22613       | 1 | 13 0 0  | 0 0 | 0 0 | 0 0 | 0 0 | 1 1 | 77.89 |
| PTHR22619       | 1 | 33 0 0  | 0 0 | 0 0 | 0 0 | 0 0 | 1 1 | 37.79 |
| PTHR22621       | 1 | 5 0 0   | 0 0 | 0 0 | 0 0 | 0 0 | 1 1 | 63.78 |
| PTHR22652       | 1 | 16 0 0  | 0 0 | 0 0 | 0 0 | 0 0 | 1 1 | 25.83 |
| PTHR22655       | 1 | 24 0 0  | 0 0 | 0 0 | 0 0 | 0 0 | 1 1 | 32.32 |
| PTHR22707       | 1 | 9 0 0   | 0 0 | 0 0 | 0 0 | 0 0 | 1 1 | 76.06 |
| PTHR22710       | 1 | 7 0 0   | 0 0 | 0 0 | 0 0 | 0 0 | 1 1 | 66.56 |
| PTHR22713       | 1 | 22 0 0  | 0 0 | 0 0 | 0 0 | 0 0 | 1 1 | 50.35 |
| PTHR22729       | 1 | 4 0 0   | 0 0 | 0 0 | 0 0 | 0 0 | 1 1 | 34.99 |
| PTHR22795       | 1 | 35 0 0  | 0 0 | 0 0 | 0 0 | 1 1 | 0 0 | 19.73 |
| PTHR22795-SF1   | 1 | 6 0 0   | 0 0 | 0 0 | 0 0 | 1 1 | 0 0 | 40.44 |
| PTHR22814-SF14  | 1 | 15 0 0  | 0 0 | 1 1 | 0 0 | 0 0 | 0 0 | 35.86 |
| PTHR22814-SF5   | 1 | 35 0 0  | 0 0 | 1 1 | 0 0 | 0 0 | 0 0 | 33.19 |
| PTHR22826-SF19  | 1 | 19 0 0  | 0 0 | 0 0 | 0 0 | 0 0 | 1 1 | 51.61 |
| PTHR22847-SF49  | 1 | 4 0 0   | 0 0 | 0 0 | 0 0 | 1 1 | 0 0 | 86.84 |
| PTHR22854       | 1 | 17 1 0  | 1 0 | 0 0 | 0 0 | 0 0 | 0 0 | 91.19 |
| PTHR22854-SF2   | 1 | 4 1 1   | 0 0 | 0 0 | 0 0 | 0 0 | 0 0 | 100   |
| PTHR22901       | 1 | 6 1 1   | 0 0 | 0 0 | 0 0 | 0 0 | 0 0 | 40.83 |
| PTHR22908-SF14  | 1 | 14 0 0  | 0 0 | 0 0 | 0 0 | 1 1 | 0 0 | 16.31 |
| PTHR22915-SF2   | 1 | 9 1 1   | 0 0 | 0 0 | 0 0 | 0 0 | 0 0 | 60.44 |
| PTHR22928       | 1 | 10 0 0  | 0 0 | 0 0 | 0 0 | 1 0 | 1 0 | 31.13 |
| PTHR22930       | 1 | 130 0 0 | 0 0 | 1 1 | 0 0 | 0 0 | 0 0 | 15.78 |
| PTHR22960       | 1 | 3 1 1   | 0 0 | 0 0 | 0 0 | 0 0 | 0 0 | 33.45 |
| PTHR22979-SF2   | 1 | 13 0 0  | 0 0 | 0 0 | 0 0 | 0 0 | 1 1 | 76.35 |
| PTHR22985-SF54  | 1 | 5 0 0   | 0 0 | 0 0 | 0 0 | 0 0 | 1 1 | 96.02 |
| PTHR23011       | 1 | 13 0 0  | 0 0 | 0 0 | 0 0 | 0 0 | 1 1 | 45.74 |
| PTHR23048       | 1 | 152 0 0 | 0 0 | 0 0 | 0 0 | 0 0 | 1 1 | 38.66 |
| PTHR23050-SF7   | 1 | 12 0 0  | 0 0 | 0 0 | 0 0 | 0 0 | 1 1 | 57.62 |
| PTHR23053       | 1 | 20 0 0  | 0 0 | 0 0 | 0 0 | 2 2 | 0 0 | 18.32 |
| PTHR23056-SF4   | 1 | 17 0 0  | 0 0 | 1 1 | 0 0 | 0 0 | 0 0 | 47.26 |
| PTHR23057       | 1 | 49 0 0  | 0 0 | 0 0 | 0 0 | 1 0 | 1 0 | 51.11 |
| PTHR23068       | 1 | 15 0 0  | 0 0 | 1 1 | 0 0 | 0 0 | 0 0 | 29.56 |
| PTHR23083-SF8   | 1 | 14 0 0  | 0 0 | 0 0 | 0 0 | 0 0 | 1 1 | 43.25 |
| PTHR23088       | 1 | 22 1 0  | 0 0 | 0 0 | 0 0 | 1 0 | 0 0 | 27.02 |
| PTHR23104       | 1 | 64 0 0  | 0 0 | 0 0 | 0 0 | 0 0 | 1 1 | 40.17 |
| PTHR23110-SF20  | 1 | 9 0 0   | 0 0 | 0 0 | 0 0 | 0 0 | 1 1 | 38.85 |
| PTHR23110-SF2   | 1 | 16 0 0  | 0 0 | 0 0 | 0 0 | 0 0 | 1 1 | 78.69 |
| PTHR23116       | 1 | 7 0 0   | 0 0 | 0 0 | 0 0 | 0 0 | 1 1 | 70.26 |
| PTHR23116-SF4   | 1 | 6 0 0   | 0 0 | 0 0 | 0 0 | 0 0 | 1 1 | 93.98 |
| PTHR23125-SF18  | 1 | 9 0 0   | 0 0 | 0 0 | 0 0 | 0 0 | 1 1 | 52.54 |
| PTHR23133       | 1 | 4 1 1   | 0 0 | 0 0 | 0 0 | 0 0 | 0 0 | 32.34 |
| PTHR23135       | 1 | 6 1 1   | 0 0 | 0 0 | 0 0 | 0 0 | 0 0 | 23.4  |
| PTHR23139-SF4   | 1 | 4 0 0   | 0 0 | 0 0 | 0 0 | 1 1 | 0 0 | 55.7  |
| PTHR23140       | 1 | 16 0 0  | 0 0 | 0 0 | 0 0 | 1 1 | 0 0 | 55.36 |
| PTHR23154-SF117 | 1 | 7 1 1   | 0 0 | 0 0 | 0 0 | 0 0 | 0 0 | 25.47 |
| PTHR23155-SF15  | 1 | 12 0 0  | 0 0 | 1 1 | 0 0 | 0 0 | 0 0 | 48.31 |
| PTHR23155-SF22  | 1 | 20 0 0  | 0 0 | 1 1 | 0 0 | 0 0 | 0 0 | 24.14 |
| PTHR23155-SF39  | 1 | 7 0 0   | 0 0 | 1 1 | 0 0 | 0 0 | 0 0 | 30.37 |
| PTHR23155-SF6   | 1 | 47 1 1  | 0 0 | 0 0 | 0 0 | 0 0 | 0 0 | 56.33 |
| PTHR23160       | 1 | 82 0 0  | 0 0 | 1 1 | 0 0 | 0 0 | 0 0 | 21.29 |
| PTHR23187       | 1 | 15 0 0  | 0 0 | 0 0 | 0 0 | 0 0 | 1 1 | 20.81 |
| PTHR23199       | 1 | 43 0 0  | 0 0 | 0 0 | 0 0 | 0 0 | 1 1 | 38.97 |
| PTHR23202       | 1 | 5 0 0   | 0 0 | 0 0 | 0 0 | 0 0 | 1 1 | 44.35 |
| PTHR23213-SF27  | 1 | 5 0 0   | 0 0 | 0 0 | 0 0 | 0 0 | 0 0 | 25.83 |
| PTHR23223       | 1 | 21 0 0  | 0 0 | 0 0 | 0 0 | 1 0 | 1 0 | 24.64 |
| PTHR23223-SF21  | 1 | 9 0 0   | 0 0 | 0 0 | 0 0 | 1 1 | 0 0 | 58.05 |
| PTHR23224-SF31  | 1 | 5 0 0   | 0 0 | 0 0 | 0 0 | 0 0 | 1 1 | 85.25 |
| PTHR23224-SF467 | 1 | 13 0 0  | 0 0 | 0 0 | 0 0 | 0 0 | 1 1 | 61.69 |
| PTHR23224-SF471 | 1 | 7 0 0   | 0 0 | 0 0 | 0 0 | 0 0 | 1 1 | 80.9  |
| PTHR23224-SF473 | 1 | 10 0 0  | 0 0 | 0 0 | 0 0 | 0 0 | 1 1 | 52.52 |
| PTHR23227       | 1 | 7 0 0   | 0 0 | 0 0 | 0 0 | 0 0 | 1 1 | 78.59 |
| PTHR23227-SF1   | 1 | 16 0 0  | 0 0 | 0 0 | 0 0 | 0 0 | 1 1 | 35.55 |
| PTHR23228-SF13  | 1 | 22 0 0  | 0 0 | 0 0 | 0 0 | 0 0 | 1 1 | 62.97 |
| PTHR23258-SF433 | 1 | 14 0 0  | 0 0 | 1 1 | 0 0 | 0 0 | 0 0 | 21.81 |
| PTHR23264       | 1 | 24 1 0  | 1 0 | 0 0 | 0 0 | 0 0 | 0 0 | 25.44 |
| PTHR23273       | 1 | 16 0 0  | 0 0 | 1 1 | 0 0 | 0 0 | 0 0 | 18.86 |
| PTHR23289       | 1 | 6 1 1   | 0 0 | 0 0 | 0 0 | 0 0 | 0 0 | 33.6  |
| PTHR23304       | 1 | 23 1 1  | 0 0 | 0 0 | 0 0 | 0 0 | 0 0 | 45.61 |
| PTHR23308       | 1 | 16 0 0  | 0 0 | 0 0 | 0 0 | 0 0 | 1 1 | 51.81 |
| PTHR23308-SF7   | 1 | 5 0 0   | 0 0 | 0 0 | 0 0 | 0 0 | 1 1 | 35.98 |
| PTHR23316       | 1 | 54 0 0  | 0 0 | 1 1 | 0 0 | 0 0 | 0 0 | 5.7   |
| PTHR23319       | 1 | 24 0 0  | 0 0 | 0 0 | 0 0 | 1 1 | 0 0 | 32.25 |
| PTHR23329-SF1   | 1 | 4 0 0   | 0 0 | 0 0 | 1 1 | 0 0 | 0 0 | 27.24 |
| PTHR23331       | 1 | 18 0 0  | 0 0 | 0 0 | 0 0 | 0 0 | 0 0 | 21.48 |
| PTHR23358       | 1 | 26 0 0  | 0 0 | 0 0 | 0 0 | 0 0 | 1 1 | 46.09 |
| PTHR23402-SF1   | 1 | 8 0 0   | 0 0 | 0 0 | 0 0 | 0 0 | 0 0 | 46.34 |
| PTHR23427       | 1 | 4 1 1   | 0 0 | 0 0 | 0 0 | 0 0 | 0 0 | 57.8  |
| SM00085         | 1 | 92 0 0  | 0 0 | 0 0 | 0 0 | 0 0 | 2 2 | 33.43 |
| TIGR00046       | 1 | 10 1 0  | 0 0 | 1 0 | 0 0 | 0 0 | 0 0 | 45.67 |
| TIGR00238       | 1 | 6 0 0   | 0 0 | 0 0 | 0 0 | 1 1 | 0 0 | 37.5  |
| TIGR00407       | 1 | 4 0 0   | 0 0 | 0 0 | 0 0 | 0 0 | 1 0 | 59.39 |
| TIGR00622       | 1 | 6 0 0   | 0 0 | 1 0 | 0 0 | 1 0 | 1 0 | 51.04 |
| TIGR00971       | 1 | 4 1 1   | 0 0 | 0 0 | 0 0 | 0 0 | 0 0 | 44.5  |
| TIGR00975       | 1 | 13 1 1  | 0 0 | 0 0 | 0 0 | 0 0 | 0 0 | 29.4  |
| TIGR01129       | 1 | 9 1 1   | 0 0 | 0 0 | 0 0 | 0 0 | 0 0 | 45.31 |
| TIGR01198       | 1 | 122 0 0 | 0 0 | 0 0 | 0 0 | 0 0 | 1 1 | 27.62 |
| TIGR01256       | 1 | 81 1 1  | 0 0 | 0 0 | 0 0 | 0 0 | 0 0 | 16.17 |
| TIGR01363       | 1 | 3 1 1   | 0 0 | 0 0 | 0 0 | 0 0 | 0 0 | 49.07 |
| TIGR01396       | 1 | 66 0 0  | 0 0 | 0 0 | 0 0 | 0 0 | 0 0 | 26.02 |
| TIGR01447       | 1 | 9 1 1   | 0 0 | 0 0 | 0 0 | 0 0 | 0 0 | 43.65 |
| TIGR01526       | 1 | 61 1 1  | 0 0 | 0 0 | 0 0 | 0 0 | 0 0 | 89.64 |
| TIGR01565       | 1 | 78 0 0  | 0 0 | 1 1 | 0 0 | 0 0 | 0 0 | 64.76 |
| TIGR01603       | 1 | 58 1 1  | 0 0 | 0 0 | 0 0 | 0 0 | 0 0 | 19.05 |
| TIGR01658       | 1 | 5 0 0   | 0 0 | 1 1 | 0 0 | 0 0 | 0 0 | 67.87 |
| TIGR01716       | 1 | 151 1 1 | 0 0 | 0 0 | 0 0 | 0 0 | 0 0 | 12.69 |
| TIGR02059       | 1 | 57 1 1  | 0 0 | 0 0 | 0 0 | 0 0 | 0 0 | 47.56 |
| TIGR02229       | 1 | 46 1 1  | 0 0 | 0 0 | 0 0 | 0 0 | 0 0 | 28.41 |

|           |   |          |     |     |     |     |     |       |
|-----------|---|----------|-----|-----|-----|-----|-----|-------|
| TIGR02320 | 1 | 22 1 1   | 0 0 | 0 0 | 0 0 | 0 0 | 0 0 | 45.36 |
| TIGR02433 | 1 | 17 1 1   | 0 0 | 0 0 | 0 0 | 0 0 | 0 0 | 43.16 |
| TIGR02457 | 1 | 79 1 1   | 0 0 | 0 0 | 0 0 | 0 0 | 0 0 | 30.49 |
| TIGR02469 | 1 | 105 1 1  | 0 0 | 0 0 | 0 0 | 0 0 | 0 0 | 53.23 |
| TIGR02487 | 1 | 153 1 0  | 1 0 | 0 0 | 0 0 | 0 0 | 0 0 | 38.97 |
| TIGR02511 | 1 | 5 1 1    | 0 0 | 0 0 | 0 0 | 0 0 | 0 0 | 48.97 |
| TIGR02578 | 1 | 23 1 1   | 0 0 | 0 0 | 0 0 | 0 0 | 0 0 | 21.88 |
| TIGR02637 | 1 | 10 1 1   | 0 0 | 0 0 | 0 0 | 0 0 | 0 0 | 53.75 |
| TIGR02682 | 1 | 13 1 1   | 0 0 | 0 0 | 0 0 | 0 0 | 0 0 | 22.63 |
| TIGR02688 | 1 | 22 1 1   | 0 0 | 0 0 | 0 0 | 0 0 | 0 0 | 35.71 |
| TIGR02739 | 1 | 24 1 1   | 0 0 | 0 0 | 0 0 | 0 0 | 0 0 | 39.9  |
| TIGR02827 | 1 | 10 1 1   | 0 0 | 0 0 | 0 0 | 0 0 | 0 0 | 71.63 |
| TIGR02917 | 1 | 10 1 1   | 0 0 | 0 0 | 0 0 | 0 0 | 0 0 | 15.02 |
| TIGR02936 | 1 | 29 1 1   | 0 0 | 0 0 | 0 0 | 0 0 | 0 0 | 51.7  |
| TIGR02937 | 1 | 46 1 1   | 0 0 | 0 0 | 0 0 | 0 0 | 0 0 | 3.84  |
| TIGR03032 | 1 | 15 1 1   | 0 0 | 0 0 | 0 0 | 0 0 | 0 0 | 41.32 |
| TIGR03068 | 1 | 13 1 1   | 0 0 | 0 0 | 0 0 | 0 0 | 0 0 | 99.54 |
| TIGR03118 | 1 | 14 1 1   | 0 0 | 0 0 | 0 0 | 0 0 | 0 0 | 38.82 |
| TIGR03170 | 1 | 82 1 1   | 0 0 | 0 0 | 0 0 | 0 0 | 0 0 | 14.26 |
| TIGR03277 | 1 | 17 0 0   | 1 1 | 0 0 | 0 0 | 0 0 | 0 0 | 57.93 |
| TIGR03310 | 1 | 26 1 1   | 0 0 | 0 0 | 0 0 | 0 0 | 0 0 | 77.19 |
| TIGR03317 | 1 | 163 1 0  | 0 0 | 0 0 | 0 0 | 0 0 | 1 0 | 43.02 |
| TIGR03436 | 1 | 32 1 1   | 0 0 | 0 0 | 0 0 | 0 0 | 0 0 | 14.56 |
| TIGR03485 | 1 | 8 1 1    | 0 0 | 0 0 | 0 0 | 0 0 | 0 0 | 20.46 |
| TIGR03486 | 1 | 5 1 1    | 0 0 | 0 0 | 0 0 | 0 0 | 0 0 | 23.92 |
| TIGR03491 | 1 | 59 1 1   | 0 0 | 0 0 | 0 0 | 0 0 | 0 0 | 16.15 |
| TIGR03535 | 1 | 54 1 1   | 0 0 | 0 0 | 0 0 | 0 0 | 0 0 | 67.17 |
| TIGR03544 | 1 | 59 2 2   | 0 0 | 0 0 | 0 0 | 0 0 | 0 0 | 35.35 |
| TIGR03545 | 1 | 6 1 1    | 0 0 | 0 0 | 0 0 | 0 0 | 0 0 | 17.77 |
| TIGR03548 | 1 | 6 1 1    | 0 0 | 0 0 | 0 0 | 0 0 | 0 0 | 36.04 |
| TIGR03557 | 1 | 5 1 1    | 0 0 | 0 0 | 0 0 | 0 0 | 0 0 | 37.95 |
| TIGR03590 | 1 | 33 0 0   | 0 0 | 1 1 | 0 0 | 0 0 | 0 0 | 22.76 |
| IPR000013 | 2 | 12 2 2   | 0 0 | 0 0 | 0 0 | 0 0 | 0 0 | 37.13 |
| IPR000090 | 2 | 479 2 2  | 0 0 | 0 0 | 0 0 | 0 0 | 0 0 | 36.14 |
| IPR000100 | 2 | 726 2 2  | 0 0 | 0 0 | 0 0 | 0 0 | 0 0 | 19.29 |
| IPR000118 | 2 | 277 0 0  | 0 0 | 2 2 | 0 0 | 0 0 | 0 0 | 44.54 |
| IPR000128 | 2 | 12 0 0   | 0 0 | 0 0 | 0 0 | 0 0 | 2 2 | 72.9  |
| IPR000136 | 2 | 91 1 1   | 0 0 | 0 0 | 0 0 | 0 0 | 0 0 | 34.73 |
| IPR000146 | 2 | 542 0 0  | 0 0 | 2 2 | 0 0 | 0 0 | 0 0 | 38.56 |
| IPR000177 | 2 | 67 0 0   | 0 0 | 0 0 | 0 0 | 0 0 | 2 2 | 33.16 |
| IPR000193 | 2 | 329 2 2  | 0 0 | 0 0 | 0 0 | 0 0 | 0 0 | 52.43 |
| IPR000196 | 2 | 158 0 0  | 0 0 | 0 0 | 0 0 | 2 2 | 0 0 | 51.64 |
| IPR000214 | 2 | 134 2 0  | 0 0 | 0 0 | 0 0 | 0 0 | 2 0 | 41.26 |
| IPR000218 | 2 | 1001 0 0 | 0 0 | 2 2 | 0 0 | 1 1 | 0 0 | 50.07 |
| IPR000221 | 2 | 16 0 0   | 0 0 | 1 1 | 0 0 | 0 0 | 1 1 | 43.14 |
| IPR000235 | 2 | 1005 0 0 | 0 0 | 0 0 | 0 0 | 2 2 | 0 0 | 42.41 |
| IPR000293 | 2 | 13 2 2   | 0 0 | 0 0 | 0 0 | 0 0 | 0 0 | 27.49 |
| IPR000396 | 2 | 68 2 2   | 0 0 | 0 0 | 0 0 | 0 0 | 0 0 | 29.08 |
| IPR000407 | 2 | 300 0 0  | 0 0 | 2 2 | 0 0 | 0 0 | 0 0 | 21.46 |
| IPR000412 | 2 | 9 2 2    | 0 0 | 0 0 | 0 0 | 0 0 | 0 0 | 17.14 |
| IPR000420 | 2 | 140 0 0  | 0 0 | 0 0 | 0 0 | 3 3 | 0 0 | 68.30 |
| IPR000440 | 2 | 760 0 0  | 0 0 | 2 2 | 0 0 | 0 0 | 0 0 | 34.56 |
| IPR000479 | 2 | 223 0 0  | 0 0 | 0 0 | 0 0 | 1 1 | 1 1 | 20.07 |
| IPR000484 | 2 | 231 0 0  | 0 0 | 2 2 | 0 0 | 0 0 | 0 0 | 36.96 |
| IPR000527 | 2 | 375 0 0  | 0 0 | 2 2 | 0 0 | 0 0 | 0 0 | 26.65 |
| IPR000533 | 2 | 245 1 1  | 0 0 | 0 0 | 0 0 | 1 1 | 0 0 | 38.73 |
| IPR000559 | 2 | 401 0 0  | 0 0 | 0 0 | 0 0 | 2 0 | 2 0 | 50.46 |
| IPR000587 | 2 | 1338 2 1 | 1 0 | 1 0 | 1 0 | 1 0 | 1 0 | 9.92  |
| IPR000597 | 2 | 1015 0 0 | 0 0 | 2 2 | 0 0 | 0 0 | 0 0 | 36.89 |
| IPR000643 | 2 | 43 2 2   | 0 0 | 0 0 | 0 0 | 0 0 | 0 0 | 23.08 |
| IPR000647 | 2 | 69 0 0   | 0 0 | 0 0 | 0 0 | 2 2 | 0 0 | 57.17 |
| IPR000680 | 2 | 97 2 2   | 0 0 | 0 0 | 0 0 | 0 0 | 0 0 | 32.29 |
| IPR000701 | 2 | 1011 0 0 | 0 0 | 2 2 | 0 0 | 0 0 | 0 0 | 9.44  |
| IPR000704 | 2 | 252 0 0  | 0 0 | 2 2 | 0 0 | 0 0 | 0 0 | 37.35 |
| IPR000710 | 2 | 51 2 2   | 0 0 | 0 0 | 0 0 | 0 0 | 0 0 | 26.59 |
| IPR000718 | 2 | 18 0 0   | 0 0 | 0 0 | 0 0 | 0 0 | 2 2 | 5.34  |
| IPR000724 | 2 | 11 2 2   | 0 0 | 0 0 | 0 0 | 0 0 | 0 0 | 51.52 |
| IPR000731 | 2 | 17 2 2   | 0 0 | 0 0 | 0 0 | 0 0 | 0 0 | 12.14 |
| IPR000754 | 2 | 1000 0 0 | 1 1 | 1 1 | 0 0 | 0 0 | 0 0 | 41.2  |
| IPR000768 | 2 | 61 1 1   | 0 0 | 0 0 | 0 0 | 0 0 | 1 1 | 19.03 |
| IPR000781 | 2 | 63 0 0   | 0 0 | 2 2 | 0 0 | 0 0 | 0 0 | 54.86 |
| IPR000814 | 2 | 519 0 0  | 2 2 | 0 0 | 0 0 | 0 0 | 0 0 | 27.02 |
| IPR000831 | 2 | 233 2 2  | 0 0 | 0 0 | 0 0 | 0 0 | 0 0 | 26.03 |
| IPR000887 | 2 | 687 1 1  | 0 0 | 1 1 | 0 0 | 0 0 | 0 0 | 27.79 |
| IPR000888 | 2 | 708 2 2  | 0 0 | 0 0 | 0 0 | 0 0 | 0 0 | 36.29 |
| IPR000896 | 2 | 154 0 0  | 0 0 | 0 0 | 0 0 | 0 0 | 2 2 | 30.97 |
| IPR000959 | 2 | 173 0 0  | 0 0 | 1 0 | 1 0 | 2 0 | 2 0 | 22.23 |
| IPR000969 | 2 | 81 0 0   | 0 0 | 1 0 | 0 0 | 0 0 | 1 0 | 46.95 |
| IPR000976 | 2 | 16 0 0   | 0 0 | 0 0 | 0 0 | 2 2 | 0 0 | 79.59 |
| IPR001001 | 2 | 862 2 2  | 0 0 | 0 0 | 0 0 | 0 0 | 0 0 | 22.87 |
| IPR001019 | 2 | 596 0 0  | 0 0 | 1 1 | 0 0 | 0 0 | 1 1 | 31.52 |
| IPR001093 | 2 | 482 1 0  | 0 0 | 0 0 | 0 0 | 1 0 | 1 0 | 27.64 |
| IPR001102 | 2 | 105 0 0  | 0 0 | 0 0 | 0 0 | 0 0 | 3 3 | 27.07 |
| IPR001103 | 2 | 22 0 0   | 0 0 | 0 0 | 0 0 | 0 0 | 2 2 | 57.86 |
| IPR001114 | 2 | 927 0 0  | 0 0 | 1 1 | 0 0 | 0 0 | 0 0 | 42.59 |
| IPR001144 | 2 | 15 3 3   | 0 0 | 0 0 | 0 0 | 0 0 | 0 0 | 25.05 |
| IPR001150 | 2 | 841 2 1  | 1 0 | 1 0 | 0 0 | 0 0 | 0 0 | 25.65 |
| IPR001156 | 2 | 255 0 0  | 0 0 | 2 2 | 0 0 | 0 0 | 0 0 | 22.31 |
| IPR001233 | 2 | 470 2 0  | 2 0 | 0 0 | 0 0 | 0 0 | 0 0 | 29.74 |
| IPR001246 | 2 | 1375 1 0 | 1 0 | 1 0 | 0 0 | 1 0 | 2 1 | 27.47 |
| IPR001282 | 2 | 1744 0 0 | 0 0 | 0 0 | 0 0 | 0 0 | 2 1 | 21.52 |
| IPR001293 | 2 | 12 0 0   | 0 0 | 0 0 | 0 0 | 1 1 | 1 1 | 33.22 |
| IPR001297 | 2 | 213 2 2  | 0 0 | 0 0 | 0 0 | 0 0 | 0 0 | 33.88 |
| IPR001312 | 2 | 804 0 0  | 0 0 | 0 0 | 0 0 | 1 1 | 0 0 | 14.52 |
| IPR001338 | 2 | 96 0 0   | 0 0 | 0 0 | 0 0 | 2 2 | 0 0 | 28.01 |
| IPR001340 | 2 | 131 2 2  | 0 0 | 0 0 | 0 0 | 0 0 | 0 0 | 33.26 |
| IPR001346 | 2 | 145 0 0  | 0 0 | 0 0 | 0 0 | 0 0 | 2 2 | 44.76 |
| IPR001383 | 2 | 830 0 0  | 0 0 | 2 2 | 0 0 | 0 0 | 0 0 | 33.28 |
| IPR001389 | 2 | 314 0 0  | 0 0 | 0 0 | 0 0 | 2 2 | 0 0 | 29.56 |
| IPR001393 | 2 | 33 0 0   | 0 0 | 1 1 | 0 0 | 0 0 | 1 1 | 64.96 |
| IPR001409 | 2 | 15 0 0   | 0 0 | 0 0 | 0 0 | 0 0 | 2 2 | 66.22 |
| IPR001465 | 2 | 506 1 0  | 0 0 | 0 0 | 0 0 | 1 0 | 0 0 | 30.43 |
| IPR001501 | 2 | 914 2 0  | 2 0 | 0 0 | 0 0 | 0 0 | 0 0 | 17.77 |
| IPR001534 | 2 | 81 1 1   | 0 0 | 0 0 | 0 0 | 0 0 | 1 1 | 26.64 |
| IPR001539 | 2 | 1183 2 1 | 1 0 | 1 0 | 0 0 | 0 0 | 0 0 | 20.35 |
| IPR001568 | 2 | 328 1 1  | 0 0 | 1 1 | 0 0 | 0 0 | 0 0 | 20.72 |
| IPR001593 | 2 | 179 0 0  | 0 0 | 2 2 | 0 0 | 0 0 | 0 0 | 47.38 |
| IPR001626 | 2 | 1209 2 2 | 0 0 | 0 0 | 0 0 | 0 0 | 0 0 | 23.21 |
| IPR001662 | 2 | 126 0 0  | 0 0 | 2 0 | 2 0 | 2 0 | 3 1 | 42.42 |
| IPR001677 | 2 | 41 2 2   | 0 0 | 0 0 | 0 0 | 0 0 | 0 0 | 21.1  |
| IPR001721 | 2 | 791 1 0  | 0 0 | 2 1 | 0 0 | 1 0 | 0 0 | 27.4  |
| IPR001727 | 2 | 734 0 0  | 0 0 | 2 2 | 0 0 | 0 0 | 0 0 | 26    |
| IPR001731 | 2 | 805 0 0  | 0 0 | 0 0 | 0 0 | 2 2 | 0 0 | 48.12 |
| IPR001769 | 2 | 20 4 4   | 0 0 | 0 0 | 0 0 | 0 0 | 0 0 | 17.32 |
| IPR001809 | 2 | 6 2 2    | 0 0 | 0 0 | 0 0 | 0 0 | 0 0 | 46.9  |
| IPR001839 | 2 | 472 0 0  | 0 0 | 0 0 | 0 0 | 0 0 | 2 2 | 33.82 |
| IPR001854 | 2 | 903 0 0  | 0 0 | 1 0 | 1 0 | 2 0 | 2 0 | 33.83 |
| IPR001855 | 2 | 72 0 0   | 0 0 | 0 0 | 0 0 | 0 0 | 2 2 | 27    |
| IPR001848 | 2 | 299 0 0  | 0 0 | 0 0 | 0 0 | 1 1 | 1 1 | 27.71 |
| IPR001975 | 2 | 140 0 0  | 0 0 | 1 0 | 1 0 | 3 2 | 1 0 | 62.64 |
| IPR001982 | 2 | 61 0 0   | 0 0 | 0 0 | 0 0 | 1 1 | 0 0 | 16.42 |
| IPR001983 | 2 | 113 0 0  | 0 0 | 1 1 | 0 0 | 0 0 | 2 2 | 38.45 |
| IPR001985 | 2 | 132 0 0  | 0 0 | 1 1 | 1 1 | 0 0 | 0 0 | 32.63 |
| IPR001991 | 2 | 1806 1 0 | 1 0 | 0 0 | 0 0 | 0 0 | 1 1 | 24.57 |
| IPR001996 | 2 | 17 2 2   | 0 0 | 0 0 | 0 0 | 0 0 | 0 0 | 19.76 |
| IPR002056 | 2 | 95 0 0   | 0 0 | 0 0 | 0 0 | 1 1 | 0 0 | 32.79 |
| IPR002072 | 2 | 48 1 1   | 0 0 | 0 0 | 0 0 | 0 0 | 1 1 | 61.18 |
| IPR002180 | 2 | 833 1 1  | 0 0 | 1 1 | 0 0 | 0 0 | 0 0 | 35.32 |
| IPR002190 | 2 | 247 0 0  | 0 0 | 0 0 | 0 0 | 1 1 | 1 1 | 25.15 |
| IPR002222 | 2 | 981 0 0  | 0 0 | 2 2 | 0 0 | 0 0 | 0 0 | 49.61 |
| IPR002266 | 2 | 8 0 0    | 0 0 | 0 0 | 0 0 | 0 0 | 2 2 | 64.59 |
| IPR002311 | 2 | 573 2 1  | 0 0 | 1 0 | 0 0 | 0 0 | 0 0 | 33.59 |
| IPR002486 | 2 | 218 0 0  | 0 0 | 0 0 | 0 0 | 0 0 | 2 2 | 18.11 |
| IPR002487 | 2 | 416 0 0  | 0 0 | 3 3 | 0 0 | 0 0 | 0 0 | 22.85 |
| IPR002499 | 2 | 131 0 0  | 0 0 | 0 0 | 1 0 | 0 0 | 2 1 | 18.66 |
| IPR002546 | 2 | 69 0 0   | 0 0 | 0 0 | 0 0 | 0 0 | 2 2 | 38.84 |
| IPR002650 | 2 | 305 1 0  | 0 0 | 0 0 | 1 0 | 1 0 | 0 0 | 29.65 |
| IPR002652 | 2 | 208 0 0  | 0 0 | 1 0 | 1 0 | 1 0 | 2 1 | 29.05 |
| IPR002668 | 2 | 610 2 0  | 0 0 | 0 0 | 0 0 | 2 0 | 2 0 | 27.28 |
| IPR002677 | 2 | 799 0 0  | 0 0 | 0 0 | 0 0 | 2 2 | 0 0 | 30.1  |
| IPR002692 | 2 | 332 2 2  | 0 0 | 0 0 | 0 0 | 0 0 | 0 0 | 16.28 |
| IPR002729 | 2 | 538 2 1  | 1 0 | 0 0 | 0 0 | 0 0 | 0 0 | 14.33 |
| IPR002736 | 2 | 266 1 1  | 0 0 | 1 1 | 0 0 | 0 0 | 0 0 | 18.32 |
| IPR002745 | 2 | 164 0 0  | 0 0 | 0 0 | 1 1 | 1 1 | 0 0 | 27.36 |
| IPR002759 | 2 | 135 0 0  | 0 0 | 1 1 | 0 0 | 0 0 | 1 1 | 16.09 |
| IPR002798 | 2 | 249 1 1  | 1 1 | 0 0 | 0 0 | 0 0 | 0 0 | 13.41 |
|           |   |          |     |     |     |     |     |       |

|           |   |          |     |     |     |     |       |
|-----------|---|----------|-----|-----|-----|-----|-------|
| IPR002804 | 2 | 148 2 2  | 0 0 | 0 0 | 0 0 | 0 0 | 22.18 |
| IPR002813 | 2 | 539 1 1  | 0 0 | 1 1 | 0 0 | 0 0 | 37.18 |
| IPR002815 | 2 | 25 0 0   | 0 0 | 2 2 | 0 0 | 0 0 | 26.52 |
| IPR002816 | 2 | 128 1 1  | 0 0 | 1 1 | 0 0 | 0 0 | 29.01 |
| IPR002817 | 2 | 619 1 1  | 0 0 | 1 1 | 0 0 | 0 0 | 52.66 |
| IPR002825 | 2 | 109 2 1  | 1 0 | 0 0 | 0 0 | 0 0 | 29.77 |
| IPR002829 | 2 | 71 2 2   | 0 0 | 0 0 | 0 0 | 0 0 | 28.83 |
| IPR002834 | 2 | 47 1 1   | 1 1 | 0 0 | 0 0 | 0 0 | 36.37 |
| IPR002842 | 2 | 201 0 0  | 0 0 | 1 1 | 0 0 | 1 1 | 16.91 |
| IPR002843 | 2 | 209 0 0  | 0 0 | 0 0 | 0 0 | 2 2 | 13.48 |
| IPR002848 | 2 | 174 0 0  | 0 0 | 0 0 | 0 0 | 2 2 | 18.58 |
| IPR002852 | 2 | 132 2 2  | 0 0 | 0 0 | 0 0 | 0 0 | 34.14 |
| IPR002905 | 2 | 164 0 0  | 0 0 | 0 0 | 1 1 | 1 1 | 26.1  |
| IPR002910 | 2 | 24 0 0   | 0 0 | 0 0 | 0 0 | 0 0 | 42.12 |
| IPR002995 | 2 | 102 1 1  | 0 0 | 0 0 | 0 0 | 1 1 | 34.74 |
| IPR003038 | 2 | 81 0 0   | 0 0 | 0 0 | 0 0 | 2 2 | 50.28 |
| IPR003102 | 2 | 78 0 0   | 0 0 | 0 0 | 0 0 | 2 2 | 53.26 |
| IPR003120 | 2 | 30 0 0   | 0 0 | 0 0 | 2 2 | 0 0 | 77.51 |
| IPR003127 | 2 | 44 0 0   | 0 0 | 0 0 | 0 0 | 2 2 | 56.34 |
| IPR003134 | 2 | 231 0 0  | 0 0 | 0 0 | 0 0 | 2 2 | 63.22 |
| IPR003163 | 2 | 42 0 0   | 0 0 | 0 0 | 2 2 | 0 0 | 25.75 |
| IPR003164 | 2 | 83 0 0   | 0 0 | 2 0 | 0 0 | 2 0 | 39.26 |
| IPR003187 | 2 | 188 2 2  | 0 0 | 0 0 | 0 0 | 0 0 | 29.44 |
| IPR003191 | 2 | 120 0 0  | 0 0 | 1 0 | 0 0 | 2 1 | 24.03 |
| IPR003192 | 2 | 217 2 2  | 0 0 | 0 0 | 0 0 | 0 0 | 24.2  |
| IPR003226 | 2 | 131 0 0  | 0 0 | 1 1 | 0 0 | 1 1 | 34.06 |
| IPR003302 | 2 | 41 0 0   | 1 1 | 0 0 | 2 2 | 2 2 | 24.71 |
| IPR003315 | 2 | 31 0 0   | 0 0 | 0 0 | 0 0 | 2 2 | 47.65 |
| IPR003327 | 2 | 14 0 0   | 0 0 | 0 0 | 0 0 | 2 2 | 70.58 |
| IPR003345 | 2 | 17 2 2   | 0 0 | 0 0 | 0 0 | 0 0 | 51.75 |
| IPR003377 | 2 | 141 0 0  | 0 0 | 1 1 | 0 0 | 1 1 | 37.85 |
| IPR003416 | 2 | 669 2 2  | 0 0 | 0 0 | 0 0 | 0 0 | 27.71 |
| IPR003422 | 2 | 89 0 0   | 0 0 | 0 0 | 2 2 | 0 0 | 36.54 |
| IPR003428 | 2 | 137 0 0  | 0 0 | 1 1 | 0 0 | 1 1 | 20.09 |
| IPR003458 | 2 | 230 3 3  | 0 0 | 0 0 | 0 0 | 0 0 | 17.8  |
| IPR003475 | 2 | 95 0 0   | 0 0 | 0 0 | 0 0 | 2 2 | 32.9  |
| IPR003481 | 2 | 406 2 0  | 0 0 | 2 0 | 0 0 | 0 0 | 20.23 |
| IPR003491 | 2 | 102 2 2  | 0 0 | 0 0 | 0 0 | 0 0 | 15.14 |
| IPR003534 | 2 | 309 1 1  | 0 0 | 0 0 | 0 0 | 1 1 | 17.56 |
| IPR003543 | 2 | 8 0 0    | 0 0 | 0 0 | 0 0 | 2 2 | 72.52 |
| IPR003578 | 2 | 654 0 0  | 0 0 | 0 0 | 0 0 | 2 2 | 47.52 |
| IPR003605 | 2 | 137 0 0  | 0 0 | 0 0 | 0 0 | 2 2 | 70.28 |
| IPR003652 | 2 | 14 0 0   | 0 0 | 0 0 | 0 0 | 2 2 | 57.56 |
| IPR003669 | 2 | 339 2 2  | 0 0 | 0 0 | 0 0 | 0 0 | 18.46 |
| IPR003691 | 2 | 969 2 2  | 0 0 | 0 0 | 0 0 | 0 0 | 25.18 |
| IPR003695 | 2 | 928 2 1  | 1 0 | 1 0 | 0 0 | 0 0 | 18.51 |
| IPR003719 | 2 | 634 1 1  | 0 0 | 1 1 | 0 0 | 0 0 | 22.9  |
| IPR003745 | 2 | 19 1 1   | 2 2 | 0 0 | 0 0 | 0 0 | 26.06 |
| IPR003748 | 2 | 124 2 2  | 0 0 | 0 0 | 0 0 | 0 0 | 11.84 |
| IPR003762 | 2 | 146 2 2  | 0 0 | 0 0 | 0 0 | 0 0 | 52.54 |
| IPR003773 | 2 | 127 2 2  | 0 0 | 0 0 | 0 0 | 0 0 | 15.88 |
| IPR003793 | 2 | 217 2 2  | 0 0 | 0 0 | 0 0 | 0 0 | 25.16 |
| IPR003829 | 2 | 1091 1 0 | 1 0 | 1 0 | 0 0 | 2 1 | 32.59 |
| IPR003835 | 2 | 492 1 1  | 0 0 | 1 1 | 0 0 | 0 0 | 28.37 |
| IPR003836 | 2 | 344 2 2  | 0 0 | 0 0 | 0 0 | 0 0 | 24.98 |
| IPR003842 | 2 | 105 2 2  | 0 0 | 0 0 | 0 0 | 0 0 | 72.28 |
| IPR003848 | 2 | 1148 3 3 | 0 0 | 0 0 | 0 0 | 0 0 | 12.77 |
| IPR003850 | 2 | 363 2 2  | 0 0 | 0 0 | 0 0 | 0 0 | 35.99 |
| IPR003854 | 2 | 99 0 0   | 0 0 | 2 2 | 0 0 | 0 0 | 39.2  |
| IPR003896 | 2 | 9 2 2    | 0 0 | 0 0 | 0 0 | 0 0 | 53.68 |
| IPR003973 | 2 | 12 0 0   | 0 0 | 0 0 | 0 0 | 2 2 | 54.74 |
| IPR004007 | 2 | 680 2 1  | 0 0 | 1 0 | 1 0 | 1 0 | 21.31 |
| IPR004018 | 2 | 379 0 0  | 0 0 | 0 0 | 0 0 | 2 2 | 36.99 |
| IPR004031 | 2 | 457 0 0  | 0 0 | 0 0 | 0 0 | 2 2 | 20.23 |
| IPR004033 | 2 | 904 0 0  | 0 0 | 1 0 | 0 0 | 2 1 | 25.13 |
| IPR004082 | 2 | 63 0 0   | 0 0 | 2 2 | 0 0 | 0 0 | 27.19 |
| IPR004098 | 2 | 85 0 0   | 0 0 | 2 0 | 1 0 | 2 0 | 44.51 |
| IPR004111 | 2 | 357 2 2  | 0 0 | 0 0 | 0 0 | 0 0 | 10.14 |
| IPR004126 | 2 | 5 0 0    | 0 0 | 0 0 | 0 0 | 1 1 | 57.66 |
| IPR004137 | 2 | 415 2 2  | 0 0 | 0 0 | 0 0 | 0 0 | 30.5  |
| IPR004139 | 2 | 78 0 0   | 0 0 | 0 0 | 0 0 | 2 2 | 39.02 |
| IPR004173 | 2 | 109 1 1  | 1 1 | 0 0 | 0 0 | 0 0 | 40.11 |
| IPR004178 | 2 | 60 0 0   | 0 0 | 0 0 | 2 2 | 0 0 | 65.18 |
| IPR004191 | 2 | 19 1 1   | 0 0 | 0 0 | 0 0 | 1 1 | 53.07 |
| IPR004207 | 2 | 40 0 0   | 0 0 | 1 1 | 0 0 | 0 0 | 51.22 |
| IPR004220 | 2 | 157 0 0  | 0 0 | 2 2 | 0 0 | 0 0 | 29.91 |
| IPR004238 | 2 | 112 1 1  | 0 0 | 0 0 | 0 0 | 1 1 | 31.28 |
| IPR004268 | 2 | 722 1 1  | 0 0 | 1 1 | 0 0 | 0 0 | 18.13 |
| IPR004301 | 2 | 89 0 0   | 0 0 | 1 1 | 0 0 | 1 1 | 28.96 |
| IPR004311 | 2 | 82 2 2   | 0 0 | 0 0 | 0 0 | 0 0 | 38.78 |
| IPR004322 | 2 | 26 2 2   | 0 0 | 0 0 | 0 0 | 0 0 | 30    |
| IPR004323 | 2 | 403 2 2  | 0 0 | 0 0 | 0 0 | 0 0 | 33.92 |
| IPR004333 | 2 | 146 0 0  | 0 0 | 2 2 | 0 0 | 0 0 | 61.54 |
| IPR004335 | 2 | 11 2 2   | 0 0 | 0 0 | 0 0 | 0 0 | 41.47 |
| IPR004338 | 2 | 397 2 2  | 0 0 | 0 0 | 0 0 | 0 0 | 31.77 |
| IPR004347 | 2 | 126 2 2  | 0 0 | 0 0 | 0 0 | 0 0 | 48.16 |
| IPR004353 | 2 | 93 0 0   | 0 0 | 2 2 | 0 0 | 1 1 | 28.45 |
| IPR004378 | 2 | 352 2 2  | 0 0 | 0 0 | 0 0 | 0 0 | 15.11 |
| IPR004394 | 2 | 774 1 1  | 0 0 | 0 0 | 0 0 | 1 1 | 32.87 |
| IPR004474 | 2 | 801 2 2  | 0 0 | 0 0 | 0 0 | 0 0 | 29.75 |
| IPR004564 | 2 | 526 2 2  | 0 0 | 0 0 | 0 0 | 0 0 | 12.27 |
| IPR004595 | 2 | 63 0 0   | 0 0 | 2 0 | 1 0 | 2 0 | 51.46 |
| IPR004619 | 2 | 478 2 2  | 0 0 | 0 0 | 0 0 | 0 0 | 22.54 |
| IPR004623 | 2 | 357 0 0  | 1 0 | 2 1 | 0 0 | 0 0 | 46.89 |
| IPR004647 | 2 | 584 1 0  | 1 0 | 1 0 | 1 0 | 0 0 | 36.68 |
| IPR004686 | 2 | 124 0 0  | 0 0 | 1 1 | 0 0 | 1 1 | 40.92 |
| IPR004753 | 2 | 836 2 2  | 0 0 | 0 0 | 0 0 | 0 0 | 44.45 |
| IPR004861 | 2 | 162 1 1  | 0 0 | 1 1 | 0 0 | 0 0 | 23.12 |
| IPR004872 | 2 | 896 2 2  | 0 0 | 0 0 | 0 0 | 0 0 | 33.87 |
| IPR004884 | 2 | 21 0 0   | 0 0 | 0 0 | 0 0 | 0 0 | 40.52 |
| IPR004896 | 2 | 135 1 1  | 0 0 | 1 1 | 0 0 | 0 0 | 24.63 |
| IPR004907 | 2 | 89 0 0   | 0 0 | 0 0 | 0 0 | 2 2 | 39    |
| IPR004926 | 2 | 41 0 0   | 0 0 | 2 2 | 0 0 | 0 0 | 29.76 |
| IPR004927 | 2 | 39 3 3   | 0 0 | 0 0 | 0 0 | 0 0 | 19.54 |
| IPR004937 | 2 | 118 2 2  | 0 0 | 0 0 | 0 0 | 0 0 | 24.27 |
| IPR004981 | 2 | 170 1 1  | 0 0 | 0 0 | 0 0 | 1 1 | 31.38 |
| IPR005011 | 2 | 85 0 0   | 0 0 | 1 1 | 0 0 | 1 1 | 28.51 |
| IPR005021 | 2 | 276 2 2  | 0 0 | 0 0 | 0 0 | 0 0 | 15.42 |
| IPR005037 | 2 | 123 0 0  | 0 0 | 1 1 | 0 0 | 1 1 | 32.38 |
| IPR005052 | 2 | 179 0 0  | 0 0 | 0 0 | 0 0 | 1 1 | 18.4  |
| IPR005063 | 2 | 501 1 0  | 1 0 | 1 1 | 0 0 | 0 0 | 55.31 |
| IPR005073 | 2 | 146 2 2  | 0 0 | 0 0 | 0 0 | 0 0 | 47.4  |
| IPR005104 | 2 | 183 1 0  | 1 1 | 1 0 | 0 0 | 0 0 | 38.84 |
| IPR005115 | 2 | 1189 1 1 | 0 0 | 0 0 | 0 0 | 0 0 | 23.45 |
| IPR005120 | 2 | 96 0 0   | 0 0 | 0 0 | 0 0 | 1 1 | 29.87 |
| IPR005131 | 2 | 686 2 0  | 1 0 | 1 0 | 0 0 | 1 0 | 34.64 |
| IPR005134 | 2 | 309 0 0  | 0 0 | 2 2 | 0 0 | 0 0 | 25.64 |
| IPR005141 | 2 | 280 1 0  | 2 0 | 2 0 | 2 0 | 2 0 | 17.4  |
| IPR005145 | 2 | 379 2 1  | 1 0 | 0 0 | 1 0 | 1 0 | 24.49 |
| IPR005152 | 2 | 248 1 0  | 0 0 | 0 0 | 1 0 | 0 0 | 14.92 |
| IPR005172 | 2 | 207 0 0  | 0 0 | 2 2 | 0 0 | 0 0 | 53.95 |
| IPR005189 | 2 | 47 0 0   | 0 0 | 0 0 | 0 0 | 2 2 | 52.29 |
| IPR005203 | 2 | 176 0 0  | 0 0 | 0 0 | 0 0 | 2 2 | 30.52 |
| IPR005204 | 2 | 161 0 0  | 0 0 | 0 0 | 0 0 | 2 2 | 26.37 |
| IPR005255 | 2 | 572 2 2  | 0 0 | 0 0 | 0 0 | 0 0 | 33.67 |
| IPR005308 | 2 | 396 2 0  | 0 0 | 2 0 | 0 0 | 0 0 | 15.32 |
| IPR005321 | 2 | 286 2 2  | 0 0 | 0 0 | 0 0 | 0 0 | 28.48 |
| IPR005322 | 2 | 187 2 2  | 0 0 | 0 0 | 0 0 | 0 0 | 26.09 |
| IPR005324 | 2 | 1013 1 0 | 1 0 | 1 0 | 1 0 | 1 0 | 40.01 |
| IPR005329 | 2 | 27 0 0   | 0 0 | 0 0 | 0 0 | 2 2 | 50.88 |
| IPR005336 | 2 | 210 0 0  | 0 0 | 0 0 | 0 0 | 0 0 | 33.69 |
| IPR005337 | 2 | 524 2 2  | 0 0 | 0 0 | 0 0 | 0 0 | 39.56 |
| IPR005359 | 2 | 110 0 0  | 0 0 | 0 0 | 0 0 | 2 2 | 49.91 |
| IPR005494 | 2 | 321 2 1  | 0 0 | 1 0 | 0 0 | 0 0 | 23.42 |
| IPR005498 | 2 | 344 2 2  | 0 0 | 0 0 | 0 0 | 0 0 | 23.34 |
| IPR005506 | 2 | 73 2 2   | 0 0 | 0 0 | 0 0 | 0 0 | 27.3  |
| IPR005526 | 2 | 439 1 1  | 0 0 | 0 0 | 0 0 | 1 1 | 31.35 |
| IPR005528 | 2 | 30 2 2   | 0 0 | 0 0 | 0 0 | 0 0 | 30.48 |
| IPR005530 | 2 | 80 2 2   | 0 0 | 0 0 | 0 0 | 0 0 | 26.92 |
| IPR005537 | 2 | 501 3 3  | 0 0 | 0 0 | 0 0 | 0 0 | 12.86 |
| IPR005549 | 2 | 70 0 0   | 0 0 | 1 1 | 0 0 | 1 1 | 17.36 |
| IPR005600 | 2 | 9 0 0    | 0 0 | 0 0 | 2 2 | 0 0 | 45.3  |
| IPR005612 | 2 | 217 0 0  | 0 0 | 0 0 | 1 0 | 1 0 | 20.8  |
| IPR005614 | 2 | 581 2 2  | 0 0 | 0 0 | 0 0 | 0 0 | 10.42 |
| IPR005619 | 2 | 112 2 2  | 0 0 | 0 0 | 0 0 | 0 0 | 34.37 |
| IPR005632 | 2 | 478 1 1  | 0 0 | 0 0 | 0 0 | 0 0 | 14.17 |
| IPR005635 | 2 | 52 0 0   | 0 0 | 0 0 | 1 1 | 0 0 | 31.21 |

|           |   |          |     |     |     |     |     |       |
|-----------|---|----------|-----|-----|-----|-----|-----|-------|
| IPR005659 | 2 | 290 1 1  | 0 0 | 1 1 | 0 0 | 0 0 | 0 0 | 26.01 |
| IPR005660 | 2 | 661 2 2  | 0 0 | 1 1 | 0 0 | 0 0 | 0 0 | 32.6  |
| IPR005683 | 2 | 67 0 0   | 0 0 | 0 0 | 0 0 | 0 0 | 2 2 | 25.06 |
| IPR005813 | 2 | 823 1 1  | 0 0 | 1 1 | 0 0 | 0 0 | 0 0 | 50.06 |
| IPR005850 | 2 | 363 1 0  | 1 0 | 1 0 | 0 0 | 2 1 | 1 0 | 22.68 |
| IPR005900 | 2 | 239 1 1  | 0 0 | 0 0 | 0 0 | 1 1 | 0 0 | 23.83 |
| IPR006031 | 2 | 14 0 0   | 0 0 | 0 0 | 0 0 | 2 2 | 0 0 | 90.24 |
| IPR006052 | 2 | 239 0 0  | 0 0 | 0 0 | 0 0 | 0 0 | 2 2 | 13.98 |
| IPR006075 | 2 | 780 2 0  | 1 1 | 2 0 | 1 0 | 2 0 | 2 0 | 44.68 |
| IPR006099 | 2 | 589 2 0  | 0 0 | 0 0 | 0 0 | 0 0 | 2 0 | 31.6  |
| IPR006123 | 2 | 295 2 2  | 0 0 | 0 0 | 0 0 | 0 0 | 0 0 | 27.24 |
| IPR006179 | 2 | 19 2 2   | 0 0 | 0 0 | 0 0 | 0 0 | 0 0 | 14.12 |
| IPR006419 | 2 | 359 1 1  | 0 0 | 0 0 | 0 0 | 0 0 | 0 0 | 18.58 |
| IPR006454 | 2 | 49 0 0   | 2 2 | 0 0 | 0 0 | 0 0 | 0 0 | 13.36 |
| IPR006497 | 2 | 87 2 2   | 0 0 | 0 0 | 0 0 | 0 0 | 2 2 | 30.64 |
| IPR006502 | 2 | 117 0 0  | 0 0 | 2 2 | 0 0 | 0 0 | 0 0 | 31.92 |
| IPR006561 | 2 | 78 0 0   | 0 0 | 0 0 | 0 0 | 0 0 | 2 2 | 41.72 |
| IPR006572 | 2 | 61 0 0   | 0 0 | 0 0 | 0 0 | 2 1 | 1 0 | 42.86 |
| IPR006585 | 2 | 15 0 0   | 0 0 | 0 0 | 0 0 | 0 0 | 2 2 | 66.78 |
| IPR006604 | 2 | 228 0 0  | 0 0 | 0 0 | 0 0 | 0 0 | 3 3 | 26.07 |
| IPR006606 | 2 | 29 0 0   | 0 0 | 0 0 | 0 0 | 2 2 | 2 2 | 55.31 |
| IPR006643 | 2 | 93 0 0   | 0 0 | 0 0 | 0 0 | 0 0 | 2 2 | 53.3  |
| IPR006678 | 2 | 111 0 0  | 1 0 | 1 0 | 0 0 | 1 0 | 2 1 | 16.43 |
| IPR006691 | 2 | 6094 2 1 | 1 0 | 1 0 | 1 0 | 0 0 | 0 0 | 15.21 |
| IPR006712 | 2 | 26 0 0   | 0 0 | 2 2 | 0 0 | 0 0 | 0 0 | 37.31 |
| IPR006716 | 2 | 60 0 0   | 0 0 | 0 0 | 0 0 | 2 2 | 0 0 | 28.9  |
| IPR006718 | 2 | 112 0 0  | 0 0 | 0 0 | 0 0 | 2 2 | 0 0 | 65.45 |
| IPR006719 | 2 | 21 0 0   | 0 0 | 0 0 | 0 0 | 0 0 | 2 2 | 65.95 |
| IPR006720 | 2 | 19 0 0   | 0 0 | 0 0 | 0 0 | 0 0 | 2 2 | 60.07 |
| IPR006722 | 2 | 159 0 0  | 0 0 | 1 1 | 0 0 | 1 1 | 0 0 | 26.89 |
| IPR006745 | 2 | 120 0 0  | 0 0 | 1 1 | 0 0 | 1 1 | 1 1 | 24.38 |
| IPR006748 | 2 | 110 2 2  | 0 0 | 0 0 | 0 0 | 0 0 | 0 0 | 23.86 |
| IPR006762 | 2 | 147 1 1  | 0 0 | 0 0 | 0 0 | 2 1 | 0 0 | 38.66 |
| IPR006808 | 2 | 100 0 0  | 0 0 | 0 0 | 0 0 | 2 2 | 0 0 | 25.39 |
| IPR006816 | 2 | 172 0 0  | 0 0 | 1 1 | 0 0 | 2 1 | 1 0 | 27.09 |
| IPR006837 | 2 | 255 2 2  | 0 0 | 0 0 | 0 0 | 0 0 | 0 0 | 24.17 |
| IPR006846 | 2 | 110 0 0  | 0 0 | 0 0 | 0 0 | 1 1 | 1 1 | 58.45 |
| IPR006862 | 2 | 70 2 1   | 0 0 | 1 0 | 0 0 | 1 0 | 0 0 | 32.7  |
| IPR006933 | 2 | 45 0 0   | 0 0 | 1 1 | 0 0 | 0 0 | 1 1 | 38    |
| IPR006955 | 2 | 60 0 0   | 0 0 | 1 0 | 0 0 | 2 1 | 1 0 | 19.98 |
| IPR006964 | 2 | 65 0 0   | 0 0 | 0 0 | 0 0 | 0 0 | 2 2 | 29.18 |
| IPR006986 | 2 | 11 0 0   | 0 0 | 0 0 | 0 0 | 0 0 | 2 2 | 71.74 |
| IPR006988 | 2 | 39 0 0   | 0 0 | 0 0 | 0 0 | 0 0 | 2 2 | 77.5  |
| IPR006998 | 2 | 115 2 2  | 0 0 | 0 0 | 0 0 | 0 0 | 0 0 | 42.46 |
| IPR006999 | 2 | 105 2 2  | 0 0 | 0 0 | 0 0 | 0 0 | 0 0 | 39.96 |
| IPR007001 | 2 | 55 2 2   | 0 0 | 0 0 | 0 0 | 0 0 | 0 0 | 27.78 |
| IPR007002 | 2 | 110 2 2  | 0 0 | 0 0 | 0 0 | 0 0 | 0 0 | 27.51 |
| IPR007003 | 2 | 46 2 2   | 0 0 | 0 0 | 0 0 | 0 0 | 0 0 | 41.64 |
| IPR007009 | 2 | 42 0 0   | 0 0 | 1 0 | 1 0 | 1 1 | 0 0 | 26.19 |
| IPR007042 | 2 | 78 0 0   | 0 0 | 0 0 | 0 0 | 1 0 | 1 0 | 26.28 |
| IPR007044 | 2 | 132 2 0  | 0 0 | 0 0 | 0 0 | 0 0 | 2 0 | 28.6  |
| IPR007046 | 2 | 516 2 1  | 0 0 | 0 0 | 0 0 | 0 0 | 1 0 | 25.7  |
| IPR007048 | 2 | 519 1 0  | 0 0 | 2 1 | 0 0 | 0 0 | 0 0 | 10.81 |
| IPR007049 | 2 | 418 2 2  | 0 0 | 0 0 | 0 0 | 0 0 | 0 0 | 8.48  |
| IPR007060 | 2 | 785 1 1  | 0 0 | 0 0 | 1 1 | 0 0 | 0 0 | 9.89  |
| IPR007061 | 2 | 277 2 2  | 0 0 | 0 0 | 0 0 | 0 0 | 0 0 | 12.81 |
| IPR007062 | 2 | 118 0 0  | 0 0 | 2 2 | 0 0 | 0 0 | 0 0 | 25.29 |
| IPR007065 | 2 | 302 1 1  | 1 1 | 0 0 | 0 0 | 0 0 | 0 0 | 29.81 |
| IPR007072 | 2 | 108 1 1  | 0 0 | 0 0 | 0 0 | 0 0 | 1 1 | 19.31 |
| IPR007077 | 2 | 159 2 2  | 0 0 | 0 0 | 0 0 | 0 0 | 0 0 | 29.86 |
| IPR007112 | 2 | 7 0 0    | 0 0 | 0 0 | 0 0 | 2 2 | 0 0 | 49.91 |
| IPR007134 | 2 | 72 0 0   | 0 0 | 1 0 | 2 0 | 2 0 | 2 0 | 38.86 |
| IPR007135 | 2 | 130 0 0  | 0 0 | 2 0 | 2 0 | 2 0 | 2 0 | 34.15 |
| IPR007146 | 2 | 199 0 0  | 0 0 | 2 1 | 1 0 | 1 0 | 1 0 | 14.97 |
| IPR007150 | 2 | 78 0 0   | 0 0 | 0 0 | 0 0 | 1 1 | 1 1 | 21.79 |
| IPR007155 | 2 | 50 0 0   | 2 2 | 0 0 | 0 0 | 0 0 | 0 0 | 28.32 |
| IPR007157 | 2 | 525 2 2  | 0 0 | 0 0 | 0 0 | 0 0 | 0 0 | 18.24 |
| IPR007174 | 2 | 80 0 0   | 0 0 | 0 0 | 0 0 | 1 1 | 0 0 | 28.26 |
| IPR007175 | 2 | 126 0 0  | 0 0 | 0 0 | 0 0 | 0 0 | 1 1 | 18.64 |
| IPR007182 | 2 | 388 2 2  | 0 0 | 0 0 | 0 0 | 0 0 | 0 0 | 22.88 |
| IPR007196 | 2 | 116 0 0  | 0 0 | 0 0 | 0 0 | 1 1 | 1 1 | 36.18 |
| IPR007206 | 2 | 70 0 0   | 0 0 | 1 0 | 0 0 | 2 1 | 1 0 | 30.79 |
| IPR007216 | 2 | 119 0 0  | 0 0 | 0 0 | 0 0 | 0 0 | 2 2 | 53.97 |
| IPR007218 | 2 | 48 0 0   | 0 0 | 0 0 | 0 0 | 2 2 | 0 0 | 33.44 |
| IPR007223 | 2 | 52 0 0   | 0 0 | 0 0 | 0 0 | 1 0 | 2 1 | 39.32 |
| IPR007233 | 2 | 161 0 0  | 0 0 | 0 0 | 0 0 | 0 0 | 1 1 | 31.67 |
| IPR007249 | 2 | 69 0 0   | 0 0 | 0 0 | 0 0 | 1 1 | 3 3 | 33.65 |
| IPR007268 | 2 | 89 0 0   | 0 0 | 1 1 | 0 0 | 0 0 | 1 1 | 22.08 |
| IPR007271 | 2 | 254 0 0  | 0 0 | 0 0 | 0 0 | 1 1 | 0 0 | 20.89 |
| IPR007274 | 2 | 258 0 0  | 0 0 | 0 0 | 0 0 | 2 2 | 0 0 | 16.34 |
| IPR007293 | 2 | 94 2 2   | 0 0 | 0 0 | 0 0 | 0 0 | 0 0 | 26.53 |
| IPR007295 | 2 | 260 0 0  | 2 2 | 0 0 | 0 0 | 0 0 | 0 0 | 15.18 |
| IPR007296 | 2 | 383 2 2  | 0 0 | 0 0 | 0 0 | 0 0 | 0 0 | 19.42 |
| IPR007298 | 2 | 126 2 2  | 0 0 | 0 0 | 0 0 | 0 0 | 0 0 | 37.08 |
| IPR007300 | 2 | 510 0 0  | 0 0 | 0 0 | 0 0 | 0 0 | 0 0 | 30.56 |
| IPR007311 | 2 | 67 1 1   | 0 0 | 0 0 | 0 0 | 0 0 | 1 1 | 60.06 |
| IPR007340 | 2 | 183 2 2  | 0 0 | 0 0 | 0 0 | 0 0 | 0 0 | 27.47 |
| IPR007344 | 2 | 281 2 1  | 0 0 | 0 0 | 0 0 | 1 0 | 0 0 | 22.52 |
| IPR007361 | 2 | 316 2 2  | 0 0 | 0 0 | 0 0 | 0 0 | 0 0 | 30.94 |
| IPR007369 | 2 | 18 0 0   | 0 0 | 3 1 | 0 0 | 0 0 | 2 0 | 11.47 |
| IPR007393 | 2 | 367 2 2  | 0 0 | 0 0 | 0 0 | 0 0 | 0 0 | 26.03 |
| IPR007397 | 2 | 56 0 0   | 0 0 | 0 0 | 0 0 | 0 0 | 2 2 | 38.21 |
| IPR007404 | 2 | 542 1 1  | 1 1 | 0 0 | 0 0 | 0 0 | 0 0 | 23.95 |
| IPR007410 | 2 | 345 2 2  | 0 0 | 0 0 | 0 0 | 0 0 | 0 0 | 27.38 |
| IPR007432 | 2 | 172 2 2  | 0 0 | 0 0 | 0 0 | 0 0 | 0 0 | 53.63 |
| IPR007436 | 2 | 344 1 1  | 0 0 | 1 1 | 0 0 | 0 0 | 0 0 | 22.82 |
| IPR007438 | 2 | 442 3 3  | 0 0 | 0 0 | 0 0 | 0 0 | 0 0 | 18.7  |
| IPR007443 | 2 | 226 2 2  | 0 0 | 0 0 | 0 0 | 0 0 | 0 0 | 15.64 |
| IPR007452 | 2 | 502 2 2  | 0 0 | 0 0 | 0 0 | 0 0 | 0 0 | 9.12  |
| IPR007455 | 2 | 8 0 0    | 0 0 | 0 0 | 0 0 | 0 0 | 0 0 | 30.45 |
| IPR007466 | 2 | 316 0 0  | 1 1 | 0 0 | 0 0 | 1 1 | 0 0 | 30.68 |
| IPR007471 | 2 | 297 1 0  | 0 0 | 0 0 | 0 0 | 1 0 | 0 0 | 29.5  |
| IPR007489 | 2 | 54 2 2   | 0 0 | 0 0 | 0 0 | 0 0 | 0 0 | 45.72 |
| IPR007504 | 2 | 109 0 0  | 0 0 | 0 0 | 0 0 | 1 1 | 0 0 | 29.72 |
| IPR007511 | 2 | 88 2 2   | 0 0 | 0 0 | 0 0 | 0 0 | 0 0 | 44.75 |
| IPR007514 | 2 | 73 0 0   | 0 0 | 2 2 | 0 0 | 0 0 | 1 1 | 20.96 |
| IPR007537 | 2 | 116 0 0  | 0 0 | 1 1 | 0 0 | 1 1 | 0 0 | 36.73 |
| IPR007543 | 2 | 385 2 2  | 0 0 | 0 0 | 0 0 | 0 0 | 0 0 | 11.64 |
| IPR007583 | 2 | 126 0 0  | 0 0 | 0 0 | 0 0 | 1 1 | 0 0 | 33.68 |
| IPR007593 | 2 | 121 2 2  | 0 0 | 0 0 | 0 0 | 0 0 | 0 0 | 21.41 |
| IPR007594 | 2 | 70 0 0   | 0 0 | 0 0 | 0 0 | 1 1 | 0 0 | 22.33 |
| IPR007598 | 2 | 27 0 0   | 0 0 | 2 2 | 0 0 | 0 0 | 0 0 | 29.98 |
| IPR007604 | 2 | 110 0 0  | 0 0 | 0 0 | 0 0 | 0 0 | 2 2 | 32.71 |
| IPR007608 | 2 | 102 0 0  | 0 0 | 2 2 | 0 0 | 0 0 | 0 0 | 30.41 |
| IPR007613 | 2 | 43 0 0   | 0 0 | 3 3 | 0 0 | 0 0 | 0 0 | 25.71 |
| IPR007654 | 2 | 24 0 0   | 0 0 | 0 0 | 0 0 | 2 2 | 0 0 | 46.85 |
| IPR007657 | 2 | 150 0 0  | 0 0 | 2 2 | 0 0 | 0 0 | 1 1 | 23.46 |
| IPR007667 | 2 | 223 0 0  | 0 0 | 1 1 | 0 0 | 0 0 | 1 1 | 19.91 |
| IPR007679 | 2 | 87 0 0   | 0 0 | 2 2 | 0 0 | 0 0 | 0 0 | 34.33 |
| IPR007681 | 2 | 48 0 0   | 0 0 | 0 0 | 0 0 | 2 2 | 0 0 | 30.12 |
| IPR007684 | 2 | 142 2 2  | 0 0 | 0 0 | 0 0 | 0 0 | 0 0 | 29.69 |
| IPR007690 | 2 | 225 3 3  | 0 0 | 0 0 | 0 0 | 0 0 | 0 0 | 10.09 |
| IPR007708 | 2 | 72 0 0   | 0 0 | 2 1 | 1 0 | 1 0 | 1 0 | 27.7  |
| IPR007710 | 2 | 197 1 0  | 2 1 | 0 0 | 0 0 | 0 0 | 0 0 | 14.31 |
| IPR007750 | 2 | 105 0 0  | 0 0 | 2 2 | 0 0 | 0 0 | 0 0 | 24.52 |
| IPR007763 | 2 | 223 0 0  | 0 0 | 0 0 | 0 0 | 2 2 | 0 0 | 26.64 |
| IPR007770 | 2 | 95 0 0   | 0 0 | 2 2 | 0 0 | 0 0 | 0 0 | 40.06 |
| IPR007774 | 2 | 50 2 2   | 0 0 | 0 0 | 0 0 | 0 0 | 0 0 | 40.49 |
| IPR007780 | 2 | 282 2 1  | 0 0 | 0 0 | 1 0 | 1 0 | 0 0 | 32.74 |
| IPR007792 | 2 | 212 2 2  | 0 0 | 0 0 | 0 0 | 0 0 | 0 0 | 15.45 |
| IPR007793 | 2 | 418 3 3  | 0 0 | 0 0 | 0 0 | 0 0 | 0 0 | 20.32 |
| IPR007794 | 2 | 13 0 0   | 0 0 | 0 0 | 0 0 | 0 0 | 2 2 | 53.42 |
| IPR007797 | 2 | 56 0 0   | 0 0 | 0 0 | 0 0 | 0 0 | 1 1 | 28.91 |
| IPR007811 | 2 | 82 0 0   | 0 0 | 0 0 | 0 0 | 0 0 | 2 2 | 23.9  |
| IPR007823 | 2 | 74 0 0   | 0 0 | 0 0 | 0 0 | 0 0 | 2 2 | 43.24 |
| IPR007836 | 2 | 32 0 0   | 0 0 | 1 1 | 0 0 | 0 0 | 0 0 | 88.96 |
| IPR007857 | 2 | 177 0 0  | 0 0 | 0 0 | 0 0 | 2 2 | 0 0 | 21.84 |
| IPR007873 | 2 | 76 0 0   | 0 0 | 1 1 | 0 0 | 1 1 | 0 0 | 44.57 |
| IPR007888 | 2 | 82 0 0   | 0 0 | 0 0 | 0 0 | 0 0 | 2 2 | 28.91 |
| IPR007900 | 2 | 94 0 0   | 0 0 | 1 1 | 0 0 | 0 0 | 1 1 | 17.02 |
| IPR007922 | 2 | 455 2 2  | 0 0 | 0 0 | 0 0 | 0 0 | 0 0 | 12.02 |
| IPR007926 | 2 | 18 1 1   | 0 0 | 0 0 | 0 0 | 1 1 | 0 0 | 14.72 |
| IPR007931 | 2 | 140 0 0  | 0 0 | 0 0 | 0 0 | 0 0 | 2 2 | 21.25 |
| IPR007972 | 2 | 34 0 0   | 0 0 | 0 0 | 0 0 | 0 0 | 0 0 | 30    |
| IPR007981 | 2 | 35 0 0   | 2 2 | 0 0 | 0 0 | 0 0 | 0 0 | 31.12 |
| IPR008000 | 2 | 215 2 2  | 0 0 | 0 0 | 0 0 | 0   |     |       |

|           |   |          |     |     |     |     |     |       |
|-----------|---|----------|-----|-----|-----|-----|-----|-------|
| IPR008201 | 2 | 411 2 1  | 1 0 | 0 0 | 0 0 | 0 0 | 0 0 | 14    |
| IPR008300 | 2 | 259 2 2  | 0 0 | 0 0 | 0 0 | 0 0 | 0 0 | 29.91 |
| IPR008336 | 2 | 87 0 0   | 1 0 | 1 0 | 1 0 | 1 0 | 2 1 | 55.32 |
| IPR008383 | 2 | 58 0 0   | 0 0 | 2 2 | 0 0 | 0 0 | 1 1 | 31.94 |
| IPR008384 | 2 | 83 0 0   | 0 0 | 2 2 | 0 0 | 0 0 | 0 0 | 70.67 |
| IPR008388 | 2 | 27 0 0   | 0 0 | 0 0 | 0 0 | 1 1 | 1 1 | 32.42 |
| IPR008399 | 2 | 14 0 0   | 0 0 | 0 0 | 0 0 | 0 0 | 2 2 | 68.6  |
| IPR008400 | 2 | 20 0 0   | 0 0 | 0 0 | 0 0 | 0 0 | 2 2 | 54.16 |
| IPR008417 | 2 | 145 0 0  | 0 0 | 0 0 | 0 0 | 1 1 | 0 0 | 20.14 |
| IPR008427 | 2 | 147 0 0  | 0 0 | 0 0 | 0 0 | 3 3 | 0 0 | 24.75 |
| IPR008429 | 2 | 110 0 0  | 0 0 | 1 1 | 0 0 | 1 1 | 0 0 | 39.36 |
| IPR008491 | 2 | 43 0 0   | 0 0 | 0 0 | 0 0 | 0 0 | 2 2 | 37.29 |
| IPR008509 | 2 | 55 0 0   | 0 0 | 1 1 | 0 0 | 1 1 | 0 0 | 37.76 |
| IPR008545 | 2 | 117 0 0  | 0 0 | 2 2 | 0 0 | 0 0 | 0 0 | 20.75 |
| IPR008551 | 2 | 249 0 0  | 0 0 | 1 1 | 0 0 | 1 1 | 0 0 | 25.12 |
| IPR008571 | 2 | 261 1 0  | 2 1 | 0 0 | 0 0 | 0 0 | 0 0 | 41.94 |
| IPR008590 | 2 | 76 0 0   | 0 0 | 0 0 | 0 0 | 0 0 | 2 2 | 23.98 |
| IPR008594 | 2 | 69 0 0   | 0 0 | 0 0 | 0 0 | 2 2 | 0 0 | 36.35 |
| IPR008595 | 2 | 39 2 2   | 0 0 | 0 0 | 0 0 | 0 0 | 0 0 | 31.15 |
| IPR008599 | 2 | 182 2 2  | 0 0 | 0 0 | 0 0 | 0 0 | 0 0 | 32.58 |
| IPR008610 | 2 | 80 0 0   | 0 0 | 0 0 | 0 0 | 2 2 | 0 0 | 31.13 |
| IPR008614 | 2 | 32 0 0   | 0 0 | 0 0 | 0 0 | 0 0 | 2 2 | 57.95 |
| IPR008656 | 2 | 67 0 0   | 0 0 | 2 2 | 0 0 | 0 0 | 0 0 | 32.49 |
| IPR008664 | 2 | 21 0 0   | 0 0 | 0 0 | 0 0 | 0 0 | 2 2 | 79.89 |
| IPR008669 | 2 | 32 0 0   | 0 0 | 2 0 | 0 0 | 1 0 | 2 0 | 48.9  |
| IPR008670 | 2 | 60 2 1   | 1 0 | 0 0 | 0 0 | 0 0 | 0 0 | 11.55 |
| IPR008688 | 2 | 85 0 0   | 0 0 | 1 1 | 0 0 | 1 1 | 0 0 | 23.36 |
| IPR008698 | 2 | 62 0 0   | 0 0 | 0 0 | 0 0 | 1 1 | 1 1 | 46.37 |
| IPR008719 | 2 | 188 1 1  | 1 1 | 0 0 | 0 0 | 0 0 | 0 0 | 17.55 |
| IPR008722 | 2 | 59 2 2   | 0 0 | 0 0 | 0 0 | 0 0 | 0 0 | 18.23 |
| IPR008752 | 2 | 44 2 2   | 0 0 | 0 0 | 0 0 | 0 0 | 0 0 | 17.68 |
| IPR008766 | 2 | 91 2 2   | 0 0 | 0 0 | 0 0 | 0 0 | 0 0 | 39.48 |
| IPR008769 | 2 | 78 2 2   | 0 0 | 0 0 | 0 0 | 2 0 | 0 0 | 29.6  |
| IPR008806 | 2 | 77 0 0   | 0 0 | 1 0 | 0 0 | 2 1 | 1 0 | 17.6  |
| IPR008807 | 2 | 321 2 2  | 1 1 | 0 0 | 0 0 | 0 0 | 0 0 | 36.65 |
| IPR008813 | 2 | 34 2 2   | 0 0 | 0 0 | 0 0 | 0 0 | 0 0 | 17.41 |
| IPR008832 | 2 | 79 0 0   | 0 0 | 0 0 | 0 0 | 2 2 | 0 0 | 30.11 |
| IPR008856 | 2 | 63 0 0   | 0 0 | 2 2 | 0 0 | 0 0 | 0 0 | 29.42 |
| IPR008862 | 2 | 139 0 0  | 0 0 | 1 1 | 0 0 | 0 0 | 0 0 | 16.58 |
| IPR008868 | 2 | 106 2 2  | 0 0 | 0 0 | 0 0 | 0 0 | 0 0 | 16.49 |
| IPR008894 | 2 | 86 2 2   | 0 0 | 0 0 | 0 0 | 0 0 | 0 0 | 23.62 |
| IPR008895 | 2 | 69 0 0   | 0 0 | 1 0 | 1 0 | 1 0 | 2 1 | 26.98 |
| IPR008899 | 2 | 16 0 0   | 0 0 | 0 0 | 0 0 | 0 0 | 3 3 | 66.42 |
| IPR008907 | 2 | 60 0 0   | 0 0 | 1 1 | 0 0 | 1 1 | 0 0 | 30.46 |
| IPR008912 | 2 | 412 2 2  | 0 0 | 0 0 | 0 0 | 0 0 | 0 0 | 14.65 |
| IPR009073 | 2 | 299 1 0  | 0 0 | 1 0 | 1 0 | 1 0 | 2 1 | 18.85 |
| IPR009087 | 2 | 10 0 0   | 0 0 | 0 0 | 0 0 | 0 0 | 2 2 | 72.7  |
| IPR009244 | 2 | 70 0 0   | 0 0 | 0 0 | 0 0 | 0 0 | 2 2 | 39.17 |
| IPR009271 | 2 | 85 0 0   | 0 0 | 0 0 | 0 0 | 0 0 | 2 2 | 65.53 |
| IPR009302 | 2 | 20 3 3   | 0 0 | 0 0 | 0 0 | 0 0 | 0 0 | 62.67 |
| IPR009308 | 2 | 97 2 2   | 0 0 | 0 0 | 0 0 | 0 0 | 0 0 | 58.76 |
| IPR009327 | 2 | 261 2 2  | 0 0 | 0 0 | 0 0 | 0 0 | 0 0 | 34.55 |
| IPR009349 | 2 | 76 0 0   | 0 0 | 0 0 | 1 0 | 1 1 | 1 0 | 44.41 |
| IPR009464 | 2 | 34 0 0   | 0 0 | 0 0 | 0 0 | 0 0 | 2 2 | 56.05 |
| IPR009500 | 2 | 20 0 0   | 0 0 | 2 2 | 0 0 | 0 0 | 0 0 | 47.88 |
| IPR009571 | 2 | 166 0 0  | 0 0 | 0 0 | 0 0 | 2 2 | 0 0 | 10.07 |
| IPR009594 | 2 | 378 2 1  | 0 0 | 1 0 | 0 0 | 0 0 | 0 0 | 23.89 |
| IPR009600 | 2 | 77 0 0   | 0 0 | 0 0 | 0 0 | 0 0 | 2 2 | 36.7  |
| IPR009604 | 2 | 76 0 0   | 0 0 | 2 1 | 0 0 | 0 0 | 1 0 | 44.91 |
| IPR009606 | 2 | 143 0 0  | 0 0 | 3 3 | 0 0 | 0 0 | 0 0 | 21.86 |
| IPR009610 | 2 | 67 2 2   | 0 0 | 0 0 | 0 0 | 0 0 | 0 0 | 64.36 |
| IPR009614 | 2 | 213 2 2  | 0 0 | 0 0 | 0 0 | 2 0 | 0 0 | 36.79 |
| IPR009635 | 2 | 35 0 0   | 0 0 | 0 0 | 0 0 | 0 0 | 2 2 | 39.48 |
| IPR009642 | 2 | 145 2 2  | 0 0 | 0 0 | 0 0 | 0 0 | 0 0 | 32.68 |
| IPR009651 | 2 | 151 0 0  | 0 0 | 2 2 | 0 0 | 0 0 | 0 0 | 51.1  |
| IPR009662 | 2 | 96 2 2   | 0 0 | 0 0 | 0 0 | 0 0 | 0 0 | 35.97 |
| IPR009677 | 2 | 96 2 2   | 0 0 | 0 0 | 0 0 | 0 0 | 0 0 | 26.37 |
| IPR009678 | 2 | 71 0 0   | 0 0 | 2 2 | 0 0 | 0 0 | 0 0 | 33.21 |
| IPR009679 | 2 | 48 2 2   | 0 0 | 0 0 | 0 0 | 0 0 | 0 0 | 22.92 |
| IPR009767 | 2 | 21 2 2   | 0 0 | 0 0 | 0 0 | 0 0 | 0 0 | 65.24 |
| IPR009825 | 2 | 438 2 2  | 0 0 | 0 0 | 0 0 | 0 0 | 0 0 | 9.03  |
| IPR009849 | 2 | 113 2 2  | 0 0 | 0 0 | 0 0 | 0 0 | 0 0 | 13.42 |
| IPR009886 | 2 | 207 0 0  | 0 0 | 0 0 | 0 0 | 1 1 | 0 0 | 6.54  |
| IPR009908 | 2 | 128 2 2  | 0 0 | 0 0 | 0 0 | 0 0 | 0 0 | 13.57 |
| IPR009909 | 2 | 32 0 0   | 0 0 | 0 0 | 0 0 | 0 0 | 2 2 | 36.99 |
| IPR009938 | 2 | 15 0 0   | 0 0 | 1 1 | 0 0 | 0 0 | 1 1 | 43.76 |
| IPR009955 | 2 | 13 0 0   | 0 0 | 0 0 | 0 0 | 0 0 | 2 2 | 61.03 |
| IPR009961 | 2 | 96 0 0   | 0 0 | 0 0 | 0 0 | 0 0 | 2 2 | 34.96 |
| IPR010003 | 2 | 25 0 0   | 0 0 | 0 0 | 0 0 | 2 2 | 0 0 | 44.62 |
| IPR010181 | 2 | 165 2 2  | 0 0 | 0 0 | 0 0 | 0 0 | 0 0 | 18.99 |
| IPR010258 | 2 | 361 2 2  | 0 0 | 0 0 | 0 0 | 0 0 | 0 0 | 20.55 |
| IPR010261 | 2 | 155 0 0  | 0 0 | 0 0 | 2 2 | 0 0 | 0 0 | 7.32  |
| IPR010275 | 2 | 222 2 2  | 0 0 | 0 0 | 0 0 | 0 0 | 0 0 | 36.36 |
| IPR010282 | 2 | 166 2 2  | 0 0 | 0 0 | 0 0 | 0 0 | 0 0 | 26.43 |
| IPR010305 | 2 | 185 2 2  | 0 0 | 0 0 | 0 0 | 0 0 | 0 0 | 46.14 |
| IPR010318 | 2 | 135 0 0  | 0 0 | 0 0 | 0 0 | 2 2 | 0 0 | 25.29 |
| IPR010328 | 2 | 54 2 2   | 0 0 | 0 0 | 0 0 | 0 0 | 0 0 | 22.81 |
| IPR010339 | 2 | 27 0 0   | 0 0 | 1 1 | 0 0 | 1 1 | 0 0 | 21.08 |
| IPR010344 | 2 | 131 2 2  | 0 0 | 0 0 | 0 0 | 0 0 | 0 0 | 35.48 |
| IPR010349 | 2 | 148 0 0  | 0 0 | 0 0 | 0 0 | 2 2 | 0 0 | 30.6  |
| IPR010369 | 2 | 57 0 0   | 0 0 | 2 2 | 0 0 | 0 0 | 0 0 | 28.24 |
| IPR010400 | 2 | 139 0 0  | 0 0 | 0 0 | 0 0 | 1 0 | 2 1 | 36.04 |
| IPR010405 | 2 | 34 0 0   | 0 0 | 0 0 | 0 0 | 0 0 | 2 2 | 49.21 |
| IPR010407 | 2 | 16 0 0   | 0 0 | 0 0 | 0 0 | 0 0 | 2 2 | 63.91 |
| IPR010412 | 2 | 115 2 2  | 0 0 | 0 0 | 0 0 | 0 0 | 0 0 | 23.15 |
| IPR010414 | 2 | 69 1 1   | 0 0 | 1 1 | 0 0 | 0 0 | 0 0 | 33.74 |
| IPR010424 | 2 | 116 0 0  | 1 1 | 0 0 | 0 0 | 1 1 | 0 0 | 37.29 |
| IPR010512 | 2 | 122 0 0  | 0 0 | 0 0 | 0 0 | 0 0 | 2 2 | 27.06 |
| IPR010516 | 2 | 70 0 0   | 0 0 | 0 0 | 0 0 | 2 2 | 0 0 | 44.14 |
| IPR010543 | 2 | 22 0 0   | 0 0 | 2 2 | 0 0 | 0 0 | 0 0 | 53.13 |
| IPR010544 | 2 | 42 0 0   | 0 0 | 2 2 | 0 0 | 0 0 | 0 0 | 34.15 |
| IPR010561 | 2 | 91 0 0   | 0 0 | 2 2 | 0 0 | 0 0 | 0 0 | 39.85 |
| IPR010563 | 2 | 63 2 2   | 0 0 | 0 0 | 0 0 | 0 0 | 0 0 | 10.22 |
| IPR010565 | 2 | 29 0 0   | 0 0 | 0 0 | 0 0 | 1 0 | 2 1 | 63.45 |
| IPR010575 | 2 | 8 2 2    | 0 0 | 0 0 | 0 0 | 0 0 | 0 0 | 53.2  |
| IPR010579 | 2 | 855 0 0  | 0 0 | 0 0 | 0 0 | 0 0 | 2 2 | 71.11 |
| IPR010580 | 2 | 64 0 0   | 0 0 | 2 2 | 0 0 | 0 0 | 0 0 | 46.15 |
| IPR010622 | 2 | 73 0 0   | 0 0 | 0 0 | 0 0 | 2 2 | 0 0 | 19.92 |
| IPR010628 | 2 | 196 2 2  | 0 0 | 0 0 | 0 0 | 0 0 | 0 0 | 60.2  |
| IPR010635 | 2 | 7 1 0    | 0 0 | 2 1 | 0 0 | 0 0 | 0 0 | 32.16 |
| IPR010645 | 2 | 140 2 2  | 0 0 | 0 0 | 0 0 | 0 0 | 0 0 | 35.34 |
| IPR010654 | 2 | 129 2 2  | 0 0 | 0 0 | 0 0 | 0 0 | 0 0 | 44.82 |
| IPR010683 | 2 | 45 0 0   | 0 0 | 2 2 | 0 0 | 0 0 | 0 0 | 40.67 |
| IPR010684 | 2 | 74 0 0   | 0 0 | 0 0 | 0 0 | 2 2 | 0 0 | 22.71 |
| IPR010686 | 2 | 77 0 0   | 0 0 | 0 0 | 0 0 | 0 0 | 0 0 | 44.74 |
| IPR010716 | 2 | 8 0 0    | 0 0 | 0 0 | 0 0 | 0 0 | 2 2 | 79.3  |
| IPR010723 | 2 | 1206 2 1 | 0 0 | 1 0 | 0 0 | 0 0 | 1 0 | 14.34 |
| IPR010760 | 2 | 40 0 0   | 0 0 | 0 0 | 0 0 | 0 0 | 0 0 | 30.29 |
| IPR010768 | 2 | 150 2 1  | 1 0 | 0 0 | 0 0 | 0 0 | 0 0 | 28.35 |
| IPR010787 | 2 | 129 2 2  | 0 0 | 0 0 | 0 0 | 0 0 | 0 0 | 40.36 |
| IPR010791 | 2 | 73 1 1   | 0 0 | 0 0 | 0 0 | 1 1 | 0 0 | 11.03 |
| IPR010800 | 2 | 137 0 0  | 0 0 | 0 0 | 0 0 | 1 1 | 1 1 | 18.56 |
| IPR010809 | 2 | 417 2 0  | 0 0 | 2 0 | 0 0 | 0 0 | 0 0 | 21.81 |
| IPR010812 | 2 | 27 2 2   | 0 0 | 0 0 | 0 0 | 0 0 | 0 0 | 17.95 |
| IPR010821 | 2 | 87 1 1   | 0 0 | 1 1 | 0 0 | 0 0 | 0 0 | 17.52 |
| IPR010828 | 2 | 62 1 1   | 0 0 | 0 0 | 0 0 | 0 0 | 0 0 | 10.4  |
| IPR010844 | 2 | 76 0 0   | 0 0 | 0 0 | 0 0 | 0 0 | 2 2 | 33.11 |
| IPR010856 | 2 | 102 0 0  | 0 0 | 0 0 | 0 0 | 0 0 | 0 0 | 46.97 |
| IPR010879 | 2 | 287 2 2  | 0 0 | 0 0 | 0 0 | 0 0 | 0 0 | 30.58 |
| IPR010889 | 2 | 3 0 0    | 0 0 | 0 0 | 0 0 | 0 0 | 2 2 | 40.39 |
| IPR010891 | 2 | 235 2 2  | 0 0 | 0 0 | 0 0 | 0 0 | 0 0 | 13.68 |
| IPR010941 | 2 | 322 2 0  | 1 0 | 2 0 | 0 0 | 0 0 | 0 0 | 36.4  |
| IPR011087 | 2 | 26 2 2   | 0 0 | 0 0 | 0 0 | 0 0 | 0 0 | 53.24 |
| IPR011090 | 2 | 55 1 1   | 0 0 | 0 0 | 0 0 | 0 0 | 1 1 | 40.54 |
| IPR011099 | 2 | 61 2 0   | 2 0 | 0 0 | 0 0 | 2 0 | 0 0 | 41.41 |
| IPR011100 | 2 | 61 2 0   | 2 0 | 0 0 | 0 0 | 2 0 | 0 0 | 52.48 |
| IPR011104 | 2 | 346 1 0  | 0 0 | 2 1 | 0 0 | 0 0 | 0 0 | 32.51 |
| IPR011126 | 2 | 249 1 0  | 0 0 | 2 1 | 0 0 | 0 0 | 0 0 | 25.41 |
| IPR011418 | 2 | 182 2 1  | 1 0 | 0 0 | 0 0 | 0 0 | 0 0 | 28.13 |
| IPR011419 | 2 | 145 0 0  | 0 0 | 0 0 | 1 1 | 2 2 | 0 0 | 31.09 |
| IPR011420 | 2 | 6 0 0    | 0 0 | 0 0 | 0 0 | 2 2 | 0 0 | 52.92 |
| IPR011434 | 2 | 68 2 2   | 0 0 | 0 0 | 0 0 | 0 0 | 0 0 | 38.77 |
| IPR011488 | 2 | 133 0 0  | 0 0 | 1 0 | 1 0 | 1 0 | 0 0 | 31.25 |
| IPR011520 | 2 | 34 0 0   | 0 0 | 0 0 | 0 0 | 0 0 | 2 2 | 68.06 |
| IPR011531 | 2 | 293 0 0  | 0 0 | 0 0 | 0 0 | 0 0 | 2 2 | 29.1  |
| IPR011618 | 2 | 99 2 2   | 0 0 | 0 0 | 0 0 | 0 0 | 0 0 | 56.43 |
|           |   |          |     |     |     |     |     |       |

|           |   |          |     |     |     |     |       |       |
|-----------|---|----------|-----|-----|-----|-----|-------|-------|
| IPR011678 | 2 | 76 0 0   | 0 0 | 0 0 | 0 0 | 0 0 | 0 0   | 35.83 |
| IPR011680 | 2 | 41 0 0   | 0 0 | 0 0 | 0 0 | 0 0 | 1 1   | 40.62 |
| IPR011681 | 2 | 115 1 1  | 1 1 | 0 0 | 0 0 | 0 0 | 0 0   | 32.39 |
| IPR011685 | 2 | 164 0 0  | 0 0 | 1 0 | 0 0 | 1 0 | 3 2   | 25.02 |
| IPR011686 | 2 | 6 2 2    | 0 0 | 0 0 | 0 0 | 0 0 | 0 0   | 69.28 |
| IPR011871 | 2 | 38 2 2   | 0 0 | 0 0 | 0 0 | 0 0 | 0 0   | 30.21 |
| IPR011996 | 2 | 64 0 0   | 0 0 | 0 0 | 0 0 | 0 0 | 2 2   | 56.18 |
| IPR012128 | 2 | 294 2 2  | 0 0 | 0 0 | 0 0 | 0 0 | 0 0   | 24.08 |
| IPR012250 | 2 | 21 0 0   | 0 0 | 0 0 | 0 0 | 2 2 | 34.42 | 34.42 |
| IPR012318 | 2 | 660 2 2  | 0 0 | 0 0 | 0 0 | 0 0 | 0 0   | 13.41 |
| IPR012413 | 2 | 173 2 2  | 0 0 | 0 0 | 0 0 | 0 0 | 0 0   | 44.23 |
| IPR012416 | 2 | 131 0 0  | 0 0 | 2 2 | 0 0 | 0 0 | 0 0   | 32.89 |
| IPR012429 | 2 | 246 2 1  | 0 0 | 1 0 | 0 0 | 0 0 | 0 0   | 11.83 |
| IPR012438 | 2 | 93 0 0   | 0 0 | 2 2 | 0 0 | 0 0 | 0 0   | 45.96 |
| IPR012464 | 2 | 359 0 0  | 0 0 | 0 0 | 0 0 | 2 2 | 0 0   | 8.9   |
| IPR012466 | 2 | 88 0 0   | 0 0 | 2 2 | 0 0 | 0 0 | 0 0   | 47.37 |
| IPR012472 | 2 | 54 0 0   | 0 0 | 0 0 | 0 0 | 2 2 | 0 0   | 19.36 |
| IPR012479 | 2 | 67 0 0   | 0 0 | 0 0 | 0 0 | 2 2 | 0 0   | 33.96 |
| IPR012506 | 2 | 257 1 1  | 0 0 | 1 1 | 0 0 | 0 0 | 0 0   | 13.85 |
| IPR012511 | 2 | 10 0 0   | 0 0 | 2 2 | 0 0 | 0 0 | 0 0   | 73.89 |
| IPR012523 | 2 | 112 1 1  | 0 0 | 1 1 | 0 0 | 0 0 | 0 0   | 29.25 |
| IPR012542 | 2 | 15 0 0   | 0 0 | 0 0 | 0 0 | 0 0 | 2 2   | 45.46 |
| IPR012556 | 2 | 260 2 2  | 0 0 | 0 0 | 0 0 | 0 0 | 0 0   | 34.94 |
| IPR012572 | 2 | 10 0 0   | 0 0 | 0 0 | 0 0 | 2 2 | 0 0   | 31.35 |
| IPR012580 | 2 | 131 0 0  | 0 0 | 1 0 | 0 0 | 2 1 | 0 0   | 39.5  |
| IPR012587 | 2 | 24 0 0   | 0 0 | 0 0 | 0 0 | 0 0 | 2 2   | 57.82 |
| IPR012588 | 2 | 69 0 0   | 0 0 | 2 0 | 0 0 | 2 0 | 2 2   | 27.36 |
| IPR012606 | 2 | 150 0 0  | 1 0 | 1 0 | 1 0 | 2 1 | 1 0   | 53.7  |
| IPR012613 | 2 | 19 0 0   | 0 0 | 0 0 | 0 0 | 0 0 | 2 2   | 77.04 |
| IPR012642 | 2 | 29 0 0   | 0 0 | 0 0 | 0 0 | 0 0 | 2 2   | 78.26 |
| IPR012654 | 2 | 30 2 2   | 0 0 | 0 0 | 0 0 | 0 0 | 0 0   | 22.13 |
| IPR012660 | 2 | 135 1 0  | 0 0 | 2 1 | 0 0 | 0 0 | 0 0   | 37.33 |
| IPR012682 | 2 | 48 0 0   | 0 0 | 0 0 | 0 0 | 2 0 | 2 2   | 37.32 |
| IPR012849 | 2 | 75 0 0   | 0 0 | 0 0 | 0 0 | 0 0 | 2 2   | 70.68 |
| IPR012856 | 2 | 8 2 0    | 0 0 | 0 0 | 0 0 | 2 0 | 0 0   | 75.29 |
| IPR012857 | 2 | 13 2 0   | 0 0 | 0 0 | 0 0 | 2 0 | 0 0   | 62.91 |
| IPR012868 | 2 | 121 2 2  | 0 0 | 0 0 | 0 0 | 0 0 | 0 0   | 47.24 |
| IPR012873 | 2 | 64 2 2   | 0 0 | 0 0 | 0 0 | 0 0 | 0 0   | 52.12 |
| IPR012874 | 2 | 19 1 1   | 1 1 | 0 0 | 0 0 | 0 0 | 0 0   | 13.35 |
| IPR012888 | 2 | 88 2 2   | 0 0 | 0 0 | 0 0 | 0 0 | 0 0   | 68.04 |
| IPR012889 | 2 | 95 2 1   | 1 0 | 0 0 | 0 0 | 0 0 | 0 0   | 55.04 |
| IPR012897 | 2 | 8 0 0    | 0 0 | 0 0 | 0 0 | 0 0 | 2 2   | 87.94 |
| IPR012900 | 2 | 44 0 0   | 0 0 | 2 2 | 0 0 | 0 0 | 0 0   | 37.38 |
| IPR012901 | 2 | 93 0 0   | 0 0 | 1 1 | 0 0 | 0 0 | 0 0   | 34.85 |
| IPR012903 | 2 | 228 2 2  | 0 0 | 0 0 | 0 0 | 0 0 | 0 0   | 21.92 |
| IPR012907 | 2 | 715 2 2  | 0 0 | 0 0 | 0 0 | 0 0 | 0 0   | 16.81 |
| IPR012916 | 2 | 71 0 0   | 0 0 | 1 0 | 0 0 | 1 1 | 1 0   | 32.64 |
| IPR012920 | 2 | 74 0 0   | 0 0 | 2 0 | 2 0 | 2 0 | 2 0   | 36.24 |
| IPR012953 | 2 | 75 0 0   | 0 0 | 2 0 | 0 0 | 2 0 | 2 0   | 48.31 |
| IPR012956 | 2 | 26 0 0   | 0 0 | 0 0 | 0 0 | 2 2 | 2 2   | 45.07 |
| IPR012973 | 2 | 79 0 0   | 0 0 | 1 0 | 1 0 | 1 0 | 2 1   | 54.85 |
| IPR012977 | 2 | 66 0 0   | 0 0 | 2 1 | 1 0 | 1 0 | 1 0   | 40.83 |
| IPR012987 | 2 | 23 0 0   | 0 0 | 0 0 | 0 0 | 0 0 | 2 2   | 90.88 |
| IPR012988 | 2 | 133 0 0  | 0 0 | 1 0 | 1 0 | 1 0 | 2 1   | 32.64 |
| IPR013082 | 2 | 47 1 0   | 0 0 | 2 1 | 0 0 | 0 0 | 0 0   | 60.32 |
| IPR013085 | 2 | 71 0 0   | 0 0 | 1 0 | 0 0 | 2 1 | 0 0   | 33.77 |
| IPR013116 | 2 | 768 2 1  | 1 0 | 1 0 | 0 0 | 1 0 | 0 0   | 49.82 |
| IPR013124 | 2 | 17 0 0   | 0 0 | 0 0 | 0 0 | 0 0 | 2 2   | 95.36 |
| IPR013143 | 2 | 334 0 0  | 0 0 | 2 0 | 1 0 | 2 0 | 2 0   | 15.53 |
| IPR013148 | 2 | 34 2 2   | 0 0 | 1 1 | 0 0 | 0 0 | 0 0   | 12.28 |
| IPR013153 | 2 | 293 1 0  | 0 0 | 2 1 | 0 0 | 0 0 | 0 0   | 36.21 |
| IPR013164 | 2 | 440 0 0  | 0 0 | 0 0 | 0 0 | 2 0 | 2 2   | 38.99 |
| IPR013167 | 2 | 76 0 0   | 0 0 | 1 0 | 1 1 | 0 0 | 1 0   | 27.31 |
| IPR013177 | 2 | 99 0 0   | 0 0 | 0 0 | 0 0 | 1 1 | 1 1   | 56.28 |
| IPR013180 | 2 | 68 0 0   | 0 0 | 1 1 | 0 0 | 0 0 | 1 1   | 44.99 |
| IPR013198 | 2 | 125 2 2  | 0 0 | 0 0 | 0 0 | 0 0 | 0 0   | 80.66 |
| IPR013219 | 2 | 67 0 0   | 0 0 | 0 0 | 2 2 | 0 0 | 0 0   | 32.19 |
| IPR013225 | 2 | 158 2 1  | 1 0 | 0 0 | 0 0 | 0 0 | 0 0   | 15.36 |
| IPR013238 | 2 | 80 0 0   | 0 0 | 2 1 | 1 0 | 1 0 | 1 0   | 37.12 |
| IPR013258 | 2 | 72 0 0   | 0 0 | 0 0 | 0 0 | 2 0 | 2 0   | 44.37 |
| IPR013317 | 2 | 307 2 2  | 0 0 | 0 0 | 0 0 | 0 0 | 0 0   | 19.51 |
| IPR013500 | 2 | 216 0 0  | 1 0 | 1 0 | 1 0 | 1 0 | 2 1   | 27.35 |
| IPR013512 | 2 | 639 2 1  | 0 0 | 1 0 | 1 0 | 0 0 | 0 0   | 37.06 |
| IPR013524 | 2 | 126 0 0  | 0 0 | 0 0 | 0 0 | 0 0 | 1 1   | 76.39 |
| IPR013530 | 2 | 47 1 0   | 0 0 | 0 0 | 0 0 | 0 0 | 2 1   | 49.87 |
| IPR013531 | 2 | 17 0 0   | 0 0 | 0 0 | 0 0 | 0 0 | 2 2   | 87.15 |
| IPR013532 | 2 | 13 0 0   | 0 0 | 0 0 | 0 0 | 0 0 | 2 2   | 68.76 |
| IPR013539 | 2 | 317 2 1  | 1 0 | 1 0 | 1 0 | 0 0 | 0 0   | 53.81 |
| IPR013550 | 2 | 14 2 2   | 0 0 | 0 0 | 0 0 | 0 0 | 0 0   | 32.81 |
| IPR013560 | 2 | 236 2 1  | 1 0 | 0 0 | 0 0 | 0 0 | 0 0   | 27.6  |
| IPR013579 | 2 | 70 0 0   | 0 0 | 0 0 | 0 0 | 0 0 | 2 2   | 20.15 |
| IPR013585 | 2 | 34 0 0   | 0 0 | 0 0 | 0 0 | 0 0 | 2 2   | 44.29 |
| IPR013586 | 2 | 29 0 0   | 0 0 | 2 0 | 0 0 | 2 0 | 2 0   | 70.68 |
| IPR013589 | 2 | 502 2 1  | 1 0 | 0 0 | 0 0 | 0 0 | 0 0   | 19.69 |
| IPR013593 | 2 | 11 0 0   | 0 0 | 0 0 | 0 0 | 2 2 | 0 0   | 77.41 |
| IPR013600 | 2 | 128 0 0  | 0 0 | 0 0 | 0 0 | 0 0 | 2 2   | 49.15 |
| IPR013621 | 2 | 55 0 0   | 0 0 | 1 0 | 0 0 | 0 0 | 2 1   | 61.8  |
| IPR013627 | 2 | 67 0 0   | 0 0 | 1 0 | 0 0 | 1 0 | 2 1   | 15.71 |
| IPR013629 | 2 | 55 0 0   | 0 0 | 0 0 | 0 0 | 0 0 | 2 2   | 65.44 |
| IPR013642 | 2 | 45 0 0   | 0 0 | 0 0 | 0 0 | 0 0 | 2 2   | 44.26 |
| IPR013644 | 2 | 641 2 1  | 1 0 | 1 0 | 0 0 | 1 0 | 0 0   | 59.23 |
| IPR013653 | 2 | 261 2 2  | 0 0 | 0 0 | 0 0 | 0 0 | 0 0   | 15.73 |
| IPR013659 | 2 | 98 0 0   | 0 0 | 0 0 | 0 0 | 0 0 | 2 2   | 22.66 |
| IPR013703 | 2 | 179 2 2  | 0 0 | 0 0 | 0 0 | 0 0 | 0 0   | 46.92 |
| IPR013705 | 2 | 80 0 0   | 0 0 | 2 1 | 1 0 | 1 0 | 0 0   | 41.47 |
| IPR013706 | 2 | 55 0 0   | 0 0 | 0 0 | 0 0 | 2 2 | 0 0   | 75.23 |
| IPR013732 | 2 | 32 0 0   | 0 0 | 0 0 | 0 0 | 0 0 | 2 2   | 33.93 |
| IPR013733 | 2 | 34 1 0   | 0 0 | 0 0 | 0 0 | 0 0 | 2 1   | 41.2  |
| IPR013746 | 2 | 240 1 0  | 1 0 | 2 1 | 0 0 | 1 0 | 1 0   | 24.52 |
| IPR013802 | 2 | 56 2 0   | 0 0 | 1 0 | 0 0 | 0 0 | 2 0   | 44.91 |
| IPR013821 | 2 | 79 0 0   | 0 0 | 0 0 | 0 0 | 0 0 | 2 2   | 35.36 |
| IPR013846 | 2 | 82 0 0   | 0 0 | 1 0 | 1 0 | 2 0 | 2 0   | 35.35 |
| IPR013855 | 2 | 75 0 0   | 0 0 | 2 0 | 0 0 | 2 0 | 2 0   | 38.70 |
| IPR013865 | 2 | 65 0 0   | 0 0 | 1 1 | 1 1 | 0 0 | 0 0   | 23.81 |
| IPR013872 | 2 | 23 0 0   | 0 0 | 0 0 | 0 0 | 0 0 | 2 2   | 81.47 |
| IPR013873 | 2 | 72 0 0   | 0 0 | 2 0 | 0 0 | 2 0 | 2 0   | 32.9  |
| IPR013874 | 2 | 79 0 0   | 0 0 | 2 0 | 0 0 | 2 0 | 2 0   | 30.71 |
| IPR013878 | 2 | 118 0 0  | 0 0 | 2 2 | 0 0 | 0 0 | 0 0   | 40.2  |
| IPR013881 | 2 | 97 0 0   | 0 0 | 0 0 | 1 1 | 0 0 | 1 1   | 38.47 |
| IPR013882 | 2 | 45 0 0   | 0 0 | 0 0 | 0 0 | 1 1 | 1 1   | 24.97 |
| IPR013890 | 2 | 37 0 0   | 0 0 | 0 0 | 0 0 | 1 1 | 0 0   | 49.93 |
| IPR013892 | 2 | 116 0 0  | 0 0 | 2 2 | 0 0 | 0 0 | 0 0   | 17.46 |
| IPR013896 | 2 | 30 0 0   | 0 0 | 0 0 | 0 0 | 2 2 | 0 0   | 47.58 |
| IPR013908 | 2 | 11 0 0   | 0 0 | 0 0 | 0 0 | 0 0 | 2 2   | 69.35 |
| IPR013914 | 2 | 26 0 0   | 0 0 | 0 0 | 0 0 | 2 2 | 0 0   | 29.59 |
| IPR013918 | 2 | 67 0 0   | 0 0 | 2 0 | 0 0 | 2 0 | 2 0   | 27.09 |
| IPR013929 | 2 | 67 0 0   | 0 0 | 5 4 | 0 0 | 1 0 | 1 0   | 35.05 |
| IPR013930 | 2 | 58 0 0   | 0 0 | 5 4 | 0 0 | 1 0 | 1 0   | 35.2  |
| IPR013935 | 2 | 47 0 0   | 0 0 | 1 1 | 0 0 | 2 2 | 0 0   | 22.32 |
| IPR013947 | 2 | 70 0 0   | 0 0 | 0 0 | 0 0 | 2 2 | 0 0   | 31.21 |
| IPR013953 | 2 | 82 0 0   | 0 0 | 2 0 | 2 0 | 2 0 | 2 0   | 46.18 |
| IPR013973 | 2 | 88 2 2   | 0 0 | 0 0 | 0 0 | 0 0 | 0 0   | 15.46 |
| IPR013988 | 2 | 407 2 1  | 0 0 | 1 0 | 0 0 | 0 0 | 0 0   | 58.4  |
| IPR014009 | 2 | 5 0 0    | 0 0 | 1 1 | 0 0 | 0 0 | 1 1   | 13.48 |
| IPR014013 | 2 | 58 2 1   | 1 0 | 0 0 | 0 0 | 0 0 | 0 0   | 25.96 |
| IPR014021 | 2 | 13 2 2   | 0 0 | 0 0 | 0 0 | 0 0 | 0 0   | 7.64  |
| IPR014051 | 2 | 848 2 2  | 0 0 | 0 0 | 0 0 | 0 0 | 0 0   | 9.27  |
| IPR014779 | 2 | 1366 2 2 | 0 0 | 0 0 | 0 0 | 0 0 | 0 0   | 12.63 |
| IPR014781 | 2 | 12 2 2   | 0 0 | 0 0 | 0 0 | 0 0 | 0 0   | 30.75 |
| IPR014799 | 2 | 39 0 0   | 0 0 | 0 0 | 0 0 | 0 0 | 2 2   | 34.57 |
| IPR014816 | 2 | 238 1 1  | 0 0 | 0 0 | 0 0 | 1 1 | 0 0   | 25.53 |
| IPR014857 | 2 | 61 0 0   | 0 0 | 1 0 | 0 0 | 2 1 | 1 0   | 35.89 |
| IPR014859 | 2 | 22 0 0   | 0 0 | 2 2 | 0 0 | 0 0 | 0 0   | 24.97 |
| IPR014868 | 2 | 77 0 0   | 0 0 | 0 0 | 0 0 | 0 0 | 2 2   | 28.08 |
| IPR014870 | 2 | 61 1 1   | 0 0 | 0 0 | 0 0 | 1 1 | 0 0   | 33.79 |
| IPR014882 | 2 | 30 0 0   | 0 0 | 0 0 | 1 0 | 0 0 | 2 1   | 46.32 |
| IPR014885 | 2 | 45 0 0   | 0 0 | 0 0 | 0 0 | 2 2 | 0 0   | 58.56 |
| IPR014886 | 2 | 76 0 0   | 0 0 | 2 0 | 0 0 | 2 0 | 2 0   | 20.55 |
| IPR014890 | 2 | 66 0 0   | 0 0 | 0 0 | 0 0 | 0 0 | 2 2   | 47.11 |
| IPR014896 | 2 | 43 0 0   | 0 0 | 0 0 | 0 0 | 0 0 | 2 2   | 72.5  |
| IPR014907 | 2 | 18 2 2   | 0 0 | 0 0 | 0 0 | 0 0 | 0 0   | 18.45 |
| IPR014908 | 2 | 105 0 0  | 0 0 | 1 0 | 0 0 | 1 0 | 2 1   | 15.76 |
| IPR014915 | 2 | 25 0 0   | 0 0 | 2 2 | 0 0 | 0 0 | 0 0   | 27.66 |
| IPR014936 | 2 | 37 0 0   | 0 0 | 0 0 | 0 0 | 0 0 | 2 2   | 59.34 |
| IPR014944 | 2 | 104 2 2  | 0 0 | 0 0 | 0 0 | 0 0 | 0 0   | 35.68 |
| IPR014958 | 2 | 67 1 1   | 1 1 | 0 0 | 0 0 | 0 0 | 0 0   | 29.04 |
| IPR01     |   |          |     |     |     |     |       |       |

|           |   |         |     |     |     |     |     |       |
|-----------|---|---------|-----|-----|-----|-----|-----|-------|
| IPR015011 | 2 | 46 0 0  | 2 2 | 0 0 | 0 0 | 0 0 | 0 0 | 43.76 |
| IPR015012 | 2 | 25 0 0  | 0 0 | 0 0 | 0 0 | 0 0 | 2 2 | 48.78 |
| IPR015035 | 2 | 45 2 2  | 0 0 | 0 0 | 0 0 | 0 0 | 0 0 | 48.23 |
| IPR015036 | 2 | 42 0 0  | 0 0 | 0 0 | 0 0 | 0 0 | 2 2 | 55.78 |
| IPR015041 | 2 | 63 2 2  | 0 0 | 0 0 | 0 0 | 0 0 | 0 0 | 76.52 |
| IPR015054 | 2 | 7 0 0   | 0 0 | 0 0 | 0 0 | 0 0 | 2 2 | 79.25 |
| IPR015059 | 2 | 8 2 2   | 0 0 | 0 0 | 0 0 | 0 0 | 0 0 | 76.78 |
| IPR015094 | 2 | 76 2 2  | 0 0 | 0 0 | 0 0 | 0 0 | 0 0 | 30.89 |
| IPR015096 | 2 | 85 0 0  | 0 0 | 0 0 | 0 0 | 0 0 | 2 2 | 46.93 |
| IPR015097 | 2 | 10 0 0  | 0 0 | 0 0 | 0 0 | 0 0 | 2 2 | 60.42 |
| IPR015104 | 2 | 12 0 0  | 0 0 | 0 0 | 0 0 | 0 0 | 2 2 | 46.16 |
| IPR015117 | 2 | 22 2 2  | 0 0 | 0 0 | 0 0 | 0 0 | 0 0 | 35.01 |
| IPR015120 | 2 | 38 0 0  | 0 0 | 2 0 | 2 0 | 0 0 | 2 0 | 29.6  |
| IPR015128 | 2 | 11 0 0  | 0 0 | 0 0 | 0 0 | 0 0 | 2 2 | 67.33 |
| IPR015135 | 2 | 6 0 0   | 0 0 | 0 0 | 0 0 | 0 0 | 2 2 | 98.42 |
| IPR015136 | 2 | 6 0 0   | 0 0 | 0 0 | 0 0 | 0 0 | 2 2 | 99.01 |
| IPR015137 | 2 | 6 0 0   | 0 0 | 0 0 | 0 0 | 0 0 | 2 2 | 85.29 |
| IPR015152 | 2 | 77 0 0  | 0 0 | 0 0 | 0 0 | 0 0 | 3 3 | 27.84 |
| IPR015156 | 2 | 7 0 0   | 2 2 | 0 0 | 0 0 | 0 0 | 0 0 | 94.94 |
| IPR015165 | 2 | 3 2 2   | 0 0 | 0 0 | 0 0 | 0 0 | 0 0 | 65.71 |
| IPR015174 | 2 | 86 0 0  | 0 0 | 2 0 | 0 0 | 2 0 | 2 0 | 21.33 |
| IPR015178 | 2 | 23 2 0  | 2 0 | 0 0 | 0 0 | 0 0 | 0 0 | 49.4  |
| IPR015179 | 2 | 24 2 0  | 2 0 | 0 0 | 0 0 | 0 0 | 0 0 | 15.19 |
| IPR015182 | 2 | 13 2 2  | 0 0 | 0 0 | 0 0 | 0 0 | 0 0 | 62.24 |
| IPR015184 | 2 | 14 2 2  | 0 0 | 0 0 | 0 0 | 0 0 | 0 0 | 52.55 |
| IPR015199 | 2 | 113 2 2 | 0 0 | 0 0 | 0 0 | 0 0 | 0 0 | 25.78 |
| IPR015203 | 2 | 18 2 2  | 0 0 | 0 0 | 0 0 | 0 0 | 0 0 | 51.26 |
| IPR015211 | 2 | 138 1 0 | 0 0 | 1 0 | 0 0 | 2 1 | 1 0 | 21.02 |
| IPR015213 | 2 | 12 2 2  | 0 0 | 0 0 | 0 0 | 0 0 | 0 0 | 60.55 |
| IPR015216 | 2 | 27 0 0  | 0 0 | 1 1 | 0 0 | 0 0 | 2 2 | 24.92 |
| IPR015228 | 2 | 3 0 0   | 0 0 | 0 0 | 0 0 | 2 2 | 0 0 | 72.24 |
| IPR015243 | 2 | 53 2 2  | 0 0 | 0 0 | 0 0 | 0 0 | 0 0 | 61.58 |
| IPR015246 | 2 | 189 2 2 | 0 0 | 0 0 | 0 0 | 2 0 | 0 0 | 52.94 |
| IPR015248 | 2 | 10 0 0  | 0 0 | 2 0 | 0 0 | 0 0 | 2 0 | 56.35 |
| IPR015251 | 2 | 47 2 2  | 0 0 | 0 0 | 0 0 | 0 0 | 0 0 | 36.2  |
| IPR015253 | 2 | 10 0 0  | 0 0 | 0 0 | 0 0 | 0 0 | 2 2 | 44.98 |
| IPR015260 | 2 | 118 0 0 | 0 0 | 2 1 | 1 0 | 1 0 | 1 0 | 25.72 |
| IPR015264 | 2 | 5 0 0   | 0 0 | 2 2 | 0 0 | 0 0 | 0 0 | 76.76 |
| IPR015284 | 2 | 3 0 0   | 0 0 | 0 0 | 0 0 | 2 2 | 0 0 | 71.27 |
| IPR015285 | 2 | 109 0 0 | 1 0 | 1 0 | 1 0 | 2 1 | 1 0 | 38.39 |
| IPR015315 | 2 | 127 2 2 | 0 0 | 0 0 | 0 0 | 0 0 | 0 0 | 19.31 |
| IPR015320 | 2 | 60 1 0  | 2 1 | 1 0 | 0 0 | 0 0 | 0 0 | 43.66 |
| IPR015344 | 2 | 10 2 2  | 0 0 | 0 0 | 0 0 | 0 0 | 0 0 | 45.85 |
| IPR015349 | 2 | 275 2 0 | 0 0 | 2 0 | 0 0 | 0 0 | 0 0 | 29.56 |
| IPR015350 | 2 | 49 0 0  | 0 0 | 0 0 | 0 0 | 1 0 | 2 1 | 65.97 |
| IPR015351 | 2 | 49 0 0  | 0 0 | 0 0 | 0 0 | 1 0 | 2 1 | 61.65 |
| IPR015361 | 2 | 4 2 2   | 0 0 | 0 0 | 0 0 | 0 0 | 0 0 | 43.06 |
| IPR015369 | 2 | 3 0 0   | 0 0 | 0 0 | 0 0 | 0 0 | 2 2 | 40.34 |
| IPR015371 | 2 | 7 0 0   | 0 0 | 0 0 | 0 0 | 0 0 | 2 2 | 78.98 |
| IPR015373 | 2 | 126 1 1 | 0 0 | 0 0 | 0 0 | 0 0 | 1 1 | 14.55 |
| IPR015388 | 2 | 6 0 0   | 0 0 | 0 0 | 0 0 | 0 0 | 2 2 | 55.35 |
| IPR015394 | 2 | 45 1 0  | 0 0 | 0 0 | 0 0 | 0 0 | 2 1 | 38.35 |
| IPR015395 | 2 | 49 0 0  | 0 0 | 0 0 | 0 0 | 0 0 | 2 2 | 38.35 |
| IPR015408 | 2 | 68 0 0  | 0 0 | 0 0 | 1 0 | 1 1 | 1 0 | 39.68 |
| IPR015411 | 2 | 27 0 0  | 0 0 | 1 1 | 1 0 | 0 0 | 1 0 | 38.03 |
| IPR015496 | 2 | 8 0 0   | 0 0 | 0 0 | 1 1 | 0 0 | 0 0 | 20.27 |
| IPR015500 | 2 | 15 1 1  | 0 0 | 1 1 | 0 0 | 0 0 | 0 0 | 6.15  |
| IPR015609 | 2 | 13 1 1  | 0 0 | 0 0 | 1 0 | 1 0 | 0 0 | 33.78 |
| IPR015621 | 2 | 6 0 0   | 0 0 | 0 0 | 0 0 | 0 0 | 2 2 | 30.65 |
| IPR015633 | 2 | 7 0 0   | 0 0 | 0 0 | 0 0 | 0 0 | 2 2 | 38.48 |
| IPR015655 | 2 | 6 1 1   | 0 0 | 0 0 | 1 1 | 0 0 | 0 0 | 13.64 |
| IPR015679 | 2 | 13 2 1  | 0 0 | 0 0 | 0 0 | 2 0 | 0 0 | 30.39 |
| IPR015752 | 2 | 5 0 0   | 0 0 | 0 0 | 0 0 | 0 0 | 2 2 | 34.55 |
| IPR015766 | 2 | 16 0 0  | 0 0 | 2 2 | 0 0 | 0 0 | 0 0 | 25.41 |
| IPR015814 | 2 | 61 2 0  | 1 0 | 0 0 | 0 0 | 2 0 | 0 0 | 19.44 |
| IPR015850 | 2 | 858 2 1 | 1 0 | 0 0 | 0 0 | 0 0 | 0 0 | 56.92 |
| IPR015877 | 2 | 75 0 0  | 0 0 | 1 0 | 1 0 | 1 0 | 0 0 | 25.73 |
| IPR015878 | 2 | 23 2 2  | 0 0 | 0 0 | 0 0 | 0 0 | 0 0 | 20.24 |
| IPR015895 | 2 | 624 2 0 | 2 0 | 3 1 | 0 0 | 0 0 | 0 0 | 33.2  |
| IPR015896 | 2 | 579 2 0 | 2 0 | 2 0 | 0 0 | 0 0 | 0 0 | 19.31 |
| IPR015904 | 2 | 12 1 1  | 0 0 | 0 0 | 1 1 | 0 0 | 0 0 | 25.52 |
| IPR015908 | 2 | 259 1 1 | 0 0 | 0 0 | 0 0 | 1 1 | 0 0 | 36.85 |
| IPR015985 | 2 | 227 2 2 | 0 0 | 0 0 | 0 0 | 0 0 | 0 0 | 15.94 |
| IPR016017 | 2 | 173 0 0 | 0 0 | 0 0 | 0 0 | 0 0 | 1 1 | 17.73 |
| IPR016158 | 2 | 14 0 0  | 0 0 | 1 0 | 1 0 | 0 0 | 2 1 | 15.87 |
| IPR016582 | 2 | 43 1 1  | 0 0 | 1 1 | 0 0 | 0 0 | 0 0 | 50.78 |
| IPR016866 | 2 | 81 2 2  | 0 0 | 0 0 | 0 0 | 0 0 | 0 0 | 26.53 |
| IPR017444 | 2 | 170 1 0 | 1 0 | 3 2 | 0 0 | 0 0 | 0 0 | 47.74 |
| IPR017454 | 2 | 8 0 0   | 0 0 | 0 0 | 0 0 | 2 2 | 0 0 | 80.86 |
| IPR017894 | 2 | 47 2 2  | 0 0 | 0 0 | 0 0 | 0 0 | 0 0 | 19.46 |
| IPR018003 | 2 | 25 2 2  | 0 0 | 0 0 | 0 0 | 0 0 | 0 0 | 21.27 |
| IPR018125 | 2 | 87 0 0  | 0 0 | 0 0 | 0 0 | 1 0 | 2 1 | 60.71 |
| IPR018143 | 2 | 66 0 0  | 0 0 | 1 0 | 0 0 | 0 0 | 3 2 | 19.07 |
| IPR018156 | 2 | 25 1 0  | 0 0 | 1 0 | 1 0 | 1 0 | 2 1 | 29.27 |
| IPR018227 | 2 | 688 0 0 | 0 0 | 2 2 | 0 0 | 0 0 | 0 0 | 18.72 |
| IPR018302 | 2 | 4 0 0   | 0 0 | 0 0 | 0 0 | 0 0 | 2 2 | 57.1  |
| IPR018445 | 2 | 388 1 1 | 1 1 | 0 0 | 0 0 | 0 0 | 0 0 | 15.37 |
| IPR018473 | 2 | 10 0 0  | 0 0 | 0 0 | 0 0 | 0 0 | 2 2 | 44.36 |
| IPR018504 | 2 | 10 2 2  | 0 0 | 0 0 | 0 0 | 0 0 | 0 0 | 62.58 |
| IPR018513 | 2 | 183 2 2 | 0 0 | 0 0 | 0 0 | 0 0 | 0 0 | 15.82 |
| IPR018515 | 2 | 56 0 0  | 0 0 | 0 0 | 0 0 | 2 0 | 0 0 | 32.68 |
| IPR018533 | 2 | 53 0 0  | 0 0 | 0 0 | 0 0 | 0 0 | 2 2 | 48.56 |
| IPR018553 | 2 | 20 0 0  | 0 0 | 0 0 | 0 0 | 1 1 | 0 0 | 43.04 |
| IPR018568 | 2 | 16 0 0  | 0 0 | 2 2 | 0 0 | 0 0 | 0 0 | 28.73 |
| IPR018588 | 2 | 69 2 2  | 0 0 | 0 0 | 0 0 | 0 0 | 0 0 | 30.78 |
| IPR018618 | 2 | 71 0 0  | 0 0 | 0 0 | 0 0 | 2 2 | 0 0 | 37.42 |
| IPR018619 | 2 | 58 0 0  | 0 0 | 2 2 | 0 0 | 0 0 | 0 0 | 27.79 |
| IPR018628 | 2 | 33 0 0  | 0 0 | 0 0 | 0 0 | 0 0 | 2 2 | 36.87 |
| IPR018632 | 2 | 138 2 2 | 0 0 | 0 0 | 0 0 | 0 0 | 0 0 | 35.2  |
| IPR018653 | 2 | 162 2 2 | 0 0 | 0 0 | 0 0 | 0 0 | 0 0 | 41.65 |
| IPR018667 | 2 | 127 2 2 | 0 0 | 0 0 | 0 0 | 0 0 | 0 0 | 55.13 |
| IPR018689 | 2 | 25 3 3  | 0 0 | 0 0 | 0 0 | 0 0 | 0 0 | 32.84 |
| IPR018705 | 2 | 133 2 2 | 0 0 | 0 0 | 0 0 | 0 0 | 0 0 | 10.09 |
| IPR018709 | 2 | 177 2 0 | 2 0 | 0 0 | 0 0 | 0 0 | 0 0 | 23.05 |
| IPR018752 | 2 | 107 2 2 | 0 0 | 0 0 | 0 0 | 0 0 | 0 0 | 30.69 |
| IPR018758 | 2 | 55 2 2  | 0 0 | 0 0 | 0 0 | 0 0 | 0 0 | 31.17 |
| IPR018763 | 2 | 105 2 2 | 0 0 | 0 0 | 0 0 | 0 0 | 0 0 | 14.84 |
| IPR018779 | 2 | 101 2 2 | 0 0 | 0 0 | 0 0 | 0 0 | 0 0 | 25.44 |
| IPR018782 | 2 | 30 0 0  | 0 0 | 0 0 | 0 0 | 0 0 | 2 2 | 41.2  |
| IPR018793 | 2 | 66 0 0  | 0 0 | 1 1 | 0 0 | 0 0 | 1 1 | 43.2  |
| IPR018808 | 2 | 72 0 0  | 0 0 | 0 0 | 0 0 | 1 0 | 2 1 | 37.16 |
| IPR018810 | 2 | 59 0 0  | 0 0 | 0 0 | 0 0 | 0 0 | 0 0 | 33.41 |
| IPR018820 | 2 | 32 0 0  | 0 0 | 0 0 | 0 0 | 2 2 | 0 0 | 15.11 |
| IPR018825 | 2 | 53 0 0  | 0 0 | 0 0 | 0 0 | 2 2 | 0 0 | 31.99 |
| IPR018826 | 2 | 64 0 0  | 0 0 | 0 0 | 0 0 | 1 1 | 1 1 | 24.55 |
| IPR018857 | 2 | 14 0 0  | 0 0 | 0 0 | 0 0 | 2 2 | 0 0 | 20.43 |
| IPR018882 | 2 | 42 0 0  | 0 0 | 0 0 | 0 0 | 0 0 | 2 2 | 64.5  |
| IPR018884 | 2 | 16 0 0  | 0 0 | 0 0 | 0 0 | 0 0 | 2 2 | 41.48 |
| IPR018911 | 2 | 23 2 2  | 0 0 | 0 0 | 0 0 | 0 0 | 0 0 | 19.17 |
| IPR018925 | 2 | 12 2 2  | 0 0 | 0 0 | 0 0 | 0 0 | 0 0 | 36.03 |
| IPR018947 | 2 | 10 0 0  | 0 0 | 0 0 | 0 0 | 0 0 | 2 2 | 89.14 |
| IPR018952 | 2 | 121 0 0 | 0 0 | 0 0 | 0 0 | 0 0 | 2 2 | 48.84 |
| IPR018962 | 2 | 86 0 0  | 0 0 | 2 2 | 0 0 | 0 0 | 0 0 | 18.91 |
| IPR018983 | 2 | 80 0 0  | 0 0 | 2 0 | 2 0 | 2 0 | 2 0 | 23.96 |
| IPR018984 | 2 | 23 2 2  | 0 0 | 0 0 | 0 0 | 0 0 | 0 0 | 46.2  |
| IPR019006 | 2 | 21 0 0  | 0 0 | 0 0 | 0 0 | 0 0 | 0 0 | 59.38 |
| IPR019010 | 2 | 87 0 0  | 0 0 | 1 0 | 1 0 | 1 0 | 1 0 | 40.19 |
| IPR019019 | 2 | 36 0 0  | 0 0 | 0 0 | 0 0 | 1 1 | 0 0 | 17.72 |
| IPR019130 | 2 | 51 0 0  | 0 0 | 0 0 | 0 0 | 0 0 | 2 2 | 53.19 |
| IPR019134 | 2 | 70 0 0  | 0 0 | 1 0 | 1 0 | 1 0 | 2 1 | 64.6  |
| IPR019136 | 2 | 88 0 0  | 0 0 | 3 3 | 1 0 | 1 0 | 0 0 | 51.51 |
| IPR019137 | 2 | 61 0 0  | 0 0 | 2 2 | 1 0 | 0 0 | 0 0 | 30.17 |
| IPR019145 | 2 | 70 0 0  | 0 0 | 1 1 | 0 0 | 0 0 | 1 1 | 34.84 |
| IPR019154 | 2 | 89 0 0  | 0 0 | 0 0 | 0 0 | 1 0 | 2 1 | 15.88 |
| IPR019156 | 2 | 70 0 0  | 0 0 | 0 0 | 0 0 | 1 1 | 1 1 | 30.36 |
| IPR019163 | 2 | 70 0 0  | 0 0 | 0 0 | 0 0 | 1 1 | 1 1 | 28.84 |
| IPR019165 | 2 | 60 0 0  | 0 0 | 0 0 | 0 0 | 1 1 | 0 0 | 42.44 |
| IPR019167 | 2 | 105 0 0 | 0 0 | 0 0 | 0 0 | 0 0 | 2 2 | 16.46 |
| IPR019176 | 2 | 41 0 0  | 0 0 | 0 0 | 0 0 | 0 0 | 2 2 | 28.58 |
| IPR019190 | 2 | 49 0 0  | 0 0 | 0 0 | 0 0 | 2 2 | 0 0 | 28.69 |
| IPR019197 | 2 | 90 0 0  | 0 0 | 0 0 | 0 0 | 2 2 | 0 0 | 27.72 |
| IPR019220 | 2 | 61 2 2  | 0 0 | 0 0 | 0 0 | 0 0 | 0 0 | 49.59 |
| IPR019249 | 2 | 11 0 0  | 0 0 | 0 0 | 2 2 | 0 0 | 0 0 | 22.28 |
| IPR019251 | 2 | 136 2 2 | 0 0 | 0 0 | 0 0 | 0 0 | 0 0 | 14.44 |
| IPR019261 | 2 | 74 1 1  | 0 0 | 1 1 | 0 0 | 1 1 | 0 0 | 25.65 |
| IPR019283 | 2 | 37 2 2  | 0 0 | 0 0 | 0 0 | 0 0 | 0 0 | 25.49 |
| IPR019291 | 2 | 123 1 1 | 0 0 |     |     |     |     |       |

|           |   |          |     |     |     |     |       |
|-----------|---|----------|-----|-----|-----|-----|-------|
| IPRO19297 | 2 | 116 2 2  | 0 0 | 0 0 | 0 0 | 0 0 | 25.93 |
| IPRO19306 | 2 | 31 0 0   | 0 0 | 0 0 | 0 0 | 0 0 | 30    |
| IPRO19328 | 2 | 61 0 0   | 0 0 | 1 1 | 0 0 | 0 0 | 28.91 |
| IPRO19335 | 2 | 51 0 0   | 0 0 | 0 0 | 0 0 | 1 1 | 25.53 |
| IPRO19343 | 2 | 29 0 0   | 0 0 | 0 0 | 0 0 | 3 3 | 49.85 |
| IPRO19344 | 2 | 48 0 0   | 0 0 | 0 0 | 0 0 | 2 2 | 48.09 |
| IPRO19362 | 2 | 58 0 0   | 0 0 | 1 1 | 0 0 | 0 0 | 17.59 |
| IPRO19380 | 2 | 73 0 0   | 0 0 | 0 0 | 0 0 | 1 1 | 51.08 |
| IPRO19387 | 2 | 30 0 0   | 0 0 | 1 1 | 0 0 | 0 0 | 49.48 |
| IPRO19395 | 2 | 39 0 0   | 0 0 | 0 0 | 0 0 | 0 0 | 42.37 |
| IPRO19413 | 2 | 36 0 0   | 0 0 | 0 0 | 0 0 | 1 1 | 30.01 |
| IPRO19414 | 2 | 45 0 0   | 0 0 | 0 0 | 0 0 | 2 2 | 28.36 |
| IPRO19431 | 2 | 27 0 0   | 0 0 | 0 0 | 0 0 | 2 2 | 43.35 |
| IPRO19450 | 2 | 125 2 1  | 0 0 | 0 0 | 0 0 | 1 0 | 46.39 |
| IPRO19451 | 2 | 6 0 0    | 0 0 | 0 0 | 0 0 | 3 3 | 49.76 |
| IPRO19455 | 2 | 694 1 0  | 1 0 | 1 0 | 0 0 | 1 0 | 38.68 |
| IPRO19461 | 2 | 69 0 0   | 0 0 | 2 0 | 2 0 | 2 0 | 71.52 |
| IPRO19467 | 2 | 70 0 0   | 0 0 | 2 1 | 1 1 | 1 0 | 28.99 |
| IPRO19468 | 2 | 675 2 1  | 1 0 | 0 0 | 0 0 | 1 0 | 23.84 |
| IPRO19481 | 2 | 62 0 0   | 0 0 | 0 0 | 0 0 | 1 1 | 38.69 |
| IPRO19482 | 2 | 24 0 0   | 0 0 | 0 0 | 0 0 | 2 2 | 42.22 |
| IPRO19486 | 2 | 18 0 0   | 0 0 | 0 0 | 0 0 | 0 0 | 43.13 |
| IPRO19491 | 2 | 270 2 1  | 1 0 | 1 0 | 1 0 | 0 0 | 23.67 |
| IPRO19497 | 2 | 58 0 0   | 0 0 | 0 0 | 0 0 | 2 0 | 37.2  |
| IPRO19501 | 2 | 23 2 2   | 0 0 | 0 0 | 0 0 | 0 0 | 20.45 |
| IPRO19513 | 2 | 7 0 0    | 0 0 | 0 0 | 0 0 | 2 2 | 31.52 |
| IPRO19525 | 2 | 41 0 0   | 0 0 | 0 0 | 0 0 | 2 2 | 61.32 |
| IPRO19539 | 2 | 445 2 0  | 2 0 | 2 0 | 2 0 | 2 0 | 39.29 |
| IPRO19544 | 2 | 64 0 0   | 0 0 | 0 0 | 0 0 | 0 0 | 34.63 |
| IPRO19548 | 2 | 83 0 0   | 0 0 | 0 0 | 0 0 | 2 2 | 83.98 |
| IPRO19564 | 2 | 105 0 0  | 0 0 | 0 0 | 0 0 | 2 2 | 21.43 |
| IPRO19569 | 2 | 29 0 0   | 0 0 | 0 0 | 0 0 | 3 3 | 84.99 |
| IPRO19594 | 2 | 52 0 0   | 0 0 | 0 0 | 0 0 | 2 2 | 35.57 |
| IPRO19604 | 2 | 13 2 2   | 0 0 | 0 0 | 0 0 | 0 0 | 43.56 |
| IPRO19610 | 2 | 30 0 0   | 0 0 | 0 0 | 0 0 | 2 2 | 40.54 |
| IPRO19626 | 2 | 374 2 2  | 0 0 | 0 0 | 0 0 | 0 0 | 42.19 |
| IPRO19635 | 2 | 81 0 0   | 0 0 | 0 0 | 0 0 | 0 0 | 44.73 |
| IPRO19680 | 2 | 60 0 0   | 0 0 | 0 0 | 0 0 | 2 2 | 22.03 |
| IPRO19774 | 2 | 318 0 0  | 0 0 | 0 0 | 0 0 | 0 0 | 32.58 |
| IPRO20193 | 2 | 27 2 2   | 0 0 | 0 0 | 0 0 | 0 0 | 32.31 |
| IPRO20220 | 2 | 24 2 2   | 0 0 | 0 0 | 0 0 | 0 0 | 54.76 |
| IPRO20391 | 2 | 7 1 1    | 1 1 | 0 0 | 0 0 | 0 0 | 36.78 |
| IPRO20588 | 2 | 28 0 0   | 1 1 | 1 1 | 1 1 | 0 0 | 13.42 |
| IPRO20639 | 2 | 18 2 1   | 0 0 | 0 0 | 1 0 | 0 0 | 29.07 |
| IPRO20810 | 2 | 1037 1 0 | 1 0 | 2 1 | 0 0 | 1 0 | 53.67 |
| IPRO20818 | 2 | 55 0 0   | 0 0 | 2 2 | 0 0 | 0 0 | 29.65 |
| IPRO20821 | 2 | 35 0 0   | 0 0 | 0 0 | 0 0 | 0 0 | 13.05 |
| IPRO20941 | 2 | 152 2 2  | 0 0 | 0 0 | 0 0 | 1 1 | 8.2   |
| IPRO20966 | 2 | 96 0 0   | 0 0 | 1 1 | 0 0 | 1 1 | 33.63 |
| IPRO20968 | 2 | 4 2 2    | 0 0 | 0 0 | 0 0 | 0 0 | 66.42 |
| IPRO20969 | 2 | 16 0 0   | 0 0 | 0 0 | 0 0 | 2 2 | 67.73 |
| IPRO20978 | 2 | 22 0 0   | 0 0 | 2 2 | 0 0 | 0 0 | 38.51 |
| IPRO20997 | 2 | 5 0 0    | 0 0 | 0 0 | 0 0 | 2 2 | 74.95 |
| IPRO21024 | 2 | 23 0 0   | 0 0 | 0 0 | 0 0 | 2 2 | 54.61 |
| IPRO21027 | 2 | 34 2 0   | 2 0 | 0 0 | 0 0 | 0 0 | 20.01 |
| IPRO21029 | 2 | 42 2 0   | 0 0 | 0 0 | 0 0 | 0 0 | 35.38 |
| IPRO21040 | 2 | 56 0 0   | 0 0 | 0 0 | 0 0 | 2 2 | 34.77 |
| IPRO21056 | 2 | 32 0 0   | 0 0 | 0 0 | 0 0 | 2 2 | 38.79 |
| IPRO21064 | 2 | 20 0 0   | 0 0 | 0 0 | 0 0 | 2 2 | 51.57 |
| IPRO21068 | 2 | 13 2 1   | 1 0 | 0 0 | 0 0 | 0 0 | 38.39 |
| IPRO21095 | 2 | 102 2 2  | 0 0 | 0 0 | 0 0 | 0 0 | 22.49 |
| IPRO21096 | 2 | 15 2 2   | 0 0 | 0 0 | 0 0 | 2 0 | 15.17 |
| IPRO21102 | 2 | 64 0 0   | 0 0 | 2 2 | 0 0 | 0 0 | 31.65 |
| IPRO21105 | 2 | 4 0 0    | 0 0 | 0 0 | 0 0 | 2 2 | 77.5  |
| IPRO21138 | 2 | 151 0 0  | 0 0 | 0 0 | 0 0 | 2 2 | 39.24 |
| IPRO21148 | 2 | 68 0 0   | 0 0 | 2 2 | 0 0 | 0 0 | 41.09 |
| IPRO21149 | 2 | 95 0 0   | 0 0 | 1 1 | 0 0 | 0 0 | 27.48 |
| IPRO21211 | 2 | 18 0 0   | 0 0 | 0 0 | 0 0 | 2 2 | 40.48 |
| IPRO21229 | 2 | 131 2 1  | 1 0 | 0 0 | 0 0 | 0 0 | 15.72 |
| IPRO21235 | 2 | 34 3 3   | 0 0 | 0 0 | 0 0 | 0 0 | 19.01 |
| IPRO21243 | 2 | 81 2 2   | 0 0 | 0 0 | 0 0 | 0 0 | 22.08 |
| IPRO21256 | 2 | 84 2 2   | 0 0 | 0 0 | 0 0 | 0 0 | 15.38 |
| IPRO21270 | 2 | 50 2 2   | 0 0 | 0 0 | 0 0 | 0 0 | 31.41 |
| IPRO21295 | 2 | 167 2 2  | 0 0 | 0 0 | 0 0 | 0 0 | 14.14 |
| IPRO21314 | 2 | 51 2 2   | 0 0 | 0 0 | 0 0 | 0 0 | 28.25 |
| IPRO21322 | 2 | 56 2 2   | 0 0 | 0 0 | 0 0 | 0 0 | 33.57 |
| IPRO21341 | 2 | 59 2 2   | 0 0 | 0 0 | 0 0 | 0 0 | 43.78 |
| IPRO21384 | 2 | 73 0 0   | 0 0 | 1 1 | 0 0 | 1 1 | 24.58 |
| IPRO21416 | 2 | 48 2 2   | 0 0 | 0 0 | 0 0 | 0 0 | 24.09 |
| IPRO21424 | 2 | 55 0 0   | 2 2 | 0 0 | 0 0 | 0 0 | 18.56 |
| IPRO21451 | 2 | 58 2 2   | 0 0 | 0 0 | 0 0 | 0 0 | 30.28 |
| IPRO21494 | 2 | 47 2 2   | 0 0 | 0 0 | 0 0 | 0 0 | 33.4  |
| IPRO21538 | 2 | 9 0 0    | 0 0 | 0 0 | 0 0 | 2 2 | 42.66 |
| IPRO21548 | 2 | 59 1 1   | 0 0 | 1 1 | 0 0 | 0 0 | 51.98 |
| IPRO21565 | 2 | 26 0 0   | 0 0 | 0 0 | 1 0 | 2 1 | 52.65 |
| IPRO21600 | 2 | 27 0 0   | 0 0 | 0 0 | 0 0 | 2 2 | 45.82 |
| IPRO21601 | 2 | 10 0 0   | 0 0 | 0 0 | 0 0 | 3 3 | 33.29 |
| IPRO21605 | 2 | 10 0 0   | 0 0 | 0 0 | 0 0 | 2 2 | 32.51 |
| IPRO21625 | 2 | 93 0 0   | 0 0 | 1 0 | 0 0 | 1 0 | 18.73 |
| IPRO21640 | 2 | 58 0 0   | 0 0 | 2 2 | 0 0 | 0 0 | 26.15 |
| IPRO21646 | 2 | 6 0 0    | 0 0 | 0 0 | 0 0 | 2 2 | 33.31 |
| IPRO21654 | 2 | 17 0 0   | 0 0 | 0 0 | 0 0 | 0 0 | 78.23 |
| IPRO21725 | 2 | 48 0 0   | 2 2 | 0 0 | 0 0 | 0 0 | 33.13 |
| IPRO21740 | 2 | 94 0 0   | 0 0 | 0 0 | 0 0 | 2 2 | 29.17 |
| IPRO21747 | 2 | 134 1 1  | 0 0 | 0 0 | 0 0 | 0 0 | 20.25 |
| IPRO21764 | 2 | 95 2 2   | 0 0 | 0 0 | 0 0 | 0 0 | 33.66 |
| IPRO21776 | 2 | 67 2 2   | 0 0 | 0 0 | 0 0 | 0 0 | 23.16 |
| IPRO21780 | 2 | 27 0 0   | 0 0 | 0 0 | 0 0 | 0 0 | 47.1  |
| IPRO21785 | 2 | 26 0 0   | 0 0 | 0 0 | 0 0 | 0 0 | 64.01 |
| IPRO21786 | 2 | 70 0 0   | 0 0 | 2 1 | 1 0 | 1 0 | 35.06 |
| IPRO21812 | 2 | 191 2 2  | 0 0 | 0 0 | 0 0 | 0 0 | 11.28 |
| IPRO21818 | 2 | 15 0 0   | 0 0 | 0 0 | 0 0 | 2 2 | 47.53 |
| IPRO21819 | 2 | 65 0 0   | 0 0 | 0 0 | 0 0 | 1 0 | 36.01 |
| IPRO21821 | 2 | 14 2 2   | 0 0 | 0 0 | 0 0 | 0 0 | 39.31 |
| IPRO21827 | 2 | 107 0 0  | 0 0 | 0 0 | 0 0 | 3 3 | 10.71 |
| IPRO21832 | 2 | 113 0 0  | 0 0 | 1 0 | 0 0 | 0 0 | 30.4  |
| IPRO21834 | 2 | 162 2 2  | 0 0 | 0 0 | 0 0 | 0 0 | 8.81  |
| IPRO21840 | 2 | 88 0 0   | 0 0 | 0 0 | 0 0 | 1 1 | 9.23  |
| IPRO21844 | 2 | 58 2 2   | 0 0 | 0 0 | 0 0 | 0 0 | 41.37 |
| IPRO21845 | 2 | 103 2 2  | 0 0 | 0 0 | 0 0 | 0 0 | 52.4  |
| IPRO21848 | 2 | 138 1 1  | 0 0 | 0 0 | 0 0 | 1 1 | 21.29 |
| IPRO21858 | 2 | 172 0 0  | 0 0 | 0 0 | 0 0 | 2 2 | 8.4   |
| IPRO21870 | 2 | 22 0 0   | 0 0 | 0 0 | 1 0 | 0 0 | 69.51 |
| IPRO21872 | 2 | 48 2 2   | 0 0 | 0 0 | 0 0 | 0 0 | 49.68 |
| IPRO21876 | 2 | 12 0 0   | 0 0 | 0 0 | 0 0 | 2 2 | 26.75 |
| IPRO21878 | 2 | 119 2 1  | 1 0 | 0 0 | 0 0 | 0 0 | 18.22 |
| IPRO21881 | 2 | 51 0 0   | 0 0 | 2 2 | 0 0 | 0 0 | 55.04 |
| IPRO21900 | 2 | 31 0 0   | 0 0 | 0 0 | 0 0 | 2 2 | 35.98 |
| IPRO21901 | 2 | 55 0 0   | 0 0 | 0 0 | 0 0 | 2 2 | 43.71 |
| IPRO21909 | 2 | 57 2 2   | 0 0 | 0 0 | 0 0 | 0 0 | 29.79 |
| IPRO21911 | 2 | 64 0 0   | 0 0 | 1 0 | 1 0 | 0 0 | 44.38 |
| IPRO21922 | 2 | 49 0 0   | 0 0 | 0 0 | 0 0 | 2 2 | 51.99 |
| IPRO21934 | 2 | 21 0 0   | 0 0 | 0 0 | 0 0 | 2 2 | 35.86 |
| IPRO21935 | 2 | 44 0 0   | 0 0 | 1 0 | 0 0 | 2 1 | 29.37 |
| IPRO21948 | 2 | 31 2 2   | 0 0 | 0 0 | 0 0 | 0 0 | 53.8  |
| IPRO21973 | 2 | 48 0 0   | 0 0 | 0 0 | 0 0 | 2 2 | 26.45 |
| IPRO21989 | 2 | 12 0 0   | 0 0 | 0 0 | 0 0 | 2 2 | 61.22 |
| IPRO21990 | 2 | 31 0 0   | 0 0 | 0 0 | 0 0 | 3 3 | 42.21 |
| IPRO21994 | 2 | 148 2 2  | 0 0 | 0 0 | 0 0 | 0 0 | 7.4   |
| IPRO21996 | 2 | 6 0 0    | 0 0 | 0 0 | 0 0 | 2 2 | 74.19 |
| IPRO22005 | 2 | 9 0 0    | 0 0 | 0 0 | 0 0 | 2 2 | 86.03 |
| IPRO22007 | 2 | 20 0 0   | 0 0 | 0 0 | 0 0 | 2 2 | 52.17 |
| IPRO22017 | 2 | 49 0 0   | 0 0 | 2 2 | 0 0 | 0 0 | 13.92 |
| IPRO22025 | 2 | 84 1 1   | 0 0 | 0 0 | 0 0 | 1 1 | 12.02 |
| IPRO22032 | 2 | 33 0 0   | 0 0 | 0 0 | 0 0 | 2 2 | 39.79 |
| IPRO22042 | 2 | 54 0 0   | 0 0 | 0 0 | 0 0 | 1 1 | 29.07 |
| IPRO22055 | 2 | 32 2 2   | 0 0 | 0 0 | 0 0 | 0 0 | 80.67 |
| IPRO22056 | 2 | 36 0 0   | 0 0 | 0 0 | 0 0 | 2 2 | 52.5  |
| IPRO22074 | 2 | 58 2 2   | 0 0 | 0 0 | 0 0 | 0 0 | 29.11 |
| IPRO22075 | 2 | 50 0 0   | 0 0 | 2 1 | 0 0 | 1 0 | 43.65 |
| IPRO22077 | 2 | 10 2 2   | 0 0 | 0 0 | 0 0 | 0 0 | 54.75 |
| IPRO22102 | 2 | 65 0 0   | 0 0 | 0 0 | 0 0 | 3 3 | 39.03 |
| IPRO22106 | 2 | 26 0 0   | 0 0 | 0 0 | 0 0 | 2 2 | 72.12 |
| IPRO22122 | 2 | 71 0 0   | 0 0 | 2 1 | 0 0 | 1 0 | 23.86 |
| IPRO22123 | 2 | 68 2 2   | 0 0 | 0 0 | 0 0 | 0 0 | 24.22 |
| IPRO22143 | 2 | 65 0 0   | 0 0 | 2 2 | 0 0 | 0 0 | 36.37 |
| IPRO22159 | 2 | 60 0 0   | 0 0 | 2 0 | 0 0 | 2 0 | 36.75 |

|                 |   |          |     |     |     |     |     |       |
|-----------------|---|----------|-----|-----|-----|-----|-----|-------|
| IPRO22161       | 2 | 74 2 1   | 0 0 | 1 0 | 0 0 | 0 0 | 0 0 | 46.25 |
| IPRO22163       | 2 | 52 1 0   | 0 0 | 0 0 | 0 0 | 2 1 | 0 0 | 56.22 |
| IPRO22165       | 2 | 72 0 0   | 0 0 | 0 0 | 0 0 | 2 2 | 0 0 | 35.1  |
| IPRO22169       | 2 | 67 2 2   | 0 0 | 0 0 | 0 0 | 0 0 | 0 0 | 33.79 |
| IPRO22171       | 2 | 193 2 2  | 0 0 | 0 0 | 0 0 | 0 0 | 0 0 | 25.13 |
| IPRO22181       | 2 | 52 0 0   | 0 0 | 0 0 | 0 0 | 0 0 | 2 2 | 50.65 |
| IPRO22185       | 2 | 59 0 0   | 0 0 | 0 0 | 0 0 | 1 1 | 0 0 | 19.22 |
| IPRO22192       | 2 | 98 2 1   | 0 0 | 1 0 | 1 0 | 1 0 | 1 0 | 25.59 |
| IPRO22211       | 2 | 73 2 1   | 0 0 | 0 0 | 0 0 | 0 0 | 0 0 | 36.18 |
| IPRO22215       | 2 | 57 2 2   | 0 0 | 0 0 | 0 0 | 0 0 | 0 0 | 26.84 |
| IPRO22216       | 2 | 67 2 2   | 0 0 | 0 0 | 0 0 | 0 0 | 0 0 | 28.98 |
| IPRO22218       | 2 | 16 2 2   | 0 0 | 0 0 | 0 0 | 0 0 | 0 0 | 35.04 |
| IPRO22220       | 2 | 5 2 2    | 0 0 | 0 0 | 0 0 | 0 0 | 0 0 | 54.94 |
| IPRO22229       | 2 | 43 0 0   | 0 0 | 1 0 | 0 0 | 1 0 | 2 1 | 40.64 |
| IPRO22232       | 2 | 14 0 0   | 0 0 | 0 0 | 0 0 | 2 2 | 0 0 | 60.25 |
| IPRO22242       | 2 | 29 0 0   | 0 0 | 0 0 | 0 0 | 0 0 | 2 2 | 68.75 |
| IPRO22246       | 2 | 4 2 2    | 0 0 | 0 0 | 0 0 | 0 0 | 0 0 | 19.48 |
| IPRO22247       | 2 | 54 0 0   | 0 0 | 1 0 | 0 0 | 0 0 | 2 1 | 55.16 |
| IPRO22383       | 2 | 1378 1 0 | 1 0 | 1 0 | 1 0 | 1 0 | 2 1 | 21.81 |
| MF_00336        | 2 | 13 2 2   | 0 0 | 0 0 | 0 0 | 0 0 | 0 0 | 27.03 |
| PD038969        | 2 | 8 0 0    | 2 2 | 0 0 | 0 0 | 0 0 | 0 0 | 75.78 |
| PD48683         | 2 | 50 1 1   | 1 1 | 0 0 | 0 0 | 0 0 | 0 0 | 31.33 |
| PF00256         | 2 | 39 1 1   | 0 0 | 0 0 | 0 0 | 0 0 | 0 0 | 38.51 |
| PF01162         | 2 | 747 2 0  | 3 1 | 2 0 | 0 0 | 2 0 | 2 0 | 40.29 |
| PF01305         | 2 | 50 2 2   | 0 0 | 0 0 | 0 0 | 0 0 | 0 0 | 42.76 |
| PF01306         | 2 | 125 0 0  | 0 0 | 0 0 | 0 0 | 0 0 | 2 2 | 32.48 |
| PF01745         | 2 | 22 1 1   | 0 0 | 1 0 | 0 0 | 0 0 | 0 0 | 36.56 |
| PF01828         | 2 | 56 1 1   | 0 0 | 0 0 | 0 0 | 1 1 | 0 0 | 39.48 |
| PF01851         | 2 | 455 0 0  | 0 0 | 1 1 | 0 0 | 1 1 | 0 0 | 18.8  |
| PF02030         | 2 | 5 2 2    | 0 0 | 0 0 | 0 0 | 0 0 | 0 0 | 32.76 |
| PF02078         | 2 | 56 0 0   | 0 0 | 0 0 | 0 0 | 0 0 | 2 2 | 58.35 |
| PF02363         | 2 | 832 0 0  | 0 0 | 1 1 | 0 0 | 1 1 | 0 0 | 47.31 |
| PF02750         | 2 | 70 0 0   | 0 0 | 0 0 | 0 0 | 2 0 | 2 2 | 56.83 |
| PF02935         | 2 | 66 0 0   | 0 0 | 0 0 | 0 0 | 0 0 | 2 2 | 33.54 |
| PF03128         | 2 | 30 0 0   | 0 0 | 0 0 | 0 0 | 0 0 | 2 2 | 63.05 |
| PF03424         | 2 | 4 2 2    | 0 0 | 0 0 | 0 0 | 0 0 | 0 0 | 44.34 |
| PF03535         | 2 | 16 1 1   | 0 0 | 0 0 | 0 0 | 0 0 | 1 1 | 49.35 |
| PF03651         | 2 | 57 0 0   | 0 0 | 1 1 | 0 0 | 0 0 | 0 0 | 41.91 |
| PF03667         | 2 | 65 2 2   | 0 0 | 0 0 | 0 0 | 0 0 | 0 0 | 51.62 |
| PF03825         | 2 | 274 0 0  | 0 0 | 0 0 | 0 0 | 0 0 | 2 2 | 18.19 |
| PF04044         | 2 | 4 0 0    | 0 0 | 0 0 | 0 0 | 0 0 | 2 2 | 38.91 |
| PF04237         | 2 | 361 2 2  | 0 0 | 0 0 | 0 0 | 0 0 | 0 0 | 16.61 |
| PF04257         | 2 | 347 1 1  | 0 0 | 1 1 | 0 0 | 0 0 | 0 0 | 19.02 |
| PF04271         | 2 | 24 2 2   | 0 0 | 0 0 | 0 0 | 0 0 | 0 0 | 45.57 |
| PF04641         | 2 | 137 0 0  | 0 0 | 1 0 | 1 0 | 1 0 | 2 1 | 20.07 |
| PF04681         | 2 | 37 0 0   | 0 0 | 0 0 | 0 0 | 2 2 | 0 0 | 35.35 |
| PF04703         | 2 | 33 2 2   | 0 0 | 0 0 | 0 0 | 0 0 | 0 0 | 23.88 |
| PF05119         | 2 | 174 2 2  | 0 0 | 0 0 | 0 0 | 0 0 | 0 0 | 11.37 |
| PF05205         | 2 | 59 0 0   | 0 0 | 0 0 | 0 0 | 0 0 | 3 3 | 26.76 |
| PF05206         | 2 | 62 0 0   | 0 0 | 2 0 | 1 0 | 3 1 | 0 0 | 25.76 |
| PF05622         | 2 | 95 0 0   | 0 0 | 0 0 | 0 0 | 1 1 | 4 4 | 22.74 |
| PF05682         | 2 | 97 0 0   | 0 0 | 0 0 | 0 0 | 0 0 | 1 1 | 39.27 |
| PF05827         | 2 | 57 0 0   | 0 0 | 0 0 | 0 0 | 0 0 | 2 2 | 37.66 |
| PF05909         | 2 | 73 0 0   | 0 0 | 1 1 | 0 0 | 0 0 | 1 1 | 35.66 |
| PF05920         | 2 | 29 0 0   | 0 0 | 0 0 | 0 0 | 1 1 | 1 1 | 34.89 |
| PF06027         | 2 | 119 0 0  | 0 0 | 2 2 | 0 0 | 0 0 | 0 0 | 27.28 |
| PF06176         | 2 | 47 0 0   | 0 0 | 2 2 | 0 0 | 0 0 | 0 0 | 56.16 |
| PF06276         | 2 | 161 2 1  | 0 0 | 0 0 | 0 0 | 1 0 | 0 0 | 19.15 |
| PF06495         | 2 | 24 0 0   | 0 0 | 0 0 | 0 0 | 0 0 | 2 2 | 57.34 |
| PF06500         | 2 | 140 2 2  | 0 0 | 0 0 | 0 0 | 0 0 | 0 0 | 26.65 |
| PF06544         | 2 | 43 0 0   | 0 0 | 0 0 | 2 1 | 0 0 | 1 0 | 29.22 |
| PF07015         | 2 | 35 2 0   | 2 0 | 0 0 | 0 0 | 2 0 | 0 0 | 32.63 |
| PF07464         | 2 | 10 2 2   | 0 0 | 0 0 | 0 0 | 0 0 | 0 0 | 18.9  |
| PF07466         | 2 | 99 1 1   | 0 0 | 0 0 | 0 0 | 0 0 | 1 1 | 21.89 |
| PF07798         | 2 | 114 0 0  | 0 0 | 0 0 | 0 0 | 1 1 | 0 0 | 24.32 |
| PF07814         | 2 | 65 0 0   | 0 0 | 1 1 | 0 0 | 0 0 | 1 1 | 18.73 |
| PF08215         | 2 | 61 0 0   | 0 0 | 0 0 | 1 1 | 1 1 | 0 0 | 32.47 |
| PF08320         | 2 | 24 0 0   | 0 0 | 0 0 | 0 0 | 0 0 | 2 2 | 27.4  |
| PF08683         | 2 | 47 0 0   | 0 0 | 0 0 | 0 0 | 0 0 | 2 2 | 49.01 |
| PF09054         | 2 | 31 3 1   | 2 0 | 0 0 | 0 0 | 0 0 | 0 0 | 37.84 |
| PF09091         | 2 | 5 0 0    | 0 0 | 0 0 | 0 0 | 1 0 | 2 1 | 23.68 |
| PF09664         | 2 | 43 1 1   | 1 1 | 0 0 | 0 0 | 0 0 | 0 0 | 15.48 |
| PF10029         | 2 | 95 2 2   | 0 0 | 0 0 | 0 0 | 0 0 | 0 0 | 26.96 |
| PF10478         | 2 | 19 0 0   | 0 0 | 0 0 | 0 0 | 0 0 | 2 2 | 35.50 |
| PF10508         | 2 | 59 0 0   | 0 0 | 1 1 | 0 0 | 0 0 | 1 1 | 14.72 |
| PF10586         | 2 | 126 0 0  | 0 0 | 2 0 | 0 0 | 2 0 | 2 0 | 65.8  |
| PF10594         | 2 | 128 0 0  | 0 0 | 2 0 | 0 0 | 2 0 | 2 0 | 71.08 |
| PF10644         | 2 | 63 0 0   | 0 0 | 1 0 | 0 0 | 1 0 | 2 1 | 33.41 |
| PF10662         | 2 | 123 1 1  | 0 0 | 1 1 | 0 0 | 0 0 | 0 0 | 35.72 |
| PF10914         | 2 | 66 0 0   | 0 0 | 0 0 | 0 0 | 2 2 | 0 0 | 16.75 |
| PF11029         | 2 | 30 0 0   | 0 0 | 0 0 | 0 0 | 0 0 | 2 2 | 38.52 |
| PF11103         | 2 | 96 2 2   | 0 0 | 0 0 | 0 0 | 0 0 | 0 0 | 42.51 |
| PF11144         | 2 | 28 0 0   | 0 0 | 0 0 | 0 0 | 0 0 | 2 2 | 29.86 |
| PF11339         | 2 | 72 2 2   | 0 0 | 0 0 | 0 0 | 0 0 | 0 0 | 39.26 |
| PF11409         | 2 | 21 0 0   | 0 0 | 0 0 | 0 0 | 2 2 | 0 0 | 77.89 |
| PF11538         | 2 | 13 0 0   | 0 0 | 0 0 | 0 0 | 0 0 | 2 2 | 48.64 |
| PF11563         | 2 | 23 2 2   | 0 0 | 0 0 | 0 0 | 0 0 | 0 0 | 35.56 |
| PF11620         | 2 | 27 0 0   | 0 0 | 0 0 | 0 0 | 0 0 | 2 2 | 56.98 |
| PF11629         | 2 | 36 0 0   | 0 0 | 0 0 | 0 0 | 0 0 | 2 2 | 62.67 |
| PF11643         | 2 | 28 0 0   | 0 0 | 0 0 | 0 0 | 0 0 | 2 2 | 58.38 |
| PF11700         | 2 | 319 2 2  | 0 0 | 0 0 | 1 1 | 0 0 | 0 0 | 14.52 |
| PF11701         | 2 | 56 0 0   | 0 0 | 0 0 | 0 0 | 3 3 | 1 1 | 22.59 |
| PF11775         | 2 | 14 2 2   | 0 0 | 0 0 | 0 0 | 0 0 | 0 0 | 15.05 |
| PF11779         | 2 | 91 0 0   | 0 0 | 0 0 | 0 0 | 0 0 | 2 2 | 27.54 |
| PF11796         | 2 | 6 2 2    | 0 0 | 0 0 | 0 0 | 0 0 | 0 0 | 24.41 |
| PF11798         | 2 | 10 2 2   | 0 0 | 0 0 | 0 0 | 0 0 | 0 0 | 39.23 |
| PF11799         | 2 | 56 2 1   | 0 0 | 1 0 | 0 0 | 1 0 | 0 0 | 18.41 |
| PF11856         | 2 | 33 2 2   | 0 0 | 0 0 | 0 0 | 0 0 | 0 0 | 11.07 |
| PF11861         | 2 | 68 0 0   | 0 0 | 2 0 | 2 0 | 2 0 | 2 0 | 34.14 |
| PF11864         | 2 | 58 0 0   | 0 0 | 0 0 | 0 0 | 2 0 | 2 0 | 23.94 |
| PF11897         | 2 | 150 2 1  | 1 0 | 0 0 | 0 0 | 0 0 | 0 0 | 32.32 |
| PF11965         | 2 | 132 1 0  | 0 0 | 0 0 | 2 1 | 0 0 | 0 0 | 30.02 |
| PF11979         | 2 | 32 0 0   | 0 0 | 0 0 | 0 0 | 0 0 | 2 2 | 49.16 |
| PF12063         | 2 | 69 0 0   | 0 0 | 2 0 | 0 0 | 2 0 | 2 0 | 23.7  |
| PF12202         | 2 | 72 0 0   | 0 0 | 0 0 | 0 0 | 0 0 | 2 2 | 42.07 |
| PF12203         | 2 | 33 0 0   | 0 0 | 0 0 | 0 0 | 0 0 | 2 2 | 79.64 |
| PF12330         | 2 | 56 0 0   | 0 0 | 0 0 | 0 0 | 0 0 | 1 1 | 26.38 |
| PF12352         | 2 | 130 0 0  | 0 0 | 1 0 | 1 0 | 1 0 | 2 1 | 31.56 |
| PF12357         | 2 | 101 0 0  | 0 0 | 2 2 | 0 0 | 0 0 | 0 0 | 47.87 |
| PF12430         | 2 | 59 0 0   | 0 0 | 2 1 | 1 0 | 1 0 | 1 0 | 40.79 |
| PF12445         | 2 | 17 2 2   | 0 0 | 0 0 | 0 0 | 0 0 | 0 0 | 30.28 |
| PF12460         | 2 | 59 0 0   | 0 0 | 1 0 | 0 0 | 2 1 | 1 0 | 23.98 |
| PF12500         | 2 | 47 2 2   | 0 0 | 0 0 | 0 0 | 0 0 | 0 0 | 24.36 |
| PF12529         | 2 | 36 0 0   | 0 0 | 0 0 | 0 0 | 0 0 | 2 2 | 44.53 |
| PF12533         | 2 | 39 0 0   | 0 0 | 0 0 | 0 0 | 0 0 | 2 2 | 44.97 |
| PF12544         | 2 | 146 2 1  | 1 0 | 0 0 | 0 0 | 0 0 | 0 0 | 43.6  |
| PF12577         | 2 | 23 0 0   | 0 0 | 0 0 | 0 0 | 0 0 | 2 2 | 81.58 |
| PF12592         | 2 | 65 2 2   | 0 0 | 0 0 | 0 0 | 0 0 | 0 0 | 48.23 |
| PF12613         | 2 | 17 2 2   | 0 0 | 0 0 | 0 0 | 0 0 | 0 0 | 64.93 |
| PF12615         | 2 | 41 2 2   | 0 0 | 0 0 | 0 0 | 0 0 | 0 0 | 21.47 |
| PTHR10000       | 2 | 38 2 2   | 0 0 | 0 0 | 0 0 | 0 0 | 0 0 | 15.66 |
| PTHR10032-SF67  | 2 | 27 0 0   | 0 0 | 0 0 | 0 0 | 0 0 | 2 2 | 55.09 |
| PTHR10032-SF71  | 2 | 8 0 0    | 0 0 | 0 0 | 0 0 | 0 0 | 2 2 | 41.47 |
| PTHR10046       | 2 | 24 2 2   | 0 0 | 0 0 | 0 0 | 0 0 | 0 0 | 25.71 |
| PTHR10050       | 2 | 25 2 2   | 0 0 | 0 0 | 0 0 | 0 0 | 0 0 | 23.52 |
| PTHR10066-SF9   | 2 | 5 0 0    | 0 0 | 0 0 | 0 0 | 2 2 | 0 0 | 64.99 |
| PTHR10074       | 2 | 52 0 0   | 0 0 | 0 0 | 0 0 | 2 2 | 0 0 | 6.08  |
| PTHR10083-SF14  | 2 | 5 2 2    | 0 0 | 0 0 | 0 0 | 0 0 | 0 0 | 21.8  |
| PTHR10161       | 2 | 12 2 1   | 0 0 | 0 0 | 1 0 | 0 0 | 0 0 | 17.62 |
| PTHR10166       | 2 | 14 1 1   | 0 0 | 0 0 | 0 0 | 0 0 | 1 1 | 25.79 |
| PTHR10168       | 2 | 48 1 1   | 0 0 | 0 0 | 0 0 | 0 0 | 0 0 | 39.59 |
| PTHR10185       | 2 | 10 2 2   | 0 0 | 0 0 | 0 0 | 0 0 | 0 0 | 44.18 |
| PTHR10194       | 2 | 4 0 0    | 0 0 | 0 0 | 0 0 | 1 1 | 1 1 | 5.31  |
| PTHR10342       | 2 | 22 2 1   | 0 0 | 0 0 | 0 0 | 1 0 | 0 0 | 51.58 |
| PTHR10343-SF10  | 2 | 37 1 1   | 0 0 | 1 1 | 0 0 | 0 0 | 0 0 | 31.14 |
| PTHR10351       | 2 | 9 0 0    | 0 0 | 0 0 | 0 0 | 1 1 | 1 1 | 34.35 |
| PTHR10357       | 2 | 14 2 1   | 0 0 | 0 0 | 0 0 | 0 0 | 0 0 | 13.33 |
| PTHR10366       | 2 | 88 0 0   | 0 0 | 2 2 | 0 0 | 0 0 | 0 0 | 7.36  |
| PTHR10366-SF9   | 2 | 50 0 0   | 0 0 | 2 2 | 0 0 | 0 0 | 0 0 | 16.46 |
| PTHR10483       | 2 | 154 0 0  | 0 0 | 1 0 | 1 1 | 1 0 | 0 0 | 2.63  |
| PTHR10492       | 2 | 80 0 0   | 0 0 | 2 2 | 0 0 | 0 0 | 0 0 | 25.38 |
| PTHR10499-SF96  | 2 | 4 2 2    | 0 0 | 0 0 | 0 0 | 0 0 | 0 0 | 95.33 |
| PTHR10529-SF6   | 2 | 26 1 0   | 0 0 | 0 0 | 0 0 | 1 0 | 0 0 | 22.79 |
| PTHR10588-SF26  | 2 | 26 0 0   | 0 0 | 0 0 | 1 1 | 0 0 | 1 1 | 41.43 |
| PTHR10596-SF115 | 2 | 13 2 2   | 0 0 | 0 0 | 0 0 | 0 0 | 0 0 | 25.29 |
| PTHR10617-SF9   | 2 | 7 1 0    | 1 1 | 1 0 | 0 0 | 0 0 | 0 0 | 54.16 |
| PTHR10648       | 2 | 14 0 0   | 0 0 | 0 0 | 1 0 | 0 0 | 2 1 | 11.01 |

|                 |   |         |     |     |     |     |     |       |
|-----------------|---|---------|-----|-----|-----|-----|-----|-------|
| PTHR10661       | 2 | 4 0 0   | 0 0 | 0 0 | 0 0 | 0 0 | 1 1 | 16.22 |
| PTHR10663       | 2 | 6 0 0   | 0 0 | 0 0 | 0 0 | 0 0 | 2 2 | 50.1  |
| PTHR10676       | 2 | 19 0 0  | 0 0 | 0 0 | 0 0 | 1 1 | 0 0 | 20.47 |
| PTHR10725       | 2 | 12 0 0  | 0 0 | 0 0 | 0 0 | 0 0 | 2 2 | 19.71 |
| PTHR10742-SF33  | 2 | 4 0 0   | 2 2 | 0 0 | 0 0 | 0 0 | 0 0 | 62.01 |
| PTHR10782       | 2 | 8 0 0   | 0 0 | 2 1 | 0 0 | 0 0 | 1 0 | 13.78 |
| PTHR10827-SF13  | 2 | 26 1 0  | 0 0 | 1 0 | 0 0 | 0 0 | 1 1 | 28.25 |
| PTHR10887-SF10  | 2 | 45 0 0  | 0 0 | 0 0 | 1 1 | 1 1 | 0 0 | 23.73 |
| PTHR10907       | 2 | 11 2 2  | 0 0 | 0 0 | 0 0 | 0 0 | 0 0 | 23.21 |
| PTHR10937       | 2 | 15 2 2  | 0 0 | 0 0 | 0 0 | 0 0 | 0 0 | 14.86 |
| PTHR10953-SF4   | 2 | 9 2 2   | 0 0 | 0 0 | 0 0 | 0 0 | 0 0 | 16.61 |
| PTHR10967       | 2 | 10 0 0  | 0 0 | 0 0 | 1 1 | 0 0 | 1 1 | 8.39  |
| PTHR11014       | 2 | 17 1 1  | 0 0 | 1 1 | 0 0 | 0 0 | 0 0 | 27.19 |
| PTHR11061       | 2 | 5 1 1   | 0 0 | 1 1 | 0 0 | 0 0 | 0 0 | 14.54 |
| PTHR11089       | 2 | 14 0 0  | 0 0 | 0 0 | 0 0 | 2 2 | 0 0 | 13.25 |
| PTHR11219       | 2 | 11 2 2  | 0 0 | 0 0 | 0 0 | 0 0 | 0 0 | 15.98 |
| PTHR11227       | 2 | 28 0 0  | 0 0 | 2 2 | 0 0 | 0 0 | 0 0 | 24.96 |
| PTHR11246       | 2 | 29 0 0  | 0 0 | 2 1 | 1 0 | 1 0 | 1 0 | 19.08 |
| PTHR11246-SF1   | 2 | 10 0 0  | 0 0 | 1 0 | 2 1 | 0 0 | 1 0 | 25.65 |
| PTHR11472       | 2 | 3 2 2   | 0 0 | 0 0 | 0 0 | 0 0 | 0 0 | 69.88 |
| PTHR11524       | 2 | 19 0 0  | 0 0 | 2 2 | 0 0 | 0 0 | 0 0 | 32.13 |
| PTHR11550       | 2 | 31 1 1  | 0 0 | 1 1 | 0 0 | 0 0 | 0 0 | 67.58 |
| PTHR11552       | 2 | 8 2 1   | 0 0 | 0 0 | 0 0 | 1 0 | 0 0 | 5.91  |
| PTHR11711-SF4   | 2 | 5 0 0   | 0 0 | 0 0 | 0 0 | 2 2 | 0 0 | 58.42 |
| PTHR11731-SF7   | 2 | 13 2 2  | 0 0 | 0 0 | 0 0 | 0 0 | 0 0 | 13.73 |
| PTHR11850       | 2 | 7 0 0   | 0 0 | 1 1 | 0 0 | 0 0 | 1 1 | 17.12 |
| PTHR11865       | 2 | 4 0 0   | 0 0 | 1 1 | 0 0 | 0 0 | 0 0 | 23.18 |
| PTHR11905       | 2 | 5 1 1   | 0 0 | 0 0 | 0 0 | 1 1 | 0 0 | 9.89  |
| PTHR11921       | 2 | 257 2 2 | 0 0 | 0 0 | 0 0 | 0 0 | 0 0 | 24.05 |
| PTHR11926-SF2   | 2 | 18 1 0  | 0 0 | 0 0 | 0 0 | 2 1 | 0 0 | 18.63 |
| PTHR11938-SF9   | 2 | 7 2 2   | 0 0 | 0 0 | 0 0 | 0 0 | 0 0 | 21.41 |
| PTHR11939-SF35  | 2 | 7 2 2   | 0 0 | 0 0 | 0 0 | 0 0 | 0 0 | 12.36 |
| PTHR11945-SF36  | 2 | 5 0 0   | 0 0 | 2 2 | 0 0 | 2 0 | 0 0 | 50.4  |
| PTHR11952-SF2   | 2 | 10 0 0  | 0 0 | 2 2 | 0 0 | 0 0 | 0 0 | 14.84 |
| PTHR12143       | 2 | 3 2 2   | 0 0 | 0 0 | 0 0 | 0 0 | 0 0 | 44.58 |
| PTHR12145       | 2 | 11 1 1  | 1 1 | 0 0 | 0 0 | 0 0 | 0 0 | 16.06 |
| PTHR12187       | 2 | 7 0 0   | 0 0 | 0 0 | 0 0 | 0 0 | 2 2 | 24.5  |
| PTHR12247       | 2 | 7 0 0   | 0 0 | 0 0 | 0 0 | 2 2 | 0 0 | 45.35 |
| PTHR12294       | 2 | 11 0 0  | 0 0 | 0 0 | 2 1 | 0 0 | 1 0 | 25.99 |
| PTHR12380       | 2 | 13 0 0  | 0 0 | 0 0 | 0 0 | 2 2 | 0 0 | 25.8  |
| PTHR12380-SF8   | 2 | 3 0 0   | 0 0 | 0 0 | 0 0 | 2 2 | 0 0 | 48.62 |
| PTHR12451       | 2 | 36 0 0  | 0 0 | 0 0 | 0 0 | 0 0 | 1 1 | 43.94 |
| PTHR12506-SF8   | 2 | 7 0 0   | 0 0 | 0 0 | 0 0 | 1 1 | 1 1 | 54.68 |
| PTHR12553       | 2 | 27 2 2  | 0 0 | 0 0 | 0 0 | 0 0 | 0 0 | 14.8  |
| PTHR12553-SF6   | 2 | 33 2 2  | 0 0 | 0 0 | 0 0 | 0 0 | 0 0 | 21.61 |
| PTHR12558-SF9   | 2 | 9 0 0   | 0 0 | 0 0 | 2 0 | 2 0 | 0 0 | 25.66 |
| PTHR12596       | 2 | 23 0 0  | 0 0 | 2 1 | 0 0 | 0 0 | 1 0 | 49.9  |
| PTHR12596-SF2   | 2 | 32 0 0  | 0 0 | 1 0 | 0 0 | 0 0 | 2 1 | 32.04 |
| PTHR12616       | 2 | 9 0 0   | 0 0 | 1 1 | 0 0 | 1 1 | 0 0 | 14.33 |
| PTHR12706       | 2 | 95 1 1  | 0 0 | 1 1 | 0 0 | 0 0 | 0 0 | 36.1  |
| PTHR12725       | 2 | 23 2 2  | 0 0 | 0 0 | 0 0 | 0 0 | 0 0 | 11.83 |
| PTHR12891       | 2 | 68 0 0  | 0 0 | 1 0 | 0 0 | 1 0 | 1 0 | 23.79 |
| PTHR12902       | 2 | 66 0 0  | 0 0 | 1 1 | 0 0 | 0 0 | 0 0 | 25.82 |
| PTHR12958       | 2 | 26 0 0  | 0 0 | 0 0 | 0 0 | 0 0 | 2 2 | 37.61 |
| PTHR13063       | 2 | 7 0 0   | 0 0 | 0 0 | 0 0 | 1 1 | 0 0 | 38.63 |
| PTHR13366       | 2 | 33 0 0  | 0 0 | 1 1 | 0 0 | 1 1 | 0 0 | 28.81 |
| PTHR13384       | 2 | 16 0 0  | 0 0 | 0 0 | 2 2 | 2 2 | 0 0 | 48.87 |
| PTHR13384-SF1   | 2 | 25 0 0  | 0 0 | 0 0 | 0 0 | 2 2 | 0 0 | 41.79 |
| PTHR13593       | 2 | 41 1 1  | 0 0 | 0 0 | 0 0 | 0 0 | 0 0 | 23.1  |
| PTHR13681       | 2 | 10 0 0  | 0 0 | 1 0 | 0 0 | 1 0 | 2 1 | 43.49 |
| PTHR13712-SF8   | 2 | 5 2 2   | 0 0 | 0 0 | 0 0 | 0 0 | 0 0 | 45.33 |
| PTHR13806       | 2 | 13 1 1  | 0 0 | 0 0 | 0 0 | 0 0 | 1 1 | 37.31 |
| PTHR13824-SF29  | 2 | 35 0 0  | 0 0 | 0 0 | 0 0 | 1 1 | 0 0 | 15.58 |
| PTHR13871-SF2   | 2 | 28 0 0  | 0 0 | 2 2 | 0 0 | 0 0 | 0 0 | 39.17 |
| PTHR14027       | 2 | 10 2 2  | 0 0 | 0 0 | 0 0 | 0 0 | 0 0 | 19.43 |
| PTHR14167       | 2 | 4 0 0   | 0 0 | 0 0 | 0 0 | 0 0 | 2 2 | 57.56 |
| PTHR14344       | 2 | 13 0 0  | 0 0 | 0 0 | 2 0 | 2 0 | 0 0 | 40.08 |
| PTHR14738       | 2 | 31 0 0  | 0 0 | 0 0 | 0 0 | 1 1 | 1 1 | 44.19 |
| PTHR14919       | 2 | 3 0 0   | 0 0 | 1 0 | 0 0 | 0 0 | 2 1 | 18.56 |
| PTHR15032       | 2 | 13 1 1  | 0 0 | 0 0 | 0 0 | 0 0 | 1 1 | 27.15 |
| PTHR15140       | 2 | 55 0 0  | 0 0 | 1 0 | 1 0 | 2 1 | 0 0 | 27.74 |
| PTHR15180       | 2 | 22 0 0  | 0 0 | 0 0 | 0 0 | 0 0 | 2 2 | 35.52 |
| PTHR15201       | 2 | 15 0 0  | 0 0 | 0 0 | 0 0 | 2 2 | 0 0 | 29.94 |
| PTHR15491-SF1   | 2 | 11 0 0  | 0 0 | 0 0 | 0 0 | 0 0 | 2 2 | 78.44 |
| PTHR15555       | 2 | 11 0 0  | 0 0 | 1 1 | 0 0 | 0 0 | 1 1 | 35.09 |
| PTHR15722       | 2 | 15 0 0  | 0 0 | 0 0 | 0 0 | 0 0 | 1 1 | 25.5  |
| PTHR15722-SF2   | 2 | 10 0 0  | 0 0 | 2 1 | 1 0 | 0 0 | 1 0 | 46.92 |
| PTHR15722-SF7   | 2 | 18 0 0  | 0 0 | 0 0 | 0 0 | 0 0 | 2 2 | 54.91 |
| PTHR15904       | 2 | 12 0 0  | 0 0 | 0 0 | 0 0 | 2 2 | 0 0 | 42.14 |
| PTHR16091       | 2 | 19 0 0  | 0 0 | 0 0 | 0 0 | 0 0 | 2 2 | 42.59 |
| PTHR17204       | 2 | 10 0 0  | 0 0 | 0 0 | 0 0 | 0 0 | 2 2 | 57.74 |
| PTHR17204-SF9   | 2 | 7 0 0   | 0 0 | 0 0 | 0 0 | 0 0 | 2 2 | 61.2  |
| PTHR17614       | 2 | 12 0 0  | 0 0 | 1 0 | 0 0 | 0 0 | 2 1 | 31.83 |
| PTHR18763       | 2 | 18 0 0  | 0 0 | 0 0 | 0 0 | 0 0 | 1 1 | 45.41 |
| PTHR18806       | 2 | 8 0 0   | 0 0 | 0 0 | 2 2 | 0 0 | 1 2 | 35.15 |
| PTHR18934       | 2 | 41 0 0  | 0 0 | 0 0 | 1 1 | 0 0 | 1 1 | 18.08 |
| PTHR18937-SF13  | 2 | 16 1 1  | 1 1 | 0 0 | 0 0 | 0 0 | 0 0 | 7.9   |
| PTHR18964-SF37  | 2 | 10 2 2  | 0 0 | 0 0 | 0 0 | 0 0 | 0 0 | 25.43 |
| PTHR19241       | 2 | 9 1 1   | 0 0 | 1 1 | 0 0 | 0 0 | 0 0 | 20.35 |
| PTHR19264       | 2 | 16 0 0  | 0 0 | 0 0 | 0 0 | 0 0 | 2 2 | 4.83  |
| PTHR19269       | 2 | 12 0 0  | 0 0 | 0 0 | 0 0 | 2 2 | 0 0 | 35.71 |
| PTHR19304-SF4   | 2 | 11 0 0  | 0 0 | 0 0 | 0 0 | 0 0 | 2 2 | 64.91 |
| PTHR19432-SF5   | 2 | 17 0 0  | 0 0 | 0 0 | 0 0 | 0 0 | 2 2 | 41.21 |
| PTHR19446-SF100 | 2 | 168 0 0 | 0 0 | 0 0 | 0 0 | 0 0 | 2 2 | 4.33  |
| PTHR19446-SF97  | 2 | 105 0 0 | 0 0 | 2 2 | 0 0 | 0 0 | 0 0 | 20.59 |
| PTHR19818       | 2 | 12 0 0  | 0 0 | 0 0 | 1 0 | 2 1 | 0 0 | 32.23 |
| PTHR19818-SF9   | 2 | 23 0 0  | 0 0 | 0 0 | 0 0 | 1 0 | 2 1 | 52.2  |
| PTHR19845       | 2 | 10 1 1  | 0 0 | 1 1 | 0 0 | 0 0 | 0 0 | 11.84 |
| PTHR19852       | 2 | 10 1 1  | 0 0 | 0 0 | 0 0 | 0 0 | 1 1 | 28.63 |
| PTHR19852-SF8   | 2 | 35 1 1  | 0 0 | 0 0 | 0 0 | 0 0 | 1 1 | 15.34 |
| PTHR19861       | 2 | 7 2 2   | 0 0 | 0 0 | 0 0 | 0 0 | 0 0 | 31.84 |
| PTHR19991       | 2 | 12 0 0  | 0 0 | 0 0 | 0 0 | 2 2 | 0 0 | 57.53 |
| PTHR20920       | 2 | 11 0 0  | 0 0 | 0 0 | 0 0 | 0 0 | 2 2 | 49.27 |
| PTHR20936       | 2 | 17 0 0  | 0 0 | 0 0 | 0 0 | 0 0 | 2 2 | 35.39 |
| PTHR20963       | 2 | 14 2 2  | 0 0 | 0 0 | 0 0 | 0 0 | 0 0 | 81.74 |
| PTHR21079       | 2 | 4 0 0   | 0 0 | 0 0 | 0 0 | 0 0 | 2 2 | 33.9  |
| PTHR21136       | 2 | 11 0 0  | 0 0 | 2 2 | 0 0 | 0 0 | 0 0 | 20.84 |
| PTHR21148-SF11  | 2 | 22 0 0  | 0 0 | 2 2 | 0 0 | 0 0 | 0 0 | 34.01 |
| PTHR21174       | 2 | 19 1 1  | 0 0 | 0 0 | 1 1 | 0 0 | 0 0 | 46.19 |
| PTHR21261       | 2 | 111 0 0 | 0 0 | 0 0 | 0 0 | 0 0 | 2 2 | 36.52 |
| PTHR21290       | 2 | 44 0 0  | 0 0 | 0 0 | 0 0 | 0 0 | 2 2 | 26.03 |
| PTHR21391       | 2 | 71 0 0  | 0 0 | 0 0 | 0 0 | 0 0 | 2 2 | 38.36 |
| PTHR21404       | 2 | 51 2 0  | 0 0 | 0 0 | 0 0 | 1 0 | 1 0 | 44.41 |
| PTHR21478       | 2 | 12 0 0  | 0 0 | 0 0 | 0 0 | 0 0 | 2 2 | 55.29 |
| PTHR21483       | 2 | 8 0 0   | 0 0 | 2 2 | 0 0 | 0 0 | 0 0 | 41.04 |
| PTHR21497       | 2 | 18 0 0  | 0 0 | 1 0 | 0 0 | 0 0 | 2 1 | 38.33 |
| PTHR21497-SF1   | 2 | 9 0 0   | 0 0 | 1 0 | 0 0 | 0 0 | 2 1 | 39.6  |
| PTHR21512       | 2 | 6 0 0   | 0 0 | 0 0 | 0 0 | 2 2 | 0 0 | 26.18 |
| PTHR21541       | 2 | 23 0 0  | 0 0 | 0 0 | 0 0 | 0 0 | 2 2 | 39.63 |
| PTHR21568       | 2 | 47 0 0  | 1 1 | 1 1 | 0 0 | 0 0 | 0 0 | 31.89 |
| PTHR21572       | 2 | 82 0 0  | 0 0 | 0 0 | 0 0 | 0 0 | 2 2 | 31.4  |
| PTHR21576-SF2   | 2 | 4 0 0   | 0 0 | 1 1 | 1 1 | 0 0 | 0 0 | 20.66 |
| PTHR21601       | 2 | 14 0 0  | 0 0 | 0 0 | 0 0 | 2 2 | 0 0 | 19.14 |
| PTHR21636-SF1   | 2 | 3 0 0   | 0 0 | 0 0 | 0 0 | 0 0 | 2 2 | 66.29 |
| PTHR21666-SF1   | 2 | 4 2 2   | 0 0 | 0 0 | 0 0 | 0 0 | 0 0 | 28.54 |
| PTHR21726       | 2 | 39 0 0  | 0 0 | 2 2 | 0 0 | 0 0 | 0 0 | 23.34 |
| PTHR21737       | 2 | 4 0 0   | 0 0 | 1 1 | 0 0 | 0 0 | 1 1 | 32.13 |
| PTHR22143       | 2 | 4 0 0   | 0 0 | 0 0 | 0 0 | 0 0 | 2 2 | 66.79 |
| PTHR22522       | 2 | 18 0 0  | 0 0 | 0 0 | 0 0 | 0 0 | 2 2 | 70.71 |
| PTHR22550       | 2 | 19 2 2  | 0 0 | 0 0 | 0 0 | 0 0 | 0 0 | 22.05 |
| PTHR22572-SF17  | 2 | 85 1 1  | 0 0 | 1 1 | 0 0 | 0 0 | 0 0 | 32.02 |
| PTHR22605       | 2 | 8 0 0   | 0 0 | 0 0 | 0 0 | 2 2 | 0 0 | 24.91 |
| PTHR22620       | 2 | 28 0 0  | 0 0 | 0 0 | 0 0 | 0 0 | 2 2 | 45.48 |
| PTHR22635       | 2 | 5 0 0   | 0 0 | 0 0 | 0 0 | 0 0 | 2 2 | 59.86 |
| PTHR22642       | 2 | 95 2 0  | 1 0 | 1 0 | 0 0 | 2 0 | 1 0 | 29.45 |
| PTHR22683       | 2 | 19 2 2  | 0 0 | 0 0 | 0 0 | 0 0 | 0 0 | 30.06 |
| PTHR22683-SF30  | 2 | 20 2 2  | 0 0 | 0 0 | 0 0 | 0 0 | 0 0 | 36.23 |
| PTHR22724       | 2 | 18 0 0  | 0 0 | 0 0 | 0 0 | 0 0 | 2 2 | 47.99 |
| PTHR22724-SF1   | 2 | 3 0 0   | 0 0 | 0 0 | 0 0 | 0 0 | 2 2 | 65.6  |
| PTHR22766       | 2 | 8 0 0   | 0 0 | 1 1 | 0 0 | 1 1 | 0 0 | 26.86 |
| PTHR22895       | 2 | 24 0 0  | 0 0 | 1 1 | 0 0 | 0 0 | 1 1 | 36.82 |
| PTHR22908-SF4   | 2 | 7 0 0   | 0 0 | 0 0 | 0 0 | 0 0 | 2 2 | 38.7  |
| PTHR22970       | 2 | 5 0 0   | 0 0 | 0 0 | 0 0 | 2 2 | 0 0 | 35.21 |
| PTHR23036-SF29  | 2 | 3 0 0   | 0 0 | 0 0 | 0 0 | 0 0 | 2 2 | 62.55 |
| PTHR23056       | 2 | 64 0 0  | 0 0 | 2 1 | 0 0 | 0 0 | 1 0 | 23.26 |
| PTHR23083-SF10  | 2 | 20 2 2  | 0 0 | 0 0 | 0 0 | 0 0 | 0 0 | 30.22 |
| PTHR23083-SF21  | 2 | 39 2 1  | 0 0 | 1 0 | 0 0 | 0 0 | 0 0 | 18    |

|                 |   |          |     |     |     |     |     |       |
|-----------------|---|----------|-----|-----|-----|-----|-----|-------|
| PTHR23083-SF9   | 2 | 8 2 2    | 0 0 | 0 0 | 0 0 | 0 0 | 0 0 | 12.15 |
| PTHR23110       | 2 | 15 0 0   | 0 0 | 0 0 | 0 0 | 0 0 | 2 2 | 31.36 |
| PTHR23124       | 2 | 21 1 1   | 0 0 | 0 0 | 0 0 | 1 1 | 1 1 | 10.88 |
| PTHR23124-SF7   | 2 | 13 1 0   | 2 1 | 0 0 | 0 0 | 0 0 | 0 0 | 34.41 |
| PTHR23124-SF9   | 2 | 11 1 1   | 0 0 | 0 0 | 0 0 | 1 1 | 0 0 | 42.36 |
| PTHR23139       | 2 | 12 0 0   | 0 0 | 2 1 | 1 0 | 1 0 | 0 0 | 18.12 |
| PTHR23139-SF9   | 2 | 10 0 0   | 0 0 | 2 1 | 1 0 | 0 0 | 0 0 | 20.95 |
| PTHR23155-SF10  | 2 | 7 0 0    | 0 0 | 2 2 | 0 0 | 0 0 | 0 0 | 32.31 |
| PTHR23155-SF25  | 2 | 5 0 0    | 0 0 | 2 2 | 0 0 | 0 0 | 0 0 | 24.27 |
| PTHR23155-SF34  | 2 | 21 0 0   | 0 0 | 2 2 | 0 0 | 0 0 | 0 0 | 28.23 |
| PTHR23224-SF107 | 2 | 11 0 0   | 0 0 | 0 0 | 0 0 | 0 0 | 1 1 | 59.67 |
| PTHR23224-SF21  | 2 | 6 0 0    | 0 0 | 0 0 | 0 0 | 0 0 | 2 2 | 63.7  |
| PTHR23224-SF381 | 2 | 6 0 0    | 0 0 | 0 0 | 0 0 | 0 0 | 2 2 | 22.76 |
| PTHR23224-SF452 | 2 | 9 0 0    | 0 0 | 0 0 | 0 0 | 0 0 | 2 2 | 71.97 |
| PTHR23224-SF457 | 2 | 5 0 0    | 0 0 | 0 0 | 0 0 | 0 0 | 2 2 | 93.12 |
| PTHR23224-SF466 | 2 | 3 0 0    | 0 0 | 0 0 | 0 0 | 0 0 | 2 2 | 85.62 |
| PTHR23224-SF470 | 2 | 6 0 0    | 0 0 | 0 0 | 0 0 | 0 0 | 1 1 | 78.24 |
| PTHR23224-SF474 | 2 | 5 0 0    | 0 0 | 0 0 | 0 0 | 0 0 | 2 2 | 53.3  |
| PTHR23224-SF51  | 2 | 3 0 0    | 0 0 | 0 0 | 0 0 | 0 0 | 2 2 | 78.91 |
| PTHR23229       | 2 | 34 0 0   | 0 0 | 0 0 | 0 0 | 0 0 | 2 2 | 37.99 |
| PTHR23229-SF13  | 2 | 28 0 0   | 0 0 | 0 0 | 0 0 | 0 0 | 2 2 | 31.99 |
| PTHR23233-SF13  | 2 | 5 0 0    | 0 0 | 0 0 | 0 0 | 0 0 | 2 2 | 49.41 |
| PTHR23246       | 2 | 237 0 0  | 2 2 | 0 0 | 0 0 | 0 0 | 0 0 | 19.54 |
| PTHR23258-SF430 | 2 | 23 0 0   | 0 0 | 2 2 | 0 0 | 0 0 | 0 0 | 13.03 |
| PTHR23258-SF462 | 2 | 19 0 0   | 0 0 | 2 2 | 0 0 | 0 0 | 0 0 | 19.04 |
| PTHR23264-SF4   | 2 | 4 1 0    | 1 0 | 0 0 | 0 0 | 0 0 | 1 1 | 19.2  |
| PTHR23270       | 2 | 12 0 0   | 0 0 | 0 0 | 0 0 | 1 1 | 0 0 | 31.47 |
| PTHR23272       | 2 | 45 0 0   | 0 0 | 1 0 | 0 0 | 1 1 | 1 0 | 15.78 |
| PTHR23274       | 2 | 5 2 2    | 0 0 | 0 0 | 0 0 | 0 0 | 0 0 | 28.3  |
| PTHR23315       | 2 | 14 0 0   | 0 0 | 1 1 | 0 0 | 0 0 | 1 1 | 12.06 |
| PTHR23323-SF24  | 2 | 11 0 0   | 0 0 | 0 0 | 0 0 | 1 1 | 0 0 | 14.53 |
| TIGR00268       | 2 | 3 2 2    | 0 0 | 0 0 | 0 0 | 0 0 | 0 0 | 64.88 |
| TIGR00269       | 2 | 22 1 0   | 2 1 | 0 0 | 1 0 | 2 0 | 0 0 | 30.75 |
| TIGR00402       | 2 | 33 2 2   | 0 0 | 0 0 | 0 0 | 0 0 | 0 0 | 45.4  |
| TIGR01007       | 2 | 30 2 2   | 0 0 | 0 0 | 0 0 | 0 0 | 0 0 | 30.59 |
| TIGR01098       | 2 | 120 2 2  | 0 0 | 0 0 | 0 0 | 0 0 | 0 0 | 15.74 |
| TIGR01251       | 2 | 11 0 0   | 0 0 | 0 0 | 1 1 | 0 0 | 1 1 | 17.76 |
| TIGR01427       | 2 | 37 2 2   | 0 0 | 0 0 | 0 0 | 0 0 | 0 0 | 51.82 |
| TIGR01456       | 2 | 82 0 0   | 0 0 | 0 0 | 0 0 | 0 0 | 0 0 | 37.25 |
| TIGR01470       | 2 | 167 2 2  | 0 0 | 0 0 | 0 0 | 0 0 | 0 0 | 22.16 |
| TIGR01488       | 2 | 11 2 2   | 0 0 | 0 0 | 0 0 | 0 0 | 0 0 | 21.2  |
| TIGR01499       | 2 | 75 0 0   | 0 0 | 0 0 | 0 0 | 2 2 | 0 0 | 24.97 |
| TIGR01557       | 2 | 17 0 0   | 0 0 | 2 2 | 0 0 | 0 0 | 0 0 | 26.85 |
| TIGR01640       | 2 | 91 0 0   | 0 0 | 0 0 | 0 0 | 0 0 | 0 0 | 11.04 |
| TIGR01713       | 2 | 80 3 3   | 0 0 | 0 0 | 0 0 | 0 0 | 0 0 | 29.59 |
| TIGR01765       | 2 | 60 2 2   | 0 0 | 0 0 | 0 0 | 0 0 | 0 0 | 44.92 |
| TIGR01766       | 2 | 134 2 2  | 0 0 | 0 0 | 0 0 | 0 0 | 0 0 | 19.86 |
| TIGR02163       | 2 | 103 2 2  | 0 0 | 0 0 | 0 0 | 0 0 | 0 0 | 53.77 |
| TIGR02246       | 2 | 59 2 2   | 0 0 | 0 0 | 0 0 | 0 0 | 0 0 | 14.38 |
| TIGR02282       | 2 | 186 2 2  | 0 0 | 0 0 | 0 0 | 0 0 | 0 0 | 45.91 |
| TIGR02283       | 2 | 99 2 2   | 0 0 | 0 0 | 0 0 | 0 0 | 0 0 | 39.51 |
| TIGR02322       | 2 | 17 2 2   | 0 0 | 0 0 | 0 0 | 0 0 | 0 0 | 44.06 |
| TIGR02594       | 2 | 58 2 2   | 0 0 | 0 0 | 0 0 | 0 0 | 0 0 | 29.27 |
| TIGR02634       | 2 | 7 2 2    | 0 0 | 0 0 | 0 0 | 0 0 | 0 0 | 62.74 |
| TIGR02816       | 2 | 5 2 2    | 0 0 | 0 0 | 0 0 | 0 0 | 0 0 | 57.93 |
| TIGR03063       | 2 | 39 2 2   | 0 0 | 0 0 | 0 0 | 0 0 | 0 0 | 46.41 |
| TIGR03083       | 2 | 19 2 2   | 0 0 | 0 0 | 0 0 | 0 0 | 0 0 | 19.2  |
| TIGR03309       | 2 | 55 2 2   | 0 0 | 0 0 | 0 0 | 0 0 | 0 0 | 59.25 |
| TIGR03462       | 2 | 97 0 0   | 1 1 | 0 0 | 0 0 | 1 1 | 0 0 | 14.44 |
| TIGR03483       | 2 | 42 2 2   | 0 0 | 0 0 | 0 0 | 0 0 | 0 0 | 45.05 |
| TIGR03669       | 2 | 5 0 0    | 0 0 | 2 2 | 0 0 | 0 0 | 0 0 | 49.35 |
| IPR000010       | 3 | 416 0 0  | 0 0 | 1 1 | 0 0 | 0 0 | 2 2 | 10.61 |
| IPR000032       | 3 | 6 3 3    | 0 0 | 0 0 | 0 0 | 0 0 | 0 0 | 66.78 |
| IPR000043       | 3 | 630 1 1  | 0 0 | 1 1 | 0 0 | 1 1 | 0 0 | 49.05 |
| IPR000045       | 3 | 951 1 0  | 2 2 | 1 0 | 0 0 | 0 0 | 0 0 | 15.65 |
| IPR000060       | 3 | 738 2 2  | 0 0 | 1 0 | 0 0 | 0 0 | 1 0 | 34.31 |
| IPR000062       | 3 | 970 2 2  | 0 0 | 0 0 | 0 0 | 1 1 | 0 0 | 26.44 |
| IPR000077       | 3 | 111 0 0  | 0 0 | 0 0 | 0 0 | 0 0 | 1 1 | 59.47 |
| IPR000170       | 3 | 75 3 3   | 0 0 | 0 0 | 0 0 | 0 0 | 0 0 | 43.21 |
| IPR000237       | 3 | 178 0 0  | 0 0 | 0 0 | 0 0 | 1 1 | 2 2 | 31.59 |
| IPR000257       | 3 | 861 2 2  | 0 0 | 0 0 | 0 0 | 1 1 | 0 0 | 23.95 |
| IPR000281       | 3 | 1314 3 2 | 0 0 | 1 0 | 0 0 | 0 0 | 0 0 | 16.42 |
| IPR000292       | 3 | 620 2 2  | 0 0 | 1 1 | 0 0 | 0 0 | 0 0 | 22.16 |
| IPR000310       | 3 | 681 2 0  | 2 0 | 2 1 | 1 0 | 0 0 | 0 0 | 24.8  |
| IPR000320       | 3 | 51 0 0   | 0 0 | 0 0 | 0 0 | 0 0 | 3 3 | 70.71 |
| IPR000327       | 3 | 221 0 0  | 0 0 | 0 0 | 0 0 | 0 0 | 3 3 | 62.49 |
| IPR000334       | 3 | 16 2 2   | 0 0 | 0 0 | 0 0 | 1 1 | 0 0 | 43.46 |
| IPR000353       | 3 | 512 0 0  | 0 0 | 0 0 | 0 0 | 0 0 | 3 3 | 55.09 |
| IPR000390       | 3 | 1103 3 3 | 0 0 | 0 0 | 0 0 | 0 0 | 0 0 | 28.4  |
| IPR000394       | 3 | 503 3 3  | 0 0 | 0 0 | 0 0 | 0 0 | 0 0 | 36.4  |
| IPR000400       | 3 | 9 3 3    | 0 0 | 0 0 | 0 0 | 0 0 | 0 0 | 33.89 |
| IPR000439       | 3 | 173 0 0  | 1 1 | 2 2 | 0 0 | 0 0 | 0 0 | 55.23 |
| IPR000472       | 3 | 211 0 0  | 0 0 | 0 0 | 0 0 | 0 0 | 3 3 | 18.94 |
| IPR000522       | 3 | 2836 3 2 | 1 0 | 0 0 | 0 0 | 0 0 | 0 0 | 26.92 |
| IPR000558       | 3 | 364 0 0  | 0 0 | 0 0 | 0 0 | 0 0 | 3 3 | 80.01 |
| IPR000568       | 3 | 1343 0 0 | 0 0 | 3 3 | 0 0 | 0 0 | 0 0 | 23.59 |
| IPR000652       | 3 | 1022 2 2 | 0 0 | 0 0 | 1 1 | 0 0 | 0 0 | 35.56 |
| IPR000675       | 3 | 268 2 2  | 0 0 | 0 0 | 0 0 | 1 1 | 0 0 | 23.07 |
| IPR000690       | 3 | 4 0 0    | 0 0 | 0 0 | 0 0 | 0 0 | 2 2 | 23.22 |
| IPR000692       | 3 | 158 0 0  | 1 1 | 2 2 | 0 0 | 0 0 | 0 0 | 53.3  |
| IPR000755       | 3 | 208 3 3  | 0 0 | 0 0 | 0 0 | 0 0 | 0 0 | 24.42 |
| IPR000818       | 3 | 120 1 1  | 0 0 | 2 2 | 0 0 | 0 0 | 0 0 | 38.14 |
| IPR000819       | 3 | 1157 2 1 | 1 0 | 1 0 | 1 0 | 1 0 | 2 1 | 36.23 |
| IPR000829       | 3 | 532 3 3  | 0 0 | 0 0 | 0 0 | 0 0 | 0 0 | 29.05 |
| IPR000894       | 3 | 227 1 1  | 0 0 | 2 2 | 0 0 | 0 0 | 0 0 | 29.63 |
| IPR000895       | 3 | 336 2 1  | 0 0 | 1 0 | 0 0 | 1 1 | 0 0 | 37.07 |
| IPR000898       | 3 | 97 0 0   | 0 0 | 0 0 | 0 0 | 3 3 | 0 0 | 26.39 |
| IPR000915       | 3 | 126 0 0  | 0 0 | 2 1 | 0 0 | 1 0 | 2 1 | 42.27 |
| IPR000916       | 3 | 212 0 0  | 0 0 | 3 3 | 0 0 | 0 0 | 0 0 | 17.86 |
| IPR000988       | 3 | 111 0 0  | 0 0 | 3 3 | 0 0 | 0 0 | 0 0 | 45.61 |
| IPR001015       | 3 | 756 0 0  | 0 0 | 2 2 | 0 0 | 1 1 | 0 0 | 24.57 |
| IPR001039       | 3 | 1336 0 0 | 0 0 | 0 0 | 0 0 | 3 3 | 0 0 | 49.04 |
| IPR001059       | 3 | 911 2 0  | 0 0 | 3 1 | 0 0 | 0 0 | 0 0 | 29.06 |
| IPR001082       | 3 | 229 3 2  | 0 0 | 1 0 | 0 0 | 0 0 | 0 0 | 14.27 |
| IPR001104       | 3 | 271 0 0  | 0 0 | 1 0 | 0 0 | 1 0 | 2 1 | 19.17 |
| IPR001182       | 3 | 1609 2 2 | 0 0 | 0 0 | 0 0 | 0 0 | 1 1 | 25.72 |
| IPR001187       | 3 | 135 0 0  | 0 0 | 0 0 | 0 0 | 0 0 | 3 3 | 15.39 |
| IPR001203       | 3 | 327 3 2  | 0 0 | 1 0 | 0 0 | 0 0 | 0 0 | 19.61 |
| IPR001232       | 3 | 317 0 0  | 0 0 | 2 1 | 0 0 | 1 0 | 1 1 | 34.28 |
| IPR001248       | 3 | 868 0 0  | 0 0 | 0 0 | 0 0 | 3 3 | 0 0 | 10.28 |
| IPR001272       | 3 | 438 0 0  | 0 0 | 3 3 | 0 0 | 0 0 | 0 0 | 39.39 |
| IPR001275       | 3 | 175 0 0  | 0 0 | 0 0 | 0 0 | 0 0 | 3 3 | 62.24 |
| IPR001292       | 3 | 26 0 0   | 0 0 | 0 0 | 0 0 | 0 0 | 4 4 | 65.26 |
| IPR001441       | 3 | 1060 0 0 | 0 0 | 0 0 | 0 0 | 1 1 | 1 1 | 36.17 |
| IPR001457       | 3 | 800 1 1  | 0 0 | 2 2 | 0 0 | 0 0 | 0 0 | 25.6  |
| IPR001464       | 3 | 15 0 0   | 0 0 | 1 1 | 0 0 | 1 1 | 0 0 | 12.05 |
| IPR001476       | 3 | 1050 0 0 | 0 0 | 2 2 | 0 0 | 0 0 | 0 0 | 47.13 |
| IPR001503       | 3 | 294 2 2  | 0 0 | 0 0 | 0 0 | 0 0 | 1 1 | 16.63 |
| IPR001526       | 3 | 92 0 0   | 0 0 | 0 0 | 0 0 | 0 0 | 3 3 | 12.99 |
| IPR001548       | 3 | 204 0 0  | 0 0 | 0 0 | 0 0 | 0 0 | 2 2 | 32.62 |
| IPR001695       | 3 | 99 1 1   | 0 0 | 0 0 | 0 0 | 0 0 | 2 2 | 52.18 |
| IPR001783       | 3 | 1542 1 1 | 0 0 | 0 0 | 0 0 | 2 2 | 0 0 | 28.49 |
| IPR001787       | 3 | 824 1 1  | 0 0 | 0 0 | 0 0 | 2 2 | 0 0 | 37.96 |
| IPR001813       | 3 | 471 1 0  | 1 0 | 2 1 | 2 0 | 1 0 | 1 0 | 26.35 |
| IPR001872       | 3 | 852 1 1  | 0 0 | 2 2 | 0 0 | 0 0 | 0 0 | 26.99 |
| IPR001892       | 3 | 960 0 0  | 0 0 | 0 0 | 0 0 | 3 3 | 0 0 | 46.5  |
| IPR001901       | 3 | 855 0 0  | 0 0 | 1 1 | 0 0 | 0 0 | 0 0 | 22.47 |
| IPR001910       | 3 | 840 2 2  | 0 0 | 1 1 | 0 0 | 0 0 | 0 0 | 20.94 |
| IPR002076       | 3 | 532 0 0  | 0 0 | 2 2 | 0 0 | 0 0 | 1 1 | 23.6  |
| IPR002128       | 3 | 111 3 1  | 0 0 | 2 0 | 0 0 | 0 0 | 0 0 | 28.67 |
| IPR002259       | 3 | 202 0 0  | 0 0 | 1 1 | 0 0 | 0 0 | 2 2 | 18.05 |
| IPR002310       | 3 | 574 2 1  | 0 0 | 2 1 | 0 0 | 0 0 | 0 0 | 60.92 |
| IPR002348       | 3 | 273 0 0  | 0 0 | 0 0 | 0 0 | 0 0 | 2 2 | 22.72 |
| IPR002366       | 3 | 91 0 0   | 0 0 | 0 0 | 0 0 | 0 0 | 3 3 | 54.21 |
| IPR002513       | 3 | 414 1 1  | 0 0 | 2 2 | 0 0 | 0 0 | 0 0 | 12.61 |
| IPR002549       | 3 | 2142 3 3 | 0 0 | 0 0 | 0 0 | 0 0 | 0 0 | 11.37 |
| IPR002554       | 3 | 2658 0 0 | 0 0 | 2 2 | 0 0 | 0 0 | 0 0 | 31.09 |
| IPR002675       | 3 | 99 0 0   | 0 0 | 3 3 | 0 0 | 0 0 | 0 0 | 55.99 |
| IPR002687       | 3 | 288 0 0  | 1 0 | 3 0 | 3 0 | 3 0 | 3 0 | 36    |
| IPR002696       | 3 | 672 3 3  | 0 0 | 0 0 | 0 0 | 0 0 | 0 0 | 43.67 |
| IPR002706       | 3 | 39 0 0   | 0 0 | 0 0 | 0 0 | 0 0 | 3 3 | 48.89 |
| IPR002708       | 3 | 84 2 0   | 3 1 | 0 0 | 0 0 | 0 0 | 0 0 | 39.98 |
| IPR002713       | 3 | 247 2 2  | 0 0 | 0 0 | 0 0 | 0 0 | 0 0 | 24.98 |
| IPR002742       | 3 | 118 3 2  | 1 0 | 0 0 | 0 0 | 0 0 | 0 0 | 36.72 |
| IPR002779       | 3 | 492 1 1  | 0 0 | 2 2 | 0 0 | 0 0 | 0 0 | 33.29 |
| IPR002782       | 3 | 164 1 1  | 0 0 |     |     |     |     |       |

|           |   |          |     |     |     |     |     |       |
|-----------|---|----------|-----|-----|-----|-----|-----|-------|
| IPR002808 | 3 | 93 2 2   | 1 1 | 0 0 | 0 0 | 0 0 | 0 0 | 19.38 |
| IPR002810 | 3 | 724 3 1  | 2 0 | 0 0 | 0 0 | 0 0 | 0 0 | 13.2  |
| IPR002811 | 3 | 95 1 0   | 3 2 | 0 0 | 0 0 | 0 0 | 1 0 | 39.34 |
| IPR002828 | 3 | 688 1 1  | 0 0 | 0 0 | 0 0 | 2 2 | 0 0 | 32.97 |
| IPR002930 | 3 | 889 3 3  | 0 0 | 0 0 | 0 0 | 0 0 | 0 0 | 40.72 |
| IPR003119 | 3 | 120 0 0  | 0 0 | 0 0 | 0 0 | 0 0 | 3 3 | 53.29 |
| IPR003171 | 3 | 830 2 1  | 1 0 | 1 1 | 0 0 | 0 0 | 0 0 | 21.43 |
| IPR003318 | 3 | 16 3 3   | 0 0 | 0 0 | 0 0 | 0 0 | 0 0 | 46.49 |
| IPR003335 | 3 | 2841 2 2 | 0 0 | 0 0 | 0 0 | 1 1 | 0 0 | 16.11 |
| IPR003339 | 3 | 1001 2 2 | 1 1 | 0 0 | 0 0 | 0 0 | 0 0 | 10.09 |
| IPR003350 | 3 | 163 0 0  | 0 0 | 0 0 | 0 0 | 0 0 | 1 1 | 33.55 |
| IPR003370 | 3 | 1115 0 0 | 0 0 | 1 1 | 0 0 | 2 2 | 0 0 | 18.47 |
| IPR003372 | 3 | 47 1 1   | 0 0 | 2 2 | 0 0 | 0 0 | 0 0 | 75.38 |
| IPR003404 | 3 | 7 1 1    | 0 0 | 0 0 | 0 0 | 0 0 | 2 2 | 10.52 |
| IPR003421 | 3 | 86 3 2   | 0 0 | 0 0 | 0 0 | 1 0 | 1 0 | 22.3  |
| IPR003431 | 3 | 64 3 3   | 0 0 | 0 0 | 0 0 | 1 1 | 0 0 | 30.13 |
| IPR003435 | 3 | 38 0 0   | 0 0 | 3 3 | 0 0 | 0 0 | 0 0 | 33.92 |
| IPR003447 | 3 | 369 3 3  | 0 0 | 0 0 | 0 0 | 0 0 | 0 0 | 8.31  |
| IPR003468 | 3 | 283 3 2  | 0 0 | 0 0 | 0 0 | 0 0 | 1 0 | 46.04 |
| IPR003494 | 3 | 1448 3 3 | 0 0 | 0 0 | 0 0 | 0 0 | 0 0 | 13.25 |
| IPR003511 | 3 | 226 0 0  | 0 0 | 2 2 | 0 0 | 0 0 | 1 1 | 16.11 |
| IPR003526 | 3 | 644 2 1  | 0 0 | 0 0 | 0 0 | 2 1 | 0 0 | 44.58 |
| IPR003595 | 3 | 11 0 0   | 0 0 | 0 0 | 0 0 | 0 0 | 3 3 | 33.34 |
| IPR003619 | 3 | 275 0 0  | 0 0 | 0 0 | 0 0 | 0 0 | 4 4 | 40.36 |
| IPR003648 | 3 | 51 0 0   | 0 0 | 3 0 | 0 0 | 2 0 | 3 0 | 42.34 |
| IPR003651 | 3 | 892 2 0  | 1 0 | 2 1 | 0 0 | 1 0 | 2 0 | 41.65 |
| IPR003654 | 3 | 194 0 0  | 0 0 | 0 0 | 0 0 | 1 1 | 0 0 | 54.13 |
| IPR003682 | 3 | 746 3 3  | 0 0 | 0 0 | 0 0 | 0 0 | 0 0 | 24.35 |
| IPR003688 | 3 | 428 3 3  | 0 0 | 0 0 | 0 0 | 0 0 | 0 0 | 12.99 |
| IPR003696 | 3 | 187 3 3  | 0 0 | 0 0 | 0 0 | 0 0 | 0 0 | 31.21 |
| IPR003724 | 3 | 557 3 2  | 0 0 | 1 0 | 0 0 | 0 0 | 0 0 | 34.84 |
| IPR003758 | 3 | 443 3 3  | 0 0 | 0 0 | 0 0 | 0 0 | 1 1 | 27.21 |
| IPR003760 | 3 | 591 2 1  | 1 0 | 1 1 | 0 0 | 0 0 | 0 0 | 21.04 |
| IPR003786 | 3 | 549 3 3  | 0 0 | 0 0 | 0 0 | 0 0 | 0 0 | 25.88 |
| IPR003814 | 3 | 154 3 1  | 2 0 | 0 0 | 0 0 | 0 0 | 0 0 | 16.81 |
| IPR003825 | 3 | 632 3 3  | 0 0 | 0 0 | 0 0 | 0 0 | 0 0 | 12.37 |
| IPR003851 | 3 | 251 0 0  | 0 0 | 3 3 | 0 0 | 0 0 | 0 0 | 66.89 |
| IPR003894 | 3 | 73 0 0   | 0 0 | 0 0 | 0 0 | 3 3 | 0 0 | 44.62 |
| IPR003929 | 3 | 78 0 0   | 0 0 | 0 0 | 1 0 | 0 0 | 3 2 | 34.62 |
| IPR004003 | 3 | 495 1 1  | 0 0 | 2 0 | 2 0 | 2 0 | 2 0 | 47.89 |
| IPR004006 | 3 | 453 3 2  | 0 0 | 1 0 | 1 0 | 1 0 | 1 0 | 37.84 |
| IPR004041 | 3 | 247 0 0  | 0 0 | 3 3 | 0 0 | 0 0 | 0 0 | 38.21 |
| IPR004083 | 3 | 32 0 0   | 0 0 | 1 1 | 0 0 | 1 0 | 1 0 | 22.05 |
| IPR004106 | 3 | 613 3 2  | 1 0 | 2 1 | 1 0 | 1 0 | 1 0 | 14.11 |
| IPR004131 | 3 | 338 1 1  | 0 0 | 2 2 | 0 0 | 0 0 | 0 0 | 44.28 |
| IPR004140 | 3 | 323 0 0  | 0 0 | 1 1 | 0 0 | 0 0 | 2 2 | 19.09 |
| IPR004150 | 3 | 13 3 3   | 0 0 | 0 0 | 0 0 | 0 0 | 0 0 | 45.36 |
| IPR004181 | 3 | 226 0 0  | 0 0 | 3 1 | 2 0 | 1 0 | 1 0 | 38.94 |
| IPR004183 | 3 | 633 2 2  | 0 0 | 1 1 | 0 0 | 0 0 | 0 0 | 17.84 |
| IPR004189 | 3 | 19 3 3   | 0 0 | 0 0 | 0 0 | 0 0 | 0 0 | 44.25 |
| IPR004209 | 3 | 82 2 1   | 2 1 | 0 0 | 0 0 | 0 0 | 0 0 | 33.08 |
| IPR004212 | 3 | 105 2 2  | 0 0 | 0 0 | 0 0 | 0 0 | 1 1 | 40.43 |
| IPR004236 | 3 | 35 3 3   | 0 0 | 0 0 | 0 0 | 0 0 | 0 0 | 22.33 |
| IPR004245 | 3 | 284 0 0  | 0 0 | 0 0 | 0 0 | 0 0 | 4 4 | 22.02 |
| IPR004264 | 3 | 75 0 0   | 0 0 | 4 4 | 0 0 | 0 0 | 0 0 | 25.84 |
| IPR004320 | 3 | 241 0 0  | 0 0 | 2 2 | 0 0 | 0 0 | 0 0 | 29.18 |
| IPR004462 | 3 | 77 3 2   | 1 0 | 0 0 | 0 0 | 0 0 | 0 0 | 55.64 |
| IPR004464 | 3 | 414 3 3  | 0 0 | 0 0 | 0 0 | 0 0 | 0 0 | 47.99 |
| IPR004465 | 3 | 250 3 3  | 0 0 | 0 0 | 0 0 | 0 0 | 0 0 | 37.22 |
| IPR004477 | 3 | 703 3 2  | 0 0 | 0 0 | 0 0 | 0 0 | 1 0 | 14.27 |
| IPR004600 | 3 | 79 0 0   | 0 0 | 1 1 | 0 0 | 0 0 | 2 2 | 35.01 |
| IPR004628 | 3 | 226 2 2  | 1 1 | 0 0 | 0 0 | 0 0 | 0 0 | 38.62 |
| IPR004886 | 3 | 148 0 0  | 0 0 | 0 0 | 0 0 | 3 3 | 0 0 | 42.88 |
| IPR004910 | 3 | 199 0 0  | 0 0 | 0 0 | 0 0 | 1 1 | 2 2 | 41.88 |
| IPR004971 | 3 | 99 0 0   | 0 0 | 2 2 | 0 0 | 1 1 | 1 1 | 30.46 |
| IPR005003 | 3 | 160 3 3  | 0 0 | 0 0 | 0 0 | 0 0 | 0 0 | 50.82 |
| IPR005012 | 3 | 38 0 0   | 0 0 | 0 0 | 2 2 | 0 0 | 1 1 | 35.73 |
| IPR005043 | 3 | 91 0 0   | 0 0 | 3 0 | 1 0 | 3 0 | 2 0 | 27.83 |
| IPR005053 | 3 | 165 3 3  | 0 0 | 0 0 | 0 0 | 0 0 | 0 0 | 29.27 |
| IPR005078 | 3 | 145 0 0  | 0 0 | 2 2 | 0 0 | 0 0 | 1 1 | 34.03 |
| IPR005094 | 3 | 260 4 4  | 0 0 | 0 0 | 0 0 | 0 0 | 0 0 | 6.61  |
| IPR005103 | 3 | 134 0 0  | 0 0 | 0 0 | 0 0 | 3 3 | 0 0 | 28.87 |
| IPR005140 | 3 | 282 0 0  | 0 0 | 2 0 | 2 0 | 2 0 | 2 0 | 18.4  |
| IPR005142 | 3 | 287 2 1  | 2 0 | 2 0 | 2 0 | 2 0 | 2 0 | 27.55 |
| IPR005182 | 3 | 849 3 3  | 0 0 | 0 0 | 0 0 | 0 0 | 0 0 | 11.43 |
| IPR005183 | 3 | 517 3 3  | 0 0 | 0 0 | 0 0 | 0 0 | 0 0 | 28.79 |
| IPR005300 | 3 | 293 1 1  | 0 0 | 0 0 | 0 0 | 0 0 | 0 0 | 34.93 |
| IPR005301 | 3 | 272 0 0  | 0 0 | 2 2 | 0 0 | 0 0 | 0 0 | 31.28 |
| IPR005317 | 3 | 118 2 2  | 0 0 | 0 0 | 0 0 | 0 0 | 0 0 | 29.39 |
| IPR005320 | 3 | 358 3 3  | 0 0 | 0 0 | 0 0 | 0 0 | 0 0 | 14.53 |
| IPR005326 | 3 | 119 0 0  | 0 0 | 0 0 | 0 0 | 0 0 | 3 3 | 56.48 |
| IPR005335 | 3 | 160 3 3  | 0 0 | 0 0 | 0 0 | 0 0 | 0 0 | 14.8  |
| IPR005373 | 3 | 87 0 0   | 0 0 | 0 0 | 0 0 | 3 3 | 0 0 | 28.89 |
| IPR005468 | 3 | 35 0 0   | 0 0 | 0 0 | 0 0 | 0 0 | 0 0 | 27.48 |
| IPR005503 | 3 | 529 2 2  | 0 0 | 1 1 | 0 0 | 0 0 | 0 0 | 12.58 |
| IPR005519 | 3 | 286 1 1  | 0 0 | 2 2 | 0 0 | 0 0 | 0 0 | 16.77 |
| IPR005539 | 3 | 92 0 0   | 0 0 | 3 3 | 0 0 | 0 0 | 0 0 | 44.63 |
| IPR005540 | 3 | 91 0 0   | 0 0 | 3 3 | 0 0 | 0 0 | 0 0 | 43.8  |
| IPR005541 | 3 | 94 0 0   | 0 0 | 3 3 | 0 0 | 0 0 | 0 0 | 40.22 |
| IPR005590 | 3 | 181 3 3  | 0 0 | 0 0 | 0 0 | 0 0 | 0 0 | 39.5  |
| IPR005593 | 3 | 259 3 1  | 0 0 | 0 0 | 0 0 | 0 0 | 0 0 | 49.08 |
| IPR005617 | 3 | 80 0 0   | 0 0 | 0 0 | 0 0 | 0 0 | 3 3 | 72.27 |
| IPR005624 | 3 | 533 3 3  | 0 0 | 0 0 | 0 0 | 0 0 | 0 0 | 20.13 |
| IPR005633 | 3 | 94 0 0   | 0 0 | 1 0 | 1 0 | 2 1 | 2 1 | 47.25 |
| IPR005636 | 3 | 334 0 0  | 0 0 | 3 3 | 0 0 | 0 0 | 0 0 | 19.3  |
| IPR005648 | 3 | 477 3 3  | 0 0 | 0 0 | 0 0 | 0 0 | 0 0 | 22.21 |
| IPR005650 | 3 | 467 3 3  | 0 0 | 0 0 | 0 0 | 0 0 | 0 0 | 19.26 |
| IPR005919 | 3 | 47 0 0   | 0 0 | 0 0 | 0 0 | 3 3 | 0 0 | 39.82 |
| IPR006018 | 3 | 42 1 1   | 0 0 | 0 0 | 0 0 | 0 0 | 0 0 | 29.85 |
| IPR006029 | 3 | 984 1 0  | 0 0 | 1 0 | 0 0 | 0 0 | 3 2 | 19.35 |
| IPR006035 | 3 | 1137 3 3 | 0 0 | 0 0 | 0 0 | 0 0 | 0 0 | 18.02 |
| IPR006097 | 3 | 990 3 2  | 0 0 | 1 0 | 1 0 | 1 0 | 1 0 | 31.36 |
| IPR006155 | 3 | 83 0 0   | 0 0 | 2 1 | 1 1 | 1 0 | 1 0 | 32.76 |
| IPR006194 | 3 | 7 3 3    | 0 0 | 0 0 | 0 0 | 0 0 | 0 0 | 40.28 |
| IPR006214 | 3 | 1016 0 0 | 0 0 | 1 1 | 0 0 | 0 0 | 2 2 | 17.3  |
| IPR006270 | 3 | 203 3 3  | 0 0 | 0 0 | 0 0 | 0 0 | 0 0 | 45.03 |
| IPR006389 | 3 | 17 2 2   | 0 0 | 0 0 | 1 1 | 0 0 | 0 0 | 19.34 |
| IPR006429 | 3 | 169 3 3  | 0 0 | 0 0 | 0 0 | 0 0 | 0 0 | 20.98 |
| IPR006433 | 3 | 238 3 3  | 0 0 | 0 0 | 0 0 | 0 0 | 0 0 | 17.55 |
| IPR006442 | 3 | 1099 4 4 | 0 0 | 0 0 | 0 0 | 0 0 | 0 0 | 11.24 |
| IPR006456 | 3 | 121 0 0  | 0 0 | 4 4 | 0 0 | 0 0 | 0 0 | 58.12 |
| IPR006602 | 3 | 235 0 0  | 0 0 | 1 0 | 2 0 | 0 0 | 3 1 | 25.52 |
| IPR006609 | 3 | 93 0 0   | 0 0 | 0 0 | 0 0 | 0 0 | 3 3 | 44.04 |
| IPR006617 | 3 | 209 0 0  | 0 0 | 0 0 | 0 0 | 0 0 | 2 2 | 16.68 |
| IPR006621 | 3 | 248 0 0  | 0 0 | 0 0 | 0 0 | 0 0 | 3 3 | 25.02 |
| IPR006639 | 3 | 272 0 0  | 0 0 | 4 2 | 0 0 | 0 0 | 2 0 | 20.05 |
| IPR006667 | 3 | 694 2 0  | 3 1 | 0 0 | 0 0 | 0 0 | 0 0 | 23.35 |
| IPR006708 | 3 | 76 0 0   | 0 0 | 1 1 | 0 0 | 0 0 | 2 2 | 25.31 |
| IPR006734 | 3 | 117 0 0  | 0 0 | 3 3 | 0 0 | 0 0 | 0 0 | 50.31 |
| IPR006773 | 3 | 136 0 0  | 0 0 | 4 4 | 0 0 | 0 0 | 0 0 | 23.44 |
| IPR006827 | 3 | 89 3 3   | 0 0 | 0 0 | 0 0 | 0 0 | 0 0 | 7.78  |
| IPR006839 | 3 | 251 0 0  | 0 0 | 3 3 | 0 0 | 0 0 | 0 0 | 32.83 |
| IPR006840 | 3 | 295 0 0  | 0 0 | 0 0 | 0 0 | 2 2 | 1 1 | 29.52 |
| IPR006861 | 3 | 144 0 0  | 0 0 | 1 0 | 0 0 | 1 0 | 2 2 | 28.7  |
| IPR006866 | 3 | 31 0 0   | 0 0 | 3 3 | 0 0 | 0 0 | 0 0 | 27.73 |
| IPR006868 | 3 | 132 0 0  | 0 0 | 3 2 | 0 0 | 1 0 | 0 0 | 38.65 |
| IPR006876 | 3 | 160 0 0  | 0 0 | 0 0 | 0 0 | 2 2 | 1 1 | 9.73  |
| IPR006879 | 3 | 288 3 3  | 0 0 | 0 0 | 0 0 | 0 0 | 0 0 | 18.06 |
| IPR006897 | 3 | 25 0 0   | 0 0 | 0 0 | 0 0 | 0 0 | 3 3 | 58.99 |
| IPR006898 | 3 | 7 0 0    | 0 0 | 0 0 | 0 0 | 0 0 | 3 3 | 71.38 |
| IPR006903 | 3 | 47 0 0   | 0 0 | 1 0 | 0 0 | 0 0 | 2 1 | 34.34 |
| IPR006917 | 3 | 151 0 0  | 0 0 | 2 2 | 0 0 | 0 0 | 1 1 | 21.23 |
| IPR006937 | 3 | 136 3 3  | 0 0 | 0 0 | 0 0 | 0 0 | 0 0 | 48.58 |
| IPR006939 | 3 | 109 0 0  | 0 0 | 1 1 | 0 0 | 1 1 | 1 1 | 36.6  |
| IPR006943 | 3 | 71 0 0   | 0 0 | 3 3 | 0 0 | 0 0 | 0 0 | 27.03 |
| IPR006947 | 3 | 21 0 0   | 0 0 | 3 3 | 0 0 | 0 0 | 0 0 | 66.17 |
| IPR006949 | 3 | 378 2 2  | 0 0 | 1 1 | 0 0 | 0 0 | 0 0 | 9.8   |
| IPR006953 | 3 | 65 0 0   | 0 0 | 1 0 | 0 0 | 3 2 | 1 0 | 26.02 |
| IPR006957 | 3 | 57 0 0   | 0 0 | 1 1 | 0 0 | 0 0 | 2 2 | 34.01 |
| IPR006966 | 3 | 75 0 0   | 0 0 | 1 1 | 0 0 | 2 2 | 0 0 | 23.43 |
| IPR006968 | 3 | 123 0 0  | 0 0 | 2 2 | 0 0 | 1 1 | 0 0 | 24.07 |
| IPR006976 | 3 | 624 3 3  | 0 0 | 0 0 | 0 0 | 0 0 | 0 0 | 14.4  |
| IPR006993 | 3 | 73 0 0   | 0 0 | 0 0 | 0 0 | 0 0 | 3 3 | 38.45 |
| IPR007074 | 3 | 249 3 3  | 0 0 | 0 0 | 0 0 | 0 0 | 0 0 | 15.49 |
| IPR007084 | 3 | 104 0 0  | 0 0 | 0 0 | 0 0 | 0 0 | 3 3 | 25.06 |
| IPR007085 | 3 | 850 2 1  | 1   |     |     |     |     |       |

|           |   |          |     |     |     |     |     |         |
|-----------|---|----------|-----|-----|-----|-----|-----|---------|
| IPR007133 | 3 | 97 0 0   | 0 0 | 0 0 | 0 0 | 1 1 | 1 1 | 18.61   |
| IPR007151 | 3 | 81 0 0   | 0 0 | 2 2 | 0 0 | 0 0 | 1 1 | 25.21   |
| IPR007173 | 3 | 288 2 1  | 0 0 | 2 1 | 1 0 | 1 0 | 1 0 | 14.9    |
| IPR007180 | 3 | 77 0 0   | 0 0 | 1 0 | 1 0 | 2 1 | 2 1 | 64.07   |
| IPR007191 | 3 | 77 0 0   | 0 0 | 1 0 | 0 0 | 2 1 | 2 1 | 28.16   |
| IPR007193 | 3 | 64 0 0   | 0 0 | 1 0 | 0 0 | 2 1 | 1 0 | 27.67   |
| IPR007199 | 3 | 87 0 0   | 0 0 | 3 1 | 0 0 | 2 0 | 2 0 | 30.24   |
| IPR007220 | 3 | 73 0 0   | 0 0 | 2 2 | 0 0 | 0 0 | 1 1 | 31.21   |
| IPR007238 | 3 | 130 0 0  | 3 3 | 0 0 | 0 0 | 0 0 | 0 0 | 23.07   |
| IPR007263 | 3 | 337 2 2  | 0 0 | 2 2 | 0 0 | 0 0 | 0 0 | 14.25   |
| IPR007272 | 3 | 1118 3 3 | 0 0 | 0 0 | 0 0 | 1 1 | 0 0 | 22.3    |
| IPR007281 | 3 | 82 0 0   | 0 0 | 2 1 | 1 0 | 1 0 | 3 2 | 30.67   |
| IPR007297 | 3 | 388 3 2  | 1 0 | 0 0 | 0 0 | 0 0 | 0 0 | 38.81   |
| IPR007310 | 3 | 378 3 2  | 0 0 | 0 0 | 0 0 | 1 0 | 0 0 | 13.2    |
| IPR007314 | 3 | 147 2 2  | 0 0 | 1 1 | 0 0 | 0 0 | 0 0 | 19      |
| IPR007320 | 3 | 125 0 0  | 0 0 | 2 1 | 1 1 | 0 0 | 1 0 | 23.24   |
| IPR007325 | 3 | 673 1 1  | 0 0 | 0 0 | 0 0 | 0 0 | 2 2 | 13.34   |
| IPR007349 | 3 | 273 3 2  | 1 0 | 0 0 | 0 0 | 0 0 | 0 0 | 15.15   |
| IPR007365 | 3 | 171 2 0  | 0 0 | 2 0 | 0 0 | 2 0 | 3 1 | 16.92   |
| IPR007379 | 3 | 390 1 1  | 0 0 | 1 1 | 0 0 | 0 0 | 1 1 | 14.81   |
| IPR007387 | 3 | 990 3 3  | 0 0 | 0 0 | 0 0 | 0 0 | 0 0 | 9.92    |
| IPR007446 | 3 | 162 1 0  | 0 0 | 3 2 | 0 0 | 0 0 | 0 0 | 22.74   |
| IPR007472 | 3 | 310 1 0  | 0 0 | 2 1 | 0 0 | 2 1 | 1 0 | 32.07   |
| IPR007475 | 3 | 295 1 1  | 0 0 | 0 0 | 0 0 | 2 2 | 0 0 | 33.1    |
| IPR007481 | 3 | 253 0 0  | 0 0 | 3 3 | 0 0 | 0 0 | 0 0 | 40.79   |
| IPR007482 | 3 | 149 0 0  | 0 0 | 2 2 | 0 0 | 0 0 | 1 1 | 31.01   |
| IPR007500 | 3 | 189 3 3  | 0 0 | 0 0 | 0 0 | 0 0 | 2 2 | 37.65   |
| IPR007517 | 3 | 11 2 1   | 1 0 | 0 0 | 0 0 | 0 0 | 1 1 | 24.43   |
| IPR007518 | 3 | 82 0 0   | 0 0 | 2 2 | 1 1 | 0 0 | 0 0 | 22.85   |
| IPR007549 | 3 | 121 3 2  | 1 0 | 0 0 | 0 0 | 0 0 | 0 0 | 25.05   |
| IPR007603 | 3 | 213 0 0  | 0 0 | 1 1 | 0 0 | 1 1 | 1 1 | 12.69   |
| IPR007612 | 3 | 212 0 0  | 0 0 | 3 3 | 0 0 | 0 0 | 0 0 | 17.15   |
| IPR007621 | 3 | 612 4 4  | 0 0 | 0 0 | 0 0 | 0 0 | 0 0 | 14.58   |
| IPR007638 | 3 | 61 0 0   | 0 0 | 3 0 | 0 0 | 3 0 | 3 0 | 35.69   |
| IPR007712 | 3 | 1154 3 3 | 0 0 | 0 0 | 0 0 | 0 0 | 0 0 | 7.98    |
| IPR007714 | 3 | 85 0 0   | 0 0 | 3 1 | 0 0 | 0 0 | 3 1 | 48.72   |
| IPR007718 | 3 | 64 0 0   | 0 0 | 1 0 | 0 0 | 1 0 | 1 1 | 36.27   |
| IPR007756 | 3 | 15 3 3   | 0 0 | 0 0 | 0 0 | 0 0 | 0 0 | 37.02   |
| IPR007757 | 3 | 190 1 1  | 0 0 | 0 0 | 0 0 | 1 1 | 1 1 | 21.42   |
| IPR007760 | 3 | 230 3 3  | 0 0 | 0 0 | 0 0 | 0 0 | 0 0 | 29.5    |
| IPR007775 | 3 | 14 0 0   | 0 0 | 0 0 | 0 0 | 2 2 | 1 1 | 51.8    |
| IPR007789 | 3 | 86 0 0   | 0 0 | 2 2 | 0 0 | 0 0 | 0 0 | 10.99   |
| IPR007844 | 3 | 673 3 3  | 0 0 | 0 0 | 0 0 | 0 0 | 0 0 | 4.77    |
| IPR007855 | 3 | 145 0 0  | 0 0 | 0 0 | 0 0 | 1 1 | 0 0 | 21.7    |
| IPR007856 | 3 | 8 0 0    | 0 0 | 1 1 | 0 0 | 0 0 | 3 3 | 20.66   |
| IPR007865 | 3 | 535 1 0  | 0 0 | 2 1 | 1 0 | 1 0 | 2 1 | 19.05   |
| IPR007887 | 3 | 118 3 3  | 0 0 | 0 0 | 0 0 | 0 0 | 0 0 | 17.31   |
| IPR007948 | 3 | 170 3 3  | 0 0 | 0 0 | 0 0 | 0 0 | 0 0 | 35.82   |
| IPR007991 | 3 | 97 0 0   | 0 0 | 3 3 | 0 0 | 0 0 | 0 0 | 21.76   |
| IPR008011 | 3 | 354 0 0  | 0 0 | 0 0 | 0 0 | 1 1 | 2 2 | 17.76   |
| IPR008023 | 3 | 529 3 3  | 0 0 | 0 0 | 0 0 | 0 0 | 0 0 | 8.7     |
| IPR008025 | 3 | 48 0 0   | 0 0 | 0 0 | 0 0 | 0 0 | 3 3 | 40.76   |
| IPR008039 | 3 | 18 2 2   | 2 2 | 0 0 | 0 0 | 0 0 | 0 0 | 41.26   |
| IPR008147 | 3 | 1094 1 0 | 1 0 | 1 0 | 1 0 | 1 0 | 3 2 | 31.22   |
| IPR008154 | 3 | 79 0 0   | 0 0 | 0 0 | 0 0 | 0 0 | 3 3 | 57.8    |
| IPR008217 | 3 | 517 1 0  | 1 0 | 2 2 | 0 0 | 0 0 | 0 0 | 20.19   |
| IPR008286 | 3 | 660 2 0  | 2 0 | 2 1 | 1 0 | 0 0 | 0 0 | 23.99   |
| IPR008391 | 3 | 129 1 1  | 0 0 | 0 0 | 0 0 | 0 0 | 0 0 | 18.19   |
| IPR008432 | 3 | 18 0 0   | 0 0 | 3 3 | 0 0 | 0 0 | 0 0 | 61.57   |
| IPR008475 | 3 | 324 3 3  | 0 0 | 0 0 | 0 0 | 0 0 | 0 0 | 19.69   |
| IPR008487 | 3 | 35 3 3   | 0 0 | 0 0 | 0 0 | 0 0 | 0 0 | 35.53   |
| IPR008511 | 3 | 68 0 0   | 0 0 | 2 2 | 0 0 | 0 0 | 0 0 | 27.52   |
| IPR008514 | 3 | 468 3 3  | 0 0 | 0 0 | 0 0 | 0 0 | 0 0 | 21.22   |
| IPR008517 | 3 | 80 3 3   | 0 0 | 0 0 | 0 0 | 0 0 | 0 0 | 38.43   |
| IPR008523 | 3 | 428 3 3  | 0 0 | 0 0 | 0 0 | 0 0 | 0 0 | 25.83   |
| IPR008537 | 3 | 103 0 0  | 0 0 | 3 3 | 0 0 | 0 0 | 0 0 | 27.13   |
| IPR008546 | 3 | 81 0 0   | 0 0 | 3 3 | 0 0 | 0 0 | 0 0 | 39.83   |
| IPR008547 | 3 | 150 1 1  | 0 0 | 1 1 | 0 0 | 0 0 | 1 1 | 13.93   |
| IPR008565 | 3 | 129 3 3  | 0 0 | 0 0 | 0 0 | 0 0 | 0 0 | 33.36   |
| IPR008567 | 3 | 345 3 3  | 0 0 | 0 0 | 0 0 | 0 0 | 0 0 | 25.67   |
| IPR008579 | 3 | 444 3 2  | 0 0 | 0 0 | 0 0 | 1 0 | 0 0 | 16.65   |
| IPR008584 | 3 | 88 0 0   | 0 0 | 2 2 | 0 0 | 1 1 | 0 0 | 30.12   |
| IPR008593 | 3 | 60 2 2   | 0 0 | 0 0 | 0 0 | 0 0 | 0 0 | 29.3    |
| IPR008620 | 3 | 201 3 3  | 0 0 | 0 0 | 0 0 | 0 0 | 0 0 | 10.6    |
| IPR008631 | 3 | 100 3 3  | 0 0 | 0 0 | 0 0 | 0 0 | 0 0 | 46.2    |
| IPR008700 | 3 | 130 0 0  | 0 0 | 3 3 | 0 0 | 0 0 | 0 0 | 39.62   |
| IPR008707 | 3 | 92 3 3   | 0 0 | 0 0 | 0 0 | 0 0 | 0 0 | 27.96   |
| IPR008715 | 3 | 83 3 3   | 0 0 | 0 0 | 0 0 | 0 0 | 0 0 | 26.56   |
| IPR008803 | 3 | 80 0 0   | 0 0 | 3 3 | 0 0 | 0 0 | 0 0 | 32.99   |
| IPR008815 | 3 | 236 3 3  | 0 0 | 0 0 | 0 0 | 0 0 | 0 0 | 19.71   |
| IPR008833 | 3 | 25 0 0   | 0 0 | 2 2 | 0 0 | 0 0 | 1 1 | 30.64   |
| IPR008851 | 3 | 78 0 0   | 0 0 | 2 2 | 0 0 | 0 0 | 1 1 | 25.42   |
| IPR008867 | 3 | 545 2 2  | 1 1 | 0 0 | 0 0 | 0 0 | 0 0 | 46.51   |
| IPR008905 | 3 | 96 0 0   | 0 0 | 1 0 | 1 0 | 3 2 | 1 0 | 37.8    |
| IPR008958 | 3 | 179 0 0  | 0 0 | 0 0 | 0 0 | 0 0 | 3 3 | 11.7    |
| IPR009067 | 3 | 31 0 0   | 0 0 | 3 1 | 0 0 | 0 0 | 2 0 | 48.43   |
| IPR009105 | 3 | 9 5 5    | 0 0 | 0 0 | 0 0 | 0 0 | 0 0 | 27.58   |
| IPR009360 | 3 | 73 0 0   | 0 0 | 0 0 | 0 0 | 3 3 | 0 0 | 40.96   |
| IPR009362 | 3 | 225 1 1  | 0 0 | 1 1 | 0 0 | 0 0 | 1 1 | 31.31   |
| IPR009380 | 3 | 83 3 3   | 0 0 | 0 0 | 0 0 | 0 0 | 0 0 | 34.59   |
| IPR009389 | 3 | 90 2 2   | 0 0 | 0 0 | 0 0 | 0 0 | 0 0 | 29.73   |
| IPR009449 | 3 | 70 0 0   | 0 0 | 0 0 | 0 0 | 1 1 | 1 1 | 30.16   |
| IPR009453 | 3 | 33 0 0   | 0 0 | 0 0 | 0 0 | 3 3 | 0 0 | 53.51   |
| IPR009457 | 3 | 79 0 0   | 0 0 | 1 1 | 0 0 | 0 0 | 2 2 | 30      |
| IPR009555 | 3 | 20 3 3   | 0 0 | 0 0 | 0 0 | 0 0 | 0 0 | 77.51   |
| IPR009567 | 3 | 38 0 0   | 0 0 | 0 0 | 0 0 | 1 1 | 0 0 | 34.7    |
| IPR009582 | 3 | 83 0 0   | 0 0 | 0 0 | 0 0 | 0 0 | 3 3 | 23.23   |
| IPR009607 | 3 | 12 0 0   | 0 0 | 0 0 | 0 0 | 2 2 | 1 1 | 45.29   |
| IPR009613 | 3 | 53 2 2   | 0 0 | 0 0 | 1 1 | 0 0 | 0 0 | 34.67   |
| IPR009617 | 3 | 86 0 0   | 0 0 | 0 0 | 0 0 | 2 2 | 0 0 | 23.7    |
| IPR009640 | 3 | 50 3 3   | 0 0 | 0 0 | 0 0 | 0 0 | 0 0 | 65.92   |
| IPR009688 | 3 | 117 0 0  | 0 0 | 0 0 | 0 0 | 1 1 | 1 1 | 28.79   |
| IPR009715 | 3 | 66 3 3   | 0 0 | 0 0 | 0 0 | 0 0 | 0 0 | 63.83   |
| IPR009716 | 3 | 71 0 0   | 0 0 | 3 3 | 0 0 | 0 0 | 0 0 | 22.94   |
| IPR009717 | 3 | 61 3 3   | 0 0 | 0 0 | 0 0 | 0 0 | 0 0 | 60.24   |
| IPR009719 | 3 | 45 0 0   | 0 0 | 3 3 | 0 0 | 0 0 | 0 0 | 55.91   |
| IPR009730 | 3 | 81 0 0   | 0 0 | 0 0 | 0 0 | 0 0 | 3 3 | 36.97   |
| IPR009734 | 3 | 141 1 1  | 0 0 | 2 2 | 0 0 | 0 0 | 0 0 | 27.11   |
| IPR009827 | 3 | 82 3 3   | 0 0 | 0 0 | 0 0 | 0 0 | 0 0 | 36.03   |
| IPR009928 | 3 | 100 3 3  | 0 0 | 0 0 | 0 0 | 0 0 | 0 0 | 29.11   |
| IPR009939 | 3 | 16 0 0   | 0 0 | 0 0 | 0 0 | 3 3 | 0 0 | 39.24   |
| IPR010270 | 3 | 85 3 3   | 0 0 | 0 0 | 0 0 | 0 0 | 0 0 | 28.57   |
| IPR010308 | 3 | 111 0 0  | 0 0 | 2 2 | 0 0 | 1 1 | 0 0 | 18.99   |
| IPR010317 | 3 | 87 3 3   | 0 0 | 0 0 | 0 0 | 0 0 | 1 1 | 17.63   |
| IPR010333 | 3 | 111 3 3  | 0 0 | 0 0 | 0 0 | 0 0 | 0 0 | 34.82   |
| IPR010372 | 3 | 736 1 1  | 0 0 | 0 0 | 0 0 | 2 1 | 1 0 | 8.44    |
| IPR010373 | 3 | 31 3 3   | 0 0 | 0 0 | 0 0 | 0 0 | 0 0 | 22.74   |
| IPR010420 | 3 | 33 0 0   | 0 0 | 2 2 | 0 0 | 0 0 | 0 0 | 55.01   |
| IPR010428 | 3 | 192 3 3  | 0 0 | 0 0 | 0 0 | 0 0 | 0 0 | 28.99   |
| IPR010441 | 3 | 112 0 0  | 0 0 | 1 0 | 0 0 | 0 0 | 3 2 | 18.37   |
| IPR010451 | 3 | 177 2 2  | 0 0 | 0 0 | 0 0 | 1 1 | 0 0 | 8.43    |
| IPR010481 | 3 | 27 0 0   | 0 0 | 0 0 | 0 0 | 3 3 | 0 0 | 48.23   |
| IPR010504 | 3 | 108 0 0  | 0 0 | 0 0 | 0 0 | 0 0 | 3 3 | 26.91   |
| IPR010505 | 3 | 771 2 0  | 2 0 | 3 0 | 0 0 | 3 0 | 3 0 | 27.57   |
| IPR010514 | 3 | 273 3 2  | 0 0 | 1 0 | 0 0 | 0 0 | 0 0 | 26.04   |
| IPR010518 | 3 | 76 3 3   | 0 0 | 0 0 | 0 0 | 0 0 | 0 0 | 20.67   |
| IPR010540 | 3 | 88 3 3   | 0 0 | 0 0 | 0 0 | 0 0 | 0 0 | 19.89   |
| IPR010600 | 3 | 56 0 0   | 0 0 | 0 0 | 0 0 | 0 0 | 3 3 | 36.32   |
| IPR010605 | 3 | 39 0 0   | 0 0 | 3 3 | 0 0 | 0 0 | 0 0 | 27.73   |
| IPR010609 | 3 | 79 3 3   | 0 0 | 0 0 | 0 0 | 0 0 | 0 0 | 33.79   |
| IPR010610 | 3 | 46 3 3   | 0 0 | 0 0 | 0 0 | 0 0 | 0 0 | 32.68   |
| IPR010623 | 3 | 253 3 3  | 0 0 | 0 0 | 0 0 | 0 0 | 0 0 | 17.93   |
| IPR010632 | 3 | 15 0 0   | 0 0 | 3 3 | 0 0 | 0 0 | 0 0 | 55.04   |
| IPR010637 | 3 | 33 3 3   | 0 0 | 0 0 | 0 0 | 0 0 | 0 0 | 38.99   |
| IPR010674 | 3 | 107 0 0  | 0 0 | 2 1 | 1 0 | 1 0 | 2 1 | 54.54   |
| IPR010710 | 3 | 390 3 3  | 0 0 | 0 0 | 0 0 | 0 0 | 0 0 | 32.18   |
| IPR010712 | 3 | 74 3 3   | 0 0 | 0 0 | 0 0 | 0 0 | 0 0 | 37.83   |
| IPR010714 | 3 | 97 0 0   | 0 0 | 3 0 | 2 0 | 3 0 | 3 0 | 36.95   |
| IPR010718 | 3 | 239 3 3  | 0 0 | 0 0 | 0 0 | 0 0 | 0 0 | 37.36   |
| IPR010733 | 3 | 64 0 0   | 0 0 | 1 1 | 0 0 | 1 1 | 1 1 | 22.14   |
| IPR010770 | 3 | 72 0 0   | 0 0 | 3 3 | 0 0 | 0 0 | 0 0 | 25.08   |
| IPR010790 | 3 | 14 2 2   | 0 0 | 0 0 | 0 0 | 0 0 | 1 1 | 56.71   |
| IPR010796 | 3 | 103 0 0  | 0 0 | 0 0 | 0 0 | 1 1 | 2 2 | 20.68   |
| IPR010799 | 3 | 145 3 2  | 1 0 | 0 0 | 0 0 | 1 0 | 0 0 | 26.19   |
| IPR010897 | 3 | 99 3 3   | 0 0 | 0 0 | 0 0 | 0 0 | 0 0 | 27.4    |
| IPR010901 | 3 | 4 0 0    | 0 0 | 0 0 | 1 1 | 0 0 | 1 1 | 29.26</ |

|           |   |          |     |     |     |     |     |       |
|-----------|---|----------|-----|-----|-----|-----|-----|-------|
| IPRO10991 | 3 | 53 0 0   | 0 0 | 0 0 | 0 0 | 0 0 | 3 3 | 50.54 |
| IPRO11020 | 3 | 50 2 2   | 0 0 | 0 0 | 0 0 | 0 0 | 1 1 | 33.35 |
| IPRO11089 | 3 | 224 3 2  | 1 0 | 0 0 | 1 0 | 0 0 | 0 0 | 23.45 |
| IPRO11093 | 3 | 78 3 3   | 0 0 | 0 0 | 0 0 | 0 0 | 0 0 | 33.83 |
| IPRO11113 | 3 | 34 3 3   | 0 0 | 0 0 | 0 0 | 0 0 | 0 0 | 28.83 |
| IPRO11119 | 3 | 97 3 3   | 0 0 | 0 0 | 0 0 | 0 0 | 0 0 | 29.13 |
| IPRO11430 | 3 | 55 0 0   | 0 0 | 2 1 | 0 0 | 2 1 | 1 0 | 34.53 |
| IPRO11444 | 3 | 86 3 3   | 0 0 | 0 0 | 0 0 | 0 0 | 0 0 | 17.31 |
| IPRO11491 | 3 | 449 3 3  | 0 0 | 0 0 | 0 0 | 0 0 | 0 0 | 22.87 |
| IPRO11514 | 3 | 92 3 3   | 0 0 | 0 0 | 0 0 | 0 0 | 0 0 | 22.17 |
| IPRO11525 | 3 | 3 0 0    | 0 0 | 3 3 | 0 0 | 0 0 | 0 0 | 47.32 |
| IPRO11541 | 3 | 424 2 2  | 0 0 | 0 0 | 0 0 | 1 1 | 0 0 | 12.39 |
| IPRO11621 | 3 | 180 3 3  | 0 0 | 0 0 | 0 0 | 0 0 | 0 0 | 10.06 |
| IPRO11624 | 3 | 159 3 3  | 0 0 | 0 0 | 0 0 | 0 0 | 0 0 | 9.95  |
| IPRO11652 | 3 | 795 3 3  | 0 0 | 0 0 | 0 0 | 0 0 | 0 0 | 22.68 |
| IPRO11657 | 3 | 617 2 0  | 0 0 | 0 0 | 0 0 | 2 0 | 3 1 | 37.57 |
| IPRO11715 | 3 | 10 0 0   | 0 0 | 0 0 | 0 0 | 0 0 | 3 3 | 57.73 |
| IPRO11978 | 3 | 361 3 2  | 0 0 | 1 0 | 0 0 | 0 0 | 0 0 | 9.52  |
| IPRO11988 | 3 | 17 0 0   | 0 0 | 0 0 | 0 0 | 0 0 | 3 3 | 64.58 |
| IPRO12315 | 3 | 60 0 0   | 0 0 | 0 0 | 0 0 | 0 0 | 3 3 | 54    |
| IPRO12454 | 3 | 103 2 2  | 0 0 | 1 1 | 0 0 | 0 0 | 0 0 | 12.03 |
| IPRO12462 | 3 | 100 0 0  | 0 0 | 1 1 | 0 0 | 0 0 | 1 1 | 29.15 |
| IPRO12493 | 3 | 41 0 0   | 0 0 | 0 0 | 0 0 | 0 0 | 3 3 | 37.39 |
| IPRO12530 | 3 | 15 3 3   | 0 0 | 0 0 | 0 0 | 0 0 | 0 0 | 60.46 |
| IPRO12531 | 3 | 20 0 0   | 0 0 | 0 0 | 0 0 | 3 3 | 0 0 | 41.59 |
| IPRO12541 | 3 | 70 0 0   | 0 0 | 3 1 | 2 0 | 2 0 | 2 0 | 38.33 |
| IPRO12551 | 3 | 176 3 3  | 0 0 | 0 0 | 0 0 | 0 0 | 0 0 | 34.96 |
| IPRO12577 | 3 | 331 1 1  | 0 0 | 1 1 | 0 0 | 0 0 | 1 1 | 10.72 |
| IPRO12582 | 3 | 9 0 0    | 0 0 | 0 0 | 0 0 | 0 0 | 3 3 | 30.09 |
| IPRO12600 | 3 | 7 5 5    | 0 0 | 0 0 | 0 0 | 0 0 | 0 0 | 14.50 |
| IPRO12644 | 3 | 87 0 0   | 0 0 | 0 0 | 0 0 | 0 0 | 3 3 | 31.83 |
| IPRO12850 | 3 | 74 1 0   | 0 0 | 3 2 | 0 0 | 0 0 | 0 0 | 44.75 |
| IPRO12862 | 3 | 35 2 2   | 0 0 | 1 1 | 0 0 | 0 0 | 0 0 | 36.88 |
| IPRO12882 | 3 | 28 0 0   | 0 0 | 0 0 | 0 0 | 1 1 | 0 0 | 36.89 |
| IPRO12886 | 3 | 77 2 0   | 0 0 | 2 1 | 0 0 | 0 0 | 2 0 | 36.93 |
| IPRO12887 | 3 | 36 2 0   | 0 0 | 3 1 | 0 0 | 0 0 | 2 0 | 22.54 |
| IPRO12925 | 3 | 241 3 3  | 0 0 | 0 0 | 0 0 | 0 0 | 0 0 | 12.95 |
| IPRO12931 | 3 | 153 4 4  | 0 0 | 0 0 | 0 0 | 0 0 | 0 0 | 14.32 |
| IPRO12936 | 3 | 210 0 0  | 0 0 | 2 2 | 0 0 | 1 1 | 0 0 | 27.84 |
| IPRO12941 | 3 | 135 1 0  | 0 0 | 0 0 | 0 0 | 3 2 | 0 0 | 16    |
| IPRO12944 | 3 | 756 3 3  | 0 0 | 0 0 | 0 0 | 0 0 | 0 0 | 16.89 |
| IPRO12967 | 3 | 245 0 0  | 0 0 | 3 2 | 0 0 | 1 0 | 1 0 | 33.69 |
| IPRO12971 | 3 | 76 0 0   | 0 0 | 1 0 | 2 1 | 2 1 | 1 0 | 46.77 |
| IPRO12974 | 3 | 167 0 0  | 0 0 | 3 1 | 2 0 | 2 0 | 0 0 | 35.58 |
| IPRO12976 | 3 | 272 0 0  | 1 0 | 3 0 | 3 0 | 3 0 | 3 0 | 38.55 |
| IPRO13081 | 3 | 101 2 1  | 0 0 | 3 2 | 0 0 | 0 0 | 0 0 | 49.52 |
| IPRO13104 | 3 | 10 3 3   | 0 0 | 0 0 | 0 0 | 0 0 | 0 0 | 51.56 |
| IPRO13123 | 3 | 1182 1 0 | 0 0 | 3 2 | 1 0 | 1 0 | 1 0 | 13.46 |
| IPRO13128 | 3 | 6 0 0    | 0 0 | 2 2 | 0 0 | 0 0 | 1 1 | 16.26 |
| IPRO13170 | 3 | 96 0 0   | 0 0 | 0 0 | 0 0 | 3 0 | 0 0 | 40.17 |
| IPRO13171 | 3 | 150 2 1  | 0 0 | 2 1 | 0 0 | 0 0 | 0 0 | 41.14 |
| IPRO13208 | 3 | 364 2 2  | 0 0 | 0 0 | 0 0 | 0 0 | 1 1 | 27.42 |
| IPRO13209 | 3 | 141 0 0  | 0 0 | 1 0 | 1 0 | 1 0 | 3 2 | 44.15 |
| IPRO13234 | 3 | 79 1 0   | 1 0 | 2 1 | 1 0 | 2 1 | 1 0 | 56.08 |
| IPRO13246 | 3 | 42 0 0   | 0 0 | 0 0 | 0 0 | 2 2 | 1 1 | 38.18 |
| IPRO13340 | 3 | 38 0 0   | 3 3 | 0 0 | 0 0 | 0 0 | 0 0 | 50.42 |
| IPRO13506 | 3 | 21 3 3   | 0 0 | 0 0 | 0 0 | 0 0 | 0 0 | 24.8  |
| IPRO13510 | 3 | 113 3 3  | 0 0 | 0 0 | 0 0 | 0 0 | 0 0 | 34.28 |
| IPRO13521 | 3 | 243 1 1  | 0 0 | 0 0 | 0 0 | 0 0 | 2 2 | 35.67 |
| IPRO13554 | 3 | 234 3 3  | 0 0 | 0 0 | 0 0 | 0 0 | 0 0 | 38.81 |
| IPRO13555 | 3 | 127 0 0  | 0 0 | 0 0 | 0 0 | 0 0 | 3 3 | 59.7  |
| IPRO13562 | 3 | 189 3 1  | 2 0 | 1 0 | 1 0 | 1 0 | 2 0 | 26.1  |
| IPRO13573 | 3 | 202 1 0  | 0 0 | 3 2 | 0 0 | 0 0 | 0 0 | 35.99 |
| IPRO13574 | 3 | 11 3 3   | 0 0 | 0 0 | 0 0 | 0 0 | 0 0 | 48.39 |
| IPRO13578 | 3 | 167 3 1  | 0 0 | 2 0 | 2 0 | 2 0 | 0 0 | 16.68 |
| IPRO13581 | 3 | 180 0 0  | 0 0 | 3 3 | 0 0 | 0 0 | 0 0 | 39.68 |
| IPRO13582 | 3 | 67 1 0   | 0 0 | 0 0 | 0 0 | 2 1 | 0 0 | 31.88 |
| IPRO13597 | 3 | 416 3 2  | 1 0 | 0 0 | 0 0 | 0 0 | 0 0 | 18.45 |
| IPRO13604 | 3 | 798 0 0  | 0 0 | 0 0 | 0 0 | 0 0 | 8 8 | 1.89  |
| IPRO13616 | 3 | 96 0 0   | 0 0 | 0 0 | 0 0 | 2 2 | 0 0 | 47.23 |
| IPRO13630 | 3 | 112 3 2  | 1 0 | 0 0 | 0 0 | 0 0 | 0 0 | 31.1  |
| IPRO13638 | 3 | 61 0 0   | 1 1 | 0 0 | 0 0 | 0 0 | 2 2 | 33.85 |
| IPRO13661 | 3 | 89 3 3   | 0 0 | 0 0 | 0 0 | 0 0 | 0 0 | 24.93 |
| IPRO13677 | 3 | 10 3 3   | 0 0 | 0 0 | 0 0 | 0 0 | 0 0 | 74.91 |
| IPRO13680 | 3 | 17 0 0   | 0 0 | 0 0 | 0 0 | 0 0 | 3 3 | 62.11 |
| IPRO13690 | 3 | 110 3 3  | 0 0 | 0 0 | 0 0 | 0 0 | 0 0 | 39.69 |
| IPRO13700 | 3 | 14 0 0   | 0 0 | 0 0 | 0 0 | 3 3 | 0 0 | 10.73 |
| IPRO13704 | 3 | 250 3 0  | 3 0 | 2 0 | 0 0 | 0 0 | 0 0 | 52.28 |
| IPRO13713 | 3 | 155 0 0  | 0 0 | 1 0 | 1 0 | 2 0 | 0 0 | 24.38 |
| IPRO13717 | 3 | 83 0 0   | 0 0 | 1 1 | 0 0 | 0 0 | 2 2 | 31.46 |
| IPRO13723 | 3 | 22 0 0   | 0 0 | 0 0 | 0 0 | 0 0 | 3 3 | 46.06 |
| IPRO13731 | 3 | 161 3 3  | 0 0 | 0 0 | 0 0 | 0 0 | 0 0 | 35.78 |
| IPRO13741 | 3 | 314 3 2  | 1 0 | 0 0 | 0 0 | 0 0 | 0 0 | 31.97 |
| IPRO13787 | 3 | 148 0 0  | 0 0 | 0 0 | 0 0 | 0 0 | 4 4 | 37.2  |
| IPRO13803 | 3 | 40 0 0   | 0 0 | 0 0 | 0 0 | 0 0 | 3 3 | 91.46 |
| IPRO13810 | 3 | 1001 1 0 | 1 0 | 2 1 | 1 0 | 1 0 | 1 0 | 45.19 |
| IPRO13839 | 3 | 23 3 3   | 0 0 | 0 0 | 0 0 | 0 0 | 0 0 | 22.45 |
| IPRO13840 | 3 | 840 3 1  | 2 0 | 2 0 | 0 0 | 0 0 | 0 0 | 39.78 |
| IPRO13842 | 3 | 836 3 0  | 0 0 | 3 0 | 3 0 | 3 0 | 3 0 | 63.85 |
| IPRO13843 | 3 | 169 0 0  | 3 0 | 3 0 | 3 0 | 3 0 | 3 0 | 59.1  |
| IPRO13845 | 3 | 158 0 0  | 3 0 | 3 0 | 3 0 | 3 0 | 3 0 | 52.25 |
| IPRO13867 | 3 | 43 0 0   | 0 0 | 0 0 | 0 0 | 3 2 | 1 0 | 25.78 |
| IPRO13919 | 3 | 61 0 0   | 0 0 | 2 2 | 0 0 | 1 1 | 0 0 | 28.56 |
| IPRO13922 | 3 | 287 0 0  | 0 0 | 0 0 | 0 0 | 3 3 | 0 0 | 19.38 |
| IPRO13923 | 3 | 73 0 0   | 0 0 | 2 0 | 0 0 | 0 0 | 3 1 | 21.54 |
| IPRO13924 | 3 | 70 0 0   | 1 1 | 0 0 | 2 2 | 0 0 | 0 0 | 24.65 |
| IPRO13934 | 3 | 69 0 0   | 0 0 | 3 1 | 2 0 | 3 0 | 2 0 | 30.32 |
| IPRO13940 | 3 | 37 0 0   | 0 0 | 3 3 | 0 0 | 0 0 | 0 0 | 15.29 |
| IPRO13945 | 3 | 37 0 0   | 0 0 | 0 0 | 0 0 | 3 3 | 0 0 | 41.42 |
| IPRO13956 | 3 | 35 0 0   | 0 0 | 0 0 | 0 0 | 3 3 | 0 0 | 38.86 |
| IPRO13967 | 3 | 52 0 0   | 0 0 | 0 0 | 0 0 | 3 1 | 2 0 | 32.16 |
| IPRO13969 | 3 | 115 1 0  | 1 0 | 1 0 | 1 0 | 1 1 | 0 0 | 24.33 |
| IPRO13978 | 3 | 109 0 0  | 0 0 | 3 3 | 1 0 | 0 0 | 0 0 | 28.6  |
| IPRO13982 | 3 | 846 3 1  | 2 0 | 1 0 | 0 0 | 1 0 | 1 0 | 37.99 |
| IPRO13983 | 3 | 326 3 2  | 1 0 | 0 0 | 0 0 | 0 0 | 0 0 | 29.98 |
| IPRO13987 | 3 | 316 3 2  | 0 0 | 1 0 | 0 0 | 0 0 | 0 0 | 58.11 |
| IPRO13992 | 3 | 111 0 0  | 0 0 | 1 0 | 1 0 | 3 1 | 2 0 | 38.03 |
| IPRO13996 | 3 | 14 0 0   | 0 0 | 0 0 | 0 0 | 0 0 | 3 1 | 52.47 |
| IPRO14017 | 3 | 26 3 2   | 1 0 | 0 0 | 0 0 | 0 0 | 0 0 | 2.53  |
| IPRO14161 | 3 | 213 2 2  | 0 0 | 0 0 | 0 0 | 2 2 | 0 0 | 19.83 |
| IPRO14786 | 3 | 65 0 0   | 0 0 | 1 0 | 0 0 | 2 1 | 2 1 | 43.72 |
| IPRO14800 | 3 | 22 0 0   | 0 0 | 0 0 | 0 0 | 0 0 | 3 3 | 34.29 |
| IPRO14813 | 3 | 64 0 0   | 0 0 | 1 0 | 1 0 | 2 1 | 2 1 | 39.64 |
| IPRO14825 | 3 | 292 2 2  | 0 0 | 1 1 | 0 0 | 0 0 | 0 0 | 8.7   |
| IPRO14832 | 3 | 73 3 2   | 0 0 | 1 0 | 0 0 | 0 0 | 0 0 | 7.62  |
| IPRO14833 | 3 | 120 3 2  | 0 0 | 1 0 | 0 0 | 0 0 | 0 0 | 13.72 |
| IPRO14836 | 3 | 98 0 0   | 0 0 | 0 0 | 0 0 | 0 0 | 3 3 | 52.65 |
| IPRO14889 | 3 | 69 0 0   | 0 0 | 2 1 | 0 0 | 1 0 | 2 1 | 38.75 |
| IPRO14909 | 3 | 76 2 1   | 0 0 | 2 1 | 0 0 | 0 0 | 0 0 | 47.89 |
| IPRO14928 | 3 | 47 1 1   | 0 0 | 0 0 | 0 0 | 0 0 | 2 2 | 48.63 |
| IPRO14942 | 3 | 414 3 3  | 0 0 | 0 0 | 0 0 | 0 0 | 0 0 | 4.17  |
| IPRO14945 | 3 | 49 3 3   | 0 0 | 0 0 | 0 0 | 0 0 | 0 0 | 40.33 |
| IPRO15005 | 3 | 38 0 0   | 2 2 | 0 0 | 0 0 | 0 0 | 0 0 | 45.89 |
| IPRO15014 | 3 | 63 3 3   | 0 0 | 0 0 | 0 0 | 0 0 | 0 0 | 71.87 |
| IPRO15039 | 3 | 18 0 0   | 0 0 | 0 0 | 0 0 | 0 0 | 3 3 | 49.99 |
| IPRO15042 | 3 | 28 0 0   | 0 0 | 0 0 | 0 0 | 0 0 | 3 3 | 69.33 |
| IPRO15047 | 3 | 20 0 0   | 0 0 | 0 0 | 0 0 | 0 0 | 3 3 | 38.27 |
| IPRO15048 | 3 | 135 0 0  | 0 0 | 0 0 | 3 0 | 3 0 | 3 0 | 48.6  |
| IPRO15063 | 3 | 39 0 0   | 0 0 | 0 0 | 0 0 | 0 0 | 3 3 | 38    |
| IPRO15070 | 3 | 3 0 0    | 0 0 | 0 0 | 0 0 | 0 0 | 3 3 | 51.67 |
| IPRO15095 | 3 | 9 0 0    | 0 0 | 0 0 | 0 0 | 0 0 | 4 4 | 39.32 |
| IPRO15151 | 3 | 102 0 0  | 0 0 | 3 1 | 1 0 | 0 0 | 2 0 | 30.12 |
| IPRO15171 | 3 | 32 3 3   | 0 0 | 0 0 | 0 0 | 0 0 | 0 0 | 34.29 |
| IPRO15172 | 3 | 87 0 0   | 0 0 | 3 1 | 0 0 | 2 0 | 2 0 | 37.46 |
| IPRO15176 | 3 | 23 3 1   | 0 0 | 0 0 | 0 0 | 0 0 | 2 0 | 31.98 |
| IPRO15177 | 3 | 22 3 1   | 0 0 | 0 0 | 0 0 | 0 0 | 2 0 | 29.98 |
| IPRO15183 | 3 | 16 3 3   | 0 0 | 0 0 | 0 0 | 0 0 | 0 0 | 38.86 |
| IPRO15185 | 3 | 10 5 5   | 0 0 | 0 0 | 0 0 | 0 0 | 0 0 | 61.44 |
| IPRO15217 | 3 | 12 3 3   | 0 0 | 0 0 | 0 0 | 0 0 | 0 0 | 51.34 |
| IPRO15225 | 3 | 94 3 3   | 0 0 | 0 0 | 0 0 | 0 0 | 0 0 | 23.76 |
| IPRO15237 | 3 | 41 3 2   | 1 0 | 0 0 | 0 0 | 0 0 | 0 0 | 42.31 |
| IPRO15262 | 3 | 353 3 3  | 0 0 | 0 0 | 0 0 | 0 0 | 0 0 | 10.79 |
| IPRO15293 | 3 | 115 3 2  | 0 0 | 0 0 | 0 0 | 0 0 | 0 0 | 29.72 |
| IPRO15323 | 3 | 74 3 3   | 0 0 | 0 0 | 0 0 | 0 0 | 0 0 | 28.31 |
| IPRO15348 | 3 | 71 0 0   | 0 0 | 2 0 | 2 0 | 2 0 | 3 0 | 53.43 |
| IPRO15365 | 3 | 920 2 0  | 0 0 | 3 1 | 2 0 | 0 0 | 0 0 | 45.78 |
| IPRO15377 | 3 | 204 1 0  | 0 0 | 1 0 | 0 0 | 3 2 | 1 0 | 27.44 |

|           |   |          |     |     |     |     |     |       |
|-----------|---|----------|-----|-----|-----|-----|-----|-------|
| IPRO15393 | 3 | 84 3 3   | 0 0 | 0 0 | 0 0 | 0 0 | 0 0 | 28.25 |
| IPRO15396 | 3 | 217 3 0  | 0 0 | 3 0 | 0 0 | 0 0 | 0 0 | 32.89 |
| IPRO15420 | 3 | 14 0 0   | 0 0 | 0 0 | 0 0 | 0 0 | 2 2 | 57.14 |
| IPRO15631 | 3 | 26 0 0   | 0 0 | 0 0 | 0 0 | 3 3 | 0 0 | 36.79 |
| IPRO15683 | 3 | 96 1 1   | 0 0 | 0 0 | 0 0 | 0 0 | 2 2 | 9.45  |
| IPRO15802 | 3 | 230 3 1  | 2 0 | 2 0 | 0 0 | 2 0 | 2 0 | 17.89 |
| IPRO15888 | 3 | 157 3 2  | 1 0 | 0 0 | 0 0 | 0 0 | 0 0 | 25.42 |
| IPRO15917 | 3 | 243 0 0  | 0 0 | 0 0 | 0 0 | 0 0 | 4 4 | 27.3  |
| IPRO15929 | 3 | 306 2 1  | 1 0 | 2 1 | 0 0 | 0 0 | 0 0 | 55.05 |
| IPRO15965 | 3 | 35 0 0   | 0 0 | 0 0 | 0 0 | 3 3 | 0 0 | 28.55 |
| IPRO15966 | 3 | 36 0 0   | 0 0 | 0 0 | 0 0 | 3 3 | 0 0 | 43.76 |
| IPRO15995 | 3 | 146 3 2  | 1 0 | 0 0 | 0 0 | 1 0 | 0 0 | 26.57 |
| IPRO16147 | 3 | 915 1 0  | 0 0 | 3 2 | 0 0 | 0 0 | 0 0 | 23.82 |
| IPRO16148 | 3 | 698 1 0  | 0 0 | 3 2 | 0 0 | 0 0 | 0 0 | 17.93 |
| IPRO16166 | 3 | 12 1 1   | 0 0 | 0 0 | 0 0 | 0 0 | 1 1 | 13.88 |
| IPRO16180 | 3 | 1010 0 0 | 0 0 | 3 3 | 0 0 | 0 0 | 0 0 | 41.46 |
| IPRO16516 | 3 | 243 3 3  | 0 0 | 0 0 | 0 0 | 0 0 | 0 0 | 22.45 |
| IPRO18035 | 3 | 452 3 3  | 0 0 | 0 0 | 0 0 | 0 0 | 0 0 | 12.8  |
| IPRO18076 | 3 | 2907 4 4 | 0 0 | 0 0 | 0 0 | 0 0 | 0 0 | 9.8   |
| IPRO18222 | 3 | 19 0 0   | 0 0 | 3 3 | 0 0 | 0 0 | 0 0 | 24.73 |
| IPRO18463 | 3 | 5 0 0    | 1 1 | 0 0 | 0 0 | 0 0 | 2 2 | 39.75 |
| IPRO18501 | 3 | 5 0 0    | 0 0 | 1 1 | 0 0 | 0 0 | 1 1 | 19.31 |
| IPRO18532 | 3 | 153 2 2  | 0 0 | 0 0 | 0 0 | 1 1 | 0 0 | 33.87 |
| IPRO18537 | 3 | 131 3 3  | 0 0 | 0 0 | 0 0 | 0 0 | 0 0 | 27.62 |
| IPRO18639 | 3 | 243 3 3  | 0 0 | 0 0 | 0 0 | 0 0 | 0 0 | 17.18 |
| IPRO18641 | 3 | 158 3 3  | 0 0 | 0 0 | 0 0 | 0 0 | 0 0 | 21.74 |
| IPRO18649 | 3 | 182 0 0  | 0 0 | 3 3 | 0 0 | 0 0 | 0 0 | 19.15 |
| IPRO18658 | 3 | 79 2 2   | 1 1 | 0 0 | 0 0 | 0 0 | 0 0 | 29.67 |
| IPRO18727 | 3 | 88 3 3   | 0 0 | 0 0 | 0 0 | 0 0 | 0 0 | 14.41 |
| IPRO18746 | 3 | 40 3 3   | 0 0 | 0 0 | 0 0 | 0 0 | 0 0 | 20.31 |
| IPRO18768 | 3 | 135 3 3  | 0 0 | 0 0 | 0 0 | 0 0 | 0 0 | 22.2  |
| IPRO18774 | 3 | 66 3 3   | 0 0 | 0 0 | 0 0 | 0 0 | 0 0 | 27.64 |
| IPRO18796 | 3 | 25 0 0   | 0 0 | 0 0 | 0 0 | 0 0 | 3 3 | 44.26 |
| IPRO18829 | 3 | 25 0 0   | 0 0 | 0 0 | 0 0 | 3 3 | 0 0 | 61.54 |
| IPRO18841 | 3 | 122 3 3  | 0 0 | 0 0 | 0 0 | 0 0 | 0 0 | 19.67 |
| IPRO18870 | 3 | 42 0 0   | 0 0 | 1 1 | 0 0 | 1 1 | 1 1 | 17.64 |
| IPRO18875 | 3 | 38 3 3   | 0 0 | 0 0 | 0 0 | 0 0 | 0 0 | 36.1  |
| IPRO18906 | 3 | 113 5 5  | 0 0 | 0 0 | 0 0 | 0 0 | 0 0 | 40.49 |
| IPRO18950 | 3 | 305 3 3  | 0 0 | 0 0 | 0 0 | 0 0 | 0 0 | 25.35 |
| IPRO18960 | 3 | 66 0 0   | 0 0 | 3 3 | 0 0 | 0 0 | 0 0 | 21.98 |
| IPRO18965 | 3 | 121 0 0  | 0 0 | 3 0 | 3 0 | 3 0 | 3 0 | 37.7  |
| IPRO18966 | 3 | 132 0 0  | 0 0 | 2 0 | 1 0 | 3 1 | 0 0 | 21.54 |
| IPRO18969 | 3 | 225 3 1  | 0 0 | 0 0 | 0 0 | 2 0 | 0 0 | 48.2  |
| IPRO18971 | 3 | 126 2 2  | 0 0 | 1 1 | 0 0 | 0 0 | 0 0 | 55.78 |
| IPRO18972 | 3 | 70 0 0   | 0 0 | 1 0 | 1 0 | 3 2 | 1 0 | 43.97 |
| IPRO18976 | 3 | 319 3 3  | 0 0 | 0 0 | 0 0 | 0 0 | 0 0 | 12.16 |
| IPRO18992 | 3 | 14 0 0   | 0 0 | 0 0 | 0 0 | 0 0 | 3 3 | 70.77 |
| IPRO19007 | 3 | 64 0 0   | 0 0 | 0 0 | 0 0 | 1 1 | 2 2 | 37.23 |
| IPRO19017 | 3 | 63 3 3   | 0 0 | 0 0 | 0 0 | 0 0 | 0 0 | 57.49 |
| IPRO19060 | 3 | 112 3 3  | 0 0 | 0 0 | 0 0 | 0 0 | 0 0 | 24.01 |
| IPRO19099 | 3 | 77 2 2   | 0 0 | 0 0 | 0 0 | 0 0 | 1 1 | 33.17 |
| IPRO19108 | 3 | 236 3 3  | 0 0 | 0 0 | 0 0 | 0 0 | 0 0 | 17.23 |
| IPRO19109 | 3 | 108 1 1  | 0 0 | 2 2 | 0 0 | 1 1 | 0 0 | 14.91 |
| IPRO19127 | 3 | 147 4 4  | 0 0 | 0 0 | 0 0 | 0 0 | 0 0 | 7.68  |
| IPRO19141 | 3 | 50 0 0   | 0 0 | 3 3 | 0 0 | 0 0 | 0 0 | 43.86 |
| IPRO19143 | 3 | 65 0 0   | 0 0 | 0 0 | 0 0 | 3 3 | 0 0 | 37.91 |
| IPRO19186 | 3 | 68 0 0   | 0 0 | 0 0 | 0 0 | 0 0 | 3 3 | 25.1  |
| IPRO19198 | 3 | 50 2 2   | 1 1 | 0 0 | 0 0 | 0 0 | 0 0 | 21.21 |
| IPRO19204 | 3 | 51 3 3   | 0 0 | 0 0 | 0 0 | 0 0 | 0 0 | 14.11 |
| IPRO19257 | 3 | 241 2 1  | 0 0 | 0 0 | 0 0 | 2 1 | 0 0 | 27.86 |
| IPRO19273 | 3 | 84 0 0   | 0 0 | 1 1 | 2 2 | 0 0 | 0 0 | 40.09 |
| IPRO19280 | 3 | 85 0 0   | 0 0 | 0 0 | 0 0 | 0 0 | 3 3 | 16.05 |
| IPRO19290 | 3 | 13 3 3   | 0 0 | 0 0 | 0 0 | 0 0 | 0 0 | 13.85 |
| IPRO19308 | 3 | 50 0 0   | 0 0 | 1 1 | 0 0 | 0 0 | 2 2 | 22.43 |
| IPRO19323 | 3 | 73 2 2   | 0 0 | 0 0 | 0 0 | 0 0 | 1 1 | 27.68 |
| IPRO19337 | 3 | 58 0 0   | 0 0 | 1 1 | 0 0 | 0 0 | 2 2 | 25.79 |
| IPRO19345 | 3 | 40 0 0   | 0 0 | 3 3 | 0 0 | 0 0 | 0 0 | 51.92 |
| IPRO19402 | 3 | 235 0 0  | 0 0 | 0 0 | 1 1 | 0 0 | 3 3 | 7.52  |
| IPRO19407 | 3 | 66 0 0   | 0 0 | 1 1 | 0 0 | 1 1 | 1 1 | 26.02 |
| IPRO19412 | 3 | 85 2 2   | 0 0 | 0 0 | 0 0 | 1 1 | 0 0 | 18.51 |
| IPRO19427 | 3 | 257 0 0  | 0 0 | 0 0 | 0 0 | 0 0 | 3 3 | 14.14 |
| IPRO19447 | 3 | 77 0 0   | 0 0 | 1 1 | 0 0 | 2 2 | 0 0 | 48.67 |
| IPRO19458 | 3 | 105 0 0  | 0 0 | 1 1 | 0 0 | 1 1 | 0 0 | 17.87 |
| IPRO19465 | 3 | 65 0 0   | 0 0 | 2 1 | 0 0 | 2 1 | 0 0 | 22.22 |
| IPRO19471 | 3 | 108 0 0  | 0 0 | 0 0 | 0 0 | 0 0 | 3 3 | 27.74 |
| IPRO19485 | 3 | 8 0 0    | 0 0 | 0 0 | 0 0 | 0 0 | 3 3 | 83.08 |
| IPRO19496 | 3 | 71 0 0   | 0 0 | 0 0 | 1 0 | 2 1 | 1 1 | 27.99 |
| IPRO19540 | 3 | 83 0 0   | 0 0 | 0 0 | 0 0 | 1 1 | 2 2 | 23.83 |
| IPRO19543 | 3 | 80 0 0   | 0 0 | 0 0 | 0 0 | 0 0 | 3 3 | 67.13 |
| IPRO19563 | 3 | 88 3 3   | 0 0 | 0 0 | 0 0 | 0 0 | 0 0 | 29.25 |
| IPRO19576 | 3 | 507 1 0  | 0 0 | 3 2 | 0 0 | 1 0 | 1 0 | 47.12 |
| IPRO19585 | 3 | 187 1 1  | 0 0 | 1 0 | 1 0 | 1 0 | 1 0 | 22.67 |
| IPRO19588 | 3 | 12 0 0   | 0 0 | 0 0 | 0 0 | 0 0 | 3 3 | 78.58 |
| IPRO19601 | 3 | 53 0 0   | 0 0 | 1 0 | 0 0 | 1 0 | 3 2 | 26.17 |
| IPRO19665 | 3 | 131 3 3  | 0 0 | 0 0 | 0 0 | 0 0 | 0 0 | 25.44 |
| IPRO20069 | 3 | 782 3 2  | 0 0 | 1 0 | 0 0 | 0 0 | 1 0 | 32.58 |
| IPRO20481 | 3 | 37 3 3   | 0 0 | 0 0 | 0 0 | 0 0 | 0 0 | 28.35 |
| IPRO20542 | 3 | 172 3 2  | 1 0 | 0 0 | 0 0 | 0 0 | 0 0 | 43.06 |
| IPRO20545 | 3 | 174 3 2  | 1 0 | 0 0 | 0 0 | 0 0 | 0 0 | 47.49 |
| IPRO20587 | 3 | 927 1 0  | 2 1 | 1 0 | 1 0 | 1 0 | 2 1 | 51.96 |
| IPRO20685 | 3 | 6 0 0    | 0 0 | 0 0 | 0 0 | 0 0 | 3 3 | 8.54  |
| IPRO20811 | 3 | 1028 1 0 | 1 0 | 2 1 | 1 0 | 2 1 | 1 0 | 54.62 |
| IPRO20850 | 3 | 106 0 0  | 0 0 | 2 0 | 0 0 | 3 1 | 0 0 | 19.68 |
| IPRO20948 | 3 | 232 3 3  | 0 0 | 0 0 | 0 0 | 0 0 | 0 0 | 21.14 |
| IPRO20956 | 3 | 24 0 0   | 0 0 | 0 0 | 0 0 | 3 3 | 0 0 | 51.98 |
| IPRO20958 | 3 | 21 3 3   | 0 0 | 0 0 | 0 0 | 0 0 | 0 0 | 53.91 |
| IPRO20964 | 3 | 5 3 3    | 0 0 | 0 0 | 0 0 | 0 0 | 0 0 | 47.55 |
| IPRO20971 | 3 | 16 0 0   | 0 0 | 3 3 | 0 0 | 0 0 | 0 0 | 53.47 |
| IPRO20992 | 3 | 185 3 3  | 0 0 | 0 0 | 0 0 | 0 0 | 0 0 | 25.11 |
| IPRO21021 | 3 | 54 3 3   | 0 0 | 0 0 | 0 0 | 0 0 | 0 0 | 81.47 |
| IPRO21077 | 3 | 22 3 3   | 0 0 | 0 0 | 0 0 | 0 0 | 0 0 | 28.91 |
| IPRO21090 | 3 | 26 0 0   | 0 0 | 0 0 | 0 0 | 0 0 | 3 3 | 41.48 |
| IPRO21092 | 3 | 69 0 0   | 0 0 | 1 0 | 0 0 | 3 2 | 1 0 | 31.50 |
| IPRO21110 | 3 | 34 0 0   | 0 0 | 0 0 | 0 0 | 0 0 | 3 3 | 26.44 |
| IPRO21124 | 3 | 235 3 3  | 0 0 | 0 0 | 0 0 | 0 0 | 0 0 | 9.86  |
| IPRO21394 | 3 | 42 0 0   | 0 0 | 0 0 | 0 0 | 0 0 | 3 3 | 52    |
| IPRO21397 | 3 | 9 0 0    | 0 0 | 0 0 | 0 0 | 0 0 | 3 3 | 74.01 |
| IPRO21406 | 3 | 25 0 0   | 0 0 | 1 0 | 0 0 | 0 0 | 3 2 | 34.74 |
| IPRO21435 | 3 | 43 3 3   | 0 0 | 0 0 | 0 0 | 0 0 | 0 0 | 55.23 |
| IPRO21614 | 3 | 4 0 0    | 0 0 | 0 0 | 0 0 | 3 3 | 0 0 | 71.99 |
| IPRO21622 | 3 | 55 0 0   | 0 0 | 2 1 | 0 0 | 0 0 | 2 1 | 25.85 |
| IPRO21645 | 3 | 43 0 0   | 0 0 | 0 0 | 0 0 | 0 0 | 3 3 | 76.52 |
| IPRO21648 | 3 | 59 0 0   | 0 0 | 1 0 | 1 0 | 3 2 | 1 0 | 27.41 |
| IPRO21668 | 3 | 32 0 0   | 0 0 | 0 0 | 0 0 | 3 0 | 0 0 | 19.08 |
| IPRO21673 | 3 | 27 0 0   | 0 0 | 0 0 | 0 0 | 0 0 | 3 3 | 38.56 |
| IPRO21715 | 3 | 61 0 0   | 0 0 | 0 0 | 0 0 | 1 1 | 1 1 | 41.8  |
| IPRO21719 | 3 | 92 2 2   | 0 0 | 0 0 | 0 0 | 1 1 | 0 0 | 25.28 |
| IPRO21721 | 3 | 43 0 0   | 0 0 | 3 1 | 2 0 | 2 0 | 3 1 | 47.63 |
| IPRO21744 | 3 | 61 3 3   | 0 0 | 0 0 | 0 0 | 0 0 | 0 0 | 57.71 |
| IPRO21745 | 3 | 6 3 3    | 0 0 | 0 0 | 0 0 | 0 0 | 0 0 | 33.52 |
| IPRO21755 | 3 | 22 0 0   | 0 0 | 0 0 | 0 0 | 3 3 | 0 0 | 70.1  |
| IPRO21756 | 3 | 19 0 0   | 0 0 | 0 0 | 0 0 | 3 3 | 0 0 | 61.3  |
| IPRO21771 | 3 | 105 1 0  | 0 0 | 1 0 | 1 0 | 3 2 | 0 0 | 23.98 |
| IPRO21805 | 3 | 29 0 0   | 0 0 | 0 0 | 0 0 | 0 0 | 3 3 | 48.05 |
| IPRO21816 | 3 | 57 0 0   | 0 0 | 0 0 | 0 0 | 0 0 | 2 2 | 31.3  |
| IPRO21828 | 3 | 166 3 3  | 0 0 | 0 0 | 0 0 | 0 0 | 0 0 | 26.64 |
| IPRO21838 | 3 | 127 0 0  | 0 0 | 0 0 | 0 0 | 3 3 | 0 0 | 35.81 |
| IPRO21839 | 3 | 17 0 0   | 0 0 | 0 0 | 0 0 | 0 0 | 3 3 | 66.06 |
| IPRO21843 | 3 | 63 0 0   | 0 0 | 0 0 | 0 0 | 1 0 | 2 1 | 37.69 |
| IPRO21849 | 3 | 33 0 0   | 0 0 | 0 0 | 0 0 | 0 0 | 3 3 | 46.86 |
| IPRO21850 | 3 | 75 0 0   | 0 0 | 1 0 | 0 0 | 3 2 | 1 0 | 22.91 |
| IPRO21857 | 3 | 54 3 3   | 0 0 | 0 0 | 0 0 | 0 0 | 0 0 | 26.43 |
| IPRO21859 | 3 | 37 0 0   | 0 0 | 0 0 | 0 0 | 0 0 | 3 3 | 35.21 |
| IPRO21861 | 3 | 77 0 0   | 0 0 | 1 1 | 0 0 | 1 1 | 1 1 | 33.63 |
| IPRO21862 | 3 | 37 3 3   | 0 0 | 0 0 | 0 0 | 0 0 | 0 0 | 17.58 |
| IPRO21864 | 3 | 85 0 0   | 0 0 | 3 3 | 0 0 | 0 0 | 0 0 | 38.86 |
| IPRO21887 | 3 | 37 0 0   | 0 0 | 0 0 | 0 0 | 0 0 | 3 3 | 40.16 |
| IPRO21904 | 3 | 61 3 3   | 0 0 | 0 0 | 0 0 | 0 0 | 0 0 | 49.56 |
| IPRO21908 | 3 | 83 3 3   | 0 0 | 0 0 | 0 0 | 0 0 | 0 0 | 41.54 |
| IPRO21917 | 3 | 59 1 1   | 0 0 | 0 0 | 0 0 | 2 1 | 1 0 | 26.98 |
| IPRO21933 | 3 | 72 0 0   | 0 0 | 2 1 | 1 1 | 1 0 | 1 0 | 32.86 |
| IPRO21940 | 3 | 59 0 0   | 0 0 | 3 3 | 0 0 | 0 0 | 0 0 | 44.83 |
| IPRO21944 | 3 | 34 3 3   | 0 0 | 0 0 | 0 0 | 0 0 | 0 0 | 34.14 |
| IPRO21961 | 3 | 55 3 2   | 1 0 | 0 0 | 0 0 | 0 0 | 0 0 | 25.41 |
| IPRO21968 | 3 | 66 3 3   | 0 0 | 0 0 | 0 0 | 0 0 | 0 0 | 58.64 |
| IPRO21976 | 3 | 41 3 3   | 0 0 | 0 0 | 0 0 | 0 0 | 0 0 | 40.4  |
| IPRO21977 | 3 | 48 0 0   | 0 0 | 0 0 | 0 0 | 0 0 | 3 3 | 81.91 |

|                |   |         |     |     |     |     |     |       |
|----------------|---|---------|-----|-----|-----|-----|-----|-------|
| IPRO21995      | 3 | 59 1 0  | 0 0 | 3 2 | 0 0 | 0 0 | 0 0 | 42.96 |
| IPRO22018      | 3 | 37 0 0  | 0 0 | 0 0 | 0 0 | 0 0 | 3 3 | 45.54 |
| IPRO22021      | 3 | 48 0 0  | 0 0 | 1 0 | 0 0 | 0 0 | 2 1 | 28.86 |
| IPRO22034      | 3 | 35 0 0  | 0 0 | 0 0 | 0 0 | 3 0 | 3 3 | 64.07 |
| IPRO22038      | 3 | 28 3 3  | 0 0 | 0 0 | 0 0 | 0 0 | 0 0 | 25.13 |
| IPRO22044      | 3 | 34 3 3  | 0 0 | 0 0 | 0 0 | 0 0 | 0 0 | 25.72 |
| IPRO22066      | 3 | 77 3 3  | 0 0 | 0 0 | 0 0 | 0 0 | 0 0 | 25.19 |
| IPRO22103      | 3 | 14 0 0  | 0 0 | 0 0 | 0 0 | 0 0 | 3 3 | 59.86 |
| IPRO22104      | 3 | 45 3 3  | 0 0 | 0 0 | 0 0 | 0 0 | 0 0 | 13.44 |
| IPRO22107      | 3 | 72 3 3  | 0 0 | 0 0 | 0 0 | 0 0 | 0 0 | 32.33 |
| IPRO22112      | 3 | 330 3 2 | 1 0 | 0 0 | 0 0 | 0 0 | 0 0 | 19.39 |
| IPRO22113      | 3 | 47 0 0  | 0 0 | 2 2 | 0 0 | 0 0 | 1 1 | 20.95 |
| IPRO22137      | 3 | 51 0 0  | 0 0 | 0 0 | 0 0 | 0 0 | 3 3 | 34.38 |
| IPRO22156      | 3 | 84 3 3  | 0 0 | 0 0 | 0 0 | 0 0 | 0 0 | 40.71 |
| IPRO22172      | 3 | 43 3 3  | 0 0 | 0 0 | 0 0 | 0 0 | 0 0 | 31.62 |
| IPRO22225      | 3 | 31 3 3  | 0 0 | 0 0 | 0 0 | 0 0 | 0 0 | 41.27 |
| IPRO22228      | 3 | 45 0 0  | 0 0 | 3 3 | 0 0 | 0 0 | 0 0 | 38.94 |
| IPRO22251      | 3 | 68 0 0  | 0 0 | 3 3 | 0 0 | 0 0 | 0 0 | 38.86 |
| IPRO22255      | 3 | 18 0 0  | 0 0 | 0 0 | 0 0 | 0 0 | 3 3 | 31.89 |
| IPRO22413      | 3 | 166 1 0 | 0 0 | 0 0 | 1 0 | 0 0 | 3 2 | 43.46 |
| IPRO22414      | 3 | 287 1 0 | 0 0 | 0 0 | 1 0 | 0 0 | 3 2 | 29.64 |
| IPRO22417      | 3 | 783 3 1 | 2 0 | 1 0 | 1 0 | 1 0 | 1 0 | 42    |
| IPRO22418      | 3 | 759 2 1 | 2 1 | 1 0 | 1 0 | 1 0 | 1 0 | 29.68 |
| PD013253       | 3 | 6 1 1   | 0 0 | 0 0 | 0 0 | 0 0 | 2 2 | 68.67 |
| PD0503580      | 3 | 4 3 3   | 0 0 | 0 0 | 0 0 | 0 0 | 0 0 | 49.51 |
| PF01316        | 3 | 488 3 3 | 0 0 | 0 0 | 0 0 | 0 0 | 0 0 | 31.76 |
| PF03403        | 3 | 210 4 4 | 0 0 | 0 0 | 0 0 | 0 0 | 0 0 | 15.13 |
| PF03896        | 3 | 85 0 0  | 0 0 | 0 0 | 0 0 | 0 0 | 3 3 | 24.6  |
| PF04047        | 3 | 69 0 0  | 0 0 | 2 0 | 0 0 | 2 0 | 3 1 | 35.34 |
| PF04350        | 3 | 215 1 0 | 0 0 | 3 2 | 0 0 | 0 0 | 0 0 | 18.02 |
| PF05065        | 3 | 409 3 3 | 0 0 | 0 0 | 0 0 | 0 0 | 0 0 | 7     |
| PF05253        | 3 | 172 0 0 | 0 0 | 2 0 | 2 0 | 2 0 | 4 2 | 36.4  |
| PF05648        | 3 | 181 0 0 | 0 0 | 0 0 | 0 0 | 3 3 | 0 0 | 10.45 |
| PF05708        | 3 | 180 1 1 | 0 0 | 0 0 | 1 1 | 0 0 | 1 1 | 8.29  |
| PF05873        | 3 | 89 0 0  | 0 0 | 0 0 | 0 0 | 2 2 | 0 0 | 27.85 |
| PF06003        | 3 | 46 0 0  | 0 0 | 0 0 | 0 0 | 0 0 | 3 3 | 19.47 |
| PF06333        | 3 | 79 0 0  | 0 0 | 1 1 | 0 0 | 1 0 | 3 2 | 17.84 |
| PF06382        | 3 | 67 0 0  | 0 0 | 0 0 | 0 0 | 0 0 | 3 3 | 24.74 |
| PF06561        | 3 | 54 0 0  | 0 0 | 0 0 | 0 0 | 3 3 | 0 0 | 25.96 |
| PF06747        | 3 | 330 0 0 | 0 0 | 0 0 | 0 0 | 1 1 | 2 2 | 17.15 |
| PF07036        | 3 | 41 0 0  | 0 0 | 3 3 | 0 0 | 0 0 | 0 0 | 30.07 |
| PF07304        | 3 | 53 0 0  | 0 0 | 2 0 | 0 0 | 3 1 | 0 0 | 29.73 |
| PF08007        | 3 | 181 0 0 | 0 0 | 2 2 | 1 0 | 1 0 | 0 0 | 12.32 |
| PF08304        | 3 | 32 0 0  | 0 0 | 0 0 | 0 0 | 3 3 | 0 0 | 55.48 |
| PF08394        | 3 | 19 0 0  | 3 3 | 0 0 | 0 0 | 0 0 | 0 0 | 43.13 |
| PF08406        | 3 | 154 3 2 | 1 0 | 0 0 | 0 0 | 0 0 | 0 0 | 28.92 |
| PF09248        | 3 | 17 0 0  | 0 0 | 0 0 | 0 0 | 3 3 | 0 0 | 31.99 |
| PF09341        | 3 | 99 0 0  | 0 0 | 2 2 | 0 0 | 0 0 | 1 1 | 16.13 |
| PF09722        | 3 | 290 3 3 | 0 0 | 0 0 | 0 0 | 0 0 | 0 0 | 16.81 |
| PF09816        | 3 | 75 0 0  | 0 0 | 0 0 | 0 0 | 0 0 | 0 0 | 23.54 |
| PF09922        | 3 | 214 3 3 | 0 0 | 0 0 | 0 0 | 0 0 | 0 0 | 7.73  |
| PF10068        | 3 | 78 3 3  | 0 0 | 0 0 | 0 0 | 0 0 | 0 0 | 32.16 |
| PF10469        | 3 | 35 0 0  | 0 0 | 2 0 | 0 0 | 0 0 | 5 3 | 26.63 |
| PF10947        | 3 | 129 3 3 | 0 0 | 0 0 | 0 0 | 0 0 | 0 0 | 10.81 |
| PF11104        | 3 | 291 3 3 | 0 0 | 0 0 | 0 0 | 0 0 | 0 0 | 17.36 |
| PF11569        | 3 | 18 2 2  | 0 0 | 0 0 | 0 0 | 1 1 | 0 0 | 40.71 |
| PF11774        | 3 | 153 3 3 | 0 0 | 0 0 | 0 0 | 0 0 | 0 0 | 30.71 |
| PF11842        | 3 | 206 3 0 | 3 0 | 2 0 | 0 0 | 0 0 | 0 0 | 40.56 |
| PF11875        | 3 | 63 0 0  | 0 0 | 3 2 | 1 0 | 1 0 | 1 0 | 31.48 |
| PF11879        | 3 | 41 0 0  | 0 0 | 0 0 | 0 0 | 0 0 | 3 3 | 43.8  |
| PF11940        | 3 | 324 2 1 | 0 0 | 2 1 | 1 0 | 0 0 | 3 0 | 30.5  |
| PF11953        | 3 | 266 3 3 | 0 0 | 0 0 | 0 0 | 0 0 | 0 0 | 34.9  |
| PF11980        | 3 | 46 0 0  | 0 0 | 0 0 | 0 0 | 0 0 | 3 3 | 54.01 |
| PF12022        | 3 | 51 0 0  | 0 0 | 1 0 | 1 0 | 1 0 | 3 2 | 31.86 |
| PF12032        | 3 | 144 0 0 | 0 0 | 0 0 | 0 0 | 0 0 | 4 4 | 18.1  |
| PF12051        | 3 | 185 3 3 | 0 0 | 0 0 | 0 0 | 0 0 | 0 0 | 11.49 |
| PF12114        | 3 | 41 0 0  | 0 0 | 0 0 | 0 0 | 0 0 | 3 3 | 33.24 |
| PF12137        | 3 | 144 3 3 | 0 0 | 0 0 | 0 0 | 0 0 | 0 0 | 49    |
| PF12147        | 3 | 76 3 3  | 0 0 | 0 0 | 0 0 | 0 0 | 0 0 | 49.02 |
| PF12152        | 3 | 32 0 0  | 0 0 | 0 0 | 0 0 | 3 3 | 0 0 | 40.89 |
| PF12161        | 3 | 687 3 2 | 1 0 | 0 0 | 0 0 | 0 0 | 0 0 | 13.52 |
| PF12210        | 3 | 30 0 0  | 0 0 | 0 0 | 0 0 | 0 0 | 3 3 | 66.66 |
| PF12213        | 3 | 34 0 0  | 0 0 | 3 2 | 0 0 | 0 0 | 2 1 | 37.4  |
| PF12215        | 3 | 118 1 0 | 1 0 | 1 0 | 0 0 | 1 1 | 2 1 | 25.1  |
| PF12217        | 3 | 5 3 3   | 0 0 | 0 0 | 0 0 | 0 0 | 0 0 | 99.85 |
| PF12218        | 3 | 11 3 3  | 0 0 | 0 0 | 0 0 | 0 0 | 0 0 | 43.61 |
| PF12219        | 3 | 7 3 3   | 0 0 | 0 0 | 0 0 | 0 0 | 0 0 | 55.72 |
| PF12327        | 3 | 31 2 1  | 1 0 | 2 1 | 0 0 | 0 0 | 0 0 | 15.11 |
| PF12348        | 3 | 275 0 0 | 0 0 | 0 0 | 0 0 | 1 0 | 4 2 | 7.75  |
| PF12369        | 3 | 17 0 0  | 0 0 | 0 0 | 0 0 | 0 0 | 3 3 | 56.62 |
| PF12372        | 3 | 36 0 0  | 0 0 | 0 0 | 0 0 | 0 0 | 3 3 | 26.37 |
| PF12431        | 3 | 95 3 3  | 0 0 | 0 0 | 0 0 | 0 0 | 0 0 | 37.22 |
| PF12434        | 3 | 42 3 3  | 0 0 | 0 0 | 0 0 | 0 0 | 0 0 | 71.95 |
| PF12556        | 3 | 80 3 3  | 0 0 | 0 0 | 0 0 | 0 0 | 0 0 | 49.2  |
| PF12557        | 3 | 170 3 2 | 0 0 | 1 0 | 0 0 | 0 0 | 0 0 | 41.67 |
| PF12612        | 3 | 62 0 0  | 0 0 | 1 1 | 0 0 | 1 1 | 1 1 | 20.11 |
| PTHR10032-SF30 | 3 | 5 0 0   | 0 0 | 0 0 | 0 0 | 0 0 | 3 3 | 90.5  |
| PTHR10044      | 3 | 24 0 0  | 0 0 | 1 1 | 0 0 | 1 1 | 1 1 | 44.5  |
| PTHR10066      | 3 | 66 3 1  | 2 0 | 0 0 | 0 0 | 2 0 | 1 0 | 11.3  |
| PTHR10066-SF12 | 3 | 90 3 1  | 0 0 | 0 0 | 0 0 | 2 0 | 2 0 | 26.83 |
| PTHR10099      | 3 | 47 2 2  | 0 0 | 1 1 | 0 0 | 0 0 | 0 0 | 42.7  |
| PTHR10159      | 3 | 7 0 0   | 0 0 | 0 0 | 0 0 | 0 0 | 2 2 | 10.75 |
| PTHR10169      | 3 | 5 3 3   | 0 0 | 0 0 | 0 0 | 0 0 | 0 0 | 9.46  |
| PTHR10178-SF17 | 3 | 203 0 0 | 0 0 | 4 4 | 0 0 | 0 0 | 0 0 | 25.33 |
| PTHR10288      | 3 | 5 0 0   | 0 0 | 1 1 | 1 1 | 1 1 | 0 0 | 38.97 |
| PTHR10333      | 3 | 8 0 0   | 0 0 | 0 0 | 0 0 | 0 0 | 3 3 | 43.86 |
| PTHR10333-SF4  | 3 | 7 0 0   | 0 0 | 0 0 | 0 0 | 0 0 | 3 3 | 87.06 |
| PTHR10420      | 3 | 5 0 0   | 0 0 | 0 0 | 0 0 | 0 0 | 3 3 | 7.16  |
| PTHR10489      | 3 | 13 2 1  | 0 0 | 0 0 | 0 0 | 0 0 | 2 1 | 4.19  |
| PTHR10499-SF65 | 3 | 44 3 3  | 0 0 | 0 0 | 0 0 | 0 0 | 0 0 | 43.39 |
| PTHR10499-SF80 | 3 | 5 3 3   | 0 0 | 0 0 | 0 0 | 0 0 | 0 0 | 38.61 |
| PTHR10499-SF86 | 3 | 27 3 3  | 0 0 | 0 0 | 0 0 | 0 0 | 0 0 | 15.83 |
| PTHR10499-SF94 | 3 | 4 3 3   | 0 0 | 0 0 | 0 0 | 0 0 | 0 0 | 41.96 |
| PTHR10527      | 3 | 63 0 0  | 0 0 | 3 1 | 1 0 | 2 0 | 2 0 | 10.58 |
| PTHR10584      | 3 | 3 2 2   | 0 0 | 0 0 | 0 0 | 1 1 | 0 0 | 23.14 |
| PTHR10593-SF10 | 3 | 76 0 0  | 0 0 | 3 2 | 0 0 | 0 0 | 1 0 | 57.73 |
| PTHR10617-SF7  | 3 | 7 1 0   | 3 2 | 0 0 | 0 0 | 0 0 | 0 0 | 16.11 |
| PTHR10827      | 3 | 81 2 1  | 0 0 | 0 0 | 0 0 | 1 0 | 0 0 | 37.46 |
| PTHR10963      | 3 | 17 2 2  | 1 1 | 0 0 | 0 0 | 0 0 | 0 0 | 24.2  |
| PTHR11005      | 3 | 102 2 1 | 0 0 | 2 0 | 1 0 | 1 0 | 1 0 | 18.34 |
| PTHR11107-SF5  | 3 | 9 3 0   | 3 0 | 0 0 | 0 0 | 0 0 | 0 0 | 48.35 |
| PTHR11113      | 3 | 179 3 1 | 1 0 | 1 0 | 0 0 | 1 0 | 0 0 | 16.86 |
| PTHR11117      | 3 | 34 3 2  | 1 0 | 0 0 | 0 0 | 0 0 | 0 0 | 36.67 |
| PTHR11200      | 3 | 8 0 0   | 0 0 | 3 3 | 0 0 | 0 0 | 0 0 | 9.58  |
| PTHR11271-SF7  | 3 | 19 3 3  | 0 0 | 0 0 | 0 0 | 0 0 | 0 0 | 31.77 |
| PTHR11452      | 3 | 23 3 3  | 0 0 | 0 0 | 0 0 | 0 0 | 0 0 | 25.73 |
| PTHR11640      | 3 | 10 0 0  | 0 0 | 0 0 | 0 0 | 0 0 | 3 3 | 66.42 |
| PTHR11647      | 3 | 28 3 2  | 1 0 | 0 0 | 0 0 | 0 0 | 0 0 | 24.53 |
| PTHR11669      | 3 | 285 2 2 | 0 0 | 0 0 | 0 0 | 0 0 | 0 0 | 23.15 |
| PTHR11731      | 3 | 10 3 3  | 0 0 | 0 0 | 0 0 | 0 0 | 0 0 | 8.26  |
| PTHR11751      | 3 | 35 1 1  | 0 0 | 0 0 | 0 0 | 1 1 | 1 1 | 7.05  |
| PTHR11908-SF4  | 3 | 5 3 3   | 0 0 | 0 0 | 0 0 | 0 0 | 0 0 | 47.66 |
| PTHR11915      | 3 | 6 1 1   | 0 0 | 0 0 | 0 0 | 1 1 | 1 1 | 22.12 |
| PTHR12197      | 3 | 24 0 0  | 0 0 | 0 0 | 1 0 | 2 0 | 3 1 | 17.61 |
| PTHR12473      | 3 | 62 0 0  | 0 0 | 1 1 | 0 0 | 0 0 | 0 0 | 31.84 |
| PTHR12546      | 3 | 3 0 0   | 0 0 | 2 2 | 1 1 | 0 0 | 0 0 | 16.89 |
| PTHR12558-SF11 | 3 | 10 3 2  | 0 0 | 0 0 | 0 0 | 0 0 | 1 0 | 10.55 |
| PTHR12622      | 3 | 3 0 0   | 0 0 | 0 0 | 0 0 | 0 0 | 3 3 | 16.4  |
| PTHR12749      | 3 | 20 3 3  | 0 0 | 0 0 | 0 0 | 0 0 | 0 0 | 35.12 |
| PTHR12848-SF5  | 3 | 5 0 0   | 0 0 | 3 3 | 0 0 | 0 0 | 0 0 | 74.48 |
| PTHR13182      | 3 | 64 0 0  | 0 0 | 0 0 | 1 1 | 2 0 | 0 0 | 32.72 |
| PTHR13723      | 3 | 5 0 0   | 0 0 | 0 0 | 0 0 | 0 0 | 3 3 | 8.45  |
| PTHR13734      | 3 | 5 3 3   | 0 0 | 0 0 | 0 0 | 0 0 | 0 0 | 12.34 |
| PTHR13789-SF5  | 3 | 10 2 1  | 0 0 | 0 0 | 0 0 | 2 1 | 0 0 | 27.68 |
| PTHR13847      | 3 | 15 3 2  | 1 0 | 0 0 | 0 0 | 1 0 | 0 0 | 10.37 |
| PTHR13871      | 3 | 8 0 0   | 0 0 | 3 3 | 0 0 | 0 0 | 0 0 | 26.07 |
| PTHR13919      | 3 | 4 0 0   | 0 0 | 0 0 | 0 0 | 0 0 | 3 3 | 58.44 |
| PTHR14025-SF2  | 3 | 4 3 3   | 0 0 | 0 0 | 0 0 | 0 0 | 0 0 | 47    |
| PTHR14218      | 3 | 41 4 3  | 1 0 | 0 0 | 0 0 | 1 0 | 1 0 | 34.26 |
| PTHR14453      | 3 | 8 0 0   | 0 0 | 0 0 | 0 0 | 0 0 | 3 3 | 34.47 |
| PTHR14453-SF16 | 3 | 8 0 0   | 0 0 | 0 0 | 0 0 | 0 0 | 3 3 | 43.55 |
| PTHR14493      | 3 | 10 0 0  | 0 0 | 1 1 | 2 2 | 0 0 | 0 0 | 18.5  |
| PTHR15182      | 3 | 10 2 2  | 0 0 | 0 0 | 0 0 | 0 0 | 0 0 | 35.68 |
| PTHR15242      | 3 | 32 0 0  | 0 0 | 1 1 | 0 0 | 0 0 | 2 2 | 33.44 |
| PTHR15704      | 3 | 12 0 0  | 0 0 | 0 0 | 0 0 | 0 0 | 3 3 | 38.72 |
| PTHR15730      | 3 | 42 2 2  | 0 0 | 0 0 | 0 0 | 0 0 | 0 0 | 34.55 |
| PTHR17598      | 3 | 8 3 3   | 0 0 | 0 0 | 0 0 | 0 0 | 0 0 | 100   |

|                 |   |          |     |     |     |     |     |       |
|-----------------|---|----------|-----|-----|-----|-----|-----|-------|
| PTHR17598-SF1   | 3 | 4 3 3    | 0 0 | 0 0 | 0 0 | 0 0 | 0 0 | 100   |
| PTHR18973       | 3 | 3 1 1    | 0 0 | 1 1 | 0 0 | 0 0 | 1 1 | 8.42  |
| PTHR18976       | 3 | 14 3 3   | 0 0 | 0 0 | 0 0 | 0 0 | 0 0 | 9.27  |
| PTHR19241-SF10  | 3 | 21 0 0   | 0 0 | 3 3 | 0 0 | 3 0 | 0 0 | 33.63 |
| PTHR19242       | 3 | 41 1 1   | 0 0 | 1 1 | 1 1 | 0 0 | 0 0 | 4.38  |
| PTHR19418       | 3 | 18 0 0   | 0 0 | 1 1 | 0 0 | 0 0 | 0 0 | 13.03 |
| PTHR19959-SF21  | 3 | 14 1 1   | 2 0 | 2 0 | 0 0 | 0 0 | 0 0 | 12.26 |
| PTHR20930       | 3 | 37 0 0   | 0 0 | 2 0 | 0 0 | 0 0 | 3 1 | 34.75 |
| PTHR20961       | 3 | 39 2 2   | 0 0 | 0 0 | 0 0 | 0 0 | 0 0 | 29.06 |
| PTHR21091       | 3 | 8 3 3    | 0 0 | 0 0 | 0 0 | 0 0 | 0 0 | 10.84 |
| PTHR21180-SF4   | 3 | 36 3 2   | 1 0 | 0 0 | 0 0 | 0 0 | 0 0 | 32.35 |
| PTHR21222       | 3 | 27 2 2   | 0 0 | 0 0 | 0 0 | 0 0 | 1 1 | 36.12 |
| PTHR22075       | 3 | 13 0 0   | 0 0 | 0 0 | 0 0 | 0 0 | 0 0 | 68.5  |
| PTHR22556       | 3 | 21 0 0   | 0 0 | 0 0 | 0 0 | 0 0 | 3 3 | 82.02 |
| PTHR22572-SF7   | 3 | 13 1 1   | 0 0 | 1 0 | 0 0 | 0 0 | 2 1 | 17.29 |
| PTHR22767-SF2   | 3 | 9 0 0    | 0 0 | 0 0 | 1 1 | 0 0 | 2 2 | 19.85 |
| PTHR22904-SF15  | 3 | 14 0 0   | 0 0 | 2 2 | 0 0 | 0 0 | 1 1 | 38.71 |
| PTHR22912       | 3 | 18 1 0   | 2 2 | 1 0 | 0 0 | 0 0 | 1 0 | 27.71 |
| PTHR22955       | 3 | 99 0 0   | 0 0 | 0 0 | 0 0 | 0 0 | 3 3 | 13.52 |
| PTHR22963       | 3 | 6 0 0    | 0 0 | 0 0 | 0 0 | 0 0 | 3 3 | 57.12 |
| PTHR22963-SF13  | 3 | 14 0 0   | 0 0 | 0 0 | 0 0 | 0 0 | 3 3 | 50.4  |
| PTHR22979       | 3 | 35 0 0   | 0 0 | 0 0 | 0 0 | 0 0 | 3 3 | 31.29 |
| PTHR22979-SF1   | 3 | 121 2 1  | 0 0 | 0 0 | 0 0 | 0 0 | 2 1 | 34.6  |
| PTHR23022-SF10  | 3 | 69 2 1   | 0 0 | 0 0 | 0 0 | 2 1 | 0 0 | 24.78 |
| PTHR23022-SF9   | 3 | 137 1 1  | 0 0 | 0 0 | 0 0 | 2 1 | 1 0 | 32.23 |
| PTHR23055       | 3 | 47 2 1   | 0 0 | 1 0 | 0 0 | 2 1 | 0 0 | 18.54 |
| PTHR23082       | 3 | 22 0 0   | 0 0 | 0 0 | 0 0 | 0 0 | 3 1 | 31.57 |
| PTHR23083-SF1   | 3 | 17 3 3   | 0 0 | 0 0 | 0 0 | 0 0 | 0 0 | 24.35 |
| PTHR23125-SF36  | 3 | 6 0 0    | 0 0 | 3 3 | 0 0 | 0 0 | 0 0 | 47.52 |
| PTHR23154-SF51  | 3 | 31 2 2   | 0 0 | 0 0 | 1 1 | 0 0 | 0 0 | 10.38 |
| PTHR23155-SF33  | 3 | 32 0 0   | 0 0 | 3 3 | 0 0 | 0 0 | 0 0 | 31.66 |
| PTHR23224-SF459 | 3 | 143 0 0  | 0 0 | 0 0 | 0 0 | 0 0 | 3 2 | 35.87 |
| PTHR23224-SF61  | 3 | 19 0 0   | 0 0 | 0 0 | 0 0 | 0 0 | 3 3 | 18.54 |
| PTHR23224-SF6   | 3 | 37 0 0   | 0 0 | 1 0 | 0 0 | 0 0 | 3 2 | 13.57 |
| PTHR23233       | 3 | 17 0 0   | 0 0 | 0 0 | 0 0 | 0 0 | 3 3 | 31.64 |
| PTHR23241-SF11  | 3 | 79 3 2   | 0 0 | 1 0 | 0 0 | 0 0 | 0 0 | 14.24 |
| PTHR23278       | 3 | 12 0 0   | 0 0 | 0 0 | 0 0 | 0 0 | 3 3 | 18.36 |
| PTHR23233       | 3 | 16 0 0   | 0 0 | 1 1 | 0 0 | 0 0 | 1 1 | 14.55 |
| PTHR23348       | 3 | 17 2 2   | 0 0 | 0 0 | 0 0 | 0 0 | 1 1 | 47.87 |
| TIGR01490       | 3 | 243 3 3  | 0 0 | 0 0 | 0 0 | 0 0 | 0 0 | 22.38 |
| TIGR01784       | 3 | 284 3 2  | 1 0 | 0 0 | 0 0 | 0 0 | 0 0 | 17.8  |
| TIGR02136       | 3 | 311 3 2  | 1 0 | 0 0 | 0 0 | 0 0 | 0 0 | 27.59 |
| TIGR02231       | 3 | 72 1 1   | 0 0 | 0 0 | 0 0 | 2 2 | 0 0 | 13.74 |
| TIGR02353       | 3 | 59 3 1   | 0 0 | 0 0 | 0 0 | 2 0 | 0 0 | 32.52 |
| TIGR02778       | 3 | 24 3 3   | 0 0 | 0 0 | 0 0 | 0 0 | 0 0 | 32.92 |
| TIGR02795       | 3 | 282 4 4  | 0 0 | 0 0 | 0 0 | 0 0 | 0 0 | 25.79 |
| TIGR02971       | 3 | 42 3 3   | 0 0 | 0 0 | 0 0 | 0 0 | 0 0 | 40.4  |
| TIGR03062       | 3 | 115 3 2  | 1 0 | 0 0 | 0 0 | 0 0 | 0 0 | 25.24 |
| TIGR03407       | 3 | 160 3 3  | 0 0 | 0 0 | 0 0 | 0 0 | 0 0 | 57.56 |
| IPR000072       | 4 | 114 0 0  | 0 0 | 1 1 | 0 0 | 0 0 | 3 3 | 31.56 |
| IPR000119       | 4 | 2084 3 3 | 0 0 | 1 1 | 0 0 | 0 0 | 0 0 | 32.46 |
| IPR0000228      | 4 | 247 0 0  | 0 0 | 1 1 | 0 0 | 4 4 | 1 1 | 22.32 |
| IPR000266       | 4 | 986 0 0  | 0 0 | 2 2 | 0 0 | 2 2 | 0 0 | 40.77 |
| IPR000299       | 4 | 19 0 0   | 0 0 | 0 0 | 0 0 | 0 0 | 3 3 | 4.3   |
| IPR000347       | 4 | 65 0 0   | 0 0 | 4 4 | 0 0 | 0 0 | 0 0 | 53.79 |
| IPR000392       | 4 | 427 4 2  | 2 0 | 0 0 | 0 0 | 0 0 | 0 0 | 40.44 |
| IPR000395       | 4 | 20 4 4   | 0 0 | 0 0 | 0 0 | 0 0 | 0 0 | 41.27 |
| IPR000398       | 4 | 673 0 0  | 0 0 | 2 1 | 1 0 | 2 2 | 0 0 | 41.6  |
| IPR000435       | 4 | 129 0 0  | 0 0 | 0 0 | 0 0 | 0 0 | 4 4 | 23.87 |
| IPR000442       | 4 | 70 2 1   | 0 0 | 3 2 | 0 0 | 0 0 | 0 0 | 12.5  |
| IPR000506       | 4 | 768 1 0  | 3 2 | 1 0 | 1 0 | 1 0 | 1 0 | 45.23 |
| IPR000517       | 4 | 902 0 0  | 0 0 | 1 0 | 1 0 | 3 2 | 1 0 | 27.12 |
| IPR000566       | 4 | 444 0 0  | 0 0 | 0 0 | 0 0 | 0 0 | 4 4 | 8.96  |
| IPR000581       | 4 | 1402 2 2 | 2 2 | 0 0 | 0 0 | 0 0 | 0 0 | 36.03 |
| IPR000593       | 4 | 82 0 0   | 0 0 | 0 0 | 0 0 | 3 0 | 4 1 | 28.24 |
| IPR000607       | 4 | 44 0 0   | 1 1 | 0 0 | 0 0 | 0 0 | 3 3 | 28.66 |
| IPR000631       | 4 | 805 2 1  | 0 0 | 2 2 | 0 0 | 1 0 | 0 0 | 24.99 |
| IPR000648       | 4 | 460 0 0  | 0 0 | 1 0 | 1 0 | 4 2 | 2 0 | 23.06 |
| IPR000671       | 4 | 490 4 4  | 0 0 | 0 0 | 0 0 | 0 0 | 0 0 | 15.67 |
| IPR000774       | 4 | 489 3 2  | 0 0 | 2 1 | 0 0 | 0 0 | 0 0 | 23.67 |
| IPR000783       | 4 | 156 0 0  | 0 0 | 1 0 | 1 0 | 3 2 | 1 0 | 51.08 |
| IPR000900       | 4 | 1104 0 0 | 0 0 | 0 0 | 0 0 | 0 0 | 4 4 | 18.04 |
| IPR000918       | 4 | 988 2 1  | 0 0 | 1 1 | 1 0 | 0 0 | 0 0 | 28.37 |
| IPR000967       | 4 | 201 0 0  | 0 0 | 1 1 | 1 0 | 2 1 | 2 1 | 54.19 |
| IPR001003       | 4 | 254 0 0  | 0 0 | 0 0 | 0 0 | 0 0 | 4 4 | 43.83 |
| IPR001026       | 4 | 56 0 0   | 0 0 | 2 2 | 0 0 | 0 0 | 3 3 | 17.36 |
| IPR001130       | 4 | 1513 1 1 | 0 0 | 1 1 | 0 0 | 1 1 | 1 1 | 25.22 |
| IPR001147       | 4 | 158 0 0  | 0 0 | 3 2 | 0 0 | 0 0 | 2 1 | 43.86 |
| IPR001328       | 4 | 856 4 4  | 0 0 | 0 0 | 0 0 | 0 0 | 0 0 | 34.3  |
| IPR001352       | 4 | 1013 2 2 | 0 0 | 1 1 | 0 0 | 1 1 | 0 0 | 32.47 |
| IPR001372       | 4 | 288 0 0  | 0 0 | 0 0 | 0 0 | 0 0 | 4 4 | 31.96 |
| IPR001515       | 4 | 163 0 0  | 1 1 | 0 0 | 0 0 | 1 1 | 1 1 | 46.19 |
| IPR001533       | 4 | 557 2 2  | 0 0 | 0 0 | 0 0 | 1 1 | 0 0 | 25.49 |
| IPR001543       | 4 | 1147 3 3 | 0 0 | 1 1 | 0 0 | 0 0 | 0 0 | 19.31 |
| IPR001554       | 4 | 121 1 1  | 0 0 | 0 0 | 0 0 | 0 0 | 0 0 | 42.59 |
| IPR001640       | 4 | 898 3 3  | 0 0 | 1 1 | 0 0 | 0 0 | 0 0 | 24.82 |
| IPR001772       | 4 | 154 0 0  | 0 0 | 4 1 | 0 0 | 2 0 | 3 0 | 34.2  |
| IPR001790       | 4 | 1052 0 0 | 1 0 | 2 1 | 1 0 | 1 0 | 3 2 | 20.77 |
| IPR001931       | 4 | 102 0 0  | 0 0 | 0 0 | 0 0 | 3 3 | 1 1 | 56.43 |
| IPR001950       | 4 | 539 0 0  | 0 0 | 3 1 | 0 0 | 1 0 | 2 1 | 24.94 |
| IPR001951       | 4 | 202 0 0  | 0 0 | 0 0 | 0 0 | 1 1 | 3 3 | 85.34 |
| IPR002010       | 4 | 587 3 3  | 0 0 | 1 1 | 0 0 | 0 0 | 0 0 | 19.88 |
| IPR002019       | 4 | 381 3 0  | 1 0 | 3 0 | 0 0 | 4 1 | 3 0 | 53.92 |
| IPR002026       | 4 | 383 1 0  | 1 0 | 3 0 | 0 0 | 4 1 | 3 0 | 58.75 |
| IPR002092       | 4 | 119 0 0  | 0 0 | 2 2 | 0 0 | 0 0 | 2 2 | 38.13 |
| IPR002113       | 4 | 2823 0 0 | 0 0 | 3 3 | 0 0 | 0 0 | 1 1 | 22.92 |
| IPR002154       | 4 | 35 0 0   | 0 0 | 0 0 | 0 0 | 0 0 | 4 4 | 54.53 |
| IPR002157       | 4 | 38 0 0   | 0 0 | 0 0 | 0 0 | 0 0 | 1 1 | 28.27 |
| IPR002187       | 4 | 1105 1 0 | 2 1 | 2 2 | 0 0 | 0 0 | 0 0 | 39.66 |
| IPR002421       | 4 | 934 4 4  | 0 0 | 0 0 | 0 0 | 0 0 | 0 0 | 34.75 |
| IPR002466       | 4 | 145 0 0  | 0 0 | 1 1 | 0 0 | 1 1 | 2 2 | 26.81 |
| IPR002565       | 4 | 822 4 3  | 0 0 | 0 0 | 0 0 | 0 0 | 0 0 | 35.57 |
| IPR002624       | 4 | 384 3 2  | 0 0 | 0 0 | 0 0 | 0 0 | 2 1 | 21.26 |
| IPR002636       | 4 | 256 4 4  | 0 0 | 0 0 | 0 0 | 0 0 | 0 0 | 27.48 |
| IPR002637       | 4 | 895 4 4  | 0 0 | 0 0 | 0 0 | 0 0 | 0 0 | 32.13 |
| IPR002655       | 4 | 286 4 2  | 0 0 | 2 0 | 0 0 | 2 0 | 2 0 | 14.49 |
| IPR002657       | 4 | 1058 4 4 | 0 0 | 0 0 | 0 0 | 0 0 | 0 0 | 15.96 |
| IPR002659       | 4 | 536 0 0  | 0 0 | 3 3 | 0 0 | 0 0 | 0 0 | 19.23 |
| IPR002676       | 4 | 736 1 0  | 0 0 | 3 2 | 1 1 | 0 0 | 0 0 | 19.74 |
| IPR002715       | 4 | 318 0 0  | 1 0 | 2 1 | 0 0 | 3 2 | 1 0 | 25.49 |
| IPR002716       | 4 | 1714 3 3 | 2 2 | 0 0 | 0 0 | 0 0 | 0 0 | 4.41  |
| IPR002719       | 4 | 43 0 0   | 0 0 | 2 0 | 0 0 | 0 0 | 4 2 | 37.77 |
| IPR002728       | 4 | 195 0 0  | 0 0 | 3 3 | 0 0 | 1 1 | 0 0 | 22.34 |
| IPR002735       | 4 | 242 0 0  | 1 1 | 1 0 | 1 0 | 2 1 | 1 0 | 35.88 |
| IPR002737       | 4 | 241 2 2  | 0 0 | 1 1 | 0 0 | 1 1 | 0 0 | 24.36 |
| IPR002748       | 4 | 249 4 4  | 0 0 | 0 0 | 0 0 | 0 0 | 0 0 | 28.96 |
| IPR002751       | 4 | 311 3 2  | 2 1 | 0 0 | 0 0 | 0 0 | 0 0 | 25.49 |
| IPR002821       | 4 | 614 3 1  | 2 0 | 2 0 | 2 0 | 3 1 | 2 0 | 23.41 |
| IPR002836       | 4 | 130 0 0  | 0 0 | 0 0 | 0 0 | 3 3 | 0 0 | 34.17 |
| IPR002847       | 4 | 182 3 3  | 1 1 | 0 0 | 0 0 | 0 0 | 0 0 | 22.93 |
| IPR002872       | 4 | 608 2 1  | 0 0 | 1 0 | 0 0 | 2 2 | 0 0 | 19.91 |
| IPR003142       | 4 | 572 3 1  | 2 0 | 1 0 | 0 0 | 2 1 | 1 0 | 22.23 |
| IPR003203       | 4 | 434 4 4  | 0 0 | 0 0 | 0 0 | 0 0 | 0 0 | 33.13 |
| IPR003351       | 4 | 49 0 0   | 0 0 | 0 0 | 0 0 | 0 0 | 4 4 | 38.98 |
| IPR003380       | 4 | 128 0 0  | 0 0 | 0 0 | 0 0 | 0 0 | 4 4 | 37.11 |
| IPR003451       | 4 | 703 4 4  | 0 0 | 1 1 | 0 0 | 0 0 | 0 0 | 36.71 |
| IPR003457       | 4 | 80 4 4   | 0 0 | 0 0 | 0 0 | 0 0 | 0 0 | 38.19 |
| IPR003474       | 4 | 673 4 4  | 0 0 | 0 0 | 0 0 | 0 0 | 0 0 | 30.14 |
| IPR003508       | 4 | 110 0 0  | 0 0 | 0 0 | 0 0 | 0 0 | 4 4 | 35.14 |
| IPR003577       | 4 | 552 0 0  | 0 0 | 0 0 | 0 0 | 4 4 | 0 0 | 40.9  |
| IPR003590       | 4 | 34 0 0   | 0 0 | 0 0 | 0 0 | 0 0 | 4 4 | 53.86 |
| IPR003603       | 4 | 43 0 0   | 0 0 | 2 2 | 0 0 | 1 0 | 3 2 | 43.18 |
| IPR003612       | 4 | 664 0 0  | 0 0 | 4 4 | 0 0 | 0 0 | 0 0 | 22.78 |
| IPR003647       | 4 | 4 3 3    | 0 0 | 0 0 | 0 0 | 1 1 | 0 0 | 15.24 |
| IPR003675       | 4 | 1906 4 4 | 0 0 | 0 0 | 0 0 | 1 1 | 0 0 | 16.74 |
| IPR003676       | 4 | 533 0 0  | 0 0 | 5 5 | 0 0 | 0 0 | 0 0 | 30.76 |
| IPR003680       | 4 | 1361 2 1 | 0 0 | 2 2 | 0 0 | 0 0 | 0 0 | 11.99 |
| IPR003692       | 4 | 427 4 2  | 2 0 | 2 0 | 2 0 | 2 0 | 2 0 | 27.74 |
| IPR003702       | 4 | 481 3 1  | 2 0 | 0 0 | 0 0 | 1 1 | 0 0 | 17.64 |
| IPR003711       | 4 | 1039 4 1 | 0 0 | 3 0 | 0 0 | 0 0 | 0 0 | 27.7  |
| IPR003715       | 4 | 803 4 4  | 0 0 | 0 0 | 0 0 | 0 0 | 0 0 | 20.85 |
| IPR003741       | 4 | 678 4 2  | 2 0 | 0 0 | 0 0 | 0 0 | 0 0 | 24.86 |
| IPR003780       | 4 | 515 2 1  | 1 0 | 0 0 | 0 0 | 1 1 | 0 0 | 15.21 |
| IPR003787       | 4 | 887 4 3  | 1 0 | 0 0 | 0 0 | 0 0 | 0 0 | 5.8   |
| IPR003788       | 4 | 414 4 4  | 0 0 | 0 0 | 0 0 | 0 0 | 0 0 | 19.52 |
| IPR003797       | 4 | 68       |     |     |     |     |     |       |

|           |   |          |     |     |     |     |     |       |
|-----------|---|----------|-----|-----|-----|-----|-----|-------|
| IPR003823 | 4 | 97 1 1   | 0 0 | 3 3 | 0 0 | 0 0 | 0 0 | 35.85 |
| IPR003830 | 4 | 72 0 0   | 0 0 | 2 2 | 0 0 | 2 2 | 0 0 | 28.64 |
| IPR003869 | 4 | 607 4 4  | 0 0 | 0 0 | 0 0 | 0 0 | 0 0 | 40.04 |
| IPR003870 | 4 | 319 4 4  | 0 0 | 0 0 | 0 0 | 0 0 | 0 0 | 12.04 |
| IPR003954 | 4 | 71 0 0   | 0 0 | 3 0 | 1 0 | 4 1 | 3 0 | 24.65 |
| IPR004125 | 4 | 852 3 0  | 2 0 | 4 1 | 2 0 | 3 0 | 3 0 | 42.65 |
| IPR004127 | 4 | 310 0 0  | 0 0 | 3 3 | 0 0 | 1 1 | 1 1 | 12.21 |
| IPR004149 | 4 | 10 3 3   | 1 1 | 0 0 | 0 0 | 0 0 | 0 0 | 39.86 |
| IPR004201 | 4 | 295 3 0  | 4 0 | 2 0 | 2 0 | 4 0 | 4 0 | 14.75 |
| IPR004256 | 4 | 105 4 2  | 2 0 | 0 0 | 0 0 | 0 0 | 0 0 | 20.11 |
| IPR004282 | 4 | 66 0 0   | 0 0 | 4 4 | 0 0 | 0 0 | 0 0 | 33.13 |
| IPR004304 | 4 | 441 2 2  | 0 0 | 2 2 | 0 0 | 0 0 | 0 0 | 24.06 |
| IPR004326 | 4 | 150 0 0  | 0 0 | 4 4 | 0 0 | 0 0 | 0 0 | 40.26 |
| IPR004370 | 4 | 691 4 4  | 0 0 | 0 0 | 0 0 | 0 0 | 0 0 | 16.79 |
| IPR004401 | 4 | 837 3 3  | 0 0 | 1 1 | 0 0 | 0 0 | 0 0 | 27.48 |
| IPR004463 | 4 | 503 2 2  | 0 0 | 2 2 | 0 0 | 0 0 | 0 0 | 37.51 |
| IPR004664 | 4 | 1044 4 4 | 0 0 | 0 0 | 0 0 | 0 0 | 0 0 | 12.34 |
| IPR004670 | 4 | 418 4 4  | 0 0 | 0 0 | 0 0 | 0 0 | 0 0 | 39.32 |
| IPR004687 | 4 | 59 0 0   | 0 0 | 0 0 | 0 0 | 0 0 | 4 4 | 38.91 |
| IPR004788 | 4 | 662 2 1  | 1 0 | 2 2 | 0 0 | 0 0 | 0 0 | 35.43 |
| IPR004834 | 4 | 98 1 1   | 0 0 | 0 0 | 0 0 | 2 2 | 0 0 | 55.64 |
| IPR004855 | 4 | 100 0 0  | 0 0 | 0 0 | 0 0 | 1 1 | 3 3 | 23.05 |
| IPR004866 | 4 | 73 3 0   | 0 0 | 0 0 | 0 0 | 0 0 | 4 1 | 31.79 |
| IPR004898 | 4 | 60 4 4   | 0 0 | 0 0 | 0 0 | 0 0 | 0 0 | 29.1  |
| IPR004903 | 4 | 22 4 4   | 0 0 | 0 0 | 0 0 | 0 0 | 0 0 | 41.17 |
| IPR004932 | 4 | 117 1 1  | 0 0 | 0 0 | 0 0 | 0 0 | 3 3 | 52.07 |
| IPR005038 | 4 | 128 4 4  | 3 0 | 1 0 | 0 0 | 0 0 | 0 0 | 80.68 |
| IPR005061 | 4 | 161 0 0  | 0 0 | 2 2 | 0 0 | 0 0 | 0 0 | 31.59 |
| IPR005124 | 4 | 137 0 0  | 0 0 | 3 3 | 0 0 | 1 1 | 0 0 | 33.07 |
| IPR005129 | 4 | 315 4 2  | 0 0 | 0 0 | 0 0 | 0 0 | 2 0 | 31.96 |
| IPR005130 | 4 | 696 4 3  | 1 0 | 0 0 | 0 0 | 1 0 | 0 0 | 45.12 |
| IPR005148 | 4 | 894 2 0  | 2 0 | 2 0 | 2 0 | 2 0 | 0 0 | 24.6  |
| IPR005149 | 4 | 1546 3 3 | 1 1 | 0 0 | 0 0 | 0 0 | 0 0 | 20.92 |
| IPR005163 | 4 | 221 4 4  | 0 0 | 0 0 | 0 0 | 0 0 | 0 0 | 18.06 |
| IPR005178 | 4 | 195 0 0  | 0 0 | 2 2 | 0 0 | 1 1 | 2 2 | 24    |
| IPR005180 | 4 | 261 4 4  | 0 0 | 0 0 | 0 0 | 0 0 | 0 0 | 17.34 |
| IPR005197 | 4 | 116 0 0  | 0 0 | 0 0 | 0 0 | 4 4 | 0 0 | 26.71 |
| IPR005341 | 4 | 96 0 0   | 0 0 | 4 4 | 0 0 | 0 0 | 0 0 | 39.17 |
| IPR005343 | 4 | 94 0 0   | 0 0 | 4 4 | 0 0 | 0 0 | 0 0 | 32.27 |
| IPR005344 | 4 | 78 0 0   | 0 0 | 3 3 | 0 0 | 0 0 | 1 1 | 21.25 |
| IPR005349 | 4 | 144 0 0  | 0 0 | 3 3 | 0 0 | 0 0 | 1 1 | 22.41 |
| IPR005484 | 4 | 985 0 0  | 0 0 | 1 1 | 0 0 | 0 0 | 2 2 | 35.4  |
| IPR005496 | 4 | 1204 4 4 | 0 0 | 0 0 | 0 0 | 0 0 | 0 0 | 24.8  |
| IPR005522 | 4 | 235 1 1  | 0 0 | 0 0 | 1 1 | 0 0 | 0 0 | 20.87 |
| IPR005548 | 4 | 548 4 4  | 0 0 | 0 0 | 0 0 | 0 0 | 0 0 | 8.67  |
| IPR005559 | 4 | 78 0 0   | 0 0 | 4 1 | 0 0 | 0 0 | 4 1 | 50.87 |
| IPR005592 | 4 | 67 0 0   | 0 0 | 4 3 | 0 0 | 1 0 | 0 0 | 20.7  |
| IPR005607 | 4 | 305 0 0  | 0 0 | 4 4 | 0 0 | 1 0 | 1 0 | 15.13 |
| IPR005822 | 4 | 1015 0 0 | 1 1 | 1 1 | 0 0 | 1 1 | 0 0 | 44.3  |
| IPR005849 | 4 | 421 3 0  | 0 0 | 3 0 | 0 0 | 1 0 | 0 0 | 22.61 |
| IPR006043 | 4 | 2216 1 1 | 0 0 | 0 0 | 0 0 | 0 0 | 3 3 | 19.62 |
| IPR006127 | 4 | 1174 3 3 | 1 1 | 0 0 | 0 0 | 0 0 | 0 0 | 17.24 |
| IPR006148 | 4 | 645 3 3  | 0 0 | 1 0 | 0 0 | 0 0 | 1 0 | 25.25 |
| IPR006182 | 4 | 590 3 2  | 0 0 | 2 1 | 0 0 | 0 0 | 0 0 | 23.62 |
| IPR006218 | 4 | 1585 4 4 | 0 0 | 0 0 | 0 0 | 0 0 | 0 0 | 27.41 |
| IPR006314 | 4 | 472 4 3  | 1 0 | 0 0 | 1 1 | 0 0 | 0 0 | 17.98 |
| IPR006457 | 4 | 42 2 2   | 2 2 | 0 0 | 0 0 | 0 0 | 0 0 | 25.55 |
| IPR006460 | 4 | 89 0 0   | 0 0 | 4 4 | 0 0 | 0 0 | 0 0 | 49.57 |
| IPR006528 | 4 | 210 4 4  | 0 0 | 0 0 | 0 0 | 0 0 | 0 0 | 12.82 |
| IPR006538 | 4 | 129 2 2  | 0 0 | 0 0 | 0 0 | 2 2 | 0 0 | 29.34 |
| IPR006554 | 4 | 161 0 0  | 0 0 | 2 0 | 1 0 | 2 0 | 3 1 | 27.89 |
| IPR006563 | 4 | 115 0 0  | 0 0 | 5 5 | 0 0 | 0 0 | 0 0 | 34.36 |
| IPR006565 | 4 | 178 0 0  | 0 0 | 1 0 | 0 0 | 3 2 | 2 1 | 15.05 |
| IPR006568 | 4 | 105 0 0  | 0 0 | 2 0 | 1 0 | 2 1 | 3 1 | 48.53 |
| IPR006577 | 4 | 143 0 0  | 0 0 | 1 0 | 1 0 | 0 0 | 4 3 | 22.1  |
| IPR006587 | 4 | 65 0 0   | 0 0 | 0 0 | 0 0 | 0 0 | 4 4 | 43.19 |
| IPR006588 | 4 | 60 0 0   | 0 0 | 0 0 | 0 0 | 0 0 | 4 4 | 26.21 |
| IPR006616 | 4 | 245 0 0  | 0 0 | 0 0 | 0 0 | 0 0 | 4 4 | 37.45 |
| IPR006619 | 4 | 241 3 3  | 0 0 | 0 0 | 0 0 | 0 0 | 1 1 | 30.15 |
| IPR006624 | 4 | 273 0 0  | 0 0 | 0 0 | 0 0 | 1 1 | 3 3 | 23.56 |
| IPR006660 | 4 | 1142 4 4 | 0 0 | 0 0 | 0 0 | 0 0 | 0 0 | 20.69 |
| IPR006693 | 4 | 481 1 0  | 0 0 | 2 0 | 1 0 | 3 1 | 3 1 | 33.56 |
| IPR006730 | 4 | 46 0 0   | 0 0 | 0 0 | 0 0 | 0 0 | 4 4 | 52.14 |
| IPR006747 | 4 | 146 0 0  | 0 0 | 3 3 | 0 0 | 0 0 | 1 1 | 21.03 |
| IPR006767 | 4 | 131 0 0  | 0 0 | 3 2 | 1 0 | 2 0 | 2 0 | 23.11 |
| IPR006794 | 4 | 25 0 0   | 0 0 | 0 0 | 0 0 | 0 0 | 4 4 | 62.43 |
| IPR006797 | 4 | 179 0 0  | 0 0 | 0 0 | 0 0 | 1 1 | 3 3 | 24.1  |
| IPR006806 | 4 | 68 0 0   | 0 0 | 0 0 | 0 0 | 4 4 | 0 0 | 39.12 |
| IPR006842 | 4 | 535 4 3  | 1 0 | 0 0 | 0 0 | 0 0 | 0 0 | 13.71 |
| IPR006852 | 4 | 90 3 1   | 2 0 | 1 1 | 0 0 | 0 0 | 0 0 | 36.13 |
| IPR006867 | 4 | 164 0 0  | 0 0 | 4 3 | 0 0 | 0 0 | 1 0 | 27.64 |
| IPR006899 | 4 | 37 0 0   | 0 0 | 0 0 | 0 0 | 0 0 | 4 4 | 52.71 |
| IPR006907 | 4 | 84 0 0   | 0 0 | 0 0 | 0 0 | 0 0 | 4 4 | 54.43 |
| IPR006911 | 4 | 64 0 0   | 0 0 | 0 0 | 0 0 | 0 0 | 2 2 | 23.76 |
| IPR006941 | 4 | 278 0 0  | 0 0 | 3 3 | 0 0 | 2 2 | 0 0 | 24.01 |
| IPR006944 | 4 | 442 4 4  | 0 0 | 0 0 | 0 0 | 0 0 | 0 0 | 10.15 |
| IPR006982 | 4 | 650 3 0  | 3 0 | 4 0 | 4 0 | 4 0 | 4 0 | 40.57 |
| IPR006989 | 4 | 42 0 0   | 0 0 | 0 0 | 0 0 | 0 0 | 4 4 | 43.26 |
| IPR007010 | 4 | 158 0 0  | 0 0 | 2 1 | 1 0 | 3 2 | 1 0 | 26.1  |
| IPR007051 | 4 | 141 0 0  | 0 0 | 1 1 | 0 0 | 3 2 | 1 0 | 49.95 |
| IPR007130 | 4 | 227 0 0  | 0 0 | 1 3 | 0 0 | 1 1 | 0 0 | 21.21 |
| IPR007131 | 4 | 33 1 1   | 0 0 | 0 0 | 0 0 | 3 3 | 0 0 | 59.07 |
| IPR007148 | 4 | 155 0 0  | 0 0 | 3 1 | 2 0 | 2 0 | 2 0 | 12.52 |
| IPR007168 | 4 | 496 4 4  | 0 0 | 0 0 | 0 0 | 0 0 | 0 0 | 30.14 |
| IPR007205 | 4 | 73 0 0   | 0 0 | 1 0 | 0 0 | 4 3 | 1 0 | 30.22 |
| IPR007231 | 4 | 100 0 0  | 0 0 | 1 1 | 0 0 | 1 1 | 0 0 | 21.54 |
| IPR007243 | 4 | 105 0 0  | 0 0 | 2 2 | 0 0 | 1 1 | 0 0 | 35.25 |
| IPR007248 | 4 | 434 0 0  | 0 0 | 0 0 | 0 0 | 2 2 | 0 0 | 19.17 |
| IPR007255 | 4 | 83 0 0   | 0 0 | 1 1 | 0 0 | 3 3 | 0 0 | 26.81 |
| IPR007287 | 4 | 78 0 0   | 0 0 | 2 0 | 2 0 | 2 0 | 4 2 | 40.91 |
| IPR007302 | 4 | 396 4 3  | 1 0 | 0 0 | 0 0 | 0 0 | 0 0 | 35.51 |
| IPR007319 | 4 | 77 0 0   | 0 0 | 2 0 | 2 0 | 2 0 | 0 0 | 25.56 |
| IPR007354 | 4 | 76 4 4   | 0 0 | 0 0 | 0 0 | 0 0 | 0 0 | 18.78 |
| IPR007396 | 4 | 224 0 0  | 0 0 | 0 0 | 0 0 | 4 4 | 0 0 | 29.29 |
| IPR007400 | 4 | 239 1 1  | 0 0 | 0 0 | 0 0 | 3 3 | 0 0 | 39.48 |
| IPR007507 | 4 | 452 5 5  | 0 0 | 0 0 | 0 0 | 0 0 | 0 0 | 26.52 |
| IPR007541 | 4 | 74 4 4   | 0 0 | 0 0 | 0 0 | 0 0 | 0 0 | 27.11 |
| IPR007545 | 4 | 46 1 1   | 0 0 | 0 0 | 0 0 | 0 0 | 0 0 | 34.07 |
| IPR007553 | 4 | 389 3 2  | 2 1 | 0 0 | 0 0 | 0 0 | 0 0 | 25.62 |
| IPR007581 | 4 | 238 0 0  | 1 1 | 1 1 | 0 0 | 0 0 | 1 1 | 34.99 |
| IPR007582 | 4 | 116 0 0  | 0 0 | 2 0 | 1 0 | 4 1 | 4 1 | 17.92 |
| IPR007590 | 4 | 149 0 0  | 0 0 | 1 1 | 0 0 | 0 0 | 1 1 | 25.68 |
| IPR007599 | 4 | 193 0 0  | 0 0 | 1 1 | 0 0 | 3 3 | 0 0 | 22    |
| IPR007655 | 4 | 76 4 4   | 0 0 | 0 0 | 0 0 | 0 0 | 0 0 | 15.9  |
| IPR007699 | 4 | 130 0 0  | 0 0 | 4 1 | 2 0 | 2 0 | 3 0 | 38.61 |
| IPR007705 | 4 | 287 0 0  | 0 0 | 1 0 | 1 0 | 1 0 | 4 3 | 10.74 |
| IPR007716 | 4 | 63 0 0   | 0 0 | 0 0 | 2 0 | 4 1 | 3 0 | 54.52 |
| IPR007722 | 4 | 80 0 0   | 0 0 | 1 0 | 1 0 | 4 3 | 1 0 | 41.95 |
| IPR007781 | 4 | 72 3 3   | 0 0 | 1 1 | 0 0 | 0 0 | 0 0 | 35.1  |
| IPR007812 | 4 | 206 2 2  | 0 0 | 2 2 | 0 0 | 0 0 | 0 0 | 7.86  |
| IPR007815 | 4 | 146 3 3  | 0 0 | 1 1 | 0 0 | 0 0 | 0 0 | 20.98 |
| IPR007861 | 4 | 8 2 0    | 0 0 | 4 0 | 0 0 | 4 0 | 0 0 | 19.34 |
| IPR007899 | 4 | 293 2 1  | 3 2 | 0 0 | 0 0 | 0 0 | 0 0 | 9.79  |
| IPR007941 | 4 | 89 1 1   | 0 0 | 0 0 | 0 0 | 3 3 | 0 0 | 37.43 |
| IPR007956 | 4 | 101 0 0  | 0 0 | 4 4 | 0 0 | 0 0 | 0 0 | 39.2  |
| IPR008040 | 4 | 578 3 1  | 2 0 | 2 0 | 2 0 | 2 0 | 2 0 | 23.26 |
| IPR008138 | 4 | 6 0 0    | 0 0 | 1 1 | 0 0 | 0 0 | 3 3 | 21.81 |
| IPR008146 | 4 | 1848 3 1 | 1 0 | 3 0 | 1 0 | 2 0 | 1 0 | 24.19 |
| IPR008162 | 4 | 819 1 1  | 0 0 | 0 0 | 0 0 | 0 0 | 1 1 | 32.47 |
| IPR008209 | 4 | 271 0 0  | 0 0 | 4 4 | 0 0 | 0 0 | 0 0 | 51.79 |
| IPR008282 | 4 | 784 3 2  | 0 0 | 0 0 | 0 0 | 0 0 | 0 0 | 47.91 |
| IPR008322 | 4 | 107 1 1  | 0 0 | 3 3 | 0 0 | 1 1 | 0 0 | 38.68 |
| IPR008428 | 4 | 112 0 0  | 0 0 | 0 0 | 0 0 | 0 0 | 4 4 | 17.99 |
| IPR008471 | 4 | 336 4 4  | 0 0 | 0 0 | 0 0 | 0 0 | 0 0 | 25.21 |
| IPR008512 | 4 | 40 0 0   | 0 0 | 4 4 | 0 0 | 0 0 | 0 0 | 44.41 |
| IPR008676 | 4 | 154 0 0  | 0 0 | 3 2 | 0 0 | 2 0 | 2 0 | 28.02 |
| IPR008762 | 4 | 36 4 4   | 0 0 | 0 0 | 0 0 | 0 0 | 0 0 | 34.49 |
| IPR008823 | 4 | 760 4 2  | 2 0 | 1 0 | 0 0 | 0 0 | 0 0 | 53.93 |
| IPR008854 | 4 | 252 3 3  | 0 0 | 0 0 | 0 0 | 1 1 | 0 0 | 18.36 |
| IPR008881 | 4 | 780 4 2  | 0 0 | 2 0 | 0 0 | 0 0 | 0 0 | 22.27 |
| IPR008884 | 4 | 93 4 4   | 0 0 | 0 0 | 0 0 | 0 0 | 0 0 | 22.03 |
| IPR009093 | 4 | 13 4 4   | 0 0 | 0 0 | 0 0 | 0 0 | 0 0 | 70.66 |
| IPR009286 | 4 | 83 0 0   | 0 0 | 1 1 | 0 0 | 0 0 | 0 0 | 16.88 |
| IPR009292 | 4 | 76 2 2   | 0 0 | 0 0 | 0 0 | 0 0 | 2 2 | 29.99 |
| IPR009316 | 4 | 80 0 0   | 0 0 | 1 0 | 1 0 | 2 1 | 3 2 | 26.31 |
| IPR009408 | 4 | 13 0 0   | 0 0 |     |     |     |     |       |

|           |   |          |     |     |     |     |     |       |
|-----------|---|----------|-----|-----|-----|-----|-----|-------|
| IPR009612 | 4 | 268 4 4  | 0 0 | 0 0 | 0 0 | 0 0 | 0 0 | 13.88 |
| IPR009675 | 4 | 130 0 0  | 0 0 | 2 1 | 0 0 | 0 0 | 2 1 | 37.44 |
| IPR009695 | 4 | 167 4 3  | 0 0 | 1 0 | 0 0 | 0 0 | 0 0 | 14.92 |
| IPR009698 | 4 | 154 5 5  | 0 0 | 0 0 | 0 0 | 0 0 | 0 0 | 31.01 |
| IPR009784 | 4 | 143 4 4  | 0 0 | 0 0 | 0 0 | 0 0 | 0 0 | 20.43 |
| IPR009967 | 4 | 89 0 0   | 0 0 | 4 4 | 0 0 | 0 0 | 0 0 | 28.81 |
| IPR010011 | 4 | 40 0 0   | 0 0 | 0 0 | 0 0 | 0 0 | 4 4 | 43.87 |
| IPR010056 | 4 | 58 4 4   | 0 0 | 0 0 | 0 0 | 0 0 | 0 0 | 33.57 |
| IPR010281 | 4 | 340 3 3  | 0 0 | 0 0 | 0 0 | 2 2 | 0 0 | 17.44 |
| IPR010298 | 4 | 206 3 3  | 0 0 | 1 1 | 0 0 | 0 0 | 0 0 | 20.99 |
| IPR010325 | 4 | 65 0 0   | 0 0 | 4 4 | 0 0 | 0 0 | 0 0 | 44.41 |
| IPR010327 | 4 | 312 4 2  | 2 0 | 0 0 | 0 0 | 0 0 | 0 0 | 14.56 |
| IPR010363 | 4 | 3 0 0    | 0 0 | 0 0 | 0 0 | 0 0 | 4 4 | 44.05 |
| IPR010419 | 4 | 230 4 4  | 0 0 | 0 0 | 0 0 | 0 0 | 0 0 | 22.62 |
| IPR010425 | 4 | 155 4 4  | 0 0 | 0 0 | 0 0 | 0 0 | 0 0 | 23.05 |
| IPR010433 | 4 | 44 0 0   | 0 0 | 2 2 | 0 0 | 0 0 | 1 1 | 30.29 |
| IPR010445 | 4 | 463 4 4  | 0 0 | 0 0 | 0 0 | 0 0 | 0 0 | 15.61 |
| IPR010465 | 4 | 41 0 0   | 0 0 | 0 0 | 0 0 | 0 0 | 4 4 | 91.66 |
| IPR010508 | 4 | 35 0 0   | 0 0 | 0 0 | 0 0 | 0 0 | 4 4 | 63.85 |
| IPR010526 | 4 | 87 0 0   | 0 0 | 0 0 | 0 0 | 0 0 | 4 4 | 27.52 |
| IPR010578 | 4 | 8 0 0    | 0 0 | 0 0 | 0 0 | 0 0 | 4 4 | 35.39 |
| IPR010582 | 4 | 794 3 1  | 2 0 | 1 0 | 0 0 | 2 0 | 1 0 | 17.45 |
| IPR010596 | 4 | 122 0 0  | 0 0 | 0 0 | 0 0 | 0 0 | 5 5 | 30.26 |
| IPR010599 | 4 | 14 0 0   | 0 0 | 0 0 | 0 0 | 0 0 | 4 4 | 67.09 |
| IPR010603 | 4 | 760 4 4  | 0 0 | 0 0 | 0 0 | 0 0 | 0 0 | 49.98 |
| IPR010643 | 4 | 79 0 0   | 0 0 | 2 0 | 2 0 | 3 0 | 3 0 | 53.47 |
| IPR010656 | 4 | 1249 3 3 | 0 0 | 0 0 | 0 0 | 0 0 | 1 1 | 23.36 |
| IPR010662 | 4 | 337 3 3  | 0 0 | 0 0 | 0 0 | 0 0 | 0 0 | 19.5  |
| IPR010664 | 4 | 448 2 2  | 0 0 | 0 0 | 0 0 | 0 0 | 0 0 | 5.04  |
| IPR010699 | 4 | 411 2 2  | 0 0 | 1 1 | 0 0 | 0 0 | 0 0 | 11.37 |
| IPR010713 | 4 | 250 0 0  | 0 0 | 4 4 | 0 0 | 0 0 | 0 0 | 29.03 |
| IPR010721 | 4 | 224 2 2  | 0 0 | 1 1 | 0 0 | 2 2 | 0 0 | 16.11 |
| IPR010744 | 4 | 108 4 4  | 0 0 | 0 0 | 0 0 | 0 0 | 4 4 | 23.22 |
| IPR010775 | 4 | 196 2 2  | 0 0 | 0 0 | 0 0 | 2 2 | 0 0 | 24.94 |
| IPR010802 | 4 | 113 4 4  | 0 0 | 0 0 | 0 0 | 0 0 | 0 0 | 20.25 |
| IPR010820 | 4 | 37 0 0   | 0 0 | 1 1 | 0 0 | 3 3 | 0 0 | 20.44 |
| IPR010905 | 4 | 336 4 3  | 1 0 | 0 0 | 0 0 | 0 0 | 0 0 | 10.87 |
| IPR010935 | 4 | 23 1 1   | 0 0 | 0 2 | 1 0 | 0 0 | 1 0 | 13.61 |
| IPR011022 | 4 | 550 0 0  | 0 0 | 0 0 | 0 0 | 0 0 | 4 3 | 11.47 |
| IPR011259 | 4 | 97 1 1   | 0 0 | 0 0 | 0 0 | 0 0 | 3 3 | 31.27 |
| IPR011263 | 4 | 993 1 0  | 0 0 | 2 1 | 0 0 | 0 0 | 1 1 | 30.52 |
| IPR011427 | 4 | 58 4 4   | 0 0 | 0 0 | 0 0 | 0 0 | 0 0 | 21.01 |
| IPR011439 | 4 | 655 4 4  | 0 0 | 0 0 | 0 0 | 0 0 | 0 0 | 19.3  |
| IPR011467 | 4 | 71 4 4   | 0 0 | 0 0 | 0 0 | 0 0 | 0 0 | 36.76 |
| IPR011483 | 4 | 37 4 4   | 0 0 | 0 0 | 0 0 | 0 0 | 0 0 | 39.48 |
| IPR011494 | 4 | 72 0 0   | 0 0 | 2 0 | 0 0 | 4 1 | 3 0 | 22.79 |
| IPR011509 | 4 | 192 4 4  | 0 0 | 0 0 | 0 0 | 0 0 | 0 0 | 34.76 |
| IPR011615 | 4 | 88 0 0   | 0 0 | 0 0 | 0 0 | 0 0 | 4 4 | 46.79 |
| IPR011628 | 4 | 23 6 6   | 0 0 | 0 0 | 0 0 | 0 0 | 0 0 | 43.65 |
| IPR011649 | 4 | 148 3 1  | 0 0 | 3 1 | 0 0 | 0 0 | 0 0 | 39.94 |
| IPR011650 | 4 | 67 1 0   | 0 0 | 0 0 | 0 0 | 1 1 | 2 1 | 25.83 |
| IPR011665 | 4 | 75 0 0   | 0 0 | 2 0 | 3 0 | 4 1 | 3 0 | 38.38 |
| IPR011679 | 4 | 76 0 0   | 0 0 | 2 0 | 1 0 | 3 2 | 2 0 | 28.17 |
| IPR011697 | 4 | 573 5 5  | 0 0 | 0 0 | 0 0 | 0 0 | 0 0 | 26.04 |
| IPR011722 | 4 | 191 0 0  | 0 0 | 2 2 | 0 0 | 1 1 | 1 1 | 34.01 |
| IPR012327 | 4 | 597 4 3  | 1 0 | 0 0 | 0 0 | 0 0 | 0 0 | 17.65 |
| IPR012460 | 4 | 70 1 1   | 0 0 | 0 0 | 0 0 | 0 0 | 0 0 | 41.23 |
| IPR012474 | 4 | 115 0 0  | 0 0 | 4 4 | 0 0 | 0 0 | 0 0 | 22.37 |
| IPR012500 | 4 | 17 4 4   | 0 0 | 0 0 | 0 0 | 0 0 | 0 0 | 40.04 |
| IPR012501 | 4 | 74 0 0   | 0 0 | 4 3 | 0 0 | 1 0 | 1 0 | 37.22 |
| IPR012532 | 4 | 8 0 0    | 0 0 | 0 0 | 0 0 | 0 0 | 4 4 | 76.82 |
| IPR012562 | 4 | 51 2 0   | 0 0 | 4 2 | 2 0 | 0 0 | 2 0 | 25.85 |
| IPR012796 | 4 | 185 4 4  | 0 0 | 0 0 | 0 0 | 0 0 | 0 0 | 25.4  |
| IPR012859 | 4 | 106 0 0  | 4 4 | 0 0 | 0 0 | 0 0 | 0 0 | 21.45 |
| IPR012904 | 4 | 148 1 0  | 1 0 | 3 2 | 1 0 | 2 1 | 2 1 | 16.6  |
| IPR012914 | 4 | 213 4 4  | 0 0 | 0 0 | 0 0 | 0 0 | 0 0 | 19.42 |
| IPR012943 | 4 | 84 0 0   | 0 0 | 0 0 | 0 0 | 1 1 | 2 2 | 38.8  |
| IPR012952 | 4 | 84 2 2   | 0 0 | 1 0 | 1 0 | 2 0 | 2 0 | 55.01 |
| IPR012969 | 4 | 6 2 2    | 0 0 | 0 0 | 2 2 | 0 0 | 0 0 | 4.21  |
| IPR012972 | 4 | 151 0 0  | 0 0 | 2 0 | 3 1 | 2 0 | 3 1 | 24.05 |
| IPR012975 | 4 | 67 0 0   | 0 0 | 0 0 | 0 0 | 0 0 | 4 4 | 57.51 |
| IPR012978 | 4 | 78 0 0   | 0 0 | 2 2 | 1 1 | 0 0 | 0 0 | 27.46 |
| IPR012993 | 4 | 55 0 0   | 0 0 | 3 0 | 3 0 | 4 1 | 0 0 | 23.38 |
| IPR013150 | 4 | 136 0 0  | 3 1 | 3 0 | 3 0 | 4 1 | 3 0 | 14.69 |
| IPR013159 | 4 | 833 4 4  | 0 0 | 0 0 | 0 0 | 0 0 | 0 0 | 37.89 |
| IPR013185 | 4 | 933 2 0  | 1 0 | 3 1 | 2 0 | 0 0 | 0 0 | 31.86 |
| IPR013187 | 4 | 213 0 0  | 0 0 | 5 5 | 0 0 | 0 0 | 0 0 | 19.9  |
| IPR013194 | 4 | 113 0 0  | 0 0 | 2 1 | 0 0 | 2 1 | 1 0 | 39.88 |
| IPR013228 | 4 | 163 4 4  | 0 0 | 0 0 | 0 0 | 0 0 | 0 0 | 23.57 |
| IPR013236 | 4 | 58 4 4   | 0 0 | 0 0 | 0 0 | 0 0 | 0 0 | 16.87 |
| IPR013244 | 4 | 53 0 0   | 0 0 | 3 3 | 0 0 | 0 0 | 1 1 | 19.56 |
| IPR013513 | 4 | 101 0 0  | 0 0 | 0 0 | 0 0 | 0 0 | 4 4 | 47.59 |
| IPR013528 | 4 | 256 1 0  | 2 1 | 3 2 | 0 0 | 1 0 | 1 0 | 29.3  |
| IPR013543 | 4 | 239 1 1  | 0 0 | 1 1 | 0 0 | 0 0 | 2 2 | 10.81 |
| IPR013544 | 4 | 24 0 0   | 0 0 | 0 0 | 0 0 | 0 0 | 4 4 | 74.35 |
| IPR013548 | 4 | 96 0 0   | 0 0 | 0 0 | 0 0 | 0 0 | 4 4 | 55.24 |
| IPR013556 | 4 | 453 3 2  | 0 0 | 2 1 | 0 0 | 0 0 | 0 0 | 24.38 |
| IPR013564 | 4 | 184 4 3  | 1 0 | 0 0 | 0 0 | 0 0 | 0 0 | 33.74 |
| IPR013583 | 4 | 140 0 0  | 0 0 | 4 3 | 0 0 | 0 0 | 2 1 | 47.54 |
| IPR013584 | 4 | 143 1 1  | 0 0 | 2 2 | 0 0 | 0 0 | 2 2 | 18.01 |
| IPR013595 | 4 | 247 4 3  | 0 0 | 0 0 | 0 0 | 0 0 | 0 0 | 13.64 |
| IPR013608 | 4 | 80 0 0   | 0 0 | 0 0 | 0 0 | 0 0 | 4 4 | 31.13 |
| IPR013611 | 4 | 2844 4 3 | 1 0 | 1 0 | 0 0 | 0 0 | 0 0 | 14.49 |
| IPR013646 | 4 | 80 0 0   | 2 1 | 0 0 | 3 2 | 1 0 | 0 0 | 36.69 |
| IPR013649 | 4 | 172 0 0  | 0 0 | 0 0 | 0 0 | 0 0 | 4 4 | 13.91 |
| IPR013650 | 4 | 994 3 1  | 0 0 | 1 0 | 2 0 | 3 0 | 0 0 | 28.81 |
| IPR013663 | 4 | 130 4 4  | 0 0 | 0 0 | 0 0 | 0 0 | 0 0 | 12.09 |
| IPR013670 | 4 | 94 4 2   | 2 0 | 0 0 | 0 0 | 0 0 | 0 0 | 31.42 |
| IPR013686 | 4 | 413 4 4  | 0 0 | 0 0 | 0 0 | 0 0 | 0 0 | 18.03 |
| IPR013689 | 4 | 266 4 1  | 0 0 | 3 0 | 0 0 | 0 0 | 0 0 | 45.29 |
| IPR013697 | 4 | 75 0 0   | 0 0 | 2 0 | 2 0 | 2 0 | 4 2 | 34.84 |
| IPR013710 | 4 | 119 4 4  | 0 0 | 0 0 | 0 0 | 0 0 | 0 0 | 44.73 |
| IPR013721 | 4 | 112 0 0  | 0 0 | 3 2 | 1 0 | 1 0 | 2 1 | 32.97 |
| IPR013725 | 4 | 75 0 0   | 1 0 | 2 0 | 3 1 | 3 1 | 2 0 | 36.03 |
| IPR013727 | 4 | 277 4 4  | 0 0 | 0 0 | 0 0 | 0 0 | 0 0 | 18.35 |
| IPR013737 | 4 | 139 4 3  | 1 0 | 0 0 | 0 0 | 1 0 | 0 0 | 23.78 |
| IPR013739 | 4 | 118 4 2  | 0 0 | 0 0 | 0 0 | 2 0 | 0 0 | 19.42 |
| IPR013765 | 4 | 77 4 4   | 0 0 | 0 0 | 0 0 | 2 2 | 0 0 | 22.25 |
| IPR013768 | 4 | 51 0 0   | 0 0 | 0 0 | 0 0 | 0 0 | 5 5 | 34.19 |
| IPR013818 | 4 | 631 2 1  | 0 0 | 0 0 | 0 0 | 0 0 | 3 2 | 23.57 |
| IPR013823 | 4 | 907 2 1  | 0 0 | 1 1 | 1 0 | 0 0 | 1 1 | 52.57 |
| IPR013905 | 4 | 52 0 0   | 0 0 | 1 0 | 0 0 | 1 0 | 4 3 | 18.9  |
| IPR013939 | 4 | 31 0 0   | 0 0 | 0 0 | 0 0 | 4 4 | 0 0 | 39.84 |
| IPR013990 | 4 | 139 3 3  | 1 1 | 0 0 | 0 0 | 0 0 | 0 0 | 18.29 |
| IPR014038 | 4 | 199 0 0  | 0 0 | 1 0 | 0 0 | 2 0 | 3 2 | 44.31 |
| IPR014039 | 4 | 836 2 1  | 0 0 | 3 2 | 1 0 | 1 0 | 1 0 | 36.29 |
| IPR014543 | 4 | 80 4 4   | 0 0 | 0 0 | 0 0 | 0 0 | 0 0 | 30.57 |
| IPR014772 | 4 | 5 0 0    | 0 0 | 1 1 | 0 0 | 0 0 | 3 3 | 12.19 |
| IPR014893 | 4 | 69 0 0   | 0 0 | 3 0 | 1 0 | 2 0 | 4 1 | 22.26 |
| IPR014906 | 4 | 91 0 0   | 0 0 | 4 1 | 3 0 | 4 1 | 3 0 | 46.2  |
| IPR014920 | 4 | 32 0 0   | 0 0 | 0 0 | 0 0 | 0 0 | 4 4 | 63.32 |
| IPR014927 | 4 | 34 4 3   | 1 0 | 0 0 | 0 0 | 0 0 | 0 0 | 24.66 |
| IPR014929 | 4 | 71 0 0   | 0 0 | 3 0 | 1 0 | 3 0 | 4 1 | 35.72 |
| IPR014935 | 4 | 32 0 0   | 0 0 | 0 0 | 0 0 | 0 0 | 4 4 | 56.55 |
| IPR014939 | 4 | 58 0 0   | 0 0 | 1 1 | 0 0 | 3 3 | 1 1 | 25.7  |
| IPR014940 | 4 | 133 3 2  | 0 0 | 1 0 | 0 0 | 1 0 | 0 0 | 9.89  |
| IPR014973 | 4 | 79 4 4   | 0 0 | 0 0 | 0 0 | 0 0 | 0 0 | 21.02 |
| IPR015016 | 4 | 64 0 0   | 0 0 | 3 1 | 0 0 | 3 1 | 1 0 | 46.09 |
| IPR015030 | 4 | 17 0 0   | 0 0 | 0 0 | 0 0 | 0 0 | 4 4 | 62.14 |
| IPR015032 | 4 | 127 4 4  | 0 0 | 0 0 | 0 0 | 0 0 | 0 0 | 10.96 |
| IPR015033 | 4 | 40 0 0   | 0 0 | 0 0 | 0 0 | 0 0 | 4 4 | 36.44 |
| IPR015088 | 4 | 65 0 0   | 0 0 | 0 0 | 0 0 | 3 0 | 4 1 | 28.04 |
| IPR015127 | 4 | 6 0 0    | 0 0 | 0 0 | 0 0 | 0 0 | 4 4 | 89.74 |
| IPR015155 | 4 | 80 0 0   | 0 0 | 3 0 | 3 0 | 3 0 | 3 0 | 41.33 |
| IPR015187 | 4 | 37 0 0   | 0 0 | 2 0 | 0 0 | 1 0 | 4 2 | 33.75 |
| IPR015188 | 4 | 15 0 0   | 0 0 | 0 0 | 0 0 | 0 0 | 4 4 | 42.87 |
| IPR015194 | 4 | 84 0 0   | 0 0 | 4 0 | 0 0 | 4 0 | 0 0 | 45.56 |
| IPR015205 | 4 | 11 0 0   | 0 0 | 0 0 | 0 0 | 0 0 | 4 4 | 66.32 |
| IPR015212 | 4 | 35 0 0   | 0 0 | 0 0 | 0 0 | 0 0 | 4 4 | 39.75 |
| IPR015220 | 4 | 54 4 3   | 1 0 | 0 0 | 0 0 | 0 0 | 0 0 | 31.15 |
| IPR015223 | 4 | 130 3 1  | 1 0 | 3 1 | 1 0 | 1 0 | 1 0 | 44.15 |
| IPR015252 | 4 | 30 0 0   | 0 0 | 2 0 | 0 0 | 1 0 | 4 2 | 35.24 |
| IPR015274 | 4 | 15 0 0   | 0 0 | 0 0 | 0 0 | 0 0 | 4 4 | 66.14 |
| IPR015280 | 4 | 8 0 0    | 0 0 | 0 0 | 0 0 | 4 4 | 0 0 | 31.18 |
| IPR015324 | 4 | 130 0 0  | 0 0 | 0 0 | 0 0 | 2 2 | 1 1 | 21.59 |
| IPR015340 | 4 | 67 0 0   | 0 0 | 0 0 | 0 0 | 4 3 | 1   |       |

|           |   |          |     |     |     |     |     |       |
|-----------|---|----------|-----|-----|-----|-----|-----|-------|
| IPRO15370 | 4 | 31 0 0   | 0 0 | 0 0 | 0 0 | 0 0 | 4 4 | 70.74 |
| IPRO15375 | 4 | 323 2 0  | 2 0 | 3 1 | 0 0 | 2 0 | 3 1 | 6.6   |
| IPRO15386 | 4 | 24 1 1   | 0 0 | 0 0 | 0 0 | 0 0 | 3 3 | 40.34 |
| IPRO15391 | 4 | 650 4 3  | 0 0 | 1 0 | 0 0 | 0 0 | 0 0 | 17.68 |
| IPRO15392 | 4 | 146 4 4  | 0 0 | 0 0 | 0 0 | 0 0 | 0 0 | 38.41 |
| IPRO15399 | 4 | 106 0 0  | 0 0 | 1 0 | 2 1 | 3 2 | 1 0 | 28    |
| IPRO15405 | 4 | 170 3 0  | 0 0 | 4 1 | 0 0 | 3 0 | 0 0 | 28.17 |
| IPRO15412 | 4 | 109 0 0  | 0 0 | 1 1 | 0 0 | 2 1 | 2 1 | 22.3  |
| IPRO15864 | 4 | 763 3 3  | 0 0 | 0 0 | 0 0 | 1 1 | 0 0 | 28.01 |
| IPRO15868 | 4 | 408 3 2  | 0 0 | 0 0 | 0 0 | 0 0 | 2 1 | 37.55 |
| IPRO15871 | 4 | 86 0 0   | 0 0 | 1 0 | 0 0 | 2 1 | 3 2 | 59.58 |
| IPRO15872 | 4 | 87 0 0   | 0 0 | 1 0 | 0 0 | 2 1 | 3 2 | 58.05 |
| IPRO15894 | 4 | 168 0 0  | 0 0 | 1 0 | 0 0 | 0 0 | 4 3 | 30.25 |
| IPRO15898 | 4 | 240 0 0  | 0 0 | 0 0 | 0 0 | 0 0 | 4 4 | 25.86 |
| IPRO15945 | 4 | 996 2 0  | 2 0 | 2 0 | 2 0 | 1 0 | 2 0 | 23.64 |
| IPRO16033 | 4 | 28 0 0   | 4 4 | 0 0 | 0 0 | 0 0 | 0 0 | 48.85 |
| IPRO16053 | 4 | 279 1 1  | 0 0 | 0 0 | 0 0 | 0 0 | 0 0 | 14.58 |
| IPRO17732 | 4 | 317 4 4  | 0 0 | 0 0 | 0 0 | 0 0 | 0 0 | 15.08 |
| IPRO17795 | 4 | 63 0 0   | 0 0 | 0 0 | 0 0 | 3 3 | 0 0 | 16.47 |
| IPRO17916 | 4 | 72 0 0   | 0 0 | 2 1 | 0 0 | 3 1 | 2 0 | 36.76 |
| IPRO18029 | 4 | 6 0 0    | 0 0 | 0 0 | 1 1 | 0 0 | 3 3 | 30.56 |
| IPRO18119 | 4 | 238 1 1  | 0 0 | 3 3 | 0 0 | 0 0 | 0 0 | 33.73 |
| IPRO18123 | 4 | 87 0 0   | 0 0 | 0 0 | 0 0 | 0 0 | 4 4 | 27.1  |
| IPRO18287 | 4 | 36 0 0   | 0 0 | 0 0 | 0 0 | 4 4 | 0 0 | 82.49 |
| IPRO18351 | 4 | 21 0 0   | 0 0 | 2 2 | 0 0 | 0 0 | 2 2 | 40.12 |
| IPRO18461 | 4 | 735 4 4  | 0 0 | 0 0 | 0 0 | 0 0 | 0 0 | 10.81 |
| IPRO18465 | 4 | 35 0 0   | 0 0 | 0 0 | 0 0 | 3 3 | 2 2 | 34.26 |
| IPRO18467 | 4 | 109 0 0  | 0 0 | 4 4 | 0 0 | 0 0 | 0 0 | 57.23 |
| IPRO18535 | 4 | 119 1 1  | 0 0 | 0 0 | 0 0 | 3 3 | 0 0 | 35.66 |
| IPRO18612 | 4 | 70 0 0   | 0 0 | 3 3 | 0 0 | 0 0 | 0 0 | 36.42 |
| IPRO18634 | 4 | 103 4 4  | 0 0 | 0 0 | 0 0 | 0 0 | 0 0 | 43.17 |
| IPRO18651 | 4 | 84 2 1   | 0 0 | 2 1 | 1 0 | 0 0 | 0 0 | 9.98  |
| IPRO18717 | 4 | 63 4 4   | 0 0 | 0 0 | 0 0 | 0 0 | 0 0 | 30.28 |
| IPRO18756 | 4 | 62 4 4   | 0 0 | 0 0 | 0 0 | 0 0 | 0 0 | 19.4  |
| IPRO18821 | 4 | 241 3 2  | 2 1 | 0 0 | 0 0 | 0 0 | 0 0 | 19.67 |
| IPRO18823 | 4 | 44 0 0   | 0 0 | 0 0 | 0 0 | 4 4 | 0 0 | 9.49  |
| IPRO18873 | 4 | 102 4 4  | 0 0 | 0 0 | 0 0 | 0 0 | 0 0 | 24.48 |
| IPRO18913 | 4 | 52 4 4   | 0 0 | 0 0 | 0 0 | 0 0 | 0 0 | 21.13 |
| IPRO18934 | 4 | 297 0 0  | 2 1 | 1 0 | 1 0 | 2 1 | 2 1 | 20.78 |
| IPRO18940 | 4 | 105 0 0  | 0 0 | 0 0 | 0 0 | 2 1 | 3 2 | 60.23 |
| IPRO18954 | 4 | 47 4 2   | 1 0 | 0 0 | 0 0 | 2 0 | 0 0 | 29.27 |
| IPRO18955 | 4 | 185 0 0  | 0 0 | 3 2 | 1 0 | 2 1 | 1 0 | 32.08 |
| IPRO18959 | 4 | 284 3 3  | 0 0 | 0 0 | 0 0 | 1 1 | 0 0 | 24.68 |
| IPRO18970 | 4 | 261 4 2  | 0 0 | 0 0 | 0 0 | 2 0 | 0 0 | 45.64 |
| IPRO18979 | 4 | 17 0 0   | 0 0 | 0 0 | 0 0 | 0 0 | 5 5 | 18.7  |
| IPRO18999 | 4 | 75 0 0   | 0 0 | 3 0 | 1 0 | 2 0 | 1 0 | 56.4  |
| IPRO19015 | 4 | 58 0 0   | 0 0 | 0 0 | 0 0 | 4 1 | 3 0 | 39.2  |
| IPRO19018 | 4 | 73 0 0   | 0 0 | 0 0 | 0 0 | 0 0 | 3 3 | 40.32 |
| IPRO19020 | 4 | 66 4 4   | 0 0 | 0 0 | 0 0 | 0 0 | 0 0 | 13.2  |
| IPRO19029 | 4 | 18 3 3   | 0 0 | 1 1 | 0 0 | 0 0 | 0 0 | 16.66 |
| IPRO19049 | 4 | 82 0 0   | 0 0 | 2 2 | 0 0 | 2 2 | 0 0 | 11.61 |
| IPRO19065 | 4 | 24 4 1   | 3 0 | 0 0 | 0 0 | 0 0 | 0 0 | 9.71  |
| IPRO19189 | 4 | 75 0 0   | 0 0 | 0 0 | 0 0 | 0 0 | 4 4 | 26.66 |
| IPRO19301 | 4 | 360 4 4  | 0 0 | 0 0 | 0 0 | 0 0 | 0 0 | 27.28 |
| IPRO19305 | 4 | 121 4 4  | 0 0 | 0 0 | 0 0 | 0 0 | 0 0 | 32.23 |
| IPRO19367 | 4 | 60 0 0   | 0 0 | 3 3 | 0 0 | 1 1 | 0 0 | 47.46 |
| IPRO19369 | 4 | 68 0 0   | 0 0 | 0 0 | 0 0 | 0 0 | 4 4 | 29.19 |
| IPRO19385 | 4 | 41 0 0   | 0 0 | 2 2 | 2 2 | 0 0 | 0 0 | 39.6  |
| IPRO19400 | 4 | 90 0 0   | 0 0 | 4 4 | 0 0 | 0 0 | 0 0 | 28.12 |
| IPRO19432 | 4 | 212 4 3  | 1 0 | 0 0 | 0 0 | 0 0 | 0 0 | 22.85 |
| IPRO19479 | 4 | 1144 2 1 | 1 0 | 2 1 | 1 0 | 2 1 | 1 0 | 36.16 |
| IPRO19492 | 4 | 34 4 4   | 0 0 | 0 0 | 0 0 | 0 0 | 0 0 | 31.15 |
| IPRO19528 | 4 | 47 0 0   | 0 0 | 0 0 | 0 0 | 1 1 | 2 2 | 33    |
| IPRO19529 | 4 | 55 0 0   | 0 0 | 0 0 | 0 0 | 4 3 | 1 0 | 20.71 |
| IPRO19533 | 4 | 524 4 3  | 0 0 | 1 0 | 0 0 | 0 0 | 0 0 | 26.07 |
| IPRO19537 | 4 | 30 0 0   | 0 0 | 0 0 | 2 2 | 0 0 | 2 2 | 44.99 |
| IPRO19589 | 4 | 9 0 0    | 0 0 | 2 0 | 1 0 | 3 0 | 4 1 | 10.72 |
| IPRO19595 | 4 | 165 3 2  | 0 0 | 1 0 | 0 0 | 1 1 | 0 0 | 20.72 |
| IPRO19599 | 4 | 9 4 4    | 0 0 | 0 0 | 0 0 | 0 0 | 0 0 | 56.61 |
| IPRO19888 | 4 | 2682 1 0 | 3 2 | 1 1 | 0 0 | 0 0 | 0 0 | 24.57 |
| IPRO20070 | 4 | 830 3 2  | 0 0 | 1 0 | 0 0 | 0 0 | 2 1 | 42.29 |
| IPRO20547 | 4 | 474 1 0  | 0 0 | 4 3 | 0 0 | 0 0 | 1 0 | 28.91 |
| IPRO20582 | 4 | 618 3 3  | 0 0 | 0 0 | 0 0 | 0 0 | 0 0 | 47.53 |
| IPRO20630 | 4 | 1003 1 0 | 1 0 | 3 2 | 2 0 | 2 0 | 2 0 | 35.73 |
| IPRO20636 | 4 | 16 2 1   | 0 0 | 2 1 | 0 0 | 1 0 | 1 0 | 9.13  |
| IPRO20839 | 4 | 98 0 0   | 0 0 | 3 2 | 1 0 | 1 0 | 2 1 | 45.2  |
| IPRO20945 | 4 | 654 4 4  | 0 0 | 0 0 | 0 0 | 0 0 | 0 0 | 10.18 |
| IPRO20953 | 4 | 505 4 2  | 0 0 | 2 0 | 0 0 | 0 0 | 0 0 | 27.57 |
| IPRO20972 | 4 | 14 4 4   | 0 0 | 0 0 | 0 0 | 0 0 | 0 0 | 27.43 |
| IPRO21029 | 4 | 118 4 4  | 0 0 | 0 0 | 0 0 | 0 0 | 0 0 | 36.81 |
| IPRO21034 | 4 | 78 4 4   | 0 0 | 0 0 | 0 0 | 0 0 | 0 0 | 51.43 |
| IPRO21046 | 4 | 51 4 4   | 0 0 | 0 0 | 0 0 | 0 0 | 0 0 | 81.57 |
| IPRO21054 | 4 | 73 0 0   | 0 0 | 0 0 | 0 0 | 4 4 | 0 0 | 9.67  |
| IPRO21094 | 4 | 43 0 0   | 0 0 | 4 4 | 0 0 | 0 0 | 0 0 | 48.54 |
| IPRO21101 | 4 | 12 0 0   | 0 0 | 0 0 | 0 0 | 1 1 | 0 0 | 67.24 |
| IPRO21104 | 4 | 167 4 4  | 0 0 | 0 0 | 0 0 | 0 0 | 0 0 | 12.37 |
| IPRO21122 | 4 | 46 1 1   | 0 0 | 0 0 | 0 0 | 2 2 | 0 0 | 15.23 |
| IPRO21141 | 4 | 247 1 1  | 0 0 | 2 2 | 0 0 | 0 0 | 3 3 | 17.61 |
| IPRO21153 | 4 | 475 4 3  | 0 0 | 1 0 | 0 0 | 0 0 | 0 0 | 21.24 |
| IPRO21277 | 4 | 25 4 4   | 0 0 | 0 0 | 0 0 | 0 0 | 0 0 | 54.51 |
| IPRO21418 | 4 | 77 0 0   | 0 0 | 1 0 | 1 0 | 4 3 | 1 0 | 31.63 |
| IPRO21536 | 4 | 9 0 0    | 0 0 | 0 0 | 0 0 | 0 0 | 4 4 | 71.75 |
| IPRO21619 | 4 | 15 0 0   | 0 0 | 0 0 | 0 0 | 0 0 | 4 4 | 74.66 |
| IPRO21629 | 4 | 38 0 0   | 0 0 | 0 0 | 0 0 | 0 0 | 4 4 | 38.29 |
| IPRO21718 | 4 | 86 0 0   | 0 0 | 4 0 | 3 0 | 4 0 | 3 0 | 28.65 |
| IPRO21726 | 4 | 62 0 0   | 0 0 | 1 0 | 1 0 | 1 0 | 1 0 | 45.79 |
| IPRO21766 | 4 | 171 4 4  | 0 0 | 0 0 | 0 0 | 0 0 | 0 0 | 28.11 |
| IPRO21774 | 4 | 29 0 0   | 0 0 | 0 0 | 0 0 | 0 0 | 5 5 | 44.73 |
| IPRO21775 | 4 | 71 0 0   | 0 0 | 4 4 | 0 0 | 0 0 | 0 0 | 59.98 |
| IPRO21778 | 4 | 118 4 4  | 0 0 | 0 0 | 0 0 | 0 0 | 0 0 | 19.77 |
| IPRO21825 | 4 | 84 0 0   | 0 0 | 4 4 | 0 0 | 0 0 | 0 0 | 35.29 |
| IPRO21829 | 4 | 61 0 0   | 0 0 | 0 0 | 0 0 | 0 0 | 2 0 | 27.35 |
| IPRO21841 | 4 | 77 0 0   | 0 0 | 1 0 | 1 0 | 4 3 | 1 0 | 46.22 |
| IPRO21883 | 4 | 44 0 0   | 0 0 | 4 4 | 0 0 | 0 0 | 0 0 | 33.74 |
| IPRO21931 | 4 | 31 0 0   | 0 0 | 0 0 | 0 0 | 0 0 | 4 4 | 92.42 |
| IPRO21943 | 4 | 105 4 1  | 3 0 | 0 0 | 0 0 | 0 0 | 0 0 | 12.68 |
| IPRO21963 | 4 | 19 0 0   | 0 0 | 0 0 | 0 0 | 0 0 | 4 4 | 76.43 |
| IPRO21966 | 4 | 65 0 0   | 0 0 | 1 0 | 1 0 | 4 3 | 1 0 | 54.96 |
| IPRO21987 | 4 | 48 0 0   | 0 0 | 0 0 | 0 0 | 0 0 | 3 3 | 34.97 |
| IPRO21993 | 4 | 140 4 4  | 0 0 | 0 0 | 0 0 | 0 0 | 0 0 | 27.93 |
| IPRO21998 | 4 | 80 0 0   | 0 0 | 4 4 | 0 0 | 0 0 | 0 0 | 70.98 |
| IPRO22001 | 4 | 62 4 4   | 0 0 | 0 0 | 0 0 | 0 0 | 0 0 | 59.96 |
| IPRO22003 | 4 | 58 0 0   | 0 0 | 4 4 | 0 0 | 0 0 | 0 0 | 29.85 |
| IPRO22011 | 4 | 8 0 0    | 0 0 | 0 0 | 0 0 | 0 0 | 4 4 | 52.68 |
| IPRO22030 | 4 | 79 0 0   | 0 0 | 2 0 | 1 0 | 2 0 | 4 2 | 31.52 |
| IPRO22033 | 4 | 74 0 0   | 0 0 | 2 0 | 1 0 | 2 1 | 3 1 | 29.5  |
| IPRO22062 | 4 | 126 4 4  | 0 0 | 0 0 | 0 0 | 0 0 | 0 0 | 23.8  |
| IPRO22078 | 4 | 34 2 2   | 0 0 | 0 0 | 0 0 | 0 0 | 2 2 | 29    |
| IPRO22094 | 4 | 47 4 4   | 0 0 | 0 0 | 0 0 | 0 0 | 0 0 | 42.96 |
| IPRO22099 | 4 | 30 0 0   | 0 0 | 4 2 | 2 0 | 1 0 | 0 0 | 35.15 |
| IPRO22105 | 4 | 30 0 0   | 0 0 | 4 2 | 2 0 | 1 0 | 0 0 | 53.41 |
| IPRO22138 | 4 | 117 4 2  | 2 0 | 0 0 | 0 0 | 0 0 | 0 0 | 21.7  |
| IPRO22141 | 4 | 72 0 0   | 0 0 | 0 0 | 0 0 | 0 0 | 4 4 | 45.91 |
| IPRO22170 | 4 | 88 2 2   | 0 0 | 2 1 | 0 0 | 0 0 | 1 0 | 14.68 |
| IPRO22175 | 4 | 54 0 0   | 0 0 | 4 3 | 0 0 | 0 0 | 1 0 | 22.19 |
| IPRO22209 | 4 | 69 0 0   | 0 0 | 1 0 | 1 0 | 1 0 | 1 0 | 32.04 |
| IPRO22226 | 4 | 65 0 0   | 0 0 | 4 4 | 0 0 | 0 0 | 0 0 | 27.14 |
| IPRO22252 | 4 | 35 0 0   | 0 0 | 0 0 | 0 0 | 0 0 | 4 4 | 36.48 |
| PF02002   | 4 | 125 1 1  | 0 0 | 0 0 | 0 0 | 2 2 | 1 1 | 13.33 |
| PF02244   | 4 | 309 0 0  | 0 0 | 0 0 | 0 0 | 1 0 | 2 1 | 14.59 |
| PF03279   | 4 | 628 4 4  | 0 0 | 0 0 | 0 0 | 0 0 | 0 0 | 42.7  |
| PF03045   | 4 | 52 0 0   | 0 0 | 0 0 | 0 0 | 0 0 | 4 4 | 27.38 |
| PF03203   | 4 | 73 4 4   | 0 0 | 0 0 | 0 0 | 0 0 | 0 0 | 17.88 |
| PF03237   | 4 | 411 4 4  | 0 0 | 0 0 | 0 0 | 0 0 | 0 0 | 4.58  |
| PF04329   | 4 | 14 4 4   | 0 0 | 0 0 | 0 0 | 0 0 | 0 0 | 18.65 |
| PF04330   | 4 | 12 4 4   | 0 0 | 0 0 | 0 0 | 0 0 | 0 0 | 21.94 |
| PF04524   | 4 | 54 4 4   | 0 0 | 0 0 | 0 0 | 0 0 | 0 0 | 50.38 |
| PF04801   | 4 | 79 0 0   | 0 0 | 0 0 | 0 0 | 4 4 | 0 0 | 22.4  |
| PF05804   | 4 | 160 0 0  | 0 0 | 2 1 | 0 0 | 0 0 | 2 1 | 10.39 |
| PF06013   | 4 | 416 5 5  | 0 0 | 0 0 | 0 0 | 0 0 | 0 0 | 9.41  |
| PF06268   | 4 | 184 1 1  | 0 0 | 1 1 | 0 0 | 1 1 | 0 0 | 16.68 |
| PF06425   | 4 | 70 0 0   | 0 0 | 1 1 | 0 0 | 0 0 | 3 3 | 29.59 |
| PF06807   | 4 | 120 0 0  | 0 0 | 3 2 | 1 0 | 2 1 | 1 1 | 18.23 |
| PF07584   | 4 | 119 4 3  | 1 0 | 0 0 | 0 0 | 0 0 | 0 0 | 27.12 |
| PF08169   | 4 | 25 0 0   | 0 0 | 0 0 | 0 0 | 0 0 | 4 4 | 54.68 |
| PF08190   | 4 | 124 0 0  | 0 0 | 0 0 | 0 0 | 0 0 | 4 4 | 12.41 |
| PF09031   | 4 | 17 0 0   | 0 0 | 0 0 | 0 0 | 0 0 | 5 5 | 57.25 |

|                 |   |          |     |     |     |     |     |       |
|-----------------|---|----------|-----|-----|-----|-----|-----|-------|
| PF09039         | 4 | 25 4 4   | 0 0 | 0 0 | 0 0 | 0 0 | 0 0 | 23.69 |
| PF09162         | 4 | 44 0 0   | 0 0 | 0 0 | 0 0 | 0 0 | 3 3 | 35.58 |
| PF09273         | 4 | 141 0 0  | 0 0 | 3 2 | 0 0 | 2 1 | 1 0 | 11.33 |
| PF09402         | 4 | 91 0 0   | 0 0 | 0 0 | 0 0 | 0 0 | 5 5 | 13.31 |
| PF09607         | 4 | 29 0 0   | 0 0 | 0 0 | 0 0 | 0 0 | 5 5 | 49.64 |
| PF09718         | 4 | 135 4 4  | 0 0 | 0 0 | 0 0 | 0 0 | 0 0 | 28.56 |
| PF10018         | 4 | 81 0 0   | 0 0 | 4 4 | 0 0 | 0 0 | 0 0 | 19.33 |
| PF10131         | 4 | 24 4 4   | 0 0 | 0 0 | 0 0 | 0 0 | 0 0 | 5.14  |
| PF10519         | 4 | 161 0 0  | 0 0 | 0 0 | 0 0 | 4 4 | 0 0 | 12.41 |
| PF10560         | 4 | 57 0 0   | 0 0 | 0 0 | 0 0 | 3 3 | 1 1 | 24.7  |
| PF10577         | 4 | 21 3 3   | 0 0 | 0 0 | 0 0 | 0 0 | 2 2 | 34.18 |
| PF11705         | 4 | 78 0 0   | 0 0 | 0 0 | 0 0 | 3 3 | 0 0 | 19.5  |
| PF11764         | 4 | 54 0 0   | 0 0 | 0 0 | 0 0 | 4 1 | 3 0 | 27.81 |
| PF11767         | 4 | 26 0 0   | 0 0 | 0 0 | 0 0 | 4 4 | 0 0 | 50.95 |
| PF11860         | 4 | 40 4 4   | 0 0 | 0 0 | 0 0 | 0 0 | 0 0 | 32.08 |
| PF11870         | 4 | 166 4 4  | 0 0 | 0 0 | 0 0 | 0 0 | 0 0 | 19.58 |
| PF11900         | 4 | 57 0 0   | 0 0 | 4 4 | 0 0 | 0 0 | 0 0 | 35.14 |
| PF11933         | 4 | 59 0 0   | 0 0 | 0 0 | 0 0 | 0 0 | 4 4 | 31.02 |
| PF11942         | 4 | 59 0 0   | 0 0 | 3 1 | 1 0 | 2 0 | 3 1 | 28    |
| PF12008         | 4 | 135 4 2  | 2 0 | 0 0 | 0 0 | 0 0 | 0 0 | 14.17 |
| PF12010         | 4 | 72 1 1   | 0 0 | 0 0 | 0 0 | 0 0 | 0 0 | 31.63 |
| PF12072         | 4 | 285 4 2  | 0 0 | 0 0 | 0 0 | 0 0 | 2 0 | 27.89 |
| PF12157         | 4 | 84 0 0   | 0 0 | 3 1 | 1 0 | 2 1 | 2 0 | 30.99 |
| PF12162         | 4 | 17 0 0   | 0 0 | 0 0 | 0 0 | 0 0 | 4 4 | 79.72 |
| PF12188         | 4 | 9 0 0    | 0 0 | 0 0 | 0 0 | 0 0 | 4 4 | 61.42 |
| PF12254         | 4 | 59 0 0   | 0 0 | 4 0 | 2 0 | 3 0 | 4 0 | 46.94 |
| PF12316         | 4 | 33 0 0   | 0 0 | 0 0 | 0 0 | 0 0 | 4 4 | 53.85 |
| PF12333         | 4 | 65 0 0   | 0 0 | 2 2 | 0 0 | 0 0 | 2 2 | 21.38 |
| PF12399         | 4 | 1868 4 2 | 2 0 | 2 0 | 0 0 | 0 0 | 0 0 | 43.8  |
| PF12439         | 4 | 74 4 3   | 1 0 | 0 0 | 0 0 | 0 0 | 0 0 | 21.19 |
| PTHR10183       | 4 | 20 0 0   | 0 0 | 1 0 | 0 0 | 0 0 | 1 0 | 21.69 |
| PTHR10499-SF114 | 4 | 22 4 4   | 0 0 | 0 0 | 0 0 | 0 0 | 0 0 | 19.48 |
| PTHR10527-SF3   | 4 | 15 0 0   | 0 0 | 4 2 | 1 0 | 2 0 | 0 0 | 36.09 |
| PTHR10593       | 4 | 45 1 1   | 0 0 | 3 2 | 0 0 | 0 0 | 1 0 | 57.97 |
| PTHR10596       | 4 | 12 2 1   | 0 0 | 0 0 | 0 0 | 0 0 | 3 2 | 10.91 |
| PTHR10615       | 4 | 13 0 0   | 0 0 | 1 1 | 0 0 | 0 0 | 3 3 | 65.03 |
| PTHR10668       | 4 | 28 4 4   | 0 0 | 0 0 | 0 0 | 0 0 | 0 0 | 15.81 |
| PTHR10742       | 4 | 39 2 2   | 0 0 | 0 0 | 0 0 | 3 2 | 0 0 | 17.47 |
| PTHR10887-SF27  | 4 | 91 0 0   | 0 0 | 3 3 | 0 0 | 1 1 | 0 0 | 29.55 |
| PTHR10992       | 4 | 367 1 1  | 0 0 | 0 0 | 0 0 | 3 3 | 0 0 | 3.38  |
| PTHR11102-SF11  | 4 | 15 3 3   | 0 0 | 0 0 | 1 1 | 0 0 | 0 0 | 9.64  |
| PTHR11271       | 4 | 68 4 2   | 0 0 | 0 0 | 0 0 | 2 0 | 0 0 | 24.2  |
| PTHR11539       | 4 | 11 0 0   | 0 0 | 0 0 | 0 0 | 0 0 | 3 3 | 76.73 |
| PTHR11632       | 4 | 53 2 1   | 0 0 | 0 0 | 0 2 | 0 0 | 0 0 | 45.81 |
| PTHR11697       | 4 | 20 0 0   | 0 0 | 2 2 | 0 0 | 0 0 | 2 2 | 16.91 |
| PTHR11908       | 4 | 8 3 3    | 0 0 | 1 1 | 0 0 | 0 0 | 0 0 | 12.73 |
| PTHR12277       | 4 | 72 3 3   | 0 0 | 1 1 | 0 0 | 0 0 | 0 0 | 12.91 |
| PTHR13789       | 4 | 46 4 2   | 0 0 | 2 0 | 0 0 | 1 0 | 0 0 | 18.46 |
| PTHR14025       | 4 | 9 3 3    | 0 0 | 0 0 | 0 0 | 0 0 | 1 1 | 19.14 |
| PTHR15859       | 4 | 27 0 0   | 0 0 | 0 0 | 0 0 | 0 0 | 4 4 | 67.85 |
| PTHR16056       | 4 | 64 3 3   | 0 0 | 0 0 | 0 0 | 0 0 | 1 1 | 27.21 |
| PTHR18895       | 4 | 20 3 3   | 0 0 | 0 0 | 0 0 | 0 0 | 0 0 | 13.39 |
| PTHR18901       | 4 | 45 1 1   | 0 0 | 1 1 | 2 2 | 0 0 | 0 0 | 9.98  |
| PTHR19328-SF13  | 4 | 22 4 4   | 0 0 | 0 0 | 0 0 | 0 0 | 0 0 | 25.39 |
| PTHR19328-SF2   | 4 | 5 4 4    | 0 0 | 0 0 | 0 0 | 0 0 | 0 0 | 19.09 |
| PTHR19955       | 4 | 19 0 0   | 0 0 | 0 0 | 0 0 | 4 4 | 0 0 | 30.14 |
| PTHR19959-SF15  | 4 | 26 4 4   | 0 0 | 0 0 | 0 0 | 0 0 | 0 0 | 32.32 |
| PTHR21248       | 4 | 313 4 3  | 1 0 | 0 0 | 1 0 | 0 0 | 0 0 | 16.38 |
| PTHR21307       | 4 | 21 0 0   | 0 0 | 0 0 | 0 0 | 0 0 | 3 3 | 62.64 |
| PTHR21385       | 4 | 27 0 0   | 0 0 | 3 3 | 0 0 | 0 0 | 1 1 | 42.63 |
| PTHR22767       | 4 | 9 0 0    | 0 0 | 3 1 | 2 0 | 2 1 | 0 0 | 21.01 |
| PTHR22841       | 4 | 7 1 1    | 0 0 | 0 0 | 0 0 | 3 3 | 0 0 | 17    |
| PTHR22870       | 4 | 49 2 0   | 0 0 | 0 0 | 0 0 | 4 2 | 1 0 | 11.55 |
| PTHR22938       | 4 | 103 0 0  | 0 0 | 1 1 | 1 1 | 2 2 | 0 0 | 26.48 |
| PTHR23083-SF24  | 4 | 24 4 4   | 0 0 | 0 0 | 0 0 | 0 0 | 0 0 | 10.26 |
| PTHR23083-SF7   | 4 | 8 0 0    | 0 0 | 2 0 | 0 0 | 0 0 | 4 2 | 55.7  |
| PTHR23125-SF33  | 4 | 28 3 3   | 0 0 | 0 0 | 0 0 | 1 1 | 0 0 | 25.82 |
| PTHR23154-SF124 | 4 | 7 0 0    | 0 0 | 0 0 | 0 0 | 0 0 | 3 3 | 13.3  |
| PTHR23155-SF37  | 4 | 143 1 1  | 0 0 | 3 3 | 0 0 | 0 0 | 0 0 | 23.45 |
| PTHR23213-SF18  | 4 | 75 0 0   | 0 0 | 4 4 | 0 0 | 0 0 | 0 0 | 22.78 |
| PTHR23258-SF473 | 4 | 23 1 1   | 0 0 | 3 3 | 0 0 | 0 0 | 0 0 | 21.19 |
| PTHR23303       | 4 | 22 3 3   | 1 1 | 0 0 | 0 0 | 0 0 | 0 0 | 28.83 |
| PTHR23320       | 4 | 6 4 4    | 0 0 | 0 0 | 0 0 | 0 0 | 1 1 | 29.18 |
| PTHR23416-SF2   | 4 | 211 4 2  | 0 0 | 1 0 | 0 0 | 1 0 | 0 0 | 38.85 |
| TIGR00426       | 4 | 88 4 4   | 0 0 | 0 0 | 0 0 | 0 0 | 0 0 | 49.62 |
| TIGR01730       | 4 | 751 4 4  | 0 0 | 0 0 | 0 0 | 0 0 | 0 0 | 8.47  |
| TIGR02486       | 4 | 110 4 4  | 0 0 | 0 0 | 0 0 | 0 0 | 0 0 | 27.76 |
| TIGR02604       | 4 | 20 4 4   | 0 0 | 0 0 | 0 0 | 0 0 | 0 0 | 25.02 |
| TIGR02777       | 4 | 27 4 4   | 0 0 | 0 0 | 0 0 | 0 0 | 0 0 | 52.04 |
| TIGR03061       | 4 | 141 4 2  | 2 0 | 0 0 | 0 0 | 0 0 | 0 0 | 34.13 |
| IPR000030       | 5 | 561 5 5  | 0 0 | 0 0 | 0 0 | 0 0 | 0 0 | 34.09 |
| IPR000055       | 5 | 1583 7 6 | 1 0 | 0 0 | 0 0 | 0 0 | 0 0 | 2.22  |
| IPR000127       | 5 | 377 0 0  | 0 0 | 4 0 | 3 0 | 4 0 | 5 1 | 27.37 |
| IPR000164       | 5 | 416 0 0  | 0 0 | 1 1 | 0 0 | 1 1 | 2 2 | 39.21 |
| IPR000418       | 5 | 440 0 0  | 0 0 | 0 0 | 0 0 | 0 0 | 5 5 | 51.53 |
| IPR000519       | 5 | 91 0 0   | 0 0 | 0 0 | 0 0 | 0 0 | 6 6 | 37.05 |
| IPR000539       | 5 | 219 0 0  | 0 0 | 0 0 | 0 0 | 0 0 | 5 5 | 38.18 |
| IPR000667       | 5 | 424 5 5  | 0 0 | 0 0 | 0 0 | 0 0 | 0 0 | 19.09 |
| IPR000712       | 5 | 174 0 0  | 0 0 | 0 0 | 0 0 | 0 0 | 5 5 | 24.01 |
| IPR000740       | 5 | 972 1 1  | 2 2 | 2 2 | 0 0 | 0 0 | 0 0 | 24.47 |
| IPR000741       | 5 | 333 0 0  | 0 0 | 0 0 | 0 0 | 0 0 | 0 0 | 38.65 |
| IPR000771       | 5 | 1062 2 2 | 0 0 | 2 2 | 0 0 | 1 1 | 0 0 | 29.25 |
| IPR000807       | 5 | 704 2 2  | 0 0 | 0 0 | 0 0 | 1 1 | 2 2 | 47.45 |
| IPR000825       | 5 | 1131 4 4 | 1 1 | 1 1 | 0 0 | 0 0 | 0 0 | 19.4  |
| IPR000883       | 5 | 1752 4 2 | 1 0 | 0 0 | 0 0 | 0 0 | 1 0 | 20.98 |
| IPR000885       | 5 | 116 0 0  | 0 0 | 0 0 | 0 0 | 5 5 | 0 0 | 41.4  |
| IPR000932       | 5 | 241 1 1  | 0 0 | 5 5 | 0 0 | 0 0 | 0 0 | 23.12 |
| IPR000944       | 5 | 1590 4 4 | 1 1 | 0 0 | 0 0 | 0 0 | 0 0 | 20.33 |
| IPR000962       | 5 | 1064 5 4 | 1 0 | 0 0 | 0 0 | 0 0 | 0 0 | 26.99 |
| IPR001106       | 5 | 597 1 1  | 0 0 | 2 2 | 0 0 | 1 1 | 1 1 | 30.1  |
| IPR001129       | 5 | 549 0 0  | 0 0 | 0 0 | 0 0 | 3 3 | 1 1 | 7.88  |
| IPR001163       | 5 | 598 0 0  | 0 0 | 0 2 | 0 0 | 0 2 | 3 3 | 22.11 |
| IPR001204       | 5 | 908 1 1  | 0 0 | 2 2 | 0 0 | 2 2 | 0 0 | 27.24 |
| IPR001240       | 5 | 708 2 0  | 1 0 | 1 1 | 0 0 | 3 2 | 0 0 | 28.88 |
| IPR001266       | 5 | 165 0 0  | 0 0 | 3 3 | 0 0 | 2 2 | 0 0 | 44.31 |
| IPR001286       | 5 | 14 5 5   | 0 0 | 0 0 | 0 0 | 0 0 | 0 0 | 41.8  |
| IPR001303       | 5 | 1668 5 4 | 0 0 | 1 0 | 0 0 | 0 0 | 0 0 | 15.12 |
| IPR001342       | 5 | 978 4 1  | 3 1 | 0 0 | 1 0 | 2 0 | 0 0 | 33.65 |
| IPR001378       | 5 | 416 4 3  | 2 1 | 0 0 | 0 0 | 0 0 | 0 0 | 32.31 |
| IPR001405       | 5 | 859 5 5  | 0 0 | 0 0 | 0 0 | 0 0 | 0 0 | 33.96 |
| IPR001425       | 5 | 89 0 0   | 0 0 | 5 5 | 0 0 | 0 0 | 0 0 | 15.78 |
| IPR001518       | 5 | 810 4 4  | 0 0 | 0 0 | 0 0 | 1 1 | 0 0 | 41.61 |
| IPR001523       | 5 | 319 2 2  | 0 0 | 0 0 | 0 0 | 0 0 | 3 3 | 61.85 |
| IPR001577       | 5 | 277 1 1  | 0 0 | 2 2 | 1 1 | 0 0 | 0 0 | 17.8  |
| IPR001602       | 5 | 584 3 3  | 0 0 | 0 0 | 0 0 | 0 0 | 2 2 | 34.75 |
| IPR001661       | 5 | 369 5 4  | 0 0 | 0 0 | 0 0 | 1 0 | 1 1 | 21.69 |
| IPR001666       | 5 | 107 0 0  | 0 0 | 0 0 | 1 1 | 0 0 | 2 2 | 46.15 |
| IPR001757       | 5 | 21 2 2   | 0 0 | 2 2 | 1 1 | 0 0 | 2 0 | 4.05  |
| IPR001857       | 5 | 845 0 0  | 0 0 | 2 2 | 0 0 | 1 1 | 1 1 | 48.97 |
| IPR001870       | 5 | 16 0 0   | 0 0 | 0 0 | 0 0 | 0 0 | 5 5 | 26.45 |
| IPR002028       | 5 | 755 4 4  | 0 0 | 0 0 | 0 0 | 1 1 | 0 0 | 33.69 |
| IPR002054       | 5 | 228 1 0  | 1 0 | 2 1 | 0 0 | 4 3 | 1 0 | 23.49 |
| IPR002060       | 5 | 725 3 3  | 0 0 | 0 0 | 0 0 | 1 1 | 1 1 | 12.44 |
| IPR002073       | 5 | 116 0 0  | 0 0 | 0 0 | 2 1 | 0 0 | 4 3 | 28.6  |
| IPR002142       | 5 | 1241 5 5 | 0 0 | 0 0 | 0 0 | 0 0 | 0 0 | 20.56 |
| IPR002146       | 5 | 1012 3 2 | 0 0 | 2 2 | 0 0 | 0 0 | 0 0 | 16.61 |
| IPR002159       | 5 | 299 0 0  | 0 0 | 3 3 | 0 0 | 0 0 | 2 2 | 20.23 |
| IPR002164       | 5 | 356 0 0  | 0 0 | 0 0 | 0 0 | 4 4 | 1 1 | 22.79 |
| IPR002202       | 5 | 330 3 3  | 0 0 | 0 0 | 0 0 | 1 0 | 2 1 | 25.23 |
| IPR002208       | 5 | 1024 0 0 | 1 0 | 5 4 | 1 0 | 1 0 | 1 0 | 35.04 |
| IPR002326       | 5 | 375 3 3  | 0 0 | 0 0 | 0 0 | 0 0 | 1 1 | 32.4  |
| IPR002481       | 5 | 1703 5 5 | 0 0 | 0 0 | 0 0 | 0 0 | 0 0 | 20.89 |
| IPR002515       | 5 | 229 0 0  | 0 0 | 0 0 | 0 0 | 0 0 | 6 6 | 65.82 |
| IPR002541       | 5 | 1442 3 3 | 0 0 | 2 2 | 0 0 | 0 0 | 0 0 | 15.49 |
| IPR002560       | 5 | 628 5 5  | 0 0 | 0 0 | 0 0 | 0 0 | 0 0 | 22.86 |
| IPR002577       | 5 | 1618 4 4 | 1 1 | 0 0 | 0 0 | 0 0 | 0 0 | 29.7  |
| IPR002618       | 5 | 301 0 0  | 0 0 | 0 0 | 0 0 | 1 1 | 0 0 | 19.9  |
| IPR002629       | 5 | 803 2 1  | 1 0 | 5 4 | 0 0 | 1 0 | 0 0 | 23.24 |
| IPR002638       | 5 | 815 3 2  | 3 2 | 1 0 | 0 0 | 1 0 | 1 0 | 35.17 |
| IPR002653       | 5 | 232 0 0  | 0 0 | 2 1 | 1 0 | 0 0 | 5 4 | 47.53 |
| IPR002698       | 5 | 859 0 0  | 1 1 | 2 2 | 0 0 | 0 0 | 2 2 | 20.95 |
| IPR002710       | 5 | 14 0 0   | 0 0 | 4 4 | 0 0 | 1 1 | 0 0 | 14.55 |
| IPR002720       | 5 | 79 0 0   | 0 0 | 0 0 | 0 0 | 0 0 | 5 3 | 32.9  |
| IPR002762       | 5 | 649 5 3  | 2 0 | 0 0 | 0 0 | 0 0 | 0 0 | 15.5  |
| IPR002773       | 5 | 220 0 0  | 0 0 | 5 5 | 0 0 | 0 0 | 0 0 | 29.44 |
| IPR002777       | 5 | 404 0 0  | 0 0 | 1 1 | 0 0 | 1 1 | 3 3 | 12.39 |
| IPR002833       | 5 | 222 0 0  | 0 0 |     |     |     |     |       |

|           |   |          |     |     |     |     |     |       |
|-----------|---|----------|-----|-----|-----|-----|-----|-------|
| IPR002838 | 5 | 388 5 5  | 0 0 | 0 0 | 0 0 | 0 0 | 0 0 | 18.06 |
| IPR002898 | 5 | 2017 6 6 | 0 0 | 0 0 | 0 0 | 0 0 | 0 0 | 16.51 |
| IPR002969 | 5 | 1300 3 3 | 0 0 | 0 0 | 0 0 | 0 0 | 2 2 | 43.93 |
| IPR003035 | 5 | 125 0 0  | 0 0 | 5 5 | 0 0 | 0 0 | 0 0 | 51.13 |
| IPR003106 | 5 | 187 1 1  | 1 1 | 3 3 | 0 0 | 0 0 | 0 0 | 35.82 |
| IPR003110 | 5 | 86 0 0   | 0 0 | 0 0 | 0 0 | 0 0 | 6 6 | 29.55 |
| IPR003113 | 5 | 51 0 0   | 0 0 | 0 0 | 0 0 | 0 0 | 5 5 | 40.93 |
| IPR003132 | 5 | 85 5 5   | 0 0 | 0 0 | 0 0 | 0 0 | 0 0 | 60    |
| IPR003198 | 5 | 496 5 5  | 0 0 | 0 0 | 0 0 | 0 0 | 0 0 | 15.09 |
| IPR003314 | 5 | 69 5 5   | 0 0 | 0 0 | 0 0 | 0 0 | 0 0 | 21.02 |
| IPR003378 | 5 | 298 0 0  | 0 0 | 0 0 | 0 0 | 2 2 | 3 3 | 18.32 |
| IPR003386 | 5 | 259 1 1  | 0 0 | 5 5 | 0 0 | 0 0 | 0 0 | 15.3  |
| IPR003440 | 5 | 171 0 0  | 0 0 | 5 5 | 0 0 | 0 0 | 0 0 | 43.43 |
| IPR003466 | 5 | 117 1 1  | 0 0 | 2 2 | 0 0 | 2 2 | 0 0 | 14.89 |
| IPR003492 | 5 | 106 0 0  | 0 0 | 0 0 | 0 0 | 2 2 | 3 3 | 29.63 |
| IPR003497 | 5 | 228 5 5  | 0 0 | 0 0 | 0 0 | 0 0 | 0 0 | 23.5  |
| IPR003703 | 5 | 794 1 1  | 0 0 | 1 1 | 0 0 | 3 3 | 0 0 | 18.53 |
| IPR003723 | 5 | 253 6 6  | 0 0 | 0 0 | 0 0 | 0 0 | 0 0 | 22.75 |
| IPR003729 | 5 | 270 2 1  | 0 0 | 4 3 | 0 0 | 0 0 | 0 0 | 27.82 |
| IPR003806 | 5 | 370 5 5  | 0 0 | 0 0 | 0 0 | 0 0 | 0 0 | 11.57 |
| IPR003811 | 5 | 709 5 5  | 0 0 | 0 0 | 0 0 | 0 0 | 0 0 | 31.89 |
| IPR003827 | 5 | 88 0 0   | 0 0 | 4 2 | 3 1 | 0 0 | 0 0 | 24.93 |
| IPR003852 | 5 | 349 5 4  | 1 0 | 0 0 | 0 0 | 0 0 | 0 0 | 54.54 |
| IPR004028 | 5 | 7 1 1    | 0 0 | 0 0 | 0 0 | 0 0 | 5 5 | 39.58 |
| IPR004192 | 5 | 89 0 0   | 0 0 | 3 1 | 1 0 | 2 1 | 3 1 | 34.47 |
| IPR004218 | 5 | 402 5 5  | 0 0 | 0 0 | 0 0 | 0 0 | 0 0 | 38.11 |
| IPR004244 | 5 | 46 2 2   | 0 0 | 0 0 | 0 0 | 0 0 | 4 4 | 42.59 |
| IPR004328 | 5 | 261 0 0  | 0 0 | 0 0 | 0 0 | 1 1 | 4 4 | 12.04 |
| IPR004352 | 5 | 128 5 5  | 0 0 | 0 0 | 0 0 | 0 0 | 0 0 | 12.13 |
| IPR004700 | 5 | 431 1 0  | 1 0 | 5 4 | 0 0 | 0 0 | 0 0 | 26.61 |
| IPR004704 | 5 | 446 1 0  | 1 0 | 5 4 | 0 0 | 0 0 | 0 0 | 30.97 |
| IPR004854 | 5 | 146 0 0  | 0 0 | 3 3 | 0 0 | 0 0 | 0 0 | 44.69 |
| IPR004864 | 5 | 105 3 3  | 0 0 | 3 3 | 0 0 | 0 0 | 0 0 | 5.64  |
| IPR004899 | 5 | 263 5 5  | 0 0 | 0 0 | 0 0 | 0 0 | 0 0 | 24.59 |
| IPR004908 | 5 | 95 0 0   | 0 0 | 3 2 | 1 0 | 1 0 | 3 2 | 25.2  |
| IPR004954 | 5 | 81 5 5   | 0 0 | 0 0 | 0 0 | 0 0 | 0 0 | 20.34 |
| IPR004977 | 5 | 125 0 0  | 0 0 | 4 4 | 0 0 | 0 0 | 0 0 | 47.21 |
| IPR005016 | 5 | 166 0 0  | 0 0 | 0 0 | 0 0 | 1 1 | 1 1 | 28.03 |
| IPR005024 | 5 | 667 0 0  | 0 0 | 3 3 | 0 0 | 1 1 | 1 1 | 13    |
| IPR005039 | 5 | 171 5 5  | 0 0 | 0 0 | 0 0 | 0 0 | 0 0 | 15.04 |
| IPR005100 | 5 | 114 0 0  | 1 0 | 4 2 | 1 0 | 2 0 | 3 1 | 37    |
| IPR005118 | 5 | 764 4 1  | 0 0 | 4 1 | 0 0 | 0 0 | 0 0 | 24.28 |
| IPR005122 | 5 | 1827 3 3 | 0 0 | 0 0 | 0 0 | 1 1 | 1 1 | 14.49 |
| IPR005147 | 5 | 899 4 2  | 2 0 | 2 0 | 1 0 | 2 1 | 2 1 | 27.83 |
| IPR005161 | 5 | 140 0 0  | 0 0 | 4 0 | 1 0 | 4 0 | 5 1 | 12.91 |
| IPR005184 | 5 | 392 5 5  | 0 0 | 0 0 | 0 0 | 0 0 | 0 0 | 16.11 |
| IPR005190 | 5 | 779 5 4  | 0 0 | 0 0 | 0 0 | 0 0 | 1 0 | 23.9  |
| IPR005358 | 5 | 1020 4 4 | 0 0 | 1 1 | 0 0 | 0 0 | 0 0 | 27.65 |
| IPR005377 | 5 | 162 0 0  | 0 0 | 2 2 | 0 0 | 0 0 | 3 3 | 36.25 |
| IPR005524 | 5 | 582 4 3  | 2 1 | 0 0 | 0 0 | 0 0 | 0 0 | 16.78 |
| IPR005571 | 5 | 108 0 0  | 0 0 | 3 2 | 1 0 | 3 2 | 1 0 | 34    |
| IPR005616 | 5 | 373 5 5  | 0 0 | 0 0 | 0 0 | 0 0 | 0 0 | 29.68 |
| IPR005637 | 5 | 85 0 0   | 0 0 | 0 0 | 0 0 | 4 2 | 3 1 | 28.66 |
| IPR005651 | 5 | 522 2 2  | 1 1 | 1 1 | 0 0 | 1 1 | 0 0 | 31.83 |
| IPR005653 | 5 | 767 5 5  | 0 0 | 0 0 | 0 0 | 0 0 | 0 0 | 7.52  |
| IPR005798 | 5 | 1166 5 4 | 1 0 | 1 0 | 1 0 | 1 0 | 1 0 | 29.07 |
| IPR006114 | 5 | 804 3 2  | 1 0 | 1 0 | 1 0 | 1 0 | 3 2 | 39.91 |
| IPR006169 | 5 | 885 3 1  | 0 0 | 2 0 | 3 1 | 2 1 | 1 0 | 42.36 |
| IPR006199 | 5 | 626 5 5  | 0 0 | 0 0 | 0 0 | 0 0 | 0 0 | 32.67 |
| IPR006202 | 5 | 1087 1 0 | 0 0 | 1 0 | 0 0 | 0 0 | 5 4 | 19.64 |
| IPR006211 | 5 | 126 0 0  | 0 0 | 0 0 | 0 0 | 0 0 | 5 5 | 35.93 |
| IPR006573 | 5 | 212 1 1  | 0 0 | 0 0 | 0 0 | 0 0 | 4 4 | 28.2  |
| IPR006599 | 5 | 254 0 0  | 0 0 | 3 2 | 0 0 | 2 1 | 2 1 | 19.24 |
| IPR006622 | 5 | 121 3 1  | 2 0 | 0 0 | 1 0 | 0 0 | 3 2 | 38.9  |
| IPR006640 | 5 | 403 2 2  | 0 0 | 0 0 | 0 0 | 3 2 | 1 0 | 13.52 |
| IPR006692 | 5 | 191 0 0  | 0 0 | 3 0 | 3 0 | 5 2 | 3 0 | 30.34 |
| IPR006768 | 5 | 132 0 0  | 0 0 | 2 0 | 3 1 | 2 0 | 2 0 | 37.61 |
| IPR006855 | 5 | 93 3 0   | 0 0 | 0 0 | 0 0 | 5 2 | 1 0 | 26.43 |
| IPR006865 | 5 | 76 0 0   | 0 0 | 7 7 | 0 0 | 0 0 | 0 0 | 22.31 |
| IPR006900 | 5 | 348 0 0  | 0 0 | 4 0 | 4 0 | 5 1 | 4 0 | 14.89 |
| IPR006914 | 5 | 84 5 5   | 0 0 | 0 0 | 0 0 | 0 0 | 0 0 | 39.59 |
| IPR006948 | 5 | 43 0 0   | 0 0 | 5 5 | 0 0 | 0 0 | 0 0 | 50.56 |
| IPR007024 | 5 | 167 5 5  | 0 0 | 0 0 | 0 0 | 0 0 | 0 0 | 27.43 |
| IPR007052 | 5 | 19 0 0   | 0 0 | 1 1 | 1 1 | 0 0 | 4 4 | 13.36 |
| IPR007125 | 5 | 68 0 0   | 0 0 | 0 0 | 0 0 | 0 0 | 5 5 | 22.97 |
| IPR007185 | 5 | 251 0 0  | 1 1 | 4 2 | 0 0 | 1 0 | 2 0 | 13.99 |
| IPR007187 | 5 | 174 0 0  | 0 0 | 4 3 | 0 0 | 1 0 | 2 1 | 8.27  |
| IPR007212 | 5 | 38 1 1   | 4 4 | 0 0 | 0 0 | 0 0 | 0 0 | 34.3  |
| IPR007269 | 5 | 609 4 4  | 0 0 | 0 0 | 0 0 | 2 2 | 0 0 | 15.79 |
| IPR007273 | 5 | 148 0 0  | 0 0 | 4 4 | 0 0 | 0 0 | 1 1 | 33.57 |
| IPR007286 | 5 | 155 0 0  | 0 0 | 2 1 | 1 0 | 3 2 | 2 1 | 21.89 |
| IPR007380 | 5 | 67 5 4   | 1 0 | 0 0 | 0 0 | 0 0 | 0 0 | 35.59 |
| IPR007391 | 5 | 224 5 5  | 0 0 | 0 0 | 0 0 | 0 0 | 0 0 | 28.81 |
| IPR007474 | 5 | 370 0 0  | 0 0 | 3 2 | 0 0 | 0 0 | 3 2 | 40.96 |
| IPR007477 | 5 | 51 0 0   | 0 0 | 0 0 | 0 0 | 5 5 | 0 0 | 57.98 |
| IPR007528 | 5 | 81 0 0   | 0 0 | 4 4 | 0 0 | 1 1 | 0 0 | 20.33 |
| IPR007533 | 5 | 265 1 1  | 0 0 | 0 0 | 0 0 | 1 1 | 1 1 | 41.68 |
| IPR007591 | 5 | 69 0 0   | 0 0 | 4 3 | 0 0 | 2 1 | 0 0 | 40.87 |
| IPR007631 | 5 | 362 5 5  | 0 0 | 0 0 | 0 0 | 0 0 | 0 0 | 18.39 |
| IPR007632 | 5 | 201 0 0  | 0 0 | 0 0 | 0 0 | 1 1 | 3 3 | 24.41 |
| IPR007639 | 5 | 63 0 0   | 0 0 | 2 2 | 3 0 | 3 0 | 3 0 | 34.99 |
| IPR007700 | 5 | 77 0 0   | 0 0 | 5 5 | 0 0 | 0 0 | 0 0 | 42.36 |
| IPR007743 | 5 | 95 1 1   | 0 0 | 0 0 | 0 0 | 2 2 | 2 2 | 30.44 |
| IPR007803 | 5 | 231 3 3  | 0 0 | 0 0 | 0 0 | 0 0 | 2 2 | 21.77 |
| IPR007810 | 5 | 72 0 0   | 0 0 | 1 0 | 2 0 | 5 3 | 2 0 | 25.63 |
| IPR007813 | 5 | 361 3 3  | 0 0 | 2 2 | 0 0 | 0 0 | 0 0 | 8.22  |
| IPR007834 | 5 | 80 0 0   | 0 0 | 0 0 | 0 0 | 1 1 | 4 4 | 51.7  |
| IPR007877 | 5 | 111 0 0  | 0 0 | 5 5 | 0 0 | 0 0 | 0 0 | 48.42 |
| IPR007886 | 5 | 1000 2 1 | 1 0 | 4 1 | 2 0 | 3 0 | 3 0 | 30.12 |
| IPR007901 | 5 | 916 4 1  | 3 1 | 2 0 | 2 0 | 2 0 | 2 0 | 30.4  |
| IPR007930 | 5 | 44 0 0   | 0 0 | 5 5 | 0 0 | 0 0 | 0 0 | 22.93 |
| IPR007949 | 5 | 78 0 0   | 0 0 | 4 4 | 1 0 | 1 0 | 1 0 | 27.93 |
| IPR007963 | 5 | 209 5 4  | 2 1 | 0 0 | 0 0 | 0 0 | 0 0 | 34.85 |
| IPR007992 | 5 | 81 0 0   | 0 0 | 0 0 | 0 0 | 0 0 | 5 5 | 26.6  |
| IPR008037 | 5 | 23 0 0   | 0 0 | 0 0 | 0 0 | 0 0 | 5 5 | 42.6  |
| IPR008166 | 5 | 272 1 1  | 0 0 | 2 2 | 0 0 | 0 0 | 2 2 | 8.11  |
| IPR008172 | 5 | 710 2 1  | 1 0 | 2 2 | 0 0 | 1 1 | 0 0 | 8.76  |
| IPR008213 | 5 | 128 5 5  | 0 0 | 0 0 | 0 0 | 0 0 | 0 0 | 30.66 |
| IPR008251 | 5 | 70 0 0   | 0 0 | 0 0 | 0 0 | 1 0 | 5 4 | 26.49 |
| IPR008257 | 5 | 513 3 3  | 0 0 | 0 0 | 0 0 | 0 0 | 2 2 | 22.18 |
| IPR008379 | 5 | 80 0 0   | 0 0 | 0 0 | 0 0 | 0 0 | 5 5 | 61.94 |
| IPR008538 | 5 | 1226 5 5 | 0 0 | 0 0 | 0 0 | 0 0 | 0 0 | 12.66 |
| IPR008554 | 5 | 297 1 1  | 1 1 | 0 0 | 0 0 | 1 1 | 2 2 | 23.91 |
| IPR008598 | 5 | 121 0 0  | 0 0 | 0 0 | 0 0 | 0 0 | 5 5 | 25.53 |
| IPR008858 | 5 | 88 2 2   | 0 0 | 0 0 | 0 0 | 0 0 | 5 5 | 14.66 |
| IPR009215 | 5 | 89 3 3   | 0 0 | 2 2 | 0 0 | 0 0 | 0 0 | 59.26 |
| IPR009448 | 5 | 96 0 0   | 0 0 | 3 2 | 0 0 | 2 1 | 1 0 | 20.63 |
| IPR009454 | 5 | 32 0 0   | 0 0 | 0 0 | 0 0 | 0 0 | 7 7 | 30.7  |
| IPR009470 | 5 | 31 4 4   | 0 0 | 1 1 | 0 0 | 0 0 | 0 0 | 40.99 |
| IPR009471 | 5 | 25 0 0   | 0 0 | 0 0 | 0 0 | 0 0 | 5 5 | 51.25 |
| IPR009535 | 5 | 38 0 0   | 0 0 | 0 0 | 0 0 | 0 0 | 5 5 | 44.81 |
| IPR009537 | 5 | 72 4 2   | 3 1 | 0 0 | 0 0 | 0 0 | 0 0 | 29.21 |
| IPR009578 | 5 | 16 5 5   | 0 0 | 0 0 | 0 0 | 0 0 | 0 0 | 31.06 |
| IPR009628 | 5 | 116 4 4  | 0 0 | 2 2 | 0 0 | 0 0 | 0 0 | 27.75 |
| IPR009976 | 5 | 125 2 2  | 0 0 | 1 0 | 0 0 | 1 1 | 1 0 | 16.49 |
| IPR010292 | 5 | 224 0 0  | 0 0 | 5 5 | 0 0 | 0 0 | 0 0 | 41.92 |
| IPR010316 | 5 | 221 5 5  | 0 0 | 0 0 | 0 0 | 0 0 | 0 0 | 26.19 |
| IPR010399 | 5 | 157 0 0  | 0 0 | 5 5 | 0 0 | 0 0 | 0 0 | 39.19 |
| IPR010430 | 5 | 114 5 4  | 1 0 | 0 0 | 0 0 | 0 0 | 0 0 | 34.76 |
| IPR010457 | 5 | 53 0 0   | 0 0 | 0 0 | 0 0 | 0 0 | 6 6 | 23.16 |
| IPR010497 | 5 | 293 3 2  | 1 0 | 0 0 | 1 0 | 2 1 | 0 0 | 37.43 |
| IPR010511 | 5 | 206 5 5  | 0 0 | 0 0 | 0 0 | 0 0 | 0 0 | 15.39 |
| IPR010513 | 5 | 100 0 0  | 0 0 | 2 1 | 0 0 | 3 0 | 4 1 | 31.72 |
| IPR010547 | 5 | 35 5 5   | 0 0 | 0 0 | 0 0 | 0 0 | 0 0 | 26.93 |
| IPR010560 | 5 | 50 0 0   | 0 0 | 0 0 | 0 0 | 0 0 | 5 5 | 34.16 |
| IPR010621 | 5 | 316 4 3  | 1 0 | 2 1 | 0 0 | 1 0 | 0 0 | 26.45 |
| IPR010657 | 5 | 325 5 5  | 0 0 | 0 0 | 0 0 | 0 0 | 0 0 | 23.1  |
| IPR010675 | 5 | 80 0 0   | 0 0 | 1 0 | 0 0 | 2 0 | 5 3 | 41.97 |
| IPR010679 | 5 | 257 4 3  | 1 0 | 2 1 | 0 0 | 1 0 | 0 0 | 17.12 |
| IPR010703 | 5 | 224 0 0  | 0 0 | 0 0 | 0 0 | 1 0 | 5 4 | 14.84 |
| IPR010808 | 5 | 143 5 0  | 5 0 | 0 0 | 0 0 | 0 0 | 0 0 | 21.48 |
| IPR010814 | 5 | 45 5 5   | 0 0 | 0 0 | 0 0 | 0 0 | 0 0 | 51.43 |
| IPR010839 | 5 | 219 0 0  | 0 0 | 0 0 | 0 0 | 5 5 | 0 0 | 26.31 |
| IPR010895 | 5 | 267 5 5  | 0 0 | 0 0 | 0 0 | 0 0 | 1 1 | 16.23 |
| IPR010911 | 5 | 13 0 0   | 0 0 | 0 0 | 0 0 | 0 0 | 7 7 | 22.14 |
| IPR010940 | 5 | 88 5 3   | 0 0 | 2 0 |     |     |     |       |

|            |   |          |     |     |     |     |     |       |
|------------|---|----------|-----|-----|-----|-----|-----|-------|
| IPRO11114  | 5 | 715 5 4  | 1 0 | 0 0 | 0 0 | 0 0 | 0 0 | 26.85 |
| IPRO11118  | 5 | 184 3 3  | 0 0 | 0 0 | 0 0 | 1 1 | 0 0 | 22.73 |
| IPRO11125  | 5 | 636 5 2  | 3 0 | 0 0 | 0 0 | 0 0 | 0 0 | 44.48 |
| IPRO11417  | 5 | 130 0 0  | 0 0 | 1 1 | 0 0 | 2 1 | 0 0 | 11.64 |
| IPRO11422  | 5 | 78 0 0   | 0 0 | 3 1 | 0 0 | 2 0 | 4 2 | 32.57 |
| IPRO11464  | 5 | 16 5 5   | 0 0 | 0 0 | 0 0 | 0 0 | 0 0 | 24.05 |
| IPRO11478  | 5 | 36 5 5   | 0 0 | 0 0 | 0 0 | 0 0 | 0 0 | 18.69 |
| IPRO11500  | 5 | 217 0 0  | 0 0 | 0 0 | 0 0 | 0 0 | 5 5 | 34.49 |
| IPRO11513  | 5 | 70 0 0   | 0 0 | 1 0 | 0 0 | 2 1 | 3 2 | 20.74 |
| IPRO11515  | 5 | 66 0 0   | 0 0 | 1 1 | 0 0 | 4 0 | 4 3 | 47.42 |
| IPRO11524  | 5 | 77 0 0   | 0 0 | 0 0 | 0 0 | 1 0 | 5 5 | 30.04 |
| IPRO11602  | 5 | 174 0 0  | 0 0 | 1 0 | 2 2 | 0 0 | 1 0 | 34.91 |
| IPRO11640  | 5 | 595 5 2  | 3 0 | 0 0 | 0 0 | 0 0 | 0 0 | 29.42 |
| IPRO11666  | 5 | 63 0 0   | 0 0 | 1 1 | 1 1 | 3 2 | 1 0 | 55.57 |
| IPRO11703  | 5 | 757 1 1  | 0 0 | 2 0 | 0 0 | 0 0 | 4 2 | 55.32 |
| IPRO112131 | 5 | 767 2 2  | 0 0 | 0 0 | 0 0 | 3 3 | 0 0 | 38.63 |
| IPRO12135  | 5 | 1150 3 1 | 1 0 | 1 0 | 0 0 | 0 0 | 3 2 | 24.38 |
| IPRO12463  | 5 | 41 0 0   | 0 0 | 5 5 | 0 0 | 0 0 | 0 0 | 35.76 |
| IPRO12560  | 5 | 15 0 0   | 0 0 | 0 0 | 0 0 | 0 0 | 5 5 | 22.64 |
| IPRO12561  | 5 | 26 0 0   | 0 0 | 0 0 | 0 0 | 0 0 | 5 5 | 44.61 |
| IPRO12896  | 5 | 94 0 0   | 0 0 | 0 0 | 0 0 | 0 0 | 5 5 | 28.76 |
| IPRO12923  | 5 | 70 0 0   | 0 0 | 4 4 | 0 0 | 0 0 | 1 1 | 32.55 |
| IPRO12954  | 5 | 73 0 0   | 0 0 | 3 2 | 0 0 | 3 1 | 2 0 | 24.34 |
| IPRO12968  | 5 | 34 0 0   | 0 0 | 0 0 | 1 0 | 0 0 | 5 4 | 36.51 |
| IPRO12982  | 5 | 53 0 0   | 0 0 | 5 0 | 0 0 | 0 0 | 5 0 | 43.16 |
| IPRO12989  | 5 | 143 0 0  | 0 0 | 1 0 | 1 0 | 3 2 | 3 2 | 31.9  |
| IPRO12990  | 5 | 355 0 0  | 0 0 | 4 0 | 4 0 | 4 0 | 4 0 | 19.72 |
| IPRO13011  | 5 | 62 5 5   | 0 0 | 0 0 | 0 0 | 0 0 | 0 0 | 20.18 |
| IPRO13025  | 5 | 996 0 0  | 0 0 | 5 4 | 1 0 | 1 0 | 2 1 | 31.05 |
| IPRO13029  | 5 | 869 1 0  | 0 0 | 3 2 | 1 0 | 1 0 | 3 2 | 59.09 |
| IPRO13092  | 5 | 171 0 0  | 0 0 | 0 0 | 0 0 | 0 0 | 5 5 | 52.55 |
| IPRO13097  | 5 | 397 2 2  | 0 0 | 1 1 | 0 0 | 2 2 | 0 0 | 13.07 |
| IPRO13117  | 5 | 11 5 5   | 0 0 | 0 0 | 0 0 | 0 0 | 0 0 | 55.42 |
| IPRO13131  | 5 | 648 5 4  | 0 0 | 0 0 | 0 0 | 1 0 | 0 0 | 20.94 |
| IPRO13173  | 5 | 265 5 5  | 0 0 | 0 0 | 0 0 | 0 0 | 0 0 | 13.59 |
| IPRO13190  | 5 | 15 5 5   | 0 0 | 0 0 | 0 0 | 0 0 | 0 0 | 47.26 |
| IPRO13191  | 5 | 16 5 5   | 0 0 | 0 0 | 0 0 | 0 0 | 0 0 | 43.15 |
| IPRO13197  | 5 | 67 3 3   | 0 0 | 1 0 | 0 0 | 2 1 | 0 0 | 23.62 |
| IPRO13201  | 5 | 763 0 0  | 0 0 | 3 2 | 2 1 | 0 0 | 3 2 | 25.41 |
| IPRO13223  | 5 | 259 5 5  | 0 0 | 0 0 | 0 0 | 0 0 | 0 0 | 20.36 |
| IPRO13230  | 5 | 117 5 5  | 0 0 | 0 0 | 0 0 | 0 0 | 0 0 | 19.21 |
| IPRO13272  | 5 | 129 0 0  | 0 0 | 4 3 | 1 0 | 1 0 | 2 1 | 43.66 |
| IPRO13341  | 5 | 1523 5 5 | 1 0 | 1 0 | 0 0 | 1 0 | 1 0 | 16.57 |
| IPRO13535  | 5 | 93 0 0   | 0 0 | 3 0 | 3 0 | 5 2 | 3 0 | 14.72 |
| IPRO13536  | 5 | 85 0 0   | 0 0 | 2 1 | 0 0 | 4 3 | 0 0 | 29.64 |
| IPRO13549  | 5 | 459 4 3  | 0 0 | 2 1 | 0 0 | 0 0 | 1 0 | 34.19 |
| IPRO13557  | 5 | 92 5 5   | 0 0 | 0 0 | 0 0 | 0 0 | 0 0 | 39.52 |
| IPRO13575  | 5 | 304 5 5  | 0 0 | 0 0 | 0 0 | 0 0 | 0 0 | 38.27 |
| IPRO13577  | 5 | 70 0 0   | 0 0 | 0 0 | 0 0 | 0 0 | 5 5 | 38.19 |
| IPRO13580  | 5 | 122 5 4  | 0 0 | 1 0 | 0 0 | 0 0 | 0 0 | 41.96 |
| IPRO13601  | 5 | 237 2 0  | 0 0 | 5 3 | 0 0 | 0 0 | 0 0 | 40.19 |
| IPRO13609  | 5 | 102 6 6  | 0 0 | 0 0 | 0 0 | 0 0 | 0 0 | 61.68 |
| IPRO13623  | 5 | 64 0 0   | 0 0 | 5 5 | 0 0 | 0 0 | 0 0 | 50.92 |
| IPRO13657  | 5 | 354 0 0  | 0 0 | 2 1 | 0 0 | 1 0 | 3 3 | 10.77 |
| IPRO13678  | 5 | 105 5 5  | 0 0 | 0 0 | 0 0 | 0 0 | 0 0 | 52.17 |
| IPRO13685  | 5 | 650 5 5  | 0 0 | 0 0 | 0 0 | 0 0 | 0 0 | 16.71 |
| IPRO13699  | 5 | 73 0 0   | 0 0 | 2 2 | 0 0 | 0 0 | 3 3 | 38.42 |
| IPRO13719  | 5 | 111 0 0  | 0 0 | 3 1 | 4 2 | 2 0 | 2 0 | 30.95 |
| IPRO13724  | 5 | 133 0 0  | 0 0 | 0 0 | 0 0 | 2 2 | 3 3 | 40.82 |
| IPRO13799  | 5 | 123 0 0  | 0 0 | 0 0 | 0 0 | 0 0 | 5 5 | 36.57 |
| IPRO13800  | 5 | 135 0 0  | 0 0 | 0 0 | 0 0 | 0 0 | 5 5 | 25.53 |
| IPRO13801  | 5 | 134 0 0  | 0 0 | 0 0 | 0 0 | 0 0 | 5 5 | 43    |
| IPRO13809  | 5 | 338 0 0  | 0 0 | 1 1 | 0 0 | 3 1 | 5 3 | 21.18 |
| IPRO13819  | 5 | 258 3 2  | 0 0 | 1 0 | 0 0 | 0 0 | 3 2 | 27.15 |
| IPRO13860  | 5 | 105 0 0  | 0 0 | 0 0 | 0 0 | 5 5 | 0 0 | 41.49 |
| IPRO13866  | 5 | 78 1 0   | 0 0 | 1 0 | 1 0 | 1 0 | 4 3 | 54.62 |
| IPRO13915  | 5 | 83 0 0   | 0 0 | 4 1 | 3 0 | 4 1 | 3 0 | 60.86 |
| IPRO13938  | 5 | 4 0 0    | 0 0 | 0 0 | 0 0 | 0 0 | 5 5 | 65.46 |
| IPRO14767  | 5 | 70 0 0   | 0 0 | 0 0 | 0 0 | 4 1 | 4 1 | 25.23 |
| IPRO14773  | 5 | 19 5 5   | 0 0 | 0 0 | 0 0 | 0 0 | 0 0 | 50.84 |
| IPRO14811  | 5 | 272 0 0  | 0 0 | 5 3 | 0 0 | 2 0 | 2 0 | 26.27 |
| IPRO14812  | 5 | 247 0 0  | 0 0 | 1 1 | 0 0 | 1 1 | 3 3 | 13.24 |
| IPRO14824  | 5 | 273 5 4  | 0 0 | 1 0 | 1 0 | 1 0 | 1 0 | 35.52 |
| IPRO14851  | 5 | 147 1 0  | 0 0 | 0 0 | 1 0 | 4 2 | 3 1 | 19.11 |
| IPRO14883  | 5 | 225 3 3  | 0 0 | 2 1 | 0 0 | 0 0 | 1 0 | 13.62 |
| IPRO14887  | 5 | 30 0 0   | 0 0 | 0 0 | 0 0 | 0 0 | 5 5 | 69.93 |
| IPRO14891  | 5 | 107 0 0  | 0 0 | 1 0 | 1 0 | 4 2 | 3 1 | 45.48 |
| IPRO14898  | 5 | 69 0 0   | 0 0 | 2 2 | 0 0 | 2 2 | 1 1 | 55.89 |
| IPRO14914  | 5 | 372 5 5  | 0 0 | 0 0 | 0 0 | 0 0 | 0 0 | 6.47  |
| IPRO15009  | 5 | 47 0 0   | 0 0 | 0 0 | 0 0 | 0 0 | 5 5 | 35.06 |
| IPRO15020  | 5 | 67 5 5   | 0 0 | 0 0 | 0 0 | 0 0 | 0 0 | 23    |
| IPRO15049  | 5 | 186 0 0  | 0 0 | 0 0 | 3 0 | 3 0 | 3 0 | 41.63 |
| IPRO15162  | 5 | 97 4 3   | 0 0 | 2 1 | 0 0 | 0 0 | 0 0 | 47.21 |
| IPRO15195  | 5 | 89 0 0   | 0 0 | 4 0 | 2 0 | 4 0 | 4 0 | 51.94 |
| IPRO15224  | 5 | 31 0 0   | 0 0 | 0 0 | 0 0 | 0 0 | 0 0 | 53.08 |
| IPRO15240  | 5 | 299 2 2  | 0 0 | 3 3 | 0 0 | 0 0 | 0 0 | 23.47 |
| IPRO15269  | 5 | 413 1 0  | 1 0 | 5 4 | 0 0 | 0 0 | 0 0 | 12.83 |
| IPRO15273  | 5 | 763 5 4  | 1 0 | 1 0 | 0 0 | 1 0 | 1 0 | 25.02 |
| IPRO15321  | 5 | 95 0 0   | 0 0 | 0 0 | 0 0 | 0 0 | 5 5 | 16.08 |
| IPRO15358  | 5 | 56 5 5   | 0 0 | 0 0 | 0 0 | 0 0 | 0 0 | 13.37 |
| IPRO15366  | 5 | 287 5 3  | 2 0 | 2 0 | 0 0 | 1 1 | 2 0 | 14.68 |
| IPRO15376  | 5 | 326 3 1  | 2 0 | 3 1 | 0 0 | 2 0 | 3 1 | 26.67 |
| IPRO15967  | 5 | 724 5 4  | 0 0 | 0 0 | 0 0 | 0 0 | 1 0 | 33.24 |
| IPRO16034  | 5 | 140 0 0  | 0 0 | 1 1 | 0 0 | 2 0 | 4 2 | 43.35 |
| IPRO16477  | 5 | 324 2 2  | 0 0 | 0 0 | 0 0 | 3 3 | 0 0 | 23.7  |
| IPRO17748  | 5 | 98 5 5   | 0 0 | 0 0 | 0 0 | 0 0 | 0 0 | 17.96 |
| IPRO17801  | 5 | 44 5 5   | 0 0 | 0 0 | 0 0 | 0 0 | 0 0 | 25.59 |
| IPRO18020  | 5 | 246 5 4  | 0 0 | 1 0 | 0 0 | 0 0 | 0 0 | 22.12 |
| IPRO18027  | 5 | 775 4 2  | 3 1 | 3 1 | 1 0 | 2 0 | 2 0 | 30.01 |
| IPRO18113  | 5 | 1409 6 6 | 0 0 | 0 0 | 0 0 | 0 0 | 0 0 | 43.85 |
| IPRO18144  | 5 | 62 0 0   | 0 0 | 4 4 | 1 1 | 0 0 | 0 0 | 32.9  |
| IPRO18145  | 5 | 339 5 5  | 0 0 | 0 0 | 0 0 | 0 0 | 0 0 | 16.42 |
| IPRO18169  | 5 | 476 0 0  | 0 0 | 5 5 | 0 0 | 0 0 | 0 0 | 20.09 |
| IPRO18389  | 5 | 1197 5 5 | 0 0 | 0 0 | 0 0 | 0 0 | 0 0 | 13.01 |
| IPRO18449  | 5 | 653 5 4  | 1 0 | 0 0 | 0 0 | 0 0 | 0 0 | 17.52 |
| IPRO18499  | 5 | 1209 0 0 | 0 0 | 1 0 | 1 0 | 0 0 | 4 3 | 11.49 |
| IPRO18502  | 5 | 1671 0 0 | 0 0 | 2 2 | 0 0 | 2 2 | 0 0 | 21.24 |
| IPRO18538  | 5 | 139 0 0  | 0 0 | 5 1 | 0 0 | 0 0 | 0 0 | 8.45  |
| IPRO18584  | 5 | 433 5 5  | 0 0 | 0 0 | 0 0 | 0 0 | 0 0 | 4.11  |
| IPRO18656  | 5 | 114 5 5  | 0 0 | 0 0 | 0 0 | 0 0 | 0 0 | 32.36 |
| IPRO18660  | 5 | 226 5 5  | 0 0 | 0 0 | 0 0 | 0 0 | 0 0 | 16.33 |
| IPRO18708  | 5 | 72 5 5   | 0 0 | 0 0 | 0 0 | 0 0 | 0 0 | 18.96 |
| IPRO18838  | 5 | 63 0 0   | 0 0 | 0 0 | 1 1 | 2 2 | 0 0 | 25.59 |
| IPRO18848  | 5 | 27 0 0   | 0 0 | 5 5 | 0 0 | 0 0 | 0 0 | 36.06 |
| IPRO18877  | 5 | 27 5 5   | 0 0 | 0 0 | 0 0 | 0 0 | 0 0 | 27.81 |
| IPRO18878  | 5 | 41 5 5   | 0 0 | 0 0 | 0 0 | 0 0 | 0 0 | 16.77 |
| IPRO18931  | 5 | 186 5 5  | 0 0 | 0 0 | 0 0 | 0 0 | 0 0 | 24.14 |
| IPRO18961  | 5 | 223 2 2  | 0 0 | 1 1 | 0 0 | 0 0 | 2 2 | 26.25 |
| IPRO18974  | 5 | 542 4 1  | 2 0 | 2 0 | 1 0 | 4 1 | 4 1 | 41.71 |
| IPRO19041  | 5 | 39 0 0   | 0 0 | 0 0 | 0 0 | 0 0 | 6 6 | 61.04 |
| IPRO19050  | 5 | 121 0 0  | 0 0 | 1 0 | 1 0 | 4 2 | 3 1 | 38.78 |
| IPRO19175  | 5 | 72 0 0   | 0 0 | 5 3 | 2 0 | 2 0 | 2 0 | 45.38 |
| IPRO19247  | 5 | 97 5 5   | 0 0 | 0 0 | 0 0 | 0 0 | 0 0 | 48.68 |
| IPRO19293  | 5 | 91 3 0   | 5 2 | 0 0 | 0 0 | 0 0 | 0 0 | 22.69 |
| IPRO19302  | 5 | 67 4 4   | 1 1 | 0 0 | 0 0 | 0 0 | 0 0 | 27.16 |
| IPRO19480  | 5 | 499 5 3  | 2 0 | 0 0 | 0 0 | 0 0 | 0 0 | 39.65 |
| IPRO19483  | 5 | 91 0 0   | 0 0 | 2 0 | 1 0 | 2 0 | 4 1 | 43.52 |
| IPRO19515  | 5 | 108 0 0  | 0 0 | 4 2 | 1 0 | 2 1 | 2 0 | 16.53 |
| IPRO19555  | 5 | 23 0 0   | 0 0 | 0 0 | 0 0 | 0 0 | 5 5 | 48.69 |
| IPRO19570  | 5 | 168 0 0  | 0 0 | 0 0 | 0 0 | 0 0 | 5 5 | 53.9  |
| IPRO19632  | 5 | 1148 4 3 | 1 0 | 2 1 | 1 0 | 2 1 | 1 0 | 39.83 |
| IPRO20189  | 5 | 179 0 0  | 1 0 | 4 3 | 2 0 | 1 0 | 2 1 | 33.12 |
| IPRO20336  | 5 | 37 5 5   | 0 0 | 0 0 | 0 0 | 0 0 | 0 0 | 29.49 |
| IPRO20580  | 5 | 1272 4 3 | 0 0 | 0 0 | 0 0 | 0 0 | 2 1 | 27.81 |
| IPRO20598  | 5 | 960 3 3  | 0 0 | 1 1 | 0 0 | 0 0 | 1 1 | 32.47 |
| IPRO20602  | 5 | 1300 2 2 | 0 0 | 0 0 | 0 0 | 3 3 | 0 0 | 26.9  |
| IPRO20631  | 5 | 1006 2 1 | 1 0 | 3 2 | 1 0 | 1 0 | 2 0 | 45.24 |
| IPRO20822  | 5 | 83 5 5   | 0 0 | 0 0 | 0 0 | 0 0 | 0 0 | 19.28 |
| IPRO20840  | 5 | 648 5 5  | 1 1 | 0 0 | 0 0 | 0 0 | 0 0 | 33.5  |
| IPRO21006  | 5 | 33 0 0   | 0 0 | 0 0 | 0 0 | 5 5 | 0 0 | 22.08 |
| IPRO21074  | 5 | 84 5 5   | 0 0 | 0 0 | 0 0 | 0 0 | 0 0 | 45.22 |
| IPRO21131  | 5 | 1091 1 1 | 0 0 | 2 2 | 0 0 | 0 0 | 1 1 | 28.35 |
| IPRO21134  | 5 | 186 1 1  | 0 0 | 0 0 | 0 0 | 2 2 | 0 0 | 17.09 |
| IPRO21219  | 5 | 26 4 4   | 1 1 | 0 0 | 0 0 | 0 0 | 0 0 | 28.06 |
| IPRO21419  | 5 | 43 0 0   | 0 0 | 2 1 | 0 0 | 0 0 | 4 3 | 38.16 |
| IPRO21478  | 5 | 71 5 5   | 0 0 | 0 0 | 0 0 | 0 0 | 0 0 | 25.29 |
| IPRO21520  | 5 | 27 1 1   | 0 0 | 0 0 | 0 0 | 0 0 | 4 4 | 52.98 |

|                |   |          |     |     |     |     |     |       |
|----------------|---|----------|-----|-----|-----|-----|-----|-------|
| IPRO21537      | 5 | 40 0 0   | 0 0 | 0 0 | 0 0 | 0 0 | 5 5 | 59.67 |
| IPRO21652      | 5 | 165 5 5  | 0 0 | 0 0 | 0 0 | 0 0 | 0 0 | 8.39  |
| IPRO21661      | 5 | 22 0 0   | 0 0 | 0 0 | 0 0 | 5 5 | 0 0 | 43.52 |
| IPRO21807      | 5 | 150 1 0  | 0 0 | 5 4 | 0 0 | 0 0 | 0 0 | 22.05 |
| IPRO21817      | 5 | 62 5 4   | 0 0 | 1 0 | 0 0 | 0 0 | 0 0 | 71.56 |
| IPRO21846      | 5 | 68 0 0   | 0 0 | 3 1 | 2 0 | 3 1 | 3 1 | 35.52 |
| IPRO21852      | 5 | 107 0 0  | 0 0 | 0 0 | 0 0 | 0 0 | 4 4 | 25.4  |
| IPRO21868      | 5 | 6 6 6    | 0 0 | 0 0 | 0 0 | 0 0 | 0 0 | 19.02 |
| IPRO21869      | 5 | 113 1 1  | 0 0 | 0 0 | 2 2 | 0 0 | 2 2 | 27.05 |
| IPRO21884      | 5 | 45 4 4   | 1 1 | 0 0 | 0 0 | 0 0 | 0 0 | 31.51 |
| IPRO21893      | 5 | 66 0 0   | 0 0 | 0 0 | 0 0 | 0 0 | 5 5 | 37.39 |
| IPRO21896      | 5 | 37 0 0   | 0 0 | 0 0 | 0 0 | 0 0 | 5 5 | 57.95 |
| IPRO21978      | 5 | 18 0 0   | 0 0 | 0 0 | 0 0 | 0 0 | 5 5 | 84.82 |
| IPRO21991      | 5 | 24 0 0   | 0 0 | 0 0 | 0 0 | 0 0 | 5 5 | 59.94 |
| IPRO22029      | 5 | 268 5 5  | 0 0 | 0 0 | 0 0 | 0 0 | 0 0 | 4.55  |
| IPRO22039      | 5 | 30 0 0   | 0 0 | 0 0 | 2 0 | 5 3 | 0 0 | 30.55 |
| IPRO22040      | 5 | 27 0 0   | 0 0 | 0 0 | 2 0 | 5 3 | 0 0 | 40.9  |
| IPRO22052      | 5 | 218 0 0  | 0 0 | 2 0 | 2 0 | 3 1 | 4 2 | 33.12 |
| IPRO22081      | 5 | 23 1 1   | 0 0 | 0 0 | 0 0 | 0 0 | 4 4 | 24.96 |
| IPRO22153      | 5 | 75 5 5   | 0 0 | 0 0 | 0 0 | 0 0 | 0 0 | 58.15 |
| IPRO22265      | 5 | 197 0 0  | 0 0 | 3 1 | 2 0 | 3 1 | 3 0 | 13.97 |
| IPRO22412      | 5 | 831 3 2  | 3 2 | 1 0 | 0 0 | 1 0 | 1 0 | 22.34 |
| PF00504        | 5 | 527 0 0  | 0 0 | 5 5 | 0 0 | 0 0 | 0 0 | 21.83 |
| PF01930        | 5 | 357 4 2  | 2 0 | 0 0 | 0 0 | 0 0 | 1 1 | 12.92 |
| PF02709        | 5 | 176 1 1  | 0 0 | 0 0 | 0 0 | 0 0 | 3 3 | 33.15 |
| PF03693        | 5 | 225 6 6  | 0 0 | 0 0 | 0 0 | 0 0 | 0 0 | 23.17 |
| PF04331        | 5 | 15 5 5   | 0 0 | 0 0 | 0 0 | 0 0 | 3 1 | 22.92 |
| PF05402        | 5 | 221 4 4  | 1 1 | 0 0 | 0 0 | 0 0 | 0 0 | 16.2  |
| PF05756        | 5 | 20 1 1   | 0 0 | 0 0 | 2 2 | 0 0 | 2 2 | 16.48 |
| PF07019        | 5 | 76 0 0   | 0 0 | 4 4 | 0 0 | 0 0 | 0 0 | 25.85 |
| PF07253        | 5 | 84 0 0   | 0 0 | 0 0 | 0 0 | 0 0 | 4 4 | 13.65 |
| PF08236        | 5 | 31 0 0   | 0 0 | 0 0 | 5 1 | 4 0 | 0 0 | 31.61 |
| PF08488        | 5 | 60 0 0   | 0 0 | 5 5 | 0 0 | 0 0 | 0 0 | 22.72 |
| PF08703        | 5 | 35 0 0   | 0 0 | 0 0 | 0 0 | 0 0 | 5 5 | 29.29 |
| PF08754        | 5 | 31 5 5   | 0 0 | 0 0 | 0 0 | 0 0 | 0 0 | 18.78 |
| PF09237        | 5 | 29 0 0   | 0 0 | 0 0 | 0 0 | 1 0 | 5 4 | 58.89 |
| PF09884        | 5 | 196 4 4  | 0 0 | 1 1 | 0 0 | 0 0 | 0 0 | 16.3  |
| PF10344        | 5 | 57 0 0   | 0 0 | 1 0 | 3 0 | 5 2 | 0 0 | 16.33 |
| PF10388        | 5 | 52 5 5   | 0 0 | 0 0 | 0 0 | 0 0 | 0 0 | 25.4  |
| PF10881        | 5 | 146 5 5  | 0 0 | 0 0 | 0 0 | 0 0 | 0 0 | 11.57 |
| PF11130        | 5 | 140 5 5  | 0 0 | 0 0 | 0 0 | 0 0 | 0 0 | 13.43 |
| PF11412        | 5 | 314 5 5  | 0 0 | 0 0 | 0 0 | 0 0 | 0 0 | 25.31 |
| PF11429        | 5 | 7 5 5    | 0 0 | 0 0 | 0 0 | 0 0 | 0 0 | 37.2  |
| PF11717        | 5 | 125 0 0  | 0 0 | 1 0 | 1 0 | 6 4 | 0 0 | 26.64 |
| PF11852        | 5 | 59 5 2   | 0 0 | 3 0 | 0 0 | 0 0 | 0 0 | 30.66 |
| PF11931        | 5 | 78 0 0   | 0 0 | 1 0 | 1 0 | 5 4 | 1 0 | 53.05 |
| PF11934        | 5 | 73 0 0   | 0 0 | 2 0 | 0 0 | 0 0 | 5 3 | 26.15 |
| PF11976        | 5 | 103 0 0  | 0 0 | 4 3 | 0 0 | 1 1 | 2 1 | 17.04 |
| PF12013        | 5 | 106 0 0  | 0 0 | 0 0 | 0 0 | 5 5 | 0 0 | 23.48 |
| PF12074        | 5 | 52 0 0   | 0 0 | 0 0 | 0 0 | 3 1 | 0 0 | 14.01 |
| PF12130        | 5 | 95 0 0   | 0 0 | 0 0 | 0 0 | 0 0 | 5 5 | 27.4  |
| PF12142        | 5 | 53 1 0   | 0 0 | 5 4 | 0 0 | 0 0 | 0 0 | 48.8  |
| PF12303        | 5 | 141 6 6  | 0 0 | 1 1 | 0 0 | 0 0 | 0 0 | 29.99 |
| PF12436        | 5 | 82 0 0   | 0 0 | 4 2 | 1 0 | 3 1 | 2 0 | 45.78 |
| PF12451        | 5 | 46 0 0   | 0 0 | 1 0 | 2 1 | 4 2 | 2 0 | 38.82 |
| PS50850        | 5 | 85 3 2   | 0 0 | 3 2 | 0 0 | 1 1 | 0 0 | 3.59  |
| PTHR10199      | 5 | 11 5 5   | 0 0 | 0 0 | 0 0 | 0 0 | 0 0 | 52.92 |
| PTHR10799      | 5 | 25 1 1   | 0 0 | 4 3 | 0 0 | 0 0 | 1 0 | 6.53  |
| PTHR10849      | 5 | 46 5 3   | 2 0 | 0 0 | 0 0 | 0 0 | 1 0 | 30.75 |
| PTHR11412      | 5 | 30 5 5   | 0 0 | 0 0 | 0 0 | 0 0 | 0 0 | 26.93 |
| PTHR11614      | 5 | 123 5 5  | 0 0 | 0 0 | 0 0 | 0 0 | 0 0 | 13.4  |
| PTHR11615      | 5 | 14 0 0   | 3 3 | 1 1 | 0 0 | 0 0 | 0 0 | 23.85 |
| PTHR11945      | 5 | 10 0 0   | 0 0 | 5 5 | 0 0 | 0 0 | 0 0 | 33.97 |
| PTHR12326      | 5 | 61 0 0   | 0 0 | 1 1 | 0 0 | 0 0 | 4 4 | 27.92 |
| PTHR13572      | 5 | 31 2 2   | 0 0 | 0 0 | 0 0 | 0 0 | 3 3 | 35.49 |
| PTHR14596      | 5 | 133 0 0  | 1 0 | 0 0 | 0 0 | 3 2 | 3 2 | 17.55 |
| PTHR18359      | 5 | 23 2 2   | 0 0 | 0 0 | 0 0 | 2 0 | 0 0 | 26.73 |
| PTHR19328-SF6  | 5 | 17 5 5   | 0 0 | 0 0 | 0 0 | 0 0 | 0 0 | 31.93 |
| PTHR21089      | 5 | 125 4 2  | 0 0 | 0 0 | 0 0 | 3 1 | 0 0 | 26.06 |
| PTHR22847      | 5 | 31 5 4   | 0 0 | 0 0 | 1 0 | 1 0 | 0 0 | 4.56  |
| PTHR22939-SF10 | 5 | 29 3 3   | 0 0 | 2 2 | 0 0 | 0 0 | 0 0 | 12.16 |
| PTHR22954      | 5 | 131 0 0  | 0 0 | 0 0 | 0 0 | 0 0 | 5 5 | 24.96 |
| PTHR22980      | 5 | 10 5 5   | 0 0 | 0 0 | 0 0 | 0 0 | 0 0 | 16.39 |
| PTHR23036      | 5 | 36 0 0   | 0 0 | 0 0 | 0 0 | 0 0 | 5 5 | 23.1  |
| PTHR23083-SF14 | 5 | 26 5 5   | 0 0 | 0 0 | 0 0 | 0 0 | 0 0 | 12.24 |
| PTHR23155-SF21 | 5 | 54 0 0   | 0 0 | 5 5 | 0 0 | 0 0 | 0 0 | 24.13 |
| PTHR23172      | 5 | 33 0 0   | 0 0 | 1 1 | 0 0 | 4 4 | 0 0 | 47.05 |
| PTHR23172-SF19 | 5 | 16 0 0   | 0 0 | 0 0 | 0 0 | 5 5 | 0 0 | 30.2  |
| PTHR23225      | 5 | 46 0 0   | 0 0 | 0 0 | 0 0 | 1 0 | 4 3 | 16.49 |
| PTHR23228      | 5 | 32 1 1   | 0 0 | 0 0 | 0 0 | 1 0 | 4 3 | 19.41 |
| SMO0837        | 5 | 291 0 0  | 0 0 | 5 5 | 0 0 | 0 0 | 0 0 | 49.63 |
| TIGR01045      | 5 | 38 5 5   | 0 0 | 0 0 | 0 0 | 0 0 | 0 0 | 61    |
| TIGR01643      | 5 | 19 4 4   | 0 0 | 0 0 | 0 0 | 0 0 | 2 2 | 13.1  |
| TIGR01731      | 5 | 42 5 5   | 0 0 | 0 0 | 0 0 | 0 0 | 0 0 | 23.29 |
| TIGR01764      | 5 | 366 6 6  | 0 0 | 0 0 | 0 0 | 0 0 | 0 0 | 23.71 |
| TIGR02098      | 5 | 62 5 5   | 0 0 | 0 0 | 0 0 | 0 0 | 0 0 | 38.73 |
| TIGR02913      | 5 | 90 5 5   | 0 0 | 0 0 | 0 0 | 0 0 | 0 0 | 36.87 |
| TIGR03505      | 5 | 115 5 5  | 0 0 | 0 0 | 0 0 | 0 0 | 0 0 | 32.76 |
| IPRO00056      | 6 | 997 1 1  | 1 1 | 4 4 | 0 0 | 0 0 | 0 0 | 44.16 |
| IPRO00083      | 6 | 328 0 0  | 0 0 | 0 0 | 0 0 | 0 0 | 6 6 | 35.66 |
| IPRO00092      | 6 | 2031 2 2 | 1 1 | 1 1 | 1 1 | 1 1 | 0 0 | 25.04 |
| IPRO00368      | 6 | 160 2 0  | 0 0 | 6 4 | 0 0 | 0 0 | 0 0 | 35.29 |
| IPRO00494      | 6 | 455 0 0  | 0 0 | 0 0 | 0 0 | 0 0 | 6 6 | 16.16 |
| IPRO00627      | 6 | 663 6 5  | 0 0 | 0 0 | 0 0 | 1 0 | 0 0 | 22.56 |
| IPRO00890      | 6 | 954 6 6  | 0 0 | 0 0 | 0 0 | 0 0 | 0 0 | 33.54 |
| IPRO00897      | 6 | 107 5 5  | 0 0 | 5 2 | 0 0 | 3 1 | 2 0 | 22.3  |
| IPRO00911      | 6 | 988 0 0  | 0 0 | 1 1 | 0 0 | 5 5 | 0 0 | 47.49 |
| IPRO01037      | 6 | 16 0 0   | 0 0 | 0 0 | 0 0 | 0 0 | 7 7 | 58.81 |
| IPRO01085      | 6 | 1130 2 2 | 0 0 | 4 4 | 0 0 | 0 0 | 0 0 | 51.39 |
| IPRO01086      | 6 | 803 5 4  | 1 0 | 2 1 | 0 0 | 1 0 | 0 0 | 27.31 |
| IPRO01101      | 6 | 603 0 0  | 0 0 | 0 0 | 0 0 | 0 0 | 6 6 | 19.39 |
| IPRO01134      | 6 | 7 0 0    | 0 0 | 0 0 | 0 0 | 0 0 | 6 6 | 13.74 |
| IPRO01148      | 6 | 624 2 2  | 0 0 | 1 1 | 0 0 | 0 0 | 3 3 | 23.71 |
| IPRO01207      | 6 | 998 4 4  | 0 0 | 2 2 | 0 0 | 0 0 | 0 0 | 16.02 |
| IPRO01268      | 6 | 917 4 1  | 3 0 | 1 0 | 0 0 | 1 1 | 1 1 | 28.26 |
| IPRO01365      | 6 | 868 1 1  | 0 0 | 1 1 | 0 0 | 2 2 | 1 1 | 16.36 |
| IPRO01382      | 6 | 432 1 1  | 0 0 | 0 0 | 0 0 | 2 1 | 4 3 | 25.78 |
| IPRO01398      | 6 | 164 0 0  | 0 0 | 0 0 | 5 5 | 1 1 | 0 0 | 24.25 |
| IPRO01516      | 6 | 1624 6 3 | 1 0 | 3 0 | 0 0 | 0 0 | 2 0 | 28.42 |
| IPRO01529      | 6 | 202 4 4  | 1 0 | 1 0 | 1 0 | 1 0 | 2 1 | 27.55 |
| IPRO01567      | 6 | 1338 3 2 | 1 0 | 2 2 | 2 2 | 0 0 | 0 0 | 16.01 |
| IPRO01576      | 6 | 981 1 1  | 0 0 | 2 2 | 2 2 | 0 0 | 0 0 | 43.89 |
| IPRO01580      | 6 | 245 0 0  | 0 0 | 3 3 | 0 0 | 4 4 | 0 0 | 37.35 |
| IPRO01675      | 6 | 330 0 0  | 0 0 | 0 0 | 0 0 | 0 0 | 6 6 | 14.98 |
| IPRO01747      | 6 | 130 0 0  | 0 0 | 0 0 | 0 0 | 0 0 | 9 9 | 9.45  |
| IPRO01767      | 6 | 5 3 3    | 0 0 | 0 0 | 0 0 | 0 0 | 3 3 | 19.44 |
| IPRO01852      | 6 | 339 5 3  | 3 1 | 1 1 | 0 0 | 0 0 | 0 0 | 63.1  |
| IPRO01888      | 6 | 24 0 0   | 0 0 | 0 0 | 0 0 | 0 0 | 5 5 | 36.59 |
| IPRO02013      | 6 | 341 0 0  | 0 0 | 1 1 | 1 0 | 3 1 | 4 2 | 25.33 |
| IPRO02058      | 6 | 298 0 0  | 0 0 | 1 0 | 1 0 | 6 5 | 0 0 | 29.25 |
| IPRO02093      | 6 | 131 1 1  | 0 0 | 2 0 | 0 0 | 0 0 | 5 3 | 28.37 |
| IPRO02212      | 6 | 210 0 0  | 0 0 | 0 0 | 0 0 | 0 0 | 6 6 | 38.68 |
| IPRO02523      | 6 | 1576 0 0 | 1 1 | 2 2 | 0 0 | 2 2 | 0 0 | 8.87  |
| IPRO02642      | 6 | 140 0 0  | 0 0 | 0 0 | 0 0 | 3 3 | 4 4 | 24.11 |
| IPRO02654      | 6 | 307 4 4  | 0 0 | 0 0 | 0 0 | 1 1 | 1 1 | 14.46 |
| IPRO02740      | 6 | 404 3 3  | 1 1 | 2 2 | 0 0 | 0 0 | 0 0 | 31.15 |
| IPRO02939      | 6 | 2104 5 3 | 2 0 | 3 1 | 2 0 | 3 1 | 2 0 | 26.8  |
| IPRO03036      | 6 | 21 0 0   | 0 0 | 0 0 | 0 0 | 0 0 | 7 7 | 58.35 |
| IPRO03103      | 6 | 202 0 0  | 0 0 | 4 3 | 0 0 | 2 1 | 2 1 | 17.82 |
| IPRO03117      | 6 | 144 0 0  | 0 0 | 2 2 | 1 1 | 1 0 | 3 2 | 31.67 |
| IPRO03118      | 6 | 235 0 0  | 0 0 | 0 0 | 0 0 | 0 0 | 6 6 | 26.55 |
| IPRO03131      | 6 | 129 0 0  | 0 0 | 1 1 | 0 0 | 0 0 | 5 4 | 17.2  |
| IPRO03173      | 6 | 94 0 0   | 0 0 | 3 3 | 0 0 | 3 3 | 0 0 | 33.3  |
| IPRO03228      | 6 | 93 0 0   | 0 0 | 4 4 | 0 0 | 1 1 | 1 1 | 43.35 |
| IPRO03308      | 6 | 17 0 0   | 0 0 | 0 0 | 0 0 | 0 0 | 7 7 | 57.56 |
| IPRO03322      | 6 | 26 0 0   | 0 0 | 0 0 | 0 0 | 0 0 | 6 6 | 55.51 |
| IPRO03334      | 6 | 32 0 0   | 0 0 | 0 0 | 0 0 | 0 0 | 6 6 | 65.77 |
| IPRO03379      | 6 | 544 5 0  | 2 0 | 5 0 | 0 0 | 5 0 | 5 0 | 26.26 |
| IPRO03442      | 6 | 755 6 5  | 0 0 | 0 0 | 0 0 | 0 0 | 1 0 | 33.83 |
| IPRO03462      | 6 | 575 5 5  | 0 0 | 0 0 | 0 0 | 1 1 | 0 0 | 17.94 |
| IPRO03489      | 6 | 951 5 5  | 1 1 | 0 0 | 0 0 | 0 0 | 0 0 | 20.67 |
| IPRO03500      | 6 | 707 5 5  | 0 0 | 1 1 | 0 0 | 0 0 | 0 0 | 32.9  |
| IPRO03697      | 6 | 1034 2 2 | 3 3 | 0 0 | 0 0 | 1 1 | 0 0 | 27.02 |
| IPRO03718      | 6 | 1613 6 6 | 0 0 | 0 0 | 0 0 | 0 0 | 0 0 | 11.56 |
| IPRO03722      | 6 | 340 6 5  | 1 0 | 0 0 | 0 0 | 0 0 | 0 0 | 33.76 |
| IPRO03728      | 6 | 719 0 0  | 0 0 | 6 6 | 0 0 | 0 0 | 0 0 | 25.67 |
| IPRO03774      | 6 | 451 0 0  | 0 0 | 6 6 | 0 0 | 0 0 | 0 0 | 30.61 |

|           |   |          |     |     |     |     |     |       |
|-----------|---|----------|-----|-----|-----|-----|-----|-------|
| IPR003778 | 6 | 556 5 0  | 0 0 | 5 0 | 0 0 | 6 1 | 0 0 | 28.33 |
| IPR003837 | 6 | 667 3 3  | 0 0 | 1 1 | 0 0 | 1 1 | 1 1 | 24.08 |
| IPR003840 | 6 | 24 4 2   | 0 0 | 2 1 | 0 0 | 1 0 | 2 1 | 36.53 |
| IPR003855 | 6 | 656 0 0  | 0 0 | 6 6 | 0 0 | 6 0 | 0 0 | 33.39 |
| IPR003884 | 6 | 28 0 0   | 0 0 | 0 0 | 0 0 | 0 0 | 6 6 | 35.07 |
| IPR004094 | 6 | 96 0 0   | 0 0 | 0 0 | 0 0 | 0 0 | 6 6 | 41.46 |
| IPR004097 | 6 | 289 3 2  | 1 0 | 2 1 | 1 0 | 1 0 | 3 2 | 19.33 |
| IPR004165 | 6 | 1544 0 0 | 0 0 | 5 5 | 0 0 | 1 1 | 0 0 | 20.26 |
| IPR004166 | 6 | 97 0 0   | 0 0 | 0 0 | 0 0 | 0 0 | 5 5 | 15.15 |
| IPR004223 | 6 | 507 6 2  | 3 0 | 4 0 | 0 0 | 4 0 | 4 0 | 33.5  |
| IPR004254 | 6 | 869 0 0  | 0 0 | 5 5 | 0 0 | 0 0 | 1 1 | 19.2  |
| IPR004314 | 6 | 269 0 0  | 0 0 | 6 6 | 0 0 | 0 0 | 0 0 | 30.48 |
| IPR004518 | 6 | 1308 6 6 | 0 0 | 0 0 | 0 0 | 0 0 | 0 0 | 22.52 |
| IPR004813 | 6 | 576 0 0  | 0 0 | 1 1 | 0 0 | 5 5 | 0 0 | 12.68 |
| IPR004859 | 6 | 197 0 0  | 0 0 | 4 3 | 0 0 | 1 0 | 1 1 | 46.36 |
| IPR004865 | 6 | 48 0 0   | 0 0 | 0 0 | 0 0 | 0 0 | 6 6 | 41.69 |
| IPR004906 | 6 | 23 0 0   | 0 0 | 1 0 | 0 0 | 3 1 | 6 4 | 14.03 |
| IPR004923 | 6 | 357 4 3  | 0 0 | 1 0 | 0 0 | 2 2 | 0 0 | 20.1  |
| IPR005033 | 6 | 189 0 0  | 0 0 | 0 0 | 0 0 | 1 1 | 5 5 | 30.81 |
| IPR005062 | 6 | 333 0 0  | 0 0 | 0 0 | 0 0 | 3 3 | 3 3 | 11.2  |
| IPR005079 | 6 | 195 2 2  | 0 0 | 3 3 | 0 0 | 1 1 | 0 0 | 10.31 |
| IPR005154 | 6 | 72 6 4   | 2 0 | 0 0 | 0 0 | 2 0 | 0 0 | 16.58 |
| IPR005160 | 6 | 89 0 0   | 0 0 | 4 0 | 0 0 | 3 0 | 6 2 | 17.29 |
| IPR005194 | 6 | 214 5 3  | 0 0 | 0 0 | 3 1 | 2 0 | 0 0 | 17.99 |
| IPR005199 | 6 | 73 2 2   | 0 0 | 4 4 | 0 0 | 0 0 | 0 0 | 30.83 |
| IPR005202 | 6 | 484 0 0  | 0 0 | 6 6 | 0 0 | 0 0 | 0 0 | 23.94 |
| IPR005345 | 6 | 81 0 0   | 0 0 | 6 0 | 0 0 | 0 0 | 0 0 | 77.33 |
| IPR005381 | 6 | 49 0 0   | 0 0 | 7 7 | 0 0 | 0 0 | 0 0 | 41.08 |
| IPR005467 | 6 | 7 6 6    | 0 0 | 0 0 | 0 0 | 0 0 | 0 0 | 8.22  |
| IPR005493 | 6 | 713 3 3  | 1 1 | 2 2 | 0 0 | 0 0 | 0 0 | 22.98 |
| IPR005516 | 6 | 145 0 0  | 0 0 | 5 5 | 0 0 | 0 0 | 0 0 | 31.83 |
| IPR005552 | 6 | 165 1 1  | 0 0 | 0 0 | 0 0 | 6 6 | 6 6 | 26.4  |
| IPR005625 | 6 | 462 6 6  | 0 0 | 0 0 | 0 0 | 0 0 | 0 0 | 22.75 |
| IPR005631 | 6 | 407 0 0  | 0 0 | 0 0 | 0 0 | 3 3 | 1 1 | 30.2  |
| IPR005735 | 6 | 113 0 0  | 0 0 | 6 6 | 0 0 | 0 0 | 0 0 | 49.58 |
| IPR005811 | 6 | 1680 4 1 | 3 1 | 4 1 | 2 0 | 3 0 | 3 0 | 30.79 |
| IPR006034 | 6 | 835 3 3  | 0 0 | 0 0 | 0 0 | 3 2 | 1 0 | 21.84 |
| IPR006096 | 6 | 1054 2 2 | 1 0 | 3 2 | 0 0 | 2 0 | 1 0 | 23.67 |
| IPR006149 | 6 | 251 0 0  | 0 0 | 0 0 | 0 0 | 0 0 | 6 6 | 20.83 |
| IPR006164 | 6 | 421 0 0  | 0 0 | 4 0 | 2 0 | 4 0 | 6 2 | 19.36 |
| IPR006343 | 6 | 375 6 6  | 0 0 | 0 0 | 0 0 | 0 0 | 0 0 | 14.29 |
| IPR006603 | 6 | 475 0 0  | 0 0 | 1 0 | 1 0 | 4 3 | 4 3 | 26.58 |
| IPR006634 | 6 | 454 0 0  | 0 0 | 2 2 | 0 0 | 1 0 | 5 4 | 9.38  |
| IPR006677 | 6 | 225 0 0  | 0 0 | 1 0 | 3 2 | 4 3 | 3 3 | 19.22 |
| IPR006695 | 6 | 150 1 1  | 0 0 | 0 0 | 0 0 | 2 0 | 5 3 | 22.65 |
| IPR006714 | 6 | 41 6 6   | 0 0 | 0 0 | 0 0 | 0 0 | 0 0 | 12.91 |
| IPR006896 | 6 | 387 0 0  | 0 0 | 5 1 | 4 0 | 5 1 | 4 0 | 18.86 |
| IPR006910 | 6 | 162 0 0  | 0 0 | 1 0 | 1 0 | 6 5 | 1 0 | 33.7  |
| IPR006946 | 6 | 91 1 1   | 0 0 | 5 5 | 0 0 | 0 0 | 0 0 | 50.11 |
| IPR006969 | 6 | 84 6 6   | 0 0 | 0 0 | 0 0 | 0 0 | 0 0 | 35.19 |
| IPR006977 | 6 | 458 5 5  | 0 0 | 0 0 | 0 0 | 1 1 | 1 1 | 5.52  |
| IPR007053 | 6 | 185 2 2  | 0 0 | 4 4 | 0 0 | 0 0 | 0 0 | 20.07 |
| IPR007137 | 6 | 309 5 5  | 0 0 | 0 0 | 0 0 | 1 1 | 0 0 | 22.12 |
| IPR007167 | 6 | 943 6 5  | 1 0 | 0 0 | 0 0 | 0 0 | 0 0 | 17.11 |
| IPR007192 | 6 | 67 0 0   | 0 0 | 4 0 | 0 0 | 6 1 | 4 1 | 27.79 |
| IPR007194 | 6 | 251 0 0  | 0 0 | 1 1 | 0 0 | 5 5 | 0 0 | 22.19 |
| IPR007209 | 6 | 227 0 0  | 4 0 | 6 2 | 3 0 | 4 0 | 3 0 | 30.73 |
| IPR007210 | 6 | 1138 6 5 | 1 0 | 0 0 | 0 0 | 0 0 | 0 0 | 11.35 |
| IPR007237 | 6 | 172 0 0  | 0 0 | 0 0 | 0 0 | 0 0 | 5 5 | 11.78 |
| IPR007267 | 6 | 729 6 5  | 1 0 | 0 0 | 0 0 | 0 0 | 0 0 | 10.56 |
| IPR007370 | 6 | 244 7 7  | 0 0 | 0 0 | 0 0 | 0 0 | 0 0 | 38.58 |
| IPR007374 | 6 | 403 3 3  | 2 2 | 0 0 | 1 0 | 2 0 | 1 0 | 8.41  |
| IPR007420 | 6 | 385 0 0  | 0 0 | 1 1 | 0 0 | 1 1 | 4 4 | 24.14 |
| IPR007516 | 6 | 166 3 0  | 6 3 | 1 0 | 0 0 | 0 0 | 0 0 | 21.84 |
| IPR007547 | 6 | 50 0 0   | 0 0 | 0 0 | 0 0 | 5 5 | 1 1 | 28.68 |
| IPR007717 | 6 | 88 0 0   | 0 0 | 3 2 | 2 0 | 4 1 | 3 0 | 33.04 |
| IPR007739 | 6 | 98 6 6   | 0 0 | 0 0 | 0 0 | 0 0 | 0 0 | 14.98 |
| IPR007817 | 6 | 67 1 0   | 0 0 | 0 0 | 0 0 | 6 5 | 0 0 | 28.80 |
| IPR007854 | 6 | 91 0 0   | 0 0 | 3 3 | 1 1 | 0 0 | 1 1 | 46.07 |
| IPR007939 | 6 | 134 3 2  | 0 0 | 4 3 | 0 0 | 0 0 | 0 0 | 33.38 |
| IPR007942 | 6 | 33 0 0   | 0 0 | 6 6 | 0 0 | 0 0 | 0 0 | 29.14 |
| IPR008152 | 6 | 332 0 0  | 0 0 | 3 0 | 1 0 | 5 0 | 6 0 | 9.63  |
| IPR008164 | 6 | 89 1 1   | 0 0 | 0 0 | 0 0 | 0 0 | 4 4 | 36.08 |
| IPR008331 | 6 | 1859 1 1 | 1 1 | 4 4 | 0 0 | 0 0 | 0 0 | 10.24 |
| IPR008332 | 6 | 418 6 5  | 1 0 | 0 0 | 0 0 | 1 0 | 1 0 | 15.37 |
| IPR008456 | 6 | 148 6 6  | 0 0 | 0 0 | 0 0 | 0 0 | 0 0 | 15.62 |
| IPR008457 | 6 | 417 6 5  | 1 0 | 0 0 | 0 0 | 0 0 | 0 0 | 11.36 |
| IPR008507 | 6 | 93 0 0   | 0 0 | 6 6 | 0 0 | 0 0 | 0 0 | 33.73 |
| IPR008521 | 6 | 298 2 1  | 0 0 | 0 0 | 0 0 | 2 1 | 0 0 | 23.11 |
| IPR008532 | 6 | 513 2 0  | 2 0 | 3 1 | 2 0 | 3 1 | 3 1 | 24.08 |
| IPR008541 | 6 | 153 6 6  | 0 0 | 0 0 | 0 0 | 0 0 | 0 0 | 29.05 |
| IPR008543 | 6 | 42 0 0   | 0 0 | 6 6 | 0 0 | 0 0 | 0 0 | 22.47 |
| IPR008553 | 6 | 34 0 0   | 6 6 | 0 0 | 0 0 | 0 0 | 0 0 | 20.42 |
| IPR008629 | 6 | 118 6 6  | 0 0 | 0 0 | 0 0 | 0 0 | 0 0 | 30.56 |
| IPR008646 | 6 | 19 0 0   | 0 0 | 0 0 | 0 0 | 5 5 | 4 0 | 42.49 |
| IPR008795 | 6 | 145 0 0  | 0 0 | 0 0 | 0 0 | 0 0 | 2 2 | 13.18 |
| IPR008801 | 6 | 133 0 0  | 0 0 | 6 6 | 0 0 | 0 0 | 0 0 | 35.3  |
| IPR008811 | 6 | 160 0 0  | 0 0 | 4 4 | 0 0 | 2 2 | 0 0 | 28    |
| IPR008880 | 6 | 789 5 3  | 0 0 | 3 1 | 0 0 | 0 0 | 0 0 | 17.48 |
| IPR008909 | 6 | 1415 4 2 | 2 0 | 2 0 | 2 0 | 2 0 | 2 0 | 18.49 |
| IPR009038 | 6 | 163 0 0  | 0 0 | 2 0 | 0 0 | 6 4 | 0 0 | 18.99 |
| IPR009224 | 6 | 16 0 0   | 0 0 | 0 0 | 0 0 | 0 0 | 6 6 | 54.86 |
| IPR009232 | 6 | 4 0 0    | 0 0 | 0 0 | 0 0 | 0 0 | 6 6 | 75.35 |
| IPR009234 | 6 | 7 0 0    | 0 0 | 0 0 | 0 0 | 0 0 | 6 6 | 53.32 |
| IPR009240 | 6 | 65 0 0   | 0 0 | 0 0 | 0 0 | 0 0 | 6 6 | 63.65 |
| IPR009297 | 6 | 163 6 6  | 0 0 | 0 0 | 0 0 | 0 0 | 0 0 | 29.62 |
| IPR009342 | 6 | 233 6 3  | 3 0 | 0 0 | 0 0 | 0 0 | 0 0 | 30.67 |
| IPR009428 | 6 | 22 0 0   | 0 0 | 0 0 | 0 0 | 0 0 | 6 6 | 43.32 |
| IPR009674 | 6 | 75 0 0   | 0 0 | 5 0 | 4 0 | 5 0 | 6 0 | 41.51 |
| IPR009723 | 6 | 79 0 0   | 0 0 | 5 4 | 1 0 | 2 1 | 1 0 | 31.25 |
| IPR009737 | 6 | 171 3 3  | 0 0 | 0 0 | 0 0 | 3 3 | 0 0 | 19.17 |
| IPR010264 | 6 | 149 0 0  | 0 0 | 2 2 | 0 0 | 0 0 | 4 4 | 18.92 |
| IPR010323 | 6 | 205 0 0  | 0 0 | 4 4 | 0 0 | 2 2 | 0 0 | 35.64 |
| IPR010383 | 6 | 248 6 3  | 3 0 | 0 0 | 0 0 | 1 0 | 0 0 | 20.45 |
| IPR010401 | 6 | 296 5 2  | 1 0 | 0 0 | 0 0 | 3 1 | 1 0 | 19.44 |
| IPR010403 | 6 | 239 6 3  | 0 0 | 0 0 | 0 0 | 1 0 | 0 0 | 19.99 |
| IPR010440 | 6 | 373 4 4  | 1 1 | 0 0 | 0 0 | 1 1 | 0 0 | 9.41  |
| IPR010482 | 6 | 77 0 0   | 0 0 | 0 0 | 0 0 | 4 4 | 0 0 | 18.8  |
| IPR010515 | 6 | 45 0 0   | 0 0 | 0 0 | 0 0 | 0 0 | 6 6 | 44.98 |
| IPR010572 | 6 | 76 6 6   | 0 0 | 0 0 | 0 0 | 0 0 | 0 0 | 10.28 |
| IPR010661 | 6 | 14 0 0   | 0 0 | 0 0 | 0 0 | 0 0 | 7 7 | 78.13 |
| IPR010720 | 6 | 234 4 3  | 0 0 | 2 1 | 0 0 | 1 1 | 0 0 | 14.59 |
| IPR010722 | 6 | 903 5 3  | 2 0 | 2 0 | 0 0 | 2 1 | 0 0 | 21.99 |
| IPR010734 | 6 | 43 0 0   | 0 0 | 6 5 | 0 0 | 0 0 | 1 0 | 31.22 |
| IPR010737 | 6 | 346 2 2  | 0 0 | 2 2 | 0 0 | 2 2 | 0 0 | 11.23 |
| IPR010795 | 6 | 62 0 0   | 0 0 | 3 2 | 0 0 | 2 1 | 2 1 | 28.84 |
| IPR010827 | 6 | 2937 6 5 | 0 0 | 1 0 | 0 0 | 0 0 | 1 0 | 9.46  |
| IPR010902 | 6 | 34 7 7   | 0 0 | 0 0 | 0 0 | 0 0 | 0 0 | 22.86 |
| IPR010929 | 6 | 241 0 0  | 0 0 | 1 0 | 0 0 | 6 5 | 0 0 | 27.22 |
| IPR010930 | 6 | 2367 5 4 | 0 0 | 2 1 | 0 0 | 0 0 | 0 0 | 29.87 |
| IPR010939 | 6 | 273 0 0  | 0 0 | 0 0 | 0 0 | 0 0 | 6 6 | 30.06 |
| IPR011116 | 6 | 861 3 1  | 0 0 | 5 3 | 0 0 | 0 0 | 0 0 | 32.69 |
| IPR011601 | 6 | 775 6 2  | 1 0 | 1 0 | 0 0 | 4 0 | 0 0 | 31.17 |
| IPR011629 | 6 | 1130 2 1 | 1 0 | 5 4 | 1 0 | 2 1 | 1 0 | 15.43 |
| IPR011637 | 6 | 1395 7 7 | 0 0 | 0 0 | 0 0 | 0 0 | 0 0 | 14.45 |
| IPR011663 | 6 | 1797 5 4 | 0 0 | 2 1 | 0 0 | 0 0 | 0 0 | 9.08  |
| IPR011759 | 6 | 619 6 5  | 1 0 | 1 0 | 0 0 | 1 0 | 1 0 | 21.65 |
| IPR012062 | 6 | 143 1 1  | 0 0 | 5 5 | 0 0 | 0 0 | 0 0 | 48.92 |
| IPR012301 | 6 | 1257 4 2 | 2 0 | 2 1 | 1 0 | 1 0 | 2 1 | 36.35 |
| IPR012314 | 6 | 33 2 2   | 0 0 | 0 0 | 0 0 | 0 0 | 4 4 | 41.12 |
| IPR012437 | 6 | 48 6 6   | 0 0 | 0 0 | 0 0 | 0 0 | 0 0 | 12.45 |
| IPR012590 | 6 | 72 0 0   | 0 0 | 5 4 | 1 0 | 2 1 | 1 0 | 24.87 |
| IPR012855 | 6 | 212 6 6  | 0 0 | 0 0 | 0 0 | 0 0 | 0 0 | 27.65 |
| IPR012893 | 6 | 444 3 2  | 0 0 | 3 2 | 0 0 | 0 0 | 0 0 | 19.35 |
| IPR012894 | 6 | 429 3 2  | 0 0 | 3 2 | 0 0 | 0 0 | 0 0 | 18.91 |
| IPR012913 | 6 | 235 0 0  | 0 0 | 0 0 | 0 0 | 2 2 | 4 4 | 16.13 |
| IPR012919 | 6 | 225 1 1  | 0 0 | 0 0 | 0 0 | 5 5 | 0 0 | 19.36 |
| IPR012948 | 6 | 127 0 0  | 0 0 | 3 1 | 2 1 | 4 2 | 2 0 | 32.81 |
| IPR012961 | 6 | 297 4 1  | 0 0 | 4 2 | 2 0 | 3 0 | 2 0 | 21.57 |
| IPR013107 | 6 | 711 4 3  | 0 0 | 0 0 | 0 0 | 3 2 | 0 0 | 14.8  |
| IPR013113 | 6 | 364 6 5  | 0 0 | 1 0 | 0 0 | 0 0 | 0 0 | 30.09 |
| IPR013115 | 6 | 363 1 0  | 1 0 | 1 0 | 0 0 | 6 5 | 0 0 | 30.1  |
| IPR013118 | 6 | 676 6 5  | 0 0 | 0 0 | 0 0 | 0 0 | 0 0 | 22.82 |
| IPR013136 | 6 | 70 0 0   | 0 0 | 2 0 | 0 0 | 3 1 | 5 3 | 34.1  |
| IPR013182 | 6 | 58 0 0   | 0 0 | 0 0 | 0 0 | 6 6 | 0 0 | 35.82 |
| IPR013243 | 6 | 65 0 0   | 0   |     |     |     |     |       |

|                |   |          |     |     |     |     |      |       |
|----------------|---|----------|-----|-----|-----|-----|------|-------|
| IPRO13270      | 6 | 16 0 0   | 0 0 | 0 0 | 0 0 | 0 0 | 6 6  | 53.26 |
| IPRO13547      | 6 | 363 0 0  | 0 0 | 0 0 | 0 0 | 0 0 | 5 5  | 21.63 |
| IPRO13552      | 6 | 26 6 6   | 0 0 | 0 0 | 0 0 | 0 0 | 0 0  | 22.78 |
| IPRO13563      | 6 | 5206 4 2 | 2 0 | 3 2 | 0 0 | 0 0 | 0 0  | 29.02 |
| IPRO13606      | 6 | 98 0 0   | 0 0 | 0 0 | 0 0 | 0 0 | 5 5  | 23.58 |
| IPRO13709      | 6 | 983 4 3  | 1 0 | 1 0 | 0 0 | 3 2 | 0 0  | 20.59 |
| IPRO13738      | 6 | 199 5 2  | 2 0 | 0 0 | 0 0 | 2 0 | 0 0  | 18.3  |
| IPRO13798      | 6 | 765 3 1  | 1 0 | 1 1 | 0 0 | 3 2 | 0 0  | 34.88 |
| IPRO13820      | 6 | 725 2 1  | 1 0 | 1 0 | 0 0 | 0 0 | 0 0  | 31.53 |
| IPRO13858      | 6 | 82 6 5   | 0 0 | 1 0 | 0 0 | 0 0 | 0 0  | 31.80 |
| IPRO13932      | 6 | 77 0 0   | 0 0 | 2 1 | 0 0 | 3 2 | 2 1  | 43.46 |
| IPRO13989      | 6 | 96 1 1   | 0 0 | 4 4 | 0 0 | 0 0 | 0 0  | 39.77 |
| IPRO14004      | 6 | 411 6 6  | 0 0 | 0 0 | 0 0 | 0 0 | 0 0  | 26.75 |
| IPRO14015      | 6 | 85 5 2   | 4 1 | 0 0 | 0 0 | 0 0 | 0 0  | 17.01 |
| IPRO14027      | 6 | 1372 5 2 | 3 0 | 2 0 | 0 0 | 2 0 | 2 0  | 24.8  |
| IPRO14742      | 6 | 44 0 0   | 0 0 | 0 0 | 0 0 | 0 0 | 6 6  | 81.65 |
| IPRO14744      | 6 | 10 0 0   | 0 0 | 0 0 | 0 0 | 0 0 | 6 6  | 45.21 |
| IPRO14770      | 6 | 36 0 0   | 0 0 | 0 0 | 0 0 | 0 0 | 5 5  | 41.68 |
| IPRO15008      | 6 | 25 0 0   | 0 0 | 0 0 | 0 0 | 0 0 | 6 6  | 50.8  |
| IPRO15010      | 6 | 40 0 0   | 0 0 | 0 0 | 0 0 | 6 6 | 0 0  | 34.78 |
| IPRO15022      | 6 | 35 0 0   | 0 0 | 0 0 | 0 0 | 0 0 | 6 6  | 60.26 |
| IPRO15116      | 6 | 19 0 0   | 0 0 | 0 0 | 0 0 | 0 0 | 6 6  | 46.68 |
| IPRO15143      | 6 | 11 0 0   | 0 0 | 0 0 | 0 0 | 0 0 | 6 6  | 38.86 |
| IPRO15149      | 6 | 10 0 0   | 0 0 | 0 0 | 0 0 | 0 0 | 6 6  | 68.62 |
| IPRO15153      | 6 | 137 0 0  | 0 0 | 0 0 | 0 0 | 0 0 | 7 7  | 36.27 |
| IPRO15154      | 6 | 114 0 0  | 0 0 | 0 0 | 0 0 | 0 0 | 7 7  | 47.21 |
| IPRO15190      | 6 | 184 7 7  | 0 0 | 0 0 | 0 0 | 0 0 | 0 0  | 26.28 |
| IPRO15255      | 6 | 83 0 0   | 0 0 | 0 0 | 0 0 | 0 0 | 9 9  | 13    |
| IPRO15387      | 6 | 12 6 6   | 0 0 | 0 0 | 0 0 | 0 0 | 0 0  | 34.86 |
| IPRO15403      | 6 | 157 0 0  | 0 0 | 2 1 | 1 0 | 2 1 | 4 3  | 32.26 |
| IPRO15404      | 6 | 256 0 0  | 0 0 | 1 0 | 1 0 | 4 3 | 3 2  | 10    |
| IPRO15406      | 6 | 136 6 6  | 0 0 | 0 0 | 0 0 | 0 0 | 0 0  | 38.27 |
| IPRO15800      | 6 | 235 3 1  | 2 0 | 3 1 | 0 0 | 5 3 | 2 0  | 19.44 |
| IPRO16009      | 6 | 892 3 3  | 0 0 | 0 0 | 0 0 | 1 1 | 2 2  | 33.6  |
| IPRO16072      | 6 | 67 0 0   | 0 0 | 5 3 | 0 0 | 1 0 | 2 1  | 23.27 |
| IPRO17852      | 6 | 113 0 0  | 0 0 | 2 0 | 0 0 | 2 0 | 6 4  | 18.61 |
| IPRO17890      | 6 | 75 0 0   | 0 0 | 4 1 | 0 0 | 4 0 | 5 1  | 42.87 |
| IPRO17903      | 6 | 50 0 0   | 0 0 | 0 0 | 0 0 | 6 6 | 7 7  | 31.44 |
| IPRO17921      | 6 | 21 0 0   | 0 0 | 2 0 | 0 0 | 0 0 | 5 3  | 56.8  |
| IPRO17926      | 6 | 364 5 3  | 3 1 | 2 0 | 0 0 | 2 0 | 2 0  | 40.74 |
| IPRO17927      | 6 | 47 5 5   | 0 0 | 0 0 | 0 0 | 2 2 | 0 0  | 9.37  |
| IPRO17930      | 6 | 37 0 0   | 0 0 | 3 2 | 0 0 | 2 1 | 1 0  | 17.97 |
| IPRO17940      | 6 | 24 3 2   | 0 0 | 2 1 | 0 0 | 2 0 | 1 1  | 6.87  |
| IPRO18154      | 6 | 101 0 0  | 0 0 | 0 0 | 0 0 | 0 0 | 7 7  | 29.45 |
| IPRO18203      | 6 | 229 3 3  | 0 0 | 1 1 | 1 1 | 1 1 | 1 1  | 28.54 |
| IPRO18317      | 6 | 605 3 3  | 3 3 | 0 0 | 0 0 | 0 0 | 0 0  | 31.08 |
| IPRO18379      | 6 | 137 0 0  | 0 0 | 0 0 | 0 0 | 0 0 | 6 6  | 14.91 |
| IPRO18485      | 6 | 2379 4 3 | 1 0 | 2 1 | 1 0 | 2 1 | 1 0  | 16.52 |
| IPRO18541      | 6 | 843 6 5  | 0 0 | 1 0 | 0 0 | 0 0 | 0 0  | 43.34 |
| IPRO18876      | 6 | 31 6 6   | 0 0 | 0 0 | 0 0 | 0 0 | 0 0  | 35.58 |
| IPRO18941      | 6 | 16 0 0   | 0 0 | 0 0 | 0 0 | 0 0 | 6 6  | 83.66 |
| IPRO18946      | 6 | 420 5 5  | 0 0 | 0 0 | 0 0 | 1 1 | 0 0  | 17.95 |
| IPRO18951      | 6 | 1072 2 1 | 1 0 | 1 0 | 0 0 | 2 1 | 4 3  | 38.46 |
| IPRO19012      | 6 | 98 1 1   | 0 0 | 2 2 | 1 1 | 1 1 | 1 1  | 35.23 |
| IPRO19035      | 6 | 65 0 0   | 0 0 | 0 0 | 0 0 | 4 4 | 3 3  | 36.61 |
| IPRO19079      | 6 | 323 7 7  | 0 0 | 0 0 | 0 0 | 0 0 | 0 0  | 21.75 |
| IPRO19191      | 6 | 92 2 2   | 0 0 | 2 2 | 0 0 | 3 3 | 0 0  | 30.25 |
| IPRO19316      | 6 | 51 5 5   | 0 0 | 2 0 | 0 0 | 0 0 | 2 0  | 25.48 |
| IPRO19396      | 6 | 93 0 0   | 0 0 | 4 4 | 1 1 | 0 0 | 1 1  | 23.45 |
| IPRO19406      | 6 | 72 0 0   | 0 0 | 0 0 | 1 0 | 0 0 | 5 4  | 53.65 |
| IPRO19411      | 6 | 164 0 0  | 0 0 | 1 0 | 3 3 | 0 0 | 4 3  | 18.08 |
| IPRO19415      | 6 | 35 0 0   | 0 0 | 0 0 | 0 0 | 6 6 | 0 0  | 33.98 |
| IPRO19443      | 6 | 76 0 0   | 0 0 | 1 0 | 0 0 | 6 3 | 3 0  | 19.34 |
| IPRO19452      | 6 | 86 0 0   | 0 0 | 4 1 | 3 0 | 3 0 | 3 0  | 29.99 |
| IPRO19456      | 6 | 253 6 2  | 0 0 | 4 0 | 0 0 | 0 0 | 0 0  | 39.54 |
| IPRO19475      | 6 | 551 6 6  | 0 0 | 0 0 | 0 0 | 0 0 | 0 0  | 12.05 |
| IPRO19499      | 6 | 738 5 2  | 0 0 | 4 1 | 2 0 | 2 0 | 3 1  | 30.64 |
| IPRO19558      | 6 | 97 0 0   | 0 0 | 0 0 | 0 0 | 2 1 | 4 3  | 32.18 |
| IPRO19559      | 6 | 351 0 0  | 0 0 | 2 0 | 2 0 | 2 1 | 5 3  | 33.82 |
| IPRO19568      | 6 | 24 3 2   | 0 0 | 0 0 | 0 0 | 0 0 | 4 3  | 46.33 |
| IPRO19572      | 6 | 261 0 0  | 0 0 | 5 1 | 3 0 | 4 0 | 5 1  | 41.53 |
| IPRO19583      | 6 | 38 0 0   | 0 0 | 0 0 | 0 0 | 0 0 | 7 7  | 55.78 |
| IPRO19590      | 6 | 33 0 0   | 0 0 | 0 0 | 0 0 | 7 7 | 0 0  | 50.47 |
| IPRO20046      | 6 | 99 5 3   | 0 0 | 3 1 | 1 0 | 0 0 | 0 0  | 19.54 |
| IPRO20047      | 6 | 37 4 3   | 0 0 | 1 0 | 0 0 | 1 0 | 2 1  | 32.95 |
| IPRO20536      | 6 | 426 6 3  | 3 0 | 0 0 | 0 0 | 0 0 | 0 0  | 27.6  |
| IPRO20573      | 6 | 484 7 7  | 0 0 | 0 0 | 0 0 | 0 0 | 0 0  | 22.47 |
| IPRO21012      | 6 | 68 0 0   | 0 0 | 0 0 | 0 0 | 0 0 | 6 6  | 98.08 |
| IPRO21128      | 6 | 458 0 0  | 0 0 | 0 0 | 0 0 | 2 2 | 3 3  | 6.34  |
| IPRO21147      | 6 | 285 6 6  | 0 0 | 0 0 | 0 0 | 0 0 | 0 0  | 9.74  |
| IPRO21257      | 6 | 98 6 6   | 0 0 | 0 0 | 0 0 | 0 0 | 0 0  | 23.15 |
| IPRO21327      | 6 | 151 6 6  | 0 0 | 0 0 | 0 0 | 0 0 | 0 0  | 31.74 |
| IPRO21586      | 6 | 116 6 5  | 1 0 | 0 0 | 0 0 | 0 0 | 0 0  | 9.7   |
| IPRO21647      | 6 | 299 6 6  | 0 0 | 0 0 | 0 0 | 0 0 | 0 0  | 26.11 |
| IPRO21729      | 6 | 264 6 6  | 0 0 | 0 0 | 0 0 | 0 0 | 0 0  | 12.9  |
| IPRO21789      | 6 | 83 0 0   | 0 0 | 3 3 | 0 0 | 0 0 | 3 3  | 34.35 |
| IPRO21810      | 6 | 147 7 5  | 2 0 | 2 0 | 0 0 | 0 0 | 0 0  | 22.83 |
| IPRO21835      | 6 | 105 6 3  | 3 0 | 0 0 | 0 0 | 0 0 | 0 0  | 16.7  |
| IPRO21894      | 6 | 39 0 0   | 0 0 | 2 2 | 0 0 | 4 4 | 0 0  | 37.36 |
| IPRO22048      | 6 | 46 0 0   | 0 0 | 0 0 | 0 0 | 0 0 | 7 7  | 60.46 |
| IPRO22087      | 6 | 50 0 0   | 0 0 | 7 7 | 0 0 | 0 0 | 0 0  | 49.84 |
| IPRO22100      | 6 | 52 0 0   | 0 0 | 2 0 | 0 0 | 3 1 | 5 3  | 42.96 |
| IPRO22125      | 6 | 58 0 0   | 0 0 | 3 2 | 0 0 | 3 1 | 3 1  | 17.7  |
| IPRO22140      | 6 | 86 0 0   | 0 0 | 0 0 | 0 0 | 5 1 | 5 1  | 32.69 |
| IPRO22212      | 6 | 70 0 0   | 0 0 | 7 7 | 0 0 | 0 0 | 0 0  | 37.64 |
| IPRO22310      | 6 | 1721 5 2 | 3 0 | 1 0 | 2 0 | 3 0 | 4 1  | 39.91 |
| PF02160        | 6 | 9 0 0    | 0 0 | 5 4 | 0 0 | 2 1 | 0 0  | 39.91 |
| PF02311        | 6 | 1867 7 6 | 0 0 | 1 0 | 0 0 | 0 0 | 0 0  | 4.42  |
| PF03543        | 6 | 25 6 6   | 0 0 | 0 0 | 0 0 | 0 0 | 0 0  | 13.31 |
| PF04056        | 6 | 45 2 2   | 0 0 | 4 3 | 0 0 | 2 0 | 2 0  | 19.63 |
| PF04193        | 6 | 398 0 0  | 0 0 | 1 0 | 1 0 | 4 3 | 4 3  | 9.33  |
| PF04366        | 6 | 299 0 0  | 0 0 | 4 4 | 1 0 | 2 2 | 0 0  | 15.31 |
| PF05935        | 6 | 244 4 4  | 0 0 | 0 0 | 0 0 | 2 2 | 0 0  | 14.09 |
| PF06983        | 6 | 593 6 6  | 0 0 | 0 0 | 0 0 | 0 0 | 0 0  | 25.15 |
| PF11414        | 6 | 36 0 0   | 0 0 | 0 0 | 0 0 | 0 0 | 6 6  | 30.95 |
| PF11543        | 6 | 39 0 0   | 0 0 | 4 3 | 2 0 | 2 0 | 3 1  | 31.57 |
| PF11547        | 6 | 17 0 0   | 0 0 | 0 0 | 0 0 | 0 0 | 7 7  | 89.93 |
| PF11716        | 6 | 462 7 7  | 0 0 | 0 0 | 0 0 | 0 0 | 0 0  | 8.93  |
| PF11793        | 6 | 63 0 0   | 0 0 | 1 1 | 0 0 | 2 1 | 4 3  | 30.02 |
| PF11901        | 6 | 112 0 0  | 0 0 | 0 0 | 0 0 | 1 1 | 5 5  | 23.71 |
| PF11926        | 6 | 138 0 0  | 0 0 | 5 5 | 0 0 | 0 0 | 0 0  | 28.3  |
| PF11941        | 6 | 183 6 6  | 0 0 | 0 0 | 0 0 | 0 0 | 0 0  | 13.1  |
| PF12143        | 6 | 52 1 0   | 0 0 | 6 5 | 0 0 | 0 0 | 0 0  | 40.07 |
| PF12344        | 6 | 740 4 1  | 3 0 | 4 2 | 0 0 | 0 0 | 0 0  | 53.67 |
| PF12464        | 6 | 376 5 0  | 2 0 | 0 0 | 0 0 | 6 1 | 0 0  | 22.14 |
| PF12569        | 6 | 68 0 0   | 0 0 | 4 1 | 0 0 | 5 2 | 3 0  | 43.2  |
| PTHR11254      | 6 | 6 0 0    | 0 0 | 5 5 | 0 0 | 0 0 | 0 0  | 9.4   |
| PTHR12183      | 6 | 78 0 0   | 0 0 | 2 1 | 2 1 | 0 0 | 2 2  | 37.18 |
| PTHR16166      | 6 | 21 0 0   | 0 0 | 3 3 | 0 0 | 3 3 | 0 0  | 23.01 |
| PTHR16166-SF25 | 6 | 20 0 0   | 0 0 | 3 3 | 0 0 | 3 3 | 0 0  | 24.47 |
| PTHR19222      | 6 | 117 5 4  | 2 1 | 0 0 | 0 0 | 0 0 | 0 0  | 11.08 |
| PTHR22814      | 6 | 28 0 0   | 0 0 | 6 6 | 0 0 | 0 0 | 0 0  | 17.05 |
| PTHR22908      | 6 | 15 1 1   | 0 0 | 0 0 | 0 0 | 0 0 | 5 5  | 15.19 |
| PTHR23083-SF16 | 6 | 32 6 6   | 0 0 | 0 0 | 0 0 | 0 0 | 0 0  | 8.22  |
| PTHR23416      | 6 | 490 6 3  | 0 0 | 2 0 | 0 0 | 2 0 | 0 0  | 33.9  |
| TIGR01376      | 6 | 11 6 6   | 0 0 | 0 0 | 0 0 | 0 0 | 0 0  | 38.79 |
| TIGR01451      | 6 | 66 7 7   | 0 0 | 0 0 | 0 0 | 0 0 | 0 0  | 21.83 |
| TIGR03660      | 6 | 185 6 6  | 0 0 | 0 0 | 0 0 | 0 0 | 0 0  | 36.6  |
| IPRO00007      | 7 | 188 0 0  | 0 0 | 5 5 | 0 0 | 0 0 | 2 2  | 33.98 |
| IPRO00015      | 7 | 754 4 4  | 0 0 | 3 3 | 0 0 | 0 0 | 0 0  | 17.68 |
| IPRO00023      | 7 | 1057 2 2 | 0 0 | 4 4 | 0 0 | 1 1 | 0 0  | 28.26 |
| IPRO00181      | 7 | 1291 4 4 | 0 0 | 3 3 | 0 0 | 0 0 | 0 0  | 32.52 |
| IPRO00232      | 7 | 409 0 0  | 0 0 | 2 2 | 0 0 | 1 1 | 4 4  | 38.09 |
| IPRO00341      | 7 | 114 0 0  | 0 0 | 0 0 | 3 0 | 0 0 | 7 4  | 18.38 |
| IPRO00514      | 7 | 102 7 7  | 0 0 | 0 0 | 0 0 | 0 0 | 10 7 | 17.19 |
| IPRO00523      | 7 | 190 4 2  | 3 1 | 1 1 | 0 0 | 0 0 | 1 1  | 28.12 |
| IPRO00642      | 7 | 1438 5 2 | 0 0 | 5 2 | 0 0 | 4 2 | 0 0  | 33.86 |
| IPRO00711      | 7 | 855 2 1  | 0 0 | 5 4 | 0 0 | 0 0 | 1 1  | 18.41 |
| IPRO00811      | 7 | 851 4 2  | 2 0 | 3 3 | 0 0 | 0 0 | 0 0  | 30.04 |
| IPRO00846      | 7 | 1765 5 5 | 0 0 | 3 3 | 0 0 | 0 0 | 0 0  | 13.29 |
| IPRO01046      | 7 | 897 3 3  | 1 1 | 4 4 | 0 0 | 0 0 | 1 1  | 17.68 |
| IPRO01063      | 7 | 1015 0 0 | 0 0 | 1 1 | 0 0 | 0 0 | 3 3  | 31.74 |
| IPRO01075      | 7 | 785 5 4  | 0 0 | 3 2 | 1 0 | 1 0 | 1 0  | 35.02 |
| IPRO01127      | 7 | 782 7 7  | 0 0 | 0 0 | 0 0 | 0 0 | 0 0  | 39.45 |
| IPRO01339      | 7 | 108 0 0  | 0 0 | 2 0 | 2 1 | 1 0 | 3 1  | 29.09 |
| IPRO01424      | 7 | 672 1 1  | 0 0 | 3 2 | 0 0 | 1 0 | 4 3  | 24.89 |
| IPRO01444      | 7 | 2469 7 6 | 0 0 | 1 0 | 0 0 | 0 0 | 0 0  | 34.86 |

|           |   |          |     |     |     |     |       |       |
|-----------|---|----------|-----|-----|-----|-----|-------|-------|
| IPR001619 | 7 | 461 0 0  | 0 0 | 2 2 | 0 0 | 1 1 | 0 0   | 12.8  |
| IPR001636 | 7 | 877 4 4  | 1 1 | 0 0 | 0 0 | 0 0 | 1 1   | 29.22 |
| IPR001694 | 7 | 1207 4 3 | 0 0 | 4 3 | 0 0 | 0 0 | 0 0   | 26.79 |
| IPR001699 | 7 | 344 0 0  | 0 0 | 0 0 | 0 0 | 0 0 | 5 5   | 40.51 |
| IPR001796 | 7 | 692 2 2  | 0 0 | 4 3 | 1 0 | 1 1 | 0 0   | 32.96 |
| IPR001865 | 7 | 1012 1 1 | 0 0 | 5 5 | 0 0 | 1 1 | 0 0   | 39.9  |
| IPR001874 | 7 | 640 3 3  | 0 0 | 0 0 | 0 0 | 4 4 | 0 0   | 45.37 |
| IPR001959 | 7 | 1464 7 5 | 2 0 | 0 0 | 0 0 | 0 0 | 0 0   | 13.34 |
| IPR001971 | 7 | 1092 0 0 | 0 0 | 2 2 | 0 0 | 4 4 | 1 1   | 44.08 |
| IPR002036 | 7 | 788 5 5  | 0 0 | 1 1 | 1 1 | 0 0 | 0 0   | 27.68 |
| IPR002119 | 7 | 525 0 0  | 0 0 | 2 2 | 0 0 | 0 0 | 3 3   | 48.54 |
| IPR002196 | 7 | 408 7 7  | 0 0 | 0 0 | 0 0 | 0 0 | 0 0   | 17.87 |
| IPR002346 | 7 | 988 7 2  | 1 0 | 5 0 | 0 0 | 5 0 | 5 0   | 20.44 |
| IPR002369 | 7 | 134 1 1  | 0 0 | 0 0 | 0 0 | 0 0 | 6 6   | 42.49 |
| IPR002489 | 7 | 841 6 1  | 0 0 | 5 1 | 4 0 | 4 0 | 4 0   | 33.62 |
| IPR002496 | 7 | 705 4 3  | 1 0 | 2 1 | 0 0 | 3 2 | 0 0   | 51.1  |
| IPR002558 | 7 | 119 0 0  | 0 0 | 0 0 | 0 0 | 2 0 | 7 5   | 35.59 |
| IPR002569 | 7 | 1148 6 5 | 2 1 | 1 1 | 0 0 | 0 0 | 0 0   | 39.19 |
| IPR002594 | 7 | 125 6 6  | 0 0 | 0 0 | 0 0 | 1 1 | 0 0   | 22.49 |
| IPR002602 | 7 | 112 0 0  | 0 0 | 0 0 | 0 0 | 0 0 | 8 8   | 30.59 |
| IPR002622 | 7 | 290 5 5  | 1 1 | 0 0 | 0 0 | 0 0 | 1 1   | 16.37 |
| IPR002634 | 7 | 900 1 1  | 0 0 | 4 4 | 0 0 | 0 0 | 2 2   | 32.28 |
| IPR002750 | 7 | 312 7 7  | 0 0 | 0 0 | 0 0 | 0 0 | 0 0   | 23.17 |
| IPR002761 | 7 | 189 1 1  | 0 0 | 4 3 | 0 0 | 2 1 | 2 1   | 22.85 |
| IPR002791 | 7 | 257 0 0  | 0 0 | 2 1 | 1 1 | 4 4 | 1 0   | 14.51 |
| IPR002878 | 7 | 508 6 6  | 2 2 | 0 0 | 0 0 | 0 0 | 0 0   | 18.45 |
| IPR002903 | 7 | 798 1 1  | 0 0 | 4 4 | 0 0 | 2 2 | 0 0   | 38.9  |
| IPR002988 | 7 | 45 7 7   | 0 0 | 0 0 | 0 0 | 0 0 | 0 0   | 55.74 |
| IPR003008 | 7 | 141 2 1  | 1 0 | 5 3 | 1 0 | 2 0 | 3 0   | 9.61  |
| IPR003114 | 7 | 139 0 0  | 0 0 | 4 2 | 0 0 | 5 2 | 4 1   | 17.42 |
| IPR003140 | 7 | 900 5 5  | 0 0 | 0 0 | 0 0 | 2 2 | 0 0   | 12.62 |
| IPR003190 | 7 | 455 0 0  | 0 0 | 7 7 | 0 0 | 0 0 | 0 0   | 47.26 |
| IPR003220 | 7 | 279 6 5  | 1 0 | 0 0 | 0 0 | 1 1 | 0 0   | 32.87 |
| IPR003309 | 7 | 281 0 0  | 0 0 | 0 0 | 0 0 | 0 0 | 8 8   | 43.12 |
| IPR003316 | 7 | 320 0 0  | 0 0 | 3 2 | 0 0 | 1 0 | 6 5   | 29.63 |
| IPR003331 | 7 | 711 6 6  | 0 0 | 0 0 | 0 0 | 0 0 | 1 1   | 26.87 |
| IPR003338 | 7 | 327 1 0  | 7 3 | 2 0 | 2 0 | 4 0 | 4 0   | 18.04 |
| IPR003392 | 7 | 268 1 0  | 0 0 | 0 0 | 0 0 | 7 5 | 0 0   | 14.72 |
| IPR003488 | 7 | 788 7 7  | 0 0 | 0 0 | 0 0 | 0 0 | 0 0   | 32.81 |
| IPR003700 | 7 | 717 0 0  | 0 0 | 7 7 | 0 0 | 0 0 | 0 0   | 44.04 |
| IPR003726 | 7 | 917 5 1  | 0 0 | 4 0 | 0 0 | 0 0 | 6 2   | 26.78 |
| IPR003732 | 7 | 631 0 0  | 0 0 | 2 2 | 0 0 | 2 2 | 1 1   | 42.31 |
| IPR003776 | 7 | 359 8 8  | 0 0 | 0 0 | 0 0 | 0 0 | 0 0   | 14.08 |
| IPR003782 | 7 | 684 5 3  | 2 0 | 1 1 | 0 0 | 1 1 | 0 0   | 21.14 |
| IPR003816 | 7 | 377 7 6  | 1 0 | 0 0 | 0 0 | 0 0 | 0 0   | 20.92 |
| IPR003833 | 7 | 550 6 1  | 0 0 | 5 0 | 0 0 | 6 1 | 0 0   | 25.66 |
| IPR003846 | 7 | 464 1 1  | 0 0 | 0 0 | 0 0 | 1 1 | 5 5   | 34.9  |
| IPR003856 | 7 | 1223 9 9 | 0 0 | 0 0 | 0 0 | 0 0 | 0 0   | 8.5   |
| IPR003887 | 7 | 128 0 0  | 0 0 | 0 0 | 0 0 | 0 0 | 10 10 | 31.48 |
| IPR004030 | 7 | 129 6 3  | 2 0 | 1 1 | 0 0 | 4 1 | 0 0   | 51.02 |
| IPR004105 | 7 | 734 7 2  | 5 0 | 0 0 | 0 0 | 0 0 | 0 0   | 27.75 |
| IPR004152 | 7 | 249 0 0  | 0 0 | 2 0 | 0 0 | 6 3 | 4 1   | 15.57 |
| IPR004237 | 7 | 157 7 7  | 0 0 | 0 0 | 0 0 | 0 0 | 0 0   | 33.62 |
| IPR004262 | 7 | 357 6 5  | 0 0 | 1 0 | 1 0 | 0 0 | 2 1   | 20.77 |
| IPR004291 | 7 | 796 7 7  | 0 0 | 0 0 | 0 0 | 0 0 | 0 0   | 14.61 |
| IPR004299 | 7 | 862 2 2  | 0 0 | 1 1 | 0 0 | 5 5 | 0 0   | 12.15 |
| IPR004302 | 7 | 262 5 4  | 1 0 | 0 0 | 0 0 | 1 1 | 1 1   | 19.28 |
| IPR004305 | 7 | 599 4 3  | 0 0 | 0 0 | 0 0 | 4 3 | 0 0   | 10.37 |
| IPR004629 | 7 | 457 7 7  | 0 0 | 0 0 | 0 0 | 0 0 | 0 0   | 26.18 |
| IPR004695 | 7 | 456 0 0  | 0 0 | 2 2 | 0 0 | 2 2 | 0 0   | 12.05 |
| IPR004860 | 7 | 21 5 5   | 0 0 | 2 2 | 0 0 | 0 0 | 0 0   | 15.89 |
| IPR004867 | 7 | 62 5 2   | 0 0 | 2 0 | 0 0 | 0 0 | 5 2   | 37.66 |
| IPR004871 | 7 | 266 0 0  | 0 0 | 5 5 | 1 1 | 2 2 | 0 0   | 13.05 |
| IPR004883 | 7 | 330 0 0  | 0 0 | 7 7 | 0 0 | 0 0 | 0 0   | 36.59 |
| IPR004919 | 7 | 487 7 5  | 2 0 | 0 0 | 0 0 | 0 0 | 0 0   | 19.42 |
| IPR004948 | 7 | 60 2 2   | 0 0 | 1 1 | 0 0 | 0 0 | 4 4   | 20.51 |
| IPR005031 | 7 | 749 7 7  | 0 0 | 0 0 | 0 0 | 0 0 | 0 0   | 17.31 |
| IPR005101 | 7 | 946 2 0  | 2 0 | 5 4 | 2 1 | 1 0 | 1 0   | 23.32 |
| IPR005107 | 7 | 872 7 2  | 1 0 | 5 0 | 0 0 | 5 0 | 5 0   | 15.83 |
| IPR005108 | 7 | 77 0 0   | 0 0 | 4 2 | 0 0 | 0 0 | 5 3   | 44.68 |
| IPR005121 | 7 | 836 4 3  | 1 1 | 1 0 | 1 0 | 2 1 | 2 1   | 26.53 |
| IPR005146 | 7 | 1025 5 2 | 2 0 | 3 0 | 1 0 | 1 0 | 3 2   | 22.41 |
| IPR005195 | 7 | 308 5 2  | 1 0 | 3 1 | 1 0 | 1 0 | 1 1   | 26.07 |
| IPR005196 | 7 | 260 7 4  | 1 0 | 0 0 | 2 0 | 3 0 | 0 0   | 13.74 |
| IPR005357 | 7 | 559 7 7  | 0 0 | 0 0 | 0 0 | 0 0 | 0 0   | 23.88 |
| IPR005379 | 7 | 78 0 0   | 0 0 | 7 7 | 0 0 | 0 0 | 0 0   | 41.4  |
| IPR005380 | 7 | 89 0 0   | 0 0 | 8 8 | 0 0 | 0 0 | 0 0   | 24.71 |
| IPR005491 | 7 | 97 0 0   | 0 0 | 6 6 | 0 0 | 0 0 | 1 1   | 37.19 |
| IPR005533 | 7 | 31 0 0   | 0 0 | 0 0 | 0 0 | 7 7 | 0 0   | 36.54 |
| IPR005576 | 7 | 283 0 0  | 1 0 | 6 4 | 2 0 | 2 0 | 3 0   | 14.74 |
| IPR005580 | 7 | 662 7 5  | 2 0 | 1 0 | 0 0 | 0 0 | 1 0   | 20.51 |
| IPR006109 | 7 | 946 5 4  | 1 0 | 2 1 | 1 0 | 1 0 | 2 1   | 36.18 |
| IPR006124 | 7 | 1041 5 2 | 1 0 | 1 0 | 1 1 | 2 0 | 1 1   | 20.19 |
| IPR006170 | 7 | 419 0 0  | 0 0 | 0 0 | 0 0 | 0 0 | 8 8   | 5.18  |
| IPR006172 | 7 | 106 1 0  | 1 0 | 3 2 | 1 0 | 4 1 | 1 0   | 21.2  |
| IPR006527 | 7 | 254 0 0  | 0 0 | 7 7 | 0 0 | 0 0 | 0 0   | 20.19 |
| IPR006553 | 7 | 376 2 1  | 0 0 | 3 1 | 0 0 | 2 1 | 4 2   | 32.12 |
| IPR006571 | 7 | 232 0 0  | 0 0 | 0 0 | 1 0 | 1 1 | 5 4   | 23.59 |
| IPR006580 | 7 | 44 0 0   | 0 0 | 4 3 | 0 0 | 0 0 | 4 3   | 28.78 |
| IPR006586 | 7 | 215 0 0  | 0 0 | 0 0 | 0 0 | 2 0 | 7 5   | 28.79 |
| IPR006613 | 7 | 64 0 0   | 0 0 | 0 0 | 0 0 | 7 7 | 0 0   | 32.65 |
| IPR006615 | 7 | 202 0 0  | 0 0 | 5 2 | 0 0 | 2 0 | 5 2   | 20.3  |
| IPR006637 | 7 | 61 7 7   | 0 0 | 0 0 | 0 0 | 0 0 | 0 0   | 39.83 |
| IPR006641 | 7 | 1316 4 1 | 2 0 | 5 2 | 1 0 | 1 0 | 4 0   | 22.31 |
| IPR006702 | 7 | 276 0 0  | 0 0 | 7 7 | 0 0 | 0 0 | 0 0   | 14.01 |
| IPR006703 | 7 | 333 2 2  | 0 0 | 2 2 | 0 0 | 2 2 | 1 1   | 15.59 |
| IPR006805 | 7 | 1078 6 4 | 1 0 | 3 1 | 0 0 | 2 0 | 0 0   | 16.69 |
| IPR006845 | 7 | 196 0 0  | 0 0 | 4 2 | 1 0 | 3 2 | 3 1   | 8.63  |
| IPR006880 | 7 | 83 0 0   | 0 0 | 4 3 | 0 0 | 2 2 | 2 1   | 28.88 |
| IPR006912 | 7 | 208 0 0  | 0 0 | 9 9 | 0 0 | 0 0 | 0 0   | 22.05 |
| IPR007012 | 7 | 185 2 1  | 0 0 | 3 2 | 1 0 | 4 2 | 1 0   | 41.3  |
| IPR007160 | 7 | 206 6 4  | 0 0 | 3 1 | 0 0 | 0 0 | 0 0   | 36.98 |
| IPR007554 | 7 | 331 7 6  | 1 0 | 0 0 | 0 0 | 0 0 | 0 0   | 17.23 |
| IPR007634 | 7 | 513 7 6  | 0 0 | 0 0 | 0 0 | 0 0 | 1 0   | 42.75 |
| IPR007646 | 7 | 212 0 0  | 5 0 | 6 1 | 5 0 | 5 0 | 6 1   | 37.11 |
| IPR007698 | 7 | 1000 4 3 | 1 0 | 4 1 | 2 0 | 3 0 | 3 0   | 30.96 |
| IPR007842 | 7 | 336 3 3  | 3 3 | 0 0 | 0 0 | 0 0 | 1 1   | 10.83 |
| IPR007858 | 7 | 150 0 0  | 0 0 | 2 2 | 0 0 | 8 8 | 0 0   | 37.52 |
| IPR007894 | 7 | 81 7 7   | 0 0 | 0 0 | 0 0 | 0 0 | 0 0   | 40.92 |
| IPR007936 | 7 | 111 6 6  | 0 0 | 0 0 | 0 0 | 0 0 | 0 0   | 22.73 |
| IPR008006 | 7 | 33 7 7   | 0 0 | 0 0 | 0 0 | 0 0 | 0 0   | 38.38 |
| IPR008042 | 7 | 70 0 0   | 0 0 | 0 0 | 0 0 | 0 0 | 8 8   | 32.49 |
| IPR008044 | 7 | 27 8 8   | 0 0 | 0 0 | 0 0 | 0 0 | 0 0   | 20.51 |
| IPR008302 | 7 | 138 6 6  | 0 0 | 0 0 | 0 0 | 0 0 | 1 1   | 31.3  |
| IPR008424 | 7 | 65 0 0   | 0 0 | 0 0 | 0 0 | 0 0 | 7 7   | 23.56 |
| IPR008533 | 7 | 224 7 6  | 1 0 | 1 0 | 0 0 | 0 0 | 0 0   | 40.48 |
| IPR008557 | 7 | 304 6 6  | 1 1 | 0 0 | 0 0 | 0 0 | 0 0   | 24.95 |
| IPR008580 | 7 | 185 0 0  | 0 0 | 3 3 | 2 2 | 2 2 | 0 0   | 32.19 |
| IPR008635 | 7 | 1328 7 7 | 0 0 | 0 0 | 0 0 | 0 0 | 0 0   | 53.51 |
| IPR008727 | 7 | 484 7 7  | 0 0 | 0 0 | 0 0 | 0 0 | 0 0   | 33.95 |
| IPR008737 | 7 | 111 0 0  | 0 0 | 0 0 | 0 0 | 0 0 | 7 7   | 20    |
| IPR008902 | 7 | 225 5 4  | 1 0 | 0 0 | 0 0 | 3 2 | 0 0   | 14.93 |
| IPR009223 | 7 | 180 0 0  | 0 0 | 0 0 | 0 0 | 0 0 | 7 7   | 33.03 |
| IPR009270 | 7 | 119 7 7  | 0 0 | 0 0 | 0 0 | 0 0 | 0 0   | 19.64 |
| IPR009462 | 7 | 44 0 0   | 0 0 | 6 0 | 0 0 | 0 0 | 7 1   | 59.65 |
| IPR009721 | 7 | 210 2 1  | 0 0 | 5 4 | 1 0 | 1 0 | 1 0   | 15.97 |
| IPR009769 | 7 | 131 0 0  | 0 0 | 7 7 | 0 0 | 0 0 | 0 0   | 37.32 |
| IPR010176 | 7 | 365 8 8  | 0 0 | 0 0 | 0 0 | 0 0 | 0 0   | 45.23 |
| IPR010290 | 7 | 920 6 6  | 0 0 | 1 1 | 0 0 | 0 0 | 0 0   | 13.2  |
| IPR010347 | 7 | 119 0 0  | 0 0 | 3 3 | 0 0 | 2 2 | 3 3   | 21.53 |
| IPR010439 | 7 | 125 0 0  | 0 0 | 0 0 | 0 0 | 0 0 | 0 0   | 19.51 |
| IPR010509 | 7 | 452 4 2  | 0 0 | 5 3 | 1 0 | 2 0 | 3 1   | 17.4  |
| IPR010523 | 7 | 73 7 7   | 0 0 | 0 0 | 0 0 | 0 0 | 0 0   | 33.61 |
| IPR010524 | 7 | 121 7 7  | 0 0 | 0 0 | 0 0 | 0 0 | 0 0   | 29.77 |
| IPR010538 | 7 | 136 7 7  | 0 0 | 0 0 | 0 0 | 0 0 | 0 0   | 34.75 |
| IPR010652 | 7 | 424 4 4  | 0 0 | 3 2 | 0 0 | 0 0 | 1 0   | 38.26 |
| IPR010754 | 7 | 103 0 0  | 0 0 | 1 1 | 0 0 | 3 3 | 3 3   | 32.35 |
| IPR010817 | 7 | 300 7 7  | 0 0 | 0 0 | 0 0 | 0 0 | 0 0   | 15.26 |
| IPR011019 | 7 | 39 0 0   | 0 0 | 0 0 | 0 0 | 0 0 | 7 7   | 23.47 |
| IPR011079 | 7 | 922 7 6  | 1 0 | 0 0 | 1 0 | 0 0 | 0 0   | 33.36 |
| IPR011109 | 7 | 709 7 6  | 0 0 | 1 0 | 0 0 | 0 0 | 0 0   | 14.58 |
| IPR011261 | 7 | 187 1 1  | 0 0 | 5 5 | 0 0 | 0 0 | 1 1   | 28.08 |
| IPR011266 | 7 | 104 7 7  | 0 0 | 0 0 | 0 0 | 0 0 | 0 0   | 19.7  |
| IPR011451 | 7 | 21 7 7   | 0 0 | 0 0 | 0 0 | 0 0 | 0 0   | 23.67 |
| IPR011505 | 7 | 41 7 7   | 0 0 | 0 0 | 0 0 | 0 0 | 0 0   | 38.84 |
| IPR       |   |          |     |     |     |     |       |       |

|                |   |          |     |     |     |     |     |       |
|----------------|---|----------|-----|-----|-----|-----|-----|-------|
| IPRO11700      | 7 | 150 0 0  | 0 0 | 2 2 | 0 0 | 1 1 | 4 4 | 19.64 |
| IPRO12280      | 7 | 1570 3 0 | 1 0 | 5 3 | 0 0 | 4 1 | 0 0 | 19.19 |
| IPRO12495      | 7 | 598 7 7  | 0 0 | 0 0 | 0 0 | 0 0 | 0 0 | 19.52 |
| IPRO12669      | 7 | 28 7 7   | 0 0 | 0 0 | 0 0 | 0 0 | 0 0 | 28.17 |
| IPRO12946      | 7 | 446 0 0  | 0 0 | 4 4 | 0 0 | 3 3 | 0 0 | 36.13 |
| IPRO12957      | 7 | 42 0 0   | 0 0 | 6 0 | 0 0 | 0 0 | 7 1 | 77.1  |
| IPRO12958      | 7 | 28 0 0   | 0 0 | 0 0 | 0 0 | 7 0 | 7 7 | 60.26 |
| IPRO13049      | 7 | 134 0 0  | 1 1 | 3 3 | 0 0 | 1 1 | 2 2 | 23.97 |
| IPRO13102      | 7 | 440 5 3  | 0 0 | 0 0 | 4 2 | 0 0 | 2 0 | 26.03 |
| IPRO13137      | 7 | 292 1 1  | 3 1 | 3 1 | 3 0 | 5 2 | 3 0 | 34.76 |
| IPRO13168      | 7 | 15 7 7   | 0 0 | 0 0 | 0 0 | 0 0 | 0 0 | 44.18 |
| IPRO13212      | 7 | 116 0 0  | 0 0 | 3 2 | 0 0 | 2 1 | 4 3 | 29.23 |
| IPRO13237      | 7 | 86 7 7   | 0 0 | 0 0 | 0 0 | 0 0 | 0 0 | 56.53 |
| IPRO13342      | 7 | 1899 4 3 | 1 0 | 4 3 | 0 0 | 1 0 | 1 0 | 15.48 |
| IPRO13537      | 7 | 111 5 0  | 0 0 | 5 1 | 0 0 | 5 0 | 7 2 | 25    |
| IPRO13565      | 7 | 76 5 0   | 0 0 | 0 0 | 0 0 | 7 2 | 0 0 | 55    |
| IPRO13566      | 7 | 86 0 0   | 0 0 | 3 0 | 0 0 | 5 2 | 6 2 | 39.86 |
| IPRO13568      | 7 | 67 4 4   | 0 0 | 0 0 | 0 0 | 0 0 | 3 3 | 13.88 |
| IPRO13591      | 7 | 145 0 0  | 0 0 | 8 8 | 0 0 | 0 0 | 0 0 | 52.36 |
| IPRO13618      | 7 | 86 5 1   | 0 0 | 0 0 | 0 0 | 0 0 | 6 2 | 35.6  |
| IPRO13691      | 7 | 146 7 5  | 1 0 | 1 0 | 0 0 | 0 0 | 0 0 | 22.43 |
| IPRO13716      | 7 | 19 0 0   | 0 0 | 0 0 | 0 0 | 5 5 | 0 0 | 32.43 |
| IPRO13748      | 7 | 298 0 0  | 4 2 | 2 0 | 1 0 | 4 2 | 3 1 | 16.29 |
| IPRO13752      | 7 | 864 3 2  | 1 0 | 2 1 | 0 0 | 4 3 | 0 0 | 15.05 |
| IPRO13849      | 7 | 744 7 6  | 1 0 | 0 0 | 0 0 | 0 0 | 0 0 | 28.38 |
| IPRO13857      | 7 | 199 4 3  | 0 0 | 2 1 | 0 0 | 0 0 | 2 2 | 19.85 |
| IPRO13917      | 7 | 123 1 1  | 0 0 | 5 1 | 1 0 | 3 1 | 2 0 | 24.96 |
| IPRO13995      | 7 | 168 0 0  | 0 0 | 0 0 | 0 0 | 2 2 | 5 5 | 31.34 |
| IPRO14787      | 7 | 36 7 7   | 0 0 | 0 0 | 0 0 | 0 0 | 0 0 | 40.34 |
| IPRO14808      | 7 | 73 0 0   | 3 2 | 1 0 | 0 0 | 3 0 | 3 1 | 25.57 |
| IPRO14820      | 7 | 102 7 4  | 3 0 | 0 0 | 0 0 | 0 0 | 0 0 | 13.77 |
| IPRO14837      | 7 | 130 0 0  | 0 0 | 0 0 | 0 0 | 3 1 | 5 3 | 46.33 |
| IPRO14878      | 7 | 127 0 0  | 0 0 | 0 0 | 0 0 | 0 0 | 7 7 | 22.53 |
| IPRO14895      | 7 | 81 7 7   | 0 0 | 0 0 | 0 0 | 0 0 | 0 0 | 17.59 |
| IPRO15015      | 7 | 34 0 0   | 0 0 | 0 0 | 0 0 | 0 0 | 7 7 | 43.79 |
| IPRO15163      | 7 | 216 1 1  | 4 1 | 4 1 | 0 0 | 2 0 | 3 1 | 13.5  |
| IPRO15191      | 7 | 222 4 8  | 0 0 | 0 0 | 0 0 | 0 0 | 0 0 | 29.2  |
| IPRO15256      | 7 | 143 0 0  | 1 0 | 4 2 | 2 0 | 1 1 | 6 4 | 52.62 |
| IPRO15289      | 7 | 29 6 5   | 0 0 | 0 0 | 0 0 | 2 1 | 0 0 | 59.73 |
| IPRO15342      | 7 | 61 0 0   | 0 0 | 3 1 | 1 0 | 2 0 | 4 2 | 35.79 |
| IPRO15390      | 7 | 113 0 0  | 0 0 | 0 0 | 0 0 | 0 0 | 7 7 | 38.17 |
| IPRO15415      | 7 | 285 0 0  | 4 0 | 4 1 | 3 1 | 5 0 | 5 0 | 27.33 |
| IPRO15848      | 7 | 771 6 0  | 2 0 | 7 1 | 0 0 | 0 0 | 6 0 | 22.39 |
| IPRO15866      | 7 | 949 3 1  | 1 0 | 4 2 | 1 0 | 4 2 | 2 0 | 21.68 |
| IPRO16061      | 7 | 254 2 0  | 2 0 | 2 0 | 3 0 | 3 0 | 6 4 | 26.64 |
| IPRO17456      | 7 | 937 1 0  | 1 0 | 4 3 | 1 0 | 2 1 | 3 2 | 58.25 |
| IPRO17884      | 7 | 28 0 0   | 0 0 | 0 0 | 0 0 | 5 4 | 4 3 | 27.86 |
| IPRO18004      | 7 | 1131 3 3 | 0 0 | 0 0 | 0 0 | 5 5 | 0 0 | 15.7  |
| IPRO18205      | 7 | 225 0 0  | 0 0 | 1 0 | 0 0 | 6 1 | 6 1 | 31.28 |
| IPRO18325      | 7 | 97 0 0   | 0 0 | 1 0 | 3 0 | 3 2 | 3 0 | 21.38 |
| IPRO18326      | 7 | 98 0 0   | 0 0 | 5 1 | 3 0 | 6 2 | 3 0 | 33.4  |
| IPRO18327      | 7 | 95 0 0   | 0 0 | 5 1 | 3 0 | 6 2 | 3 0 | 28.38 |
| IPRO18328      | 7 | 97 0 0   | 0 0 | 5 1 | 3 0 | 6 2 | 3 0 | 40.97 |
| IPRO18704      | 7 | 306 7 7  | 0 0 | 0 0 | 0 0 | 0 0 | 0 0 | 25.04 |
| IPRO18720      | 7 | 147 4 4  | 3 3 | 0 0 | 0 0 | 0 0 | 0 0 | 23.45 |
| IPRO18769      | 7 | 301 7 7  | 0 0 | 0 0 | 0 0 | 0 0 | 0 0 | 22.88 |
| IPRO18773      | 7 | 77 7 7   | 0 0 | 0 0 | 0 0 | 0 0 | 0 0 | 20.53 |
| IPRO18866      | 7 | 88 0 0   | 0 0 | 7 6 | 0 0 | 2 1 | 0 0 | 35.45 |
| IPRO18948      | 7 | 744 2 1  | 0 0 | 3 2 | 1 0 | 1 0 | 4 3 | 41.29 |
| IPRO18958      | 7 | 447 4 4  | 0 0 | 0 0 | 0 0 | 0 0 | 2 2 | 14.44 |
| IPRO19023      | 7 | 9 0 0    | 0 0 | 6 6 | 0 0 | 2 2 | 2 2 | 46.74 |
| IPRO19104      | 7 | 207 7 7  | 0 0 | 0 0 | 0 0 | 0 0 | 0 0 | 21.67 |
| IPRO19180      | 7 | 105 0 0  | 0 0 | 0 0 | 0 0 | 5 5 | 2 2 | 34.15 |
| IPRO19236      | 7 | 121 3 3  | 0 0 | 0 0 | 0 0 | 4 4 | 0 0 | 30.98 |
| IPRO19409      | 7 | 47 0 0   | 0 0 | 0 0 | 0 0 | 6 3 | 4 1 | 27.08 |
| IPRO19441      | 7 | 81 0 0   | 0 0 | 1 0 | 0 0 | 6 3 | 4 1 | 30.14 |
| IPRO19449      | 7 | 44 1 1   | 0 0 | 6 6 | 0 0 | 6 6 | 0 0 | 23.31 |
| IPRO19474      | 7 | 109 0 0  | 0 0 | 4 3 | 2 1 | 3 2 | 1 0 | 26.97 |
| IPRO19545      | 7 | 97 0 0   | 1 1 | 3 2 | 0 0 | 0 0 | 3 2 | 23.01 |
| IPRO19551      | 7 | 435 7 5  | 0 0 | 2 0 | 0 0 | 0 0 | 0 0 | 30.83 |
| IPRO19556      | 7 | 424 7 7  | 0 0 | 0 0 | 0 0 | 0 0 | 0 0 | 31.95 |
| IPRO19606      | 7 | 284 7 7  | 0 0 | 0 0 | 0 0 | 0 0 | 0 0 | 11.8  |
| IPRO19614      | 7 | 742 6 5  | 1 0 | 2 1 | 1 0 | 0 0 | 0 0 | 22.91 |
| IPRO20097      | 7 | 2040 0 0 | 0 0 | 4 4 | 0 0 | 1 1 | 2 2 | 16.81 |
| IPRO20828      | 7 | 1558 4 3 | 1 0 | 4 3 | 1 0 | 1 0 | 1 0 | 40.09 |
| IPRO20865      | 7 | 112 1 1  | 0 0 | 0 0 | 0 0 | 0 0 | 6 6 | 15.1  |
| IPRO21099      | 7 | 125 0 0  | 0 0 | 7 7 | 0 0 | 0 0 | 0 0 | 24.66 |
| IPRO21130      | 7 | 666 4 2  | 1 0 | 2 1 | 0 0 | 3 2 | 1 0 | 32.45 |
| IPRO21315      | 7 | 116 7 7  | 0 0 | 0 0 | 0 0 | 0 0 | 0 0 | 10.98 |
| IPRO21833      | 7 | 120 0 0  | 0 0 | 0 0 | 0 0 | 7 7 | 0 0 | 22.51 |
| IPRO21860      | 7 | 155 6 5  | 1 0 | 0 0 | 0 0 | 2 1 | 0 0 | 9.71  |
| IPRO22092      | 7 | 59 2 2   | 0 0 | 1 0 | 0 0 | 3 2 | 1 0 | 27.75 |
| IPRO22126      | 7 | 18 0 0   | 0 0 | 7 7 | 0 0 | 0 0 | 0 0 | 39.83 |
| IPRO22233      | 7 | 40 0 0   | 0 0 | 2 2 | 0 0 | 5 5 | 0 0 | 41.07 |
| MF_00316       | 7 | 390 7 7  | 0 0 | 0 0 | 0 0 | 0 0 | 0 0 | 22.66 |
| PF02345        | 7 | 46 0 0   | 0 0 | 0 0 | 0 0 | 0 0 | 7 7 | 65.68 |
| PF03138        | 7 | 120 0 0  | 0 0 | 7 7 | 0 0 | 0 0 | 0 0 | 37.1  |
| PF04755        | 7 | 181 0 0  | 0 0 | 7 7 | 0 0 | 0 0 | 0 0 | 18.98 |
| PF06010        | 7 | 5 0 0    | 0 0 | 4 2 | 0 0 | 0 0 | 5 3 | 45.79 |
| PF06488        | 7 | 129 4 4  | 0 0 | 0 0 | 0 0 | 0 0 | 3 3 | 29.58 |
| PF11187        | 7 | 93 7 7   | 0 0 | 0 0 | 0 0 | 0 0 | 0 0 | 18.25 |
| PF11783        | 7 | 71 7 7   | 0 0 | 0 0 | 0 0 | 0 0 | 0 0 | 31.33 |
| PF11789        | 7 | 103 0 0  | 0 0 | 1 1 | 0 0 | 4 4 | 2 2 | 34.09 |
| PF11865        | 7 | 85 0 0   | 0 0 | 5 0 | 5 1 | 6 1 | 4 0 | 37.18 |
| PF11898        | 7 | 288 7 7  | 0 0 | 0 0 | 0 0 | 0 0 | 0 0 | 31.71 |
| PF11930        | 7 | 1128 7 6 | 1 0 | 1 0 | 1 0 | 1 0 | 1 0 | 31.61 |
| PF11969        | 7 | 196 1 0  | 1 0 | 4 4 | 0 0 | 0 0 | 2 2 | 24.2  |
| PF12047        | 7 | 85 0 0   | 0 0 | 5 3 | 0 0 | 2 0 | 4 2 | 17.32 |
| PF12054        | 7 | 65 0 0   | 0 0 | 4 0 | 0 0 | 7 3 | 4 0 | 23.12 |
| PF12409        | 7 | 76 0 0   | 0 0 | 0 0 | 1 0 | 6 2 | 5 1 | 20.52 |
| PF12468        | 7 | 84 8 8   | 0 0 | 0 0 | 0 0 | 0 0 | 0 0 | 26.04 |
| PF12515        | 7 | 67 0 0   | 0 0 | 0 0 | 0 0 | 7 7 | 0 0 | 50.05 |
| PTHR10098-SF14 | 7 | 10 7 6   | 0 0 | 0 0 | 0 0 | 1 0 | 0 0 | 10.12 |
| PTHR10588-SF23 | 7 | 30 2 2   | 0 0 | 1 1 | 0 0 | 0 0 | 3 3 | 17.82 |
| PTHR21666      | 7 | 16 5 5   | 0 0 | 0 0 | 0 0 | 1 1 | 0 0 | 16.87 |
| PTHR23022      | 7 | 75 2 2   | 1 0 | 0 0 | 0 0 | 2 1 | 4 2 | 25.93 |
| PTHR23083-SF18 | 7 | 43 6 6   | 0 0 | 0 0 | 0 0 | 0 0 | 1 1 | 11.22 |
| PTHR23283      | 7 | 36 5 5   | 0 0 | 1 1 | 0 0 | 0 0 | 0 0 | 2.26  |
| PTHR23416-SF7  | 7 | 574 6 3  | 2 0 | 2 0 | 0 0 | 3 1 | 0 0 | 35.82 |
| TIGR01954      | 7 | 564 7 7  | 0 0 | 0 0 | 0 0 | 0 0 | 0 0 | 37.58 |
| TIGR02608      | 7 | 102 7 7  | 0 0 | 0 0 | 0 0 | 0 0 | 0 0 | 32.11 |
| IPRO00031      | 8 | 1004 5 4 | 1 1 | 1 0 | 0 0 | 2 1 | 1 1 | 39.93 |
| IPRO00101      | 8 | 1089 2 2 | 0 0 | 3 3 | 0 0 | 2 2 | 2 2 | 24.05 |
| IPRO00183      | 8 | 3200 6 6 | 0 0 | 0 0 | 1 1 | 0 0 | 0 0 | 10.55 |
| IPRO00556      | 8 | 22 8 8   | 0 0 | 0 0 | 0 0 | 0 0 | 0 0 | 58.88 |
| IPRO00649      | 8 | 725 1 0  | 1 0 | 4 4 | 0 0 | 3 2 | 0 0 | 24.09 |
| IPRO00674      | 8 | 1202 9 4 | 1 0 | 5 0 | 0 0 | 5 0 | 5 0 | 26.63 |
| IPRO00684      | 8 | 619 0 0  | 0 0 | 5 0 | 5 0 | 6 1 | 7 2 | 67.43 |
| IPRO00685      | 8 | 298 1 0  | 1 0 | 9 8 | 0 0 | 0 0 | 0 0 | 24.99 |
| IPRO00840      | 8 | 26 0 0   | 0 0 | 0 0 | 0 0 | 0 0 | 9 9 | 50    |
| IPRO00843      | 8 | 4456 8 8 | 0 0 | 0 0 | 0 0 | 0 0 | 0 0 | 35.01 |
| IPRO01135      | 8 | 1168 3 1 | 2 0 | 3 3 | 0 0 | 1 1 | 1 1 | 25.38 |
| IPRO01158      | 8 | 109 0 0  | 0 0 | 0 0 | 1 1 | 0 0 | 7 7 | 40.56 |
| IPRO01222      | 8 | 392 0 0  | 1 0 | 5 0 | 4 1 | 6 1 | 6 1 | 42.33 |
| IPRO01228      | 8 | 913 6 4  | 0 0 | 0 0 | 0 0 | 2 1 | 1 1 | 22.01 |
| IPRO01241      | 8 | 1410 5 4 | 0 0 | 2 0 | 1 0 | 2 1 | 1 0 | 41.94 |
| IPRO01269      | 8 | 1592 1 1 | 1 1 | 2 1 | 0 0 | 2 1 | 3 3 | 22.45 |
| IPRO01322      | 8 | 116 4 3  | 4 3 | 0 0 | 0 0 | 0 0 | 1 1 | 30.04 |
| IPRO01333      | 8 | 245 0 0  | 0 0 | 8 8 | 0 0 | 0 0 | 0 0 | 32.38 |
| IPRO01381      | 8 | 310 4 0  | 3 0 | 2 0 | 0 0 | 7 4 | 0 0 | 17.69 |
| IPRO01498      | 8 | 588 2 1  | 0 0 | 7 5 | 1 0 | 1 0 | 0 0 | 38.91 |
| IPRO01538      | 8 | 652 8 6  | 2 0 | 0 0 | 0 0 | 1 0 | 0 0 | 41.88 |
| IPRO01564      | 8 | 1074 0 0 | 0 0 | 3 2 | 1 0 | 0 0 | 5 4 | 39.58 |
| IPRO01574      | 8 | 135 0 0  | 0 0 | 8 8 | 0 0 | 0 0 | 0 0 | 10.26 |
| IPRO01578      | 8 | 296 0 0  | 0 0 | 5 5 | 0 0 | 2 2 | 1 1 | 26.47 |
| IPRO01670      | 8 | 2125 3 2 | 0 0 | 1 0 | 0 0 | 3 3 | 2 2 | 19.35 |
| IPRO01754      | 8 | 1126 2 1 | 0 0 | 3 3 | 1 1 | 1 0 | 1 0 | 15.2  |
| IPRO01766      | 8 | 889 0 0  | 0 0 | 0 0 | 0 0 | 1 0 | 7 6 | 34.48 |
| IPRO01830      | 8 | 597 3 2  | 1 0 | 5 4 | 2 1 | 1 0 | 1 0 | 29.89 |
| IPRO01898      | 8 | 862 5 5  | 0 0 | 1 0 | 1 0 | 2 1 | 1 1 | 15.52 |
| IPRO02088      | 8 | 802 0 0  | 3 3 | 3 1 | 0 0 | 0 0 | 4 2 | 20.51 |
| IPRO02108      | 8 | 526 0 0  | 0 0 | 1 1 | 0 0 | 3 2 | 5 4 | 13.16 |
| IPRO02205      | 8 | 1466 5 4 | 1 0 | 2 0 | 1 0 | 1 1 | 2 0 | 43.54 |
| IPRO02220      | 8 | 1969 2 2 | 0 0 | 1 1 | 0 0 | 4 4 | 1 1 | 19.68 |
| IPRO02505      | 8 | 1112 8 5 | 2 0 | 1 0 | 0 0 | 0 0 | 0 0 | 26.92 |
| IPRO02658      | 8 | 926 4 3  | 0 0 | 0 0 | 0 0 | 5 4 | 0 0 | 27.65 |
| IPRO02717      | 8 | 284 0 0  | 0 0 | 3 1 | 1 0 | 4 1 | 6 3 | 44.03 |

|           |   |          |     |       |     |     |       |        |
|-----------|---|----------|-----|-------|-----|-----|-------|--------|
| IPR002734 | 8 | 1553 4 3 | 2 1 | 3 2   | 0 0 | 0 0 | 0 0   | 15.05  |
| IPR002797 | 8 | 1789 9 7 | 4 2 | 0 0   | 0 0 | 0 0 | 0 0   | 1.47   |
| IPR002820 | 8 | 683 4 4  | 0 0 | 3 1   | 0 0 | 3 0 | 3 0   | 46.27  |
| IPR002871 | 8 | 931 7 7  | 0 0 | 1 1   | 0 0 | 0 0 | 0 0   | 31.40  |
| IPR002888 | 8 | 1379 8 3 | 1 0 | 5 0   | 0 0 | 5 0 | 5 0   | 42.95  |
| IPR002951 | 8 | 30 2 2   | 0 0 | 0 0   | 0 0 | 0 0 | 4 4   | 53.61  |
| IPR003101 | 8 | 44 0 0   | 0 0 | 1 1   | 0 0 | 0 0 | 6 6   | 47.78  |
| IPR003108 | 8 | 108 0 0  | 0 0 | 0 0   | 0 0 | 1 1 | 7 7   | 58.5   |
| IPR003109 | 8 | 242 0 0  | 0 0 | 0 0   | 0 0 | 0 0 | 8 8   | 47.165 |
| IPR003153 | 8 | 49 0 0   | 0 0 | 0 0   | 0 0 | 0 0 | 6 6   | 65.28  |
| IPR003165 | 8 | 463 0 0  | 0 0 | 6 4   | 0 0 | 2 0 | 5 3   | 26.24  |
| IPR003200 | 8 | 487 8 8  | 0 0 | 0 0   | 0 0 | 0 0 | 0 0   | 26.95  |
| IPR003346 | 8 | 1485 8 7 | 1 0 | 0 0   | 0 0 | 0 0 | 0 0   | 19.19  |
| IPR003382 | 8 | 1489 3 2 | 3 2 | 2 1   | 0 0 | 2 2 | 0 0   | 24.5   |
| IPR003385 | 8 | 537 8 7  | 0 0 | 1 0   | 0 0 | 0 0 | 0 0   | 23.98  |
| IPR003397 | 8 | 493 0 0  | 0 0 | 6 6   | 0 0 | 2 2 | 0 0   | 13.23  |
| IPR003583 | 8 | 54 7 7   | 1 1 | 0 0   | 0 0 | 0 0 | 0 0   | 70.64  |
| IPR003617 | 8 | 99 0 0   | 0 0 | 5 2   | 0 0 | 2 0 | 6 3   | 31.02  |
| IPR003754 | 8 | 888 6 5  | 1 0 | 1 1   | 0 0 | 0 0 | 1 1   | 9.98   |
| IPR004102 | 8 | 104 0 0  | 0 0 | 7 2   | 2 0 | 3 0 | 6 1   | 33.14  |
| IPR004112 | 8 | 1618 8 7 | 1 0 | 1 0   | 1 0 | 1 0 | 1 0   | 21.48  |
| IPR004114 | 8 | 868 7 4  | 4 1 | 1 0   | 0 0 | 0 0 | 1 0   | 11.46  |
| IPR004117 | 8 | 1109 0 0 | 0 0 | 0 0   | 0 0 | 0 0 | 8 8   | 5.64   |
| IPR004167 | 8 | 1754 7 5 | 2 0 | 3 1   | 2 0 | 2 0 | 2 0   | 39.34  |
| IPR004185 | 8 | 148 8 7  | 1 0 | 0 0   | 0 0 | 0 0 | 0 0   | 21.49  |
| IPR004198 | 8 | 126 0 0  | 0 0 | 8 2   | 1 0 | 6 0 | 6 0   | 30.94  |
| IPR004199 | 8 | 252 6 3  | 0 0 | 1 2   | 0 0 | 0 0 | 0 0   | 21.86  |
| IPR004210 | 8 | 370 0 0  | 0 0 | 0 0   | 0 0 | 0 0 | 8 8   | 19.6   |
| IPR004253 | 8 | 429 0 0  | 0 0 | 8 8   | 0 0 | 0 0 | 0 0   | 30.37  |
| IPR004255 | 8 | 393 4 3  | 1 0 | 5 4   | 0 0 | 1 0 | 1 0   | 16.77  |
| IPR004343 | 8 | 82 1 1   | 0 0 | 5 5   | 2 2 | 0 0 | 0 0   | 18.7   |
| IPR004344 | 8 | 408 1 1  | 0 0 | 1 1   | 2 2 | 3 3 | 3 3   | 21.62  |
| IPR004367 | 8 | 313 0 0  | 0 0 | 3 1   | 1 0 | 2 2 | 4 2   | 6.34   |
| IPR004398 | 8 | 821 7 7  | 0 0 | 1 1   | 0 0 | 0 0 | 0 0   | 25.38  |
| IPR004720 | 8 | 440 3 3  | 0 0 | 5 5   | 0 0 | 0 0 | 0 0   | 29.33  |
| IPR004850 | 8 | 7 0 0    | 0 0 | 0 0   | 0 0 | 0 0 | 8 8   | 37.82  |
| IPR004852 | 8 | 454 8 7  | 1 0 | 0 0   | 0 0 | 0 0 | 0 0   | 29.67  |
| IPR004881 | 8 | 792 3 2  | 0 0 | 2 1   | 2 2 | 3 1 | 1 0   | 26.02  |
| IPR005085 | 8 | 42 4 4   | 1 1 | 3 3   | 0 0 | 0 0 | 0 0   | 24.73  |
| IPR005111 | 8 | 991 3 1  | 2 0 | 4 2   | 0 0 | 5 3 | 2 0   | 14.43  |
| IPR005114 | 8 | 87 7 7   | 0 0 | 1 1   | 0 0 | 0 0 | 0 0   | 18.37  |
| IPR005116 | 8 | 1240 8 6 | 2 0 | 0 0   | 0 0 | 0 0 | 0 0   | 19.3   |
| IPR005126 | 8 | 425 8 8  | 0 0 | 0 0   | 0 0 | 0 0 | 0 0   | 22.99  |
| IPR005170 | 8 | 1982 6 4 | 2 0 | 3 1   | 0 0 | 2 0 | 0 0   | 19.22  |
| IPR005200 | 8 | 72 7 7   | 0 0 | 1 1   | 0 0 | 1 1 | 0 0   | 24.7   |
| IPR005303 | 8 | 417 7 6  | 1 0 | 2 0   | 0 0 | 2 0 | 2 0   | 19.61  |
| IPR005311 | 8 | 1664 4 4 | 0 0 | 4 4   | 0 0 | 0 0 | 0 0   | 19.95  |
| IPR005314 | 8 | 105 0 0  | 0 0 | 7 7   | 0 0 | 1 1 | 0 0   | 20.82  |
| IPR005913 | 8 | 859 4 4  | 0 0 | 1 1   | 0 0 | 3 3 | 0 0   | 22.19  |
| IPR006062 | 8 | 1505 6 4 | 0 0 | 1 0   | 0 0 | 1 0 | 4 2   | 29.71  |
| IPR006336 | 8 | 506 5 5  | 0 0 | 3 3   | 0 0 | 0 0 | 0 0   | 14.05  |
| IPR006562 | 8 | 103 0 0  | 0 0 | 4 1   | 0 0 | 6 0 | 6 1   | 16.8   |
| IPR006567 | 8 | 76 0 0   | 0 0 | 4 2   | 2 1 | 0 0 | 4 3   | 36.89  |
| IPR006614 | 8 | 77 0 0   | 0 0 | 0 0   | 0 0 | 1 1 | 7 7   | 34.87  |
| IPR006629 | 8 | 256 0 0  | 0 0 | 2 2   | 0 0 | 1 1 | 6 6   | 23.48  |
| IPR006740 | 8 | 109 0 0  | 0 0 | 6 6   | 0 0 | 0 0 | 0 0   | 36.1   |
| IPR006863 | 8 | 189 2 2  | 0 0 | 3 2   | 0 0 | 2 2 | 2 1   | 29.71  |
| IPR006895 | 8 | 360 0 0  | 0 0 | 4 0   | 4 0 | 7 3 | 4 0   | 33.29  |
| IPR007037 | 8 | 363 8 7  | 0 0 | 1 0   | 0 0 | 0 0 | 0 0   | 24.96  |
| IPR007127 | 8 | 624 8 8  | 0 0 | 0 0   | 0 0 | 0 0 | 0 0   | 25.45  |
| IPR007159 | 8 | 1035 7 7 | 0 0 | 2 2   | 0 0 | 0 0 | 0 0   | 14.8   |
| IPR007222 | 8 | 76 0 0   | 0 0 | 4 2   | 2 0 | 5 3 | 2 0   | 21.98  |
| IPR007234 | 8 | 95 0 0   | 0 0 | 4 4   | 0 0 | 3 3 | 1 1   | 33.91  |
| IPR007303 | 8 | 68 0 0   | 0 0 | 3 3   | 1 1 | 4 4 | 0 0   | 41.57  |
| IPR007324 | 8 | 542 8 8  | 0 0 | 0 0   | 0 0 | 0 0 | 0 0   | 17.86  |
| IPR007345 | 8 | 384 8 8  | 0 0 | 0 0   | 0 0 | 0 0 | 0 0   | 7.11   |
| IPR007434 | 8 | 279 3 3  | 0 0 | 5 5   | 0 0 | 0 0 | 0 0   | 19.13  |
| IPR007512 | 8 | 84 0 0   | 0 0 | 3 3   | 0 0 | 0 0 | 5 5   | 34.02  |
| IPR007525 | 8 | 196 5 2  | 6 3 | 1 0   | 0 0 | 0 0 | 0 0   | 13.9   |
| IPR007647 | 8 | 264 0 0  | 5 0 | 6 1   | 5 0 | 6 0 | 7 1   | 35.07  |
| IPR007833 | 8 | 298 8 8  | 0 0 | 0 0   | 0 0 | 0 0 | 0 0   | 12.24  |
| IPR008136 | 8 | 780 6 6  | 0 0 | 0 0   | 0 0 | 3 3 | 0 0   | 30.32  |
| IPR008139 | 8 | 595 0 0  | 0 0 | 1 1   | 0 0 | 1 1 | 7 7   | 15.86  |
| IPR008273 | 8 | 569 0 0  | 0 0 | 4 2   | 2 0 | 2 1 | 5 3   | 21.93  |
| IPR008410 | 8 | 93 8 8   | 0 0 | 0 0   | 0 0 | 0 0 | 0 0   | 41.85  |
| IPR008616 | 8 | 417 2 1  | 4 3 | 3 1   | 2 0 | 3 1 | 2 0   | 12.06  |
| IPR008824 | 8 | 118 8 6  | 1 0 | 1 0   | 0 0 | 1 0 | 1 0   | 27.06  |
| IPR009076 | 8 | 98 0 0   | 0 0 | 5 0   | 5 1 | 6 1 | 4 0   | 46.55  |
| IPR009254 | 8 | 54 0 0   | 0 0 | 0 0   | 0 0 | 0 0 | 8 8   | 13.69  |
| IPR009647 | 8 | 225 4 2  | 0 0 | 6 4   | 0 0 | 0 0 | 0 0   | 12.43  |
| IPR010280 | 8 | 1197 6 3 | 3 0 | 2 1   | 0 0 | 1 0 | 1 0   | 25.85  |
| IPR010303 | 8 | 30 0 0   | 0 0 | 0 0   | 0 0 | 0 0 | 7 7   | 69.75  |
| IPR010307 | 8 | 61 0 0   | 0 0 | 0 0   | 0 0 | 0 0 | 8 8   | 17.4   |
| IPR010472 | 8 | 186 0 0  | 0 0 | 0 0   | 0 0 | 4 0 | 8 4   | 19     |
| IPR010614 | 8 | 305 9 5  | 3 0 | 1 0   | 1 0 | 2 0 | 1 0   | 17.57  |
| IPR010658 | 8 | 175 0 0  | 0 0 | 8 8   | 0 0 | 0 0 | 0 0   | 28.42  |
| IPR010743 | 8 | 175 7 7  | 1 1 | 0 0   | 0 0 | 0 0 | 0 0   | 33.04  |
| IPR010810 | 8 | 561 7 3  | 0 0 | 5 1   | 0 0 | 0 0 | 0 0   | 19.81  |
| IPR010819 | 8 | 357 8 6  | 2 0 | 0 0   | 0 0 | 0 0 | 1 0   | 9.76   |
| IPR010926 | 8 | 151 0 0  | 0 0 | 0 0   | 5 4 | 3 1 | 3 1   | 17.78  |
| IPR011021 | 8 | 574 0 0  | 0 0 | 1 0   | 0 0 | 1 0 | 6 5   | 14.72  |
| IPR011127 | 8 | 930 8 7  | 0 0 | 1 0   | 0 0 | 0 0 | 0 0   | 35.92  |
| IPR011128 | 8 | 1019 6 4 | 1 0 | 2 1   | 1 0 | 2 0 | 3 1   | 23.95  |
| IPR011496 | 8 | 74 5 5   | 0 0 | 0 0   | 0 0 | 0 0 | 3 3   | 35.28  |
| IPR011519 | 8 | 151 7 6  | 0 0 | 0 0   | 0 0 | 0 0 | 2 1   | 21.95  |
| IPR011546 | 8 | 1230 3 1 | 0 0 | 2 0   | 2 0 | 4 2 | 19.71 | 19.71  |
| IPR011619 | 8 | 791 7 4  | 3 0 | 0 0   | 1 1 | 0 0 | 0 0   | 21.06  |
| IPR011642 | 8 | 2564 7 2 | 3 0 | 0 0   | 0 0 | 2 0 | 3 1   | 8.52   |
| IPR011647 | 8 | 206 8 8  | 0 0 | 0 0   | 0 0 | 0 0 | 0 0   | 50.81  |
| IPR011651 | 8 | 90 0 0   | 0 0 | 0 0   | 0 0 | 0 0 | 8 8   | 41.98  |
| IPR012302 | 8 | 1260 4 2 | 2 0 | 2 1   | 1 0 | 1 0 | 4 3   | 35.49  |
| IPR012569 | 8 | 112 8 8  | 0 0 | 0 0   | 0 0 | 0 0 | 0 0   | 51.22  |
| IPR012591 | 8 | 80 0 0   | 0 0 | 8 1   | 7 0 | 7 0 | 7 0   | 76.91  |
| IPR012592 | 8 | 82 0 0   | 0 0 | 8 1   | 7 0 | 7 0 | 7 0   | 76.78  |
| IPR012706 | 8 | 47 9 9   | 0 0 | 0 0   | 0 0 | 0 0 | 0 0   | 27.98  |
| IPR012816 | 8 | 188 2 2  | 0 0 | 2 2   | 1 1 | 4 4 | 0 0   | 24.99  |
| IPR012912 | 8 | 1397 7 7 | 0 0 | 0 0   | 0 0 | 1 1 | 0 0   | 21.69  |
| IPR012984 | 8 | 82 0 0   | 0 0 | 7 0   | 7 0 | 7 0 | 7 0   | 54.22  |
| IPR013079 | 8 | 236 1 0  | 0 0 | 2 1   | 2 1 | 3 2 | 1 0   | 33.94  |
| IPR013132 | 8 | 317 7 5  | 2 0 | 0 0   | 0 0 | 0 0 | 2 1   | 32     |
| IPR013529 | 8 | 245 8 6  | 1 0 | 0 0   | 0 0 | 2 0 | 0 0   | 21.7   |
| IPR013546 | 8 | 1121 8 7 | 0 0 | 0 0   | 0 0 | 0 0 | 1 0   | 14.3   |
| IPR013567 | 8 | 87 0 0   | 0 0 | 3 1   | 0 0 | 5 2 | 6 3   | 46.62  |
| IPR013637 | 8 | 98 1 1   | 0 0 | 6 0   | 0 0 | 7 1 | 6 0   | 18.68  |
| IPR013698 | 8 | 103 1 0  | 0 0 | 5 2   | 0 0 | 5 1 | 3 1   | 43.37  |
| IPR013736 | 8 | 444 5 4  | 1 0 | 1 1   | 1 0 | 2 1 | 1 0   | 10.44  |
| IPR013749 | 8 | 1313 4 1 | 1 0 | 2 1   | 0 0 | 4 3 | 0 0   | 24.53  |
| IPR013751 | 8 | 1304 8 6 | 1 0 | 1 0   | 1 0 | 1 0 | 0 0   | 30.65  |
| IPR013993 | 8 | 69 0 0   | 0 0 | 0 3   | 0 0 | 3 2 | 7 6   | 40.04  |
| IPR013999 | 8 | 64 0 0   | 0 0 | 0 0   | 0 0 | 1 0 | 6 3   | 41.89  |
| IPR014002 | 8 | 216 0 0  | 0 0 | 9 9   | 0 0 | 0 0 | 0 0   | 13.86  |
| IPR014741 | 8 | 49 0 0   | 0 0 | 0 0   | 0 0 | 0 0 | 6 6   | 67.89  |
| IPR014819 | 8 | 61 9 9   | 0 0 | 0 0   | 0 0 | 0 0 | 0 0   | 27.29  |
| IPR014930 | 8 | 24 0 0   | 0 0 | 0 0   | 0 0 | 0 0 | 8 8   | 51.29  |
| IPR015123 | 8 | 19 0 0   | 0 0 | 0 0   | 0 0 | 0 0 | 9 9   | 95.76  |
| IPR015129 | 8 | 32 0 0   | 0 0 | 0 0   | 0 0 | 9 9 | 9 9   | 97.59  |
| IPR015341 | 8 | 451 4 2  | 2 0 | 4 2   | 2 0 | 2 0 | 4 2   | 21.68  |
| IPR015378 | 8 | 207 8 7  | 0 0 | 1 0   | 0 0 | 0 0 | 0 0   | 15.89  |
| IPR015425 | 8 | 49 0 0   | 0 0 | 2 2   | 0 0 | 3 1 | 4 2   | 7.22   |
| IPR015798 | 8 | 306 3 1  | 2 0 | 2 0   | 0 0 | 6 4 | 2 0   | 30.11  |
| IPR015847 | 8 | 2295 7 1 | 0 0 | 1 0   | 1 0 | 6 0 | 0 0   | 51.29  |
| IPR015942 | 8 | 1468 1 1 | 0 0 | 2 2   | 1 0 | 2 2 | 0 0   | 11.63  |
| IPR018121 | 8 | 207 0 0  | 0 0 | 10 10 | 0 0 | 0 0 | 0 0   | 25.74  |
| IPR018127 | 8 | 289 0 0  | 0 0 | 4 0   | 3 0 | 5 2 | 6 2   | 22.4   |
| IPR018306 | 8 | 623 5 5  | 0 0 | 0 0   | 2 2 | 1 1 | 0 0   | 17.57  |
| IPR018799 | 8 | 67 0 0   | 0 0 | 1 0   | 0 0 | 1 0 | 3 2   | 11.4   |
| IPR018886 | 8 | 62 5 4   | 0 0 | 3 2   | 0 0 | 0 0 | 0 0   | 45.49  |
| IPR018967 | 8 | 204 5 3  | 2 0 | 0 0   | 1 0 | 0 0 | 4 3   | 34.05  |
| IPR018975 | 8 | 45 1 1   | 7 7 | 0 0   | 0 0 | 0 0 | 0 0   | 20.46  |
| IPR019008 | 8 | 110 5 5  | 0 0 | 0 0   | 0 0 | 2 2 | 1 1   | 22.23  |
| IPR019446 | 8 | 89 0 0   | 0 0 | 4 4   | 0 0 | 0 0 | 4 4   | 31.77  |
| IPR019466 | 8 | 54 0 0   | 0 0 | 0 0   | 0 0 | 0 0 | 8 8   | 37.68  |
| IPR019503 | 8 | 35 6 6   | 0 0 | 4 2   | 0 0 | 2 0 | 2 0   | 25.44  |
| IPR019575 | 8 | 890 8 4  | 4 0 | 2 0   | 2 0 | 2 0 | 2 0   | 38.53  |
| IPR019580 | 8 | 94 0 0   | 0 0 | 8 1   | 7 0 | 7 0 | 7 0   | 68.97  |
| IPR019581 | 8 |          |     |       |     |     |       |        |

|                |   |           |     |       |       |     |       |       |
|----------------|---|-----------|-----|-------|-------|-----|-------|-------|
| IPR019752      | 8 | 1204 6 1  | 4 0 | 4 0   | 0 0   | 2 2 | 0 0   | 13.32 |
| IPR019831      | 8 | 1053 3 2  | 1 0 | 1 0   | 1 0   | 2 1 | 5 4   | 41.06 |
| IPR020802      | 8 | 15 8 8    | 0 0 | 0 0   | 0 0   | 0 0 | 0 0   | 38.73 |
| IPR021309      | 8 | 437 8 8   | 0 0 | 0 0   | 0 0   | 8 0 | 0 0   | 21.8  |
| IPR021602      | 8 | 69 0 0    | 0 0 | 7 7   | 1 1   | 0 0 | 0 0   | 35.19 |
| IPR021717      | 8 | 92 0 0    | 0 0 | 3 3   | 0 0   | 3 1 | 4 2   | 14.13 |
| IPR021773      | 8 | 105 0 0   | 0 0 | 8 7   | 0 0   | 1 0 | 1 0   | 14.92 |
| IPR021886      | 8 | 713 5 3   | 0 0 | 3 2   | 0 0   | 3 0 | 3 0   | 41.52 |
| IPR021983      | 8 | 78 0 0    | 0 0 | 8 1   | 7 0   | 7 0 | 7 0   | 84.95 |
| IPR022060      | 8 | 45 8 8    | 0 0 | 0 0   | 0 0   | 0 0 | 0 0   | 20.22 |
| IPR022257      | 8 | 74 0 0    | 0 0 | 0 0   | 0 0   | 8 8 | 0 0   | 29.88 |
| IPR022309      | 8 | 251 0 0   | 0 0 | 4 4   | 0 0   | 3 3 | 1 1   | 28.44 |
| PF01292        | 8 | 410 8 8   | 0 0 | 0 0   | 0 0   | 0 0 | 0 0   | 11.54 |
| PF02374        | 8 | 914 6 4   | 2 0 | 3 2   | 1 0   | 1 0 | 1 0   | 26.65 |
| PF03054        | 8 | 925 3 1   | 1 1 | 4 2   | 1 1   | 0 0 | 1 1   | 37.62 |
| PF03407        | 8 | 203 1 1   | 0 0 | 8 8   | 1 1   | 0 0 | 0 0   | 12.4  |
| PF07842        | 8 | 147 0 0   | 0 0 | 8 6   | 1 0   | 2 0 | 3 1   | 18.65 |
| PF11924        | 8 | 179 8 8   | 0 0 | 0 0   | 0 0   | 0 0 | 0 0   | 31.77 |
| PF11936        | 8 | 35 0 0    | 0 0 | 0 0   | 0 0   | 0 0 | 8 8   | 63.53 |
| PF11971        | 8 | 33 0 0    | 0 0 | 2 0   | 0 0   | 0 0 | 8 6   | 34.65 |
| PTHR10098:SF12 | 8 | 42 8 8    | 0 0 | 0 0   | 0 0   | 0 0 | 0 0   | 7.65  |
| PTHR11107      | 8 | 114 7 3   | 5 1 | 0 0   | 0 0   | 0 0 | 0 0   | 27.71 |
| PTHR12526      | 8 | 118 7 7   | 0 0 | 1 1   | 0 0   | 0 0 | 0 0   | 3.09  |
| PTHR13712:SF9  | 8 | 21 6 6    | 0 0 | 0 0   | 0 0   | 0 0 | 0 0   | 16.49 |
| PTHR13793      | 8 | 14 0 0    | 0 0 | 1 1   | 0 0   | 5 5 | 0 0   | 25.25 |
| PTHR22572      | 8 | 354 4 3   | 0 0 | 2 2   | 1 0   | 3 1 | 0 0   | 17.77 |
| PTHR23083:SF15 | 8 | 44 7 6    | 0 0 | 0 0   | 0 0   | 0 0 | 0 0   | 14.56 |
| TIGR01686      | 8 | 53 8 8    | 0 0 | 0 0   | 0 0   | 0 0 | 0 0   | 25.11 |
| TIGR03507      | 8 | 103 11 11 | 0 0 | 0 0   | 0 0   | 0 0 | 0 0   | 23.02 |
| IPR000038      | 9 | 484 0 0   | 0 0 | 0 0   | 0 0   | 3 3 | 4 4   | 29.91 |
| IPR000084      | 9 | 705 9 9   | 0 0 | 0 0   | 0 0   | 0 0 | 0 0   | 40.73 |
| IPR00175       | 9 | 1424 1 1  | 0 0 | 0 0   | 0 0   | 0 0 | 0 0   | 19.8  |
| IPR000241      | 9 | 743 8 6   | 2 0 | 1 0   | 0 0   | 1 1 | 1 0   | 21.5  |
| IPR000246      | 9 | 569 0 0   | 0 0 | 2 2   | 0 0   | 2 0 | 7 5   | 25.8  |
| IPR000352      | 9 | 2183 1 0  | 0 0 | 7 6   | 1 0   | 1 0 | 3 2   | 35.01 |
| IPR000361      | 9 | 1568 6 6  | 0 0 | 0 0   | 0 0   | 0 0 | 2 2   | 25.21 |
| IPR000387      | 9 | 186 4 4   | 0 0 | 0 0   | 0 0   | 3 2 | 3 2   | 30.98 |
| IPR000425      | 9 | 1572 1 1  | 0 0 | 4 4   | 0 0   | 1 1 | 3 3   | 23.01 |
| IPR000510      | 9 | 934 9 7   | 1 0 | 1 0   | 0 0   | 0 0 | 0 0   | 12.5  |
| IPR000602      | 9 | 482 4 2   | 2 0 | 4 2   | 2 0   | 2 0 | 4 2   | 18.81 |
| IPR000717      | 9 | 1125 0 0  | 0 0 | 6 1   | 4 0   | 8 3 | 5 0   | 9.85  |
| IPR000889      | 9 | 844 0 0   | 0 0 | 6 6   | 0 0   | 0 0 | 3 3   | 44.41 |
| IPR000926      | 9 | 1057 8 6  | 1 0 | 1 0   | 0 0   | 2 1 | 0 0   | 34.15 |
| IPR000933      | 9 | 285 6 5   | 0 0 | 1 0   | 0 0   | 0 0 | 2 2   | 24.69 |
| IPR001022      | 9 | 101 0 0   | 0 0 | 10 10 | 0 0   | 0 0 | 0 0   | 72.31 |
| IPR001036      | 9 | 4067 6 4  | 0 0 | 5 3   | 0 0   | 0 0 | 0 0   | 20.79 |
| IPR001045      | 9 | 900 7 7   | 0 0 | 1 0   | 0 0   | 1 1 | 1 0   | 18.73 |
| IPR001090      | 9 | 167 0 0   | 0 0 | 0 0   | 0 0   | 0 0 | 10 10 | 51.07 |
| IPR001250      | 9 | 465 8 8   | 0 0 | 0 0   | 0 0   | 1 1 | 0 0   | 22.92 |
| IPR001367      | 9 | 1068 7 6  | 0 0 | 3 2   | 0 0   | 0 0 | 0 0   | 12.4  |
| IPR001544      | 9 | 1998 5 5  | 0 0 | 0 0   | 0 0   | 5 5 | 0 0   | 14.88 |
| IPR001562      | 9 | 99 0 0    | 0 0 | 0 0   | 0 0   | 0 0 | 9 9   | 38.06 |
| IPR001604      | 9 | 534 2 1   | 0 0 | 6 5   | 0 0   | 0 0 | 2 2   | 14.92 |
| IPR001674      | 9 | 858 6 1   | 4 0 | 6 2   | 2 0   | 2 0 | 3 0   | 52.63 |
| IPR001792      | 9 | 1004 7 3  | 5 2 | 1 0   | 0 0   | 0 0 | 0 0   | 24.93 |
| IPR001952      | 9 | 670 8 8   | 0 0 | 0 0   | 0 0   | 0 0 | 0 0   | 27.22 |
| IPR002004      | 9 | 190 0 0   | 0 0 | 3 2   | 1 0   | 1 0 | 7 6   | 53.14 |
| IPR002020      | 9 | 1391 4 2  | 0 0 | 5 3   | 0 0   | 4 1 | 3 0   | 24.89 |
| IPR002059      | 9 | 151 8 7   | 0 0 | 1 0   | 0 0   | 0 0 | 2 0   | 21    |
| IPR002288      | 9 | 50 7 6    | 0 0 | 1 0   | 0 0   | 0 0 | 2 2   | 53.28 |
| IPR002429      | 9 | 1216 9 7  | 0 0 | 2 1   | 1 0   | 0 0 | 1 0   | 27.08 |
| IPR002525      | 9 | 1394 9 8  | 1 0 | 0 0   | 0 0   | 0 0 | 0 0   | 11.83 |
| IPR002616      | 9 | 949 3 3   | 1 1 | 4 4   | 0 0   | 0 0 | 2 2   | 32.24 |
| IPR002627      | 9 | 944 2 2   | 0 0 | 2 1   | 0 0   | 3 2 | 3 2   | 27.77 |
| IPR002686      | 9 | 1000 9 9  | 0 0 | 0 0   | 0 0   | 0 0 | 0 0   | 13.58 |
| IPR002713      | 9 | 560 2 2   | 0 0 | 1 0   | 1 0   | 3 2 | 5 4   | 18.85 |
| IPR002826      | 9 | 211 9 9   | 0 0 | 0 0   | 0 0   | 0 0 | 0 0   | 12.74 |
| IPR002881      | 9 | 906 8 7   | 1 0 | 1 1   | 0 0   | 0 0 | 0 0   | 23.68 |
| IPR002915      | 9 | 1111 8 8  | 0 0 | 0 0   | 0 0   | 1 1 | 0 0   | 16.41 |
| IPR002928      | 9 | 316 0 0   | 0 0 | 0 0   | 0 0   | 4 1 | 9 6   | 32.16 |
| IPR003099      | 9 | 756 7 6   | 2 1 | 1 1   | 0 0   | 0 0 | 0 0   | 17.93 |
| IPR003112      | 9 | 143 0 0   | 0 0 | 0 0   | 0 0   | 0 0 | 9 9   | 33.36 |
| IPR003122      | 9 | 315 10 8  | 0 0 | 0 0   | 0 0   | 0 0 | 0 0   | 12.59 |
| IPR003306      | 9 | 82 2 2    | 0 0 | 0 0   | 0 0   | 1 1 | 7 7   | 34.35 |
| IPR003307      | 9 | 290 0 0   | 0 0 | 4 2   | 3 0   | 4 0 | 6 2   | 22.45 |
| IPR003321      | 9 | 190 9 9   | 0 0 | 0 0   | 0 0   | 0 0 | 0 0   | 25.63 |
| IPR003325      | 9 | 367 9 8   | 0 0 | 1 0   | 0 0   | 0 0 | 0 0   | 34.56 |
| IPR003368      | 9 | 211 8 8   | 1 1 | 0 0   | 0 0   | 0 0 | 0 0   | 46.09 |
| IPR003374      | 9 | 701 6 6   | 0 0 | 3 3   | 0 0   | 0 0 | 0 0   | 18.82 |
| IPR003445      | 9 | 976 2 2   | 1 1 | 3 3   | 0 0   | 3 3 | 0 0   | 15.88 |
| IPR003448      | 9 | 658 2 1   | 2 1 | 2 2   | 0 0   | 2 2 | 1 1   | 26.67 |
| IPR003618      | 9 | 139 0 0   | 0 0 | 5 1   | 2 0   | 5 1 | 7 2   | 18.83 |
| IPR003672      | 9 | 411 3 2   | 5 5 | 2 1   | 0 0   | 0 0 | 0 0   | 30.11 |
| IPR003807      | 9 | 394 1 1   | 0 0 | 1 0   | 2 0   | 7 5 | 0 0   | 21.62 |
| IPR003871      | 9 | 118 0 0   | 0 0 | 0 0   | 10 10 | 0 0 | 0 0   | 16.98 |
| IPR004146      | 9 | 456 0 0   | 0 0 | 6 6   | 0 0   | 3 3 | 0 0   | 33.3  |
| IPR004172      | 9 | 247 0 0   | 0 0 | 0 0   | 0 0   | 0 0 | 9 9   | 13.33 |
| IPR004177      | 9 | 147 0 0   | 0 0 | 0 0   | 0 0   | 4 4 | 5 5   | 26.79 |
| IPR004249      | 9 | 248 0 0   | 0 0 | 10 10 | 0 0   | 0 0 | 0 0   | 32.24 |
| IPR004276      | 9 | 1134 4 1  | 1 0 | 2 0   | 0 0   | 8 6 | 0 0   | 15.52 |
| IPR004345      | 9 | 369 0 0   | 0 0 | 0 0   | 0 0   | 0 0 | 2 2   | 28.12 |
| IPR004588      | 9 | 653 2 2   | 0 0 | 7 7   | 0 0   | 0 0 | 0 0   | 42.92 |
| IPR005068      | 9 | 203 9 9   | 0 0 | 0 0   | 0 0   | 0 0 | 0 0   | 44.28 |
| IPR005077      | 9 | 63 9 9    | 0 0 | 0 0   | 0 0   | 0 0 | 0 0   | 16.49 |
| IPR005105      | 9 | 258 8 7   | 2 1 | 0 0   | 0 0   | 0 0 | 0 0   | 23.05 |
| IPR005193      | 9 | 51 8 8    | 0 0 | 0 0   | 0 0   | 1 1 | 0 0   | 27.95 |
| IPR005492      | 9 | 230 1 0   | 0 0 | 0 0   | 0 0   | 0 0 | 9 8   | 17.65 |
| IPR005594      | 9 | 381 9 9   | 0 0 | 0 0   | 0 0   | 0 0 | 0 0   | 20.83 |
| IPR005939      | 9 | 191 9 9   | 0 0 | 0 0   | 0 0   | 0 0 | 0 0   | 24.52 |
| IPR006050      | 9 | 789 1 0   | 1 0 | 9 8   | 2 1   | 1 0 | 1 0   | 16.23 |
| IPR006134      | 9 | 502 2 0   | 2 1 | 5 0   | 3 0   | 4 0 | 7 2   | 21.68 |
| IPR006150      | 9 | 164 0 0   | 0 0 | 0 0   | 0 0   | 0 0 | 10 10 | 30.85 |
| IPR006461      | 9 | 332 0 0   | 0 0 | 9 8   | 0 0   | 0 0 | 1 0   | 22.37 |
| IPR006592      | 9 | 87 5 1    | 3 0 | 7 3   | 4 0   | 5 1 | 5 1   | 29.73 |
| IPR006630      | 9 | 323 0 0   | 0 0 | 7 4   | 2 1   | 3 1 | 5 2   | 31.9  |
| IPR006642      | 9 | 62 0 0    | 0 0 | 2 1   | 0 0   | 5 0 | 7 1   | 49.03 |
| IPR006668      | 9 | 715 5 2   | 4 1 | 3 3   | 0 0   | 0 0 | 1 0   | 16.09 |
| IPR006869      | 9 | 208 2 2   | 0 0 | 0 0   | 0 0   | 1 1 | 3 1   | 28.82 |
| IPR007034      | 9 | 158 0 0   | 2 1 | 5 3   | 3 1   | 4 2 | 2 0   | 31.74 |
| IPR007117      | 9 | 401 3 2   | 0 0 | 5 4   | 0 0   | 3 2 | 0 0   | 31.88 |
| IPR007122      | 9 | 1132 0 0  | 0 0 | 3 2   | 0 0   | 1 0 | 4 2   | 15.6  |
| IPR007123      | 9 | 325 0 0   | 0 0 | 5 1   | 4 0   | 6 1 | 6 1   | 16.18 |
| IPR007213      | 9 | 575 5 5   | 0 0 | 0 0   | 1 0   | 3 2 | 0 0   | 17.09 |
| IPR007346      | 9 | 235 9 9   | 0 0 | 0 0   | 0 0   | 0 0 | 0 0   | 25.23 |
| IPR007348      | 9 | 341 9 8   | 1 0 | 0 0   | 0 0   | 0 0 | 0 0   | 22.74 |
| IPR007597      | 9 | 572 8 3   | 6 1 | 0 0   | 0 0   | 0 0 | 0 0   | 27.99 |
| IPR007642      | 9 | 12 0 0    | 0 0 | 7 3   | 0 0   | 0 0 | 6 2   | 23.22 |
| IPR007791      | 9 | 517 9 9   | 0 0 | 0 0   | 0 0   | 0 0 | 0 0   | 7.45  |
| IPR008144      | 9 | 41 0 0    | 0 0 | 3 3   | 0 0   | 0 0 | 6 6   | 10.39 |
| IPR008170      | 9 | 1992 5 3  | 6 4 | 0 0   | 0 0   | 0 0 | 0 0   | 14.67 |
| IPR008183      | 9 | 1303 3 3  | 0 0 | 2 2   | 0 0   | 4 4 | 0 0   | 12.66 |
| IPR008586      | 9 | 106 0 0   | 0 0 | 9 9   | 0 0   | 0 0 | 0 0   | 34.07 |
| IPR008640      | 9 | 1394 9 9  | 0 0 | 0 0   | 0 0   | 0 0 | 0 0   | 33.66 |
| IPR008731      | 9 | 919 9 7   | 2 0 | 0 0   | 0 0   | 0 0 | 0 0   | 18.52 |
| IPR008913      | 9 | 219 0 0   | 0 0 | 3 1   | 0 0   | 3 1 | 8 5   | 33.27 |
| IPR009039      | 9 | 68 1 0    | 0 0 | 0 0   | 0 0   | 9 8 | 0 0   | 11.83 |
| IPR009288      | 9 | 550 6 6   | 0 0 | 0 0   | 1 1   | 2 2 | 0 0   | 17.13 |
| IPR010332      | 9 | 122 8 8   | 1 1 | 0 0   | 0 0   | 0 0 | 0 0   | 25.52 |
| IPR010376      | 9 | 294 1 0   | 0 0 | 6 4   | 2 0   | 1 0 | 2 1   | 24.1  |
| IPR010402      | 9 | 357 0 0   | 0 0 | 10 10 | 0 0   | 0 0 | 0 0   | 47.93 |
| IPR010491      | 9 | 80 0 0    | 0 0 | 8 2   | 2 0   | 5 1 | 0 0   | 52.58 |
| IPR010493      | 9 | 352 6 2   | 2 2 | 4 0   | 0 0   | 0 0 | 0 0   | 30.25 |
| IPR010499      | 9 | 1030 8 6  | 2 1 | 1 0   | 0 0   | 0 0 | 0 0   | 4.2   |
| IPR010506      | 9 | 60 1 1    | 0 0 | 0 0   | 0 0   | 1 0 | 8 7   | 25.75 |
| IPR010507      | 9 | 214 1 0   | 2 0 | 0 0   | 0 0   | 0 0 | 8 7   | 19.78 |
| IPR010525      | 9 | 183 0 0   | 0 0 | 7 7   | 0 0   | 0 0 | 3 3   | 44.18 |
| IPR010566      | 9 | 183 9 9   | 0 0 | 0 0   | 0 0   | 0 0 | 0 0   | 27.77 |
| IPR010660      | 9 | 38 0 0    | 0 0 | 0 0   | 0 0   | 0 0 | 9 9   | 39.89 |
| IPR010663      | 9 | 1257 7 3  | 2 0 | 3 1   | 2 0   | 3 1 | 2 0   | 31.21 |
| IPR011105      | 9 | 351 9 9   | 0 0 | 0 0   | 0 0   | 0 0 | 0 0   | 26.84 |
| IPR011539      | 9 | 239 0 0   | 0 0 | 0 0   | 0 0   | 0 0 | 10 10 | 31.55 |
| IPR011612      | 9 | 386 7 5   | 1 0 | 3 0   | 0 0   | 4 1 | 3 0   | 58.09 |
| IPR011656      | 9 | 44 0 0    | 0 0 | 0 0   | 0 0   | 0 0 | 9 9   | 31.52 |
| IPR011682      | 9 | 493 4 2   | 2 0 | 4 2   | 2 0   | 2 0 | 5 3   | 10.11 |
| IPR011698      | 9 | 1232 8 7  | 1 0 | 2 1   | 0 0   | 0 0 | 0 0   | 21.4  |

|                |    |            |     |       |     |     |       |       |
|----------------|----|------------|-----|-------|-----|-----|-------|-------|
| IPRO12328      | 9  | 369 3 1    | 0 0 | 8 6   | 0 0 | 1 0 | 0 0   | 27.32 |
| IPRO12878      | 9  | 238 8 8    | 1 1 | 0 0   | 0 0 | 0 0 | 0 0   | 17.76 |
| IPRO12928      | 9  | 25 8 8     | 1 1 | 0 0   | 0 0 | 0 0 | 0 0   | 34.25 |
| IPRO12932      | 9  | 230 10 10  | 0 0 | 0 0   | 0 0 | 0 0 | 0 0   | 14.81 |
| IPRO12983      | 9  | 95 0 0     | 0 0 | 0 0   | 0 0 | 0 0 | 8 8   | 36.99 |
| IPRO13093      | 9  | 96 8 4     | 0 0 | 4 1   | 2 0 | 3 0 | 1 0   | 19.49 |
| IPRO13199      | 9  | 84 10 10   | 0 0 | 0 0   | 0 0 | 0 0 | 0 0   | 16.93 |
| IPRO13338      | 9  | 167 9 9    | 0 0 | 0 0   | 0 0 | 0 0 | 0 0   | 29.21 |
| IPRO13497      | 9  | 73 7 2     | 0 0 | 0 0   | 0 0 | 5 0 | 0 0   | 12.64 |
| IPRO13509      | 9  | 899 8 3    | 5 0 | 2 0   | 2 0 | 2 0 | 3 1   | 21.12 |
| IPRO13610      | 9  | 200 8 8    | 1 1 | 0 0   | 0 0 | 0 0 | 0 0   | 31.15 |
| IPRO13668      | 9  | 174 9 8    | 1 0 | 0 0   | 0 0 | 0 0 | 0 0   | 43.15 |
| IPRO13694      | 9  | 147 7 6    | 0 0 | 0 0   | 0 0 | 2 1 | 3 2   | 22.7  |
| IPRO13701      | 9  | 345 7 4    | 5 2 | 0 0   | 0 0 | 0 0 | 0 0   | 18.85 |
| IPRO13735      | 9  | 756 9 9    | 0 0 | 0 0   | 0 0 | 0 0 | 0 0   | 31.11 |
| IPRO13848      | 9  | 1566 5 2   | 2 0 | 2 0   | 2 0 | 0 0 | 7 4   | 30.8  |
| IPRO13937      | 9  | 124 0 0    | 0 0 | 5 3   | 0 0 | 6 2 | 4 0   | 19.59 |
| IPRO14036      | 9  | 1918 5 3   | 2 0 | 5 4   | 0 0 | 0 0 | 0 0   | 21.5  |
| IPRO14775      | 9  | 73 0 0     | 0 0 | 0 0   | 0 0 | 0 0 | 10 10 | 25.43 |
| IPRO14847      | 9  | 203 0 0    | 0 0 | 2 0   | 0 0 | 0 0 | 9 7   | 34.26 |
| IPRO14867      | 9  | 104 10 10  | 0 0 | 0 0   | 0 0 | 0 0 | 0 0   | 14.42 |
| IPRO14877      | 9  | 113 0 0    | 0 0 | 8 6   | 2 0 | 2 0 | 2 0   | 29.38 |
| IPRO14978      | 9  | 157 0 0    | 0 0 | 6 3   | 0 0 | 4 0 | 6 2   | 36.44 |
| IPRO15077      | 9  | 144 9 9    | 0 0 | 0 0   | 0 0 | 0 0 | 0 0   | 22.51 |
| IPRO15794      | 9  | 1198 4 2   | 3 1 | 3 2   | 1 0 | 1 0 | 3 2   | 22.82 |
| IPRO15803      | 9  | 1063 8 5   | 1 0 | 1 0   | 0 0 | 2 1 | 4 1   | 43.73 |
| IPRO15865      | 9  | 804 6 6    | 0 0 | 0 3   | 0 0 | 5 1 | 0 0   | 35.01 |
| IPRO15886      | 9  | 913 4 1    | 2 0 | 3 2   | 0 0 | 1 0 | 5 3   | 28.93 |
| IPRO15899      | 9  | 179 9 6    | 2 0 | 1 0   | 0 0 | 0 0 | 0 0   | 44.62 |
| IPRO17455      | 9  | 15 0 0     | 0 0 | 0 0   | 3 3 | 0 0 | 2 2   | 27.83 |
| IPRO18487      | 9  | 858 2 2    | 0 0 | 0 0   | 0 0 | 0 0 | 7 7   | 21.59 |
| IPRO18910      | 9  | 63 9 9     | 0 0 | 0 0   | 0 0 | 0 0 | 0 0   | 15.16 |
| IPRO18973      | 9  | 327 4 1    | 0 0 | 5 3   | 0 0 | 4 2 | 0 0   | 24.51 |
| IPRO19026      | 9  | 34 9 9     | 0 0 | 0 0   | 0 0 | 0 0 | 0 0   | 20.4  |
| IPRO19080      | 9  | 246 1 1    | 0 0 | 3 3   | 0 0 | 0 0 | 5 5   | 14.21 |
| IPRO19282      | 9  | 169 9 6    | 3 0 | 0 0   | 0 0 | 0 0 | 0 0   | 22.61 |
| IPRO19307      | 9  | 899 7 6    | 1 1 | 2 1   | 0 0 | 0 0 | 0 0   | 35.81 |
| IPRO19462      | 9  | 759 9 7    | 0 0 | 0 0   | 0 0 | 0 0 | 0 0   | 38.99 |
| IPRO19835      | 9  | 210 4 4    | 0 0 | 2 1   | 0 0 | 2 1 | 3 2   | 38.81 |
| IPRO20546      | 9  | 900 1 0    | 0 0 | 9 8   | 0 0 | 0 0 | 1 0   | 27.01 |
| IPRO20560      | 9  | 842 8 4    | 2 0 | 2 0   | 0 0 | 4 0 | 5 1   | 35.44 |
| IPRO20562      | 9  | 839 8 4    | 2 0 | 2 0   | 0 0 | 4 0 | 5 1   | 44.44 |
| IPRO20864      | 9  | 114 0 0    | 0 0 | 1 1   | 0 0 | 1 1 | 7 7   | 15.89 |
| IPRO20942      | 9  | 246 9 9    | 0 0 | 0 0   | 0 0 | 0 0 | 0 0   | 23.26 |
| IPRO20974      | 9  | 35 9 9     | 0 0 | 0 0   | 0 0 | 0 0 | 0 0   | 27.93 |
| IPRO21772      | 9  | 73 0 0     | 0 0 | 3 1   | 0 0 | 6 4 | 4 2   | 25.72 |
| IPRO21779      | 9  | 22 1 1     | 8 8 | 0 0   | 0 0 | 0 0 | 0 0   | 14.56 |
| IPRO21842      | 9  | 226 0 0    | 0 0 | 0 0   | 0 0 | 9 9 | 0 0   | 10.91 |
| IPRO22096      | 9  | 55 0 0     | 0 0 | 5 2   | 0 0 | 0 0 | 7 4   | 30.69 |
| IPRO22164      | 9  | 137 0 0    | 0 0 | 0 0   | 0 0 | 0 1 | 9 5   | 22.28 |
| PF03215        | 9  | 110 2 2    | 0 0 | 1 1   | 2 2 | 3 3 | 1 1   | 18.5  |
| PF03706        | 9  | 972 8 7    | 2 1 | 1 0   | 0 0 | 0 0 | 0 0   | 3.03  |
| PF05204        | 9  | 8 5 3      | 3 2 | 0 0   | 0 0 | 4 2 | 0 0   | 11.89 |
| PF06337        | 9  | 40 0 0     | 0 0 | 7 6   | 1 0 | 2 1 | 2 1   | 15.97 |
| PF06371        | 9  | 205 0 0    | 0 0 | 0 0   | 0 0 | 4 0 | 8 4   | 14.24 |
| PF09337        | 9  | 63 0 0     | 0 0 | 5 1   | 0 0 | 5 1 | 0 0   | 42.56 |
| PF10069        | 9  | 45 9 9     | 0 0 | 0 0   | 0 0 | 0 0 | 0 0   | 30.73 |
| PF10412        | 9  | 292 8 7    | 2 1 | 0 0   | 0 0 | 0 0 | 0 0   | 8.31  |
| PF11490        | 9  | 149 9 9    | 0 0 | 0 0   | 0 0 | 0 0 | 0 0   | 10.73 |
| PF11598        | 9  | 46 0 0     | 0 0 | 0 0   | 0 0 | 0 0 | 9 9   | 42.29 |
| PF12349        | 9  | 129 1 1    | 1 0 | 2 0   | 0 0 | 8 5 | 0 0   | 18.96 |
| PF12354        | 9  | 95 9 9     | 0 0 | 0 0   | 0 0 | 0 0 | 0 0   | 38.95 |
| PTHR10032      | 9  | 96 0 0     | 0 0 | 1 1   | 0 0 | 0 0 | 8 8   | 16.23 |
| PTHR10343      | 9  | 32 1 1     | 0 0 | 7 7   | 0 0 | 1 1 | 0 0   | 27.87 |
| PTHR10617      | 9  | 75 9 3     | 5 0 | 2 0   | 0 0 | 1 0 | 0 0   | 8.3   |
| PTHR23050      | 9  | 120 2 1    | 0 0 | 2 2   | 1 1 | 0 0 | 4 3   | 11.14 |
| PTHR23083-2F22 | 9  | 47 9 9     | 0 0 | 0 0   | 0 0 | 0 0 | 0 0   | 28.1  |
| PTHR23244      | 9  | 90 3 2     | 0 0 | 3 3   | 1 1 | 2 1 | 1 1   | 9.15  |
| TIGR03504      | 9  | 146 9 9    | 0 0 | 0 0   | 0 0 | 0 0 | 0 0   | 43.05 |
| IPRO00020      | 10 | 101 0 0    | 0 0 | 0 0   | 0 0 | 0 0 | 10 10 | 25.55 |
| IPRO00026      | 10 | 146 10 10  | 0 0 | 0 0   | 0 0 | 0 0 | 0 0   | 28.1  |
| IPRO00034      | 10 | 40 0 0     | 0 0 | 0 0   | 0 0 | 0 0 | 10 10 | 21.86 |
| IPRO00215      | 10 | 1196 1 1   | 0 0 | 0 4   | 0 0 | 5 5 | 0 0   | 18.48 |
| IPRO00262      | 10 | 1117 3 3   | 1 1 | 1 1   | 0 0 | 5 5 | 0 0   | 24.34 |
| IPRO00323      | 10 | 120 4 3    | 0 0 | 4 0   | 0 0 | 0 0 | 7 3   | 24.71 |
| IPRO00422      | 10 | 948 10 9   | 1 0 | 1 0   | 0 0 | 0 0 | 0 0   | 46.61 |
| IPRO00426      | 10 | 709 0 0    | 1 0 | 8 7   | 1 0 | 2 1 | 3 0   | 55.82 |
| IPRO00489      | 10 | 1473 9 3   | 5 2 | 5 0   | 1 0 | 2 0 | 4 0   | 23.95 |
| IPRO00534      | 10 | 2019 6 3   | 1 0 | 3 2   | 0 0 | 0 2 | 0 0   | 18.26 |
| IPRO00547      | 10 | 661 0 0    | 0 0 | 4 0   | 3 0 | 8 2 | 7 2   | 8.22  |
| IPRO00914      | 10 | 4499 5 3   | 4 3 | 2 2   | 0 0 | 0 0 | 1 0   | 12.51 |
| IPRO01029      | 10 | 1154 9 7   | 0 0 | 3 1   | 0 0 | 0 0 | 0 0   | 22.9  |
| IPRO01073      | 10 | 266 2 1    | 0 0 | 0 0   | 0 0 | 0 0 | 10 9  | 19.87 |
| IPRO01099      | 10 | 387 4 2    | 0 0 | 8 6   | 0 0 | 1 0 | 0 0   | 24.7  |
| IPRO01111      | 10 | 405 9 9    | 0 0 | 0 0   | 0 0 | 0 0 | 1 1   | 6.65  |
| IPRO01280      | 10 | 140 0 0    | 0 0 | 10 10 | 0 0 | 0 0 | 0 0   | 51.9  |
| IPRO01305      | 10 | 1242 5 3   | 5 3 | 3 1   | 2 0 | 3 1 | 2 0   | 34.48 |
| IPRO01370      | 10 | 407 0 0    | 0 0 | 1 0   | 0 0 | 1 1 | 9 9   | 33.11 |
| IPRO01486      | 10 | 444 9 9    | 0 0 | 1 1   | 0 0 | 0 0 | 0 0   | 17.06 |
| IPRO01492      | 10 | 1368 9 7   | 0 0 | 3 1   | 0 0 | 0 0 | 0 0   | 21.45 |
| IPRO01807      | 10 | 1339 5 3   | 2 0 | 1 4   | 0 0 | 2 1 | 0 0   | 16.91 |
| IPRO01808      | 10 | 1562 9 8   | 1 1 | 1 0   | 0 0 | 0 0 | 0 0   | 25.15 |
| IPRO01842      | 10 | 62 10 9    | 0 0 | 0 0   | 0 0 | 2 1 | 0 0   | 27.56 |
| IPRO01873      | 10 | 659 0 0    | 0 0 | 0 0   | 0 0 | 0 0 | 8 8   | 11.56 |
| IPRO01900      | 10 | 1128 6 4   | 1 0 | 1 0   | 1 0 | 5 3 | 1 0   | 23.85 |
| IPRO01906      | 10 | 430 0 0    | 0 0 | 10 10 | 0 0 | 0 0 | 0 0   | 26.77 |
| IPRO01944      | 10 | 432 6 4    | 1 0 | 5 4   | 0 0 | 3 1 | 0 0   | 28.84 |
| IPRO02014      | 10 | 177 1 1    | 0 0 | 1 0   | 1 1 | 5 0 | 7 2   | 15.66 |
| IPRO02404      | 10 | 148 0 0    | 0 0 | 0 0   | 0 0 | 0 0 | 11 11 | 22.89 |
| IPRO02420      | 10 | 202 0 0    | 0 0 | 5 3   | 3 0 | 2 0 | 7 4   | 11.41 |
| IPRO02474      | 10 | 891 5 0    | 1 0 | 2 1   | 5 0 | 8 1 | 8 1   | 43.26 |
| IPRO02498      | 10 | 214 0 0    | 0 0 | 4 2   | 0 0 | 2 1 | 6 4   | 24.99 |
| IPRO02504      | 10 | 1229 1 1   | 4 4 | 3 3   | 0 0 | 0 0 | 2 2   | 19.42 |
| IPRO02514      | 10 | 2398 9 8   | 0 0 | 1 0   | 0 0 | 1 1 | 0 0   | 13.64 |
| IPRO02529      | 10 | 2435 6 3   | 1 0 | 2 0   | 0 0 | 6 4 | 1 0   | 18.31 |
| IPRO02573      | 10 | 325 3 3    | 0 0 | 3 2   | 0 0 | 4 3 | 1 1   | 16.71 |
| IPRO03116      | 10 | 167 0 0    | 0 0 | 0 0   | 0 0 | 0 0 | 10 10 | 20.48 |
| IPRO03150      | 10 | 107 1 1    | 0 0 | 0 0   | 0 0 | 0 0 | 10 10 | 41.4  |
| IPRO03337      | 10 | 597 6 5    | 1 0 | 4 3   | 2 1 | 1 0 | 1 0   | 20.18 |
| IPRO03399      | 10 | 2651 9 9   | 0 0 | 1 1   | 0 0 | 0 0 | 0 0   | 15.13 |
| IPRO03585      | 10 | 100 0 0    | 0 0 | 0 0   | 0 0 | 0 0 | 10 10 | 51.48 |
| IPRO03759      | 10 | 648 10 6   | 3 0 | 4 0   | 0 0 | 0 0 | 4 0   | 29.89 |
| IPRO03779      | 10 | 2164 9 8   | 1 0 | 0 0   | 0 0 | 1 1 | 0 0   | 9.31  |
| IPRO03822      | 10 | 368 0 0    | 0 0 | 7 6   | 0 0 | 3 2 | 2 1   | 24.49 |
| IPRO04009      | 10 | 279 0 0    | 0 0 | 7 4   | 0 0 | 5 1 | 4 1   | 25.96 |
| IPRO04022      | 10 | 109 0 0    | 0 0 | 6 3   | 0 0 | 2 1 | 5 2   | 20.16 |
| IPRO04026      | 10 | 395 9 8    | 0 0 | 0 0   | 0 0 | 1 0 | 0 0   | 43.69 |
| IPRO04038      | 10 | 938 1 1    | 0 0 | 6 6   | 0 0 | 0 0 | 2 2   | 14.83 |
| IPRO04095      | 10 | 1903 9 3   | 5 1 | 6 0   | 0 0 | 4 0 | 4 0   | 24.96 |
| IPRO04147      | 10 | 1289 3 2   | 0 0 | 5 3   | 1 0 | 2 2 | 1 1   | 27.43 |
| IPRO04455      | 10 | 1370 5 4   | 2 1 | 2 2   | 0 0 | 2 1 | 1 1   | 16.8  |
| IPRO04835      | 10 | 228 3 2    | 1 0 | 0 0   | 0 0 | 5 5 | 1 0   | 19.92 |
| IPRO04968      | 10 | 327 9 8    | 1 0 | 0 0   | 0 0 | 0 0 | 0 0   | 49.98 |
| IPRO05000      | 10 | 1199 7 7   | 0 0 | 0 0   | 0 0 | 3 3 | 1 1   | 15.22 |
| IPRO05034      | 10 | 138 0 0    | 0 0 | 10 3  | 0 0 | 7 0 | 5 0   | 21.84 |
| IPRO05097      | 10 | 715 4 3    | 1 0 | 4 2   | 0 0 | 4 1 | 3 1   | 8.73  |
| IPRO05110      | 10 | 1087 5 3   | 2 0 | 4 2   | 0 0 | 5 3 | 2 0   | 26.97 |
| IPRO05139      | 10 | 1601 3 2   | 0 0 | 6 5   | 1 0 | 1 0 | 3 2   | 34.52 |
| IPRO05175      | 10 | 421 2 2    | 0 0 | 8 8   | 0 0 | 0 0 | 1 1   | 20.32 |
| IPRO05198      | 10 | 232 8 6    | 2 0 | 0 0   | 0 0 | 3 2 | 0 0   | 17.03 |
| IPRO05474      | 10 | 2160 9 7   | 0 0 | 2 0   | 2 0 | 2 0 | 0 0   | 25.52 |
| IPRO05534      | 10 | 262 10 9   | 0 0 | 1 0   | 0 0 | 0 0 | 0 0   | 12.06 |
| IPRO05545      | 10 | 1086 10 10 | 0 0 | 0 0   | 0 0 | 0 0 | 0 0   | 13.28 |
| IPRO05561      | 10 | 610 10 10  | 0 0 | 0 0   | 0 0 | 0 0 | 0 0   | 25.87 |
| IPRO06032      | 10 | 995 0 0    | 1 1 | 8 8   | 0 0 | 0 0 | 0 0   | 54.2  |
| IPRO06077      | 10 | 178 0 0    | 0 0 | 0 0   | 0 0 | 0 0 | 10 10 | 21.21 |
| IPRO06157      | 10 | 795 5 3    | 4 0 | 1 0   | 0 0 | 1 1 | 0 0   | 19.49 |
| IPRO06566      | 10 | 187 0 0    | 0 0 | 10 10 | 0 0 | 0 0 | 0 0   | 18.28 |
| IPRO06581      | 10 | 119 0 0    | 0 0 | 0 0   | 0 0 | 1 1 | 9 9   | 25.92 |
| IPRO06593      | 10 | 295 0 0    | 0 0 | 7 5   | 0 0 | 0 0 | 4 2   | 18.57 |
| IPRO06636      | 10 | 423 0 0    | 0 0 | 8 2   | 5 0 | 6 0 | 6 0   | 27.06 |
| IPRO06750      | 10 | 538 0 0    | 0 0 | 10 10 | 0 0 | 0 0 | 0 0   | 21.79 |
| IPRO06822      | 10 | 120 9 7    | 0 0 | 0 0   | 0 0 | 0 0 | 2 0   | 18.17 |
| IPRO07050      | 10 | 181 1 1    | 9 9 | 0 0   | 0 0 | 0 0 | 0 0   | 33.96 |
| IPRO07214      | 10 | 1620 5 3   | 0 0 | 6 4   | 3 0 | 3 0 | 0 0   | 13.26 |
| IPRO07225      | 10 | 98 0 0</   |     |       |     |     |       |       |

|                |    |            |     |       |     |     |       |       |
|----------------|----|------------|-----|-------|-----|-----|-------|-------|
| IPR007372      | 10 | 832 10 10  | 0 0 | 0 0   | 0 0 | 0 0 | 0 0   | 19.48 |
| IPR007492      | 10 | 1252 10 9  | 0 0 | 1 0   | 0 0 | 0 0 | 1 0   | 15.54 |
| IPR007529      | 10 | 281 0 0    | 0 0 | 7 3   | 2 1 | 0 0 | 5 2   | 38.12 |
| IPR007588      | 10 | 589 0 0    | 0 0 | 0 0   | 0 0 | 0 0 | 10 10 | 17.16 |
| IPR007737      | 10 | 382 10 10  | 0 0 | 0 0   | 0 0 | 0 0 | 0 0   | 12.84 |
| IPR007822      | 10 | 268 3 3    | 0 0 | 4 4   | 0 0 | 3 3 | 1 1   | 7.89  |
| IPR007859      | 10 | 345 9 1    | 0 0 | 3 0   | 1 0 | 7 1 | 3 0   | 42.46 |
| IPR007903      | 10 | 1522 7 4   | 3 1 | 3 2   | 0 0 | 0 0 | 0 0   | 11.41 |
| IPR008180      | 10 | 1210 3 2   | 0 0 | 1 0   | 0 0 | 0 0 | 7 7   | 25.94 |
| IPR008528      | 10 | 89 0 0     | 0 0 | 7 7   | 0 0 | 2 2 | 0 0   | 24.97 |
| IPR008753      | 10 | 844 4 3    | 1 0 | 0 0   | 0 0 | 1 0 | 3 2   | 10.44 |
| IPR008816      | 10 | 943 8 7    | 0 0 | 1 0   | 0 0 | 2 2 | 0 0   | 35.14 |
| IPR008883      | 10 | 104 0 0    | 0 0 | 2 1   | 1 1 | 2 1 | 7 6   | 30.84 |
| IPR009361      | 10 | 67 0 0     | 0 0 | 0 0   | 0 0 | 3 3 | 7 7   | 15.32 |
| IPR009460      | 10 | 41 0 0     | 0 0 | 0 0   | 0 0 | 0 0 | 10 10 | 34.82 |
| IPR010090      | 10 | 336 9 9    | 0 0 | 2 2   | 0 0 | 0 0 | 0 0   | 7.76  |
| IPR010314      | 10 | 74 0 0     | 0 0 | 5 2   | 2 0 | 5 1 | 7 3   | 25.65 |
| IPR010359      | 10 | 814 10 9   | 1 0 | 0 0   | 0 0 | 0 0 | 0 0   | 14.24 |
| IPR010456      | 10 | 1034 2 2   | 0 0 | 5 4   | 0 0 | 1 0 | 3 2   | 21.23 |
| IPR010466      | 10 | 216 10 10  | 0 0 | 0 0   | 0 0 | 0 0 | 0 0   | 17.73 |
| IPR011072      | 10 | 195 0 0    | 0 0 | 0 0   | 0 0 | 6 1 | 9 4   | 22.75 |
| IPR011083      | 10 | 339 10 10  | 0 0 | 0 0   | 0 0 | 0 0 | 0 0   | 36.59 |
| IPR011121      | 10 | 29 10 0    | 0 0 | 0 0   | 0 0 | 0 0 | 0 0   | 23.3  |
| IPR011429      | 10 | 65 11 11   | 0 0 | 0 0   | 0 0 | 0 0 | 0 0   | 26.53 |
| IPR011432      | 10 | 41 10 10   | 0 0 | 0 0   | 0 0 | 0 0 | 0 0   | 21.76 |
| IPR011613      | 10 | 522 7 5    | 1 0 | 0 0   | 0 0 | 2 1 | 1 1   | 19.85 |
| IPR012319      | 10 | 898 5 2    | 0 0 | 2 0   | 0 0 | 0 0 | 0 0   | 22.7  |
| IPR012960      | 10 | 140 3 2    | 2 0 | 3 1   | 2 0 | 3 1 | 6 4   | 51.37 |
| IPR013057      | 10 | 1450 0 0   | 0 0 | 8 8   | 0 0 | 0 0 | 1 1   | 8.98  |
| IPR013089      | 10 | 24 4 4     | 1 1 | 4 4   | 0 0 | 0 0 | 0 0   | 2.96  |
| IPR013101      | 10 | 226 0 0    | 0 0 | 9 8   | 0 0 | 0 0 | 2 1   | 27.05 |
| IPR013235      | 10 | 84 0 0     | 0 0 | 4 1   | 3 0 | 5 2 | 8 5   | 34.58 |
| IPR013332      | 10 | 878 4 3    | 1 0 | 1 1   | 0 0 | 6 5 | 0 0   | 13.49 |
| IPR013542      | 10 | 444 10 9   | 0 0 | 1 0   | 0 0 | 0 0 | 0 0   | 30.46 |
| IPR013596      | 10 | 199 0 0    | 0 0 | 10 10 | 0 0 | 0 0 | 0 0   | 21.56 |
| IPR013598      | 10 | 355 0 0    | 0 0 | 7 3   | 2 0 | 5 1 | 3 1   | 9.72  |
| IPR013625      | 10 | 74 0 0     | 0 0 | 0 0   | 0 0 | 0 0 | 4 4   | 22.82 |
| IPR013632      | 10 | 205 0 0    | 0 0 | 3 3   | 4 4 | 1 1 | 2 2   | 18.74 |
| IPR013662      | 10 | 76 0 0     | 0 0 | 2 0   | 3 0 | 0 0 | 10 7  | 47.9  |
| IPR013688      | 10 | 65 10 10   | 0 0 | 0 0   | 0 0 | 0 0 | 0 0   | 46.57 |
| IPR014731      | 10 | 948 9 8    | 1 0 | 1 0   | 1 0 | 1 0 | 1 0   | 49.29 |
| IPR014862      | 10 | 148 10 10  | 0 0 | 0 0   | 0 0 | 0 0 | 0 0   | 21.3  |
| IPR014905      | 10 | 162 0 0    | 0 0 | 8 4   | 0 0 | 6 2 | 3 0   | 12.85 |
| IPR014977      | 10 | 165 0 0    | 0 0 | 12 12 | 0 0 | 0 0 | 0 0   | 46.37 |
| IPR015413      | 10 | 1400 5 1   | 3 0 | 6 2   | 0 0 | 4 1 | 5 1   | 23.75 |
| IPR018028      | 10 | 988 6 4    | 2 0 | 5 4   | 0 0 | 2 0 | 1 0   | 33.18 |
| IPR018481      | 10 | 1514 5 4   | 1 0 | 1 0   | 0 0 | 5 5 | 0 0   | 25.22 |
| IPR018500      | 10 | 58 0 0     | 0 0 | 5 3   | 0 0 | 1 0 | 8 6   | 14.85 |
| IPR018712      | 10 | 266 8 8    | 0 0 | 0 0   | 0 0 | 3 3 | 0 0   | 24.38 |
| IPR018929      | 10 | 71 10 10   | 0 0 | 0 0   | 0 0 | 0 0 | 0 0   | 37.83 |
| IPR019103      | 10 | 114 0 0    | 0 0 | 7 3   | 1 0 | 6 1 | 3 0   | 28.75 |
| IPR019196      | 10 | 197 5 4    | 6 5 | 0 0   | 0 0 | 0 0 | 0 0   | 13.39 |
| IPR019378      | 10 | 312 0 0    | 0 0 | 10 10 | 0 0 | 0 0 | 0 0   | 16.81 |
| IPR019542      | 10 | 231 0 0    | 0 0 | 1 1   | 0 0 | 4 1 | 9 6   | 14.69 |
| IPR020576      | 10 | 957 1 0    | 0 0 | 8 7   | 1 0 | 3 2 | 1 0   | 27.07 |
| IPR020803      | 10 | 4 10 10    | 0 0 | 0 0   | 0 0 | 0 0 | 0 0   | 39.6  |
| IPR021097      | 10 | 22 0 0     | 0 0 | 0 0   | 0 0 | 0 0 | 9 9   | 55.29 |
| IPR021369      | 10 | 81 0 0     | 0 0 | 4 4   | 0 0 | 6 6 | 0 0   | 33.56 |
| IPR021800      | 10 | 87 10 10   | 0 0 | 0 0   | 0 0 | 0 0 | 0 0   | 23.88 |
| IPR022045      | 10 | 64 10 10   | 0 0 | 0 0   | 0 0 | 0 0 | 0 0   | 15.35 |
| PF01217        | 10 | 702 0 0    | 0 0 | 3 2   | 1 0 | 7 6 | 2 1   | 19.31 |
| PF02927        | 10 | 89 10 9    | 1 0 | 0 0   | 0 0 | 0 0 | 0 0   | 18.22 |
| PF03934        | 10 | 379 7 6    | 0 0 | 2 2   | 0 0 | 0 0 | 2 1   | 11.55 |
| PF04685        | 10 | 152 9 8    | 1 0 | 1 0   | 0 0 | 0 0 | 2 1   | 22.37 |
| PF12169        | 10 | 731 10 8   | 0 0 | 2 0   | 0 0 | 0 0 | 0 0   | 11.1  |
| PTHR10432      | 10 | 40 1 1     | 0 0 | 0 0   | 0 0 | 5 4 | 3 2   | 3.9   |
| PTHR11201      | 10 | 39 0 0     | 0 0 | 0 0   | 0 0 | 1 1 | 7 7   | 14.63 |
| PTHR11938-5F10 | 10 | 220 9 8    | 2 1 | 0 0   | 0 0 | 0 0 | 0 0   | 29.53 |
| PTHR22939      | 10 | 104 8 8    | 0 0 | 0 0   | 1 1 | 1 1 | 0 0   | 8.2   |
| PTHR23213      | 10 | 23 3 3     | 0 0 | 4 4   | 0 0 | 1 1 | 1 1   | 14.18 |
| TIGR01494      | 10 | 817 5 1    | 4 0 | 5 1   | 3 0 | 7 1 | 6 2   | 19.38 |
| IPR001556      | 11 | 364 0 0    | 0 0 | 1 0   | 0 0 | 5 4 | 7 6   | 22.9  |
| IPR001844      | 11 | 1359 10 9  | 0 0 | 1 0   | 0 0 | 1 1 | 1 0   | 8.85  |
| IPR000589      | 11 | 997 0 0    | 1 0 | 10 9  | 1 0 | 2 1 | 1 0   | 39.58 |
| IPR000640      | 11 | 3280 6 2   | 3 0 | 6 2   | 4 0 | 5 1 | 5 1   | 25.6  |
| IPR000653      | 11 | 1545 6 6   | 0 0 | 3 3   | 0 0 | 1 1 | 0 0   | 23.45 |
| IPR000682      | 11 | 942 9 9    | 0 0 | 0 0   | 0 0 | 2 2 | 0 0   | 22.2  |
| IPR000699      | 11 | 153 0 0    | 0 0 | 2 0   | 3 0 | 0 0 | 10 7  | 22.51 |
| IPR000971      | 11 | 733 11 9   | 0 0 | 0 0   | 0 0 | 1 1 | 0 0   | 16.91 |
| IPR001017      | 11 | 2098 9 7   | 0 0 | 3 1   | 1 0 | 2 1 | 1 0   | 17.71 |
| IPR001079      | 11 | 521 1 1    | 0 0 | 2 2   | 0 0 | 1 1 | 9 9   | 16.68 |
| IPR001162      | 11 | 776 8 3    | 5 0 | 4 3   | 0 0 | 0 0 | 0 0   | 37.58 |
| IPR001171      | 11 | 212 0 0    | 0 0 | 3 3   | 0 0 | 6 6 | 2 2   | 25.68 |
| IPR001351      | 11 | 944 3 0    | 2 0 | 7 5   | 1 0 | 3 2 | 1 0   | 48.8  |
| IPR001563      | 11 | 1012 1 1   | 0 0 | 0 0   | 0 0 | 0 0 | 0 0   | 20.47 |
| IPR001708      | 11 | 1059 6 6   | 0 0 | 3 3   | 0 0 | 1 1 | 1 1   | 26.63 |
| IPR001907      | 11 | 1553 6 5   | 1 0 | 4 4   | 0 0 | 0 0 | 1 1   | 35.64 |
| IPR001938      | 11 | 324 1 1    | 0 0 | 10 10 | 0 0 | 0 0 | 0 0   | 41.2  |
| IPR001962      | 11 | 1198 6 3   | 3 1 | 3 0   | 1 0 | 2 1 | 3 2   | 16.87 |
| IPR001967      | 11 | 1443 11 11 | 0 0 | 0 0   | 0 0 | 0 0 | 0 0   | 25.43 |
| IPR002037      | 11 | 198 11 11  | 0 0 | 0 0   | 0 0 | 0 0 | 0 0   | 15.03 |
| IPR002100      | 11 | 895 0 0    | 0 0 | 9 9   | 0 0 | 1 1 | 1 1   | 40.12 |
| IPR002143      | 11 | 1087 0 0   | 0 0 | 2 2   | 2 2 | 3 3 | 2 2   | 34.63 |
| IPR002225      | 11 | 399 0 0    | 0 0 | 6 6   | 0 0 | 5 5 | 0 0   | 18.11 |
| IPR002319      | 11 | 1078 5 2   | 6 4 | 3 0   | 1 0 | 2 1 | 2 1   | 37.39 |
| IPR002501      | 11 | 966 5 3    | 2 0 | 3 1   | 2 0 | 3 1 | 6 4   | 34.82 |
| IPR002731      | 11 | 785 10 7   | 2 0 | 0 0   | 0 0 | 1 0 | 1 1   | 13.27 |
| IPR002755      | 11 | 460 11 9   | 0 0 | 2 0   | 0 0 | 0 0 | 1 1   | 18.51 |
| IPR002789      | 11 | 504 10 6   | 5 1 | 0 0   | 0 0 | 0 0 | 0 0   | 13.04 |
| IPR002913      | 11 | 575 0 0    | 0 0 | 6 5   | 0 0 | 0 0 | 6 5   | 6.7   |
| IPR002941      | 11 | 1189 11 10 | 3 2 | 0 0   | 0 0 | 0 0 | 0 0   | 14.9  |
| IPR003000      | 11 | 1107 1 0   | 0 0 | 1 1   | 2 2 | 0 0 | 0 0   | 29.42 |
| IPR003128      | 11 | 197 0 0    | 0 0 | 3 2   | 0 0 | 0 0 | 3 2   | 43.26 |
| IPR003358      | 11 | 849 6 6    | 0 0 | 5 5   | 0 0 | 0 0 | 1 1   | 19.7  |
| IPR003388      | 11 | 392 1 1    | 0 0 | 10 10 | 0 0 | 0 0 | 0 0   | 14.18 |
| IPR003390      | 11 | 473 8 8    | 5 5 | 0 0   | 0 0 | 0 0 | 0 0   | 31.68 |
| IPR003402      | 11 | 272 3 2    | 2 1 | 5 0   | 3 1 | 0 0 | 1 1   | 19.64 |
| IPR003608      | 11 | 35 0 0     | 0 0 | 0 0   | 1 1 | 0 0 | 9 9   | 44.68 |
| IPR003690      | 11 | 467 0 0    | 0 0 | 10 9  | 0 0 | 0 0 | 2 1   | 12.86 |
| IPR003721      | 11 | 666 4 4    | 0 0 | 7 7   | 0 0 | 0 0 | 0 0   | 39.65 |
| IPR003817      | 11 | 787 4 3    | 0 0 | 5 3   | 0 0 | 4 2 | 2 0   | 22.24 |
| IPR004020      | 11 | 120 0 0    | 0 0 | 0 0   | 0 0 | 0 0 | 12 12 | 19.18 |
| IPR004124      | 11 | 27 12 12   | 0 0 | 0 0   | 0 0 | 0 0 | 0 0   | 29.89 |
| IPR004300      | 11 | 339 10 5   | 6 1 | 0 0   | 0 0 | 0 0 | 0 0   | 13.12 |
| IPR004443      | 11 | 730 3 2    | 1 0 | 3 3   | 1 0 | 3 2 | 3 2   | 24.48 |
| IPR004701      | 11 | 858 11 11  | 0 0 | 0 0   | 0 0 | 0 0 | 0 0   | 17.72 |
| IPR004776      | 11 | 1215 0 0   | 0 0 | 9 9   | 0 0 | 0 0 | 2 2   | 9.03  |
| IPR005066      | 11 | 384 6 5    | 1 0 | 6 2   | 0 0 | 4 0 | 2 0   | 22.09 |
| IPR005087      | 11 | 29 11 11   | 0 0 | 0 0   | 0 0 | 0 0 | 0 0   | 9.12  |
| IPR005331      | 11 | 274 9 8    | 0 0 | 2 1   | 0 0 | 0 0 | 1 1   | 5.84  |
| IPR005334      | 11 | 201 0 0    | 0 0 | 0 0   | 0 0 | 0 0 | 11 11 | 19.47 |
| IPR005480      | 11 | 907 7 2    | 3 0 | 3 0   | 5 0 | 8 1 | 8 1   | 36.15 |
| IPR005517      | 11 | 1608 5 2   | 3 0 | 4 1   | 3 0 | 4 1 | 6 3   | 33.11 |
| IPR005599      | 11 | 264 0 0    | 0 0 | 0 0   | 0 0 | 5 5 | 3 3   | 12.41 |
| IPR005698      | 11 | 1154 11 11 | 0 0 | 0 0   | 0 0 | 0 0 | 0 0   | 27.69 |
| IPR005793      | 11 | 1029 10 8  | 1 0 | 1 0   | 1 0 | 1 0 | 3 1   | 21.75 |
| IPR006045      | 11 | 907 2 2    | 0 0 | 9 9   | 0 0 | 0 0 | 0 0   | 13.96 |
| IPR006086      | 11 | 446 0 0    | 2 0 | 6 4   | 4 0 | 6 0 | 5 1   | 22.72 |
| IPR006133      | 11 | 494 1 0    | 6 4 | 5 0   | 4 0 | 5 0 | 6 1   | 12.46 |
| IPR006140      | 11 | 628 5 2    | 1 0 | 3 3   | 0 0 | 4 2 | 0 0   | 23.36 |
| IPR006380      | 11 | 183 6 4    | 0 0 | 7 5   | 0 0 | 0 0 | 0 0   | 15.24 |
| IPR006635      | 11 | 296 11 11  | 0 0 | 0 0   | 0 0 | 0 0 | 0 0   | 21.12 |
| IPR006688      | 11 | 704 0 0    | 0 0 | 2 2   | 0 0 | 0 0 | 8 8   | 42.62 |
| IPR006915      | 11 | 68 11 11   | 0 0 | 0 0   | 0 0 | 0 0 | 0 0   | 19.95 |
| IPR007195      | 11 | 408 11 11  | 0 0 | 0 0   | 0 0 | 0 0 | 0 0   | 20.1  |
| IPR007330      | 11 | 322 0 0    | 2 0 | 3 0   | 2 0 | 3 0 | 12 8  | 17.07 |
| IPR007577      | 11 | 353 7 6    | 0 0 | 2 0   | 0 0 | 1 1 | 2 1   | 18.26 |
| IPR007807      | 11 | 419 7 4    | 2 0 | 6 3   | 1 0 | 3 0 | 3 0   | 25.45 |
| IPR007860      | 11 | 917 3 0    | 3 0 | 7 3   | 0 0 | 6 2 | 5 2   | 15.27 |
| IPR008395      | 11 | 115 0 0    | 0 0 | 9 9   | 0 0 | 0 0 | 3 3   | 20.32 |
| IPR008619      | 11 | 796 11 11  | 0 0 | 0 0   | 0 0 | 0 0 | 0 0   | 6.76  |
| IPR008808      | 11 | 68 0 0     | 0 0 | 12 12 | 0 0 | 0 0 | 0 0   | 22.95 |
| IPR008918      | 11 | 353 2 1    | 2 0 | 7 4   |     |     |       |       |

|           |    |             |     |       |     |     |       |       |
|-----------|----|-------------|-----|-------|-----|-----|-------|-------|
| IPR010309 | 11 | 74 0 0      | 0 0 | 5 2   | 2 0 | 5 1 | 8 4   | 22.62 |
| IPR010606 | 11 | 154 0 0     | 0 0 | 1 1   | 0 0 | 0 0 | 9 9   | 46.33 |
| IPR010693 | 11 | 350 10 8    | 3 1 | 0 0   | 0 0 | 0 0 | 0 0   | 25.22 |
| IPR010766 | 11 | 474 11 9    | 1 0 | 1 0   | 0 0 | 1 0 | 0 0   | 17.82 |
| IPR011538 | 11 | 1185 11 7   | 4 0 | 2 0   | 2 0 | 2 0 | 2 0   | 36.6  |
| IPR012480 | 11 | 254 7 7     | 0 0 | 0 0   | 0 0 | 0 0 | 1 1   | 9.83  |
| IPR012921 | 11 | 167 0 0     | 0 0 | 7 4   | 1 0 | 4 1 | 6 2   | 17.28 |
| IPR012939 | 11 | 283 8 8     | 0 0 | 0 0   | 0 0 | 3 3 | 0 0   | 27.63 |
| IPR012947 | 11 | 2087 5 0    | 5 0 | 10 5  | 5 0 | 6 1 | 0 0   | 37.31 |
| IPR012970 | 11 | 83 11 9     | 2 0 | 0 0   | 0 0 | 2 0 | 0 0   | 25.10 |
| IPR013129 | 11 | 43 0 0      | 0 0 | 3 2   | 0 0 | 6 4 | 4 1   | 15.07 |
| IPR013540 | 11 | 35 11 11    | 0 0 | 0 0   | 0 0 | 0 0 | 0 0   | 34.3  |
| IPR013720 | 11 | 105 0 0     | 0 0 | 5 1   | 0 0 | 6 1 | 7 2   | 29.55 |
| IPR013822 | 11 | 1739 4 1    | 2 0 | 6 2   | 3 0 | 8 4 | 4 0   | 21.25 |
| IPR013894 | 11 | 77 0 0      | 0 0 | 0 0   | 0 0 | 1 1 | 7 5   | 17.04 |
| IPR013957 | 11 | 86 0 0      | 0 0 | 4 3   | 0 0 | 1 0 | 5 5   | 32.68 |
| IPR013979 | 11 | 198 2 0     | 0 0 | 1 0   | 2 1 | 7 4 | 6 3   | 19.26 |
| IPR014730 | 11 | 1861 7 6    | 1 0 | 1 0   | 1 0 | 4 3 | 1 0   | 13.38 |
| IPR014757 | 11 | 2231 9 8    | 1 0 | 3 2   | 0 0 | 0 0 | 0 0   | 13.7  |
| IPR014821 | 11 | 86 0 0      | 0 0 | 2 0   | 3 0 | 0 0 | 10 7  | 38.5  |
| IPR015330 | 11 | 152 10 7    | 5 2 | 0 0   | 0 0 | 0 0 | 0 0   | 11.22 |
| IPR015374 | 11 | 92 10 7     | 0 0 | 0 0   | 0 0 | 4 1 | 2 0   | 14.48 |
| IPR016044 | 11 | 581 0 0     | 0 0 | 0 0   | 0 0 | 0 0 | 10 10 | 28.73 |
| IPR016288 | 11 | 101 9 9     | 0 0 | 0 0   | 0 0 | 1 1 | 0 0   | 32.31 |
| IPR018484 | 11 | 2406 7 6    | 1 0 | 2 1   | 1 0 | 1 0 | 4 3   | 17.47 |
| IPR018497 | 11 | 812 4 3     | 1 0 | 0 0   | 0 0 | 1 0 | 7 6   | 24.89 |
| IPR018711 | 11 | 260 10 10   | 0 0 | 0 0   | 0 0 | 1 1 | 0 0   | 14.77 |
| IPR018990 | 11 | 100 8 8     | 3 3 | 0 0   | 0 0 | 0 0 | 0 0   | 17.78 |
| IPR019453 | 11 | 144 1 1     | 0 0 | 4 1   | 4 0 | 5 0 | 6 1   | 16.2  |
| IPR020068 | 11 | 286 0 0     | 0 0 | 0 0   | 0 0 | 0 0 | 11 11 | 35.69 |
| PF03205   | 11 | 517 7 6     | 3 2 | 2 1   | 1 0 | 1 0 | 2 1   | 19.65 |
| PF03534   | 11 | 68 11 11    | 0 0 | 0 0   | 0 0 | 0 0 | 0 0   | 25.97 |
| PF05203   | 11 | 18 10 10    | 0 0 | 0 0   | 0 0 | 1 1 | 0 0   | 21.55 |
| PF05598   | 11 | 1034 8 7    | 1 0 | 0 0   | 0 0 | 0 0 | 3 3   | 14.5  |
| PF08214   | 11 | 82 0 0      | 0 0 | 5 3   | 0 0 | 1 1 | 7 5   | 26.39 |
| PF08645   | 11 | 357 6 6     | 0 0 | 1 1   | 1 1 | 3 2 | 1 0   | 24.65 |
| PF10503   | 11 | 301 10 10   | 0 0 | 0 0   | 0 0 | 1 1 | 0 0   | 20.68 |
| PF10996   | 11 | 579 4 1     | 0 0 | 7 3   | 4 0 | 5 2 | 5 1   | 20.31 |
| PF11614   | 11 | 274 11 10   | 1 0 | 0 0   | 0 0 | 0 0 | 0 0   | 15.96 |
| PF11790   | 11 | 95 10 10    | 0 0 | 0 0   | 0 0 | 1 1 | 0 0   | 16.51 |
| PTHR10887 | 11 | 178 2 2     | 1 1 | 1 1   | 0 0 | 3 3 | 2 2   | 11.29 |
| PTHR10891 | 11 | 158 1 0     | 0 0 | 4 3   | 4 3 | 0 0 | 4 3   | 11.88 |
| PTHR11938 | 11 | 150 11 10   | 1 0 | 0 0   | 0 0 | 0 0 | 0 0   | 23.39 |
| PTHR23154 | 11 | 365 4 3     | 0 0 | 3 3   | 0 0 | 4 2 | 1 0   | 13.88 |
| PTHR23241 | 11 | 133 8 8     | 0 0 | 4 4   | 0 0 | 0 0 | 0 0   | 5.92  |
| TIGR03142 | 11 | 163 12 12   | 0 0 | 0 0   | 0 0 | 0 0 | 0 0   | 19.89 |
| IPR000058 | 12 | 404 0 0     | 3 3 | 4 3   | 1 0 | 1 0 | 6 4   | 36.43 |
| IPR000061 | 12 | 354 0 0     | 0 0 | 10 2  | 4 1 | 5 1 | 8 0   | 24.71 |
| IPR000233 | 12 | 249 0 0     | 0 0 | 0 0   | 0 0 | 0 0 | 8 8   | 36.07 |
| IPR000277 | 12 | 2382 6 6    | 0 0 | 0 0   | 0 0 | 0 0 | 0 0   | 30.99 |
| IPR000331 | 12 | 255 0 0     | 0 0 | 0 0   | 0 0 | 2 0 | 9 7   | 22.39 |
| IPR000490 | 12 | 597 3 3     | 0 0 | 9 9   | 0 0 | 0 0 | 0 0   | 25.68 |
| IPR000560 | 12 | 714 1 1     | 0 0 | 1 0   | 1 0 | 7 6 | 4 3   | 9.12  |
| IPR000726 | 12 | 307 10 10   | 0 0 | 1 1   | 0 0 | 0 0 | 1 1   | 28.17 |
| IPR000788 | 12 | 1253 11 6   | 5 0 | 2 0   | 2 0 | 2 0 | 3 1   | 23.03 |
| IPR000867 | 12 | 163 0 0     | 0 0 | 0 0   | 0 0 | 0 0 | 12 12 | 35.6  |
| IPR001096 | 12 | 225 8 8     | 1 1 | 3 3   | 0 0 | 0 0 | 0 0   | 19.89 |
| IPR001320 | 12 | 816 0 0     | 0 0 | 5 4   | 0 0 | 0 0 | 9 8   | 11.28 |
| IPR001388 | 12 | 555 0 0     | 0 0 | 7 6   | 0 0 | 2 2 | 4 3   | 24.2  |
| IPR001506 | 12 | 31 4 4      | 0 0 | 0 0   | 0 0 | 1 1 | 7 7   | 9.91  |
| IPR001597 | 12 | 717 10 9    | 0 0 | 2 2   | 1 0 | 1 1 | 1 0   | 19.37 |
| IPR001762 | 12 | 354 3 3     | 0 0 | 1 0   | 0 0 | 1 2 | 7 4   | 43.22 |
| IPR001826 | 12 | 303 13 13   | 0 0 | 0 0   | 0 0 | 0 0 | 0 0   | 37.12 |
| IPR001875 | 12 | 121 0 0     | 0 0 | 0 0   | 0 0 | 0 0 | 13 13 | 20.53 |
| IPR002023 | 12 | 1091 12 11  | 1 0 | 0 0   | 0 0 | 0 0 | 0 0   | 24.32 |
| IPR002192 | 12 | 1025 7 5    | 2 0 | 6 4   | 2 0 | 3 1 | 1 0   | 24.48 |
| IPR002379 | 12 | 1704 0 0    | 0 0 | 6 6   | 0 0 | 6 6 | 1 1   | 23.82 |
| IPR002550 | 12 | 1635 2 0    | 2 0 | 8 6   | 2 0 | 2 1 | 4 2   | 16.99 |
| IPR002611 | 12 | 447 13 13   | 0 0 | 0 0   | 0 0 | 0 0 | 0 0   | 13.01 |
| IPR002694 | 12 | 858 13 13   | 0 0 | 0 0   | 0 0 | 0 0 | 0 0   | 36.41 |
| IPR002781 | 12 | 2635 5 5    | 1 1 | 6 6   | 0 0 | 0 0 | 0 0   | 9.4   |
| IPR002880 | 12 | 1044 8 1    | 6 0 | 4 0   | 0 0 | 4 4 | 0 0   | 18.47 |
| IPR002891 | 12 | 676 10 9    | 0 0 | 1 1   | 1 0 | 1 0 | 1 0   | 43.47 |
| IPR002932 | 12 | 1090 8 3    | 8 3 | 4 0   | 4 0 | 5 1 | 4 0   | 33.39 |
| IPR003104 | 12 | 391 0 0     | 0 0 | 2 1   | 1 0 | 3 0 | 8 5   | 17.99 |
| IPR003105 | 12 | 169 1 1     | 0 0 | 9 3   | 3 0 | 0 0 | 5 2   | 33.83 |
| IPR003130 | 12 | 349 0 0     | 0 0 | 5 2   | 2 0 | 8 6 | 3 0   | 20.47 |
| IPR003159 | 12 | 105 12 8    | 2 0 | 0 0   | 0 0 | 2 0 | 2 0   | 21.93 |
| IPR003349 | 12 | 249 0 0     | 0 0 | 10 3  | 7 0 | 0 0 | 8 1   | 43.44 |
| IPR003495 | 12 | 1974 4 3    | 1 0 | 9 8   | 1 0 | 2 1 | 1 0   | 24.88 |
| IPR003501 | 12 | 1268 12 12  | 0 0 | 0 0   | 0 0 | 0 0 | 0 0   | 17.56 |
| IPR003533 | 12 | 204 0 0     | 0 0 | 0 0   | 1 1 | 0 0 | 11 11 | 27.02 |
| IPR003606 | 12 | 75 0 0      | 0 0 | 3 1   | 0 0 | 0 0 | 11 9  | 38.92 |
| IPR003714 | 12 | 1004 11 10  | 2 1 | 0 0   | 0 0 | 0 0 | 0 0   | 43.55 |
| IPR003737 | 12 | 875 12 11   | 0 0 | 1 0   | 0 0 | 0 0 | 0 0   | 19.35 |
| IPR003777 | 12 | 566 12 10   | 2 0 | 0 0   | 0 0 | 0 0 | 0 0   | 24.38 |
| IPR003790 | 12 | 265 11 10   | 2 1 | 0 0   | 0 0 | 0 0 | 0 0   | 19.32 |
| IPR003834 | 12 | 1156 11 8   | 3 1 | 2 0   | 0 0 | 0 0 | 0 0   | 18.04 |
| IPR004042 | 12 | 41 11 6     | 6 1 | 0 0   | 0 0 | 0 0 | 0 0   | 11.68 |
| IPR004096 | 12 | 200 9 8     | 4 3 | 0 0   | 0 0 | 0 0 | 0 0   | 17.8  |
| IPR004103 | 12 | 76 12 10    | 2 0 | 0 0   | 0 0 | 0 0 | 0 0   | 19.26 |
| IPR004104 | 12 | 2340 11 9   | 2 0 | 2 1   | 0 0 | 2 1 | 1 0   | 9.5   |
| IPR004119 | 12 | 728 2 2     | 0 0 | 1 1   | 0 0 | 1 1 | 8 8   | 16.93 |
| IPR004160 | 12 | 1531 5 3    | 2 0 | 5 3   | 2 0 | 3 1 | 5 3   | 33.41 |
| IPR004265 | 12 | 303 0 0     | 0 0 | 12 12 | 0 0 | 0 0 | 0 0   | 22.44 |
| IPR004274 | 12 | 661 2 2     | 0 0 | 7 5   | 2 1 | 2 1 | 0 0   | 20.33 |
| IPR004294 | 12 | 450 1 1     | 0 0 | 6 6   | 0 0 | 0 0 | 5 5   | 16.95 |
| IPR004680 | 12 | 1342 5 4    | 0 0 | 6 5   | 0 0 | 2 2 | 0 0   | 7.88  |
| IPR005046 | 12 | 240 13 13   | 0 0 | 0 0   | 0 0 | 0 0 | 0 0   | 31.41 |
| IPR005106 | 12 | 1091 9 5    | 6 3 | 3 0   | 0 0 | 1 0 | 3 0   | 15.96 |
| IPR005201 | 12 | 80 9 9      | 0 0 | 1 1   | 2 2 | 0 0 | 1 1   | 29.46 |
| IPR005323 | 12 | 163 12 9    | 0 0 | 0 0   | 0 0 | 0 0 | 0 0   | 21.14 |
| IPR005330 | 12 | 610 12 8    | 0 0 | 1 0   | 0 0 | 1 0 | 0 0   | 19.06 |
| IPR005630 | 12 | 602 1 1     | 0 0 | 8 8   | 0 0 | 3 3 | 0 0   | 14.02 |
| IPR005644 | 12 | 1393 10 9   | 0 0 | 3 2   | 0 0 | 0 0 | 0 0   | 16.84 |
| IPR005843 | 12 | 2289 7 4    | 3 0 | 3 0   | 3 0 | 6 3 | 5 2   | 16.76 |
| IPR005846 | 12 | 2358 8 4    | 4 0 | 3 0   | 3 0 | 5 2 | 5 2   | 15.65 |
| IPR006070 | 12 | 1547 7 3    | 4 0 | 1 0   | 2 1 | 1 0 | 3 3   | 21.4  |
| IPR006085 | 12 | 401 0 0     | 2 0 | 6 4   | 2 0 | 5 2 | 6 3   | 23.41 |
| IPR006131 | 12 | 1823 3 2    | 1 0 | 1 0   | 1 0 | 9 2 | 8 1   | 25.59 |
| IPR006576 | 12 | 94 0 0      | 0 0 | 0 0   | 0 0 | 0 0 | 11 11 | 38.81 |
| IPR006605 | 12 | 45 1 1      | 0 0 | 0 0   | 0 0 | 0 0 | 11 11 | 33.82 |
| IPR006905 | 12 | 317 9 3     | 4 1 | 0 0   | 0 0 | 7 2 | 0 0   | 16.16 |
| IPR006913 | 12 | 1002 2 2    | 0 0 | 3 3   | 0 0 | 7 7 | 0 0   | 17.11 |
| IPR007235 | 12 | 1239 10 5   | 4 0 | 2 0   | 1 0 | 0 0 | 2 2   | 15.58 |
| IPR007275 | 12 | 244 2 2     | 0 0 | 3 2   | 1 0 | 1 1 | 6 6   | 41.54 |
| IPR007658 | 12 | 384 0 0     | 0 0 | 12 12 | 0 0 | 0 0 | 0 0   | 36.39 |
| IPR007685 | 12 | 1380 6 3    | 0 0 | 7 3   | 0 0 | 2 1 | 0 0   | 35.88 |
| IPR007694 | 12 | 682 12 10   | 0 0 | 1 0   | 0 0 | 0 0 | 1 0   | 30.86 |
| IPR007831 | 12 | 834 12 10   | 1 0 | 1 0   | 0 0 | 0 0 | 0 0   | 10.34 |
| IPR008269 | 12 | 2127 7 3    | 7 4 | 4 1   | 2 0 | 3 0 | 5 2   | 23.19 |
| IPR008775 | 12 | 769 3 3     | 0 0 | 7 7   | 0 0 | 2 2 | 1 1   | 10.68 |
| IPR008914 | 12 | 930 4 3     | 1 0 | 0 0   | 0 0 | 2 2 | 5 5   | 20.54 |
| IPR009042 | 12 | 1588 12 9   | 0 0 | 3 0   | 0 0 | 0 0 | 0 0   | 34.9  |
| IPR009291 | 12 | 132 0 0     | 0 0 | 11 9  | 0 0 | 0 0 | 0 0   | 21.14 |
| IPR010095 | 12 | 1508 10 7   | 0 0 | 3 0   | 0 0 | 0 0 | 0 0   | 25.33 |
| IPR010435 | 12 | 115 12 10   | 0 0 | 2 0   | 0 0 | 1 0 | 0 0   | 15.46 |
| IPR010618 | 12 | 239 12 12   | 0 0 | 0 0   | 0 0 | 0 0 | 0 0   | 39.94 |
| IPR011115 | 12 | 898 6 4     | 0 0 | 4 3   | 0 0 | 0 0 | 5 4   | 50.76 |
| IPR011662 | 12 | 895 12 10   | 0 0 | 2 0   | 0 0 | 0 0 | 0 0   | 13.46 |
| IPR011683 | 12 | 102 12 11 0 | 0 0 | 0 0   | 0 0 | 2 1 | 0 0   | 34.25 |
| IPR013050 | 12 | 89 1 1      | 1 1 | 6 2   | 0 0 | 1 0 | 9 5   | 10.82 |
| IPR013144 | 12 | 288 0 0     | 0 0 | 7 2   | 1 0 | 8 3 | 5 1   | 13.46 |
| IPR013227 | 12 | 256 0 0     | 0 0 | 14 14 | 0 0 | 0 0 | 0 0   | 21.19 |
| IPR013667 | 12 | 67 12 12    | 0 0 | 0 0   | 0 0 | 0 0 | 0 0   | 36.84 |
| IPR014818 | 12 | 187 12 8    | 5 1 | 0 0   | 0 0 | 0 0 | 0 0   | 8.28  |
| IPR015793 | 12 | 1303 4 2    | 0 0 | 7 6   | 1 0 | 1 6 | 3 2   | 37.71 |
| IPR016093 | 12 | 714 1 1     | 0 0 | 0 0   | 0 0 | 1 0 | 9 8   | 18.35 |
| IPR017459 | 12 | 1341 10 7   | 5 2 | 1 0   | 0 0 | 1 0 | 2 0   | 18.9  |
| IPR017897 | 12 | 74 2 2      | 0 0 | 0 0   | 0 0 | 0 0 | 6 6   | 44.01 |
| IPR017933 | 12 | 649 3 2     | 0 0 | 3 2   | 1 0 | 6 5 | 3 2   | 3.34  |
| IPR018077 | 12 | 166 12 12   | 0 0 | 0 0   | 0 0 | 0 0 | 0 0   | 33.71 |
| IPR018444 |    |             |     |       |     |     |       |       |

|                |    |            |     |       |     |       |       |       |
|----------------|----|------------|-----|-------|-----|-------|-------|-------|
| IPRO20561      | 12 | 874 11 7   | 2 0 | 2 0   | 0 0 | 4 0   | 5 1   | 42.45 |
| IPRO20829      | 12 | 1573 4 3   | 1 0 | 9 8   | 1 0 | 1 0   | 1 0   | 41.88 |
| IPRO21655      | 12 | 66 11 11   | 0 0 | 0 0   | 0 0 | 0 0   | 1 1   | 48.26 |
| IPRO21820      | 12 | 217 0 0    | 0 0 | 12 12 | 0 0 | 0 0   | 0 0   | 31.69 |
| PF02176        | 12 | 254 0 0    | 0 0 | 4 4   | 0 0 | 1 0   | 7 6   | 23.22 |
| PF03267        | 12 | 166 0 0    | 0 0 | 12 12 | 0 0 | 0 0   | 0 0   | 43.48 |
| PF04265        | 12 | 284 2 1    | 0 0 | 10 9  | 1 0 | 2 1   | 1 0   | 14.08 |
| PF07669        | 12 | 238 12 10  | 2 0 | 0 0   | 0 0 | 0 0   | 0 0   | 17.28 |
| PF09848        | 12 | 179 10 10  | 1 1 | 0 0   | 0 0 | 0 0   | 2 2   | 10.64 |
| PF11987        | 12 | 932 4 1    | 2 0 | 4 1   | 3 1 | 4 1   | 3 0   | 39.55 |
| PTHR19959:SF16 | 12 | 142 10 5   | 0 0 | 0 0   | 0 0 | 3 2   | 4 0   | 20.1  |
| PTHR21180      | 12 | 137 11 11  | 1 1 | 0 0   | 0 0 | 0 0   | 0 0   | 29.32 |
| PTHR23125      | 12 | 309 2 2    | 0 0 | 7 6   | 2 1 | 2 1   | 3 2   | 2.97  |
| TIGR01720      | 12 | 84 13 13   | 0 0 | 0 0   | 0 0 | 0 0   | 0 0   | 26.35 |
| IPRO00109      | 13 | 1470 2 2   | 0 0 | 9 9   | 0 0 | 3 3   | 0 0   | 18.34 |
| IPRO00197      | 13 | 137 0 0    | 0 0 | 8 5   | 0 0 | 0 0   | 7 4   | 33.82 |
| IPRO00312      | 13 | 1259 11 8  | 5 2 | 1 0   | 0 0 | 1 0   | 2 0   | 23.46 |
| IPRO00537      | 13 | 2268 6 5   | 2 1 | 0 0   | 0 0 | 6 6   | 0 0   | 6.29  |
| IPRO00618      | 13 | 2095 0 0   | 0 0 | 0 0   | 0 0 | 0 0   | 9 9   | 26.75 |
| IPRO00697      | 13 | 225 0 0    | 0 0 | 0 0   | 0 0 | 3 1   | 14 12 | 21.03 |
| IPRO00713      | 13 | 2388 11 7  | 0 0 | 4 2   | 0 0 | 4 0   | 0 0   | 19.86 |
| IPRO00721      | 13 | 29 0 0     | 0 0 | 0 0   | 0 0 | 0 0   | 14 14 | 38.31 |
| IPRO00756      | 13 | 256 1 0    | 0 0 | 4 2   | 3 1 | 0 0   | 11 9  | 25.96 |
| IPRO00857      | 13 | 233 0 0    | 0 0 | 2 1   | 0 0 | 1 0   | 11 9  | 19.42 |
| IPRO00905      | 13 | 1733 5 2   | 7 3 | 3 2   | 0 0 | 2 2   | 0 0   | 18.05 |
| IPRO01012      | 13 | 571 0 0    | 0 0 | 6 2   | 3 1 | 5 0   | 10 3  | 15.02 |
| IPRO01060      | 13 | 419 0 0    | 0 0 | 3 2   | 0 0 | 1 1   | 15 11 | 12.26 |
| IPRO01139      | 13 | 224 13 13  | 0 0 | 0 0   | 0 0 | 0 0   | 0 0   | 20.66 |
| IPRO01330      | 13 | 1719 9 9   | 0 0 | 2 2   | 1 1 | 0 0   | 1 1   | 15.18 |
| IPRO01362      | 13 | 431 11 11  | 0 0 | 2 2   | 0 0 | 0 0   | 0 0   | 22.46 |
| IPRO01537      | 13 | 3036 9 8   | 0 0 | 3 2   | 1 0 | 1 0   | 2 1   | 19.99 |
| IPRO01608      | 13 | 2170 8 7   | 1 0 | 3 3   | 1 0 | 1 1   | 1 1   | 12.36 |
| IPRO01672      | 13 | 932 4 4    | 0 0 | 8 8   | 0 0 | 0 0   | 1 1   | 25.2  |
| IPRO01732      | 13 | 1378 5 2   | 3 0 | 8 6   | 2 0 | 3 1   | 2 0   | 27.6  |
| IPRO01750      | 13 | 4576 10 6  | 2 0 | 6 3   | 0 0 | 0 0   | 4 1   | 23.72 |
| IPRO01765      | 13 | 1116 6 6   | 0 0 | 6 6   | 0 0 | 1 1   | 0 0   | 24.64 |
| IPRO01986      | 13 | 1794 8 5   | 0 0 | 2 2   | 1 0 | 6 2   | 0 0   | 22    |
| IPRO02463      | 13 | 199 0 0    | 0 0 | 4 3   | 0 0 | 5 3   | 5 3   | 27    |
| IPRO02492      | 13 | 122 2 0    | 0 0 | 1 1   | 0 0 | 7 3   | 8 6   | 15.48 |
| IPRO02500      | 13 | 1365 8 6   | 4 2 | 2 1   | 0 0 | 1 1   | 2 1   | 17.77 |
| IPRO02543      | 13 | 1120 13 12 | 0 0 | 1 0   | 0 0 | 1 1   | 0 0   | 19.62 |
| IPRO02545      | 13 | 2706 10 4  | 8 2 | 2 0   | 0 0 | 0 0   | 3 2   | 17.21 |
| IPRO02547      | 13 | 1721 9 6   | 2 0 | 4 1   | 1 0 | 1 0   | 4 2   | 28.92 |
| IPRO02559      | 13 | 4041 8 7   | 1 0 | 0 0   | 1 0 | 0 0   | 2 1   | 2.43  |
| IPRO02877      | 13 | 1324 3 2   | 2 1 | 6 3   | 2 0 | 1 1   | 5 3   | 21.67 |
| IPRO03032      | 13 | 155 1 1    | 0 0 | 0 0   | 0 0 | 2 2   | 10 10 | 33.85 |
| IPRO03135      | 13 | 1025 10 6  | 4 1 | 1 0   | 0 0 | 2 1   | 1 1   | 27.79 |
| IPRO03149      | 13 | 205 10 9   | 0 0 | 1 0   | 0 0 | 0 0   | 1 0   | 31.06 |
| IPRO03352      | 13 | 2657 13 13 | 0 0 | 0 0   | 0 0 | 0 0   | 0 0   | 10.56 |
| IPRO03395      | 13 | 2833 8 7   | 0 0 | 2 1   | 1 0 | 2 1   | 2 1   | 10.14 |
| IPRO03689      | 13 | 1249 0 0   | 0 0 | 4 4   | 0 0 | 3 3   | 7 7   | 13.7  |
| IPRO03731      | 13 | 601 13 12  | 1 0 | 0 0   | 0 0 | 0 0   | 0 0   | 14.04 |
| IPRO03733      | 13 | 1060 9 7   | 1 1 | 4 3   | 0 0 | 1 0   | 0 0   | 22.73 |
| IPRO03838      | 13 | 6737 11 11 | 1 1 | 1 1   | 0 0 | 0 0   | 0 0   | 6.21  |
| IPRO04088      | 13 | 554 8 6    | 2 1 | 2 1   | 0 0 | 2 1   | 1 1   | 39.51 |
| IPRO04092      | 13 | 354 0 0    | 0 0 | 0 0   | 0 0 | 0 0   | 12 12 | 25.25 |
| IPRO04148      | 13 | 434 0 0    | 0 0 | 5 1   | 0 0 | 5 2   | 10 4  | 8.43  |
| IPRO05018      | 13 | 236 0 0    | 0 0 | 4 2   | 0 0 | 1 1   | 11 9  | 8.15  |
| IPRO05174      | 13 | 592 0 0    | 0 0 | 15 15 | 0 0 | 0 0   | 0 0   | 15.71 |
| IPRO05654      | 13 | 554 1 1    | 0 0 | 12 12 | 0 0 | 0 0   | 0 0   | 29.6  |
| IPRO06011      | 13 | 443 0 0    | 0 0 | 12 11 | 0 0 | 2 1   | 1 0   | 9.34  |
| IPRO06120      | 13 | 563 11 10  | 2 0 | 0 0   | 0 0 | 1 0   | 2 1   | 19.54 |
| IPRO06132      | 13 | 1834 4 3   | 1 0 | 2 1   | 1 0 | 9 2   | 8 1   | 30.76 |
| IPRO06598      | 13 | 288 0 0    | 0 0 | 4 4   | 0 0 | 7 7   | 2 2   | 15.96 |
| IPRO06633      | 13 | 235 4 3    | 7 6 | 1 1   | 0 0 | 0 0   | 3 3   | 15.51 |
| IPRO06685      | 13 | 2626 7 6   | 1 0 | 4 4   | 0 0 | 2 2   | 0 0   | 14.58 |
| IPRO06847      | 13 | 1331 12 9  | 0 0 | 0 0   | 3 0 | 0 0   | 0 0   | 20.25 |
| IPRO07695      | 13 | 920 4 1    | 3 0 | 8 4   | 2 0 | 6 2   | 4 1   | 37.38 |
| IPRO07863      | 13 | 3097 5 3   | 1 0 | 3 1   | 2 0 | 7 5   | 4 2   | 4.98  |
| IPRO08274      | 13 | 2350 11 6  | 1 0 | 6 1   | 0 0 | 5 0   | 7 2   | 11.11 |
| IPRO08754      | 13 | 98 8 8     | 0 0 | 0 0   | 0 0 | 1 1   | 5 5   | 31.59 |
| IPRO08859      | 13 | 76 4 3     | 0 0 | 0 0   | 0 0 | 0 0   | 11 10 | 66.79 |
| IPRO09970      | 13 | 53 13 13   | 0 0 | 0 0   | 0 0 | 0 0   | 0 0   | 56.23 |
| IPRO10277      | 13 | 403 11 11  | 0 0 | 2 2   | 0 0 | 0 0   | 0 0   | 7.78  |
| IPRO10611      | 13 | 536 13 13  | 0 0 | 0 0   | 0 0 | 0 0   | 0 0   | 33.99 |
| IPRO10715      | 13 | 54 15 15   | 0 0 | 0 0   | 0 0 | 0 0   | 0 0   | 23.71 |
| IPRO11608      | 13 | 1555 13 13 | 0 0 | 0 0   | 0 0 | 0 0   | 0 0   | 11.77 |
| IPRO11994      | 13 | 738 13 13  | 0 0 | 0 0   | 0 0 | 0 0   | 0 0   | 33.78 |
| IPRO13114      | 13 | 1240 9 9   | 0 0 | 4 4   | 0 0 | 0 0   | 0 0   | 26.23 |
| IPRO13264      | 13 | 814 14 14  | 0 0 | 0 0   | 0 0 | 0 0   | 0 0   | 35.24 |
| IPRO13651      | 13 | 727 9 8    | 2 1 | 1 0   | 1 0 | 3 2   | 1 0   | 16.56 |
| IPRO13955      | 13 | 195 0 0    | 1 0 | 12 10 | 1 0 | 2 0   | 3 1   | 19.81 |
| IPRO13977      | 13 | 1355 9 7   | 2 0 | 1 0   | 1 0 | 4 2   | 5 3   | 16.81 |
| IPRO14026      | 13 | 1395 5 2   | 3 0 | 8 6   | 2 0 | 3 1   | 2 0   | 31.59 |
| IPRO14774      | 13 | 530 9 7    | 6 4 | 0 0   | 0 0 | 0 0   | 0 0   | 15.69 |
| IPRO14790      | 13 | 769 2 0    | 2 0 | 11 9  | 2 0 | 2 0   | 3 1   | 20.56 |
| IPRO17881      | 13 | 181 10 10  | 0 0 | 0 0   | 0 0 | 0 0   | 3 3   | 35.5  |
| IPRO18980      | 13 | 410 0 0    | 0 0 | 2 0   | 0 0 | 0 0   | 13 11 | 19.89 |
| IPRO19574      | 13 | 878 13 6   | 6 0 | 3 0   | 1 0 | 3 0   | 3 0   | 36.99 |
| IPRO19887      | 13 | 395 11 9   | 4 2 | 0 0   | 0 0 | 0 0   | 0 0   | 20.36 |
| IPRO22041      | 13 | 64 0 0     | 0 0 | 3 3   | 0 0 | 10 10 | 0 0   | 20.95 |
| PF01936        | 13 | 633 5 5    | 0 0 | 2 2   | 1 1 | 4 4   | 2 2   | 12.67 |
| PF02309        | 13 | 407 0 0    | 0 0 | 14 14 | 0 0 | 0 0   | 0 0   | 27.53 |
| PF03188        | 13 | 172 0 0    | 0 0 | 7 6   | 0 0 | 3 2   | 4 3   | 11.21 |
| PF03712        | 13 | 127 8 7    | 0 0 | 4 0   | 0 0 | 0 0   | 6 2   | 19.95 |
| PF05154        | 13 | 539 10 10  | 0 0 | 0 0   | 0 0 | 0 0   | 3 3   | 21.13 |
| PF06458        | 13 | 373 14 14  | 0 0 | 0 0   | 0 0 | 0 0   | 0 0   | 16.91 |
| PTHR11389      | 13 | 831 0 0    | 0 0 | 2 1   | 1 0 | 4 2   | 10 8  | 19.87 |
| PTHR12558      | 13 | 51 11 8    | 0 0 | 2 0   | 0 0 | 4 1   | 3 0   | 5.28  |
| SMO0864        | 13 | 1684 4 2   | 2 0 | 4 2   | 2 0 | 2 1   | 4 2   | 32.84 |
| TIGR02481      | 13 | 84 13 13   | 0 0 | 0 0   | 0 0 | 0 0   | 0 0   | 16.32 |
| IPRO00121      | 14 | 1605 11 8  | 3 0 | 2 3   | 0 0 | 1 1   | 2 0   | 29.08 |
| IPRO00348      | 14 | 538 0 0    | 0 0 | 3 3   | 2 0 | 5 4   | 4 3   | 17.55 |
| IPRO00374      | 14 | 1176 5 5   | 0 0 | 3 3   | 0 0 | 6 6   | 0 0   | 15.68 |
| IPRO00409      | 14 | 350 0 0    | 0 0 | 6 4   | 2 1 | 3 0   | 7 4   | 34.56 |
| IPRO00550      | 14 | 840 7 5    | 1 0 | 8 7   | 1 0 | 2 0   | 0 0   | 32.8  |
| IPRO00738      | 14 | 260 0 0    | 0 0 | 5 3   | 0 0 | 3 0   | 11 8  | 29.52 |
| IPRO00760      | 14 | 2123 3 3   | 0 0 | 6 6   | 1 1 | 2 2   | 2 2   | 20.05 |
| IPRO00904      | 14 | 484 0 0    | 0 0 | 5 4   | 1 0 | 4 2   | 6 4   | 26.28 |
| IPRO01098      | 14 | 964 7 6    | 0 0 | 5 1   | 2 1 | 0 0   | 5 2   | 34.31 |
| IPRO01263      | 14 | 291 0 0    | 0 0 | 8 6   | 3 0 | 3 1   | 7 4   | 19.51 |
| IPRO01585      | 14 | 1127 11 11 | 0 0 | 2 2   | 0 0 | 0 0   | 1 1   | 27.21 |
| IPRO01607      | 14 | 519 1 1    | 0 0 | 5 2   | 2 0 | 4 1   | 7 4   | 23.49 |
| IPRO01774      | 14 | 128 0 0    | 0 0 | 0 0   | 0 0 | 0 0   | 15 15 | 40.63 |
| IPRO01804      | 14 | 2089 5 5   | 0 0 | 0 0   | 0 0 | 3 3   | 6 6   | 28.89 |
| IPRO02022      | 14 | 335 10 10  | 1 1 | 3 3   | 0 0 | 0 0   | 0 0   | 25.52 |
| IPRO02305      | 14 | 2129 3 2   | 0 0 | 6 5   | 1 0 | 3 2   | 4 4   | 17.72 |
| IPRO02495      | 14 | 1010 3 3   | 0 0 | 4 3   | 0 0 | 7 6   | 3 2   | 11.68 |
| IPRO02579      | 14 | 1001 10 9  | 1 0 | 2 2   | 0 0 | 1 1   | 2 2   | 44.62 |
| IPRO02646      | 14 | 1247 12 11 | 1 0 | 2 2   | 0 0 | 1 1   | 1 0   | 30.32 |
| IPRO02701      | 14 | 955 12 10  | 4 2 | 0 0   | 0 0 | 0 0   | 0 0   | 19.32 |
| IPRO02744      | 14 | 1083 9 4   | 6 3 | 4 0   | 2 0 | 0 0   | 1 1   | 23.57 |
| IPRO02861      | 14 | 154 0 0    | 0 0 | 1 1   | 0 0 | 0 0   | 14 14 | 20.91 |
| IPRO02902      | 14 | 1044 0 0   | 0 0 | 14 14 | 0 0 | 0 0   | 0 0   | 26.23 |
| IPRO02935      | 14 | 762 5 5    | 0 0 | 6 6   | 2 0 | 2 2   | 1 1   | 19.05 |
| IPRO03111      | 14 | 1267 6 4   | 2 0 | 2 0   | 1 0 | 5 1   | 0 0   | 15.42 |
| IPRO03121      | 14 | 173 0 0    | 0 0 | 12 10 | 0 0 | 2 0   | 3 2   | 20.66 |
| IPRO03123      | 14 | 151 0 0    | 0 0 | 0 0   | 1 0 | 7 6   | 7 5   | 11.24 |
| IPRO03245      | 14 | 415 0 0    | 0 0 | 14 14 | 0 0 | 0 0   | 0 0   | 30.01 |
| IPRO03673      | 14 | 2098 1 1   | 1 1 | 1 1   | 0 0 | 10 10 | 1 1   | 24.28 |
| IPRO03709      | 14 | 440 14 14  | 0 0 | 0 0   | 0 0 | 0 0   | 0 0   | 21.02 |
| IPRO04107      | 14 | 2092 11 10 | 2 1 | 3 2   | 0 0 | 0 0   | 0 0   | 14.92 |
| IPRO04113      | 14 | 2048 9 6   | 3 0 | 2 0   | 1 0 | 4 3   | 1 0   | 14.88 |
| IPRO04158      | 14 | 521 0 0    | 0 0 | 14 14 | 0 0 | 0 0   | 0 0   | 21.06 |
| IPRO04159      | 14 | 299 0 0    | 0 0 | 14 14 | 0 0 | 0 0   | 0 0   | 35.89 |
| IPRO04240      | 14 | 347 0 0    | 0 0 | 11 11 | 0 0 | 0 0   | 3 3   | 33.11 |
| IPRO04792      | 14 | 763 15 8   | 0 0 | 4 0   | 1 0 | 1 0   | 0 0   | 26.46 |
| IPRO05269      | 14 | 1049 7 7   | 0 0 | 7 7   | 0 0 | 0 0   | 0 0   | 24.26 |
| IPRO05818      | 14 | 465 0 0    | 0 0 | 10 10 | 0 0 | 1 1   | 4 4   | 22.49 |
| IPRO06108      | 14 | 2279 6 4   | 3 1 | 7 5   | 2 0 | 3 2   | 2 0   | 19.27 |
| IPRO06139      | 14 | 3139 6 4   | 1 0 | 1 0   | 7 5 | 3 3   | 3 3   | 23.66 |
| IPRO06166      | 14 | 304 2 1    | 4 1 | 2 1   | 2 1 | 3 2   | 6 4   | 15.9  |
| IPRO06560      | 14 | 120 0 0    | 0 0 | 1 1   | 0 0 | 1 1   | 13 9  | 43.28 |

|                |    |            |     |       |     |       |       |       |
|----------------|----|------------|-----|-------|-----|-------|-------|-------|
| IPR007624      | 14 | 2032 13 10 | 0 0 | 4 1   | 0 0 | 0 0   | 0 0   | 18.48 |
| IPR007641      | 14 | 1071 9 3   | 5 0 | 11 1  | 6 0 | 6 0   | 7 0   | 38.75 |
| IPR007645      | 14 | 1061 9 2   | 0 0 | 22 1  | 6 0 | 6 0   | 7 0   | 42.99 |
| IPR007653      | 14 | 969 14 13  | 0 0 | 0 0   | 0 0 | 0 0   | 1 0   | 28.42 |
| IPR007696      | 14 | 1416 6 1   | 3 0 | 9 4   | 2 0 | 7 3   | 5 2   | 14.51 |
| IPR008915      | 14 | 1575 11 10 | 1 0 | 3 3   | 0 0 | 0 0   | 0 0   | 20.25 |
| IPR008968      | 14 | 482 0 0    | 0 0 | 2 1   | 1 0 | 6 5   | 10 9  | 16.9  |
| IPR009543      | 14 | 119 0 0    | 0 0 | 6 6   | 0 0 | 2 1   | 6 5   | 13.53 |
| IPR009739      | 14 | 480 15 15  | 0 0 | 0 0   | 0 0 | 0 0   | 0 0   | 16.4  |
| IPR011084      | 14 | 159 0 0    | 1 0 | 9 7   | 2 0 | 3 2   | 1 0   | 20.96 |
| IPR011320      | 14 | 236 2 1    | 1 0 | 7 6   | 1 0 | 3 2   | 5 4   | 33.8  |
| IPR013036      | 14 | 40 14 14   | 0 0 | 0 0   | 0 0 | 0 0   | 0 0   | 23.69 |
| IPR013207      | 14 | 311 14 14  | 0 0 | 0 0   | 0 0 | 0 0   | 0 0   | 24.81 |
| IPR013693      | 14 | 321 14 14  | 0 0 | 0 0   | 0 0 | 0 0   | 0 0   | 27.32 |
| IPR013708      | 14 | 1155 11 6  | 2 0 | 3 0   | 0 0 | 8 3   | 0 0   | 28.62 |
| IPR013747      | 14 | 1525 13 10 | 2 1 | 3 0   | 1 0 | 0 0   | 0 0   | 24.22 |
| IPR013974      | 14 | 1270 13 12 | 1 0 | 0 0   | 0 0 | 0 0   | 2 1   | 12.42 |
| IPR013976      | 14 | 854 14 14  | 0 0 | 0 0   | 0 0 | 0 0   | 0 0   | 13.01 |
| IPR014020      | 14 | 196 0 0    | 0 0 | 6 4   | 3 0 | 0 0   | 9 7   | 13.57 |
| IPR015882      | 14 | 342 10 6   | 3 2 | 2 0   | 0 0 | 1 0   | 6 2   | 13.06 |
| IPR015890      | 14 | 1885 11 9  | 1 0 | 5 3   | 1 0 | 2 0   | 0 0   | 29.25 |
| IPR017892      | 14 | 80 0 0     | 0 0 | 1 0   | 0 0 | 1 0   | 14 13 | 29.8  |
| IPR017978      | 14 | 419 11 1   | 0 0 | 0 0   | 0 0 | 0 0   | 13 13 | 16.68 |
| IPR018164      | 14 | 1203 2 0   | 2 0 | 13 11 | 2 0 | 2 0   | 3 1   | 31.59 |
| IPR019410      | 14 | 551 0 0    | 0 0 | 7 7   | 2 2 | 2 2   | 3 3   | 15.23 |
| IPR019494      | 14 | 287 12 11  | 2 1 | 2 0   | 0 0 | 0 0   | 2 0   | 10.61 |
| IPR019759      | 14 | 2959 9 6   | 2 0 | 8 5   | 0 0 | 1 0   | 0 0   | 25.69 |
| IPR020059      | 14 | 566 2 1    | 1 0 | 6 2   | 1 0 | 4 0   | 8 4   | 29.13 |
| IPR020067      | 14 | 126 0 0    | 0 0 | 0 0   | 0 0 | 0 0   | 13 13 | 16.74 |
| PF00054        | 14 | 6 0 0      | 0 0 | 0 0   | 0 0 | 0 0   | 10 10 | 13.9  |
| PF02239        | 14 | 190 9 6    | 5 3 | 1 0   | 0 0 | 0 0   | 0 0   | 15.25 |
| PF07320        | 14 | 383 0 0    | 0 0 | 14 14 | 0 0 | 0 0   | 0 0   | 10.08 |
| PF0924         | 14 | 374 14 11  | 1 0 | 1 0   | 0 0 | 2 0   | 0 0   | 11.94 |
| PF10591        | 14 | 200 0 0    | 0 0 | 4 1   | 0 0 | 2 1   | 12 9  | 19.81 |
| PTHR10098      | 14 | 75 14 14   | 0 0 | 0 0   | 0 0 | 0 0   | 0 0   | 6.48  |
| PTHR10178-SF14 | 14 | 547 0 0    | 0 0 | 11 10 | 0 0 | 2 0   | 3 2   | 1.73  |
| PTHR11439      | 14 | 815 0 0    | 0 0 | 13 13 | 0 0 | 1 1   | 0 0   | 6.37  |
| PTHR13712      | 14 | 42 8 8     | 0 0 | 7 6   | 2 1 | 2 2   | 3 3   | 28.89 |
| TIGR02232      | 14 | 168 17 17  | 0 0 | 0 0   | 0 0 | 0 0   | 3 3   | 52.38 |
| TIGR03501      | 14 | 15 14 14   | 0 0 | 0 0   | 0 0 | 0 0   | 0 0   | 51.36 |
| IPR000022      | 15 | 1897 9 4   | 0 0 | 7 2   | 4 0 | 6 1   | 7 2   | 23.16 |
| IPR000294      | 15 | 163 0 0    | 0 0 | 0 0   | 0 0 | 0 0   | 13 13 | 38.64 |
| IPR000542      | 15 | 307 0 0    | 0 0 | 0 0   | 0 0 | 11 11 | 4 4   | 22.07 |
| IPR000582      | 15 | 435 3 2    | 0 0 | 7 6   | 2 1 | 2 1   | 6 4   | 28.89 |
| IPR000600      | 15 | 2229 13 13 | 0 0 | 1 1   | 0 0 | 0 0   | 1 1   | 19.62 |
| IPR000770      | 15 | 98 0 0     | 0 0 | 12 9  | 0 0 | 0 0   | 7 4   | 29.83 |
| IPR000861      | 15 | 56 0 0     | 0 0 | 0 0   | 0 0 | 7 3   | 12 8  | 21.16 |
| IPR001078      | 15 | 1925 6 2   | 2 0 | 13 9  | 2 0 | 2 0   | 2 0   | 29.24 |
| IPR001107      | 15 | 2930 9 8   | 1 0 | 0 0   | 0 0 | 4 2   | 4 2   | 14.6  |
| IPR001117      | 15 | 1228 9 6   | 0 0 | 2 0   | 0 0 | 0 0   | 3 1   | 16.98 |
| IPR001155      | 15 | 2078 11 8  | 3 0 | 1 1   | 1 0 | 3 3   | 0 0   | 26.54 |
| IPR001247      | 15 | 2563 7 1   | 2 0 | 9 3   | 1 0 | 4 3   | 6 0   | 20.02 |
| IPR001368      | 15 | 472 2 1    | 0 0 | 2 2   | 0 0 | 0 0   | 15 14 | 17.29 |
| IPR001373      | 15 | 484 0 0    | 0 0 | 6 4   | 1 0 | 5 3   | 8 6   | 14.64 |
| IPR001455      | 15 | 988 15 14  | 1 0 | 0 0   | 0 0 | 0 0   | 0 0   | 21.26 |
| IPR001461      | 15 | 1411 11 1  | 0 0 | 11 11 | 0 0 | 1 1   | 2 2   | 17.7  |
| IPR001510      | 15 | 144 0 0    | 0 0 | 6 1   | 5 1 | 4 1   | 9 3   | 33.32 |
| IPR001627      | 15 | 388 0 0    | 0 0 | 0 0   | 0 0 | 0 0   | 14 14 | 18.71 |
| IPR001995      | 15 | 33 5 5     | 0 0 | 0 0   | 0 0 | 3 3   | 7 7   | 29.68 |
| IPR002145      | 15 | 1077 14 13 | 2 1 | 0 0   | 0 0 | 0 0   | 0 0   | 17.43 |
| IPR002423      | 15 | 2324 0 0   | 7 5 | 1 0   | 7 4 | 0 0   | 5 2   | 26.79 |
| IPR003152      | 15 | 339 0 0    | 0 0 | 7 1   | 5 1 | 0 2   | 9 3   | 32.77 |
| IPR003169      | 15 | 205 0 0    | 0 0 | 9 9   | 1 1 | 4 4   | 2 2   | 25.27 |
| IPR003329      | 15 | 899 15 15  | 0 0 | 0 0   | 0 0 | 0 0   | 0 0   | 17.52 |
| IPR003423      | 15 | 6991 13 10 | 0 0 | 5 2   | 0 0 | 0 0   | 0 0   | 4.15  |
| IPR003441      | 15 | 957 0 0    | 0 0 | 15 15 | 0 0 | 0 0   | 0 0   | 34.22 |
| IPR003812      | 15 | 1105 17 14 | 3 0 | 0 0   | 0 0 | 0 0   | 0 0   | 13.75 |
| IPR003813      | 15 | 169 14 9   | 6 1 | 0 0   | 0 0 | 0 0   | 0 0   | 35.18 |
| IPR003889      | 15 | 49 0 0     | 0 0 | 12 8  | 0 0 | 1 0   | 4 0   | 15    |
| IPR003891      | 15 | 450 0 0    | 0 0 | 11 10 | 1 0 | 2 1   | 5 4   | 12.36 |
| IPR004136      | 15 | 1255 12 9  | 0 0 | 1 1   | 0 0 | 5 2   | 0 0   | 18.72 |
| IPR004179      | 15 | 164 0 0    | 2 0 | 10 5  | 3 0 | 5 1   | 9 4   | 6.47  |
| IPR005302      | 15 | 959 14 11  | 1 0 | 2 0   | 1 0 | 0 0   | 2 0   | 15.33 |
| IPR005475      | 15 | 3813 14 10 | 2 0 | 4 0   | 3 0 | 3 0   | 4 1   | 17.22 |
| IPR005482      | 15 | 2029 9 0   | 4 1 | 11 2  | 4 0 | 10 1  | 10 3  | 34.9  |
| IPR005824      | 15 | 2043 1 0   | 6 0 | 11 2  | 6 0 | 8 0   | 11 2  | 31.25 |
| IPR005845      | 15 | 2452 8 4   | 4 0 | 3 0   | 3 0 | 6 3   | 7 4   | 16.64 |
| IPR006186      | 15 | 1265 0 0   | 0 0 | 8 5   | 6 1 | 1 1   | 7 4   | 37.52 |
| IPR006501      | 15 | 585 0 0    | 0 0 | 15 15 | 0 0 | 0 0   | 0 0   | 12.11 |
| IPR006595      | 15 | 457 0 0    | 0 0 | 10 2  | 0 0 | 9 1   | 11 4  | 14.31 |
| IPR006596      | 15 | 890 5 4    | 6 5 | 1 0   | 1 0 | 3 1   | 4 2   | 15.42 |
| IPR007029      | 15 | 257 12 7   | 7 2 | 0 0   | 0 0 | 0 0   | 1 1   | 21.19 |
| IPR007329      | 15 | 754 15 15  | 0 0 | 0 0   | 0 0 | 0 0   | 0 0   | 17.91 |
| IPR007371      | 15 | 361 3 2    | 0 0 | 11 10 | 1 0 | 3 2   | 1 0   | 19.58 |
| IPR007487      | 15 | 376 15 11  | 0 0 | 0 0   | 0 0 | 0 0   | 0 0   | 18.88 |
| IPR008671      | 15 | 179 11 6   | 2 0 | 2 1   | 0 0 | 6 2   | 0 0   | 18.1  |
| IPR008893      | 15 | 251 9 8    | 0 0 | 7 2   | 2 0 | 3 0   | 6 1   | 17.64 |
| IPR009048      | 15 | 197 6 1    | 5 0 | 0 0   | 0 0 | 0 0   | 13 8  | 28.7  |
| IPR010822      | 15 | 146 15 15  | 0 0 | 0 0   | 0 0 | 0 0   | 0 0   | 5.64  |
| IPR011016      | 15 | 472 0 0    | 0 0 | 12 11 | 1 1 | 1 0   | 2 2   | 39.62 |
| IPR011711      | 15 | 4180 14 13 | 1 0 | 0 0   | 0 0 | 0 0   | 0 0   | 12.4  |
| IPR012309      | 15 | 718 6 3    | 2 0 | 9 5   | 2 0 | 4 1   | 5 2   | 20.59 |
| IPR013039      | 15 | 54 15 15   | 0 0 | 0 0   | 0 0 | 0 0   | 0 0   | 31.9  |
| IPR013042      | 15 | 52 15 15   | 0 0 | 0 0   | 0 0 | 0 0   | 0 0   | 28.19 |
| IPR013043      | 15 | 51 15 15   | 0 0 | 0 0   | 0 0 | 0 0   | 0 0   | 30.97 |
| IPR013108      | 15 | 1431 16 11 | 0 0 | 3 1   | 4 0 | 0 0   | 1 0   | 7.1   |
| IPR013121      | 15 | 501 3 0    | 0 0 | 6 2   | 0 0 | 8 6   | 6 2   | 15.97 |
| IPR013507      | 15 | 858 2 0    | 2 0 | 12 10 | 2 0 | 2 0   | 4 2   | 24.59 |
| IPR013519      | 15 | 980 12 11  | 0 0 | 0 0   | 0 0 | 0 0   | 4 3   | 27.95 |
| IPR013538      | 15 | 1083 14 14 | 0 0 | 1 0   | 1 0 | 1 0   | 1 0   | 9.37  |
| IPR013856      | 15 | 333 15 14  | 0 0 | 1 0   | 0 0 | 1 0   | 0 0   | 29.43 |
| IPR015083      | 15 | 84 16 16   | 0 0 | 0 0   | 0 0 | 0 0   | 0 0   | 44.06 |
| IPR015202      | 15 | 185 8 6    | 0 0 | 1 0   | 0 0 | 9 7   | 0 0   | 25.18 |
| IPR015359      | 15 | 225 0 0    | 0 0 | 3 0   | 2 0 | 4 0   | 15 11 | 16.87 |
| IPR017936      | 15 | 276 11 10  | 1 0 | 1 1   | 0 0 | 0 0   | 3 3   | 1.83  |
| IPR018316      | 15 | 1670 4 2   | 2 0 | 6 4   | 1 0 | 3 1   | 5 3   | 24.51 |
| IPR019248      | 15 | 53 10 9    | 6 5 | 0 0   | 0 0 | 0 0   | 0 0   | 24.3  |
| IPR019591      | 15 | 1002 7 1   | 7 2 | 4 0   | 4 0 | 4 4   | 0 0   | 46.77 |
| IPR019782      | 15 | 81 3 1     | 0 0 | 2 0   | 3 1 | 8 5   | 9 6   | 26.78 |
| IPR020058      | 15 | 1923 3 2   | 1 0 | 5 1   | 1 0 | 4 0   | 9 5   | 28.44 |
| IPR020422      | 15 | 593 2 2    | 0 0 | 3 3   | 4 3 | 3 1   | 6 4   | 23.7  |
| IPR021731      | 15 | 549 13 13  | 0 0 | 2 2   | 0 0 | 0 0   | 0 0   | 11.71 |
| PF01389        | 15 | 454 15 15  | 0 0 | 0 0   | 0 0 | 0 0   | 0 0   | 11.03 |
| PF02129        | 15 | 850 13 11  | 2 0 | 1 1   | 1 0 | 1 0   | 1 0   | 10.31 |
| PF02156        | 15 | 127 15 15  | 0 0 | 0 0   | 0 0 | 0 0   | 0 0   | 15.66 |
| PF03190        | 15 | 472 13 9   | 4 1 | 2 1   | 0 0 | 1 0   | 1 0   | 27.63 |
| PF07534        | 15 | 182 1 1    | 0 0 | 0 0   | 1 0 | 1 1   | 14 13 | 10.57 |
| PF12146        | 15 | 977 15 13  | 1 0 | 2 1   | 1 0 | 0 0   | 0 0   | 15.11 |
| PTHR12697      | 15 | 129 13 13  | 0 0 | 0 0   | 0 0 | 2 2   | 0 0   | 7.25  |
| TIGR02601      | 15 | 716 15 15  | 0 0 | 0 0   | 0 0 | 0 0   | 0 0   | 50.74 |
| TIGR03661      | 15 | 120 15 15  | 0 0 | 0 0   | 0 0 | 0 0   | 0 0   | 28.4  |
| IPR000261      | 16 | 630 1 1    | 0 0 | 2 1   | 1 0 | 8 5   | 9 5   | 23.42 |
| IPR000286      | 16 | 1323 2 2   | 0 0 | 10 10 | 1 1 | 2 1   | 3 2   | 23.33 |
| IPR000300      | 16 | 356 0 0    | 0 0 | 7 6   | 1 0 | 3 2   | 9 7   | 27.05 |
| IPR000375      | 16 | 457 0 0    | 0 0 | 8 4   | 2 0 | 10 7  | 3 0   | 13.89 |
| IPR000432      | 16 | 1608 6 1   | 4 1 | 10 5  | 2 0 | 5 2   | 3 2   | 43.41 |
| IPR000536      | 16 | 1341 0 0   | 0 0 | 0 0   | 0 0 | 0 0   | 17 17 | 8.74  |
| IPR000538      | 16 | 213 0 0    | 0 0 | 1 1   | 0 0 | 0 0   | 15 15 | 38.01 |
| IPR000722      | 16 | 1006 10 3  | 4 0 | 13 5  | 5 0 | 5 0   | 5 0   | 47.1  |
| IPR001077      | 16 | 851 6 6    | 0 0 | 4 3   | 0 0 | 6 5   | 2 1   | 13.9  |
| IPR001137      | 16 | 78 14 12   | 0 0 | 3 1   | 0 0 | 1 1   | 0 0   | 47.23 |
| IPR001283      | 16 | 895 11 1   | 0 0 | 3 3   | 0 0 | 1 0   | 12 11 | 23.91 |
| IPR001570      | 16 | 344 16 15  | 0 0 | 1 0   | 0 0 | 1 0   | 0 0   | 30.56 |
| IPR001590      | 16 | 511 2 2    | 1 0 | 1 0   | 0 0 | 4 1   | 12 9  | 18.25 |
| IPR001594      | 16 | 1014 0 0   | 0 0 | 10 9  | 1 0 | 3 2   | 6 5   | 37.98 |
| IPR001678      | 16 | 1508 1 0   | 2 0 | 7 5   | 1 0 | 3 3   | 7 6   | 24.5  |
| IPR001734      | 16 | 2455 12 12 | 0 0 | 1 1   | 0 0 | 0 0   | 0 0   | 10.95 |
| IPR001851      | 16 | 6961 12 9  | 0 0 | 7 4   | 0 0 | 0 0   | 0 0   | 15.24 |
| IPR001977      | 16 | 879 14 13  | 0 0 | 0 0   | 0 0 | 2 2   | 1 0   | 28.89 |
| IPR002102      | 16 | 77 15 15   | 1 1 | 0 0   | 0 0 | 0 0   | 0 0   | 15    |
| IPR002129      | 16 | 1202 6 6   | 0 0 | 4 4   | 0 0 | 2 2   | 3 3   | 14.41 |
| IPR002201      | 16 | 1290       |     |       |     |       |       |       |

|                |    |            |     |       |     |       |       |       |
|----------------|----|------------|-----|-------|-----|-------|-------|-------|
| IPR003126      | 16 | 202 0 0    | 0 0 | 5 1   | 0 0 | 3 1   | 11 7  | 29.96 |
| IPR003251      | 16 | 897 15 13  | 4 2 | 0 0   | 0 0 | 0 0   | 0 0   | 11.44 |
| IPR003333      | 16 | 880 9 9    | 0 0 | 4 4   | 0 0 | 3 3   | 0 0   | 26    |
| IPR003769      | 16 | 611 0 0    | 0 0 | 11 11 | 0 0 | 1 2   | 2 0   | 25.44 |
| IPR003888      | 16 | 49 0 0     | 0 0 | 12 7  | 0 0 | 1 0   | 5 0   | 25.07 |
| IPR004100      | 16 | 2457 3 0   | 3 0 | 10 7  | 3 0 | 9 6   | 3 0   | 19.82 |
| IPR004263      | 16 | 530 4 4    | 0 0 | 12 12 | 0 0 | 0 0   | 0 0   | 17.76 |
| IPR004939      | 16 | 111 0 0    | 0 0 | 0 0   | 0 0 | 1 1   | 15 15 | 27.51 |
| IPR005119      | 16 | 18141 9 8  | 0 0 | 8 7   | 0 0 | 1 0   | 0 0   | NA    |
| IPR005132      | 16 | 842 11 10  | 0 0 | 2 1   | 0 0 | 4 3   | 0 0   | 29.46 |
| IPR005144      | 16 | 1523 14 8  | 7 1 | 2 0   | 2 0 | 2 0   | 3 1   | 18.09 |
| IPR005476      | 16 | 3322 15 7  | 6 0 | 5 1   | 2 0 | 2 0   | 2 0   | 17.84 |
| IPR005844      | 16 | 2574 9 5   | 4 0 | 3 0   | 3 0 | 6 3   | 7 4   | 20.88 |
| IPR006048      | 16 | 853 14 9   | 5 0 | 3 1   | 0 0 | 3 1   | 3 0   | 19.5  |
| IPR006260      | 16 | 1323 15 15 | 0 0 | 1 1   | 0 0 | 0 0   | 0 0   | 14.65 |
| IPR006531      | 16 | 862 16 15  | 0 0 | 2 1   | 0 0 | 0 0   | 0 0   | 24.23 |
| IPR006552      | 16 | 24 0 0     | 0 0 | 0 0   | 0 0 | 0 0   | 16 16 | 39.42 |
| IPR006689      | 16 | 384 0 0    | 0 0 | 8 8   | 0 0 | 2 2   | 5 5   | 18.25 |
| IPR007066      | 16 | 1128 11 3  | 5 0 | 13 4  | 6 0 | 6 0   | 7 1   | 25.72 |
| IPR007083      | 16 | 1057 11 6  | 5 0 | 9 3   | 6 0 | 6 0   | 7 1   | 32.75 |
| IPR007120      | 16 | 1091 9 3   | 5 0 | 13 3  | 6 0 | 6 0   | 7 0   | 42.74 |
| IPR007644      | 16 | 1067 9 5   | 5 0 | 12 5  | 6 0 | 6 0   | 6 0   | 29.59 |
| IPR007751      | 16 | 264 7 4    | 0 0 | 2 1   | 0 0 | 10 7  | 1 0   | 15.24 |
| IPR007934      | 16 | 46 9 8     | 0 0 | 0 0   | 0 0 | 1 0   | 7 7   | 25.62 |
| IPR008211      | 16 | 220 0 0    | 0 0 | 0 0   | 0 0 | 0 0   | 16 16 | 30.26 |
| IPR008847      | 16 | 114 0 0    | 0 0 | 7 4   | 0 0 | 4 1   | 8 5   | 18.85 |
| IPR010909      | 16 | 118 0 0    | 0 0 | 5 0   | 0 0 | 0 0   | 16 16 | 38.01 |
| IPR011108      | 16 | 1192 8 5   | 5 2 | 9 5   | 4 0 | 4 0   | 4 0   | 23.41 |
| IPR011112      | 16 | 793 11 9   | 0 0 | 1 1   | 0 0 | 1 1   | 5 3   | 29.47 |
| IPR011459      | 16 | 91 13 10   | 5 2 | 0 0   | 1 1 | 0 0   | 0 0   | 20.79 |
| IPR011620      | 16 | 398 15 14  | 2 1 | 0 0   | 0 0 | 0 0   | 0 0   | 17.61 |
| IPR012308      | 16 | 412 4 2    | 5 2 | 10 5  | 2 2 | 9 4   | 0 0   | 12.49 |
| IPR013515      | 16 | 225 15 8   | 0 0 | 6 0   | 0 0 | 5 0   | 0 0   | 21.75 |
| IPR013654      | 16 | 221 14 8   | 0 0 | 6 1   | 0 0 | 5 0   | 0 0   | 19.76 |
| IPR014048      | 16 | 1408 13 12 | 3 2 | 0 0   | 0 0 | 2 1   | 1 0   | 36.36 |
| IPR014782      | 16 | 1595 10 6  | 2 0 | 4 2   | 1 0 | 4 3   | 4 2   | 15.86 |
| IPR014805      | 16 | 75 0 0     | 0 0 | 6 6   | 0 0 | 6 6   | 1 1   | 22.87 |
| IPR018031      | 16 | 155 0 0    | 0 0 | 0 0   | 0 0 | 0 0   | 16 16 | 24.02 |
| PF0637         | 16 | 227 0 0    | 0 0 | 10 2  | 9 1 | 11 1  | 10 0  | 10.04 |
| PF06739        | 16 | 212 12 12  | 5 5 | 0 0   | 0 0 | 0 0   | 0 0   | 33.24 |
| PF07819        | 16 | 396 7 7    | 0 0 | 2 2   | 0 0 | 8 8   | 0 0   | 14.16 |
| PF08433        | 16 | 230 5 5    | 0 0 | 3 3   | 0 0 | 1 1   | 7 7   | 11.41 |
| PTHR017078     | 16 | 201 0 0    | 0 0 | 18 16 | 0 0 | 2 1   | 3 1   | 4.21  |
| PTHR08937      | 16 | 168 13 13  | 0 0 | 2 2   | 0 0 | 0 0   | 1 1   | 4.05  |
| PTHR19328      | 16 | 25 16 16   | 0 0 | 0 0   | 0 0 | 0 0   | 0 0   | 12.86 |
| PTHR23083-SF23 | 16 | 105 14 12  | 1 1 | 1 0   | 0 0 | 2 1   | 0 0   | 11.85 |
| PTHR23224      | 16 | 300 0 0    | 0 0 | 2 1   | 0 0 | 4 3   | 12 11 | 17.99 |
| IPR000322      | 17 | 789 12 11  | 0 0 | 3 2   | 2 2 | 2 2   | 2 2   | 21.7  |
| IPR000573      | 17 | 1783 3 2   | 1 0 | 2 1   | 1 0 | 13 12 | 1 0   | 27.82 |
| IPR000673      | 17 | 969 18 11  | 0 0 | 0 0   | 0 0 | 0 0   | 0 0   | 28.87 |
| IPR000728      | 17 | 3469 12 5  | 3 0 | 5 2   | 1 0 | 6 1   | 7 2   | 18.11 |
| IPR000949      | 17 | 233 0 0    | 0 0 | 6 3   | 1 0 | 5 2   | 12 8  | 20.94 |
| IPR001208      | 17 | 658 1 1    | 1 1 | 8 7   | 1 0 | 5 4   | 4 3   | 34.05 |
| IPR001360      | 17 | 1444 6 6   | 0 0 | 9 9   | 0 0 | 2 2   | 0 0   | 29.41 |
| IPR001909      | 17 | 1488 0 0   | 0 0 | 0 0   | 0 0 | 0 0   | 18 18 | 41.15 |
| IPR001936      | 17 | 365 0 0    | 0 0 | 0 0   | 0 0 | 0 2   | 13 9  | 11.89 |
| IPR002075      | 17 | 547 4 4    | 0 0 | 6 5   | 0 0 | 5 3   | 5 3   | 11.16 |
| IPR002491      | 17 | 2664 16 13 | 3 0 | 2 2   | 0 0 | 0 0   | 0 0   | 7.99  |
| IPR002563      | 17 | 1670 17 16 | 0 0 | 1 0   | 0 0 | 0 0   | 0 0   | 12.7  |
| IPR002656      | 17 | 2484 13 12 | 0 0 | 0 0   | 0 0 | 1 0   | 7 7   | 9.36  |
| IPR002857      | 17 | 143 0 0    | 0 0 | 0 0   | 0 0 | 0 0   | 17 17 | 43.06 |
| IPR003100      | 17 | 472 0 0    | 0 0 | 16 9  | 0 0 | 4 0   | 9 2   | 13.36 |
| IPR003156      | 17 | 2240 14 11 | 4 1 | 4 2   | 2 0 | 2 0   | 3 0   | 13.72 |
| IPR003356      | 17 | 1250 17 13 | 4 0 | 0 0   | 0 0 | 0 0   | 0 0   | 17.67 |
| IPR003362      | 17 | 1231 14 14 | 0 0 | 3 3   | 0 0 | 0 0   | 0 0   | 38.19 |
| IPR003579      | 17 | 2088 0 0   | 0 0 | 4 4   | 0 0 | 2 2   | 11 11 | 39.21 |
| IPR003597      | 17 | 2603 0 0   | 0 0 | 0 0   | 0 0 | 0 0   | 17 17 | 21.58 |
| IPR003958      | 17 | 689 0 0    | 0 0 | 7 7   | 1 1 | 10 10 | 1 1   | 22.53 |
| IPR004013      | 17 | 500 15 14  | 0 0 | 2 1   | 0 0 | 1 1   | 0 0   | 10.44 |
| IPR004846      | 17 | 1224 14 13 | 0 0 | 4 3   | 0 0 | 0 0   | 0 0   | 21.71 |
| IPR005025      | 17 | 2362 11 10 | 1 0 | 1 1   | 0 0 | 1 1   | 0 0   | 10.25 |
| IPR005064      | 17 | 1895 3 3   | 0 0 | 14 14 | 0 0 | 0 0   | 0 0   | 27.13 |
| IPR005083      | 17 | 1230 5 5   | 0 0 | 2 2   | 0 0 | 5 5   | 2 2   | 17.73 |
| IPR006119      | 17 | 1880 17 13 | 3 0 | 2 1   | 0 0 | 0 0   | 0 0   | 15.35 |
| IPR006137      | 17 | 1533 13 9  | 4 0 | 6 5   | 0 0 | 0 0   | 0 0   | 25.95 |
| IPR006204      | 17 | 2492 7 4   | 3 1 | 8 5   | 2 0 | 5 3   | 4 1   | 21.57 |
| IPR007080      | 17 | 1090 11 3  | 4 0 | 13 4  | 6 0 | 6 0   | 7 1   | 32.29 |
| IPR007526      | 17 | 318 0 0    | 0 0 | 8 5   | 1 0 | 6 3   | 6 4   | 14.5  |
| IPR007728      | 17 | 205 0 0    | 0 0 | 10 7  | 3 0 | 0 0   | 11 8  | 21.61 |
| IPR008278      | 17 | 1318 8 5   | 0 0 | 0 0   | 1 1 | 7 4   | 4 4   | 22.43 |
| IPR008613      | 17 | 201 17 16  | 1 0 | 0 0   | 0 0 | 0 0   | 0 0   | 34.94 |
| IPR009818      | 17 | 239 0 0    | 0 0 | 8 6   | 0 0 | 0 0   | 13 11 | 43.78 |
| IPR009959      | 17 | 838 13 13  | 0 0 | 3 3   | 0 0 | 1 1   | 0 0   | 3.73  |
| IPR011017      | 17 | 348 7 5    | 9 6 | 4 4   | 0 0 | 0 0   | 3 2   | 29.23 |
| IPR011095      | 17 | 1065 15 12 | 2 0 | 0 0   | 2 1 | 0 0   | 0 0   | 24.25 |
| IPR011616      | 17 | 217 1 1    | 1 1 | 10 9  | 0 0 | 5 4   | 1 1   | 17.97 |
| IPR012951      | 17 | 651 6 5    | 1 0 | 6 5   | 0 0 | 7 6   | 0 0   | 34.18 |
| IPR013112      | 17 | 575 5 2    | 0 0 | 6 2   | 1 0 | 8 6   | 6 2   | 24.75 |
| IPR013122      | 17 | 174 0 0    | 0 0 | 5 2   | 0 0 | 2 2   | 15 12 | 13.85 |
| IPR013200      | 17 | 2448 12 12 | 0 0 | 5 1   | 2 1 | 3 0   | 3 0   | 14.75 |
| IPR013534      | 17 | 855 8 6    | 0 0 | 6 5   | 2 0 | 0 5   | 0 0   | 18.99 |
| IPR013702      | 17 | 271 12 11  | 2 1 | 5 3   | 0 0 | 0 0   | 2 0   | 8.3   |
| IPR013750      | 17 | 2066 6 3   | 3 1 | 10 7  | 2 0 | 3 1   | 5 2   | 8.17  |
| IPR015414      | 17 | 2807 11 10 | 0 0 | 5 4   | 1 1 | 0 0   | 1 1   | 11.42 |
| IPR017923      | 17 | 210 0 0    | 0 0 | 7 4   | 3 0 | 10 6  | 6 3   | 21.55 |
| IPR018516      | 17 | 80 0 0     | 0 0 | 11 5  | 0 0 | 0 0   | 9 3   | 21.97 |
| IPR018518      | 17 | 84 0 0     | 0 0 | 11 5  | 0 0 | 0 0   | 9 3   | 27.73 |
| IPR020946      | 17 | 1353 10 4  | 0 0 | 4 1   | 0 0 | 10 6  | 0 0   | 20.85 |
| IPR021796      | 17 | 204 17 17  | 0 0 | 0 0   | 0 0 | 0 0   | 0 0   | 11.02 |
| PF07725        | 17 | 318 0 0    | 0 0 | 19 19 | 0 0 | 0 0   | 0 0   | 49.52 |
| PF09699        | 17 | 703 18 18  | 0 0 | 0 0   | 0 0 | 0 0   | 0 0   | 33.01 |
| IPR000362      | 18 | 2993 9 4   | 7 4 | 1 0   | 1 0 | 4 1   | 6 4   | 17.63 |
| IPR000462      | 18 | 2360 7 7   | 1 1 | 5 5   | 1 1 | 2 2   | 2 2   | 16.84 |
| IPR000572      | 18 | 1033 11 9  | 3 1 | 6 2   | 0 0 | 5 1   | 2 0   | 18.34 |
| IPR000583      | 18 | 3670 8 2   | 8 2 | 10 3  | 6 0 | 10 3  | 8 1   | 23.89 |
| IPR000800      | 18 | 174 0 0    | 0 0 | 0 0   | 0 0 | 0 0   | 19 19 | 37.53 |
| IPR000891      | 18 | 2548 12 5  | 5 1 | 7 0   | 0 0 | 9 3   | 5 0   | 16.6  |
| IPR001126      | 18 | 1536 8 6   | 0 0 | 7 0   | 0 0 | 1 5   | 4 2   | 16.73 |
| IPR001313      | 18 | 2308 0 0   | 0 0 | 14 13 | 1 0 | 3 2   | 3 1   | 17.01 |
| IPR001347      | 18 | 5302 16 10 | 3 1 | 4 0   | 1 0 | 2 0   | 2 1   | 9.93  |
| IPR001628      | 18 | 1416 0 0   | 0 0 | 0 0   | 0 0 | 0 0   | 21 21 | 44.85 |
| IPR001818      | 18 | 165 12 12  | 1 1 | 1 0   | 0 0 | 1 1   | 4 3   | 13.41 |
| IPR001905      | 18 | 1318 13 12 | 1 0 | 5 5   | 0 0 | 0 0   | 0 0   | 29.54 |
| IPR002528      | 18 | 5166 3 2   | 1 0 | 0 0   | 0 0 | 0 0   | 1 1   | 3.57  |
| IPR003033      | 18 | 831 15 13  | 0 0 | 0 0   | 0 0 | 0 0   | 5 3   | 7.47  |
| IPR003342      | 18 | 945 15 15  | 0 0 | 0 0   | 0 0 | 2 1   | 1 0   | 6.49  |
| IPR003602      | 18 | 1395 15 7  | 6 0 | 8 2   | 4 0 | 4 0   | 6 1   | 28.87 |
| IPR003645      | 18 | 136 0 0    | 0 0 | 0 0   | 0 0 | 0 0   | 17 17 | 39.24 |
| IPR003819      | 18 | 1046 9 7   | 0 0 | 0 0   | 0 0 | 8 6   | 4 3   | 10.89 |
| IPR003890      | 18 | 591 0 0    | 0 0 | 11 7  | 1 0 | 7 3   | 8 4   | 9.04  |
| IPR003892      | 18 | 387 0 0    | 0 0 | 6 5   | 0 0 | 7 5   | 8 5   | 16.87 |
| IPR004012      | 18 | 302 0 0    | 0 0 | 0 0   | 2 1 | 0 0   | 21 20 | 13.46 |
| IPR004364      | 18 | 2792 7 5   | 1 0 | 6 5   | 2 1 | 4 1   | 4 2   | 24.17 |
| IPR005074      | 18 | 555 18 18  | 0 0 | 0 0   | 0 0 | 0 0   | 0 0   | 16.47 |
| IPR005112      | 18 | 257 0 0    | 0 0 | 5 0   | 0 0 | 4 2   | 14 9  | 16.66 |
| IPR005123      | 18 | 1974 0 0   | 0 0 | 9 9   | 0 0 | 4 6   | 4 4   | 24.86 |
| IPR006569      | 18 | 361 0 0    | 0 0 | 9 6   | 2 0 | 7 5   | 6 3   | 14.4  |
| IPR006574      | 18 | 336 0 0    | 0 0 | 0 0   | 0 0 | 0 0   | 19 19 | 30.11 |
| IPR006671      | 18 | 295 0 0    | 0 0 | 7 5   | 2 1 | 7 7   | 5 4   | 6.12  |
| IPR007138      | 18 | 1644 17 17 | 1 1 | 0 0   | 0 0 | 0 0   | 1 1   | 7.87  |
| IPR007409      | 18 | 831 20 12  | 0 0 | 0 0   | 0 0 | 0 0   | 0 0   | 16.61 |
| IPR010432      | 18 | 855 16 16  | 2 2 | 0 0   | 0 0 | 0 0   | 0 0   | 10.61 |
| IPR010569      | 18 | 271 0 0    | 0 0 | 1 0   | 0 0 | 1 0   | 15 13 | 29.51 |
| IPR010918      | 18 | 3723 12 5  | 4 1 | 5 2   | 1 0 | 6 1   | 7 2   | 11.13 |
| IPR011424      | 18 | 668 0 0    | 0 0 | 14 13 | 0 0 | 3 3   | 4 3   | 37.01 |
| IPR011607      | 18 | 1891 13 7  | 4 0 | 5 1   | 5 0 | 9 1   | 9 1   | 24.88 |
| IPR013594      | 18 | 237 0 0    | 0 0 | 6 2   | 4 0 | 6 2   | 6 2   | 11.46 |
| IPR013602      | 18 | 362 0 0    | 0 0 | 9 5   | 5 1 | 5 1   | 7 3   | 19.15 |
| IPR013899      | 18 | 138 0 0    | 0 0 | 11 10 | 3 2 | 3 1   | 4 2   | 22.96 |
| IPR013994      | 18 | 67 0 0     | 0 0 | 0 0   | 0 0 | 7 7   | 11 11 | 29.7  |
| IPR014876      | 18 | 226 0 0    | 0 0 | 9 6   | 1 0 | 6 4   | 6 4   |       |

|                |    |             |      |       |     |       |       |       |
|----------------|----|-------------|------|-------|-----|-------|-------|-------|
| PTHR13824      | 18 | 293 3 3     | 0 0  | 2 1   | 2 2 | 1 1   | 7 6   | 9.79  |
| PTHR19446-SF34 | 18 | 751 0 0     | 0 0  | 18 18 | 0 0 | 0 0   | 0 0   | 4.37  |
| PTHR23083-SF20 | 18 | 138 15 14   | 2 1  | 0 0   | 0 0 | 0 0   | 3 2   | 5.32  |
| IPR000111      | 19 | 443 14 12   | 0 0  | 1 0   | 0 0 | 8 6   | 0 0   | 21.16 |
| IPR000594      | 19 | 2400 8 5    | 3 1  | 9 3   | 6 0 | 8 2   | 8 2   | 21.73 |
| IPR000606      | 19 | 504 14 11   | 1 0  | 3 2   | 1 1 | 2 0   | 3 1   | 16.66 |
| IPR000847      | 19 | 18471 13 11 | 3 1  | 6 5   | 0 0 | 0 0   | 1 0   | 27.56 |
| IPR000906      | 19 | 167 2 2     | 2 2  | 0 0   | 0 0 | 0 0   | 16 16 | 28.22 |
| IPR000923      | 19 | 482 15 14   | 5 4  | 0 0   | 0 0 | 0 0   | 0 0   | 20.47 |
| IPR001030      | 19 | 2144 3 1    | 2 0  | 4 2   | 1 0 | 14 13 | 1 0   | 26.49 |
| IPR001048      | 19 | 4325 14 4   | 2 0  | 12 3  | 0 0 | 6 1   | 3 0   | 14.14 |
| IPR001180      | 19 | 341 0 0     | 0 0  | 5 2   | 3 0 | 6 2   | 13 9  | 9.5   |
| IPR001190      | 19 | 40 4 4      | 0 0  | 7 6   | 0 0 | 0 0   | 9 8   | 11.43 |
| IPR001264      | 19 | 2250 12 10  | 0 0  | 9 7   | 0 0 | 0 0   | 0 0   | 31.49 |
| IPR001300      | 19 | 691 2 2     | 0 0  | 2 2   | 0 0 | 1 0   | 11 10 | 16.2  |
| IPR001460      | 19 | 3837 15 12  | 0 0  | 7 4   | 0 0 | 0 0   | 0 0   | 20.66 |
| IPR002053      | 19 | 249 19 19   | 0 0  | 0 0   | 0 0 | 0 0   | 0 0   | 13.66 |
| IPR002068      | 19 | 2320 2 2    | 0 0  | 6 6   | 0 0 | 9 9   | 4 4   | 21.56 |
| IPR002792      | 19 | 2032 14 10  | 5 2  | 3 1   | 2 0 | 1 0   | 5 2   | 13.69 |
| IPR003107      | 19 | 957 0 0     | 0 0  | 11 4  | 1 0 | 8 3   | 9 3   | 24.1  |
| IPR003151      | 19 | 297 0 0     | 0 0  | 10 4  | 5 1 | 11 5  | 0 0   | 8.18  |
| IPR003340      | 19 | 859 0 0     | 0 0  | 19 19 | 0 0 | 0 0   | 0 0   | 13.38 |
| IPR003749      | 19 | 1460 14 11  | 4 1  | 2 2   | 0 0 | 1 1   | 0 0   | 18    |
| IPR003886      | 19 | 80 2 2      | 0 0  | 0 0   | 0 0 | 0 0   | 17 17 | 27.27 |
| IPR004331      | 19 | 471 0 0     | 0 0  | 9 5   | 5 1 | 12 7  | 1 0   | 16.19 |
| IPR005150      | 19 | 418 3 3     | 0 0  | 17 17 | 0 0 | 0 0   | 0 0   | 29.92 |
| IPR005490      | 19 | 2266 19 19  | 0 0  | 0 0   | 0 0 | 0 0   | 0 0   | 15.65 |
| IPR005502      | 19 | 501 17 17   | 1 1  | 0 0   | 0 0 | 0 0   | 1 1   | 14.19 |
| IPR005797      | 19 | 2430 16 15  | 2 1  | 2 1   | 1 0 | 1 0   | 4 3   | 11.94 |
| IPR006020      | 19 | 616 0 0     | 0 0  | 0 0   | 0 0 | 0 0   | 20 20 | 12.99 |
| IPR006021      | 19 | 1022 15 12  | 4 1  | 3 2   | 1 0 | 1 0   | 1 0   | 18.04 |
| IPR006115      | 19 | 2495 15 14  | 5 4  | 2 1   | 4 2 | 3 2   | 3 2   | 22.34 |
| IPR006151      | 19 | 1695 16 9   | 5 0  | 5 1   | 0 0 | 8 3   | 0 0   | 18.52 |
| IPR007569      | 19 | 322 19 19   | 0 0  | 0 0   | 0 0 | 0 0   | 0 0   | 20.61 |
| IPR008757      | 19 | 141 19 19   | 0 0  | 0 0   | 0 0 | 0 0   | 0 0   | 28.03 |
| IPR011489      | 19 | 148 0 0     | 0 0  | 0 0   | 0 0 | 0 0   | 18 18 | 22.87 |
| IPR011528      | 19 | 346 18 18   | 1 1  | 0 0   | 0 0 | 0 0   | 0 0   | 9     |
| IPR011622      | 19 | 301 19 19   | 0 0  | 0 0   | 0 0 | 0 0   | 0 0   | 8.86  |
| IPR011625      | 19 | 464 11 6    | 5 0  | 1 1   | 0 0 | 0 0   | 11 6  | 12.22 |
| IPR011626      | 19 | 221 8 3     | 6 1  | 0 0   | 0 0 | 0 0   | 14 9  | 23.26 |
| IPR011645      | 19 | 216 12 11   | 0 0  | 2 0   | 0 0 | 0 0   | 8 6   | 28.01 |
| IPR012000      | 19 | 2759 6 4    | 3 1  | 4 2   | 0 0 | 11 9  | 2 0   | 19.92 |
| IPR012902      | 19 | 2594 17 16  | 0 0  | 4 3   | 0 0 | 0 0   | 0 0   | 61.89 |
| IPR013162      | 19 | 850 0 0     | 0 0  | 0 0   | 0 0 | 0 0   | 20 20 | 10.29 |
| IPR013587      | 19 | 230 14 12   | 0 0  | 6 4   | 0 0 | 0 0   | 2 2   | 8.38  |
| IPR013624      | 19 | 250 20 20   | 0 0  | 0 0   | 0 0 | 0 0   | 0 0   | 29.03 |
| IPR018061      | 19 | 285 1 1     | 0 0  | 4 0   | 0 0 | 1 0   | 19 14 | 14.09 |
| IPR018933      | 19 | 201 0 0     | 0 0  | 0 0   | 0 0 | 0 0   | 18 18 | 15.77 |
| PF03564        | 19 | 210 0 0     | 0 0  | 1 1   | 0 0 | 0 0   | 18 18 | 12.93 |
| PF07581        | 19 | 157 16 16   | 3 3  | 0 0   | 0 0 | 0 0   | 0 0   | 39.08 |
| PF12003        | 19 | 111 0 0     | 0 0  | 0 0   | 0 0 | 0 0   | 19 19 | 18.56 |
| IPR000194      | 20 | 1487 5 2    | 3 0  | 15 13 | 2 0 | 5 3   | 2 0   | 39.58 |
| IPR000562      | 20 | 153 0 0     | 0 0  | 0 0   | 0 0 | 0 0   | 20 20 | 43.03 |
| IPR000999      | 20 | 1463 3 2    | 1 0  | 11 4  | 0 0 | 9 2   | 11 6  | 22.07 |
| IPR001034      | 20 | 2051 15 13  | 3 1  | 5 4   | 0 0 | 0 0   | 0 0   | 30.02 |
| IPR001194      | 20 | 335 0 0     | 0 0  | 7 2   | 0 0 | 4 2   | 14 9  | 19.08 |
| IPR001212      | 20 | 280 3 3     | 0 0  | 1 1   | 0 0 | 0 0   | 14 14 | 38.7  |
| IPR001453      | 20 | 2585 13 11  | 2 0  | 6 3   | 0 0 | 5 3   | 3 0   | 18.56 |
| IPR001496      | 20 | 491 0 0     | 0 0  | 0 0   | 0 0 | 0 0   | 20 20 | 27.29 |
| IPR001667      | 20 | 1757 15 12  | 6 3  | 2 1   | 1 0 | 1 0   | 3 1   | 13.47 |
| IPR001701      | 20 | 359 15 12   | 0 0  | 6 6   | 3 0 | 0 0   | 0 0   | 26.29 |
| IPR001711      | 20 | 282 2 2     | 0 0  | 4 1   | 3 0 | 4 0   | 17 13 | 31.2  |
| IPR002165      | 20 | 206 0 0     | 0 0  | 0 0   | 0 0 | 0 0   | 19 19 | 32.36 |
| IPR002300      | 20 | 3408 8 3    | 2 0  | 8 3   | 3 0 | 8 4   | 13 7  | 25.32 |
| IPR003480      | 20 | 996 0 0     | 0 0  | 14 14 | 0 0 | 7 7   | 0 0   | 9.36  |
| IPR003649      | 20 | 151 0 0     | 0 0  | 0 0   | 0 0 | 0 0   | 20 20 | 13.22 |
| IPR003781      | 20 | 2019 19 13  | 2 0  | 6 1   | 3 0 | 1 0   | 3 0   | 20.36 |
| IPR003864      | 20 | 324 0 0     | 0 0  | 14 14 | 0 0 | 5 5   | 1 1   | 19.12 |
| IPR004000      | 20 | 1215 1 1    | 0 0  | 4 4   | 0 0 | 5 5   | 6 6   | 21.14 |
| IPR004043      | 20 | 117 2 2     | 0 0  | 0 0   | 6 5 | 2 2   | 8 7   | 27.13 |
| IPR004044      | 20 | 942 11 7    | 6 4  | 5 2   | 1 0 | 3 2   | 2 0   | 31.84 |
| IPR004143      | 20 | 2144 13 10  | 6 3  | 3 1   | 1 0 | 4 2   | 1 0   | 13.57 |
| IPR004154      | 20 | 3291 5 5    | 0 0  | 6 2   | 1 1 | 5 0   | 11 6  | 14.25 |
| IPR004837      | 20 | 2329 1 1    | 0 0  | 6 4   | 5 0 | 2 1   | 9 6   | 12.74 |
| IPR004869      | 20 | 2006 21 20  | 0 0  | 0 0   | 0 0 | 0 0   | 1 0   | 8.42  |
| IPR005075      | 20 | 832 20 20   | 0 0  | 0 0   | 0 0 | 0 0   | 0 0   | 13.8  |
| IPR005151      | 20 | 1314 20 17  | 1 0  | 3 0   | 0 0 | 1 1   | 1 1   | 23.59 |
| IPR005543      | 20 | 1662 20 20  | 1 1  | 0 0   | 0 0 | 0 0   | 0 0   | 16.43 |
| IPR005804      | 20 | 1672 12 9   | 0 0  | 4 1   | 2 0 | 7 4   | 0 0   | 6.94  |
| IPR006037      | 20 | 2625 19 13  | 6 1  | 1 0   | 0 0 | 0 0   | 0 0   | 10.33 |
| IPR006176      | 20 | 1810 8 6    | 3 1  | 8 6   | 2 0 | 3 2   | 5 3   | 27.98 |
| IPR006558      | 20 | 26 15 13    | 0 0  | 0 0   | 0 0 | 0 0   | 7 5   | 16.1  |
| IPR007055      | 20 | 1548 19 18  | 0 0  | 1 0   | 0 0 | 0 0   | 2 1   | 14.34 |
| IPR007890      | 20 | 295 20 20   | 0 0  | 0 0   | 0 0 | 0 0   | 0 0   | 14.55 |
| IPR007891      | 20 | 361 20 17   | 3 0  | 0 0   | 0 0 | 0 0   | 0 0   | 12.66 |
| IPR008279      | 20 | 2028 19 14  | 5 0  | 2 0   | 2 0 | 3 1   | 1 0   | 28.64 |
| IPR011063      | 20 | 1401 12 10  | 2 0  | 4 4   | 2 1 | 1 1   | 2 2   | 21.31 |
| IPR011096      | 20 | 298 19 18   | 0 0  | 0 0   | 0 0 | 2 1   | 0 0   | 15.76 |
| IPR011102      | 20 | 361 20 18   | 0 0  | 2 0   | 0 0 | 0 0   | 0 0   | 27.67 |
| IPR011124      | 20 | 162 0 0     | 0 0  | 16 13 | 1 0 | 0 0   | 6 4   | 34.55 |
| IPR011260      | 20 | 837 18 17   | 0 0  | 0 0   | 0 0 | 0 0   | 0 0   | 37.29 |
| IPR011547      | 20 | 1615 5 3    | 1 0  | 6 5   | 1 0 | 3 1   | 10 9  | 20    |
| IPR011706      | 20 | 1563 11 8   | 2 0  | 12 9  | 1 0 | 2 0   | 3 1   | 20.35 |
| IPR011716      | 20 | 187 16 11   | 4 1  | 4 2   | 0 0 | 2 1   | 1 0   | 17.87 |
| IPR015883      | 20 | 607 16 12   | 3 2  | 2 0   | 0 0 | 2 1   | 6 2   | 22.48 |
| IPR019565      | 20 | 252 10 5    | 6 1  | 0 0   | 0 0 | 0 0   | 13 8  | 41.95 |
| IPR020616      | 20 | 3074 4 3    | 1 0  | 6 5   | 1 0 | 3 2   | 6 5   | 28.19 |
| PF10342        | 20 | 122 16 16   | 2 2  | 0 0   | 0 0 | 1 1   | 0 0   | 11.26 |
| IPR000095      | 21 | 478 0 0     | 0 0  | 4 4   | 0 0 | 5 0   | 17 12 | 31.8  |
| IPR000297      | 21 | 2036 12 11  | 0 0  | 6 4   | 1 0 | 1 0   | 4 3   | 23.22 |
| IPR000342      | 21 | 697 0 0     | 0 0  | 0 0   | 0 0 | 5 1   | 21 17 | 14.5  |
| IPR000531      | 21 | 6938 19 17  | 2 0  | 0 0   | 0 0 | 0 0   | 2 2   | 7.45  |
| IPR000535      | 21 | 457 6 6     | 0 0  | 11 11 | 0 0 | 0 0   | 4 4   | 15.0  |
| IPR000743      | 21 | 799 11 10   | 0 0  | 9 9   | 0 0 | 2 1   | 0 0   | 19.08 |
| IPR000834      | 21 | 1232 13 13  | 0 0  | 0 0   | 0 0 | 1 0   | 7 6   | 14.01 |
| IPR001002      | 21 | 249 0 0     | 0 0  | 2 2   | 0 0 | 16 13 | 4 1   | 50.2  |
| IPR001451      | 21 | 2556 17 12  | 3 0  | 5 1   | 1 0 | 7 2   | 2 0   | 29.63 |
| IPR001494      | 21 | 742 0 0     | 0 0  | 14 4  | 0 0 | 3 0   | 17 6  | 12.55 |
| IPR001853      | 21 | 1761 11 10  | 1 0  | 8 8   | 0 0 | 1 1   | 1 1   | 7.80  |
| IPR002711      | 21 | 362 21 19   | 0 0  | 2 0   | 2 0 | 0 0   | 3 1   | 16.46 |
| IPR002818      | 21 | 3106 11 8   | 3 1  | 7 6   | 0 0 | 5 3   | 0 0   | 13.31 |
| IPR003601      | 21 | 1403 15 7   | 6 0  | 11 4  | 4 0 | 4 0   | 8 1   | 33.12 |
| IPR004014      | 21 | 1788 8 4    | 5 1  | 8 4   | 4 0 | 6 1   | 8 3   | 17.8  |
| IPR004129      | 21 | 1727 10 10  | 1 1  | 4 4   | 0 0 | 3 3   | 3 3   | 14.82 |
| IPR004170      | 21 | 123 1 1     | 0 0  | 2 1   | 3 3 | 0 0   | 16 15 | 16.93 |
| IPR004176      | 21 | 3226 9 4    | 2 0  | 17 12 | 2 0 | 3 0   | 0 0   | 16.11 |
| IPR004273      | 21 | 375 0 0     | 0 0  | 9 5   | 5 1 | 5 1   | 10 6  | 24.22 |
| IPR004853      | 21 | 737 1 0     | 0 0  | 16 14 | 1 0 | 3 1   | 6 5   | 11.36 |
| IPR005113      | 21 | 275 2 2     | 0 0  | 6 2   | 0 0 | 5 3   | 13 9  | 16.73 |
| IPR005181      | 21 | 253 18 17   | 3 2  | 0 0   | 0 0 | 0 0   | 0 0   | 20.66 |
| IPR006143      | 21 | 6117 22 20  | 0 0  | 3 1   | 0 0 | 0 0   | 1 1   | 12.84 |
| IPR007421      | 21 | 399 16 14   | 2 0  | 0 0   | 0 0 | 0 0   | 5 5   | 10.97 |
| IPR007630      | 21 | 3212 18 15  | 2 2  | 4 1   | 0 0 | 0 0   | 0 0   | 28.19 |
| IPR007892      | 21 | 153 19 11   | 10 2 | 0 0   | 0 0 | 0 0   | 0 0   | 7.42  |
| IPR010488      | 21 | 421 9 9     | 0 0  | 1 1   | 0 0 | 4 3   | 8 7   | 9.15  |
| IPR011129      | 21 | 3767 15 12  | 0 0  | 0 0   | 0 0 | 5 1   | 0 0   | 35.21 |
| IPR011707      | 21 | 1664 9 6    | 3 0  | 12 10 | 1 0 | 2 0   | 4 2   | 25.29 |
| IPR012640      | 21 | 131 20 19   | 0 0  | 2 1   | 0 0 | 0 0   | 0 0   | 33.85 |
| IPR014045      | 21 | 69 1 1      | 0 0  | 17 16 | 0 0 | 0 0   | 1 0   | 7.02  |
| PTHR23258      | 21 | 213 3 3     | 0 0  | 18 18 | 0 0 | 0 0   | 0 0   | 3.57  |
| IPR000716      | 22 | 407 0 0     | 0 0  | 0 0   | 0 0 | 0 0   | 22 22 | 23.18 |
| IPR001229      | 22 | 401 2 1     | 0 0  | 19 19 | 0 0 | 2 0   | 1 0   | 24.74 |
| IPR001310      | 22 | 1642 11 10  | 1 0  | 1 1   | 0 0 | 7 6   | 4 3   | 21.5  |
| IPR001599      | 22 | 426 12 7    | 5 0  | 1 1   | 0 0 | 0 0   | 13 8  | 17    |
| IPR001915      | 22 | 2245 18 16  | 1 1  | 0 0   | 0 0 | 0 0   | 5 3   | 16.41 |
| IPR002553      | 22 | 851 2 1     | 3 2  | 7 2   | 5 0 | 12 7  | 8 3   | 10.63 |
| IPR002625      | 22 | 1007 5 3    | 0 0  | 12 9  | 0 0 | 4 2   | 3 2   | 18.88 |
| IPR004017      | 22 | 2866 20 14  | 6 1  | 2 1   | 0 0 | 0 0   | 0 0   | 16.66 |
| IPR005645      | 22 | 267 5 4     | 0 0  | 9 6   | 3 1 | 5 5   | 0 0   | 15.24 |
| IPR006145      | 22 | 4223 5 4    | 0 0  | 10 9  | 2 1 | 2 1   | 7 6   | 26.91 |
| IPR006212</    |    |             |      |       |     |       |       |       |

|           |    |            |       |       |      |       |       |       |
|-----------|----|------------|-------|-------|------|-------|-------|-------|
| IPR009081 | 22 | 155 18 4   | 0 0   | 6 1   | 0 0  | 15 2  | 6 0   | 8.11  |
| IPR013163 | 22 | 651 21 21  | 1 1   | 0 0   | 0 0  | 0 0   | 0 0   | 16.86 |
| IPR013498 | 22 | 1679 17 11 | 5 1   | 7 2   | 4 0  | 0 0   | 7 1   | 36.91 |
| PF06283   | 22 | 217 21 20  | 2 1   | 0 0   | 0 0  | 2 0   | 0 0   | 15.22 |
| PTH02904  | 22 | 167 6 6    | 1 0   | 8 5   | 1 0  | 4 3   | 6 5   | 8.33  |
| TIGR01965 | 22 | 588 23 23  | 0 0   | 0 0   | 0 0  | 0 0   | 0 0   | 31.1  |
| IPR000001 | 23 | 422 0 0    | 0 0   | 2 2   | 2 2  | 0 0   | 20 20 | 37.5  |
| IPR000858 | 23 | 764 0 0    | 0 0   | 25 25 | 0 0  | 0 0   | 0 0   | 23.49 |
| IPR000938 | 23 | 447 0 0    | 0 0   | 1 0   | 3 2  | 11 8  | 13 11 | 36.36 |
| IPR001298 | 23 | 1626 0 0   | 0 0   | 10 9  | 0 0  | 0 0   | 12 11 | 17.47 |
| IPR001374 | 23 | 568 4 4    | 0 0   | 7 2   | 4 0  | 5 3   | 15 9  | 19.54 |
| IPR002018 | 23 | 1747 4 4   | 0 0   | 1 0   | 0 0  | 8 7   | 11 11 | 18.21 |
| IPR002314 | 23 | 4483 7 1   | 7 2   | 11 4  | 6 0  | 11 4  | 12 6  | 12.27 |
| IPR003124 | 23 | 419 2 2    | 0 0   | 1 1   | 0 0  | 6 4   | 19 17 | 40.12 |
| IPR003129 | 23 | 189 0 0    | 0 0   | 0 0   | 0 0  | 0 0   | 0 0   | 12.67 |
| IPR003604 | 23 | 628 0 0    | 0 0   | 10 6  | 0 0  | 4 1   | 17 13 | 23.91 |
| IPR003615 | 23 | 1320 20 17 | 3 2   | 2 0   | 0 0  | 0 0   | 3 1   | 23.15 |
| IPR004330 | 23 | 458 0 0    | 0 0   | 23 21 | 0 0  | 3 1   | 2 0   | 23.06 |
| IPR006092 | 23 | 6409 15 9  | 2 0   | 8 2   | 2 0  | 7 3   | 4 1   | 12.7  |
| IPR006222 | 23 | 1601 16 12 | 2 0   | 2 0   | 1 0  | 4 2   | 6 3   | 15.11 |
| IPR006594 | 23 | 532 0 0    | 0 0   | 12 5  | 5 2  | 9 1   | 12 4  | 17.6  |
| IPR006670 | 23 | 1889 0 0   | 3 1   | 13 8  | 5 0  | 8 4   | 9 5   | 10.13 |
| IPR006860 | 23 | 1083 23 23 | 0 0   | 0 0   | 0 0  | 0 0   | 0 0   | 20.49 |
| IPR007895 | 23 | 382 23 22  | 0 0   | 1 0   | 0 0  | 0 0   | 0 0   | 6.57  |
| IPR008756 | 23 | 284 23 22  | 0 0   | 1 0   | 0 0  | 0 0   | 0 0   | 11.51 |
| IPR010559 | 23 | 1120 20 18 | 0 0   | 1 0   | 0 0  | 0 0   | 1 0   | 31.19 |
| IPR011708 | 23 | 1232 14 11 | 0 0   | 12 9  | 0 0  | 0 0   | 0 0   | 34.1  |
| IPR012310 | 23 | 912 7 4    | 2 0   | 10 6  | 2 0  | 11 8  | 5 2   | 20.85 |
| IPR013099 | 23 | 1780 6 2   | 4 1   | 3 2   | 1 0  | 0 0   | 15 13 | 18.94 |
| IPR013155 | 23 | 3357 8 2   | 3 0   | 9 3   | 3 0  | 10 6  | 13 6  | 14.03 |
| IPR013520 | 23 | 531 13 13  | 2 2   | 1 1   | 1 1  | 6 6   | 0 0   | 8.18  |
| IPR00793  | 24 | 2289 4 0   | 4 0   | 16 13 | 3 0  | 9 6   | 4 1   | 22.27 |
| IPR000801 | 24 | 1469 23 22 | 1 0   | 1 1   | 0 0  | 1 1   | 0 0   | 9.48  |
| IPR000850 | 24 | 1412 2 2   | 0 0   | 11 11 | 1 1  | 1 1   | 10 10 | 33.23 |
| IPR000922 | 24 | 304 1 1    | 0 0   | 3 3   | 1 0  | 0 0   | 20 19 | 26.97 |
| IPR001315 | 24 | 282 0 0    | 0 0   | 0 0   | 0 0  | 0 0   | 24 24 | 10.81 |
| IPR001606 | 24 | 352 0 0    | 0 0   | 11 5  | 0 0  | 10 4  | 17 10 | 19.25 |
| IPR002017 | 24 | 419 1 1    | 0 0   | 0 0   | 0 0  | 0 0   | 22 22 | 6.83  |
| IPR002218 | 24 | 1152 19 14 | 5 1   | 5 3   | 0 0  | 1 1   | 0 0   | 34.24 |
| IPR002478 | 24 | 1218 7 4   | 11 6  | 9 3   | 4 0  | 4 1   | 9 5   | 16.69 |
| IPR002610 | 24 | 1538 10 10 | 1 1   | 8 7   | 0 0  | 1 1   | 6 5   | 19.2  |
| IPR002925 | 24 | 1494 18 16 | 1 0   | 2 2   | 0 0  | 4 3   | 2 2   | 9.68  |
| IPR003148 | 24 | 2722 15 10 | 7 3   | 5 4   | 0 0  | 0 0   | 3 1   | 14.08 |
| IPR003596 | 24 | 820 0 0    | 0 0   | 0 0   | 0 0  | 0 0   | 24 24 | 28.15 |
| IPR003659 | 24 | 401 0 0    | 0 0   | 0 0   | 0 0  | 0 0   | 23 23 | 30.18 |
| IPR004099 | 24 | 3114 12 8  | 2 0   | 13 11 | 1 0  | 2 0   | 2 1   | 21.39 |
| IPR005117 | 24 | 1988 13 9  | 5 4   | 5 4   | 0 0  | 7 3   | 0 0   | 13.58 |
| IPR006189 | 24 | 329 20 17  | 0 0   | 7 4   | 0 0  | 0 0   | 0 0   | 11.11 |
| IPR006207 | 24 | 177 0 0    | 0 0   | 0 0   | 0 0  | 0 0   | 24 24 | 25.97 |
| IPR008197 | 24 | 268 0 0    | 0 0   | 0 0   | 0 0  | 0 0   | 24 24 | 38.99 |
| IPR011460 | 24 | 178 25 25  | 0 0   | 0 0   | 0 0  | 0 0   | 0 0   | 26.69 |
| IPR011576 | 24 | 2345 17 13 | 1 1   | 5 2   | 0 0  | 7 4   | 1 0   | 7.55  |
| IPR013211 | 24 | 117 23 23  | 1 1   | 0 0   | 0 0  | 0 0   | 0 0   | 31.23 |
| IPR017867 | 24 | 1531 16 15 | 0 0   | 6 5   | 0 0  | 3 3   | 0 0   | 22.28 |
| PF07567   | 24 | 179 0 0    | 0 0   | 24 24 | 0 0  | 0 0   | 0 0   | 34.77 |
| PTH018958 | 24 | 489 8 3    | 0 0   | 10 5  | 1 0  | 10 5  | 6 2   | 9.43  |
| IPR000555 | 25 | 903 1 1    | 0 0   | 17 8  | 7 0  | 8 1   | 15 6  | 11.44 |
| IPR000623 | 25 | 1424 16 13 | 2 0   | 2 2   | 1 0  | 9 5   | 1 1   | 20.61 |
| IPR000719 | 25 | 234 5 5    | 1 1   | 8 8   | 4 4  | 2 2   | 2 2   | 1.49  |
| IPR001327 | 25 | 71 23 17   | 1 0   | 3 1   | 0 0  | 4 0   | 1 0   | 14.72 |
| IPR001353 | 25 | 2372 1 1   | 1 0   | 9 8   | 2 0  | 6 4   | 10 8  | 14.55 |
| IPR002016 | 25 | 1806 0 0   | 0 0   | 21 21 | 0 0  | 1 4   | 0 0   | 23.78 |
| IPR002121 | 25 | 1125 16 11 | 4 1   | 11 5  | 4 0  | 5 0   | 7 2   | 19.63 |
| IPR002372 | 25 | 1420 14 11 | 7 5   | 4 1   | 0 0  | 2 0   | 4 1   | 15.12 |
| IPR002376 | 25 | 2514 18 14 | 3 0   | 1 0   | 1 0  | 4 2   | 8 6   | 21.7  |
| IPR002933 | 25 | 5106 7 5   | 1 0   | 3 3   | 0 0  | 13 13 | 2 1   | 10.76 |
| IPR003367 | 25 | 1167 16 15 | 0 0   | 0 0   | 0 0  | 0 0   | 11 10 | 51.82 |
| IPR003409 | 25 | 3022 5 5   | 0 0   | 4 4   | 9 8  | 3 3   | 7 6   | 25.81 |
| IPR004182 | 25 | 562 0 0    | 0 0   | 3 2   | 0 0  | 6 3   | 20 16 | 17.51 |
| IPR005481 | 25 | 3820 16 2  | 7 1   | 12 1  | 8 0  | 17 2  | 17 4  | 31.12 |
| IPR006102 | 25 | 789 22 17  | 4 0   | 5 2   | 0 0  | 8 3   | 3 0   | 9.53  |
| IPR006103 | 25 | 792 23 20  | 3 0   | 5 2   | 0 0  | 3 0   | 2 0   | 17.12 |
| IPR006175 | 25 | 2578 13 12 | 0 0   | 1 0   | 1 2  | 1 9   | 0 0   | 19.05 |
| IPR006575 | 25 | 465 0 0    | 0 0   | 15 3  | 12 3 | 14 2  | 15 2  | 13.61 |
| IPR006649 | 25 | 1235 0 0   | 0 0   | 13 13 | 0 0  | 7 7   | 5 5   | 23.13 |
| IPR007419 | 25 | 1459 23 18 | 2 0   | 1 0   | 0 0  | 4 0   | 0 0   | 25.92 |
| IPR013130 | 25 | 974 9 4    | 0 0   | 7 2   | 1 0  | 12 9  | 7 3   | 10.74 |
| IPR013684 | 25 | 311 3 2    | 2 1   | 4 2   | 3 2  | 8 4   | 14 10 | 13.33 |
| IPR016048 | 25 | 3399 23 23 | 0 0   | 0 0   | 0 0  | 0 0   | 0 0   | 7.71  |
| IPR019748 | 25 | 64 0 0     | 0 0   | 0 0   | 0 0  | 0 0   | 22 22 | 12.3  |
| PF09084   | 25 | 2273 24 24 | 0 0   | 1 1   | 0 0  | 0 0   | 0 0   | 4.75  |
| PTH010499 | 25 | 159 18 17  | 0 0   | 1 1   | 0 0  | 2 1   | 6 5   | 8.64  |
| IPR000033 | 26 | 2574 1 1   | 0 0   | 3 3   | 0 0  | 2 2   | 16 16 | 24.11 |
| IPR000651 | 26 | 509 0 0    | 0 0   | 0 0   | 1 0  | 9 7   | 17 15 | 11.13 |
| IPR000780 | 26 | 1041 16 17 | 5 1   | 0 0   | 0 0  | 0 0   | 0 0   | 24.22 |
| IPR000917 | 26 | 2748 24 23 | 0 0   | 1 0   | 0 0  | 2 0   | 2 1   | 11.4  |
| IPR000994 | 26 | 3709 11 9  | 1 0   | 8 3   | 5 0  | 6 1   | 11 6  | 17.82 |
| IPR01064  | 26 | 534 25 23  | 0 0   | 1 0   | 0 0  | 1 1   | 1 0   | 23.01 |
| IPR001471 | 26 | 1583 3 3   | 0 0   | 23 23 | 0 0  | 0 0   | 1 1   | 37.74 |
| IPR001739 | 26 | 325 0 0    | 0 0   | 13 10 | 0 0  | 0 0   | 19 16 | 14.19 |
| IPR001956 | 26 | 95 16 24   | 2 0   | 0 0   | 0 0  | 0 0   | 0 0   | 25.82 |
| IPR002125 | 26 | 3059 14 12 | 3 2   | 5 3   | 0 0  | 8 8   | 0 0   | 24.96 |
| IPR002539 | 26 | 1708 18 11 | 0 0   | 4 4   | 0 0  | 7 1   | 3 1   | 12.54 |
| IPR002883 | 26 | 54 26 26   | 0 0   | 0 0   | 0 0  | 0 0   | 0 0   | 65.6  |
| IPR003582 | 26 | 465 0 0    | 0 0   | 2 2   | 0 0  | 0 0   | 26 26 | 31.03 |
| IPR003657 | 26 | 829 0 0    | 0 0   | 27 27 | 1 1  | 0 0   | 0 0   | 47.91 |
| IPR004108 | 26 | 407 21 20  | 0 0   | 3 2   | 0 0  | 0 0   | 1 0   | 26.69 |
| IPR006067 | 26 | 1788 15 11 | 5 4   | 5 4   | 0 0  | 7 3   | 0 0   | 13.21 |
| IPR006091 | 26 | 6298 18 12 | 2 0   | 9 2   | 2 0  | 7 3   | 6 2   | 31.59 |
| IPR006578 | 26 | 1061 0 0   | 0 0   | 4 4   | 0 0  | 0 0   | 21 21 | 11.5  |
| IPR006600 | 26 | 457 0 0    | 0 0   | 0 0   | 0 0  | 20 17 | 11 8  | 15.12 |
| IPR006657 | 26 | 3209 22 15 | 11 4  | 0 0   | 0 0  | 12 0  | 0 0   | 12.46 |
| IPR006683 | 26 | 4562 15 14 | 0 0   | 5 4   | 0 0  | 6 6   | 1 1   | 8.57  |
| IPR007921 | 26 | 542 26 25  | 0 0   | 0 0   | 1 0  | 0 0   | 0 0   | 14.08 |
| IPR011110 | 26 | 802 26 26  | 0 0   | 0 0   | 0 0  | 0 0   | 0 0   | 35.63 |
| IPR012307 | 26 | 2752 19 18 | 3 2   | 1 1   | 0 0  | 4 4   | 0 0   | 4.59  |
| IPR014853 | 26 | 285 0 0    | 0 0   | 0 0   | 0 0  | 0 0   | 25 25 | 28.13 |
| IPR018159 | 26 | 3695 0 0   | 0 0   | 0 0   | 0 0  | 0 0   | 25 25 | 10.91 |
| TIGR02276 | 26 | 240 23 20  | 7 4   | 0 0   | 0 0  | 0 0   | 0 0   | 3.3   |
| IPR000070 | 27 | 607 13 11  | 0 0   | 14 13 | 0 0  | 2 1   | 0 0   | 32.61 |
| IPR000172 | 27 | 1940 20 14 | 2 0   | 2 1   | 1 0  | 10 5  | 2 1   | 22.19 |
| IPR000620 | 27 | 13270 7 5  | 0 0   | 21 19 | 1 0  | 4 1   | 1 0   | 3.76  |
| IPR000836 | 27 | 7248 18 16 | 3 2   | 5 3   | 1 0  | 4 3   | 3 1   | 13.31 |
| IPR001879 | 27 | 369 0 0    | 0 0   | 0 0   | 0 0  | 0 0   | 25 25 | 24.8  |
| IPR002502 | 27 | 1000 27 26 | 0 0   | 0 0   | 0 0  | 1 0   | 1 1   | 16.99 |
| IPR002562 | 27 | 1598 10 6  | 0 0   | 15 11 | 5 2  | 2 0   | 7 2   | 12.64 |
| IPR002901 | 27 | 569 27 27  | 0 0   | 0 0   | 0 0  | 0 0   | 0 0   | 16.68 |
| IPR003097 | 27 | 680 13 9   | 0 0   | 6 3   | 2 0  | 10 7  | 4 1   | 17.96 |
| IPR004820 | 27 | 2646 15 11 | 2 1   | 5 5   | 1 1  | 6 4   | 4 2   | 16.42 |
| IPR006171 | 27 | 190 24 19  | 2 0   | 5 1   | 0 0  | 2 0   | 6 1   | 10.1  |
| IPR006656 | 27 | 3949 26 18 | 7 0   | 4 0   | 0 0  | 5 0   | 4 1   | 11.87 |
| IPR007560 | 27 | 457 22 20  | 5 3   | 0 0   | 0 0  | 2 2   | 0 0   | 15.66 |
| IPR007742 | 27 | 169 3 1    | 27 25 | 0 0   | 0 0  | 0 0   | 0 0   | 29.72 |
| IPR008334 | 27 | 1183 27 25 | 1 0   | 2 0   | 0 0  | 1 0   | 1 0   | 16.22 |
| IPR010285 | 27 | 401 8 6    | 0 0   | 12 9  | 1 0  | 4 2   | 10 8  | 12.25 |
| IPR010730 | 27 | 430 0 0    | 0 0   | 0 0   | 0 0  | 25 25 | 0 0   | 22.72 |
| IPR011705 | 27 | 958 0 0    | 0 0   | 7 4   | 0 0  | 0 0   | 21 18 | 13.83 |
| IPR017986 | 27 | 117 6 3    | 0 0   | 6 4   | 6 3  | 9 3   | 12 7  | 10.04 |
| IPR019587 | 27 | 1265 19 19 | 0 0   | 8 8   | 0 0  | 0 0   | 0 0   | 4.85  |
| PF10282   | 27 | 627 23 19  | 10 6  | 0 0   | 0 0  | 0 0   | 0 0   | 13.06 |
| PTH023155 | 27 | 878 7 7    | 0 0   | 13 13 | 0 0  | 1 1   | 4 4   | 21.68 |
| TIGR01167 | 27 | 55 27 27   | 0 0   | 0 0   | 0 0  | 0 0   | 0 0   | 19.97 |
| TIGR01444 | 27 | 439 26 25  | 1 1   | 2 1   | 0 0  | 0 0   | 0 0   | 16.42 |
| IPR000488 | 28 | 476 0 0    | 0 0   | 0 0   | 0 0  | 0 0   | 31 31 | 9.58  |
| IPR000868 | 28 | 2461 9 8   | 1 0   | 7 7   | 0 0  | 9 9   | 2 2   | 14.27 |
| IPR001000 | 28 | 341 28 25  | 3 1   | 1 0   | 0 0  | 1 1   | 0 0   | 25.13 |
| IPR001482 | 28 | 2786 14 11 | 7 7   | 0 0   | 0 0  | 1 1   | 0 0   | 24.66 |
| IPR001736 | 28 | 3042 24 21 | 1 0   | 9 6   | 1 0  | 3 0   | 4 1   | 28.37 |
| IPR001943 | 28 | 2108 21 9  | 8 0   | 10 6  | 0 0  | 0 0   | 0 0   | 32.01 |
| IPR002213 | 28 | 2503 2 1   | 0 0   | 18 17 |      |       |       |       |

|           |    |             |       |       |      |       |       |       |
|-----------|----|-------------|-------|-------|------|-------|-------|-------|
| IPR012317 | 28 | 300 1 0     | 0 0   | 11 4  | 3 1  | 6 2   | 16 10 | 14.98 |
| IPR019554 | 28 | 2344 25 21  | 4 0   | 2 0   | 2 0  | 2 0   | 3 1   | 18.9  |
| PD968187  | 28 | 542 12 9    | 0 0   | 1 0   | 2 1  | 14 13 | 0 0   | 1.62  |
| TIGR00229 | 28 | 44 27 20    | 8 1   | 1 0   | 0 0  | 0 0   | 0 0   | 5.96  |
| IPR000005 | 29 | 835 26 25   | 0 0   | 0 0   | 0 0  | 1 0   | 0 0   | 21.04 |
| IPR000340 | 29 | 776 7 7     | 1 1   | 7 4   | 2 0  | 7 6   | 9 5   | 13.47 |
| IPR002078 | 29 | 492 26 25   | 2 2   | 2 1   | 0 0  | 0 0   | 0 0   | 16.56 |
| IPR002508 | 29 | 1222 29 29  | 0 0   | 0 0   | 0 0  | 0 0   | 0 0   | 23.17 |
| IPR002589 | 29 | 711 11 11   | 0 0   | 4 3   | 1 0  | 4 4   | 11 0  | 22.96 |
| IPR002591 | 29 | 877 16 15   | 1 0   | 2 1   | 0 0  | 6 5   | 4 3   | 9.11  |
| IPR002884 | 29 | 323 22 21   | 0 0   | 0 0   | 0 0  | 5 4   | 4 3   | 22.48 |
| IPR003010 | 29 | 3186 15 13  | 2 1   | 2 1   | 0 0  | 11 9  | 4 3   | 17.29 |
| IPR003115 | 29 | 1848 26 23  | 2 1   | 4 2   | 0 0  | 0 0   | 0 0   | 22.01 |
| IPR003265 | 29 | 2544 12 9   | 3 1   | 12 10 | 1 0  | 7 5   | 4 1   | 17.09 |
| IPR003323 | 29 | 435 5 4     | 0 0   | 0 0   | 0 0  | 1 1   | 16 14 | 18.86 |
| IPR004101 | 29 | 3765 25 20  | 2 1   | 5 3   | 0 0  | 5 0   | 1 0   | 16.72 |
| IPR005102 | 29 | 47 28 27    | 0 0   | 0 0   | 0 0  | 2 1   | 0 0   | 21.77 |
| IPR006068 | 29 | 1601 7 4    | 3 0   | 9 5   | 3 0  | 14 11 | 6 2   | 15    |
| IPR006141 | 29 | 67 20 17    | 8 5   | 0 0   | 0 0  | 0 0   | 4 4   | 20.67 |
| IPR006153 | 29 | 3450 16 10  | 3 0   | 14 9  | 0 0  | 4 4   | 5 3   | 9.94  |
| IPR006158 | 29 | 1932 30 24  | 4 0   | 4 0   | 0 0  | 0 0   | 5 0   | 11.73 |
| IPR006555 | 29 | 981 11 6    | 8 2   | 17 11 | 4 0  | 4 0   | 5 0   | 19.76 |
| IPR007889 | 29 | 581 6 5     | 1 0   | 0 0   | 0 0  | 18 16 | 8 6   | 23.53 |
| IPR011510 | 29 | 185 0 0     | 0 0   | 2 2   | 0 0  | 5 4   | 22 21 | 11.75 |
| IPR015706 | 29 | 80 0 0      | 0 0   | 31 30 | 0 0  | 1 0   | 1 0   | 5.18  |
| IPR018771 | 29 | 166 29 17   | 12 0  | 0 0   | 0 0  | 0 0   | 0 0   | 14.49 |
| IPR003772 | 30 | 530 0 0     | 0 0   | 0 0   | 0 0  | 0 0   | 30 30 | 35.95 |
| IPR000782 | 30 | 1151 6 5    | 0 0   | 14 13 | 0 0  | 4 3   | 9 9   | 20.81 |
| IPR001164 | 30 | 704 0 0     | 0 0   | 8 5   | 0 0  | 4 3   | 15 12 | 32.23 |
| IPR001206 | 30 | 1299 6 5    | 0 0   | 6 4   | 3 1  | 3 3   | 18 16 | 19.16 |
| IPR002007 | 30 | 483 4 3     | 0 0   | 0 0   | 0 0  | 4 3   | 21 21 | 16.49 |
| IPR002641 | 30 | 2268 15 12  | 0 0   | 10 6  | 14 9 | 3 0   | 0 0   | 17.51 |
| IPR003137 | 30 | 785 15 12   | 1 0   | 16 10 | 0 0  | 5 1   | 8 2   | 13.36 |
| IPR008145 | 30 | 1417 5 5    | 0 0   | 3 3   | 0 0  | 0 0   | 25 25 | 28.02 |
| IPR011511 | 30 | 208 1 0     | 0 0   | 0 0   | 0 0  | 3 2   | 28 27 | 13.45 |
| IPR014044 | 30 | 618 27 27   | 1 1   | 0 0   | 0 0  | 1 0   | 2 1   | 17.29 |
| IPR017447 | 30 | 565 1 1     | 0 0   | 11 7  | 4 0  | 6 3   | 20 13 | 13.57 |
| IPR019955 | 30 | 135 3 3     | 0 0   | 13 10 | 0 0  | 2 2   | 13 10 | 18.86 |
| IPR001220 | 31 | 532 10 10   | 1 1   | 21 21 | 0 0  | 0 0   | 0 0   | 25.68 |
| IPR001251 | 31 | 1341 0 0    | 0 0   | 7 4   | 4 1  | 3 1   | 23 19 | 10.19 |
| IPR001525 | 31 | 1328 12 12  | 0 0   | 12 7  | 1 1  | 8 3   | 6 4   | 13.87 |
| IPR001761 | 31 | 6042 31 31  | 0 0   | 0 0   | 0 0  | 0 0   | 0 0   | 14.08 |
| IPR004027 | 31 | 1377 25 21  | 1 0   | 8 4   | 1 1  | 2 0   | 0 0   | 57.24 |
| IPR004827 | 31 | 1663 0 0    | 0 0   | 13 12 | 0 0  | 10 9  | 9 9   | 21.99 |
| IPR005835 | 31 | 4814 25 17  | 8 2   | 5 2   | 0 0  | 4 1   | 4 1   | 14.79 |
| IPR007484 | 31 | 1275 27 24  | 1 0   | 3 1   | 0 0  | 5 2   | 4 2   | 15.97 |
| IPR007867 | 31 | 2021 20 14  | 2 0   | 3 1   | 1 0  | 13 8  | 2 1   | 20.6  |
| IPR010666 | 31 | 291 3 0     | 0 0   | 21 12 | 4 0  | 4 0   | 19 10 | 30.97 |
| IPR011081 | 31 | 150 30 29   | 2 1   | 0 0   | 0 0  | 0 0   | 0 0   | 22.46 |
| IPR011641 | 31 | 322 0 0     | 0 0   | 2 0   | 3 3  | 0 0   | 27 27 | 24.14 |
| IPR013106 | 31 | 725 0 0     | 0 0   | 0 0   | 0 0  | 0 0   | 33 33 | 4.97  |
| IPR014778 | 31 | 659 0 0     | 0 0   | 24 21 | 0 0  | 6 4   | 4 1   | 23.35 |
| IPR015590 | 31 | 8516 13 10  | 0 0   | 5 2   | 0 0  | 7 7   | 9 8   | 20.61 |
| IPR017877 | 31 | 500 1 0     | 0 0   | 24 19 | 1 0  | 3 1   | 8 3   | 14.45 |
| IPR018391 | 31 | 1249 19 15  | 13 10 | 2 0   | 0 0  | 2 0   | 3 1   | 28.76 |
| IPR018905 | 31 | 160 28 26   | 5 3   | 0 0   | 0 0  | 0 0   | 0 0   | 13.41 |
| IPR020843 | 31 | 377 21 4    | 0 0   | 10 1  | 0 0  | 22 7  | 9 0   | 32.78 |
| IPR000192 | 32 | 4490 20 19  | 1 1   | 4 2   | 0 0  | 10 7  | 3 1   | 11.27 |
| IPR000254 | 32 | 195 0 0     | 0 0   | 1 1   | 0 0  | 32 32 | 0 0   | 53.95 |
| IPR001179 | 32 | 3180 9 5    | 0 0   | 22 15 | 3 0  | 1 1   | 9 5   | 24.2  |
| IPR001395 | 32 | 5647 11 6   | 3 0   | 13 11 | 0 0  | 7 6   | 2 2   | 22.57 |
| IPR001434 | 32 | 1396 32 29  | 4 1   | 0 0   | 0 0  | 0 0   | 0 0   | 19.22 |
| IPR002890 | 32 | 514 19 14   | 8 3   | 0 0   | 0 0  | 0 0   | 14 9  | 12.14 |
| IPR002934 | 32 | 1874 20 19  | 3 2   | 1 0   | 2 1  | 3 2   | 6 5   | 11.25 |
| IPR003141 | 32 | 2148 24 21  | 1 0   | 11 9  | 0 0  | 0 0   | 0 0   | 26.33 |
| IPR003656 | 32 | 465 0 0     | 0 0   | 29 27 | 0 0  | 2 1   | 7 5   | 21.76 |
| IPR008638 | 32 | 450 32 32   | 0 0   | 0 0   | 0 0  | 0 0   | 0 0   | 21.97 |
| IPR011704 | 32 | 1164 17 15  | 4 3   | 10 5  | 7 1  | 6 1   | 9 3   | 10.05 |
| IPR011766 | 32 | 4531 12 3   | 9 1   | 13 7  | 2 1  | 12 10 | 2 0   | 14.68 |
| IPR013151 | 32 | 411 1 1     | 0 0   | 0 0   | 0 0  | 0 0   | 33 33 | 11.25 |
| IPR013249 | 32 | 5187 34 33  | 0 0   | 1 0   | 0 0  | 0 0   | 0 0   | 17.9  |
| PF06452   | 32 | 128 32 32   | 0 0   | 0 0   | 0 0  | 0 0   | 0 0   | 12.9  |
| PF12171   | 32 | 462 0 0     | 0 0   | 3 2   | 0 0  | 13 8  | 18 13 | 31.46 |
| IPR000064 | 33 | 1795 33 33  | 1 1   | 0 0   | 0 0  | 0 0   | 0 0   | 28.93 |
| IPR000403 | 33 | 934 2 2     | 0 0   | 16 8  | 9 2  | 12 3  | 16 7  | 14.18 |
| IPR000415 | 33 | 3081 34 33  | 1 0   | 0 0   | 0 0  | 0 0   | 1 1   | 11.88 |
| IPR000835 | 33 | 6055 22 22  | 8 8   | 2 2   | 0 0  | 0 0   | 0 0   | 14.34 |
| IPR001401 | 33 | 1237 11 11  | 0 0   | 10 5  | 4 1  | 11 8  | 5 1   | 13.01 |
| IPR002104 | 33 | 6807 23 22  | 7 6   | 0 0   | 0 0  | 0 2   | 2 2   | 14.68 |
| IPR002586 | 33 | 5793 32 23  | 5 1   | 9 3   | 0 0  | 1 1   | 0 0   | 16.72 |
| IPR002859 | 33 | 105 14 12   | 0 0   | 0 0   | 0 0  | 0 0   | 16 14 | 7.64  |
| IPR004045 | 33 | 4822 10 7   | 0 0   | 18 12 | 3 0  | 7 4   | 7 2   | 19.12 |
| IPR004841 | 33 | 6346 11 10  | 1 0   | 6 6   | 0 0  | 13 12 | 5 4   | 9.5   |
| IPR006026 | 33 | 821 14 13   | 0 0   | 3 1   | 0 0  | 2 1   | 19 18 | 20.01 |
| IPR006121 | 33 | 3862 19 14  | 4 0   | 15 11 | 2 0  | 1 1   | 4 1   | 24.19 |
| IPR011449 | 33 | 595 32 32   | 0 0   | 1 1   | 0 0  | 0 0   | 0 0   | 40.98 |
| IPR011497 | 33 | 318 0 0     | 0 0   | 2 1   | 0 0  | 0 0   | 32 31 | 20.17 |
| IPR019749 | 33 | 819 0 0     | 0 0   | 4 1   | 0 0  | 0 0   | 31 28 | 11.15 |
| PTH919959 | 33 | 302 21 17   | 0 0   | 3 1   | 2 0  | 11 8  | 7 3   | 5.94  |
| IPR000120 | 34 | 2715 11 11  | 0 0   | 9 9   | 0 0  | 15 15 | 0 0   | 22.61 |
| IPR000305 | 34 | 1714 30 15  | 6 1   | 10 9  | 0 0  | 0 1   | 3 2   | 19.12 |
| IPR001480 | 34 | 998 7 7     | 0 0   | 28 28 | 0 0  | 1 1   | 0 0   | 30.08 |
| IPR002867 | 34 | 1070 0 0    | 0 0   | 10 2  | 0 0  | 11 7  | 21 12 | 26    |
| IPR003609 | 34 | 760 0 0     | 0 0   | 22 19 | 0 0  | 1 0   | 17 14 | 16.55 |
| IPR004360 | 34 | 6375 26 26  | 0 0   | 5 5   | 0 0  | 0 0   | 4 4   | 13.41 |
| IPR006589 | 34 | 1865 28 23  | 4 0   | 1 1   | 0 0  | 5 3   | 3 0   | 27.02 |
| IPR012910 | 34 | 7089 33 31  | 0 0   | 3 1   | 0 0  | 0 0   | 0 0   | 17.33 |
| IPR013968 | 34 | 273 26 7    | 0 0   | 17 5  | 0 0  | 17 2  | 11 0  | 15.53 |
| IPR020807 | 34 | 642 26 8    | 0 0   | 10 1  | 0 0  | 23 7  | 0 0   | 18.84 |
| IPR021133 | 34 | 314 13 11   | 2 0   | 9 2   | 2 0  | 11 3  | 12 2  | 12.64 |
| IPR000242 | 35 | 1105 4 4    | 0 0   | 0 0   | 1 0  | 3 3   | 31 30 | 24.77 |
| IPR000591 | 35 | 509 5 5     | 0 0   | 0 0   | 0 0  | 0 0   | 28 21 | 14.51 |
| IPR000683 | 35 | 3879 30 25  | 4 0   | 2 1   | 0 0  | 3 1   | 2 1   | 18.76 |
| IPR000727 | 35 | 1190 6 6    | 1 1   | 16 13 | 2 0  | 11 8  | 12 8  | 13.16 |
| IPR002083 | 35 | 987 0 0     | 0 0   | 20 16 | 0 0  | 5 2   | 23 18 | 10.62 |
| IPR002178 | 35 | 2002 33 33  | 0 0   | 2 2   | 0 0  | 0 0   | 1 1   | 15.65 |
| IPR003029 | 35 | 661 26 16   | 1 1   | 10 1  | 2 0  | 5 2   | 12 2  | 7.27  |
| IPR004161 | 35 | 7276 18 11  | 7 1   | 13 5  | 8 1  | 11 3  | 13 6  | 15.97 |
| IPR005532 | 35 | 1082 34 31  | 2 0   | 1 1   | 0 0  | 2 1   | 0 0   | 25.27 |
| IPR007021 | 35 | 317 0 0     | 0 0   | 35 34 | 0 0  | 1 0   | 0 0   | 31.03 |
| IPR007848 | 35 | 2585 22 20  | 2 1   | 4 3   | 0 0  | 7 7   | 2 2   | 16.54 |
| IPR010496 | 35 | 262 33 33   | 0 0   | 0 0   | 0 0  | 2 2   | 0 0   | 15.91 |
| IPR011611 | 35 | 4383 17 13  | 1 0   | 13 11 | 0 0  | 6 4   | 4 3   | 10    |
| IPR013126 | 35 | 3433 16 14  | 3 2   | 12 11 | 1 0  | 2 1   | 5 3   | 23.46 |
| IPR013222 | 35 | 84 35 35    | 0 0   | 0 0   | 0 0  | 0 0   | 0 0   | 20.19 |
| IPR013525 | 35 | 5164 13 10  | 1 0   | 12 8  | 1 0  | 12 8  | 6 4   | 3.15  |
| IPR018111 | 35 | 512 13 7    | 7 4   | 16 9  | 0 0  | 1 0   | 14 8  | 16.41 |
| IPR021129 | 35 | 146 1 0     | 0 0   | 6 5   | 2 0  | 5 5   | 25 23 | 11.94 |
| PF00753   | 35 | 1852 26 23  | 2 0   | 8 3   | 3 0  | 6 2   | 5 3   | 13.58 |
| IPR000326 | 36 | 2777 20 19  | 0 0   | 1 1   | 0 0  | 5 5   | 6 5   | 15.37 |
| IPR000961 | 36 | 1375 0 0    | 0 0   | 7 4   | 5 1  | 9 3   | 25 16 | 23.38 |
| IPR001025 | 36 | 520 0 0     | 0 0   | 21 15 | 0 0  | 15 5  | 18 9  | 11.9  |
| IPR001647 | 36 | 12887 34 32 | 1 0   | 6 4   | 0 0  | 0 0   | 0 0   | 23.51 |
| IPR001846 | 36 | 397 5 5     | 0 0   | 0 0   | 0 0  | 0 0   | 32 32 | 16.29 |
| IPR001926 | 36 | 5735 20 15  | 4 2   | 8 6   | 0 0  | 9 6   | 4 2   | 15.23 |
| IPR002350 | 36 | 799 0 0     | 0 0   | 2 2   | 0 0  | 2 2   | 32 31 | 31.32 |
| IPR006059 | 36 | 7577 29 25  | 3 1   | 7 5   | 0 0  | 0 0   | 0 0   | 2.9   |
| IPR006612 | 36 | 672 0 0     | 0 0   | 0 0   | 0 0  | 0 0   | 39 39 | 22.47 |
| IPR006710 | 36 | 798 31 27   | 1 0   | 2 1   | 0 0  | 6 4   | 0 0   | 13.66 |
| IPR006970 | 36 | 108 23 23   | 1 1   | 0 0   | 0 0  | 3 3   | 9 9   | 43.38 |
| IPR013120 | 36 | 1011 25 9   | 0 0   | 4 3   | 1 0  | 0 0   | 25 8  | 17.95 |
| PF07995   | 36 | 603 34 34   | 0 0   | 2 1   | 0 0  | 0 0   | 2 1   | 24.32 |
| IPR000483 | 37 | 1004 0 0    | 0 0   | 0 0   | 0 0  | 0 0   | 37 37 | 23.34 |
| IPR000679 | 37 | 881 0 0     | 0 0   | 17 17 | 0 0  | 10 9  | 10 9  | 39.04 |
| IPR000878 | 37 | 3447 31 29  | 5 3   | 3 3   | 0 0  | 0 0   | 0 0   | 14.89 |
| IPR001140 | 37 | 8844 11 8   | 2 1   | 14 12 | 2 0  | 8 5   | 7 5   | 3.17  |
| IPR003347 | 37 | 1066 1 1    | 0 0   | 19 10 | 0 0  | 13 4  | 12 15 | 11.4  |
| IPR004010 | 37 | 1463 33 23  | 9 0   | 4 0   | 0 0  | 0 0   | 5 5   | 13    |
| IPR004039 | 37 | 929 28 25   | 7 4   | 5 5   | 0 0  |       |       |       |

|           |    |             |       |       |      |       |       |       |
|-----------|----|-------------|-------|-------|------|-------|-------|-------|
| IPR000515 | 38 | 28806 33 27 | 2 1   | 7 3   | 0 0  | 0 0   | 2 1   | 9.58  |
| IPR000608 | 38 | 2138 1 1    | 0 0   | 15 13 | 3 2  | 9 7   | 13 11 | 26.33 |
| IPR001031 | 38 | 1095 38 22  | 0 0   | 10 1  | 0 0  | 11 0  | 14 0  | 11.97 |
| IPR001159 | 38 | 2009 3 2    | 1 0   | 22 15 | 4 0  | 17 2  | 20 13 | 17.24 |
| IPR001507 | 38 | 593 0 0     | 0 0   | 0 0   | 0 0  | 0 0   | 35 35 | 9.12  |
| IPR001547 | 38 | 908 32 26   | 5 1   | 4 3   | 0 0  | 3 2   | 0 0   | 7.38  |
| IPR002123 | 38 | 3441 23 23  | 0 0   | 8 5   | 0 0  | 3 3   | 7 4   | 14.98 |
| IPR004046 | 38 | 4604 6 4    | 0 0   | 13 7  | 3 0  | 14 8  | 16 11 | 11.29 |
| IPR010259 | 38 | 786 23 19   | 0 0   | 15 13 | 0 0  | 6 3   | 1 0   | 16.41 |
| IPR018337 | 38 | 741 38 38   | 0 0   | 0 0   | 0 0  | 0 0   | 0 0   | 15.82 |
| IPR018453 | 38 | 561 0 0     | 0 0   | 0 0   | 0 0  | 0 0   | 35 35 | 29.52 |
| IPR000270 | 39 | 541 0 0     | 0 0   | 22 16 | 0 0  | 14 8  | 14 7  | 16.6  |
| IPR000445 | 39 | 869 31 21   | 10 1  | 4 0   | 0 0  | 0 0   | 6 3   | 31.74 |
| IPR000524 | 39 | 8849 39 36  | 1 0   | 4 1   | 0 0  | 0 0   | 0 0   | 23.22 |
| IPR001024 | 39 | 454 6 4     | 1 1   | 2 2   | 0 0  | 0 0   | 26 24 | 12.17 |
| IPR002223 | 39 | 1308 1 1    | 0 0   | 0 0   | 0 0  | 0 0   | 38 38 | 31.8  |
| IPR002831 | 39 | 610 24 22   | 17 15 | 0 0   | 1 1  | 0 0   | 0 0   | 9.53  |
| IPR002889 | 39 | 222 0 0     | 0 0   | 8 4   | 0 0  | 16 16 | 25 21 | 20.93 |
| IPR005546 | 39 | 1277 33 32  | 0 0   | 7 6   | 0 0  | 0 0   | 0 0   | 2.77  |
| IPR013078 | 39 | 3975 13 12  | 0 0   | 14 12 | 2 1  | 6 5   | 6 4   | 18.83 |
| IPR002909 | 40 | 585 10 9    | 0 0   | 10 7  | 4 1  | 7 3   | 21 16 | 15.41 |
| IPR001199 | 40 | 1224 2 1    | 0 0   | 12 3  | 3 0  | 24 14 | 15 9  | 23.74 |
| IPR001895 | 40 | 681 0 0     | 0 0   | 0 0   | 1 0  | 9 7   | 31 29 | 15.35 |
| IPR002130 | 40 | 2565 10 9   | 0 0   | 15 6  | 7 0  | 13 4  | 17 9  | 35    |
| IPR002772 | 40 | 1010 22 21  | 1 0   | 3 2   | 0 0  | 16 15 | 1 0   | 24.15 |
| IPR002999 | 40 | 222 0 0     | 0 0   | 7 7   | 0 0  | 2 2   | 29 29 | 14.75 |
| IPR003014 | 40 | 360 11 10   | 0 0   | 9 5   | 0 0  | 0 0   | 0 0   | 15.08 |
| IPR005158 | 40 | 509 39 36   | 1 0   | 0 0   | 0 0  | 4 2   | 1 0   | 13.42 |
| IPR006047 | 40 | 2832 30 21  | 4 1   | 7 2   | 0 0  | 12 8  | 4 0   | 17.18 |
| IPR011498 | 40 | 611 2 1     | 5 2   | 15 12 | 3 1  | 4 2   | 18 13 | 21.75 |
| IPR011709 | 40 | 1113 7 3    | 0 0   | 22 13 | 8 1  | 10 3  | 19 9  | 19.32 |
| IPR013378 | 40 | 355 40 40   | 0 0   | 0 0   | 0 0  | 0 0   | 0 0   | 24.44 |
| IPR013658 | 40 | 843 31 27   | 6 3   | 1 1   | 0 0  | 2 2   | 5 3   | 14.93 |
| IPR013753 | 40 | 1290 5 4    | 1 0   | 4 4   | 1 1  | 7 2   | 29 24 | 16.3  |
| IPR017868 | 40 | 184 15 14   | 5 4   | 3 2   | 5 5  | 0 0   | 14 13 | 6.57  |
| IPR000313 | 41 | 549 0 0     | 0 0   | 23 18 | 2 1  | 4 0   | 24 17 | 19.47 |
| IPR000569 | 41 | 824 1 1     | 0 0   | 12 7  | 6 1  | 11 4  | 27 17 | 22.75 |
| IPR000866 | 41 | 3680 34 31  | 0 0   | 6 4   | 2 0  | 3 2   | 3 1   | 17.58 |
| IPR000991 | 41 | 5155 24 9   | 6 0   | 13 5  | 9 0  | 19 6  | 15 4  | 24.68 |
| IPR000998 | 41 | 563 8 7     | 0 0   | 0 0   | 0 0  | 0 0   | 34 33 | 16.48 |
| IPR001781 | 41 | 3853 0 0    | 0 0   | 9 9   | 0 0  | 2 2   | 23 23 | 27.73 |
| IPR002557 | 41 | 3975 2 1    | 1 0   | 0 0   | 0 0  | 1 1   | 36 35 | 20.17 |
| IPR002931 | 41 | 1672 26 24  | 4 2   | 5 1   | 0 0  | 7 2   | 8 7   | 16.57 |
| IPR004242 | 41 | 749 0 0     | 0 0   | 44 43 | 0 0  | 0 0   | 0 0   | 27.21 |
| IPR006644 | 41 | 428 39 38   | 0 0   | 0 0   | 0 0  | 2 1   | 1 1   | 27.75 |
| IPR007730 | 41 | 1428 40 40  | 0 0   | 1 1   | 0 0  | 0 0   | 0 0   | 8.97  |
| IPR009875 | 41 | 1568 41 41  | 0 0   | 0 0   | 0 0  | 0 0   | 0 0   | 4.04  |
| IPR011080 | 41 | 177 41 41   | 0 0   | 0 0   | 0 0  | 0 0   | 0 0   | 26.95 |
| IPR011123 | 41 | 501 40 39   | 1 1   | 0 0   | 0 0  | 0 0   | 1 0   | 18.91 |
| IPR012312 | 41 | 2074 36 35  | 2 1   | 0 0   | 0 0  | 0 0   | 0 0   | 12.58 |
| IPR000195 | 42 | 1537 0 0    | 0 0   | 6 5   | 3 0  | 10 7  | 26 20 | 13.86 |
| IPR000467 | 42 | 867 0 0     | 0 0   | 18 6  | 3 1  | 15 6  | 30 16 | 33.78 |
| IPR000551 | 42 | 4113 42 40  | 2 0   | 1 1   | 0 0  | 0 0   | 0 0   | 22.19 |
| IPR000700 | 42 | 172 41 30   | 12 1  | 1 0   | 0 0  | 0 0   | 0 0   | 11.54 |
| IPR001223 | 42 | 560 28 24   | 3 2   | 5 5   | 0 0  | 7 4   | 5 4   | 7.12  |
| IPR002109 | 42 | 2500 11 16  | 4 2   | 16 9  | 1 0  | 14 7  | 11 2  | 16.51 |
| IPR003616 | 42 | 527 2 1     | 1 0   | 25 12 | 6 1  | 11 3  | 26 18 | 44.67 |
| IPR006104 | 42 | 930 37 30   | 4 0   | 8 4   | 0 0  | 10 3  | 4 0   | 17.29 |
| IPR007502 | 42 | 1426 8 2    | 0 0   | 19 9  | 9 1  | 12 4  | 24 13 | 26.21 |
| IPR011712 | 42 | 2229 42 40  | 0 0   | 2 0   | 0 0  | 0 0   | 0 0   | 21.6  |
| IPR013229 | 42 | 525 31 28   | 0 0   | 14 11 | 0 0  | 0 0   | 0 0   | 16.31 |
| PF08279   | 42 | 1886 37 34  | 7 4   | 0 0   | 0 0  | 0 0   | 1 1   | 18.20 |
| IPR000198 | 43 | 1422 0 0    | 0 0   | 4 2   | 0 0  | 10 3  | 40 32 | 17.53 |
| IPR000668 | 43 | 1205 13 13  | 7 7   | 17 15 | 4 1  | 0 0   | 9 6   | 28.85 |
| IPR000863 | 43 | 1309 28 22  | 0 0   | 18 13 | 0 0  | 0 0   | 6 5   | 10.94 |
| IPR001828 | 43 | 3282 19 16  | 3 1   | 4 2   | 0 0  | 0 0   | 23 20 | 4.45  |
| IPR002044 | 43 | 342 20 14   | 3 0   | 12 11 | 0 0  | 5 2   | 2 2   | 21.88 |
| IPR003344 | 43 | 1075 39 39  | 6 6   | 0 0   | 0 0  | 0 0   | 0 0   | 15.76 |
| IPR003877 | 43 | 466 1 1     | 0 0   | 5 3   | 5 2  | 4 0   | 34 33 | 14.06 |
| IPR005814 | 43 | 4508 38 36  | 0 0   | 4 3   | 0 0  | 3 2   | 0 0   | 25.86 |
| IPR006154 | 43 | 3057 32 24  | 7 2   | 16 9  | 4 0  | 3 0   | 7 1   | 17.16 |
| IPR007627 | 43 | 8103 43 39  | 0 0   | 5 1   | 0 0  | 0 0   | 0 0   | 13.8  |
| IPR011490 | 43 | 859 43 43   | 0 0   | 0 0   | 0 0  | 0 0   | 0 0   | 16.17 |
| IPR013096 | 43 | 4346 31 27  | 5 3   | 3 1   | 0 0  | 7 6   | 2 2   | 8.3   |
| IPR013242 | 43 | 864 0 0     | 0 0   | 43 36 | 0 0  | 9 2   | 2 0   | 19.12 |
| IPR018355 | 43 | 629 0 0     | 0 0   | 6 1   | 1 0  | 5 0   | 44 36 | 14.91 |
| IPR020801 | 43 | 1066 34 18  | 0 0   | 0 0   | 0 0  | 25 9  | 4 0   | 27.5  |
| IPR020806 | 43 | 1331 42 24  | 0 0   | 15 2  | 0 0  | 14 0  | 10 0  | 23.52 |
| PF07859   | 43 | 2754 17 14  | 0 0   | 5 3   | 0 0  | 11 8  | 1 0   | 17.3  |
| IPR001646 | 44 | 3645 41 40  | 1 0   | 2 0   | 1 1  | 0 0   | 3 1   | 21.42 |
| IPR001759 | 44 | 147 11 10   | 4 4   | 0 0   | 0 0  | 0 0   | 30 29 | 16.86 |
| IPR001764 | 44 | 1729 26 24  | 2 0   | 3 2   | 0 0  | 17 15 | 1 0   | 22.34 |
| IPR001845 | 44 | 4082 27 22  | 22 17 | 0 0   | 0 0  | 0 0   | 0 0   | 20.65 |
| IPR004875 | 44 | 903 1 1     | 0 0   | 1 0   | 0 0  | 32 27 | 18 13 | 15.45 |
| IPR006016 | 44 | 5268 24 20  | 7 5   | 17 15 | 0 0  | 0 0   | 0 0   | 13.08 |
| IPR008254 | 44 | 2061 23 16  | 4 1   | 9 4   | 2 0  | 19 13 | 6 1   | 10.11 |
| IPR011098 | 44 | 497 44 44   | 0 0   | 0 0   | 0 0  | 0 0   | 0 0   | 16.21 |
| IPR018108 | 44 | 8827 0 0    | 0 0   | 24 21 | 0 0  | 21 18 | 5 2   | 17.34 |
| IPR020841 | 44 | 1011 35 19  | 0 0   | 10 1  | 0 0  | 21 7  | 12 2  | 42.62 |
| IPR021720 | 44 | 554 25 24   | 3 2   | 18 18 | 0 0  | 0 0   | 0 0   | 17.54 |
| IPR001753 | 45 | 6032 38 24  | 2 0   | 14 11 | 0 0  | 2 3   | 5 2   | 24.33 |
| IPR002645 | 45 | 3187 34 30  | 3 0   | 3 2   | 1 0  | 2 0   | 10 9  | 6.82  |
| IPR005828 | 45 | 6094 3 2    | 0 0   | 18 17 | 0 0  | 17 16 | 8 7   | 9.64  |
| IPR006638 | 45 | 7712 35 24  | 12 2  | 12 3  | 3 0  | 5 1   | 9 3   | 8.49  |
| IPR017448 | 45 | 1059 0 0    | 0 0   | 13 10 | 2 2  | 0 0   | 29 26 | 32.6  |
| PF00326   | 45 | 2587 23 17  | 4 0   | 5 2   | 4 0  | 17 12 | 10 7  | 9.5   |
| IPR002197 | 46 | 4821 45 41  | 0 0   | 5 1   | 0 0  | 0 0   | 2 0   | 26.19 |
| IPR003613 | 46 | 856 6 4     | 0 0   | 25 15 | 7 1  | 15 9  | 14 6  | 30.11 |
| IPR000159 | 47 | 644 0 0     | 0 0   | 0 0   | 0 0  | 10 8  | 38 36 | 9.19  |
| IPR000832 | 47 | 741 0 0     | 0 0   | 0 0   | 0 0  | 0 0   | 44 44 | 14.08 |
| IPR000845 | 47 | 2678 15 11  | 0 0   | 5 3   | 0 0  | 33 29 | 0 0   | 9.54  |
| IPR002893 | 47 | 856 0 0     | 0 0   | 12 8  | 3 1  | 9 6   | 31 26 | 35.31 |
| IPR003410 | 47 | 234 28 26   | 0 0   | 0 0   | 0 0  | 0 0   | 18 16 | 20.6  |
| IPR004332 | 47 | 679 0 0     | 0 0   | 52 52 | 0 0  | 2 2   | 0 0   | 17.83 |
| IPR005471 | 47 | 2639 36 31  | 15 10 | 3 2   | 0 0  | 0 0   | 0 0   | 15.97 |
| IPR006935 | 47 | 751 33 29   | 6 3   | 8 4   | 0 0  | 6 1   | 6 4   | 7.31  |
| IPR008250 | 47 | 5413 19 12  | 8 1   | 17 11 | 8 1  | 10 3  | 16 9  | 20.78 |
| IPR011583 | 47 | 1032 30 25  | 3 0   | 4 4   | 0 0  | 1 4   | 9 4   | 20.85 |
| IPR019557 | 47 | 787 0 0     | 0 0   | 55 55 | 0 0  | 0 0   | 0 0   | 15.53 |
| IPR000203 | 48 | 335 0 0     | 0 0   | 0 0   | 0 0  | 0 0   | 44 44 | 31.72 |
| IPR001867 | 48 | 9499 47 43  | 0 0   | 5 1   | 0 0  | 0 0   | 1 0   | 28.45 |
| IPR003903 | 48 | 675 0 0     | 0 0   | 16 14 | 0 0  | 22 10 | 26 14 | 36.11 |
| IPR008258 | 48 | 2722 48 47  | 0 0   | 1 0   | 0 0  | 1 1   | 0 0   | 15.4  |
| IPR011658 | 48 | 168 46 44   | 1 0   | 1 0   | 0 0  | 2 1   | 1 1   | 14.57 |
| IPR018060 | 48 | 9878 47 41  | 0 0   | 7 1   | 0 0  | 0 0   | 0 0   | 19.6  |
| PD936484  | 48 | 99 14 14    | 0 0   | 10 8  | 0 0  | 4 1   | 19 16 | 3.08  |
| IPR000082 | 49 | 300 2 2     | 0 0   | 0 0   | 0 0  | 0 0   | 48 48 | 6.04  |
| IPR000757 | 49 | 950 40 38   | 1 1   | 6 6   | 0 0  | 1 0   | 1 0   | 15.43 |
| IPR001007 | 49 | 821 0 0     | 0 0   | 0 0   | 0 0  | 0 0   | 48 48 | 30.55 |
| IPR001609 | 49 | 932 0 0     | 0 0   | 17 13 | 10 8 | 13 6  | 23 16 | 30.89 |
| IPR002181 | 49 | 783 3 1     | 0 0   | 0 0   | 3 2  | 0 0   | 45 42 | 30.37 |
| IPR002917 | 49 | 7802 22 12  | 6 0   | 16 6  | 14 4 | 14 6  | 14 6  | 25.97 |
| IPR002937 | 49 | 2592 24 21  | 2 0   | 15 13 | 1 1  | 8 6   | 7 5   | 8.67  |
| IPR018242 | 49 | 249 49 49   | 0 0   | 0 0   | 0 0  | 0 0   | 0 0   | 52.3  |
| IPR013069 | 50 | 590 5 2     | 0 0   | 22 14 | 1 0  | 12 8  | 23 16 | 5.52  |
| IPR020842 | 50 | 1075 39 20  | 0 0   | 15 2  | 0 0  | 24 8  | 11 0  | 29.15 |
| PF07691   | 50 | 104 41 39   | 0 0   | 2 0   | 1 1  | 1 1   | 10 7  | 5.2   |
| IPR000433 | 51 | 616 0 0     | 0 0   | 22 11 | 1 0  | 14 7  | 32 22 | 29.28 |
| IPR001242 | 51 | 3909 49 32  | 0 0   | 2 0   | 0 0  | 20 4  | 10 0  | 16.11 |
| IPR002575 | 51 | 3687 13 29  | 0 0   | 9 5   | 0 0  | 13 13 | 4 1   | 4.18  |
| IPR002860 | 51 | 3215 45 44  | 3 2   | 1 1   | 0 0  | 2 2   | 3 3   | 47.04 |
| IPR002912 | 51 | 6864 39 26  | 15 4  | 16 8  | 1 1  | 0 0   | 4 1   | 10.11 |
| IPR011659 | 51 | 3804 48 43  | 4 2   | 5 0   | 0 0  | 4 1   | 2 0   | 24.78 |
| IPR016047 | 51 | 3064 52 51  | 0 0   | 3 2   | 0 0  | 0 0   | 0 0   | 32.29 |
| IPR000330 | 52 | 423 11 9    | 0 0   | 26 15 | 5 1  | 15 5  | 15 5  | 5.42  |
| IPR008454 | 52 | 1671 48 46  | 7 5   | 0 0   | 0 0  | 0 0   | 0 0   | 15.86 |
| IPR013017 | 52 | 539 41 39   | 3 1   | 0 0   | 0 0  | 0 0   | 11 7  | 17.38 |
| IPR013517 | 52 | 701 49 45   | 3 2   | 0 0   | 0 0  | 1 0   |       |       |

|           |     |             |       |       |      |       |       |       |
|-----------|-----|-------------|-------|-------|------|-------|-------|-------|
| IPR001041 | 54  | 5141 45 29  | 12 4  | 12 2  | 1 0  | 13 2  | 8 0   | 21.34 |
| IPR002049 | 54  | 2591 2 1    | 0 0   | 0 0   | 0 0  | 1 0   | 52 50 | 35.18 |
| IPR003034 | 54  | 679 2 2     | 0 0   | 24 16 | 3 1  | 12 6  | 30 22 | 24.67 |
| IPR008207 | 54  | 2758 52 40  | 10 0  | 4 0   | 0 0  | 2 6   | 0 0   | 11.55 |
| IPR012934 | 54  | 1794 0 0    | 0 0   | 0 0   | 0 0  | 0 0   | 66 66 | 21.93 |
| IPR014030 | 54  | 2798 41 19  | 1 0   | 10 3  | 1 0  | 29 7  | 16 1  | 19.94 |
| IPR003953 | 55  | 3202 44 29  | 8 0   | 6 2   | 4 3  | 10 1  | 4 3   | 17.81 |
| IPR006674 | 55  | 1702 51 43  | 9 2   | 2 0   | 0 0  | 1 1   | 2 1   | 8.79  |
| IPR005680 | 55  | 5012 24 18  | 5 1   | 11 7  | 0 0  | 15 8  | 16 13 | 12.12 |
| IPR008333 | 55  | 2968 34 27  | 2 0   | 12 6  | 5 2  | 10 4  | 4 2   | 16.21 |
| PTHR23083 | 55  | 1369 53 49  | 1 0   | 5 2   | 1 0  | 3 1   | 4 0   | 1.36  |
| SM00316   | 55  | 8844 32 23  | 10 3  | 16 2  | 8 2  | 13 3  | 19 2  | 22.34 |
| IPR000225 | 56  | 3573 3 2    | 0 0   | 36 29 | 3 0  | 4 0   | 27 19 | 16.54 |
| IPR000306 | 56  | 856 0 0     | 0 0   | 14 9  | 9 7  | 18 7  | 30 18 | 33.31 |
| IPR001752 | 56  | 1780 0 0    | 0 0   | 5 3   | 0 0  | 9 3   | 19 10 | 31.87 |
| IPR004087 | 56  | 5003 15 6   | 8 5   | 21 11 | 5 3  | 6 3   | 27 15 | 16.92 |
| IPR007253 | 56  | 764 56 55   | 2 1   | 0 0   | 0 0  | 0 0   | 0 0   | 25.97 |
| IPR013154 | 56  | 8236 29 23  | 1 0   | 5 3   | 1 0  | 28 23 | 2 1   | 32.32 |
| IPR018392 | 56  | 754 37 35   | 0 0   | 15 14 | 0 0  | 6 2   | 4 1   | 13.2  |
| IPR000859 | 57  | 2228 2 2    | 0 0   | 0 0   | 1 1  | 0 0   | 51 51 | 17.87 |
| IPR001092 | 57  | 3445 3 3    | 0 0   | 13 13 | 0 0  | 3 3   | 39 39 | 24.63 |
| IPR001638 | 57  | 6231 47 40  | 7 2   | 7 4   | 0 0  | 0 0   | 5 3   | 6.11  |
| IPR002479 | 57  | 1811 57 57  | 0 0   | 0 0   | 0 0  | 0 0   | 0 0   | 46.24 |
| IPR004365 | 57  | 5050 33 23  | 13 6  | 18 11 | 5 2  | 6 1   | 6 2   | 16.4  |
| IPR004839 | 57  | 9934 25 23  | 3 2   | 7 6   | 0 0  | 12 12 | 10 10 | 10.73 |
| IPR006584 | 57  | 206 49 43   | 13 8  | 0 0   | 0 0  | 1 0   | 0 0   | 27.11 |
| IPR007280 | 57  | 483 52 62   | 2 2   | 0 0   | 0 0  | 4 0   | 0 0   | 17.15 |
| IPR008906 | 57  | 660 0 0     | 0 0   | 48 44 | 0 0  | 4 2   | 14 11 | 15.83 |
| IPR009056 | 57  | 1276 54 52  | 2 0   | 3 1   | 0 0  | 0 0   | 2 2   | 23.35 |
| IPR013247 | 57  | 504 55 55   | 0 0   | 0 0   | 0 0  | 0 0   | 0 0   | 18.41 |
| IPR000315 | 58  | 1284 2 2    | 1 1   | 7 6   | 6 5  | 1 1   | 39 38 | 21.86 |
| IPR003305 | 58  | 357 57 55   | 3 1   | 0 0   | 0 0  | 0 0   | 0 0   | 6.11  |
| IPR005877 | 58  | 436 59 59   | 0 0   | 0 0   | 0 0  | 0 0   | 0 0   | 42.52 |
| IPR007219 | 58  | 2494 0 0    | 0 0   | 0 0   | 0 0  | 60 60 | 0 0   | 3.93  |
| IPR000910 | 59  | 1711 0 0    | 0 0   | 18 13 | 3 2  | 14 14 | 32 28 | 19.19 |
| IPR002509 | 59  | 2473 48 47  | 1 0   | 0 0   | 0 0  | 8 8   | 3 3   | 15.11 |
| IPR003587 | 59  | 258 43 32   | 24 13 | 0 0   | 0 0  | 4 2   | 4 3   | 10.97 |
| IPR003653 | 59  | 1031 2 1    | 0 0   | 53 53 | 0 0  | 5 4   | 11 9  | 10.86 |
| IPR005821 | 59  | 3158 3 1    | 2 2   | 12 5  | 3 0  | 2 0   | 50 38 | 11.39 |
| IPR000219 | 60  | 1346 0 0    | 0 0   | 0 0   | 0 0  | 13 6  | 51 44 | 14    |
| IPR002938 | 60  | 3881 33 17  | 10 1  | 11 5  | 0 0  | 31 18 | 6 4   | 13.19 |
| IPR003646 | 60  | 1116 59 59  | 0 0   | 0 0   | 0 0  | 0 0   | 0 0   | 19.54 |
| IPR006094 | 60  | 4499 31 19  | 5 0   | 13 7  | 2 0  | 30 21 | 2 0   | 14.74 |
| IPR002156 | 61  | 2345 32 40  | 1 0   | 27 21 | 1 0  | 13 9  | 27 21 | 15.99 |
| IPR006597 | 61  | 8730 48 41  | 3 0   | 5 2   | 0 0  | 6 4   | 4 3   | 19.2  |
| IPR018289 | 61  | 1317 1 1    | 0 0   | 62 59 | 0 0  | 3 0   | 5 3   | 15.1  |
| IPR006530 | 62  | 2680 59 58  | 1 1   | 1 1   | 0 0  | 0 0   | 4 3   | 21.3  |
| IPR019787 | 62  | 248 0 0     | 0 0   | 35 18 | 0 0  | 19 8  | 32 18 | 27.47 |
| IPR000795 | 63  | 7334 22 13  | 8 0   | 31 20 | 10 2 | 17 6  | 25 14 | 26.52 |
| IPR001899 | 63  | 287 62 62   | 2 2   | 0 0   | 0 0  | 0 0   | 1 1   | 14.37 |
| IPR007527 | 63  | 1295 12 12  | 1 1   | 47 41 | 1 1  | 6 2   | 8 3   | 28.83 |
| IPR011600 | 63  | 670 50 48   | 1 0   | 2 2   | 0 0  | 3 2   | 10 10 | 10.23 |
| IPR001433 | 64  | 3872 38 26  | 2 0   | 14 5  | 6 2  | 22 8  | 8 3   | 19.87 |
| IPR001683 | 64  | 1235 0 0    | 0 0   | 9 4   | 4 1  | 32 20 | 40 26 | 14.33 |
| IPR001791 | 64  | 1500 15 11  | 0 0   | 0 0   | 0 0  | 0 0   | 51 47 | 15.05 |
| IPR003591 | 64  | 1255 8 6    | 0 0   | 8 5   | 2 1  | 6 4   | 46 42 | 29.98 |
| IPR006665 | 64  | 3491 66 66  | 0 0   | 0 0   | 0 0  | 0 0   | 0 0   | 22.73 |
| IPR012680 | 64  | 182 29 26   | 0 0   | 0 0   | 0 0  | 0 0   | 35 32 | 5.24  |
| IPR013149 | 64  | 8763 37 22  | 3 0   | 10 8  | 1 0  | 31 20 | 8 1   | 14.11 |
| IPR000792 | 65  | 7609 64 61  | 0 0   | 4 1   | 0 0  | 0 0   | 0 0   | 26.14 |
| IPR001087 | 65  | 2835 42 39  | 4 3   | 12 12 | 0 0  | 7 5   | 4 4   | 11.42 |
| IPR001715 | 65  | 2265 0 0    | 0 0   | 9 6   | 2 1  | 15 6  | 47 37 | 11.92 |
| IPR001919 | 65  | 342 65 63   | 2 0   | 0 0   | 0 0  | 0 0   | 0 0   | 29.68 |
| IPR003439 | 65  | 5781 38 28  | 6 0   | 21 11 | 2 0  | 15 7  | 13 9  | 20.34 |
| IPR004089 | 65  | 7478 56 47  | 12 5  | 9 4   | 0 0  | 0 0   | 1 1   | 29.02 |
| IPR011545 | 65  | 693 24 14   | 4 0   | 31 19 | 3 0  | 11 4  | 18 12 | 7.6   |
| PF07721   | 65  | 944 53 44   | 4 0   | 3 0   | 4 0  | 14 9  | 7 3   | 14.79 |
| IPR000980 | 66  | 1788 0 0    | 0 0   | 1 1   | 0 0  | 2 0   | 60 58 | 19.41 |
| IPR001466 | 66  | 2678 45 41  | 1 0   | 4 3   | 1 0  | 20 16 | 2 2   | 9.69  |
| IPR001509 | 66  | 9181 34 32  | 0 0   | 13 11 | 0 0  | 15 13 | 6 5   | 15.9  |
| IPR001660 | 66  | 1427 3 3    | 0 0   | 7 5   | 1 0  | 7 3   | 57 51 | 14.04 |
| IPR001876 | 66  | 1157 3 1    | 1 1   | 23 17 | 7 5  | 9 4   | 40 30 | 35.35 |
| IPR003610 | 66  | 582 62 55   | 10 3  | 0 0   | 0 0  | 0 0   | 3 1   | 30.75 |
| IPR013091 | 67  | 516 2 1     | 0 0   | 9 8   | 0 0  | 0 0   | 56 55 | 32.33 |
| IPR001279 | 68  | 6872 48 41  | 11 4  | 14 10 | 4 0  | 4 1   | 6 1   | 28.18 |
| IPR002219 | 68  | 1411 0 0    | 0 0   | 5 1   | 2 0  | 10 3  | 64 53 | 23.32 |
| IPR000449 | 69  | 1238 2 1    | 1 0   | 18 10 | 5 0  | 24 15 | 34 21 | 30.6  |
| IPR001356 | 69  | 5025 0 0    | 0 0   | 23 22 | 0 0  | 5 4   | 49 47 | 22.25 |
| IPR002172 | 70  | 4355 0 0    | 0 0   | 0 0   | 0 0  | 0 0   | 70 70 | 46.38 |
| IPR001258 | 71  | 1557 50 43  | 11 5  | 6 2   | 0 0  | 0 0   | 20 14 | 32.86 |
| IPR001394 | 71  | 1958 0 0    | 0 0   | 27 19 | 4 0  | 19 11 | 37 28 | 19.69 |
| IPR001343 | 73  | 7002 71 71  | 2 2   | 0 0   | 0 0  | 0 0   | 0 0   | 43.31 |
| IPR002048 | 73  | 4340 4 2    | 0 0   | 25 16 | 5 2  | 7 4   | 43 35 | 27.9  |
| IPR003607 | 73  | 5207 65 53  | 4 0   | 3 1   | 2 1  | 0 0   | 12 6  | 12.45 |
| IPR000601 | 74  | 290 54 48   | 15 10 | 0 0   | 0 0  | 0 0   | 13 11 | 12.4  |
| IPR001487 | 74  | 1676 0 0    | 0 0   | 29 15 | 10 2 | 18 5  | 53 34 | 20.19 |
| IPR001633 | 74  | 5574 71 65  | 0 0   | 11 5  | 0 0  | 0 0   | 1 0   | 27.09 |
| IPR006652 | 74  | 4154 23 20  | 2 0   | 19 12 | 6 1  | 8 3   | 30 22 | 26.54 |
| IPR001138 | 75  | 3296 0 0    | 0 0   | 0 0   | 0 0  | 73 73 | 0 0   | 37.51 |
| IPR003644 | 75  | 776 59 59   | 0 0   | 1 0   | 0 0  | 0 0   | 17 16 | 16.3  |
| IPR003959 | 75  | 1042 31 22  | 6 1   | 24 12 | 2 1  | 27 13 | 21 8  | 5.7   |
| IPR008009 | 75  | 634 77 75   | 2 1   | 0 0   | 0 0  | 2 1   | 0 0   | 34.82 |
| IPR015880 | 75  | 16754 0 0   | 0 0   | 4 3   | 2 1  | 11 9  | 63 61 | 39.71 |
| IPR000408 | 76  | 4107 27 24  | 0 0   | 16 13 | 2 2  | 11 4  | 31 23 | 30.05 |
| IPR001357 | 76  | 2471 12 10  | 2 0   | 34 16 | 7 1  | 27 14 | 39 22 | 11.99 |
| IPR005084 | 76  | 231 72 64   | 10 4  | 0 0   | 0 0  | 3 1   | 0 0   | 12.93 |
| IPR002477 | 77  | 2074 69 68  | 0 0   | 7 4   | 0 0  | 1 0   | 5 3   | 17.51 |
| IPR000086 | 78  | 7943 52 46  | 4 1   | 14 11 | 1 0  | 13 7  | 14 8  | 19.77 |
| IPR001610 | 78  | 2769 64 44  | 21 4  | 8 3   | 0 0  | 2 1   | 11 7  | 16.64 |
| IPR001932 | 78  | 3252 47 40  | 4 0   | 20 16 | 0 0  | 9 7   | 5 3   | 19.02 |
| IPR002126 | 79  | 8542 49 44  | 2 1   | 0 0   | 0 0  | 0 0   | 34 29 | 20.14 |
| IPR003088 | 79  | 5111 77 73  | 0 0   | 4 1   | 0 0  | 0 0   | 1 1   | 19.43 |
| IPR000626 | 80  | 2746 0 0    | 0 0   | 35 20 | 11 3 | 23 8  | 45 28 | 11.96 |
| IPR001202 | 80  | 1842 0 0    | 0 0   | 21 17 | 8 5  | 18 9  | 52 42 | 29.38 |
| IPR013655 | 80  | 3435 67 49  | 18 3  | 8 2   | 0 0  | 10 1  | 15 9  | 9.81  |
| IPR013766 | 80  | 5306 25 13  | 8 3   | 35 23 | 4 1  | 8 4   | 26 19 | 17.98 |
| IPR019948 | 81  | 864 83 83   | 0 0   | 0 0   | 0 0  | 0 0   | 0 0   | 17.35 |
| IPR020635 | 81  | 1455 0 0    | 0 0   | 6 6   | 0 0  | 0 0   | 70 70 | 35.98 |
| IPR012854 | 82  | 414 83 83   | 0 0   | 0 0   | 0 0  | 0 0   | 0 0   | 21.13 |
| IPR015940 | 82  | 1080 3 3    | 0 0   | 24 12 | 9 4  | 22 6  | 52 31 | 21.44 |
| IPR020683 | 82  | 869 18 14   | 0 0   | 21 16 | 3 1  | 30 21 | 34 24 | 3.82  |
| PF05729   | 82  | 1012 33 22  | 5 1   | 1 0   | 0 0  | 41 28 | 26 19 | 9.24  |
| IPR000884 | 83  | 2482 1 0    | 0 0   | 3 3   | 2 2  | 0 0   | 72 71 | 34.54 |
| IPR001005 | 83  | 5353 1 0    | 0 0   | 51 34 | 6 1  | 23 6  | 33 16 | 22.77 |
| IPR018248 | 83  | 1504 7 5    | 0 0   | 22 10 | 5 1  | 15 3  | 61 46 | 22.77 |
| IPR003660 | 84  | 13626 77 56 | 18 1  | 15 5  | 0 0  | 3 0   | 3 2   | 18.05 |
| IPR013217 | 84  | 1932 60 43  | 1 1   | 5 5   | 0 0  | 31 14 | 12 5  | 13.5  |
| IPR006076 | 85  | 6367 53 30  | 19 0  | 18 6  | 0 0  | 27 13 | 13 8  | 23.95 |
| IPR000157 | 86  | 1447 42 35  | 4 0   | 36 31 | 0 0  | 0 0   | 15 12 | 18.51 |
| IPR001296 | 86  | 9814 66 57  | 5 0   | 16 11 | 1 0  | 11 7  | 5 3   | 15.75 |
| IPR013111 | 86  | 1669 0 0    | 0 0   | 3 3   | 0 0  | 3 3   | 81 81 | 38.88 |
| IPR002909 | 87  | 1290 49 45  | 4 1   | 18 12 | 0 0  | 3 2   | 23 17 | 11.17 |
| IPR008160 | 88  | 6339 51 50  | 1 1   | 1 1   | 0 0  | 3 3   | 35 34 | 33.59 |
| PF07679   | 88  | 2344 10 7   | 0 0   | 0 0   | 0 0  | 0 0   | 82 79 | 6.77  |
| IPR013656 | 90  | 3569 78 56  | 26 7  | 13 3  | 0 0  | 4 0   | 5 2   | 11.53 |
| IPR013767 | 92  | 1934 68 46  | 24 8  | 18 6  | 2 0  | 14 7  | 14 7  | 3.01  |
| IPR000357 | 93  | 2387 30 22  | 5 1   | 39 14 | 3 0  | 38 12 | 36 14 | 16.38 |
| IPR001304 | 93  | 2201 13 9   | 2 1   | 11 6  | 0 0  | 0 0   | 79 71 | 17.19 |
| IPR000644 | 94  | 12487 70 54 | 19 8  | 16 11 | 3 0  | 7 2   | 9 1   | 24.3  |
| IPR001054 | 94  | 2262 66 59  | 1 0   | 15 9  | 3 2  | 5 5   | 11 8  | 17.47 |
| IPR001763 | 94  | 6499 65 52  | 6 2   | 17 12 | 4 1  | 6 2   | 13 7  | 15.5  |
| IPR001214 | 95  | 2064 3 1    | 1 0   | 46 25 | 9 1  | 30 15 | 59 33 | 19.22 |
| IPR018957 | 95  | 846 0 0     | 0 0   | 34 19 | 6 0  | 27 16 | 53 38 | 26.3  |
| IPR019546 | 99  | 505 90 79   | 19 9  | 3 2   | 0 0  | 0 0   | 0 0   | 28.4  |
| IPR000173 | 100 | 10083 96 84 | 12 1  | 2 2   | 0 0  | 4 2   | 7 5   | 21.92 |
| IPR000772 | 101 | 943 81 74   | 2 0   | 3 1   | 3 2  | 5 4   | 16 14 | 9.7   |

|           |     |               |       |         |       |        |         |       |
|-----------|-----|---------------|-------|---------|-------|--------|---------|-------|
| IPR001450 | 114 | 8604 96 53    | 51 10 | 18 5    | 2 0   | 3 0    | 2 0     | 37.74 |
| IPR000742 | 115 | 2393 3 1      | 0 0   | 9 8     | 0 0   | 1 1    | 101 98  | 35.33 |
| IPR017896 | 115 | 7440 102 64   | 40 8  | 10 5    | 0 0   | 7 0    | 5 0     | 28.04 |
| IPR000160 | 116 | 9964 114 102  | 4 0   | 12 3    | 0 0   | 0 0    | 1 0     | 37.27 |
| IPR000209 | 116 | 2901 77 65    | 15 7  | 23 17   | 1 1   | 13 7   | 8 4     | 23.01 |
| IPR005834 | 118 | 12980 66 54   | 9 0   | 30 21   | 5 0   | 18 11  | 23 16   | 15.15 |
| IPR000008 | 119 | 4492 1 0      | 1 1   | 36 25   | 6 3   | 18 2   | 83 61   | 18.78 |
| IPR001623 | 119 | 5971 42 33    | 7 2   | 55 37   | 19 5  | 29 12  | 34 16   | 37.65 |
| IPR000571 | 120 | 3310 0 0      | 0 0   | 59 46   | 18 10 | 25 13  | 48 37   | 34.31 |
| IPR003343 | 122 | 817 118 117   | 6 5   | 1 1     | 0 0   | 0 0    | 0 0     | 16.24 |
| IPR006210 | 123 | 2447 0 0      | 0 0   | 2 1     | 0 0   | 0 0    | 118 117 | 47.78 |
| IPR002482 | 124 | 4022 108 101  | 0 0   | 9 6     | 0 0   | 7 2    | 10 5    | 30.68 |
| IPR000073 | 125 | 11301 75 68   | 3 1   | 24 20   | 0 0   | 29 25  | 6 4     | 19.08 |
| IPR001452 | 127 | 4675 1 0      | 0 0   | 1 0     | 1 1   | 40 16  | 119 95  | 27.6  |
| IPR013027 | 130 | 11611 96 66   | 16 2  | 36 20   | 10 2  | 24 7   | 13 2    | 22.29 |
| IPR017909 | 130 | 2072 126 115  | 15 5  | 3 2     | 0 0   | 1 1    | 1 1     | 6.46  |
| IPR003599 | 132 | 4885 30 25    | 0 0   | 0 0     | 0 0   | 0 0    | 114 109 | 13.81 |
| IPR003661 | 132 | 17858 126 100 | 17 1  | 19 3    | 0 0   | 17 5   | 4 0     | 27.59 |
| IPR000014 | 134 | 10979 110 82  | 29 6  | 16 3    | 1 1   | 10 3   | 19 13   | 6.59  |
| IPR003598 | 135 | 8256 13 10    | 0 0   | 0 0     | 0 0   | 0 0    | 121 118 | 27.35 |
| IPR001254 | 137 | 7721 65 58    | 2 0   | 9 5     | 2 1   | 1 0    | 70 65   | 26.78 |
| IPR000048 | 142 | 3683 31 31    | 0 0   | 37 21   | 12 7  | 15 6   | 75 55   | 26.71 |
| IPR000595 | 143 | 5446 102 87   | 1 0   | 26 14   | 7 2   | 9 4    | 27 17   | 7.69  |
| IPR000873 | 143 | 14157 94 69   | 6 3   | 35 17   | 5 4   | 37 16  | 22 6    | 13.58 |
| IPR005135 | 144 | 3684 40 37    | 0 0   | 82 74   | 2 2   | 17 10  | 20 14   | 16.1  |
| IPR001387 | 147 | 10975 142 139 | 9 7   | 6 3     | 1 0   | 1 0    | 1 0     | 9.23  |
| IPR013216 | 147 | 9908 101 90   | 4 2   | 26 16   | 3 1   | 17 13  | 10 6    | 26.18 |
| IPR001119 | 148 | 2607 148 148  | 0 0   | 1 1     | 0 0   | 0 0    | 0 0     | 22.95 |
| IPR022409 | 152 | 1326 101 84   | 54 39 | 0 0     | 0 0   | 0 0    | 18 14   | 25.08 |
| IPR002198 | 153 | 22866 73 49   | 1 0   | 33 21   | 0 0   | 64 51  | 18 6    | 26.82 |
| IPR001849 | 155 | 4275 1 1      | 0 0   | 21 8    | 13 5  | 44 17  | 129 93  | 9.71  |
| IPR001878 | 155 | 4217 0 0      | 0 0   | 102 76  | 15 9  | 41 19  | 56 31   | 45.6  |
| IPR013105 | 159 | 2038 124 109  | 5 1   | 16 4    | 6 1   | 19 9   | 27 10   | 13.17 |
| IPR011701 | 164 | 29849 54 48   | 2 1   | 39 34   | 0 0   | 59 55  | 23 22   | 0.54  |
| IPR002035 | 166 | 3775 80 68    | 7 2   | 13 5    | 4 1   | 13 5   | 83 70   | 10.39 |
| IPR001245 | 167 | 4502 11 8     | 0 0   | 103 98  | 4 1   | 8 5    | 51 46   | 21.6  |
| IPR001965 | 167 | 3189 0 0      | 0 0   | 78 38   | 11 2  | 42 15  | 109 70  | 37.65 |
| IPR001810 | 171 | 5539 8 3      | 0 0   | 99 78   | 1 1   | 46 30  | 69 51   | 10.98 |
| IPR002290 | 173 | 8988 17 13    | 0 0   | 74 54   | 14 3  | 31 14  | 75 51   | 34.09 |
| IPR001478 | 174 | 8046 53 45    | 2 0   | 17 11   | 7 6   | 3 2    | 114 108 | 23.07 |
| IPR002182 | 176 | 3803 49 35    | 7 1   | 141 135 | 0 0   | 20 7   | 7 3     | 17.11 |
| IPR000421 | 190 | 1503 128 116  | 0 0   | 9 5     | 3 0   | 7 3    | 63 53   | 8.68  |
| IPR018249 | 190 | 4035 53 34    | 12 10 | 63 35   | 15 3  | 18 4   | 108 75  | 10.68 |
| IPR000182 | 195 | 19047 151 134 | 14 5  | 23 15   | 2 0   | 28 19  | 11 5    | 18.96 |
| IPR013103 | 196 | 3713 0 0      | 0 0   | 194 188 | 0 0   | 11 6   | 6 3     | 13.01 |
| IPR001789 | 201 | 33894 167 129 | 28 8  | 37 14   | 0 0   | 22 9   | 14 4    | 18.02 |
| IPR002885 | 201 | 38172 9 6     | 0 0   | 180 176 | 0 0   | 16 11  | 9 7     | NA    |
| IPR003594 | 203 | 28089 163 117 | 37 4  | 51 22   | 5 1   | 26 9   | 11 3    | 30.49 |
| IPR007087 | 222 | 25777 0 0     | 2 1   | 47 28   | 6 2   | 49 25  | 211 183 | 36.72 |
| IPR001611 | 234 | 25766 48 34   | 2 0   | 111 96  | 5 3   | 17 8   | 97 72   | 39.85 |
| IPR013026 | 234 | 4557 170 141  | 17 4  | 39 15   | 14 4  | 34 18  | 46 16   | 1.73  |
| IPR000504 | 235 | 14776 0 0     | 0 0   | 109 71  | 19 1  | 60 31  | 133 97  | 25.37 |
| IPR001440 | 236 | 5455 144 121  | 23 10 | 45 20   | 9 0   | 39 15  | 55 29   | 13.07 |
| IPR001680 | 241 | 29750 42 26   | 3 0   | 88 35   | 30 7  | 94 39  | 125 62  | NA    |
| IPR001584 | 242 | 10405 57 52   | 0 0   | 166 149 | 0 0   | 21 8   | 34 25   | 5.82  |
| IPR000477 | 254 | 5890 10 7     | 1 0   | 225 208 | 1 0   | 20 8   | 37 26   | 9.85  |
| IPR014001 | 262 | 16155 90 53   | 32 4  | 113 51  | 27 2  | 74 29  | 95 36   | 30.21 |
| IPR001841 | 268 | 6678 0 0      | 0 0   | 117 74  | 23 8  | 57 19  | 162 113 | 46.87 |
| IPR002110 | 273 | 32858 43 30   | 1 0   | 79 45   | 14 7  | 75 43  | 133 95  | 24.88 |
| IPR001650 | 274 | 16267 95 54   | 31 3  | 115 51  | 28 2  | 80 34  | 102 39  | 25.65 |
| IPR019734 | 277 | 16400 193 160 | 29 10 | 54 23   | 14 1  | 38 8   | 58 24   | NA    |
| IPR019781 | 296 | 21060 50 30   | 7 2   | 107 46  | 37 10 | 115 51 | 140 68  | NA    |
| IPR003961 | 315 | 11214 197 167 | 18 5  | 2 2     | 0 0   | 5 2    | 144 127 | 25.85 |
| IPR017442 | 444 | 16048 133 92  | 19 4  | 191 145 | 12 5  | 86 46  | 125 74  | 25.84 |
| IPR003593 | 450 | 91796 276 195 | 58 8  | 153 82  | 41 1  | 88 30  | 81 25   | NA    |

NA: No average sequence similarity computed due to large family sizes
