# Supplementary material for: Tethering preferences of domain families co-occurring in multi-domain proteins
Source: Royal Society of Chemistry journal article supplement (doi:10.1039/c3mb25481j), 2013-03-07
Supplement: c3mb25481j_2.pdf [file c3mb25481j_2.pdf]

**Supplementary Table ST2 Examples of domain families showing high tethering number.** Tethering number of a domain family is defined as the number of unique family associations made by the domain family in the chosen dataset of multi-domain proteins.

| S.No. | Domain family (Interpro ID) | Tethering number | Brief description of the functions of the domain family                                                                                                                                                                                                                                                                                                                                     |
|-------|-----------------------------|------------------|---------------------------------------------------------------------------------------------------------------------------------------------------------------------------------------------------------------------------------------------------------------------------------------------------------------------------------------------------------------------------------------------|
| 1     | IPR003593                   | 450              | AAA ATPase, a large family of proteins. Members belong to P-loop NTPases superfamily, and are involved in binding to ATP and bringing about energy dependent unfolding of macromolecules.                                                                                                                                                                                                   |
| 2     | IPR017442                   | 444              | Protein kinase domain, involved in transferring the $\gamma$ phosphate from ATP to one or more amino acids                                                                                                                                                                                                                                                                                  |
| 3     | IPR003961                   | 315              | Fibronectin, are glycoproteins which mediate binding to variety of substrates such as heparin, collagen, DNA, fibronectin receptors on cell surfaces.                                                                                                                                                                                                                                       |
| 4     | IPR019781                   | 296              | WD domain, 40 amino acid repeats is involved in variety of functions, they exist as repeats and act as protein-protein interaction modules.                                                                                                                                                                                                                                                 |
| 5     | IPR019734                   | 277              | Tetratricopeptide repeats, contains a minimum of 34 amino acids and occur as repeats. They self-associate via "knobs and holes" mechanism and are largely involved in mediating protein-protein interactions                                                                                                                                                                                |
| 6     | IPR001650                   | 274              | DNA/RNA helicase, C-terminal region is the integral part of variety of helicases and helicases related family, utilizing ATP to unwind DNA                                                                                                                                                                                                                                                  |
| 7     | IPR002110                   | 273              | Ankyrin repeats, they exist as tandem repeats. They act as the most common protein interaction motif and are involved in diverse functions                                                                                                                                                                                                                                                  |
| 8     | IPR001841                   | 268              | Zinc finger Ring types, members belonging to this family are specialized type of zinc finger of 40-60 amino acids and are probably involved in mediating protein-protein interactions. There also exist two variants namely C3HC4-type and C3H2C3-type. RING domain has been implicated in many biological processes E3 ubiquitin ligase activity is intrinsic to the RING domain of c-Cbl. |
| 9     | IPR014001                   | 262              | DEAD like helicase N-terminal, it is found in proteins such as DEAD and DEAH helicases                                                                                                                                                                                                                                                                                                      |
| 10    | IPR000477                   | 254              | Reverse transcriptase, members include RNA dependent DNA polymerase and retroelements                                                                                                                                                                                                                                                                                                       |
| 11    | IPR001584                   | 242              | Integrase catalytic core, members act as endonuclease. This domain is found in Transposase and reverse transcriptase genes.                                                                                                                                                                                                                                                                 |
| 12    | IPR000504                   | 235              | RNA recognition motif, RNP-1 consensus motif is present in RRM proteins that have a variety of RNA binding preference and function. This includes hnRNPs, component of small nuclear ribonuclear protein and proteins regulating RNA stability and translation.                                                                                                                             |

|    |           |     |                                                                                                                                                                                                                       |
|----|-----------|-----|-----------------------------------------------------------------------------------------------------------------------------------------------------------------------------------------------------------------------|
| 13 | IPR001611 | 234 | Leucine-rich repeats, members of this family are involved in mediating protein interactions                                                                                                                           |
| 14 | IPR007087 | 222 | Zinc finger C2H2 type , members of this family are involved in binding to DNA, RNA and proteins.                                                                                                                      |
| 15 | IPR003594 | 203 | Histidine kinase- DNA gyrase B- phytochrome-like ATPases domain. Found in several ATP binding proteins like Histidine kinases and topoisomerases                                                                      |
| 16 | IPR002885 | 201 | Pentatricopeptide repeats (PPR) are tandem repeats of a degenerate 35 amino acid motif. They may have some role to play in post-transcriptional process and are thought to be sequence specific RNA binding proteins. |
| 17 | IPR001789 | 201 | Receives signals from the sensor partner in bacterial two component system. Found in the N-terminal region of the DNA binding effector.                                                                               |
| 18 | IPR000182 | 195 | GCN5-related N-acetyltransferase , histone acetyltransferase. Involved in regulation of cell growth and development. Particularly important in transcription and DNA repair.                                          |
| 19 | IPR018249 | 190 | EF hand 2 , members of the family involved in calcium binding.                                                                                                                                                        |
| 20 | IPR000421 | 190 | Coagulation factor 5/8 type , the C-terminal domain. The domain is found in extracellular and membrane proteins, carbohydrate binding proteins and phosphatidyl serine binding proteins.                              |
