# Supplementary material for: Tethering preferences of domain families co-occurring in multi-domain proteins
Source: Royal Society of Chemistry journal article supplement (doi:10.1039/c3mb25481j), 2013-03-07
Supplement: c3mb25481j_4.pdf [file c3mb25481j_4.pdf]

**Table S4** Ubiquitous domain families with their tethering numbers and fraction of eukaryotes, bacteria and archae containing the domain families  
 fraction = Number of organisms in a kingdom containing the co-occurring domain family/total number of organisms in the respective kingdom

| Tethering number | fraction of | fraction of | fraction of | Archaea |
|------------------|-------------|-------------|-------------|---------|
| IPR003593        | 446         | 0.74        | 0.95        | 0.92    |
| IPR017442        | 445         | 0.7         | 0.61        | 0.69    |
| IPR019734        | 280         | 0.64        | 0.75        | 0.67    |
| IPR001650        | 272         | 0.67        | 0.95        | 0.9     |
| IPR014001        | 264         | 0.68        | 0.95        | 0.9     |
| IPR001440        | 236         | 0.64        | 0.7         | 0.61    |
| IPR003594        | 204         | 0.67        | 0.93        | 0.9     |
| IPR000182        | 198         | 0.63        | 0.92        | 0.9     |
| IPR001478        | 182         | 0.58        | 0.92        | 0.59    |
| IPR002035        | 169         | 0.61        | 0.71        | 0.71    |
| IPR011701        | 167         | 0.67        | 0.94        | 0.9     |
| IPR001387        | 153         | 0.55        | 0.89        | 0.9     |
| IPR002198        | 152         | 0.66        | 0.93        | 0.73    |
| IPR005135        | 147         | 0.58        | 0.87        | 0.53    |
| IPR013216        | 143         | 0.61        | 0.9         | 0.88    |
| IPR000873        | 142         | 0.62        | 0.87        | 0.78    |
| IPR001254        | 137         | 0.57        | 0.92        | 0.57    |
| IPR013027        | 134         | 0.61        | 0.95        | 0.92    |
| IPR000073        | 125         | 0.65        | 0.88        | 0.61    |
| IPR005834        | 116         | 0.66        | 0.94        | 0.9     |
| IPR000209        | 115         | 0.61        | 0.59        | 0.67    |
| IPR001450        | 113         | 0.58        | 0.85        | 0.92    |
| IPR004843        | 112         | 0.63        | 0.92        | 0.9     |
| IPR001173        | 107         | 0.63        | 0.9         | 0.9     |
| IPR000644        | 93          | 0.61        | 0.94        | 0.9     |
| IPR001763        | 91          | 0.6         | 0.89        | 0.69    |
| IPR001296        | 88          | 0.6         | 0.9         | 0.9     |
| IPR006076        | 84          | 0.59        | 0.87        | 0.69    |
| IPR000086        | 81          | 0.61        | 0.91        | 0.88    |
| IPR013766        | 81          | 0.64        | 0.93        | 0.76    |
| IPR003607        | 73          | 0.59        | 0.92        | 0.9     |
| IPR003439        | 68          | 0.61        | 0.93        | 0.82    |
| IPR000795        | 67          | 0.64        | 0.95        | 0.9     |
| IPR001279        | 66          | 0.58        | 0.94        | 0.9     |
| IPR013149        | 66          | 0.6         | 0.83        | 0.69    |
| IPR001509        | 64          | 0.59        | 0.9         | 0.88    |
| IPR002938        | 63          | 0.55        | 0.69        | 0.73    |
| IPR000449        | 61          | 0.56        | 0.93        | 0.73    |
| IPR001433        | 59          | 0.64        | 0.81        | 0.57    |
| IPR006094        | 59          | 0.52        | 0.91        | 0.59    |
| IPR004365        | 58          | 0.58        | 0.95        | 0.9     |
| IPR004087        | 56          | 0.65        | 0.94        | 0.88    |
| IPR013154        | 56          | 0.6         | 0.83        | 0.67    |
| IPR004839        | 55          | 0.63        | 0.93        | 0.9     |
| IPR006680        | 55          | 0.54        | 0.91        | 0.9     |
| IPR003953        | 54          | 0.53        | 0.87        | 0.84    |
| SM00316          | 54          | 0.59        | 0.95        | 0.9     |
| IPR001041        | 53          | 0.58        | 0.81        | 0.75    |
| IPR008333        | 51          | 0.55        | 0.76        | 0.53    |
| IPR002937        | 50          | 0.57        | 0.62        | 0.63    |
