# Supplementary material for: Tethering preferences of domain families co-occurring in multi-domain proteins
Source: Royal Society of Chemistry journal article supplement (doi:10.1039/c3mb25481j), 2013-03-07
Supplement: c3mb25481j_5.pdf [file c3mb25481j_5.pdf]

Average number of protein members contain a domain family in an organism. The table includes the average values estimated in Eukaryotes (second column), Bacteria (third column) Achaea (fourth column) and in the full dataset (fifth column). Last Column includes tethering number of domain families

**Table S15**

| Domain family na | Eukaryote | Bacteria | Achaea | In all the organisms | Tethering number |
|------------------|-----------|----------|--------|----------------------|------------------|
| IPR003593        | 101.54    | 114.05   | 102.65 | 57.55                | 450              |
| IPR017442        | 26.14     | 137.66   | 6.75   | 2.69                 | 444              |
| IPR003961        | 27.49     | 119.2    | 5.28   | 9.06                 | 315              |
| IPR019781        | 77.71     | 220.48   | 5.65   | 3                    | 296              |
| IPR019734        | 22.87     | 64.76    | 16.82  | 26.06                | 277              |
| IPR001650        | 18.32     | 71.28    | 12.57  | 9.93                 | 274              |
| IPR002110        | 70.97     | 333.22   | 8.57   | 8                    | 273              |
| IPR001841        | 68.85     | 74.12    | 1      | 0                    | 268              |
| IPR014001        | 18.19     | 66.69    | 12.81  | 11.26                | 262              |
| IPR000477        | 15.03     | 63.71    | 2.54   | 2.75                 | 254              |
| IPR001584        | 16.36     | 84.79    | 9.14   | 2                    | 242              |
| IPR001680        | 120.93    | 285.35   | 22.67  | 30                   | 241              |
| IPR001440        | 8.17      | 27.62    | 5.31   | 6.35                 | 236              |
| IPR000504        | 53.15     | 159.73   | 2.12   | 2.5                  | 235              |
| IPR013026        | 6.17      | 11.12    | 5.72   | 2.23                 | 234              |
| IPR001611        | 87.05     | 273.58   | 6.78   | 20                   | 234              |
| IPR007087        | 213.03    | 270.95   | 1      | 1.55                 | 222              |
| IPR003594        | 32.03     | 14.55    | 35.28  | 13                   | 203              |
| IPR002885        | 428.9     | 560.97   | 1.24   | 0                    | 201              |
| IPR001789        | 41.18     | 14.16    | 44.31  | 16.17                | 201              |
| IPR013103        | 112.52    | 112.52   | 0      | 0                    | 196              |
| IPR000182        | 22.15     | 24.12    | 22.71  | 9.72                 | 195              |
| IPR018249        | 13.77     | 37.65    | 2.82   | 9.33                 | 190              |
| IPR000421        | 6.19      | 14.32    | 3.92   | 0                    | 190              |
| IPR002182        | 25.19     | 67.62    | 4.27   | 1.33                 | 176              |
| IPR001478        | 9.64      | 53.04    | 5.39   | 1.27                 | 174              |
| IPR002290        | 36.24     | 91.62    | 1.26   | 0                    | 173              |
| IPR001810        | 65.94     | 72.43    | 4.25   | 0                    | 171              |
| IPR001965        | 37.96     | 37.96    | 0      | 0                    | 167              |
| IPR001245        | 31.05     | 58.29    | 1.04   | 1                    | 167              |
| IPR002035        | 5.55      | 20.51    | 3.6    | 2.44                 | 166              |
| IPR011701        | 34        | 80.33    | 29.69  | 15                   | 164              |
| IPR013105        | 3.56      | 6.34     | 3.19   | 2.83                 | 159              |
| IPR001878        | 51.43     | 51.43    | 0      | 0                    | 155              |
| IPR001849        | 46.47     | 49.64    | 1      | 1                    | 155              |
| IPR002198        | 26.59     | 57.48    | 23.96  | 6.22                 | 153              |
| IPR022409        | 6.28      | 5.97     | 3.16   | 36.94                | 152              |
| IPR001119        | 23.07     | 6.67     | 23.99  | 0                    | 148              |
| IPR001387        | 13.3      | 1.63     | 14.96  | 6.43                 | 147              |
| IPR013216        | 11.74     | 18.36    | 11.15  | 9.44                 | 147              |
| IPR005135        | 4.65      | 16.29    | 3.48   | 1.22                 | 144              |
| IPR000595        | 7.46      | 18.49    | 6.09   | 1                    | 143              |
| IPR000873        | 17.37     | 39.18    | 15.27  | 9.1                  | 143              |
| IPR000048        | 27.9      | 43.23    | 1.08   | 0                    | 142              |
| IPR001254        | 9.25      | 69.15    | 3.42   | 1.24                 | 137              |
| IPR003598        | 179.48    | 196.19   | 4      | 0                    | 135              |
| IPR000014        | 15.8      | 12.17    | 15.55  | 39.82                | 134              |
| IPR003599        | 87.23     | 118.07   | 2.93   | 0                    | 132              |
| IPR003661        | 22.32     | 9.66     | 23.51  | 9.14                 | 132              |
| IPR013027        | 13.13     | 15.73    | 13.08  | 9.47                 | 130              |
| IPR017909        | 4.97      | 3.17     | 4.92   | 7.56                 | 130              |
| IPR001452        | 51.94     | 55.58    | 1      | 0                    | 127              |
| IPR000073        | 13.78     | 27.88    | 12.52  | 3.16                 | 125              |
| IPR002482        | 5.54      | 6.36     | 5.47   | 0                    | 124              |
| IPR006210        | 56.91     | 56.91    | 0      | 0                    | 123              |
| IPR003343        | 4.39      | 1.88     | 4.49   | 5.67                 | 122              |
| IPR000571        | 38.94     | 38.94    | 0      | 0                    | 120              |
| IPR000008        | 49.91     | 51.02    | 1      | 1                    | 119              |
| IPR001623        | 6.98      | 38.04    | 3.58   | 2.6                  | 119              |
| IPR005834        | 14.72     | 30.46    | 13.22  | 9.37                 | 118              |
| IPR000160        | 16.89     | 6.4      | 17.06  | 1                    | 116              |
| IPR000209        | 4.97      | 13.93    | 3.6    | 2.53                 | 116              |
| IPR000742        | 41.26     | 41.89    | 5      | 0                    | 115              |
| IPR017896        | 10        | 2.6      | 9.84   | 20.89                | 115              |

|           |        |        |       |       |     |
|-----------|--------|--------|-------|-------|-----|
| IPR001450 | 10.71  | 3.78   | 10.38 | 26.91 | 114 |
| IPR006209 | 24.26  | 24.81  | 1     | 0     | 112 |
| IPR001881 | 119.77 | 125    | 2     | 0     | 111 |
| IPR004843 | 8.75   | 17.77  | 7.79  | 7.8   | 110 |
| IPR000253 | 6.07   | 14.22  | 4.35  | 1.5   | 109 |
| IPR003018 | 9.44   | 6.1    | 9.9   | 7.19  | 108 |
| IPR000953 | 24.05  | 24.05  | 0     | 0     | 106 |
| IPR007110 | 9.93   | 16.14  | 2     | 2.5   | 105 |
| IPR005162 | 77.27  | 79.05  | 1     | 0     | 105 |
| IPR000210 | 42.3   | 42.76  | 3     | 0     | 104 |
| IPR001128 | 26.82  | 88.48  | 7.01  | 1.29  | 103 |
| IPR006163 | 8.14   | 17.18  | 7.21  | 1.33  | 103 |
| IPR000772 | 5.72   | 9.93   | 3.7   | 2     | 101 |
| IPR001173 | 11.93  | 9.25   | 12.32 | 10.7  | 100 |
| IPR019546 | 2.04   | 1      | 2.03  | 2.4   | 99  |
| IPR018957 | 9.95   | 9.95   | 0     | 0     | 95  |
| IPR001214 | 9.56   | 22.76  | 1.16  | 1     | 95  |
| IPR001763 | 7.9    | 12.71  | 7.52  | 4.63  | 94  |
| IPR000644 | 14.24  | 21.01  | 12.74 | 26.67 | 94  |
| IPR001054 | 6.46   | 14.1   | 4.45  | 4     | 94  |
| IPR001304 | 33.86  | 45.33  | 1.5   | 1     | 93  |
| IPR000357 | 7.9    | 23.54  | 2.13  | 2.6   | 93  |
| IPR013767 | 3.93   | 5.66   | 3.58  | 8.07  | 92  |
| IPR013656 | 6.58   | 1.6    | 6.57  | 13.25 | 90  |
| IPR008160 | 26.97  | 90.65  | 8.15  | 1.8   | 88  |
| PF07679   | 57.17  | 66.63  | 2     | 0     | 88  |
| IPR002909 | 7.91   | 12.61  | 3.59  | 1.5   | 87  |
| IPR000157 | 9.4    | 25.9   | 1.95  | 1     | 86  |
| IPR013111 | 27.36  | 27.36  | 0     | 0     | 86  |
| IPR001296 | 11.66  | 9.58   | 11.96 | 10.43 | 86  |
| IPR006076 | 7.93   | 12.79  | 7.52  | 5.2   | 85  |
| IPR003660 | 17.91  | 5.76   | 18.73 | 8.32  | 84  |
| IPR013217 | 3.21   | 7.05   | 2.68  | 1.86  | 84  |
| IPR018248 | 12.03  | 17.29  | 1.64  | 0     | 83  |
| IPR000884 | 53.96  | 57.51  | 3     | 0     | 83  |
| IPR001005 | 57.56  | 67.58  | 1     | 0     | 83  |
| PF05729   | 5.47   | 12.87  | 2.45  | 1.6   | 82  |
| IPR012854 | 6.57   | 0      | 6.57  | 0     | 82  |
| IPR020683 | 5.11   | 9.53   | 1.87  | 0     | 82  |
| IPR015940 | 12.86  | 13.61  | 1     | 0     | 82  |
| IPR019948 | 7.26   | 0      | 7.26  | 0     | 81  |
| IPR020635 | 29.1   | 29.1   | 0     | 0     | 81  |
| IPR013655 | 6.64   | 4.21   | 6.87  | 9.07  | 80  |
| IPR001202 | 22.74  | 22.74  | 0     | 0     | 80  |
| IPR000626 | 28.02  | 28.58  | 1     | 0     | 80  |
| IPR013766 | 6.13   | 28.69  | 3.72  | 2.72  | 80  |
| IPR002126 | 78.37  | 230    | 3.66  | 1     | 79  |
| IPR003088 | 8.58   | 1.95   | 9.63  | 1.5   | 79  |
| IPR001932 | 5.31   | 18.43  | 3.48  | 2     | 78  |
| IPR000086 | 9.38   | 13.16  | 9.31  | 3.67  | 78  |
| IPR001610 | 6.37   | 3.89   | 6.43  | 10.56 | 78  |
| IPR002477 | 3.77   | 6.31   | 3.55  | 1     | 77  |
| IPR001357 | 3.02   | 19.93  | 1.14  | 1     | 76  |
| IPR005084 | 4.36   | 1.33   | 4.44  | 7     | 76  |
| IPR000408 | 28.72  | 43.84  | 12.28 | 28    | 76  |
| IPR003959 | 2.9    | 7.75   | 1.63  | 1.37  | 75  |
| IPR008009 | 5.98   | 1.14   | 6.38  | 3.5   | 75  |
| IPR003644 | 7.39   | 13     | 5.04  | 0     | 75  |
| IPR015880 | 178.23 | 184.08 | 1     | 1     | 75  |
| IPR001138 | 103    | 103    | 0     | 0     | 75  |
| IPR001633 | 10.82  | 5.25   | 10.87 | 0     | 74  |
| IPR006652 | 19.41  | 47.82  | 3.42  | 4     | 74  |
| IPR001487 | 19.72  | 20.64  | 1     | 0     | 74  |
| IPR000601 | 3.15   | 6      | 2.84  | 3.22  | 74  |
| IPR002048 | 39.45  | 46.9   | 1.39  | 0     | 73  |
| IPR003607 | 6.08   | 6.53   | 6.21  | 3.2   | 73  |
| IPR001343 | 36.66  | 2      | 37.01 | 5     | 73  |
| IPR001258 | 8.15   | 19.02  | 4.44  | 16.78 | 71  |
| IPR001394 | 21.28  | 23.74  | 1.1   | 0     | 71  |

|           |        |        |       |       |    |
|-----------|--------|--------|-------|-------|----|
| IPR002172 | 106.22 | 108.78 | 4     | 0     | 70 |
| IPR001356 | 57.1   | 57.1   | 0     | 0     | 69 |
| IPR000449 | 1.45   | 5.62   | 1.06  | 1     | 69 |
| IPR002219 | 18.57  | 18.57  | 0     | 0     | 68 |
| IPR001279 | 7.9    | 6.99   | 7.83  | 10.52 | 68 |
| IPR013091 | 10.12  | 10.3   | 1     | 0     | 67 |
| IPR001509 | 10.9   | 18.6   | 10.4  | 5.64  | 66 |
| IPR001876 | 10.61  | 14.79  | 1     | 1     | 66 |
| IPR000980 | 25.54  | 25.54  | 0     | 0     | 66 |
| IPR001660 | 16.79  | 18.21  | 1     | 0     | 66 |
| IPR001466 | 4.42   | 4.75   | 4.43  | 1.57  | 66 |
| IPR003610 | 3.27   | 1.62   | 3.28  | 5.4   | 66 |
| IPR004089 | 16.05  | 5.6    | 16.5  | 7.78  | 65 |
| IPR000792 | 11.83  | 6.33   | 12    | 1.12  | 65 |
| PF07721   | 3.51   | 2.81   | 3.71  | 1.89  | 65 |
| IPR003439 | 6.69   | 10.4   | 6.53  | 2.52  | 65 |
| IPR011545 | 2.14   | 4.19   | 1.61  | 1     | 65 |
| IPR001919 | 4.68   | 1      | 4.83  | 2     | 65 |
| IPR001087 | 4.22   | 16.65  | 2.7   | 1.58  | 65 |
| IPR001715 | 26.03  | 26.03  | 0     | 0     | 65 |
| IPR013149 | 11.31  | 24.47  | 10.05 | 5.29  | 64 |
| IPR001683 | 14.88  | 14.88  | 0     | 0     | 64 |
| IPR003591 | 16.96  | 22.02  | 1.22  | 0     | 64 |
| IPR006665 | 5.89   | 1      | 5.9   | 0     | 64 |
| IPR001433 | 5.11   | 8.91   | 4.77  | 1.76  | 64 |
| IPR012680 | 2.46   | 3.83   | 1.55  | 1     | 64 |
| IPR001791 | 28.85  | 46.22  | 1.05  | 0     | 64 |
| IPR000795 | 8.28   | 18.4   | 7.35  | 5.11  | 63 |
| IPR007527 | 3.25   | 11.01  | 1.6   | 2.24  | 63 |
| IPR001899 | 2.41   | 1      | 2.45  | 2     | 63 |
| IPR011600 | 2.91   | 3.83   | 2.52  | 1     | 63 |
| IPR019787 | 3.88   | 3.88   | 0     | 0     | 62 |
| IPR006530 | 12.47  | 1.72   | 13.44 | 14    | 62 |
| IPR006597 | 18.61  | 25.32  | 17.46 | 1     | 61 |
| IPR002156 | 3.09   | 25.07  | 1.24  | 1.18  | 61 |
| IPR018289 | 23.95  | 43.76  | 1.77  | 2.25  | 61 |
| IPR006094 | 5.45   | 16.25  | 4.54  | 3.13  | 60 |
| IPR003646 | 3.18   | 12     | 3.15  | 0     | 60 |
| IPR002938 | 5.88   | 14.9   | 4.96  | 1.73  | 60 |
| IPR000219 | 19.51  | 20.03  | 2     | 0     | 60 |
| IPR003587 | 1.93   | 2.36   | 1.85  | 1.65  | 59 |
| IPR003653 | 9.21   | 13.11  | 1.3   | 0     | 59 |
| IPR005821 | 10.82  | 35.37  | 1.23  | 1.2   | 59 |
| IPR002509 | 3.64   | 3.91   | 3.65  | 1.83  | 59 |
| IPR000910 | 19.01  | 19.01  | 0     | 0     | 59 |
| IPR005877 | 7.79   | 0      | 7.79  | 0     | 58 |
| IPR007219 | 77.94  | 77.94  | 0     | 0     | 58 |
| IPR003305 | 3.4    | 6.77   | 2.92  | 0     | 58 |
| IPR000315 | 18.34  | 25.24  | 1.11  | 1     | 58 |
| IPR008906 | 14.67  | 14.67  | 0     | 0     | 57 |
| IPR000859 | 50.64  | 54.27  | 1     | 0     | 57 |
| IPR002479 | 51.74  | 0      | 51.74 | 0     | 57 |
| IPR004839 | 11.48  | 16.96  | 11.19 | 6.28  | 57 |
| IPR009056 | 3.99   | 1.2    | 4.08  | 1     | 57 |
| IPR001638 | 8.57   | 7      | 8.88  | 2.44  | 57 |
| IPR006584 | 4.68   | 1      | 4.1   | 21.5  | 57 |
| IPR001092 | 38.28  | 40.01  | 1     | 0     | 57 |
| IPR013247 | 2.27   | 3.5    | 2.25  | 0     | 57 |
| IPR004365 | 5.77   | 8.84   | 5.46  | 5.78  | 57 |
| IPR007280 | 3.02   | 1.33   | 3.13  | 1.29  | 57 |
| IPR004087 | 5.69   | 34.5   | 2.51  | 3.6   | 56 |
| IPR007253 | 24.65  | 0      | 32.26 | 2.75  | 56 |
| IPR018392 | 2.43   | 6.67   | 1.82  | 0     | 56 |
| IPR000306 | 11.12  | 11.12  | 0     | 0     | 56 |
| IPR001752 | 21.98  | 21.98  | 0     | 0     | 56 |
| IPR000225 | 35.03  | 43.59  | 2     | 0     | 56 |
| IPR013154 | 10.67  | 21.77  | 9.55  | 6.47  | 56 |
| SM00316   | 10.1   | 10.35  | 10.45 | 3.87  | 55 |
| PTHR23083 | 2.62   | 4.05   | 2.53  | 1.14  | 55 |

|           |        |        |       |       |    |
|-----------|--------|--------|-------|-------|----|
| IPR003953 | 4      | 3.76   | 4.13  | 2.3   | 55 |
| IPR006680 | 5.99   | 6.86   | 5.98  | 4.74  | 55 |
| IPR008333 | 4.19   | 5.6    | 4.13  | 1.78  | 55 |
| IPR006674 | 2.6    | 1.65   | 2.72  | 1.63  | 55 |
| IPR008207 | 4.97   | 2.74   | 5.28  | 1.21  | 54 |
| IPR002049 | 76.21  | 78.48  | 1     | 0     | 54 |
| IPR014030 | 3.52   | 6.87   | 3.21  | 1     | 54 |
| IPR003034 | 6.29   | 8.38   | 1.1   | 0     | 54 |
| IPR012934 | 94.42  | 94.42  | 0     | 0     | 54 |
| IPR000436 | 86.22  | 86.22  | 0     | 0     | 54 |
| IPR001041 | 6.78   | 5.96   | 7.12  | 2.79  | 54 |
| IPR003586 | 1.9    | 2.42   | 1.67  | 1.78  | 53 |
| IPR006055 | 3.2    | 6.43   | 2.87  | 1     | 53 |
| IPR007197 | 7.24   | 2.41   | 7.3   | 12.09 | 53 |
| IPR000276 | 154.58 | 154.58 | 0     | 0     | 53 |
| IPR011635 | 4.06   | 0      | 3.97  | 4.32  | 53 |
| IPR014031 | 3.32   | 6.56   | 3.01  | 0     | 53 |
| IPR011031 | 4.18   | 1      | 4.32  | 2.75  | 53 |
| IPR000330 | 2.49   | 4.29   | 1.29  | 1     | 52 |
| IPR017941 | 5.01   | 5.05   | 5.01  | 4.96  | 52 |
| IPR013017 | 4.08   | 6.59   | 3.32  | 2.25  | 52 |
| IPR013517 | 5.65   | 2.88   | 6.74  | 3     | 52 |
| IPR008454 | 9.44   | 1.86   | 10.18 | 2.9   | 52 |
| IPR016047 | 4.51   | 2      | 4.61  | 1     | 51 |
| IPR011659 | 6.5    | 4.55   | 6.84  | 2.7   | 51 |
| IPR001242 | 11.7   | 21.42  | 10.73 | 1     | 51 |
| IPR002860 | 9.96   | 10.19  | 9.95  | 7     | 51 |
| IPR002912 | 8.45   | 10.13  | 8.48  | 5.46  | 51 |
| IPR002575 | 5.28   | 13.52  | 4.48  | 1.65  | 51 |
| IPR000433 | 8      | 8      | 0     | 0     | 51 |
| PF07691   | 1.82   | 3      | 1.57  | 0     | 50 |
| IPR013069 | 8.31   | 8.32   | 8     | 0     | 50 |
| IPR020842 | 4.82   | 5.52   | 4.63  | 0     | 50 |
| IPR018242 | 49.8   | 0      | 49.8  | 0     | 49 |
| IPR001609 | 11.23  | 11.23  | 0     | 0     | 49 |
| IPR000082 | 9.68   | 10.28  | 1     | 0     | 49 |
| IPR002181 | 23.03  | 25     | 2.67  | 0     | 49 |
| IPR001007 | 23.46  | 24.12  | 1     | 0     | 49 |
| IPR002917 | 8.87   | 13.84  | 8.57  | 4.76  | 49 |
| IPR000757 | 4.42   | 10.5   | 2.09  | 1     | 49 |
| IPR002937 | 4.32   | 9.49   | 3.68  | 2.12  | 49 |
| IPR001867 | 13.05  | 4.25   | 13.1  | 0     | 48 |
| IPR018060 | 16.06  | 6.6    | 16.19 | 1     | 48 |
| IPR003903 | 8.88   | 8.88   | 0     | 0     | 48 |
| IPR011658 | 1.93   | 1.85   | 2.02  | 1     | 48 |
| PD936484  | 1.43   | 1.67   | 1.27  | 1     | 48 |
| IPR000203 | 10.47  | 10.47  | 0     | 0     | 48 |
| IPR008258 | 4.17   | 1.78   | 4.26  | 0     | 48 |
| IPR004332 | 35.74  | 35.74  | 0     | 0     | 47 |
| IPR000159 | 10.92  | 10.92  | 0     | 0     | 47 |
| IPR006935 | 1.91   | 4.15   | 1.49  | 1.58  | 47 |
| IPR000832 | 19     | 19     | 0     | 0     | 47 |
| IPR005471 | 5.98   | 1.5    | 6.27  | 2.89  | 47 |
| IPR019557 | 131.17 | 131.17 | 0     | 0     | 47 |
| IPR003410 | 4.18   | 5.83   | 2.94  | 0     | 47 |
| IPR002893 | 10.97  | 11.1   | 1     | 0     | 47 |
| IPR011583 | 4.26   | 9.43   | 1.9   | 2     | 47 |
| IPR000845 | 3.23   | 6.97   | 2.9   | 2.13  | 47 |
| IPR008250 | 6.53   | 20.66  | 4.97  | 3.58  | 47 |
| IPR003613 | 10.84  | 11.09  | 4.33  | 0     | 46 |
| IPR002197 | 9.17   | 2.67   | 9.2   | 0     | 46 |
| IPR006638 | 9.14   | 4.84   | 9.45  | 11.37 | 45 |
| IPR001753 | 8.78   | 12.24  | 8.49  | 4.82  | 45 |
| IPR005828 | 11.35  | 42.06  | 5.58  | 5.32  | 45 |
| IPR002645 | 4.72   | 5.72   | 4.65  | 2.31  | 45 |
| PF00326   | 3.86   | 6.94   | 3.53  | 1.91  | 45 |
| IPR017448 | 32.09  | 32.09  | 0     | 0     | 45 |
| IPR021720 | 9.39   | 15.12  | 2.65  | 1     | 44 |
| IPR001764 | 2.82   | 10.36  | 2.32  | 1.64  | 44 |

|           |        |        |       |      |    |
|-----------|--------|--------|-------|------|----|
| IPR001845 | 5.99   | 3      | 5.86  | 7.93 | 44 |
| IPR001759 | 5.07   | 6.32   | 1.17  | 1    | 44 |
| IPR006016 | 7.25   | 11.9   | 6.94  | 7.46 | 44 |
| IPR011098 | 3.25   | 0      | 3.25  | 0    | 44 |
| IPR001646 | 9.27   | 6.65   | 9.58  | 6.8  | 44 |
| IPR004875 | 14.11  | 18.65  | 2.62  | 1.5  | 44 |
| IPR018108 | 103.85 | 106.31 | 1.5   | 0    | 44 |
| IPR020841 | 7.78   | 5.75   | 8.24  | 0    | 44 |
| IPR008254 | 3      | 4.68   | 2.79  | 2.46 | 44 |
| IPR001828 | 6.49   | 22.54  | 4.83  | 2.73 | 43 |
| IPR000668 | 8.93   | 18.68  | 1.29  | 1.88 | 43 |
| IPR003877 | 6.75   | 7.11   | 1     | 0    | 43 |
| IPR002044 | 2.65   | 4.31   | 1.3   | 1    | 43 |
| IPR003344 | 8.46   | 0      | 8.74  | 5.2  | 43 |
| IPR000863 | 5.5    | 17     | 2.68  | 1    | 43 |
| IPR013096 | 6.2    | 5.16   | 6.44  | 3.75 | 43 |
| IPR007627 | 10.62  | 7.9    | 10.66 | 0    | 43 |
| IPR020801 | 5.67   | 9.96   | 4.92  | 0    | 43 |
| IPR020806 | 9.18   | 3.81   | 9.84  | 0    | 43 |
| IPR011490 | 17.18  | 0      | 17.18 | 0    | 43 |
| IPR006154 | 3.54   | 2.16   | 3.69  | 3.09 | 43 |
| IPR000198 | 17.56  | 18.64  | 1     | 0    | 43 |
| PF07859   | 4.96   | 14.21  | 3.66  | 2.06 | 43 |
| IPR005814 | 5.72   | 6.91   | 5.77  | 3.17 | 43 |
| IPR018355 | 8.86   | 8.97   | 1     | 0    | 43 |
| IPR013242 | 41.14  | 47.83  | 1     | 0    | 43 |
| IPR000467 | 9.97   | 9.97   | 0     | 0    | 42 |
| IPR011712 | 4.33   | 2      | 4.34  | 0    | 42 |
| IPR013229 | 4.2    | 1      | 3.56  | 9.2  | 42 |
| IPR000551 | 6.15   | 4      | 6.21  | 3.87 | 42 |
| IPR002109 | 3.36   | 9.59   | 2.64  | 2.5  | 42 |
| PF08279   | 3.22   | 3      | 3.31  | 2.02 | 42 |
| IPR000700 | 1.85   | 1      | 1.8   | 2.62 | 42 |
| IPR000195 | 19.96  | 19.96  | 0     | 0    | 42 |
| IPR003616 | 3.74   | 5.92   | 1.11  | 1    | 42 |
| IPR001223 | 2.77   | 5.88   | 1.52  | 1.33 | 42 |
| IPR007502 | 3      | 10.8   | 1.44  | 0    | 42 |
| IPR006104 | 2.75   | 3.22   | 2.69  | 1.44 | 42 |
| IPR009875 | 3.93   | 2      | 3.94  | 0    | 41 |
| IPR006644 | 5.04   | 3      | 6.5   | 1    | 41 |
| IPR000866 | 4.48   | 6.67   | 4.3   | 3.23 | 41 |
| IPR011123 | 4.73   | 1      | 4.96  | 1.5  | 41 |
| IPR000569 | 9.93   | 10.88  | 1     | 0    | 41 |
| IPR012312 | 4.38   | 7.88   | 4.23  | 3.13 | 41 |
| IPR001781 | 44.29  | 45.83  | 1     | 1    | 41 |
| IPR002557 | 86.41  | 98.92  | 2.8   | 4    | 41 |
| IPR007730 | 3.08   | 1      | 3.09  | 0    | 41 |
| IPR011080 | 2.53   | 0      | 2.53  | 0    | 41 |
| IPR000998 | 15.22  | 18.9   | 1.88  | 0    | 41 |
| IPR000991 | 5.95   | 7.56   | 5.81  | 5.74 | 41 |
| IPR002931 | 2.92   | 3.22   | 2.95  | 1.84 | 41 |
| IPR004242 | 62.42  | 62.42  | 0     | 0    | 41 |
| IPR000313 | 7.42   | 7.42   | 0     | 0    | 41 |
| IPR001199 | 9.71   | 14.49  | 1.4   | 1.67 | 40 |
| IPR002130 | 3.38   | 14.17  | 2.01  | 1.26 | 40 |
| IPR000909 | 3.68   | 5.76   | 1.77  | 0    | 40 |
| IPR013658 | 2.35   | 2.53   | 2.35  | 1.5  | 40 |
| IPR001895 | 10.01  | 10.73  | 1     | 0    | 40 |
| IPR005158 | 3.22   | 1      | 3.37  | 1    | 40 |
| IPR013378 | 9.1    | 0      | 9.1   | 0    | 40 |
| IPR011709 | 2.98   | 10.42  | 1.02  | 0    | 40 |
| IPR003014 | 6      | 8.38   | 1.25  | 0    | 40 |
| IPR011498 | 7.36   | 8.25   | 1.67  | 1.4  | 40 |
| IPR002772 | 2.94   | 8.54   | 2.24  | 1.6  | 40 |
| IPR002999 | 3.76   | 3.76   | 0     | 0    | 40 |
| IPR006047 | 4.43   | 5.57   | 4.35  | 2.06 | 40 |
| IPR017868 | 2.49   | 3.58   | 1.11  | 1.67 | 40 |
| IPR013753 | 11.12  | 14.95  | 1.29  | 2.6  | 40 |
| IPR005546 | 4.91   | 3      | 4.92  | 0    | 39 |

|           |        |        |       |       |    |
|-----------|--------|--------|-------|-------|----|
| IPR000270 | 7.12   | 7.12   | 0     | 0     | 39 |
| IPR001024 | 8.14   | 9.85   | 1     | 1     | 39 |
| IPR002889 | 3.96   | 3.96   | 0     | 0     | 39 |
| IPR002223 | 33.54  | 38.29  | 1.2   | 0     | 39 |
| IPR002831 | 3.03   | 1      | 1.58  | 7.93  | 39 |
| IPR000524 | 13.7   | 3.33   | 14.06 | 1.56  | 39 |
| IPR000445 | 1.71   | 1.76   | 1.72  | 1.33  | 39 |
| IPR013078 | 5.02   | 10.73  | 4.5   | 1.44  | 39 |
| IPR001507 | 17.97  | 17.97  | 0     | 0     | 38 |
| IPR010259 | 5.38   | 13.26  | 2.1   | 2     | 38 |
| IPR000089 | 5.85   | 8.16   | 5.85  | 1.63  | 38 |
| IPR001031 | 3.19   | 3.32   | 3.17  | 0     | 38 |
| IPR018453 | 17     | 17     | 0     | 0     | 38 |
| IPR001547 | 3.66   | 9.1    | 2.33  | 4.5   | 38 |
| IPR004046 | 8.53   | 20.48  | 6.17  | 1.17  | 38 |
| IPR002123 | 4.19   | 9.77   | 3.6   | 1     | 38 |
| IPR000515 | 35.96  | 4.78   | 37.48 | 17.43 | 38 |
| IPR001159 | 2.47   | 17.23  | 1.06  | 1     | 38 |
| IPR000608 | 25.45  | 26.05  | 1     | 0     | 38 |
| IPR018337 | 20.58  | 0      | 20.58 | 0     | 38 |
| IPR000212 | 3.92   | 2.5    | 4.06  | 2.5   | 38 |
| IPR013221 | 5.65   | 2.48   | 5.97  | 1.89  | 37 |
| IPR004039 | 2.14   | 2.92   | 2.02  | 3.82  | 37 |
| IPR003347 | 3.75   | 10.35  | 1.43  | 0     | 37 |
| PF01637   | 2.17   | 1.37   | 1.75  | 4.53  | 37 |
| IPR001140 | 10.4   | 34.83  | 7.83  | 1.82  | 37 |
| IPR000483 | 27.14  | 27.14  | 0     | 0     | 37 |
| IPR004010 | 3.88   | 3.2    | 3.96  | 2.88  | 37 |
| IPR000679 | 11.44  | 11.58  | 1     | 0     | 37 |
| IPR014043 | 1.73   | 3.25   | 1.59  | 0     | 37 |
| PF05368   | 4.17   | 11.58  | 3.09  | 1.57  | 37 |
| IPR000878 | 4.06   | 1.79   | 4.22  | 5.07  | 37 |
| IPR013210 | 169.57 | 182.54 | 1     | 0     | 37 |
| IPR004155 | 4.73   | 3.65   | 4.55  | 8.73  | 37 |
| IPR006612 | 23.17  | 23.96  | 1     | 0     | 36 |
| IPR002350 | 15.67  | 18.02  | 3     | 3     | 36 |
| IPR006059 | 10.01  | 2.9    | 10.45 | 4.57  | 36 |
| PF07995   | 1.7    | 2.2    | 1.69  | 1.36  | 36 |
| IPR006970 | 2      | 2.44   | 1.38  | 1     | 36 |
| IPR013120 | 3.92   | 10.42  | 1.64  | 1     | 36 |
| IPR001846 | 11.68  | 13.48  | 1.2   | 0     | 36 |
| IPR001025 | 7.32   | 7.32   | 0     | 0     | 36 |
| IPR000961 | 15.99  | 16.16  | 1     | 0     | 36 |
| IPR000326 | 3.67   | 8.4    | 3.22  | 1.44  | 36 |
| IPR001647 | 18.92  | 4      | 19.74 | 2.76  | 36 |
| IPR001926 | 6.84   | 9.08   | 6.69  | 5.41  | 36 |
| IPR006710 | 4.64   | 6.07   | 4.36  | 4     | 36 |
| IPR004161 | 8.2    | 14.99  | 7.65  | 4.7   | 35 |
| IPR011611 | 5.35   | 7.87   | 5.27  | 2.48  | 35 |
| IPR013222 | 2.1    | 1      | 2.13  | 0     | 35 |
| IPR000591 | 6.61   | 7.23   | 1.25  | 0     | 35 |
| IPR000242 | 9.36   | 13.81  | 1.03  | 1     | 35 |
| IPR013525 | 6.39   | 20.19  | 4.92  | 4.21  | 35 |
| IPR021129 | 4.06   | 4.14   | 1     | 0     | 35 |
| PF00753   | 2.57   | 3.61   | 2.42  | 2.96  | 35 |
| IPR007021 | 28.82  | 28.82  | 0     | 0     | 35 |
| IPR013126 | 3.99   | 16.31  | 2.6   | 1.25  | 35 |
| IPR007848 | 3.03   | 3.52   | 3.04  | 2.26  | 35 |
| IPR010496 | 3.69   | 1.5    | 3.82  | 0     | 35 |
| IPR005532 | 2.61   | 1.84   | 2.71  | 2.5   | 35 |
| IPR002083 | 14.1   | 14.1   | 0     | 0     | 35 |
| IPR003029 | 1.59   | 2.25   | 1.45  | 1     | 35 |
| IPR002178 | 3.76   | 1.5    | 3.8   | 0     | 35 |
| IPR000727 | 11.67  | 14.11  | 1     | 1     | 35 |
| IPR000683 | 5.53   | 5.17   | 5.71  | 3.14  | 35 |
| IPR018111 | 1.74   | 3.7    | 1.11  | 1.45  | 35 |
| IPR012910 | 17.42  | 6      | 17.47 | 0     | 34 |
| IPR013968 | 2.27   | 2.8    | 2.1   | 0     | 34 |
| IPR003609 | 17.27  | 17.27  | 0     | 0     | 34 |

|           |       |       |       |      |    |
|-----------|-------|-------|-------|------|----|
| IPR000305 | 2.11  | 1.51  | 2.18  | 1.65 | 34 |
| IPR020807 | 5.22  | 8.13  | 4.55  | 0    | 34 |
| IPR002867 | 14.27 | 14.27 | 0     | 0    | 34 |
| IPR021133 | 3.31  | 4.09  | 1.13  | 1    | 34 |
| IPR001480 | 26.97 | 79.58 | 1.75  | 1    | 34 |
| IPR000120 | 3.55  | 9.84  | 3.01  | 1.49 | 34 |
| IPR006589 | 3.28  | 7.11  | 2.84  | 1.78 | 34 |
| IPR004360 | 8.7   | 6.3   | 9.23  | 3.1  | 34 |
| IPR000064 | 2.96  | 1.69  | 2.99  | 1    | 33 |
| IPR006026 | 5.66  | 14.02 | 1.39  | 1.5  | 33 |
| IPR000835 | 9.12  | 2.5   | 9.5   | 3.58 | 33 |
| PTHR19959 | 2.72  | 4.1   | 1.99  | 1    | 33 |
| IPR002859 | 2.39  | 3.17  | 1.45  | 0    | 33 |
| IPR004841 | 8.93  | 23.22 | 7.34  | 4.76 | 33 |
| IPR006121 | 5.15  | 17.54 | 3.94  | 3.13 | 33 |
| IPR000403 | 6.62  | 11.01 | 1.03  | 0    | 33 |
| IPR002104 | 8.65  | 2.92  | 9.02  | 3.62 | 33 |
| IPR002586 | 7.35  | 2     | 7.4   | 7.78 | 33 |
| IPR019749 | 17.8  | 17.8  | 0     | 0    | 33 |
| IPR011497 | 10.26 | 11.07 | 2.67  | 0    | 33 |
| IPR004045 | 10.37 | 21.12 | 7.82  | 0    | 33 |
| IPR001401 | 3.83  | 9.35  | 1.93  | 1    | 33 |
| IPR011449 | 8.88  | 11    | 8.85  | 0    | 33 |
| IPR000415 | 4.04  | 1.82  | 4.28  | 3.15 | 33 |
| PF06452   | 2.13  | 1     | 2.15  | 0    | 32 |
| IPR008638 | 2.76  | 0     | 2.76  | 0    | 32 |
| IPR003656 | 11.62 | 11.62 | 0     | 0    | 32 |
| IPR001179 | 3.7   | 11.19 | 2.96  | 1.69 | 32 |
| IPR011704 | 3.08  | 9.87  | 1.64  | 1.17 | 32 |
| IPR000254 | 12.19 | 12.19 | 0     | 0    | 32 |
| IPR001434 | 12.14 | 3     | 12.93 | 5.55 | 32 |
| IPR000192 | 5.12  | 6.85  | 5.06  | 3.02 | 32 |
| IPR013151 | 14.17 | 14.64 | 1     | 0    | 32 |
| IPR011766 | 5.67  | 4.85  | 5.64  | 7.26 | 32 |
| IPR001395 | 7.44  | 18.19 | 6.24  | 4.38 | 32 |
| IPR002890 | 1.8   | 5.97  | 1.29  | 1.4  | 32 |
| PF12171   | 6.24  | 6.24  | 0     | 0    | 32 |
| IPR013249 | 8.73  | 1.83  | 8.93  | 1.2  | 32 |
| IPR002934 | 3.05  | 3.62  | 2.64  | 6.39 | 32 |
| IPR003141 | 2.69  | 1.71  | 2.72  | 2.31 | 32 |
| IPR007867 | 4.67  | 12.41 | 3.54  | 1    | 31 |
| IPR011641 | 8.94  | 8.94  | 0     | 0    | 31 |
| IPR017877 | 7.46  | 7.66  | 1     | 0    | 31 |
| IPR001251 | 17.88 | 18.11 | 0     | 1    | 31 |
| IPR001761 | 11.8  | 1.67  | 11.88 | 1    | 31 |
| IPR018391 | 3.78  | 3.36  | 3.53  | 8.59 | 31 |
| IPR011081 | 2.73  | 0     | 2.76  | 1    | 31 |
| IPR004027 | 2.19  | 2.5   | 2.19  | 1    | 31 |
| IPR014778 | 14.98 | 14.98 | 0     | 0    | 31 |
| IPR013106 | 20.71 | 20.71 | 0     | 0    | 31 |
| IPR007484 | 3.55  | 8.16  | 2.44  | 1.29 | 31 |
| IPR018905 | 2     | 0     | 2.05  | 1.81 | 31 |
| IPR001525 | 2.75  | 5.56  | 2.39  | 1.66 | 31 |
| IPR001220 | 23.13 | 64.5  | 1.07  | 1    | 31 |
| IPR010666 | 5.02  | 5.07  | 2     | 0    | 31 |
| IPR020843 | 3.04  | 3.96  | 2.5   | 0    | 31 |
| IPR015590 | 10.17 | 16.38 | 9.92  | 2.4  | 31 |
| IPR005835 | 5.66  | 4.49  | 5.76  | 6.11 | 31 |
| IPR004827 | 20.28 | 20.28 | 0     | 0    | 31 |
| IPR001164 | 9.03  | 9.03  | 0     | 0    | 30 |
| IPR001206 | 2.41  | 6.51  | 1.78  | 1    | 30 |
| IPR008145 | 1.74  | 6.96  | 1.18  | 0    | 30 |
| IPR011511 | 3.65  | 5.31  | 1.54  | 1    | 30 |
| IPR000782 | 5.07  | 11.58 | 1.95  | 3    | 30 |
| IPR014044 | 1.86  | 3.43  | 1.76  | 1.2  | 30 |
| IPR019955 | 3.21  | 3.27  | 1     | 0    | 30 |
| IPR002007 | 4.64  | 6.09  | 2.13  | 0    | 30 |
| IPR000372 | 15.59 | 15.59 | 0     | 0    | 30 |
| IPR003137 | 3.57  | 6.61  | 2.04  | 1.25 | 30 |

|           |       |        |       |       |    |
|-----------|-------|--------|-------|-------|----|
| IPR002641 | 3.55  | 7.68   | 3.02  | 2     | 30 |
| IPR017447 | 6.73  | 7.01   | 1     | 0     | 30 |
| IPR006153 | 4.33  | 9.08   | 3.9   | 2.89  | 29 |
| IPR006158 | 3.33  | 2.36   | 3.42  | 2.42  | 29 |
| IPR002591 | 2.34  | 4.53   | 1.81  | 1.89  | 29 |
| IPR003265 | 2.98  | 4.54   | 2.82  | 2.8   | 29 |
| IPR002884 | 2.36  | 2.89   | 1.92  | 0     | 29 |
| IPR000005 | 6.23  | 1.3    | 7.1   | 0     | 29 |
| IPR002078 | 1.94  | 1.25   | 2.05  | 1     | 29 |
| IPR002508 | 1.96  | 1      | 1.96  | 1     | 29 |
| IPR003323 | 5.24  | 5.61   | 1.75  | 0     | 29 |
| IPR006141 | 1.72  | 1.5    | 1.89  | 1.17  | 29 |
| IPR002589 | 1.65  | 3.77   | 1.23  | 1     | 29 |
| IPR011510 | 3.19  | 3.19   | 0     | 0     | 29 |
| IPR003010 | 3.95  | 7.23   | 3.72  | 1.82  | 29 |
| IPR006068 | 3.03  | 9.16   | 1.88  | 2     | 29 |
| IPR004101 | 4.99  | 1.88   | 5.1   | 1.11  | 29 |
| IPR003115 | 2.46  | 1.44   | 2.56  | 1.46  | 29 |
| IPR005102 | 1.96  | 1      | 2.44  | 0     | 29 |
| IPR018771 | 1.69  | 0      | 1.64  | 3     | 29 |
| IPR007889 | 8.18  | 13.55  | 1.12  | 1.83  | 29 |
| IPR000340 | 2.86  | 6.84   | 1.18  | 1.06  | 29 |
| IPR015706 | 4     | 4      | 0     | 0     | 29 |
| IPR006555 | 1.67  | 2.88   | 1.48  | 1.59  | 29 |
| IPR001736 | 4.42  | 8.41   | 4.05  | 1.5   | 28 |
| IPR000868 | 3.5   | 4.34   | 3.51  | 1.68  | 28 |
| IPR012001 | 4.29  | 5.18   | 4.26  | 3.26  | 28 |
| IPR002921 | 4.77  | 10.79  | 1.56  | 1     | 28 |
| IPR004193 | 2.81  | 2.19   | 2.91  | 1.8   | 28 |
| IPR000488 | 12.21 | 12.81  | 1     | 0     | 28 |
| IPR012317 | 4.48  | 4.58   | 1     | 0     | 28 |
| PD968187  | 1.99  | 3.05   | 1.75  | 1.08  | 28 |
| IPR001000 | 3.13  | 6.2    | 2.43  | 3     | 28 |
| TIGR00229 | 1.42  | 2      | 1.38  | 1.5   | 28 |
| IPR011495 | 2.45  | 0      | 2.17  | 10.29 | 28 |
| IPR019554 | 3.14  | 1.62   | 3.3   | 1     | 28 |
| IPR005479 | 4.67  | 7.33   | 4.54  | 2.72  | 28 |
| IPR001943 | 2.74  | 5.86   | 2.71  | 2     | 28 |
| IPR006090 | 11.14 | 10.25  | 11.43 | 6.63  | 28 |
| IPR001482 | 3.73  | 2.11   | 3.74  | 3.91  | 28 |
| IPR011623 | 2.18  | 1      | 2.19  | 0     | 28 |
| IPR002213 | 11.27 | 33.48  | 1.88  | 0     | 28 |
| IPR002901 | 1.64  | 0      | 1.64  | 0     | 27 |
| IPR000836 | 8.35  | 8.94   | 8.35  | 7.28  | 27 |
| TIGR01444 | 1.91  | 1.85   | 1.96  | 1.33  | 27 |
| IPR002562 | 2.07  | 5.68   | 1.7   | 1     | 27 |
| IPR001879 | 11.18 | 11.18  | 0     | 0     | 27 |
| IPR003097 | 1.93  | 4.32   | 1.21  | 0     | 27 |
| IPR000070 | 5.52  | 25.53  | 1.34  | 0     | 27 |
| PF10282   | 1.71  | 2.28   | 1.65  | 3.25  | 27 |
| IPR006171 | 1.4   | 1.18   | 1.43  | 1     | 27 |
| IPR002502 | 1.86  | 1.96   | 1.86  | 0     | 27 |
| IPR011705 | 25.21 | 25.21  | 0     | 0     | 27 |
| IPR019587 | 3.79  | 6.16   | 3.61  | 3.14  | 27 |
| IPR010730 | 18.7  | 18.7   | 0     | 0     | 27 |
| IPR006656 | 5.65  | 1.59   | 6.16  | 4.07  | 27 |
| IPR000620 | 16.63 | 17.43  | 17.17 | 6.98  | 27 |
| IPR007560 | 1.42  | 1      | 1.39  | 2     | 27 |
| IPR008334 | 2.31  | 3.62   | 2.19  | 1.56  | 27 |
| IPR017986 | 2.02  | 2.16   | 1.12  | 0     | 27 |
| IPR000172 | 4.63  | 12.73  | 3.38  | 1     | 27 |
| TIGR01167 | 1.72  | 1      | 1.74  | 0     | 27 |
| IPR007742 | 1.76  | 0      | 1.12  | 5.5   | 27 |
| PTHR23155 | 15.4  | 46.5   | 1.05  | 0     | 27 |
| IPR010285 | 3.46  | 5.52   | 1.4   | 0     | 27 |
| IPR004820 | 3.09  | 6.42   | 2.75  | 3.09  | 27 |
| IPR012307 | 4.46  | 2.33   | 4.76  | 2.86  | 26 |
| IPR003582 | 24.47 | 24.47  | 0     | 0     | 26 |
| IPR001471 | 28.27 | 126.25 | 1.55  | 0     | 26 |



|           |        |        |       |      |    |
|-----------|--------|--------|-------|------|----|
| IPR001739 | 8.78   | 8.78   | 0     | 0    | 26 |
| IPR002883 | 13.5   | 0      | 13.5  | 0    | 26 |
| IPR001064 | 9.71   | 33.15  | 2.49  | 1    | 26 |
| IPR007921 | 2.93   | 6      | 2.9   | 0    | 26 |
| IPR018159 | 123.17 | 123.17 | 0     | 0    | 26 |
| IPR003657 | 69.08  | 69.08  | 0     | 0    | 26 |
| IPR002539 | 3.57   | 2.63   | 3.74  | 3    | 26 |
| TIGR02276 | 2.55   | 0      | 2.24  | 12   | 26 |
| IPR006067 | 3.01   | 3.05   | 3.03  | 2.48 | 26 |
| IPR000780 | 2.33   | 1.5    | 2.38  | 1.47 | 26 |
| IPR006657 | 5.44   | 1.09   | 5.67  | 3.67 | 26 |
| IPR011110 | 8.91   | 0      | 9     | 1    | 26 |
| IPR002125 | 3.57   | 5.92   | 3.41  | 1.44 | 26 |
| IPR006091 | 11.05  | 11.56  | 11.18 | 5.84 | 26 |
| IPR006683 | 5.78   | 6.09   | 5.93  | 3    | 26 |
| IPR006600 | 8.46   | 8.46   | 0     | 0    | 26 |
| IPR000651 | 7.95   | 7.95   | 0     | 0    | 26 |
| IPR004108 | 2.45   | 1.72   | 3     | 0    | 26 |
| IPR014853 | 10.56  | 10.56  | 0     | 0    | 26 |
| IPR000994 | 4.24   | 9.85   | 3.72  | 2.85 | 26 |
| IPR000033 | 64.35  | 73.11  | 3     | 0    | 26 |
| IPR000917 | 4.35   | 7.11   | 4.08  | 2.8  | 26 |
| IPR006578 | 37.89  | 37.89  | 0     | 0    | 26 |
| IPR001956 | 4.32   | 0      | 4.48  | 1    | 26 |
| IPR002016 | 5.23   | 27.82  | 2.28  | 2    | 25 |
| PTHR10499 | 1.53   | 2      | 1.23  | 0    | 25 |
| IPR016048 | 7.34   | 3.53   | 7.89  | 1.77 | 25 |
| IPR006575 | 6.04   | 6.04   | 0     | 0    | 25 |
| IPR005481 | 4.57   | 7.14   | 4.43  | 2.79 | 25 |
| IPR000555 | 3.93   | 9.33   | 1.1   | 1.08 | 25 |
| IPR000719 | 2.46   | 3.77   | 1.14  | 1    | 25 |
| IPR006649 | 9.72   | 14.3   | 0     | 1.67 | 25 |
| IPR013684 | 3.24   | 4.03   | 1.04  | 1.67 | 25 |
| IPR007419 | 2.63   | 1.06   | 2.72  | 1.52 | 25 |
| IPR001353 | 3.43   | 18.44  | 1.22  | 2.64 | 25 |
| IPR006175 | 3.35   | 4.01   | 3.38  | 1.14 | 25 |
| IPR019748 | 2.37   | 2.42   | 1     | 0    | 25 |
| IPR000623 | 1.88   | 3.23   | 1.81  | 1.26 | 25 |
| IPR002121 | 1.81   | 2.71   | 1.69  | 1.33 | 25 |
| IPR001327 | 1.16   | 1.33   | 1.14  | 1    | 25 |
| IPR004182 | 7.03   | 7.69   | 1     | 0    | 25 |
| IPR003409 | 18.77  | 36.73  | 7.53  | 0    | 25 |
| PF09084   | 4.07   | 1.42   | 4.38  | 1.41 | 25 |
| IPR002372 | 4.64   | 1.92   | 4.94  | 3.1  | 25 |
| IPR002376 | 3.03   | 2.91   | 3.07  | 1.68 | 25 |
| IPR002933 | 6.06   | 7.69   | 6.05  | 3.26 | 25 |
| IPR013130 | 2.48   | 7.36   | 1.29  | 1    | 25 |
| IPR003367 | 20.84  | 39.21  | 10.25 | 53   | 25 |
| IPR006103 | 2.45   | 2.52   | 2.48  | 1.22 | 25 |
| IPR006102 | 2.44   | 2.65   | 2.42  | 1.33 | 25 |
| IPR002478 | 1.82   | 3.41   | 1.39  | 4.26 | 24 |
| IPR002017 | 13.52  | 13.93  | 1     | 0    | 24 |
| IPR000793 | 2.61   | 5.43   | 2.33  | 2.13 | 24 |
| IPR001606 | 4.89   | 4.89   | 0     | 0    | 24 |
| IPR011576 | 3.31   | 2.96   | 3.35  | 3.2  | 24 |
| IPR002925 | 2.8    | 4.57   | 2.62  | 1.07 | 24 |
| IPR000850 | 1.63   | 6.59   | 1.1   | 1.37 | 24 |
| IPR003659 | 11.79  | 11.79  | 0     | 0    | 24 |
| IPR004099 | 3.68   | 3.56   | 3.76  | 2.63 | 24 |
| IPR000801 | 2.58   | 1.29   | 2.79  | 1    | 24 |
| IPR003596 | 54.67  | 54.67  | 0     | 0    | 24 |
| IPR011460 | 2.7    | 0      | 2.7   | 0    | 24 |
| PTHR18958 | 4.11   | 7.73   | 1.66  | 0    | 24 |
| IPR002218 | 1.52   | 1.25   | 1.55  | 1.06 | 24 |
| PF07567   | 29.83  | 29.83  | 0     | 0    | 24 |
| IPR003148 | 3.56   | 1.89   | 3.54  | 4.5  | 24 |
| IPR002610 | 2.19   | 6.12   | 1.73  | 1.42 | 24 |
| IPR008197 | 8.93   | 8.93   | 0     | 0    | 24 |
| IPR013211 | 3.34   | 1      | 3.1   | 6.67 | 24 |

|           |        |        |       |      |    |
|-----------|--------|--------|-------|------|----|
| IPR001315 | 13.43  | 14.74  | 1     | 0    | 24 |
| IPR006207 | 5.53   | 5.53   | 0     | 0    | 24 |
| IPR017867 | 2.19   | 2.07   | 2.23  | 1.3  | 24 |
| IPR006189 | 1.87   | 7.12   | 1.62  | 1    | 24 |
| IPR005117 | 3.35   | 3.65   | 3.38  | 2.52 | 24 |
| IPR000922 | 8.44   | 9.34   | 1.25  | 0    | 24 |
| IPR002018 | 7.66   | 19.87  | 2.15  | 1.5  | 23 |
| IPR006222 | 2.3    | 3.34   | 2.22  | 1.35 | 23 |
| IPR004330 | 13.88  | 13.88  | 0     | 0    | 23 |
| IPR003604 | 8.26   | 8.26   | 0     | 0    | 23 |
| IPR013520 | 1.44   | 1.82   | 1.38  | 1.43 | 23 |
| IPR000001 | 11.11  | 11.11  | 0     | 0    | 23 |
| IPR013099 | 3.36   | 13.92  | 1.68  | 1.58 | 23 |
| IPR000858 | 109.14 | 109.14 | 0     | 0    | 23 |
| IPR013740 | 2.82   | 2.8    | 2.85  | 1.22 | 23 |
| IPR012310 | 2.19   | 3.51   | 1.99  | 1.46 | 23 |
| IPR006594 | 6.73   | 6.81   | 1     | 0    | 23 |
| IPR007895 | 1.93   | 1.5    | 1.93  | 0    | 23 |
| IPR003129 | 7.27   | 7.27   | 0     | 0    | 23 |
| IPR003124 | 5.51   | 5.9    | 1     | 0    | 23 |
| IPR011708 | 1.64   | 1.5    | 1.64  | 0    | 23 |
| IPR001374 | 1.64   | 3.58   | 1.14  | 0    | 23 |
| IPR002314 | 5.14   | 8.72   | 4.77  | 5.13 | 23 |
| IPR006092 | 10.86  | 8.89   | 11.32 | 5.42 | 23 |
| IPR000938 | 5.88   | 6.01   | 1     | 0    | 23 |
| IPR006860 | 4.9    | 2      | 4.91  | 0    | 23 |
| IPR013155 | 3.84   | 5.95   | 3.6   | 4.09 | 23 |
| IPR001298 | 43.95  | 43.95  | 0     | 0    | 23 |
| IPR003615 | 2.56   | 2.75   | 2.58  | 1.33 | 23 |
| IPR006670 | 14.76  | 20.91  | 0     | 3.78 | 23 |
| IPR008756 | 2.01   | 1      | 2.03  | 0    | 23 |
| IPR010559 | 2.96   | 2.6    | 2.97  | 0    | 23 |
| IPR006694 | 3.17   | 7.45   | 2.1   | 1    | 22 |
| IPR013498 | 2.72   | 1.7    | 2.79  | 2.21 | 22 |
| IPR006212 | 18.63  | 18.63  | 0     | 0    | 22 |
| IPR000716 | 11.31  | 12.97  | 1     | 0    | 22 |
| IPR005645 | 2.78   | 3.54   | 1.03  | 0    | 22 |
| IPR001599 | 1.85   | 5.81   | 1.24  | 1    | 22 |
| IPR004017 | 5.33   | 2.5    | 5.27  | 6.1  | 22 |
| PF06283   | 2.19   | 1      | 2.3   | 1    | 22 |
| IPR006145 | 5.1    | 3.03   | 5.32  | 1    | 22 |
| IPR001915 | 3.09   | 2.7    | 3.18  | 2.44 | 22 |
| IPR002553 | 9.25   | 10.33  | 1     | 1.43 | 22 |
| IPR007081 | 1.33   | 4      | 1.02  | 2.04 | 22 |
| IPR002625 | 1.44   | 3.42   | 1.24  | 0    | 22 |
| PTHR22904 | 1.88   | 2.35   | 1.13  | 1    | 22 |
| TIGR01965 | 13.67  | 0      | 13.67 | 0    | 22 |
| IPR001310 | 1.96   | 2.99   | 1.86  | 1.7  | 22 |
| IPR013163 | 3.01   | 1      | 2.98  | 5.5  | 22 |
| IPR001229 | 12.15  | 17.64  | 1.2   | 1    | 22 |
| IPR009081 | 1.63   | 2.44   | 1.34  | 0    | 22 |
| IPR007202 | 1.4    | 1      | 1.34  | 2.58 | 22 |
| IPR006963 | 4.02   | 1      | 4.16  | 2.52 | 22 |
| IPR008191 | 12.18  | 12.18  | 0     | 0    | 22 |
| IPR006620 | 3.44   | 9.48   | 1.61  | 0    | 22 |
| IPR007630 | 4.13   | 7.56   | 4.16  | 1.11 | 21 |
| IPR000743 | 7.33   | 23.15  | 2.39  | 1    | 21 |
| IPR000297 | 2.88   | 2.33   | 2.95  | 1    | 21 |
| IPR004273 | 6.36   | 6.36   | 0     | 0    | 21 |
| IPR000834 | 3.38   | 9.66   | 1.79  | 1    | 21 |
| IPR012640 | 1.18   | 1      | 1.18  | 0    | 21 |
| IPR014045 | 1.82   | 2.04   | 1.27  | 0    | 21 |
| IPR003601 | 1.64   | 2      | 1.59  | 1.82 | 21 |
| IPR011129 | 4.89   | 6.91   | 4.78  | 3.43 | 21 |
| IPR001494 | 9.51   | 9.74   | 1     | 0    | 21 |
| IPR007421 | 1.65   | 5.67   | 1.54  | 1.75 | 21 |
| IPR000535 | 5.86   | 6.18   | 1.2   | 0    | 21 |
| IPR000531 | 17.13  | 10     | 17.18 | 0    | 21 |
| IPR007892 | 1.47   | 0      | 1.44  | 2    | 21 |

|           |       |       |       |      |    |
|-----------|-------|-------|-------|------|----|
| IPR004014 | 3.11  | 10.1  | 1.9   | 2.21 | 21 |
| IPR006143 | 10.11 | 2.8   | 10.17 | 0    | 21 |
| IPR001002 | 8.3   | 8.3   | 0     | 0    | 21 |
| IPR011707 | 3.45  | 11.94 | 2.02  | 2.67 | 21 |
| IPR004129 | 2.55  | 4.89  | 2.29  | 1.36 | 21 |
| IPR000095 | 6.73  | 6.73  | 0     | 0    | 21 |
| IPR004853 | 9.7   | 9.93  | 1     | 0    | 21 |
| PTHR23258 | 8.52  | 9.17  | 1     | 0    | 21 |
| IPR001853 | 2.96  | 2.74  | 3.01  | 1.87 | 21 |
| IPR005181 | 2.39  | 2.79  | 2.34  | 1    | 21 |
| IPR004176 | 4.2   | 7.43  | 4.02  | 2    | 21 |
| IPR004170 | 3.42  | 3.49  | 1     | 0    | 21 |
| IPR002711 | 1.53  | 1.67  | 1.53  | 1.2  | 21 |
| IPR010488 | 1.44  | 2.57  | 1.32  | 1    | 21 |
| IPR002818 | 4.24  | 4.22  | 4.39  | 1.9  | 21 |
| IPR001451 | 3.55  | 2.86  | 3.67  | 2.86 | 21 |
| IPR000342 | 10.4  | 10.4  | 0     | 0    | 21 |
| IPR005113 | 4.51  | 4.69  | 1     | 0    | 21 |
| IPR004000 | 12.03 | 13.11 | 1     | 1    | 20 |
| IPR005804 | 3.85  | 7.79  | 3.03  | 0    | 20 |
| IPR011716 | 1.8   | 2.14  | 1.79  | 1.5  | 20 |
| IPR002165 | 5.42  | 5.42  | 0     | 0    | 20 |
| IPR005543 | 5.1   | 4     | 5.13  | 1    | 20 |
| IPR019565 | 2.14  | 5.1   | 1.08  | 1    | 20 |
| IPR001194 | 5.49  | 5.49  | 0     | 0    | 20 |
| IPR020616 | 4.69  | 5.31  | 4.83  | 2.04 | 20 |
| IPR011124 | 7.71  | 7.71  | 0     | 0    | 20 |
| IPR004143 | 2.53  | 3.1   | 2.47  | 2.45 | 20 |
| IPR000562 | 10.93 | 10.93 | 0     | 0    | 20 |
| IPR001496 | 14.44 | 14.44 | 0     | 0    | 20 |
| IPR006176 | 3.17  | 3.72  | 3.12  | 2.67 | 20 |
| IPR001034 | 4.2   | 1     | 4.27  | 1.22 | 20 |
| IPR004837 | 4.37  | 14.63 | 2.63  | 3.41 | 20 |
| IPR011547 | 2.73  | 6.41  | 2.19  | 1.55 | 20 |
| IPR004154 | 3.78  | 6.95  | 3.44  | 4.22 | 20 |
| IPR006037 | 3.78  | 3     | 3.75  | 4.18 | 20 |
| IPR007890 | 1.87  | 0     | 1.87  | 0    | 20 |
| IPR007891 | 1.72  | 1     | 1.72  | 2    | 20 |
| IPR001667 | 2.2   | 1.19  | 2.18  | 3.61 | 20 |
| IPR005151 | 2     | 2.94  | 1.96  | 1    | 20 |
| IPR003864 | 4.84  | 4.84  | 0     | 0    | 20 |
| IPR001701 | 4.99  | 20.09 | 2.31  | 1    | 20 |
| IPR004869 | 4.95  | 2.86  | 5.2   | 2.89 | 20 |
| IPR011706 | 3.44  | 11.88 | 1.98  | 2    | 20 |
| IPR011063 | 1.63  | 1.82  | 1.62  | 1.48 | 20 |
| IPR003781 | 2.5   | 2.45  | 2.48  | 3    | 20 |
| IPR004043 | 2.66  | 2.72  | 2.2   | 0    | 20 |
| IPR004044 | 1.15  | 1.67  | 1.08  | 1.41 | 20 |
| PF10342   | 2.3   | 3.42  | 1.41  | 1    | 20 |
| IPR000194 | 1.7   | 4.29  | 1.41  | 1.8  | 20 |
| IPR007055 | 4.2   | 2.33  | 4.21  | 0    | 20 |
| IPR011260 | 1.11  | 1.88  | 1.1   | 0    | 20 |
| IPR005075 | 2.68  | 1     | 2.7   | 1.8  | 20 |
| IPR011096 | 2.61  | 2     | 2.66  | 0    | 20 |
| IPR003649 | 6.04  | 6.04  | 0     | 0    | 20 |
| IPR001212 | 8.48  | 8.47  | 9     | 0    | 20 |
| IPR008279 | 2.65  | 2.11  | 2.73  | 1.6  | 20 |
| IPR015883 | 2.5   | 3.83  | 2.02  | 1    | 20 |
| IPR001453 | 3.43  | 2.77  | 3.44  | 4.3  | 20 |
| IPR003480 | 38.31 | 39.8  | 1     | 0    | 20 |
| IPR000999 | 1.79  | 7.57  | 1.25  | 1.4  | 20 |
| IPR001711 | 3.76  | 3.79  | 2.5   | 0    | 20 |
| IPR006558 | 3.71  | 1.5   | 4.6   | 0    | 20 |
| IPR002300 | 3.89  | 7.79  | 3.52  | 3.33 | 20 |
| IPR011102 | 4.88  | 1     | 4.93  | 0    | 20 |
| IPR004331 | 6.93  | 6.93  | 0     | 0    | 19 |
| IPR006020 | 19.87 | 19.87 | 0     | 0    | 19 |
| IPR006021 | 2.48  | 6.16  | 1.71  | 1.1  | 19 |
| IPR003151 | 4.07  | 4.07  | 0     | 0    | 19 |

|           |       |       |       |      |    |
|-----------|-------|-------|-------|------|----|
| IPR001190 | 2.67  | 3.08  | 1     | 0    | 19 |
| IPR006151 | 2.23  | 3.08  | 2.2   | 2    | 19 |
| IPR001030 | 2.76  | 4.3   | 2.61  | 2.44 | 19 |
| IPR000606 | 1.34  | 1.26  | 1.35  | 1    | 19 |
| IPR011489 | 6.17  | 6.17  | 0     | 0    | 19 |
| IPR003886 | 2.96  | 3.41  | 1     | 0    | 19 |
| IPR011645 | 5.54  | 6.34  | 1.86  | 0    | 19 |
| IPR003107 | 13.48 | 13.48 | 0     | 0    | 19 |
| IPR003340 | 95.44 | 95.44 | 0     | 0    | 19 |
| PF03564   | 11.05 | 11.61 | 1     | 0    | 19 |
| IPR012000 | 3.66  | 4.76  | 3.62  | 2.55 | 19 |
| IPR000906 | 5.39  | 5.82  | 1.5   | 1    | 19 |
| IPR018933 | 5.74  | 5.88  | 1     | 0    | 19 |
| IPR001264 | 3.22  | 1.8   | 3.23  | 0    | 19 |
| IPR005797 | 3.92  | 12.24 | 3.02  | 2.04 | 19 |
| IPR001300 | 8.03  | 9.45  | 1.33  | 0    | 19 |
| PF07581   | 3.74  | 1     | 3.72  | 5.5  | 19 |
| IPR018061 | 1.73  | 3.75  | 1.29  | 1.62 | 19 |
| IPR001460 | 5.24  | 2     | 5.26  | 0    | 19 |
| IPR005150 | 10.45 | 42.67 | 1.1   | 0    | 19 |
| IPR013587 | 1.78  | 1.18  | 1.88  | 0    | 19 |
| IPR005502 | 1.58  | 2.12  | 1.55  | 1.14 | 19 |
| IPR002053 | 1.84  | 2.5   | 1.81  | 0    | 19 |
| IPR000111 | 2.02  | 3.19  | 1.65  | 1    | 19 |
| IPR006115 | 3.47  | 4.71  | 3.41  | 1.52 | 19 |
| IPR002792 | 2.52  | 1.95  | 2.53  | 2.84 | 19 |
| IPR007569 | 1.66  | 0     | 1.66  | 0    | 19 |
| PF12003   | 4.44  | 4.44  | 0     | 0    | 19 |
| IPR000594 | 3.12  | 10.06 | 2.38  | 1.43 | 19 |
| IPR012902 | 5.1   | 3.5   | 5.1   | 0    | 19 |
| IPR005490 | 4.14  | 2     | 4.15  | 0    | 19 |
| IPR011528 | 1.44  | 1.4   | 1.46  | 1    | 19 |
| IPR001180 | 5.25  | 5.25  | 0     | 0    | 19 |
| IPR013162 | 26.56 | 26.56 | 0     | 0    | 19 |
| IPR013624 | 2.29  | 0     | 2.29  | 0    | 19 |
| IPR002068 | 3.3   | 10.45 | 2.32  | 2.26 | 19 |
| IPR011622 | 1.91  | 0     | 1.91  | 0    | 19 |
| IPR011625 | 1.7   | 5.68  | 1.19  | 1    | 19 |
| IPR011626 | 3.88  | 6.16  | 1.17  | 1    | 19 |
| IPR000847 | 26.46 | 6.5   | 27.77 | 1.5  | 19 |
| IPR008757 | 1.57  | 4     | 1.54  | 0    | 19 |
| IPR001048 | 4.98  | 3.87  | 5.1   | 4.67 | 19 |
| IPR000923 | 1.78  | 1.58  | 1.61  | 3.61 | 19 |
| IPR003749 | 2.14  | 1.06  | 2.18  | 2.44 | 19 |
| IPR000583 | 4.39  | 5.93  | 4.28  | 3.63 | 18 |
| IPR000462 | 2.73  | 4.95  | 2.55  | 1.83 | 18 |
| IPR001905 | 1.98  | 5.57  | 1.53  | 1.42 | 18 |
| IPR000362 | 3.53  | 3.97  | 3.55  | 2.32 | 18 |
| IPR010432 | 1.79  | 1.45  | 1.82  | 1.33 | 18 |
| IPR013594 | 4.02  | 4.02  | 0     | 0    | 18 |
| IPR002528 | 7.44  | 23.79 | 6.1   | 5.89 | 18 |
| IPR013602 | 6.03  | 6.03  | 0     | 0    | 18 |
| PF01946   | 1.41  | 1.89  | 1.31  | 1.32 | 18 |
| IPR003602 | 1.63  | 1.96  | 1.58  | 1.82 | 18 |
| IPR020617 | 4.87  | 5.41  | 5     | 2.52 | 18 |
| IPR003342 | 1.89  | 3.5   | 1.7   | 1.42 | 18 |
| IPR003033 | 2.05  | 3.05  | 1.85  | 2.18 | 18 |
| PTHR13824 | 4.13  | 4.16  | 4     | 0    | 18 |
| IPR005123 | 5.61  | 22.62 | 1.68  | 0    | 18 |
| PTHR10588 | 1.74  | 2.56  | 1.09  | 0    | 18 |
| PF03004   | 47.5  | 47.5  | 0     | 0    | 18 |
| IPR001818 | 1.43  | 2.86  | 1.34  | 1.5  | 18 |
| IPR000800 | 6.69  | 6.69  | 0     | 0    | 18 |
| IPR004012 | 10.07 | 10.07 | 0     | 0    | 18 |
| IPR007138 | 2.96  | 1.79  | 3.11  | 1.24 | 18 |
| IPR013994 | 4.19  | 4.19  | 0     | 0    | 18 |
| IPR001126 | 2.2   | 3.67  | 2.05  | 1.15 | 18 |
| IPR013899 | 2.51  | 2.51  | 0     | 0    | 18 |
| IPR006569 | 4.81  | 4.81  | 0     | 0    | 18 |

|                |        |        |      |      |    |
|----------------|--------|--------|------|------|----|
| PTHR19446:SF34 | 83.44  | 83.44  | 0    | 0    | 18 |
| IPR014876      | 3.59   | 3.59   | 0    | 0    | 18 |
| IPR007409      | 1.83   | 1      | 1.85 | 1.5  | 18 |
| IPR005074      | 1.86   | 1      | 1.86 | 3.5  | 18 |
| IPR011607      | 2.35   | 2.43   | 2.37 | 1.36 | 18 |
| IPR003645      | 4.86   | 4.86   | 0    | 0    | 18 |
| IPR001313      | 32.06  | 32.06  | 0    | 0    | 18 |
| IPR019489      | 4.19   | 4.1    | 4.21 | 1    | 18 |
| IPR010569      | 4.04   | 4.04   | 0    | 0    | 18 |
| IPR003890      | 7.88   | 7.88   | 0    | 0    | 18 |
| IPR003892      | 5.45   | 5.51   | 1    | 0    | 18 |
| IPR006671      | 3.99   | 3.99   | 0    | 0    | 18 |
| IPR003819      | 3.64   | 5.69   | 3.06 | 0    | 18 |
| IPR000891      | 3.3    | 3.62   | 3.27 | 3.28 | 18 |
| IPR017956      | 1.69   | 2.69   | 1.04 | 0    | 18 |
| PTHR23083:SF20 | 1.24   | 1.15   | 1.25 | 1.29 | 18 |
| IPR004364      | 3.19   | 7.04   | 2.88 | 1.98 | 18 |
| IPR001347      | 6.26   | 3.73   | 6.64 | 4.09 | 18 |
| IPR000572      | 2.32   | 2.59   | 2.34 | 1.57 | 18 |
| IPR001628      | 33.71  | 33.71  | 0    | 0    | 18 |
| IPR011424      | 51.38  | 51.38  | 0    | 0    | 18 |
| IPR006574      | 33.6   | 33.6   | 0    | 0    | 18 |
| IPR005112      | 4.67   | 4.67   | 0    | 0    | 18 |
| IPR010918      | 4.51   | 3.9    | 4.48 | 5.91 | 18 |
| IPR005064      | 9.07   | 16.67  | 8.96 | 0    | 17 |
| IPR011616      | 3.5    | 3.67   | 1    | 1    | 17 |
| IPR003156      | 2.64   | 1.41   | 2.69 | 3.39 | 17 |
| IPR015414      | 3.58   | 3.18   | 3.74 | 1.51 | 17 |
| IPR001208      | 5.31   | 7.74   | 1    | 1.48 | 17 |
| IPR001909      | 186    | 212.43 | 1    | 0    | 17 |
| IPR013112      | 4.36   | 6.81   | 1.12 | 0    | 17 |
| IPR003579      | 24.86  | 24.86  | 0    | 0    | 17 |
| PF07725        | 79.5   | 79.5   | 0    | 0    | 17 |
| IPR002491      | 4.17   | 1.6    | 4.2  | 4.09 | 17 |
| IPR001360      | 3.75   | 11.1   | 2.74 | 2    | 17 |
| IPR007526      | 4.48   | 4.48   | 0    | 0    | 17 |
| IPR002563      | 2.71   | 2.44   | 2.79 | 1.68 | 17 |
| IPR007728      | 3.25   | 3.25   | 0    | 0    | 17 |
| IPR003100      | 6.74   | 6.74   | 0    | 0    | 17 |
| IPR002656      | 4.09   | 10.36  | 3.61 | 1.86 | 17 |
| IPR004846      | 2.87   | 1      | 2.89 | 0    | 17 |
| IPR009818      | 6.83   | 6.83   | 0    | 0    | 17 |
| IPR001936      | 5.62   | 5.62   | 0    | 0    | 17 |
| IPR006083      | 2.1    | 3.61   | 1.92 | 1    | 17 |
| IPR002075      | 3.24   | 5.18   | 1.62 | 1    | 17 |
| IPR013122      | 4.14   | 4.14   | 0    | 0    | 17 |
| IPR002857      | 4.77   | 4.77   | 0    | 0    | 17 |
| IPR003958      | 6.1    | 7.53   | 0    | 2.13 | 17 |
| IPR013200      | 3.45   | 3.34   | 3.53 | 2.21 | 17 |
| IPR003597      | 118.32 | 118.32 | 0    | 0    | 17 |
| IPR004013      | 1.67   | 1.13   | 1.76 | 1.38 | 17 |
| IPR000673      | 2.29   | 1      | 2.32 | 1.53 | 17 |
| IPR017923      | 3.18   | 3.18   | 0    | 0    | 17 |
| PF09699        | 5.91   | 0      | 5.91 | 0    | 17 |
| IPR008613      | 1.33   | 0      | 1.33 | 1    | 17 |
| IPR005025      | 3.45   | 4.35   | 3.33 | 4.66 | 17 |
| IPR007080      | 1.26   | 3.88   | 1.02 | 1.04 | 17 |
| IPR003356      | 2.26   | 1      | 2.3  | 1.59 | 17 |
| IPR012951      | 3.99   | 14.13  | 1.62 | 1    | 17 |
| IPR000322      | 2.6    | 5.16   | 1.79 | 1.62 | 17 |
| IPR021796      | 1.91   | 0      | 1.91 | 0    | 17 |
| IPR006119      | 3.49   | 1.5    | 3.54 | 2.82 | 17 |
| IPR011017      | 1.9    | 2.47   | 1.45 | 1.86 | 17 |
| IPR020946      | 5.12   | 10.13  | 3.28 | 0    | 17 |
| IPR011095      | 1.43   | 2.74   | 1.4  | 1    | 17 |
| IPR008278      | 1.67   | 2.3    | 1.63 | 1.33 | 17 |
| IPR000949      | 5.3    | 5.3    | 0    | 0    | 17 |
| IPR006204      | 2.95   | 5.47   | 2.59 | 4.57 | 17 |
| IPR009959      | 2.54   | 1.96   | 2.62 | 1.12 | 17 |

|                |       |       |      |      |    |
|----------------|-------|-------|------|------|----|
| IPR000728      | 4.2   | 2.86  | 4.2  | 6.33 | 17 |
| IPR013534      | 1.59  | 5.35  | 1.31 | 1.71 | 17 |
| IPR013702      | 1.42  | 1.14  | 1.44 | 1.12 | 17 |
| IPR006137      | 2.29  | 1.94  | 2.26 | 3.17 | 17 |
| IPR000573      | 2.29  | 3.9   | 2.13 | 2.23 | 17 |
| IPR003362      | 2.12  | 1.33  | 2.13 | 1    | 17 |
| IPR018516      | 3     | 3     | 0    | 0    | 17 |
| IPR018518      | 2.9   | 2.9   | 0    | 0    | 17 |
| IPR013750      | 2.57  | 4.42  | 2.35 | 2.98 | 17 |
| IPR012308      | 1.65  | 3.17  | 1.02 | 1.11 | 16 |
| IPR013654      | 2.03  | 3.89  | 1.63 | 0    | 16 |
| IPR001678      | 2.03  | 5.68  | 1.6  | 2.37 | 16 |
| IPR011459      | 1.49  | 1     | 1.46 | 2    | 16 |
| IPR005144      | 1.94  | 1.24  | 2    | 2    | 16 |
| IPR007120      | 1.26  | 3.83  | 1.03 | 1    | 16 |
| IPR013515      | 2.03  | 4     | 1.62 | 0    | 16 |
| PTHR10178      | 7.44  | 7.44  | 0    | 0    | 16 |
| IPR001734      | 3.7   | 6.97  | 3.38 | 2.24 | 16 |
| IPR001283      | 10.29 | 11.86 | 1.31 | 0    | 16 |
| IPR002201      | 3.35  | 1.5   | 3.38 | 1    | 16 |
| PF07819        | 1.55  | 2.25  | 1.31 | 1    | 16 |
| IPR003888      | 3.27  | 3.27  | 0    | 0    | 16 |
| PTHR19328      | 1.19  | 1.5   | 1.17 | 1    | 16 |
| IPR007751      | 2.22  | 3.15  | 1.06 | 0    | 16 |
| IPR000300      | 5.31  | 5.31  | 0    | 0    | 16 |
| IPR001590      | 10.22 | 11.95 | 1.14 | 1    | 16 |
| IPR001594      | 12.52 | 12.96 | 1    | 0    | 16 |
| IPR002102      | 3.5   | 0     | 4    | 1.25 | 16 |
| IPR002227      | 4     | 5.86  | 1.24 | 0    | 16 |
| IPR000538      | 14.2  | 14.2  | 0    | 0    | 16 |
| IPR000536      | 30.48 | 30.48 | 0    | 0    | 16 |
| IPR003126      | 2.89  | 2.89  | 0    | 0    | 16 |
| PF06739        | 7.85  | 0     | 8.04 | 6.33 | 16 |
| IPR008211      | 7.59  | 7.59  | 0    | 0    | 16 |
| IPR006260      | 3.29  | 3     | 3.29 | 0    | 16 |
| IPR003251      | 2.67  | 2.17  | 2.66 | 2.88 | 16 |
| IPR014048      | 1.86  | 1.41  | 1.94 | 1.02 | 16 |
| IPR002942      | 6.7   | 5.15  | 7.16 | 1.89 | 16 |
| IPR007083      | 1.22  | 3.48  | 1.02 | 1.02 | 16 |
| IPR018031      | 6.74  | 6.74  | 0    | 0    | 16 |
| PF08433        | 1.33  | 1.69  | 1.09 | 1    | 16 |
| IPR014782      | 2.65  | 9.44  | 1.62 | 1.58 | 16 |
| IPR005844      | 3.01  | 5.01  | 2.86 | 2.11 | 16 |
| IPR011112      | 1.17  | 2.83  | 1.14 | 0    | 16 |
| IPR001570      | 2.26  | 1     | 2.3  | 0    | 16 |
| IPR005476      | 3.87  | 4.62  | 3.87 | 2.61 | 16 |
| IPR002129      | 2.67  | 7.66  | 1.64 | 1.21 | 16 |
| IPR007644      | 1.24  | 3.64  | 1.02 | 1    | 16 |
| IPR010909      | 6.21  | 6.21  | 0    | 0    | 16 |
| IPR007934      | 1.7   | 1.62  | 1.79 | 0    | 16 |
| IPR006689      | 3.66  | 4.47  | 1.7  | 1    | 16 |
| IPR006531      | 3.43  | 1     | 3.45 | 1    | 16 |
| IPR000286      | 2.6   | 7.88  | 1.65 | 1.76 | 16 |
| IPR004263      | 11.28 | 14.42 | 1    | 0    | 16 |
| IPR014805      | 2.59  | 2.59  | 0    | 0    | 16 |
| IPR002524      | 3.06  | 7.52  | 2.65 | 1.96 | 16 |
| IPR005132      | 1.75  | 5.8   | 1.43 | 0    | 16 |
| IPR001977      | 1.08  | 1.59  | 1.04 | 1    | 16 |
| IPR000375      | 5.71  | 5.71  | 0    | 0    | 16 |
| IPR007066      | 1.3   | 3.84  | 1.07 | 1.02 | 16 |
| IPR003769      | 1.19  | 1.4   | 1.17 | 0    | 16 |
| PTHR18937      | 1.24  | 1.43  | 1.16 | 1.3  | 16 |
| IPR004100      | 2.8   | 5.31  | 2.56 | 2.07 | 16 |
| IPR006048      | 1.53  | 3.21  | 1.29 | 1.11 | 16 |
| IPR011108      | 1.75  | 2.61  | 1.57 | 2.52 | 16 |
| IPR004939      | 1.59  | 1.59  | 0    | 0    | 16 |
| IPR000722      | 1.18  | 3.03  | 1.02 | 1    | 16 |
| IPR003333      | 1.92  | 3.21  | 1.82 | 1    | 16 |
| PTHR23083:SF23 | 1.67  | 4.3   | 1.17 | 1    | 16 |

|           |        |        |       |      |    |
|-----------|--------|--------|-------|------|----|
| IPR001077 | 3.94   | 14.26  | 1.66  | 1.71 | 16 |
| IPR000261 | 8.87   | 9.1    | 1     | 0    | 16 |
| IPR001137 | 2.17   | 3.27   | 1.67  | 2    | 16 |
| IPR008847 | 1.65   | 1.65   | 0     | 0    | 16 |
| IPR006552 | 1.41   | 1.41   | 0     | 0    | 16 |
| IPR011620 | 1.82   | 0      | 1.83  | 1.25 | 16 |
| IPR001851 | 11.47  | 4.67   | 11.74 | 5.83 | 16 |
| IPR002870 | 10.73  | 11.42  | 0     | 2    | 16 |
| IPR000432 | 2.13   | 5.57   | 1.75  | 1.86 | 16 |
| IPR005119 | 27.16  | 10.83  | 27.67 | 1    | 16 |
| IPR002469 | 2.69   | 3.07   | 2.48  | 1    | 16 |
| PF00637   | 3.39   | 3.39   | 0     | 0    | 16 |
| PTHR23224 | 7.14   | 7.29   | 0     | 1    | 16 |
| PTHR12697 | 1.33   | 1.5    | 1.33  | 1.2  | 15 |
| IPR020058 | 2.22   | 3.53   | 2.16  | 1    | 15 |
| IPR012309 | 2.15   | 2.78   | 2.16  | 1.11 | 15 |
| IPR000294 | 10.87  | 10.87  | 0     | 0    | 15 |
| IPR013856 | 2.19   | 1      | 2.23  | 0    | 15 |
| IPR003152 | 4.58   | 4.58   | 0     | 0    | 15 |
| IPR000582 | 3.11   | 4.81   | 1.03  | 0    | 15 |
| IPR010822 | 1.52   | 1.33   | 1.58  | 1    | 15 |
| IPR019782 | 1.59   | 1.81   | 1.07  | 0    | 15 |
| IPR020422 | 5.03   | 7.08   | 1.02  | 0    | 15 |
| IPR013519 | 16.9   | 22.16  | 10.68 | 4    | 15 |
| IPR017936 | 1.37   | 1.62   | 1.35  | 1    | 15 |
| IPR011711 | 8.29   | 3      | 8.45  | 1.11 | 15 |
| IPR004136 | 2.29   | 4.05   | 2.16  | 0    | 15 |
| TIGR02601 | 8.42   | 0      | 8.42  | 0    | 15 |
| IPR005482 | 2.54   | 4.15   | 2.46  | 1.03 | 15 |
| IPR003889 | 2.72   | 2.72   | 0     | 0    | 15 |
| IPR001368 | 13.49  | 13.82  | 2     | 0    | 15 |
| IPR000861 | 1.4    | 1.4    | 0     | 0    | 15 |
| IPR001078 | 2.66   | 4.17   | 2.53  | 1    | 15 |
| IPR005302 | 1.83   | 3.29   | 1.67  | 1.17 | 15 |
| IPR003441 | 136.71 | 136.71 | 0     | 0    | 15 |
| IPR013121 | 6.77   | 6.85   | 1     | 0    | 15 |
| IPR013042 | 6.5    | 0      | 6.5   | 0    | 15 |
| IPR013043 | 6.38   | 0      | 6.38  | 0    | 15 |
| IPR005824 | 2.38   | 6.71   | 1.89  | 2.26 | 15 |
| IPR001510 | 2.72   | 2.72   | 0     | 0    | 15 |
| IPR021731 | 1.63   | 1      | 1.63  | 0    | 15 |
| IPR006596 | 1.74   | 3.22   | 1.32  | 3    | 15 |
| IPR006595 | 6.62   | 6.62   | 0     | 0    | 15 |
| IPR015202 | 3.03   | 4.44   | 1.48  | 0    | 15 |
| IPR001995 | 1.18   | 1.36   | 1.07  | 1    | 15 |
| IPR001461 | 15.68  | 17.09  | 1.25  | 0    | 15 |
| IPR009048 | 5.47   | 6.19   | 1     | 1    | 15 |
| PF01389   | 2.17   | 0      | 2.17  | 0    | 15 |
| IPR003329 | 1.63   | 1.31   | 1.66  | 1.43 | 15 |
| IPR013507 | 1.22   | 2.82   | 1.04  | 1.14 | 15 |
| IPR002423 | 2.67   | 14.54  | 1.39  | 2.46 | 15 |
| IPR019248 | 1.77   | 0      | 1.38  | 2.67 | 15 |
| IPR015083 | 4.2    | 0      | 4.2   | 0    | 15 |
| IPR013039 | 6.75   | 0      | 6.75  | 0    | 15 |
| IPR000022 | 2.35   | 2.9    | 2.33  | 1.29 | 15 |
| IPR003423 | 13.6   | 7      | 13.65 | 0    | 15 |
| IPR007029 | 1.59   | 1.5    | 1.57  | 1.79 | 15 |
| IPR001373 | 6.37   | 6.37   | 0     | 0    | 15 |
| IPR000542 | 4.04   | 4.79   | 1     | 0    | 15 |
| IPR013108 | 2.91   | 2.14   | 3.08  | 1.49 | 15 |
| IPR001247 | 3.08   | 6.82   | 2.73  | 2    | 15 |
| IPR005845 | 2.87   | 4.16   | 2.79  | 2.04 | 15 |
| IPR005475 | 4.48   | 6.3    | 4.39  | 1.62 | 15 |
| IPR019591 | 1.29   | 2.97   | 1.1   | 1.42 | 15 |
| IPR007487 | 1.68   | 1      | 1.69  | 1    | 15 |
| IPR011016 | 6.56   | 6.56   | 0     | 0    | 15 |
| IPR001155 | 3.45   | 7.14   | 3.23  | 1.21 | 15 |
| PF02129   | 1.75   | 2.92   | 1.71  | 1.12 | 15 |
| PF03190   | 1.42   | 1.3    | 1.46  | 1.25 | 15 |

|                |       |       |      |      |    |
|----------------|-------|-------|------|------|----|
| IPR008893      | 1.79  | 2.1   | 1.62 | 0    | 15 |
| PF07534        | 3.87  | 3.93  | 1    | 0    | 15 |
| IPR006501      | 73.12 | 73.12 | 0    | 0    | 15 |
| IPR008671      | 1.49  | 2.7   | 1.27 | 1.09 | 15 |
| IPR001107      | 3.61  | 7.97  | 3.22 | 1.88 | 15 |
| PF02156        | 1.63  | 1.2   | 1.65 | 2    | 15 |
| IPR003891      | 6.08  | 6.08  | 0    | 0    | 15 |
| IPR001455      | 1.84  | 1     | 1.77 | 3.06 | 15 |
| IPR003812      | 2.1   | 1.41  | 2.17 | 1.48 | 15 |
| IPR003813      | 2.52  | 0     | 2.85 | 1.68 | 15 |
| IPR007371      | 1.12  | 1.39  | 1.06 | 0    | 15 |
| IPR013538      | 3.08  | 1.31  | 3.54 | 1.33 | 15 |
| IPR004179      | 2.52  | 2.74  | 0    | 1    | 15 |
| IPR000600      | 3.71  | 2.2   | 3.82 | 1.11 | 15 |
| IPR002145      | 2.43  | 0     | 2.2  | 4.5  | 15 |
| IPR015359      | 3.75  | 3.89  | 1    | 0    | 15 |
| IPR001117      | 3.27  | 11.6  | 1.6  | 1    | 15 |
| PF12146        | 2.07  | 4.4   | 1.86 | 1    | 15 |
| TIGR03661      | 1.4   | 0     | 1.4  | 0    | 15 |
| IPR001627      | 11.76 | 11.76 | 0    | 0    | 15 |
| IPR000770      | 3.5   | 3.5   | 0    | 0    | 15 |
| IPR003169      | 3.01  | 3.01  | 0    | 0    | 15 |
| IPR018316      | 2     | 10.13 | 1.05 | 1.89 | 15 |
| IPR006186      | 11.71 | 15.1  | 1    | 1.05 | 15 |
| IPR007329      | 2.18  | 0     | 2.18 | 1    | 15 |
| IPR020059      | 1.27  | 2.5   | 1.04 | 1    | 14 |
| IPR002902      | 174   | 174   | 0    | 0    | 14 |
| PTHR10178:SF14 | 13.34 | 13.34 | 0    | 0    | 14 |
| IPR002701      | 1.49  | 1.6   | 1.52 | 1    | 14 |
| IPR019410      | 4.37  | 6.61  | 1.08 | 0    | 14 |
| IPR015890      | 2.59  | 2.9   | 2.64 | 1.42 | 14 |
| IPR001098      | 1.21  | 2.03  | 1.14 | 0    | 14 |
| IPR019494      | 1.48  | 1.85  | 1.46 | 1.17 | 14 |
| IPR007016      | 1.95  | 1     | 1.95 | 1    | 14 |
| IPR019759      | 3.47  | 3.32  | 3.58 | 1.45 | 14 |
| IPR002495      | 4.09  | 9.32  | 2.06 | 0    | 14 |
| PTHR13712      | 1.45  | 1.67  | 1.29 | 0    | 14 |
| IPR000550      | 1.17  | 1.16  | 1.17 | 1    | 14 |
| IPR001607      | 4.02  | 5.83  | 1.36 | 1    | 14 |
| IPR000904      | 5.98  | 6.45  | 1    | 0    | 14 |
| IPR018164      | 1.38  | 2.74  | 1.23 | 1.76 | 14 |
| IPR000760      | 2.75  | 5.49  | 2.56 | 1.13 | 14 |
| IPR001263      | 3.93  | 3.93  | 0    | 0    | 14 |
| IPR011084      | 2.06  | 2.19  | 0    | 1    | 14 |
| IPR000409      | 5.07  | 5.07  | 0    | 0    | 14 |
| IPR013747      | 2.05  | 18.82 | 1.84 | 1    | 14 |
| IPR020067      | 4.5   | 4.5   | 0    | 0    | 14 |
| IPR017892      | 2.76  | 2.76  | 0    | 0    | 14 |
| IPR004113      | 3.14  | 3.23  | 3.18 | 2.13 | 14 |
| IPR007624      | 2.67  | 8     | 2.61 | 0    | 14 |
| IPR013207      | 7.4   | 3.33  | 7.72 | 0    | 14 |
| IPR002022      | 4.59  | 11.05 | 2.32 | 2    | 14 |
| IPR000738      | 6.5   | 6.5   | 0    | 0    | 14 |
| IPR003121      | 2.7   | 2.7   | 0    | 0    | 14 |
| IPR003123      | 2.4   | 2.4   | 0    | 0    | 14 |
| IPR003673      | 5.39  | 3.22  | 5.88 | 2.31 | 14 |
| PF07320        | 54.71 | 54.71 | 0    | 0    | 14 |
| IPR003709      | 1.41  | 2     | 1.41 | 0    | 14 |
| IPR013036      | 5     | 0     | 5    | 0    | 14 |
| IPR006560      | 2.07  | 2.07  | 0    | 0    | 14 |
| IPR006564      | 30    | 30    | 0    | 0    | 14 |
| IPR003111      | 1.82  | 3.54  | 1.64 | 1    | 14 |
| IPR013693      | 1.63  | 0     | 1.63 | 0    | 14 |
| IPR009739      | 2.06  | 0     | 2.06 | 0    | 14 |
| IPR002744      | 1.78  | 1.63  | 1.82 | 1.62 | 14 |
| PF00054        | 1.2   | 1.2   | 0    | 0    | 14 |
| IPR007312      | 3.48  | 4.25  | 3.43 | 1.5  | 14 |
| IPR002861      | 4.67  | 5.03  | 1    | 1    | 14 |
| IPR001774      | 4.41  | 4.41  | 0    | 0    | 14 |



|           |        |        |       |      |    |
|-----------|--------|--------|-------|------|----|
| IPR017978 | 11.97  | 12.64  | 1     | 0    | 14 |
| IPR007641 | 1.24   | 3.67   | 1.02  | 1    | 14 |
| IPR007645 | 1.23   | 3.56   | 1.02  | 1    | 14 |
| PF02239   | 1.94   | 1      | 2     | 1.6  | 14 |
| IPR004792 | 1.44   | 1.73   | 1.44  | 1.25 | 14 |
| IPR000121 | 2.16   | 2.33   | 2.21  | 1.32 | 14 |
| IPR008915 | 2.03   | 2.11   | 1.99  | 2.48 | 14 |
| IPR006166 | 1.96   | 2.93   | 1.09  | 1.02 | 14 |
| IPR007696 | 1.91   | 5.11   | 1.57  | 1.4  | 14 |
| IPR007693 | 1.3    | 1      | 1.3   | 0    | 14 |
| IPR000374 | 1.42   | 2.91   | 1.27  | 1.45 | 14 |
| IPR005818 | 6.55   | 6.63   | 1     | 0    | 14 |
| IPR015882 | 2.31   | 2.78   | 1.96  | 1    | 14 |
| IPR014020 | 4.36   | 4.36   | 0     | 0    | 14 |
| IPR004107 | 2.96   | 2      | 3.03  | 1.43 | 14 |
| IPR013976 | 3.95   | 1      | 3.98  | 0    | 14 |
| IPR013974 | 2.33   | 1.2    | 2.41  | 1.07 | 14 |
| IPR008968 | 6.43   | 6.43   | 0     | 0    | 14 |
| IPR001804 | 2.66   | 6.75   | 2.23  | 2.05 | 14 |
| IPR009543 | 1.89   | 1.89   | 0     | 0    | 14 |
| IPR002579 | 1.4    | 2.17   | 1.32  | 1.11 | 14 |
| IPR006992 | 3.49   | 4.47   | 3.4   | 2.81 | 14 |
| IPR000348 | 6.72   | 6.87   | 1     | 1    | 14 |
| IPR002646 | 1.54   | 1.71   | 1.53  | 1    | 14 |
| IPR013708 | 1.51   | 2.55   | 1.48  | 1    | 14 |
| TIGR02232 | 24     | 1.5    | 54    | 0    | 14 |
| IPR006139 | 3.98   | 6.64   | 3.82  | 2.09 | 14 |
| IPR003245 | 46.11  | 46.11  | 0     | 0    | 14 |
| PTHR10098 | 1.97   | 1.43   | 2.1   | 0    | 14 |
| PTHR11439 | 26.29  | 26.29  | 0     | 0    | 14 |
| IPR004158 | 74.43  | 74.43  | 0     | 0    | 14 |
| IPR004159 | 42.71  | 42.71  | 0     | 0    | 14 |
| IPR002935 | 1.78   | 3.9    | 1.52  | 1    | 14 |
| IPR011320 | 1.92   | 3.24   | 1.04  | 1    | 14 |
| IPR004240 | 4.82   | 4.82   | 0     | 0    | 14 |
| PF10591   | 3.92   | 3.98   | 1     | 0    | 14 |
| PF09924   | 1.2    | 1.32   | 1.19  | 1.14 | 14 |
| IPR005269 | 1.64   | 3.95   | 1.52  | 1    | 14 |
| IPR002305 | 2.44   | 4.78   | 2.22  | 2.17 | 14 |
| IPR001585 | 1.49   | 1.84   | 1.46  | 1    | 14 |
| IPR006108 | 4      | 3.88   | 4     | 4.38 | 14 |
| TIGR03501 | 1.25   | 0      | 1.25  | 0    | 14 |
| IPR017881 | 1.11   | 1.5    | 1.1   | 0    | 13 |
| PF03712   | 3.02   | 3.06   | 2.88  | 0    | 13 |
| IPR001330 | 8.22   | 18.41  | 2.68  | 1    | 13 |
| IPR013955 | 2.32   | 2.49   | 0     | 1.33 | 13 |
| IPR004088 | 1.04   | 1.36   | 1.03  | 1    | 13 |
| IPR013651 | 1.79   | 1.21   | 1.75  | 2.69 | 13 |
| PF03188   | 2.77   | 2.96   | 1     | 1    | 13 |
| IPR007863 | 4.06   | 10.89  | 3.33  | 1.2  | 13 |
| IPR001986 | 2.19   | 1.53   | 2.29  | 1.02 | 13 |
| IPR001672 | 1.17   | 1.74   | 1.11  | 1    | 13 |
| IPR001012 | 7.51   | 7.51   | 0     | 0    | 13 |
| IPR001732 | 2      | 2.15   | 2     | 1.88 | 13 |
| IPR001537 | 3.57   | 2.53   | 3.8   | 1.02 | 13 |
| PF06458   | 12.86  | 0      | 12.86 | 0    | 13 |
| IPR002492 | 3.3    | 3.9    | 1.14  | 1    | 13 |
| IPR001362 | 1.81   | 5.42   | 1.41  | 1    | 13 |
| IPR019887 | 1.81   | 1      | 1.64  | 2.79 | 13 |
| IPR001608 | 2.74   | 1.97   | 2.84  | 1.14 | 13 |
| IPR000713 | 3.26   | 2      | 3.27  | 0    | 13 |
| IPR013114 | 1.86   | 2.11   | 1.85  | 0    | 13 |
| IPR005174 | 98.67  | 98.67  | 0     | 0    | 13 |
| IPR000697 | 3.75   | 3.75   | 0     | 0    | 13 |
| IPR001765 | 1.77   | 2.87   | 1.68  | 1.14 | 13 |
| IPR000618 | 116.39 | 116.39 | 0     | 0    | 13 |
| IPR003689 | 2.78   | 10.04  | 1.23  | 1.21 | 13 |
| IPR006120 | 1.95   | 1.8    | 1.97  | 1.4  | 13 |
| IPR003032 | 4.7    | 5.92   | 1.5   | 1    | 13 |

|           |       |       |      |      |    |
|-----------|-------|-------|------|------|----|
| IPR000905 | 2     | 2.14  | 2.03 | 1.15 | 13 |
| IPR008859 | 3.17  | 3.36  | 1    | 0    | 13 |
| IPR004148 | 6.03  | 6.03  | 0    | 0    | 13 |
| IPR003395 | 3.32  | 7.59  | 2.94 | 1.98 | 13 |
| IPR006633 | 1.77  | 2.54  | 1.58 | 1.75 | 13 |
| IPR000857 | 6.3   | 6.44  | 0    | 1    | 13 |
| IPR001750 | 6.52  | 20.32 | 5.21 | 4.52 | 13 |
| IPR007695 | 1.28  | 3.43  | 1.03 | 1.43 | 13 |
| IPR011994 | 1.03  | 1     | 1.03 | 1    | 13 |
| IPR000537 | 2.87  | 3.96  | 2.74 | 3.17 | 13 |
| IPR004092 | 13.11 | 13.11 | 0    | 0    | 13 |
| IPR014774 | 2.51  | 1.14  | 2.15 | 4.53 | 13 |
| IPR022041 | 2.46  | 2.73  | 1    | 0    | 13 |
| IPR006598 | 3.89  | 5.02  | 1.05 | 0    | 13 |
| IPR010277 | 1.83  | 1     | 1.84 | 1    | 13 |
| IPR002500 | 2.21  | 1.99  | 2.27 | 1.93 | 13 |
| IPR001060 | 6.45  | 6.45  | 0    | 0    | 13 |
| IPR009970 | 1.02  | 1     | 1.02 | 0    | 13 |
| PF02309   | 58.14 | 58.14 | 0    | 0    | 13 |
| IPR002559 | 8.31  | 3.71  | 8.44 | 9.22 | 13 |
| TIGR02481 | 1.74  | 1     | 1.75 | 0    | 13 |
| IPR003352 | 6.97  | 1     | 6.99 | 0    | 13 |
| PF01936   | 1.6   | 2.19  | 1.56 | 1.65 | 13 |
| IPR003838 | 8.5   | 3.14  | 8.86 | 2.93 | 13 |
| IPR003731 | 2.6   | 0     | 2.63 | 2.45 | 13 |
| IPR003733 | 1.51  | 1.34  | 1.53 | 1.05 | 13 |
| IPR000197 | 4.28  | 4.28  | 0    | 0    | 13 |
| IPR013264 | 1.09  | 0     | 1.09 | 0    | 13 |
| IPR006685 | 3.32  | 3.84  | 3.29 | 3.33 | 13 |
| IPR011608 | 7.74  | 0     | 7.74 | 0    | 13 |
| IPR006011 | 5.4   | 5.51  | 1    | 1    | 13 |
| IPR000756 | 5.45  | 5.98  | 1    | 0    | 13 |
| PTHR11389 | 11.54 | 11.84 | 0    | 1    | 13 |
| IPR003149 | 1.8   | 1.84  | 1.78 | 0    | 13 |
| IPR018980 | 11.71 | 11.71 | 0    | 0    | 13 |
| IPR008274 | 5.72  | 4.74  | 5.87 | 5.67 | 13 |
| IPR014026 | 2.03  | 2.23  | 2.02 | 1.95 | 13 |
| IPR010611 | 1.46  | 1.5   | 1.46 | 0    | 13 |
| SM00864   | 2     | 9.74  | 1.06 | 2.81 | 13 |
| IPR013977 | 2.07  | 3.33  | 1.94 | 1.4  | 13 |
| IPR002483 | 2.76  | 2.76  | 0    | 0    | 13 |
| IPR010715 | 1.69  | 0     | 1.69 | 0    | 13 |
| IPR000721 | 5.8   | 5.8   | 0    | 0    | 13 |
| IPR003135 | 1.52  | 1.2   | 1.55 | 1.38 | 13 |
| IPR019574 | 1.45  | 1.36  | 1.47 | 1    | 13 |
| PF05154   | 1.71  | 3.52  | 1.51 | 1.44 | 13 |
| PTHR12558 | 1.16  | 1.25  | 1.11 | 0    | 13 |
| IPR006132 | 2.21  | 2.08  | 2.23 | 2.11 | 13 |
| IPR001139 | 2.33  | 2.86  | 2.02 | 0    | 13 |
| IPR005018 | 6.56  | 6.56  | 0    | 0    | 13 |
| IPR002543 | 2.11  | 1     | 2.12 | 1    | 13 |
| IPR002545 | 5.9   | 1.67  | 6    | 3.94 | 13 |
| IPR002547 | 1.99  | 2     | 2.04 | 1.24 | 13 |
| IPR005654 | 1.35  | 1.76  | 1.28 | 0    | 13 |
| IPR000109 | 4.01  | 13.18 | 2.03 | 0    | 13 |
| IPR014790 | 1.11  | 1.81  | 1.04 | 1.14 | 13 |
| IPR000312 | 1.67  | 1.32  | 1.7  | 1.5  | 13 |
| IPR006847 | 1.72  | 1.12  | 1.74 | 0    | 13 |
| IPR002877 | 1.72  | 4.36  | 1.44 | 1.12 | 13 |
| IPR008754 | 2.04  | 2.94  | 1.55 | 0    | 13 |
| PF03267   | 23.71 | 23.71 | 0    | 0    | 12 |
| IPR001506 | 1.48  | 1.77  | 1    | 0    | 12 |
| IPR004160 | 1.74  | 6.71  | 1.2  | 1.39 | 12 |
| IPR002781 | 3.75  | 4.65  | 3.84 | 2.13 | 12 |
| IPR006605 | 2.05  | 2.1   | 1    | 0    | 12 |
| IPR000061 | 4.99  | 4.99  | 0    | 0    | 12 |
| IPR003606 | 3.12  | 3.12  | 0    | 0    | 12 |
| IPR018077 | 1.36  | 1.38  | 1.36 | 0    | 12 |
| IPR003159 | 1.48  | 1.75  | 1.47 | 1    | 12 |

|           |       |       |       |       |    |
|-----------|-------|-------|-------|-------|----|
| IPR004274 | 6.24  | 8.1   | 1.04  | 1     | 12 |
| PTHR23125 | 4.35  | 4.97  | 1     | 0     | 12 |
| IPR001826 | 3.26  | 1     | 3.28  | 0     | 12 |
| TIGR01720 | 2.15  | 0     | 2.15  | 0     | 12 |
| IPR013144 | 4.24  | 4.24  | 0     | 0     | 12 |
| IPR021820 | 36.17 | 36.17 | 0     | 0     | 12 |
| IPR010435 | 1.53  | 2.5   | 1.27  | 0     | 12 |
| IPR004294 | 2.57  | 4.57  | 1.62  | 2.5   | 12 |
| IPR021655 | 5.5   | 1     | 5.91  | 0     | 12 |
| IPR003777 | 1.65  | 0     | 1.66  | 1.14  | 12 |
| IPR017933 | 2.4   | 4.37  | 1.97  | 0     | 12 |
| IPR000058 | 4.64  | 5.2   | 0     | 1.17  | 12 |
| IPR013227 | 42.67 | 42.67 | 0     | 0     | 12 |
| IPR006576 | 3.92  | 3.92  | 0     | 0     | 12 |
| IPR006905 | 2.66  | 1.92  | 2.88  | 1     | 12 |
| IPR001875 | 10.08 | 10.08 | 0     | 0     | 12 |
| IPR020829 | 1.82  | 3.01  | 1.73  | 1.16  | 12 |
| IPR005630 | 10.95 | 25.1  | 2.21  | 0     | 12 |
| IPR003104 | 5.67  | 5.67  | 0     | 0     | 12 |
| IPR003105 | 4.97  | 5.22  | 1     | 0     | 12 |
| IPR016093 | 8.71  | 9.1   | 1     | 0     | 12 |
| IPR003349 | 3.83  | 3.83  | 0     | 0     | 12 |
| IPR000867 | 9.06  | 9.06  | 0     | 0     | 12 |
| IPR007831 | 2.11  | 1     | 2.11  | 1     | 12 |
| IPR000331 | 4.55  | 4.55  | 0     | 0     | 12 |
| IPR001762 | 6.81  | 6.53  | 11.33 | 0     | 12 |
| IPR010095 | 6.73  | 7     | 6.2   | 10.13 | 12 |
| PF11987   | 1.12  | 2.33  | 1.01  | 1     | 12 |
| IPR008775 | 2.95  | 3.81  | 2.7   | 1     | 12 |
| IPR007658 | 64    | 64    | 0     | 0     | 12 |
| IPR006085 | 3.4   | 4.81  | 0     | 1.02  | 12 |
| IPR000277 | 3.2   | 4.21  | 3.17  | 1.62  | 12 |
| IPR004042 | 1.14  | 0     | 1.13  | 1.17  | 12 |
| IPR000560 | 3.78  | 6.99  | 1.37  | 0     | 12 |
| IPR004119 | 10.71 | 27.92 | 1.32  | 0     | 12 |
| IPR005644 | 3.99  | 2     | 4     | 0     | 12 |
| IPR007275 | 3.87  | 4.02  | 1     | 1     | 12 |
| IPR017459 | 1.8   | 1.42  | 1.84  | 1.5   | 12 |
| IPR014818 | 1.38  | 7     | 1.35  | 1     | 12 |
| IPR004680 | 2.2   | 4.27  | 2.12  | 1.41  | 12 |
| IPR018765 | 1.56  | 0     | 1.46  | 1.73  | 12 |
| IPR001597 | 1.5   | 1.97  | 1.43  | 1.33  | 12 |
| IPR008269 | 2.58  | 2.41  | 2.64  | 1.68  | 12 |
| IPR001388 | 6.77  | 6.77  | 0     | 0     | 12 |
| IPR002880 | 2.41  | 1.28  | 2.23  | 4.46  | 12 |
| IPR017897 | 7.4   | 4.88  | 17.5  | 0     | 12 |
| IPR002023 | 1.96  | 1.39  | 2.05  | 1     | 12 |
| IPR004096 | 1.59  | 0     | 1.57  | 1.69  | 12 |
| PF07669   | 1.55  | 0     | 1.57  | 1.23  | 12 |
| IPR013667 | 1.91  | 0     | 1.91  | 0     | 12 |
| IPR002891 | 1.37  | 1.89  | 1.3   | 1     | 12 |
| IPR009042 | 2.11  | 2     | 2.11  | 0     | 12 |
| IPR018997 | 1.81  | 1.85  | 1     | 0     | 12 |
| IPR005323 | 1.72  | 1     | 1.74  | 0     | 12 |
| PF09848   | 1.28  | 3.14  | 1.18  | 1.25  | 12 |
| PF04265   | 1.09  | 1.39  | 1     | 0     | 12 |
| IPR000788 | 1.58  | 1.4   | 1.6   | 1.59  | 12 |
| IPR015793 | 1.63  | 3.85  | 1.4   | 1     | 12 |
| PF02176   | 4.46  | 4.46  | 0     | 0     | 12 |
| IPR002550 | 2.1   | 2.71  | 2.05  | 2.06  | 12 |
| IPR007685 | 1.91  | 4.13  | 1.86  | 0     | 12 |
| IPR003501 | 4.97  | 1     | 5     | 0     | 12 |
| IPR003834 | 1.78  | 2.12  | 1.78  | 1.68  | 12 |
| IPR005843 | 2.69  | 3.45  | 2.65  | 1.96  | 12 |
| IPR005846 | 2.78  | 3.42  | 2.77  | 1.87  | 12 |
| IPR003737 | 2.06  | 1.51  | 2.21  | 1.35  | 12 |
| IPR005106 | 1.47  | 1.4   | 1.46  | 1.67  | 12 |
| IPR011115 | 1.18  | 2.85  | 1.16  | 0     | 12 |
| IPR011662 | 2.97  | 2     | 2.98  | 0     | 12 |

|                |       |       |      |      |    |
|----------------|-------|-------|------|------|----|
| IPR001320      | 19.9  | 19.9  | 0    | 0    | 12 |
| PTHR21180      | 1.17  | 1     | 1.17 | 1.25 | 12 |
| IPR004265      | 37.88 | 43.14 | 1    | 0    | 12 |
| IPR002694      | 1.15  | 0     | 1.15 | 0    | 12 |
| IPR011683      | 1.34  | 1.33  | 1.35 | 1    | 12 |
| IPR008914      | 2     | 5.53  | 1.35 | 1.24 | 12 |
| IPR018982      | 1.16  | 1.8   | 1.06 | 1.17 | 12 |
| IPR003495      | 3.06  | 3.38  | 3.09 | 1.86 | 12 |
| IPR013050      | 2.41  | 2.79  | 1    | 1    | 12 |
| IPR007694      | 1.35  | 1.42  | 1.35 | 0    | 12 |
| IPR003533      | 6.58  | 6.58  | 0    | 0    | 12 |
| IPR002611      | 1.7   | 1     | 1.7  | 1    | 12 |
| IPR000490      | 9.48  | 15.32 | 1.15 | 0    | 12 |
| IPR000233      | 8.3   | 8.3   | 0    | 0    | 12 |
| IPR010618      | 2.54  | 0     | 2.54 | 0    | 12 |
| IPR004104      | 3.76  | 2.66  | 3.97 | 2.34 | 12 |
| IPR004103      | 1.43  | 1     | 1.46 | 1    | 12 |
| IPR005046      | 7.06  | 40    | 6.06 | 0    | 12 |
| IPR020561      | 1.09  | 1.3   | 1.07 | 1.02 | 12 |
| IPR007235      | 1.52  | 1.69  | 1.52 | 1.16 | 12 |
| IPR018444      | 3.8   | 3.8   | 0    | 0    | 12 |
| IPR006913      | 3.75  | 6.53  | 3.29 | 0    | 12 |
| IPR001096      | 1.8   | 2.22  | 1.15 | 1    | 12 |
| IPR009291      | 2.69  | 2.93  | 1    | 0    | 12 |
| IPR000726      | 2.65  | 14.45 | 1.41 | 0    | 12 |
| IPR002379      | 1.96  | 8.32  | 1.26 | 1.49 | 12 |
| IPR003130      | 4.36  | 4.36  | 0    | 0    | 12 |
| IPR005330      | 3.84  | 1.67  | 4.01 | 0    | 12 |
| PTHR19959:SF16 | 2.33  | 2.92  | 2.19 | 1    | 12 |
| IPR003714      | 1.53  | 1     | 1.53 | 1    | 12 |
| IPR006131      | 2.2   | 1.95  | 2.22 | 2.13 | 12 |
| IPR006070      | 1.79  | 1.39  | 1.84 | 1.65 | 12 |
| IPR003790      | 1.6   | 0     | 1.6  | 1    | 12 |
| IPR005201      | 1.27  | 1.47  | 1.03 | 0    | 12 |
| IPR002932      | 1.66  | 1.55  | 1.69 | 1.36 | 12 |
| IPR019087      | 2.65  | 2.65  | 0    | 0    | 12 |
| IPR002192      | 1.64  | 3.84  | 1.57 | 1.57 | 12 |
| IPR002789      | 1.69  | 0     | 1.47 | 2.91 | 11 |
| IPR013957      | 1.41  | 1.41  | 0    | 0    | 11 |
| IPR007577      | 2.72  | 4.39  | 1.32 | 0    | 11 |
| PF10996        | 1.72  | 3.27  | 1.18 | 1.93 | 11 |
| IPR005066      | 1.9   | 2.5   | 1.69 | 1.33 | 11 |
| IPR003608      | 1.46  | 1.46  | 0    | 0    | 11 |
| IPR012480      | 1.39  | 1.5   | 1.39 | 1    | 11 |
| IPR001162      | 1.03  | 1     | 1.03 | 1    | 11 |
| IPR003390      | 1.3   | 0     | 1.3  | 1.23 | 11 |
| IPR000156      | 4.85  | 4.85  | 0    | 0    | 11 |
| IPR007860      | 1.3   | 3.78  | 1.03 | 1.43 | 11 |
| IPR000589      | 1.14  | 2.41  | 1.02 | 1    | 11 |
| PF08645        | 1.14  | 1.19  | 1.13 | 0    | 11 |
| IPR018990      | 1.27  | 2.33  | 1.06 | 2.08 | 11 |
| IPR001907      | 1.92  | 3.12  | 1.84 | 1    | 11 |
| IPR001017      | 2.78  | 5.18  | 2.55 | 1.5  | 11 |
| IPR000971      | 2.02  | 5.65  | 1.23 | 1    | 11 |
| IPR016044      | 16.14 | 16.14 | 0    | 0    | 11 |
| IPR013720      | 2.28  | 2.28  | 0    | 0    | 11 |
| PF11614        | 1.38  | 1     | 1.39 | 1    | 11 |
| IPR010606      | 5.5   | 5.5   | 0    | 0    | 11 |
| PF08214        | 1.39  | 1.39  | 0    | 0    | 11 |
| PF11790        | 1.48  | 2.08  | 1.13 | 1    | 11 |
| IPR004300      | 1.71  | 0     | 1.63 | 2.16 | 11 |
| PTHR10891      | 2.03  | 3.17  | 1.09 | 0    | 11 |
| IPR007195      | 1.05  | 0     | 1.05 | 0    | 11 |
| IPR005480      | 1.15  | 1.72  | 1.11 | 1.05 | 11 |
| IPR016288      | 1.66  | 1.69  | 1.65 | 0    | 11 |
| IPR000699      | 5.1   | 5.1   | 0    | 0    | 11 |
| IPR009722      | 1.6   | 2     | 1.6  | 0    | 11 |
| IPR002755      | 1.44  | 1.18  | 1.62 | 1.04 | 11 |
| IPR012947      | 2.4   | 3.78  | 2.3  | 1.91 | 11 |

|           |       |       |       |      |    |
|-----------|-------|-------|-------|------|----|
| IPR001938 | 11.57 | 19.06 | 1.58  | 0    | 11 |
| IPR003721 | 1.04  | 1.14  | 1.04  | 0    | 11 |
| PTHR23241 | 1.39  | 1.72  | 1.06  | 0    | 11 |
| IPR008395 | 6.76  | 7.12  | 1     | 0    | 11 |
| IPR006086 | 3.78  | 5.42  | 0     | 1.02 | 11 |
| IPR001351 | 1.08  | 1.74  | 1.01  | 1    | 11 |
| IPR004701 | 2.11  | 0     | 2.12  | 1    | 11 |
| IPR013129 | 1.39  | 1.41  | 1     | 0    | 11 |
| IPR006635 | 6.17  | 0     | 6.17  | 0    | 11 |
| IPR018484 | 3.41  | 4.58  | 3.33  | 1.67 | 11 |
| IPR012970 | 1.43  | 1     | 1.45  | 1    | 11 |
| IPR007330 | 3.83  | 4.31  | 0     | 1    | 11 |
| IPR004020 | 13.33 | 13.33 | 0     | 0    | 11 |
| IPR005087 | 1.93  | 0     | 2     | 1    | 11 |
| IPR010309 | 1.32  | 1.32  | 0     | 0    | 11 |
| PF10503   | 1.77  | 1.75  | 1.77  | 0    | 11 |
| IPR000640 | 3.75  | 7.2   | 3.57  | 1    | 11 |
| IPR002100 | 11.62 | 11.76 | 1     | 0    | 11 |
| IPR004443 | 1.1   | 1.7   | 1.02  | 1    | 11 |
| IPR001967 | 2.49  | 1     | 2.49  | 0    | 11 |
| IPR001962 | 2.03  | 2.77  | 1.91  | 2.17 | 11 |
| PF03534   | 1.48  | 0     | 1.48  | 0    | 11 |
| IPR001563 | 5.59  | 11.93 | 1.69  | 0    | 11 |
| IPR020068 | 8.67  | 8.67  | 0     | 0    | 11 |
| IPR008808 | 17    | 17    | 0     | 0    | 11 |
| IPR005793 | 1.3   | 1.78  | 1.28  | 1    | 11 |
| IPR002225 | 2.07  | 3.66  | 1.08  | 1    | 11 |
| IPR001171 | 2.75  | 3     | 1.27  | 0    | 11 |
| IPR002731 | 2.04  | 1.29  | 2.16  | 1.79 | 11 |
| IPR014821 | 2.87  | 2.87  | 0     | 0    | 11 |
| IPR005698 | 2.01  | 1     | 2.02  | 1    | 11 |
| IPR002501 | 1.13  | 2.31  | 1.02  | 1    | 11 |
| PF05598   | 3.76  | 1.25  | 3.82  | 3.2  | 11 |
| IPR013822 | 2.02  | 2.36  | 2     | 1.85 | 11 |
| IPR003128 | 5.18  | 5.18  | 0     | 0    | 11 |
| IPR004776 | 2.03  | 4.63  | 1.73  | 1.12 | 11 |
| IPR012921 | 2.69  | 2.69  | 0     | 0    | 11 |
| PF05203   | 1.06  | 1     | 1.07  | 0    | 11 |
| IPR006140 | 1.63  | 2.55  | 1.52  | 1    | 11 |
| IPR018711 | 1.35  | 2     | 1.34  | 0    | 11 |
| IPR001708 | 1.31  | 2.56  | 1.2   | 0    | 11 |
| IPR014757 | 5.63  | 1.67  | 5.69  | 3.6  | 11 |
| IPR004124 | 1.42  | 0     | 1.42  | 0    | 11 |
| PTHR11938 | 1.32  | 1     | 1.32  | 1.5  | 11 |
| IPR013894 | 1.48  | 1.48  | 0     | 0    | 11 |
| IPR002941 | 2.48  | 1.5   | 2.51  | 2.09 | 11 |
| IPR008619 | 10.21 | 0     | 10.21 | 0    | 11 |
| IPR003358 | 1.18  | 1.72  | 1.12  | 1    | 11 |
| IPR002319 | 1.24  | 2.92  | 1.05  | 1.61 | 11 |
| IPR019453 | 2.06  | 2.07  | 1     | 0    | 11 |
| IPR015374 | 1.24  | 1.47  | 1.05  | 0    | 11 |
| IPR009880 | 3     | 4.17  | 1.11  | 0    | 11 |
| IPR006688 | 8.69  | 8.79  | 0     | 1    | 11 |
| IPR010766 | 1.21  | 1     | 1.21  | 1.14 | 11 |
| IPR002913 | 6.32  | 10.24 | 1.32  | 0    | 11 |
| IPR003388 | 5.6   | 5.67  | 1     | 0    | 11 |
| IPR008918 | 1.99  | 3.4   | 1     | 1.02 | 11 |
| IPR010294 | 6.81  | 6.81  | 0     | 0    | 11 |
| IPR000653 | 2.63  | 1.67  | 2.7   | 1.69 | 11 |
| IPR014730 | 3.41  | 2.12  | 3.59  | 3.68 | 11 |
| IPR009463 | 1.93  | 1.93  | 0     | 0    | 11 |
| IPR002037 | 1.18  | 1     | 1.18  | 0    | 11 |
| IPR011538 | 1.92  | 1.49  | 1.98  | 1    | 11 |
| IPR013979 | 2.18  | 2.49  | 1     | 0    | 11 |
| PTHR10887 | 1.46  | 2.07  | 1.13  | 1    | 11 |
| IPR006045 | 7.96  | 25.28 | 2.09  | 1    | 11 |
| IPR010693 | 2.05  | 0     | 2.12  | 1.33 | 11 |
| PF03205   | 1.22  | 1.83  | 1.08  | 1.37 | 11 |
| IPR003402 | 1.89  | 1.93  | 1.07  | 2.33 | 11 |

|           |       |       |      |      |    |
|-----------|-------|-------|------|------|----|
| IPR006915 | 1.94  | 0     | 1.94 | 0    | 11 |
| IPR015330 | 1.57  | 1     | 1.59 | 1.2  | 11 |
| TIGR03142 | 1.04  | 0     | 1.04 | 0    | 11 |
| IPR000682 | 1.76  | 2.23  | 1.76 | 1.12 | 11 |
| IPR003817 | 1.3   | 2.48  | 1.16 | 1    | 11 |
| IPR012939 | 2.53  | 3.04  | 2.39 | 0    | 11 |
| IPR007807 | 1.36  | 1.28  | 1.39 | 1.42 | 11 |
| IPR003690 | 12.29 | 12.29 | 0    | 0    | 11 |
| IPR005331 | 2.74  | 5.17  | 1.75 | 0    | 11 |
| IPR005334 | 3.24  | 3.24  | 0    | 0    | 11 |
| IPR005599 | 3.52  | 3.85  | 1.11 | 0    | 11 |
| IPR002143 | 1.25  | 3.61  | 1.02 | 1    | 11 |
| IPR006133 | 1.89  | 3.84  | 1    | 1.54 | 11 |
| IPR001079 | 10.02 | 10.2  | 1    | 0    | 11 |
| IPR005517 | 1.85  | 4.47  | 1.65 | 1    | 11 |
| IPR013540 | 1.52  | 0     | 1.52 | 0    | 11 |
| IPR003000 | 1.85  | 5.33  | 1.33 | 1.2  | 11 |
| PTHR23154 | 6.76  | 11.52 | 1.24 | 0    | 11 |
| IPR018497 | 3.36  | 11.4  | 1.53 | 1    | 11 |
| IPR006380 | 1.89  | 8.56  | 1.2  | 0    | 11 |
| IPR000184 | 2.36  | 1.97  | 2.41 | 0    | 11 |
| IPR007903 | 2.07  | 1.5   | 2.06 | 2.57 | 10 |
| IPR002474 | 1.13  | 1.85  | 1.07 | 1.03 | 10 |
| IPR003150 | 2.02  | 2.04  | 1    | 0    | 10 |
| IPR019378 | 6.24  | 6.46  | 1    | 0    | 10 |
| IPR005545 | 2.49  | 1.55  | 2.54 | 1    | 10 |
| IPR002014 | 2.68  | 2.71  | 1    | 0    | 10 |
| IPR011613 | 1.72  | 2     | 1.57 | 2.9  | 10 |
| IPR005034 | 2.42  | 2.42  | 0    | 0    | 10 |
| IPR003399 | 5.34  | 1.75  | 5.4  | 0    | 10 |
| IPR007259 | 5.37  | 5.37  | 0    | 0    | 10 |
| IPR015413 | 1.61  | 3.24  | 1.45 | 1.78 | 10 |
| IPR003585 | 4.76  | 4.76  | 0    | 0    | 10 |
| IPR004009 | 5.17  | 5.17  | 0    | 0    | 10 |
| IPR002514 | 5.1   | 1.67  | 5.15 | 0    | 10 |
| PTHR23213 | 1.64  | 2     | 1.17 | 0    | 10 |
| PF01217   | 9.12  | 9.12  | 0    | 0    | 10 |
| IPR006157 | 1.22  | 1.69  | 1.19 | 1    | 10 |
| IPR001900 | 1.56  | 2.99  | 1.4  | 1.09 | 10 |
| IPR001906 | 61.43 | 61.43 | 0    | 0    | 10 |
| IPR014977 | 20.62 | 20.62 | 0    | 0    | 10 |
| IPR003779 | 3.57  | 1.65  | 3.75 | 2.33 | 10 |
| IPR001280 | 2.55  | 5.89  | 1.89 | 0    | 10 |
| IPR013596 | 33.17 | 33.17 | 0    | 0    | 10 |
| IPR013598 | 4.73  | 4.78  | 1    | 0    | 10 |
| IPR001099 | 3.39  | 17.13 | 1.31 | 0    | 10 |
| PF03934   | 1.44  | 1     | 1.44 | 0    | 10 |
| IPR002498 | 3.06  | 3.06  | 0    | 0    | 10 |
| IPR004968 | 3.94  | 223   | 1.27 | 1    | 10 |
| IPR002529 | 3.88  | 3.83  | 4.02 | 1.91 | 10 |
| IPR007225 | 1.48  | 1.48  | 0    | 0    | 10 |
| PF12169   | 1.07  | 5.43  | 1.03 | 0    | 10 |
| IPR007529 | 3.7   | 3.85  | 0    | 1    | 10 |
| IPR005175 | 2.23  | 22.8  | 1.08 | 1.1  | 10 |
| IPR001873 | 24.41 | 24.41 | 0    | 0    | 10 |
| IPR013688 | 5     | 0     | 5    | 0    | 10 |
| IPR006822 | 1.25  | 1.34  | 1    | 0    | 10 |
| IPR010359 | 2.09  | 0     | 2.1  | 1    | 10 |
| IPR008528 | 4.05  | 4.05  | 0    | 0    | 10 |
| IPR011121 | 4.83  | 0     | 4.83 | 0    | 10 |
| IPR005139 | 1.97  | 1.84  | 1.98 | 0    | 10 |
| IPR010090 | 1.48  | 1     | 1.48 | 1    | 10 |
| IPR019196 | 1.19  | 1.29  | 1.16 | 1.4  | 10 |
| PTHR22939 | 1.49  | 2.5   | 1.32 | 0    | 10 |
| IPR021097 | 1.38  | 1.38  | 0    | 0    | 10 |
| IPR007492 | 2.83  | 2.33  | 2.83 | 0    | 10 |
| IPR013632 | 2.66  | 2.88  | 0    | 1.62 | 10 |
| IPR004147 | 2.07  | 5.66  | 1.65 | 1.17 | 10 |
| PTHR10432 | 1.38  | 1.46  | 1    | 0    | 10 |

|                |       |       |      |      |    |
|----------------|-------|-------|------|------|----|
| IPR005000      | 2.87  | 2.54  | 2.99 | 1.26 | 10 |
| IPR001492      | 3.33  | 1.5   | 3.34 | 0    | 10 |
| IPR011432      | 2.73  | 0     | 2.73 | 0    | 10 |
| IPR006636      | 5.72  | 5.72  | 0    | 0    | 10 |
| IPR001842      | 1.44  | 2.67  | 1.12 | 0    | 10 |
| IPR018481      | 1.84  | 1.25  | 1.93 | 1.12 | 10 |
| IPR011083      | 2.26  | 0     | 2.26 | 0    | 10 |
| IPR004026      | 1.2   | 1.21  | 1.2  | 1    | 10 |
| IPR004022      | 1.95  | 1.95  | 0    | 0    | 10 |
| IPR021800      | 1.47  | 0     | 1.47 | 0    | 10 |
| IPR008883      | 1.65  | 1.65  | 0    | 0    | 10 |
| IPR008180      | 1.53  | 1.66  | 1.51 | 1.67 | 10 |
| IPR003759      | 1.25  | 1.44  | 1.21 | 2.43 | 10 |
| IPR000489      | 1.87  | 1.23  | 1.95 | 1.32 | 10 |
| IPR000534      | 2.5   | 2.52  | 2.51 | 2.17 | 10 |
| IPR004835      | 2.85  | 3.62  | 1.04 | 1    | 10 |
| IPR012319      | 1.41  | 1.58  | 1.4  | 1    | 10 |
| IPR001305      | 1.48  | 4.87  | 1.13 | 1.21 | 10 |
| IPR013089      | 1.85  | 2.1   | 1    | 1    | 10 |
| PTHR11201      | 1.62  | 1.62  | 0    | 0    | 10 |
| IPR004095      | 2.27  | 3.45  | 2.14 | 2.24 | 10 |
| IPR006032      | 1.14  | 2.35  | 1.02 | 1.02 | 10 |
| IPR022045      | 1.52  | 0     | 1.52 | 0    | 10 |
| IPR020576      | 1.65  | 4.3   | 1.2  | 0    | 10 |
| IPR006593      | 5.09  | 5.47  | 1    | 1    | 10 |
| IPR013662      | 2.53  | 2.53  | 0    | 0    | 10 |
| IPR002504      | 1.46  | 3.21  | 1.27 | 1.93 | 10 |
| IPR020803      | 1     | 0     | 1    | 0    | 10 |
| IPR018712      | 1.94  | 3.67  | 1.46 | 0    | 10 |
| IPR006750      | 2.05  | 1     | 2.06 | 1    | 10 |
| IPR002420      | 2.81  | 2.81  | 0    | 0    | 10 |
| IPR009361      | 1.22  | 1.22  | 0    | 0    | 10 |
| PFO2927        | 1.68  | 0     | 1.69 | 1    | 10 |
| IPR008816      | 2.63  | 1.23  | 2.74 | 1    | 10 |
| TIGR01494      | 3.24  | 8.2   | 1.17 | 1.27 | 10 |
| IPR000020      | 10.1  | 10.1  | 0    | 0    | 10 |
| IPR000026      | 1.21  | 2.07  | 1.09 | 1    | 10 |
| IPR013235      | 1.33  | 1.33  | 0    | 0    | 10 |
| IPR006566      | 31.17 | 31.17 | 0    | 0    | 10 |
| IPR007214      | 2.3   | 2.04  | 2.33 | 1    | 10 |
| IPR001370      | 6.17  | 6.17  | 0    | 0    | 10 |
| PFO4685        | 1.62  | 2.4   | 1.15 | 2.75 | 10 |
| IPR000547      | 9.31  | 9.31  | 0    | 0    | 10 |
| IPR007737      | 3.01  | 1     | 3.02 | 0    | 10 |
| IPR003116      | 5.96  | 5.96  | 0    | 0    | 10 |
| IPR013101      | 20.55 | 20.55 | 0    | 0    | 10 |
| IPR018929      | 1.92  | 0     | 1.92 | 0    | 10 |
| IPR007822      | 1.96  | 1.95  | 1.98 | 1    | 10 |
| IPR021369      | 2.7   | 2.7   | 0    | 0    | 10 |
| IPR000323      | 3.16  | 3.24  | 2.5  | 0    | 10 |
| IPR018500      | 2.23  | 2.23  | 0    | 0    | 10 |
| IPR000426      | 5.63  | 8.32  | 0    | 1.11 | 10 |
| IPR000422      | 1.29  | 1.53  | 1.29 | 1.02 | 10 |
| IPR005474      | 2.64  | 2.36  | 2.73 | 1    | 10 |
| IPR001944      | 3.54  | 6.25  | 1.53 | 1.5  | 10 |
| IPR005534      | 1.18  | 1     | 1.18 | 0    | 10 |
| IPR007050      | 6.7   | 0     | 1    | 7.16 | 10 |
| IPR012960      | 1.15  | 1.26  | 1    | 1    | 10 |
| IPR004038      | 3.18  | 7.52  | 1.45 | 1.87 | 10 |
| IPR010314      | 1.35  | 1.35  | 0    | 0    | 10 |
| IPR014731      | 1.76  | 1.11  | 1.84 | 1.84 | 10 |
| IPR013057      | 17.26 | 18.5  | 1.2  | 1    | 10 |
| IPR004455      | 1.72  | 2.89  | 1.62 | 1.44 | 10 |
| IPR001029      | 2.84  | 1.67  | 2.85 | 0    | 10 |
| PTHR11938:SF10 | 1.59  | 1     | 1.62 | 1.25 | 10 |
| IPR002404      | 5.29  | 5.29  | 0    | 0    | 10 |
| IPR009460      | 1.71  | 1.71  | 0    | 0    | 10 |
| IPR005561      | 2.22  | 0     | 2.22 | 0    | 10 |
| IPR006581      | 2.83  | 2.83  | 0    | 0    | 10 |

|           |       |       |      |      |    |
|-----------|-------|-------|------|------|----|
| IPR001807 | 2.31  | 5.04  | 1.96 | 1.17 | 10 |
| IPR001808 | 2.65  | 1     | 2.7  | 1.06 | 10 |
| IPR002573 | 2.1   | 2.89  | 1.43 | 0    | 10 |
| IPR003337 | 1.88  | 5.27  | 1.16 | 1.14 | 10 |
| IPR007372 | 2.07  | 1     | 2.08 | 0    | 10 |
| IPR008753 | 3.49  | 12.2  | 1.51 | 1    | 10 |
| IPR011072 | 3.98  | 3.98  | 0    | 0    | 10 |
| IPR000034 | 2.22  | 2.22  | 0    | 0    | 10 |
| IPR001073 | 7.6   | 14.62 | 1.68 | 0    | 10 |
| IPR010456 | 1.49  | 3.75  | 1.22 | 1.85 | 10 |
| IPR001111 | 9.2   | 10.54 | 2.14 | 0    | 10 |
| IPR006077 | 6.36  | 6.36  | 0    | 0    | 10 |
| IPR000914 | 6.35  | 1.33  | 6.49 | 4.38 | 10 |
| IPR000262 | 1.9   | 4.33  | 1.61 | 1.26 | 10 |
| IPR019103 | 1.75  | 1.84  | 1    | 1    | 10 |
| IPR013625 | 3.08  | 3.08  | 0    | 0    | 10 |
| IPR018028 | 2.08  | 3.45  | 1.87 | 1    | 10 |
| IPR011429 | 2.95  | 0     | 2.95 | 0    | 10 |
| IPR019542 | 3.3   | 3.3   | 0    | 0    | 10 |
| IPR003822 | 6.24  | 6.24  | 0    | 0    | 10 |
| IPR014862 | 1.64  | 0     | 1.64 | 0    | 10 |
| IPR007859 | 1.16  | 1.13  | 1.17 | 1    | 10 |
| IPR007588 | 28.05 | 28.05 | 0    | 0    | 10 |
| IPR013542 | 1.02  | 1     | 1.02 | 0    | 10 |
| IPR005097 | 1.74  | 2.71  | 1.57 | 1.12 | 10 |
| IPR005110 | 1.69  | 1.33  | 1.66 | 2.48 | 10 |
| IPR013332 | 1.81  | 3.63  | 1.7  | 1.12 | 10 |
| IPR001486 | 1.48  | 2.56  | 1.45 | 1    | 10 |
| IPR010466 | 1.64  | 0     | 1.64 | 0    | 10 |
| IPR014905 | 1.6   | 2.29  | 1.13 | 0    | 10 |
| IPR005198 | 2.8   | 4.91  | 1.49 | 1    | 10 |
| IPR000215 | 9.34  | 19.75 | 1.24 | 1.3  | 10 |
| PF10412   | 1.79  | 0     | 1.81 | 1    | 9  |
| IPR005068 | 3.62  | 0     | 3.62 | 0    | 9  |
| IPR011612 | 1.22  | 1.15  | 1.23 | 1    | 9  |
| IPR015865 | 1.03  | 1.18  | 1.02 | 0    | 9  |
| IPR010506 | 1.4   | 1.41  | 1    | 0    | 9  |
| IPR010507 | 6.11  | 9.14  | 1    | 1    | 9  |
| IPR004276 | 1.49  | 3.61  | 1.38 | 1.5  | 9  |
| IPR018910 | 1.03  | 0     | 1.03 | 0    | 9  |
| IPR001674 | 1.04  | 1.21  | 1.03 | 1    | 9  |
| IPR011698 | 2.19  | 1     | 2.18 | 2.38 | 9  |
| IPR002713 | 8.48  | 8.57  | 3    | 0    | 9  |
| IPR002826 | 1.51  | 0     | 1.71 | 1    | 9  |
| IPR007122 | 18.26 | 18.26 | 0    | 0    | 9  |
| IPR007123 | 4.33  | 4.33  | 0    | 0    | 9  |
| IPR003871 | 29.5  | 29.5  | 0    | 0    | 9  |
| IPR006150 | 41    | 41    | 0    | 0    | 9  |
| IPR000361 | 2.41  | 2.37  | 2.44 | 1    | 9  |
| IPR015794 | 1.52  | 3.71  | 1.3  | 1.13 | 9  |
| IPR014978 | 2.91  | 2.91  | 0    | 0    | 9  |
| IPR013497 | 1.33  | 1.56  | 1.28 | 0    | 9  |
| IPR015899 | 1.06  | 2     | 1.05 | 1.33 | 9  |
| PF12354   | 19    | 0     | 19   | 0    | 9  |
| IPR019307 | 1.47  | 1.86  | 1.47 | 1    | 9  |
| IPR006050 | 1.54  | 4.3   | 1.21 | 1.47 | 9  |
| IPR000246 | 1.9   | 4.37  | 1.25 | 1.26 | 9  |
| IPR000241 | 1.22  | 1.3   | 1.16 | 1.76 | 9  |
| PTHR10343 | 2.13  | 2.31  | 1    | 0    | 9  |
| PF03215   | 1.55  | 1.58  | 1    | 0    | 9  |
| IPR002288 | 1.22  | 1     | 1.24 | 0    | 9  |
| IPR001367 | 2.67  | 0     | 2.53 | 3.82 | 9  |
| IPR001604 | 2.16  | 4.96  | 1.32 | 1    | 9  |
| IPR000717 | 13.89 | 13.89 | 0    | 0    | 9  |
| PTHR10032 | 3.31  | 3.39  | 0    | 1    | 9  |
| PF10069   | 1.36  | 0     | 1.4  | 1    | 9  |
| IPR006642 | 2.38  | 2.38  | 0    | 0    | 9  |
| IPR007117 | 28.64 | 39.6  | 1.33 | 1    | 9  |
| IPR001250 | 1.23  | 1.61  | 1.15 | 0    | 9  |



|           |       |       |       |      |   |
|-----------|-------|-------|-------|------|---|
| IPR003807 | 1.99  | 4.78  | 1.37  | 1    | 9 |
| IPR014847 | 7.81  | 7.81  | 0     | 0    | 9 |
| IPR000084 | 37.11 | 0     | 37.11 | 0    | 9 |
| IPR013199 | 1.65  | 1     | 1.77  | 1    | 9 |
| PTHR23244 | 1.91  | 2.17  | 1.1   | 1    | 9 |
| IPR014775 | 4.06  | 4.06  | 0     | 0    | 9 |
| IPR008144 | 1.32  | 1.58  | 1.16  | 0    | 9 |
| IPR008170 | 3.05  | 1     | 2.9   | 5.07 | 9 |
| IPR013937 | 1.97  | 1.97  | 0     | 0    | 9 |
| IPR019835 | 2.23  | 2.77  | 1.41  | 0    | 9 |
| IPR003448 | 1.11  | 1.13  | 1.11  | 1.1  | 9 |
| IPR004146 | 38    | 38    | 0     | 0    | 9 |
| IPR012328 | 3.05  | 12.26 | 1.33  | 0    | 9 |
| IPR011656 | 2     | 2     | 0     | 0    | 9 |
| IPR002928 | 5.54  | 5.54  | 0     | 0    | 9 |
| IPR022096 | 2.29  | 2.29  | 0     | 0    | 9 |
| IPR010525 | 22.88 | 22.88 | 0     | 0    | 9 |
| IPR006630 | 4.36  | 4.36  | 0     | 0    | 9 |
| IPR003374 | 1.48  | 2     | 1.5   | 1.06 | 9 |
| IPR018487 | 23.83 | 25.73 | 3     | 0    | 9 |
| IPR017455 | 1.25  | 1.25  | 0     | 0    | 9 |
| IPR007034 | 2.16  | 2.21  | 0     | 1    | 9 |
| IPR006461 | 8.3   | 8.3   | 0     | 0    | 9 |
| IPR007597 | 2.92  | 0     | 2.91  | 3    | 9 |
| IPR002686 | 2.92  | 0     | 2.91  | 3.07 | 9 |
| IPR010491 | 1.21  | 1.21  | 0     | 0    | 9 |
| IPR010493 | 1.26  | 4.5   | 1.14  | 1    | 9 |
| IPR010499 | 2.58  | 1.5   | 2.62  | 1.47 | 9 |
| IPR007348 | 1.47  | 1     | 1.48  | 1    | 9 |
| PF06337   | 1.48  | 1.48  | 0     | 0    | 9 |
| IPR000387 | 1.52  | 2.68  | 1.23  | 0    | 9 |
| IPR001036 | 7.15  | 8.33  | 7.14  | 0    | 9 |
| IPR008183 | 2.27  | 4.51  | 1.98  | 1    | 9 |
| IPR002881 | 2.09  | 2     | 2.09  | 2.03 | 9 |
| IPR014036 | 4.03  | 1     | 4.06  | 1    | 9 |
| IPR001562 | 4.12  | 4.12  | 0     | 0    | 9 |
| PF03706   | 1.94  | 1     | 1.93  | 2.08 | 9 |
| IPR002020 | 1.97  | 3.31  | 1.84  | 1.3  | 9 |
| PF09337   | 1.43  | 1.43  | 0     | 0    | 9 |
| IPR006592 | 1.5   | 1.69  | 1     | 1    | 9 |
| IPR013668 | 1.02  | 0     | 1.02  | 1    | 9 |
| PF12349   | 1.87  | 1.98  | 1     | 0    | 9 |
| IPR003122 | 2.8   | 1     | 2.81  | 0    | 9 |
| IPR010332 | 1.24  | 0     | 1.25  | 1    | 9 |
| IPR008586 | 15.14 | 15.14 | 0     | 0    | 9 |
| IPR003325 | 4.32  | 1     | 4.36  | 0    | 9 |
| IPR003321 | 1.37  | 0     | 1.37  | 1    | 9 |
| IPR006668 | 1.38  | 1.33  | 1.38  | 1.14 | 9 |
| IPR000889 | 1.66  | 3.06  | 1.41  | 0    | 9 |
| IPR012928 | 2.08  | 0     | 2.18  | 1    | 9 |
| PF05204   | 1.33  | 2     | 1     | 1    | 9 |
| IPR013509 | 1.23  | 1.31  | 1.23  | 1.12 | 9 |
| IPR000352 | 2.67  | 4.03  | 2.55  | 0    | 9 |
| IPR019282 | 1.33  | 0     | 1.33  | 1    | 9 |
| IPR002429 | 2.01  | 3.24  | 1.85  | 2.06 | 9 |
| IPR001544 | 2.52  | 4     | 2.42  | 1.35 | 9 |
| IPR015077 | 1.38  | 1     | 1.42  | 1    | 9 |
| IPR009288 | 1.48  | 2.57  | 1.31  | 1.06 | 9 |
| IPR020546 | 1.15  | 1.42  | 1.12  | 1    | 9 |
| IPR005939 | 1.45  | 0     | 1.45  | 0    | 9 |
| IPR007213 | 2.44  | 2     | 2.64  | 2.17 | 9 |
| IPR013610 | 1.69  | 3     | 1.69  | 1    | 9 |
| PF11490   | 1.07  | 0     | 1.07  | 0    | 9 |
| IPR020974 | 1.94  | 0     | 1.94  | 0    | 9 |
| PTHR10617 | 1.19  | 1     | 1.12  | 1.41 | 9 |
| IPR002059 | 1.53  | 1.62  | 1.51  | 0    | 9 |
| IPR003099 | 1.07  | 1.35  | 1.05  | 1.02 | 9 |
| IPR003112 | 5.11  | 5.11  | 0     | 0    | 9 |
| IPR005105 | 1.43  | 0     | 1.44  | 1    | 9 |

|                |       |       |      |      |   |
|----------------|-------|-------|------|------|---|
| IPR013694      | 1.44  | 2.12  | 1.22 | 0    | 9 |
| IPR014877      | 1.69  | 1.69  | 0    | 0    | 9 |
| PF11598        | 2.42  | 2.42  | 0    | 0    | 9 |
| IPR000425      | 2.8   | 10.12 | 1.7  | 1.09 | 9 |
| IPR007642      | 2     | 2     | 0    | 0    | 9 |
| IPR002627      | 1.18  | 2.7   | 1.05 | 0    | 9 |
| IPR003445      | 1.64  | 3.12  | 1.52 | 1.61 | 9 |
| IPR013093      | 2.29  | 2.1   | 2.52 | 1    | 9 |
| IPR004345      | 5.12  | 5.12  | 0    | 0    | 9 |
| IPR000933      | 2.21  | 1.97  | 2.43 | 1    | 9 |
| IPR004177      | 2.37  | 2.37  | 0    | 0    | 9 |
| IPR004172      | 9.15  | 9.15  | 0    | 0    | 9 |
| IPR020942      | 3.19  | 0     | 3.19 | 0    | 9 |
| IPR002004      | 2.68  | 2.68  | 0    | 0    | 9 |
| IPR003672      | 1.72  | 2.67  | 1.62 | 2.23 | 9 |
| IPR002915      | 1.76  | 1.23  | 1.79 | 2    | 9 |
| IPR000510      | 5.4   | 3     | 5.44 | 5.18 | 9 |
| IPR005077      | 1.47  | 2     | 1.4  | 2.5  | 9 |
| IPR013848      | 2.09  | 2.22  | 2.15 | 1    | 9 |
| IPR011682      | 2.21  | 3.79  | 1.56 | 1.25 | 9 |
| IPR006869      | 2.93  | 9.31  | 1.07 | 1    | 9 |
| IPR002525      | 4.21  | 1     | 4.24 | 3.57 | 9 |
| IPR020864      | 3.56  | 4.28  | 1    | 0    | 9 |
| IPR019026      | 1.06  | 1     | 1.07 | 0    | 9 |
| IPR008913      | 1.86  | 2.55  | 1    | 1    | 9 |
| IPR003306      | 2.83  | 3.21  | 1    | 0    | 9 |
| IPR003307      | 3.72  | 3.72  | 0    | 0    | 9 |
| IPR011761      | 1.41  | 1.29  | 1.43 | 1.08 | 9 |
| IPR011765      | 3.1   | 7.68  | 2.63 | 1    | 9 |
| IPR007346      | 1.33  | 2.71  | 1.27 | 0    | 9 |
| IPR001022      | 33.67 | 33.67 | 0    | 0    | 9 |
| IPR002616      | 1.18  | 2.22  | 1.06 | 1.44 | 9 |
| IPR010402      | 35.7  | 35.7  | 0    | 0    | 9 |
| IPR015886      | 1.43  | 1.71  | 1.42 | 1    | 9 |
| IPR013735      | 1.01  | 0     | 1.01 | 0    | 9 |
| IPR012983      | 3.52  | 3.52  | 0    | 0    | 9 |
| IPR008731      | 1.62  | 0     | 1.62 | 1    | 9 |
| IPR011539      | 7.71  | 7.71  | 0    | 0    | 9 |
| IPR004588      | 1.04  | 1.91  | 1.02 | 0    | 9 |
| IPR007791      | 1.71  | 1     | 1.71 | 0    | 9 |
| IPR015803      | 1.24  | 1.96  | 1.19 | 1.02 | 9 |
| IPR010566      | 6.78  | 0     | 6.78 | 0    | 9 |
| IPR012878      | 1.92  | 2.04  | 1.92 | 1    | 9 |
| IPR020562      | 1.04  | 1.27  | 1.03 | 1    | 9 |
| IPR020560      | 1.05  | 1.28  | 1.03 | 1.02 | 9 |
| IPR000175      | 4.16  | 13.78 | 2.51 | 2.61 | 9 |
| IPR005492      | 25.56 | 28.62 | 1    | 0    | 9 |
| IPR001090      | 5.96  | 5.96  | 0    | 0    | 9 |
| IPR003618      | 2.14  | 2.14  | 0    | 0    | 9 |
| IPR009039      | 5.23  | 5.64  | 3    | 0    | 9 |
| IPR018973      | 1.28  | 1.14  | 1.34 | 1.13 | 9 |
| IPR012932      | 1.26  | 1.62  | 1.18 | 1.21 | 9 |
| IPR005594      | 2.78  | 0     | 2.78 | 0    | 9 |
| IPR013701      | 1.25  | 0     | 1.13 | 1.84 | 9 |
| IPR010663      | 1.87  | 1.26  | 1.89 | 1    | 9 |
| IPR010660      | 1.81  | 1.81  | 0    | 0    | 9 |
| PTHR23083:SF22 | 1.34  | 0     | 1.34 | 0    | 9 |
| IPR000602      | 2.14  | 3.68  | 1.53 | 1.25 | 9 |
| IPR021842      | 12.56 | 12.56 | 0    | 0    | 9 |
| IPR006134      | 1.97  | 3.32  | 1.34 | 1.73 | 9 |
| IPR000038      | 7.45  | 7.45  | 0    | 0    | 9 |
| PF06371        | 3.42  | 3.42  | 0    | 0    | 9 |
| IPR001792      | 1.62  | 3.07  | 1.43 | 1.93 | 9 |
| IPR021779      | 5.5   | 0     | 1    | 7    | 9 |
| IPR021772      | 1.2   | 1.2   | 0    | 0    | 9 |
| IPR019080      | 1.66  | 2.81  | 1.42 | 0    | 9 |
| IPR004249      | 35.43 | 35.43 | 0    | 0    | 9 |
| IPR003368      | 6.39  | 8.5   | 6.31 | 5.5  | 9 |
| IPR014867      | 1.41  | 2     | 1.41 | 1    | 9 |

|           |       |       |       |      |   |
|-----------|-------|-------|-------|------|---|
| IPR022164 | 2.85  | 2.85  | 0     | 0    | 9 |
| IPR008640 | 11.33 | 0     | 11.33 | 0    | 9 |
| IPR010376 | 1.36  | 1.82  | 1.26  | 0    | 9 |
| IPR011105 | 2.29  | 0     | 2.29  | 0    | 9 |
| IPR013338 | 1.58  | 0     | 1.58  | 0    | 9 |
| PTHR23050 | 2.79  | 3.14  | 1     | 0    | 9 |
| IPR001952 | 2.03  | 4.78  | 1.44  | 1    | 9 |
| IPR001045 | 1.7   | 3.19  | 1.5   | 1.26 | 9 |
| IPR019462 | 1.02  | 1     | 1.02  | 0    | 9 |
| TIGR03504 | 1.06  | 0     | 1.06  | 0    | 9 |
| IPR000926 | 1.51  | 2.38  | 1.46  | 1    | 9 |
| IPR005193 | 2.83  | 2.82  | 2.86  | 0    | 9 |
| IPR014002 | 30.86 | 30.86 | 0     | 0    | 8 |
| PTHR12526 | 1.19  | 2     | 1.19  | 1    | 8 |
| IPR012302 | 1.79  | 3.86  | 1.58  | 1.07 | 8 |
| IPR004167 | 2.48  | 2.99  | 2.46  | 1.13 | 8 |
| IPR011021 | 8.08  | 8.28  | 1.5   | 0    | 8 |
| IPR001333 | 1.05  | 2     | 1.04  | 1    | 8 |
| IPR011619 | 1.67  | 1     | 1.66  | 1.94 | 8 |
| IPR003153 | 2.04  | 2.04  | 0     | 0    | 8 |
| IPR012816 | 1.36  | 1.89  | 1.18  | 1    | 8 |
| IPR006614 | 2.57  | 2.57  | 0     | 0    | 8 |
| IPR003397 | 6.75  | 6.75  | 0     | 0    | 8 |
| IPR003583 | 1.02  | 0     | 1.02  | 1    | 8 |
| IPR001670 | 3.39  | 2.85  | 3.54  | 1.31 | 8 |
| IPR002820 | 1.07  | 1.14  | 1.06  | 1.02 | 8 |
| IPR007127 | 1.11  | 0     | 1.11  | 0    | 8 |
| PTHR11107 | 1.07  | 1     | 1.06  | 1.2  | 8 |
| IPR012912 | 1.32  | 1     | 1.34  | 1.14 | 8 |
| IPR022309 | 2.01  | 2.59  | 0     | 1    | 8 |
| IPR021983 | 1.18  | 1.18  | 0     | 0    | 8 |
| IPR001538 | 1.48  | 1     | 1.5   | 1.06 | 8 |
| PF01292   | 1.65  | 1     | 1.65  | 1    | 8 |
| IPR014741 | 2.04  | 2.04  | 0     | 0    | 8 |
| IPR002205 | 1.75  | 1.5   | 1.79  | 1    | 8 |
| IPR019752 | 2.35  | 1.29  | 2.21  | 4.24 | 8 |
| IPR007222 | 1.15  | 1.15  | 0     | 0    | 8 |
| IPR008410 | 1.11  | 0     | 1.11  | 0    | 8 |
| PF03407   | 7.52  | 11.88 | 1.18  | 0    | 8 |
| IPR002951 | 1.76  | 1.81  | 1     | 0    | 8 |
| IPR007525 | 1.81  | 1.5   | 1.27  | 4    | 8 |
| IPR000556 | 1.22  | 0     | 1.22  | 0    | 8 |
| IPR011647 | 3.75  | 0     | 3.75  | 0    | 8 |
| IPR011642 | 4.19  | 1.75  | 4.42  | 3.47 | 8 |
| IPR003101 | 1.91  | 1.91  | 0     | 0    | 8 |
| IPR003108 | 2.57  | 2.57  | 0     | 0    | 8 |
| IPR003109 | 8.64  | 8.64  | 0     | 0    | 8 |
| IPR005170 | 2.67  | 2     | 2.7   | 1.67 | 8 |
| IPR003346 | 4.27  | 1.5   | 4.18  | 8.22 | 8 |
| PTHR13793 | 1.08  | 1.08  | 0     | 0    | 8 |
| IPR007833 | 2.5   | 1     | 2.52  | 0    | 8 |
| IPR013529 | 1.67  | 1.2   | 1.69  | 1.33 | 8 |
| IPR005303 | 1.47  | 2.84  | 1.13  | 1    | 8 |
| IPR002658 | 1.2   | 1.26  | 1.19  | 1.35 | 8 |
| IPR013749 | 1.73  | 2.22  | 1.72  | 1.19 | 8 |
| IPR001766 | 12.52 | 12.69 | 1     | 0    | 8 |
| IPR011128 | 1.29  | 2.59  | 1.16  | 1    | 8 |
| IPR011127 | 1.28  | 4.43  | 1.25  | 0    | 8 |
| IPR010658 | 14.58 | 14.58 | 0     | 0    | 8 |
| IPR001564 | 1.34  | 4.08  | 1.05  | 1    | 8 |
| IPR007303 | 1.08  | 1.08  | 0     | 0    | 8 |
| IPR015341 | 2     | 3.48  | 1.41  | 1.25 | 8 |
| IPR019831 | 1.44  | 2.15  | 1.36  | 1.23 | 8 |
| PF03054   | 1.18  | 1.49  | 1.16  | 1    | 8 |
| IPR013637 | 1.48  | 1.52  | 1     | 0    | 8 |
| PF07842   | 2.01  | 2.01  | 0     | 0    | 8 |
| IPR007512 | 1.35  | 1.36  | 1     | 0    | 8 |
| IPR001898 | 2.17  | 3.19  | 1.99  | 1.09 | 8 |
| IPR015847 | 2.77  | 3.73  | 2.71  | 1.97 | 8 |

|               |       |       |       |      |   |
|---------------|-------|-------|-------|------|---|
| IPR001498     | 1.06  | 1.4   | 1.02  | 1.05 | 8 |
| IPR004255     | 4.85  | 5.36  | 4.8   | 1    | 8 |
| IPR004253     | 53.62 | 53.62 | 0     | 0    | 8 |
| IPR022257     | 2.64  | 2.64  | 0     | 0    | 8 |
| IPR004720     | 2.57  | 1     | 2.59  | 1    | 8 |
| IPR001269     | 2.01  | 4.03  | 1.82  | 1.12 | 8 |
| IPR014819     | 1.45  | 3     | 1.41  | 0    | 8 |
| PF11936       | 2.06  | 2.06  | 0     | 0    | 8 |
| IPR005085     | 1.68  | 3.33  | 1.48  | 1    | 8 |
| IPR009076     | 1.56  | 1.56  | 0     | 0    | 8 |
| IPR010303     | 1.43  | 1.43  | 0     | 0    | 8 |
| IPR010307     | 2.9   | 3     | 1     | 0    | 8 |
| IPR005126     | 2.06  | 0     | 2.06  | 0    | 8 |
| IPR000649     | 1.84  | 4.4   | 1.11  | 1.74 | 8 |
| IPR002108     | 6.58  | 6.58  | 0     | 0    | 8 |
| IPR004198     | 2.03  | 2.03  | 0     | 0    | 8 |
| IPR004199     | 1.53  | 1.38  | 1.55  | 1    | 8 |
| IPR001381     | 1.26  | 2.53  | 1.03  | 1.02 | 8 |
| IPR021309     | 1.38  | 1     | 1.38  | 1.5  | 8 |
| IPR011546     | 1.52  | 2.89  | 1.39  | 0    | 8 |
| IPR002888     | 3.38  | 4.23  | 3.31  | 1.87 | 8 |
| IPR003754     | 1.21  | 1.41  | 1.2   | 1.13 | 8 |
| IPR021773     | 1.84  | 1.84  | 0     | 0    | 8 |
| IPR021886     | 1.05  | 1.32  | 1.03  | 0    | 8 |
| IPR004112     | 2.18  | 1.82  | 2.26  | 1.49 | 8 |
| IPR004114     | 1.55  | 1.43  | 1.4   | 3.22 | 8 |
| IPR004117     | 58.37 | 61.56 | 0     | 1    | 8 |
| IPR002220     | 2.44  | 3     | 2.44  | 1.76 | 8 |
| IPR003200     | 1.09  | 1     | 1.1   | 1    | 8 |
| IPR015129     | 8     | 8     | 0     | 0    | 8 |
| IPR015123     | 4.75  | 4.75  | 0     | 0    | 8 |
| IPR019503     | 1.25  | 1     | 1.26  | 0    | 8 |
| IPR002734     | 2.08  | 1.76  | 2.16  | 1.29 | 8 |
| IPR015425     | 2.13  | 2.13  | 0     | 0    | 8 |
| IPR002505     | 1.79  | 1.67  | 1.8   | 1.11 | 8 |
| IPR000840     | 5.2   | 5.2   | 0     | 0    | 8 |
| IPR020802     | 1.25  | 0     | 1.25  | 0    | 8 |
| IPR018799     | 1.43  | 1.43  | 0     | 0    | 8 |
| IPR018967     | 1.49  | 1.77  | 1.37  | 1.92 | 8 |
| IPR000674     | 3.15  | 4.09  | 2.89  | 5.13 | 8 |
| IPR019446     | 1.85  | 1.91  | 1     | 0    | 8 |
| IPR018886     | 1.19  | 1     | 1.19  | 1.36 | 8 |
| IPR013993     | 2.3   | 2.3   | 0     | 0    | 8 |
| IPR013999     | 2.46  | 2.46  | 0     | 0    | 8 |
| IPR005311     | 2.29  | 1     | 2.29  | 0    | 8 |
| IPR011519     | 2.75  | 1.36  | 3.33  | 1    | 8 |
| IPR006062     | 2.18  | 2.13  | 2.17  | 2.48 | 8 |
| IPR015798     | 3.03  | 5.59  | 1.29  | 1    | 8 |
| IPR011496     | 1.17  | 1.23  | 1.14  | 1    | 8 |
| IPR006562     | 2.29  | 2.29  | 0     | 0    | 8 |
| IPR006567     | 2.3   | 2.3   | 0     | 0    | 8 |
| IPR008616     | 1.1   | 1.24  | 1.05  | 1.2  | 8 |
| IPR011651     | 3.33  | 3.33  | 0     | 0    | 8 |
| IPR013698     | 2.06  | 2.2   | 1     | 0    | 8 |
| IPR012569     | 11.2  | 2     | 12.22 | 0    | 8 |
| IPR001241     | 1.68  | 1.52  | 1.71  | 1    | 8 |
| IPR005314     | 1.59  | 1.59  | 0     | 0    | 8 |
| IPR004850     | 1     | 1     | 1     | 0    | 8 |
| IPR004852     | 1.76  | 0     | 1.76  | 1    | 8 |
| IPR001574     | 13.5  | 21.5  | 1.5   | 0    | 8 |
| IPR001578     | 3.79  | 3.79  | 0     | 0    | 8 |
| IPR007647     | 2.26  | 3.07  | 0     | 1    | 8 |
| IPR015378     | 1.44  | 1     | 1.44  | 0    | 8 |
| IPR010472     | 3.21  | 3.21  | 0     | 0    | 8 |
| IPR014930     | 4     | 4     | 0     | 0    | 8 |
| IPR004343     | 1.61  | 1.62  | 1     | 0    | 8 |
| IPR004344     | 4.98  | 5.32  | 1.29  | 0    | 8 |
| PTHR13712:SF9 | 1.11  | 1.33  | 1.07  | 1    | 8 |
| IPR021717     | 1.59  | 1.59  | 0     | 0    | 8 |

|                |       |       |      |       |   |
|----------------|-------|-------|------|-------|---|
| IPR008824      | 1.22  | 1     | 1.24 | 1     | 8 |
| IPR002797      | 2.84  | 2     | 2.83 | 3.03  | 8 |
| IPR001322      | 2.47  | 3.3   | 1    | 1     | 8 |
| IPR009254      | 2.57  | 2.74  | 1    | 0     | 8 |
| TIGR01686      | 1.18  | 0     | 1.18 | 0     | 8 |
| PF02374        | 2.05  | 2.28  | 2.04 | 1.76  | 8 |
| PTHR10098:SF12 | 1.4   | 2.33  | 1.3  | 0     | 8 |
| IPR001158      | 4.19  | 4.32  | 0    | 1     | 8 |
| IPR022060      | 1.15  | 0     | 1.15 | 0     | 8 |
| IPR003385      | 1.2   | 3.15  | 1.14 | 1.11  | 8 |
| IPR003382      | 1.79  | 1.83  | 1.75 | 2.36  | 8 |
| IPR001830      | 1.8   | 4.32  | 1.29 | 1     | 8 |
| IPR002717      | 3.74  | 3.74  | 0    | 0     | 8 |
| IPR013567      | 1.43  | 1.43  | 0    | 0     | 8 |
| IPR006863      | 2.66  | 2.71  | 1    | 0     | 8 |
| IPR002088      | 10.42 | 10.67 | 1    | 1     | 8 |
| IPR007159      | 2.75  | 2     | 2.33 | 6.72  | 8 |
| IPR012592      | 1.15  | 1.16  | 1    | 0     | 8 |
| IPR012591      | 1.14  | 1.14  | 0    | 0     | 8 |
| IPR008273      | 8.37  | 8.37  | 0    | 0     | 8 |
| IPR004185      | 1.11  | 0     | 1.12 | 1     | 8 |
| IPR007345      | 1.37  | 1     | 1.38 | 1.12  | 8 |
| IPR019581      | 1.16  | 1.16  | 0    | 0     | 8 |
| IPR019580      | 1.38  | 1.38  | 0    | 0     | 8 |
| IPR019582      | 1.14  | 1.14  | 0    | 0     | 8 |
| IPR013736      | 1.59  | 3     | 1.52 | 1     | 8 |
| IPR010614      | 1.26  | 1.4   | 1.22 | 1.43  | 8 |
| IPR018121      | 7.39  | 7.39  | 0    | 0     | 8 |
| IPR018127      | 4.31  | 4.31  | 0    | 0     | 8 |
| IPR012984      | 1.22  | 1.22  | 0    | 0     | 8 |
| IPR004102      | 1.96  | 2     | 1    | 0     | 8 |
| IPR008139      | 13.24 | 13.24 | 0    | 0     | 8 |
| IPR008136      | 1.19  | 1.06  | 1.19 | 1     | 8 |
| IPR004881      | 1.29  | 1.78  | 1.27 | 1.2   | 8 |
| IPR005913      | 1.49  | 2.1   | 1.45 | 1.42  | 8 |
| IPR007234      | 1.4   | 1.4   | 0    | 0     | 8 |
| IPR003617      | 3     | 3     | 0    | 0     | 8 |
| IPR004398      | 1.09  | 1.9   | 1.08 | 1     | 8 |
| IPR004210      | 18.5  | 18.5  | 0    | 0     | 8 |
| IPR018975      | 5.62  | 0     | 1    | 13.33 | 8 |
| IPR000684      | 15.47 | 15.47 | 0    | 0     | 8 |
| IPR000685      | 1.66  | 4.67  | 1.57 | 1     | 8 |
| IPR001222      | 3.09  | 4.17  | 0    | 1.17  | 8 |
| IPR001228      | 1.32  | 1.24  | 1.32 | 1.41  | 8 |
| IPR006336      | 1.48  | 2.62  | 1.47 | 1.17  | 8 |
| PF11971        | 1.5   | 1.5   | 0    | 0     | 8 |
| IPR006740      | 4.95  | 4.95  | 0    | 0     | 8 |
| PTHR22572      | 1.29  | 2.07  | 1.2  | 1.25  | 8 |
| IPR000031      | 1.25  | 1.29  | 1.23 | 1.62  | 8 |
| IPR009647      | 1.05  | 1     | 1.05 | 0     | 8 |
| IPR006895      | 4.93  | 4.93  | 0    | 0     | 8 |
| IPR018306      | 4.1   | 16.79 | 1.24 | 1     | 8 |
| IPR004367      | 4.6   | 4.6   | 0    | 0     | 8 |
| IPR007037      | 1.67  | 2     | 1.66 | 0     | 8 |
| IPR010926      | 2.36  | 2.36  | 0    | 0     | 8 |
| IPR001135      | 1.87  | 1.68  | 1.86 | 2.3   | 8 |
| IPR005200      | 1.44  | 1.62  | 1.06 | 0     | 8 |
| IPR010743      | 1.07  | 0     | 1.07 | 1     | 8 |
| IPR019466      | 4.15  | 5.1   | 1    | 0     | 8 |
| IPR012706      | 4.27  | 0     | 4.27 | 0     | 8 |
| IPR003165      | 4.72  | 6.14  | 1    | 1     | 8 |
| IPR013132      | 1.33  | 1.21  | 1.36 | 1     | 8 |
| IPR006629      | 5.33  | 5.33  | 0    | 0     | 8 |
| IPR000101      | 2.11  | 3.86  | 1.9  | 1     | 8 |
| IPR000843      | 9.09  | 1.5   | 9.12 | 0     | 8 |
| PF11924        | 2.36  | 0     | 2.36 | 0     | 8 |
| IPR010819      | 1.5   | 2.5   | 1.44 | 1.7   | 8 |
| IPR010810      | 2.11  | 5     | 2.1  | 0     | 8 |
| IPR007324      | 1.84  | 0     | 1.84 | 0     | 8 |

|                |       |       |      |      |   |
|----------------|-------|-------|------|------|---|
| IPR013546      | 2.81  | 1     | 2.81 | 0    | 8 |
| IPR019575      | 1.62  | 1.44  | 1.65 | 1    | 8 |
| IPR019008      | 1.41  | 1.49  | 1    | 0    | 8 |
| IPR021602      | 4.06  | 7.38  | 1.11 | 0    | 8 |
| IPR002871      | 1.26  | 1.33  | 1.25 | 1.2  | 8 |
| IPR005111      | 1.6   | 1.29  | 1.58 | 2.09 | 8 |
| IPR005116      | 2.74  | 0     | 2.77 | 2    | 8 |
| IPR005114      | 5.8   | 12    | 5.36 | 0    | 8 |
| PTHR23083:SF15 | 1     | 1     | 1    | 0    | 8 |
| IPR000183      | 4.1   | 5.18  | 4.05 | 2.48 | 8 |
| IPR007434      | 1.12  | 1.5   | 1.11 | 0    | 8 |
| IPR013079      | 3.23  | 3.63  | 1    | 1    | 8 |
| IPR015942      | 2.07  | 1.64  | 2.09 | 1.86 | 8 |
| IPR013751      | 1.78  | 1.29  | 1.81 | 1    | 8 |
| IPR010280      | 1.65  | 1.59  | 1.65 | 1.67 | 8 |
| TIGR03507      | 3.32  | 0     | 3.32 | 0    | 8 |
| IPR001754      | 1.37  | 1.58  | 1.3  | 2.02 | 8 |
| IPR006527      | 42.33 | 42.33 | 0    | 0    | 7 |
| IPR017884      | 1.65  | 1.65  | 0    | 0    | 7 |
| IPR007634      | 1.13  | 1     | 1.13 | 0    | 7 |
| IPR001339      | 1.59  | 1.59  | 0    | 0    | 7 |
| IPR002903      | 1.03  | 1.27  | 1.02 | 0    | 7 |
| PF02345        | 11.5  | 11.5  | 0    | 0    | 7 |
| IPR015866      | 1.11  | 1.89  | 1.04 | 1    | 7 |
| IPR005380      | 12.71 | 12.71 | 0    | 0    | 7 |
| IPR010509      | 1.7   | 2.79  | 1.34 | 0    | 7 |
| IPR013857      | 1.4   | 1.83  | 1.1  | 0    | 7 |
| IPR006613      | 2.78  | 2.78  | 0    | 0    | 7 |
| IPR006615      | 4.3   | 4.3   | 0    | 0    | 7 |
| IPR003392      | 3.19  | 3.67  | 1    | 0    | 7 |
| IPR008424      | 6.5   | 6.5   | 0    | 0    | 7 |
| IPR014837      | 2.55  | 2.55  | 0    | 0    | 7 |
| IPR015415      | 3.2   | 3.55  | 0    | 1.15 | 7 |
| IPR002988      | 5     | 0     | 5    | 0    | 7 |
| IPR019236      | 1.49  | 2.1   | 1.14 | 0    | 7 |
| IPR005357      | 2.32  | 0     | 2.25 | 3.58 | 7 |
| IPR004919      | 1.69  | 1.83  | 1.7  | 1.33 | 7 |
| IPR008902      | 2.81  | 4.31  | 2.73 | 1    | 7 |
| IPR011451      | 1.31  | 0     | 1.31 | 0    | 7 |
| TIGR01954      | 1.72  | 0     | 1.72 | 0    | 7 |
| IPR005146      | 1.21  | 1.34  | 1.18 | 1.41 | 7 |
| IPR008042      | 5.38  | 5.38  | 0    | 0    | 7 |
| IPR003316      | 7.62  | 7.62  | 0    | 0    | 7 |
| IPR004629      | 1.25  | 1     | 1.25 | 0    | 7 |
| IPR002594      | 2.23  | 4.07  | 1.39 | 2.1  | 7 |
| IPR010439      | 5.04  | 5.04  | 0    | 0    | 7 |
| IPR004291      | 3.63  | 3     | 3.67 | 2.57 | 7 |
| IPR004299      | 2.54  | 6.07  | 1.56 | 0    | 7 |
| IPR003776      | 1.26  | 0     | 1.27 | 1.08 | 7 |
| IPR008727      | 3.14  | 0     | 3.15 | 2    | 7 |
| IPR013591      | 18.12 | 18.12 | 0    | 0    | 7 |
| IPR004305      | 1.62  | 2.08  | 1.5  | 2.5  | 7 |
| IPR004302      | 1.9   | 2.67  | 1.72 | 1    | 7 |
| IPR002602      | 7     | 7     | 0    | 0    | 7 |
| IPR004030      | 1.42  | 2.13  | 1.05 | 1    | 7 |
| TIGR02608      | 8.5   | 0     | 8.5  | 0    | 7 |
| PF12468        | 3.65  | 0     | 3.65 | 0    | 7 |
| IPR002496      | 1.04  | 1.03  | 1.04 | 1    | 7 |
| IPR006571      | 3.57  | 3.57  | 0    | 0    | 7 |
| IPR003887      | 4.57  | 4.57  | 0    | 0    | 7 |
| PTHR23416:SF7  | 1.64  | 1.56  | 1.65 | 1.25 | 7 |
| IPR005031      | 1.46  | 2     | 1.38 | 1.14 | 7 |
| IPR002569      | 1.56  | 1.92  | 1.54 | 1.17 | 7 |
| IPR011646      | 1.38  | 1.65  | 1.35 | 1.12 | 7 |
| IPR011644      | 1.96  | 4.1   | 1.07 | 0    | 7 |
| IPR020828      | 1.81  | 2.85  | 1.73 | 1.16 | 7 |
| IPR000711      | 1.09  | 1.48  | 1.05 | 0    | 7 |
| IPR001444      | 5.99  | 3     | 6.01 | 0    | 7 |
| IPR002369      | 4.06  | 4.16  | 1    | 0    | 7 |

|                |       |       |       |      |   |
|----------------|-------|-------|-------|------|---|
| IPR018004      | 11.54 | 33.55 | 1.36  | 1    | 7 |
| IPR018948      | 1.03  | 1.14  | 1.02  | 0    | 7 |
| IPR006641      | 1.69  | 2.15  | 1.68  | 1    | 7 |
| IPR001874      | 1.18  | 1.25  | 1.18  | 0    | 7 |
| IPR009721      | 3.33  | 6.54  | 2.53  | 1    | 7 |
| IPR002750      | 1.09  | 0     | 1.08  | 1.2  | 7 |
| IPR006703      | 9.51  | 11.85 | 1.62  | 0    | 7 |
| IPR006702      | 30.67 | 30.67 | 0     | 0    | 7 |
| IPR012946      | 11.74 | 11.74 | 0     | 0    | 7 |
| IPR003726      | 1.49  | 2.54  | 1.38  | 1    | 7 |
| IPR006124      | 1.74  | 2.16  | 1.72  | 1.52 | 7 |
| IPR000007      | 5.37  | 5.37  | 0     | 0    | 7 |
| PF12515        | 9.57  | 9.57  | 0     | 0    | 7 |
| IPR001063      | 1.16  | 2.58  | 1.02  | 1    | 7 |
| IPR019449      | 1.19  | 1.23  | 1     | 0    | 7 |
| IPR015342      | 1.11  | 1.11  | 0     | 0    | 7 |
| PF12047        | 3.86  | 3.86  | 0     | 0    | 7 |
| IPR021099      | 17.86 | 17.86 | 0     | 0    | 7 |
| IPR004152      | 3.77  | 3.77  | 0     | 0    | 7 |
| IPR010754      | 1.69  | 1.69  | 0     | 0    | 7 |
| IPR009223      | 10.59 | 10.59 | 0     | 0    | 7 |
| IPR008635      | 11.75 | 0     | 11.75 | 0    | 7 |
| IPR015848      | 1.03  | 1.39  | 1.02  | 1    | 7 |
| IPR022092      | 1.18  | 1.19  | 1     | 0    | 7 |
| IPR010524      | 1.21  | 0     | 1.21  | 0    | 7 |
| IPR010523      | 1.78  | 0     | 1.78  | 0    | 7 |
| IPR006637      | 5.55  | 0     | 5.55  | 0    | 7 |
| IPR002761      | 1.21  | 1.12  | 1.31  | 1.24 | 7 |
| IPR017456      | 1.1   | 2.09  | 1.02  | 1    | 7 |
| PF11930        | 1.91  | 2.35  | 1.8   | 2.58 | 7 |
| IPR015289      | 1.93  | 1.56  | 2.5   | 0    | 7 |
| IPR007842      | 2.67  | 2     | 1.83  | 5.7  | 7 |
| IPR005379      | 11.14 | 11.14 | 0     | 0    | 7 |
| IPR018769      | 3.81  | 2     | 3.83  | 0    | 7 |
| PTHR10098:SF14 | 1     | 1     | 1     | 1    | 7 |
| IPR005121      | 1.05  | 1.26  | 1.03  | 1    | 7 |
| IPR000642      | 1.76  | 4.22  | 1.53  | 0    | 7 |
| IPR019606      | 1.61  | 0     | 1.61  | 0    | 7 |
| PF11898        | 1.05  | 0     | 1.05  | 0    | 7 |
| IPR003856      | 2.29  | 1     | 2.3   | 1    | 7 |
| IPR014895      | 2.08  | 2.7   | 1.86  | 0    | 7 |
| IPR013049      | 1.28  | 1.51  | 1     | 1.02 | 7 |
| IPR010652      | 1.39  | 1.5   | 1.39  | 1.43 | 7 |
| IPR009270      | 1.42  | 0     | 1.42  | 0    | 7 |
| IPR006170      | 22.05 | 22.05 | 0     | 0    | 7 |
| IPR006172      | 1.07  | 1.12  | 1     | 1    | 7 |
| IPR019474      | 1.58  | 1.58  | 0     | 0    | 7 |
| IPR016061      | 1.11  | 1.35  | 1.02  | 1    | 7 |
| IPR013748      | 2.46  | 3.12  | 0     | 1.36 | 7 |
| IPR019556      | 2.49  | 0     | 2.49  | 0    | 7 |
| IPR019551      | 2.47  | 4     | 2.46  | 0    | 7 |
| IPR014820      | 1.38  | 0     | 1.38  | 1    | 7 |
| IPR015390      | 4.19  | 4.19  | 0     | 0    | 7 |
| IPR007894      | 1.11  | 0     | 1.11  | 0    | 7 |
| PF06010        | 1     | 1     | 0     | 0    | 7 |
| IPR008044      | 1.08  | 0     | 1.08  | 0    | 7 |
| PF11969        | 1.58  | 2.2   | 1.02  | 1    | 7 |
| PF03138        | 17.14 | 17.14 | 0     | 0    | 7 |
| IPR022126      | 3     | 3     | 0     | 0    | 7 |
| IPR019441      | 1.45  | 1.45  | 0     | 0    | 7 |
| IPR005580      | 1.39  | 1     | 1.41  | 1    | 7 |
| IPR006805      | 1.56  | 2.51  | 1.52  | 1.18 | 7 |
| IPR013995      | 2.62  | 2.62  | 0     | 0    | 7 |
| IPR003700      | 1.08  | 1.23  | 1.08  | 1    | 7 |
| IPR013716      | 1     | 1     | 0     | 0    | 7 |
| IPR004860      | 1.17  | 1.3   | 1     | 0    | 7 |
| IPR004867      | 1.17  | 2     | 1.14  | 1    | 7 |
| PF11187        | 1.24  | 0     | 1.24  | 0    | 7 |
| IPR011700      | 2.27  | 2.38  | 1     | 1    | 7 |

|           |       |       |      |      |   |
|-----------|-------|-------|------|------|---|
| IPR000023 | 1.79  | 4.41  | 1.41 | 1.8  | 7 |
| IPR013237 | 1.34  | 0     | 1.34 | 0    | 7 |
| IPR006880 | 1.6   | 1.6   | 0    | 0    | 7 |
| IPR013917 | 1.12  | 1.15  | 1.27 | 1    | 7 |
| IPR003782 | 1.68  | 1.46  | 1.73 | 1.29 | 7 |
| IPR001127 | 2.47  | 0     | 2.47 | 0    | 7 |
| IPR020097 | 2.43  | 5.75  | 2.14 | 1.68 | 7 |
| IPR022233 | 1.25  | 1.25  | 0    | 0    | 7 |
| IPR013618 | 3.44  | 3.64  | 2    | 0    | 7 |
| IPR003190 | 1.05  | 1     | 1.05 | 1    | 7 |
| IPR001636 | 1.09  | 1.24  | 1.07 | 1.12 | 7 |
| IPR002558 | 2.02  | 2.02  | 0    | 0    | 7 |
| IPR003114 | 2.11  | 2.11  | 0    | 0    | 7 |
| MF_00316  | 1.03  | 0     | 1.04 | 1    | 7 |
| IPR013102 | 1.08  | 1.33  | 1.08 | 1    | 7 |
| IPR004237 | 7.14  | 0     | 7.14 | 0    | 7 |
| IPR018958 | 2.15  | 1.51  | 2.31 | 0    | 7 |
| IPR008006 | 2.06  | 0     | 2.06 | 0    | 7 |
| IPR005107 | 2.51  | 4.07  | 2.24 | 1.87 | 7 |
| IPR013342 | 3.48  | 2.38  | 3.52 | 4.65 | 7 |
| IPR013691 | 1.38  | 1     | 1.39 | 1    | 7 |
| IPR001865 | 1.16  | 2.49  | 1.02 | 1    | 7 |
| IPR018205 | 3.75  | 3.75  | 0    | 0    | 7 |
| IPR003833 | 1.44  | 1     | 1.47 | 1    | 7 |
| IPR014787 | 1.06  | 0     | 1.06 | 0    | 7 |
| IPR014878 | 1.49  | 2.21  | 1.35 | 0    | 7 |
| IPR012958 | 1.47  | 1.47  | 0    | 0    | 7 |
| IPR012957 | 1.83  | 1.83  | 0    | 0    | 7 |
| PF12054   | 1.12  | 1.12  | 0    | 0    | 7 |
| IPR003732 | 1.05  | 1.28  | 1.02 | 1    | 7 |
| IPR005108 | 2.96  | 2.96  | 0    | 0    | 7 |
| IPR005101 | 1.81  | 4.13  | 1.53 | 1.83 | 7 |
| IPR007160 | 2.08  | 0     | 2.03 | 2.45 | 7 |
| IPR021130 | 1.05  | 1.02  | 1.05 | 1.03 | 7 |
| IPR021860 | 1.57  | 2.75  | 1.48 | 1    | 7 |
| IPR007646 | 1.81  | 2.34  | 0    | 1    | 7 |
| IPR000015 | 4.65  | 1     | 4.68 | 0    | 7 |
| IPR019180 | 1.13  | 1.19  | 1.03 | 0    | 7 |
| IPR005533 | 1.55  | 1.55  | 0    | 0    | 7 |
| IPR002622 | 3.54  | 1     | 3.86 | 1.25 | 7 |
| IPR018328 | 1.64  | 1.64  | 0    | 0    | 7 |
| IPR018326 | 1.61  | 1.61  | 0    | 0    | 7 |
| IPR018327 | 1.64  | 1.64  | 0    | 0    | 7 |
| IPR018325 | 1.7   | 1.7   | 0    | 0    | 7 |
| IPR010290 | 2.27  | 1     | 2.28 | 1    | 7 |
| IPR008557 | 1.31  | 1     | 1.31 | 1    | 7 |
| IPR011261 | 1.64  | 2.03  | 1    | 1    | 7 |
| IPR011266 | 3.59  | 0     | 3.59 | 0    | 7 |
| IPR018704 | 1.02  | 0     | 1.02 | 0    | 7 |
| IPR007936 | 1.46  | 14    | 1.29 | 0    | 7 |
| IPR002791 | 1.8   | 2.69  | 1.08 | 1.06 | 7 |
| IPR011019 | 2.05  | 2.05  | 0    | 0    | 7 |
| IPR002346 | 2.68  | 4.11  | 2.46 | 1.87 | 7 |
| IPR019104 | 1.5   | 0     | 1.5  | 0    | 7 |
| IPR000514 | 1.34  | 1.32  | 1.36 | 1    | 7 |
| IPR012495 | 2.66  | 1     | 2.67 | 0    | 7 |
| IPR010538 | 1.27  | 0     | 1.27 | 0    | 7 |
| IPR013849 | 1.02  | 0     | 1.02 | 1    | 7 |
| IPR003140 | 1.82  | 3.71  | 1.52 | 1.4  | 7 |
| IPR004262 | 8.11  | 10.78 | 1    | 0    | 7 |
| PF11865   | 1.39  | 1.39  | 0    | 0    | 7 |
| PTHR23283 | 1.09  | 1.67  | 1.03 | 1    | 7 |
| IPR008580 | 2.68  | 2.68  | 0    | 0    | 7 |
| IPR009769 | 14.56 | 14.56 | 0    | 0    | 7 |
| IPR007858 | 2.83  | 2.83  | 0    | 0    | 7 |
| IPR014808 | 1.12  | 1.14  | 0    | 1    | 7 |
| IPR013568 | 2.23  | 4.18  | 1.11 | 0    | 7 |
| IPR013565 | 1.33  | 1.59  | 1.07 | 0    | 7 |
| IPR013566 | 1.41  | 1.41  | 0    | 0    | 7 |



|                |       |       |      |      |   |
|----------------|-------|-------|------|------|---|
| IPR004695      | 1.45  | 3.67  | 1.16 | 1.09 | 7 |
| IPR020865      | 3.73  | 4.28  | 1    | 0    | 7 |
| IPR019023      | 1.8   | 1.8   | 0    | 0    | 7 |
| PTHR21666      | 1.23  | 1.5   | 1.18 | 0    | 7 |
| IPR018773      | 1.24  | 0     | 1.24 | 0    | 7 |
| PF04755        | 4.53  | 14.44 | 1.65 | 0    | 7 |
| IPR003309      | 46.83 | 46.83 | 0    | 0    | 7 |
| IPR019614      | 1.6   | 1.11  | 1.62 | 1.11 | 7 |
| IPR021833      | 6     | 6     | 0    | 0    | 7 |
| IPR003846      | 1.12  | 1.35  | 1.09 | 1.33 | 7 |
| IPR005576      | 2.36  | 3.2   | 0    | 1    | 7 |
| IPR007698      | 1.6   | 1.75  | 1.59 | 1    | 7 |
| IPR001971      | 1.26  | 3.65  | 1.01 | 1    | 7 |
| IPR018866      | 2.84  | 2.84  | 0    | 0    | 7 |
| IPR021315      | 1.87  | 0     | 1.89 | 1    | 7 |
| IPR019409      | 1.12  | 1.12  | 0    | 0    | 7 |
| IPR000232      | 5.68  | 5.68  | 0    | 0    | 7 |
| IPR012280      | 1.95  | 2.23  | 1.92 | 2.15 | 7 |
| IPR004105      | 1.7   | 0     | 1.73 | 1    | 7 |
| IPR008737      | 8.54  | 8.54  | 0    | 0    | 7 |
| IPR009462      | 1.76  | 1.76  | 0    | 0    | 7 |
| PF11789        | 1.54  | 1.53  | 2    | 0    | 7 |
| PF11783        | 1.39  | 0     | 1.41 | 1    | 7 |
| IPR013212      | 1.84  | 1.84  | 0    | 0    | 7 |
| IPR002036      | 1.04  | 1.73  | 1.02 | 0    | 7 |
| IPR007554      | 2.15  | 0     | 2.18 | 1.5  | 7 |
| IPR000523      | 1.36  | 1     | 1.38 | 1.3  | 7 |
| PF06468        | 3     | 3.96  | 1.83 | 1    | 7 |
| IPR008302      | 1.28  | 1.25  | 1.28 | 1    | 7 |
| IPR004883      | 41.25 | 41.25 | 0    | 0    | 7 |
| IPR002489      | 1.33  | 1.49  | 1.26 | 2.19 | 7 |
| IPR006580      | 4.4   | 4.4   | 0    | 0    | 7 |
| IPR006586      | 6.94  | 6.94  | 0    | 0    | 7 |
| IPR005491      | 3.34  | 3.43  | 1    | 0    | 7 |
| IPR006912      | 9.9   | 9.9   | 0    | 0    | 7 |
| IPR000811      | 1.5   | 2.11  | 1.42 | 1.11 | 7 |
| IPR001619      | 5.91  | 5.91  | 0    | 0    | 7 |
| IPR015191      | 1.02  | 0     | 1.02 | 0    | 7 |
| IPR013168      | 1.36  | 0     | 1.36 | 0    | 7 |
| IPR003338      | 2.04  | 2.53  | 1.03 | 2.09 | 7 |
| IPR003331      | 1.48  | 2.71  | 1.45 | 1.71 | 7 |
| PTHR23022      | 2.42  | 1.93  | 2.88 | 2    | 7 |
| IPR002119      | 6.48  | 6.55  | 1    | 0    | 7 |
| IPR013537      | 1.44  | 1.55  | 1.11 | 0    | 7 |
| IPR000341      | 3.68  | 3.68  | 0    | 0    | 7 |
| IPR001699      | 11.47 | 11.47 | 0    | 0    | 7 |
| IPR001694      | 1.94  | 5.59  | 1.5  | 2.02 | 7 |
| IPR012669      | 1.33  | 0     | 1.33 | 0    | 7 |
| IPR018720      | 1.75  | 0     | 1.68 | 2.17 | 7 |
| IPR010347      | 1.98  | 1.98  | 0    | 0    | 7 |
| IPR008533      | 1.13  | 1     | 1.13 | 1    | 7 |
| IPR004871      | 3.64  | 3.64  | 0    | 0    | 7 |
| IPR007012      | 2.53  | 2.58  | 1    | 0    | 7 |
| IPR011079      | 1.31  | 2     | 1.31 | 1    | 7 |
| IPR001075      | 1.4   | 2.18  | 1.28 | 1.57 | 7 |
| IPR011505      | 2.41  | 0     | 2.41 | 0    | 7 |
| IPR003008      | 1.76  | 2.39  | 1.09 | 1.5  | 7 |
| IPR001796      | 1.15  | 1.51  | 1.1  | 1.75 | 7 |
| PTHR10588:SF23 | 1.15  | 1.2   | 1    | 0    | 7 |
| IPR006553      | 6.37  | 6.38  | 6    | 0    | 7 |
| PF12409        | 1.46  | 1.46  | 0    | 0    | 7 |
| IPR015163      | 2.51  | 2.48  | 1    | 2.59 | 7 |
| IPR013137      | 2.3   | 2.21  | 1    | 2.74 | 7 |
| IPR003488      | 1.13  | 2     | 1.13 | 1    | 7 |
| IPR019545      | 1.09  | 1.27  | 1.05 | 2    | 7 |
| IPR002196      | 2.03  | 1.67  | 2.05 | 0    | 7 |
| IPR000846      | 2.4   | 5.7   | 2.37 | 2    | 7 |
| IPR010817      | 1.02  | 0     | 1.02 | 0    | 7 |
| IPR015015      | 2     | 2     | 0    | 0    | 7 |

|                |      |       |      |      |   |
|----------------|------|-------|------|------|---|
| IPR004948      | 1.11 | 1.25  | 1    | 1.17 | 7 |
| IPR006845      | 3.06 | 3.06  | 0    | 0    | 7 |
| IPR010176      | 36.5 | 0     | 36.5 | 0    | 7 |
| IPR003816      | 1.42 | 1     | 1.42 | 1.44 | 7 |
| IPR001424      | 1.76 | 4.32  | 1.13 | 1    | 7 |
| IPR015256      | 1.2  | 1.32  | 0    | 1.02 | 7 |
| IPR002878      | 3.65 | 0     | 4.2  | 2.54 | 7 |
| IPR003220      | 2.66 | 1     | 2.65 | 3.11 | 7 |
| IPR011109      | 2.44 | 1     | 2.45 | 0    | 7 |
| PTHR23083:SF18 | 1.16 | 1     | 1.17 | 0    | 7 |
| IPR000181      | 1.67 | 1.96  | 1.66 | 2    | 7 |
| IPR006109      | 1.21 | 2.52  | 1.07 | 1    | 7 |
| IPR001959      | 6.91 | 0     | 6.97 | 6.44 | 7 |
| IPR001046      | 1.81 | 3.2   | 1.63 | 1.4  | 7 |
| IPR002634      | 1.97 | 2.45  | 1.89 | 1    | 7 |
| IPR013752      | 1.8  | 3.81  | 1.67 | 1.04 | 7 |
| IPR005196      | 1.41 | 1.15  | 1.46 | 1    | 7 |
| IPR005195      | 1.5  | 1.54  | 1.49 | 1    | 7 |
| IPR014004      | 2.49 | 0     | 2.49 | 0    | 6 |
| IPR021729      | 1.41 | 0     | 1.41 | 0    | 6 |
| IPR021894      | 1.44 | 1.44  | 0    | 0    | 6 |
| IPR006695      | 3.41 | 3.94  | 1    | 0    | 6 |
| IPR003462      | 1.74 | 1.34  | 1.85 | 1.48 | 6 |
| IPR012301      | 1.79 | 3.79  | 1.58 | 1.07 | 6 |
| IPR004165      | 3.34 | 3.45  | 3.4  | 1.56 | 6 |
| IPR004166      | 3.88 | 4     | 1    | 0    | 6 |
| IPR007370      | 1.06 | 1     | 1.06 | 1    | 6 |
| IPR009240      | 4.33 | 4.33  | 0    | 0    | 6 |
| IPR002013      | 4.61 | 4.61  | 0    | 0    | 6 |
| IPR005062      | 4.38 | 4.38  | 0    | 0    | 6 |
| PTHR16166      | 1.5  | 1.5   | 0    | 0    | 6 |
| IPR005381      | 7    | 7     | 0    | 0    | 6 |
| IPR013858      | 1.49 | 1     | 1.5  | 0    | 6 |
| IPR006603      | 6.17 | 6.53  | 1    | 0    | 6 |
| IPR010827      | 5.65 | 3.1   | 5.7  | 0    | 6 |
| IPR001675      | 6.23 | 8.61  | 1.18 | 0    | 6 |
| IPR019035      | 1.18 | 1.18  | 0    | 0    | 6 |
| IPR008909      | 1.63 | 2.14  | 1.62 | 1    | 6 |
| IPR010323      | 1.11 | 1.15  | 1.11 | 0    | 6 |
| IPR012894      | 1.85 | 1.5   | 1.85 | 0    | 6 |
| IPR012893      | 1.81 | 1.33  | 1.82 | 0    | 6 |
| IPR001207      | 4.02 | 1     | 4.07 | 3.71 | 6 |
| IPR019590      | 8.25 | 8.25  | 0    | 0    | 6 |
| IPR012919      | 3.04 | 3.07  | 1    | 0    | 6 |
| IPR012913      | 3.18 | 3.18  | 0    | 0    | 6 |
| IPR021327      | 1.61 | 1     | 1.61 | 0    | 6 |
| IPR000368      | 2.86 | 13.86 | 1.29 | 0    | 6 |
| IPR019415      | 1.17 | 1.17  | 0    | 0    | 6 |
| IPR003103      | 3.06 | 3.09  | 1    | 0    | 6 |
| IPR013115      | 1.05 | 1.21  | 1.03 | 1.08 | 6 |
| IPR013118      | 2.1  | 1.4   | 2.15 | 0    | 6 |
| IPR003774      | 1.09 | 3.36  | 1.03 | 0    | 6 |
| IPR003778      | 1.44 | 1     | 1.47 | 1    | 6 |
| IPR017930      | 1.95 | 1.95  | 0    | 0    | 6 |
| IPR004813      | 3.06 | 10.11 | 1.27 | 1.6  | 6 |
| IPR014744      | 1.67 | 1.67  | 0    | 0    | 6 |
| IPR014742      | 1.91 | 1.91  | 0    | 0    | 6 |
| PF11793        | 1.34 | 1.34  | 0    | 0    | 6 |
| IPR000056      | 1.24 | 1.55  | 1.21 | 1    | 6 |
| IPR019499      | 1.04 | 1.74  | 1.02 | 0    | 6 |
| IPR009297      | 1.04 | 1.1   | 1.04 | 1    | 6 |
| IPR018541      | 1.25 | 1     | 1.25 | 0    | 6 |
| PF12464        | 1.45 | 2.42  | 1.34 | 1.25 | 6 |
| IPR010572      | 1.43 | 0     | 1.43 | 0    | 6 |
| PF02160        | 3    | 3     | 0    | 0    | 6 |
| IPR007192      | 1.12 | 1.12  | 0    | 0    | 6 |
| IPR007194      | 3.26 | 3.29  | 0    | 1    | 6 |
| IPR013606      | 3.06 | 3.06  | 0    | 0    | 6 |
| IPR021257      | 1.05 | 0     | 1.05 | 0    | 6 |

|           |       |       |      |      |   |
|-----------|-------|-------|------|------|---|
| PF11716   | 4.4   | 0     | 4.4  | 0    | 6 |
| IPR003884 | 4.67  | 4.67  | 0    | 0    | 6 |
| IPR010722 | 1.43  | 1.16  | 1.45 | 1.56 | 6 |
| IPR010720 | 2.15  | 3.14  | 1.91 | 1    | 6 |
| IPR019568 | 1.14  | 1.16  | 1    | 0    | 6 |
| IPR015022 | 1.94  | 1.94  | 0    | 0    | 6 |
| IPR004923 | 1.24  | 1.84  | 1.18 | 1    | 6 |
| IPR005033 | 2.59  | 2.61  | 1    | 0    | 6 |
| IPR005631 | 1.05  | 1.23  | 1.02 | 0    | 6 |
| IPR013113 | 1.69  | 2     | 1.68 | 0    | 6 |
| IPR004223 | 1.06  | 1.44  | 1.05 | 1    | 6 |
| IPR018946 | 2     | 2.67  | 1.86 | 0    | 6 |
| IPR018941 | 3.2   | 3.2   | 0    | 0    | 6 |
| IPR009723 | 1.27  | 1.27  | 0    | 0    | 6 |
| IPR012948 | 1.84  | 1.84  | 0    | 0    | 6 |
| PF11901   | 3.86  | 4.77  | 1    | 0    | 6 |
| IPR022140 | 1.95  | 1.95  | 0    | 0    | 6 |
| IPR000083 | 29.82 | 29.82 | 0    | 0    | 6 |
| IPR002654 | 1.88  | 2.26  | 1.82 | 0    | 6 |
| IPR003728 | 1.04  | 2.33  | 1.02 | 0    | 6 |
| IPR003722 | 1.08  | 0     | 1.09 | 1    | 6 |
| IPR001767 | 1     | 1     | 1    | 0    | 6 |
| IPR017940 | 1     | 1     | 1    | 1    | 6 |
| IPR008521 | 3.51  | 4.04  | 1.19 | 0    | 6 |
| IPR001567 | 1.91  | 2.73  | 1.83 | 1.09 | 6 |
| IPR021128 | 7.51  | 7.51  | 0    | 0    | 6 |
| IPR021789 | 6.92  | 6.92  | 0    | 0    | 6 |
| IPR014770 | 1.8   | 1.8   | 0    | 0    | 6 |
| IPR019191 | 1.23  | 1.27  | 1.1  | 0    | 6 |
| IPR019443 | 1.31  | 1.31  | 0    | 0    | 6 |
| IPR018317 | 1.11  | 1     | 1.07 | 1.62 | 6 |
| PF05935   | 2.46  | 5.09  | 2.13 | 2.5  | 6 |
| IPR003036 | 4.2   | 4.2   | 0    | 0    | 6 |
| IPR010930 | 5.76  | 3.5   | 5.77 | 0    | 6 |
| IPR010939 | 17.06 | 17.06 | 0    | 0    | 6 |
| IPR008801 | 16.62 | 16.62 | 0    | 0    | 6 |
| PF04366   | 1.72  | 2.47  | 1.47 | 0    | 6 |
| IPR003442 | 1.03  | 1.5   | 1.02 | 0    | 6 |
| IPR009428 | 1.83  | 1.83  | 0    | 0    | 6 |
| IPR009224 | 5.33  | 5.33  | 0    | 0    | 6 |
| IPR007516 | 1.8   | 1.62  | 1.1  | 4    | 6 |
| IPR011637 | 2.73  | 1.67  | 2.76 | 2    | 6 |
| IPR021012 | 4.86  | 4.86  | 0    | 0    | 6 |
| IPR001148 | 3.67  | 8.67  | 1.08 | 0    | 6 |
| IPR004518 | 2.12  | 2.55  | 2.15 | 1.23 | 6 |
| IPR015154 | 3.8   | 3.8   | 0    | 0    | 6 |
| IPR010383 | 1.98  | 1     | 1.99 | 2    | 6 |
| IPR003173 | 1.32  | 1.37  | 1    | 0    | 6 |
| IPR004254 | 1.59  | 4.46  | 1.11 | 0    | 6 |
| IPR006634 | 5.9   | 5.9   | 0    | 0    | 6 |
| IPR003379 | 1.2   | 1.24  | 1.21 | 1    | 6 |
| IPR001268 | 1.5   | 1.37  | 1.5  | 1.66 | 6 |
| IPR018485 | 3.34  | 4.59  | 3.25 | 1.45 | 6 |
| IPR019012 | 1.15  | 1.2   | 1    | 1    | 6 |
| IPR006164 | 1.61  | 2.22  | 1.39 | 0    | 6 |
| IPR009342 | 1.99  | 0     | 1.99 | 2    | 6 |
| IPR008880 | 1.07  | 1.6   | 1.07 | 0    | 6 |
| IPR003855 | 2.06  | 8.17  | 1.45 | 1    | 6 |
| IPR007420 | 1.55  | 1.75  | 1.55 | 0    | 6 |
| IPR018876 | 1.82  | 0     | 1.82 | 0    | 6 |
| IPR001382 | 5.84  | 6.11  | 1    | 0    | 6 |
| PF12569   | 1.31  | 1.31  | 0    | 0    | 6 |
| IPR001037 | 5.33  | 5.33  | 0    | 0    | 6 |
| IPR019475 | 1.02  | 0     | 1.02 | 0    | 6 |
| PF04056   | 1.36  | 1.41  | 1    | 0    | 6 |
| IPR010401 | 1.26  | 1.18  | 1.29 | 1.33 | 6 |
| IPR001516 | 2.48  | 11.4  | 1.7  | 1.52 | 6 |
| IPR018154 | 11.22 | 11.22 | 0    | 0    | 6 |
| IPR012314 | 1.43  | 1.38  | 2    | 0    | 6 |

|                |       |       |      |      |   |
|----------------|-------|-------|------|------|---|
| IPR017890      | 2.34  | 2.34  | 0    | 0    | 6 |
| IPR005552      | 2.32  | 2.59  | 1    | 0    | 6 |
| IPR007547      | 1     | 1     | 1    | 1    | 6 |
| PF06983        | 1.88  | 1.07  | 1.92 | 1    | 6 |
| IPR004094      | 4.57  | 4.75  | 1    | 0    | 6 |
| IPR004097      | 1.05  | 1.16  | 1.02 | 1    | 6 |
| IPR002740      | 1.12  | 1.33  | 1.09 | 1.25 | 6 |
| IPR006034      | 1.42  | 1.83  | 1.4  | 1.07 | 6 |
| IPR022048      | 5.11  | 5.11  | 0    | 0    | 6 |
| IPR010515      | 1.96  | 2.05  | 1    | 0    | 6 |
| IPR020573      | 1.1   | 0     | 1.1  | 0    | 6 |
| TIGR01451      | 2.36  | 0     | 2.36 | 0    | 6 |
| IPR011663      | 3.89  | 2     | 3.9  | 0    | 6 |
| IPR013738      | 1.69  | 1     | 1.74 | 1    | 6 |
| IPR013820      | 1.06  | 1.26  | 1.04 | 1.1  | 6 |
| IPR005154      | 1.29  | 1.8   | 1.18 | 1    | 6 |
| IPR003322      | 8.67  | 8.67  | 0    | 0    | 6 |
| IPR007137      | 2.86  | 1     | 2.88 | 0    | 6 |
| IPR021147      | 1.14  | 0     | 1.14 | 0    | 6 |
| IPR006149      | 13.94 | 13.94 | 0    | 0    | 6 |
| IPR013552      | 2.89  | 0     | 2.89 | 0    | 6 |
| IPR010440      | 1.76  | 1.52  | 1.82 | 1    | 6 |
| IPR021647      | 2.08  | 2     | 2.08 | 0    | 6 |
| IPR013932      | 1.24  | 1.24  | 0    | 0    | 6 |
| IPR017927      | 1.18  | 1.43  | 1.04 | 1    | 6 |
| IPR017926      | 1.03  | 1.11  | 1.02 | 1    | 6 |
| IPR017921      | 1.31  | 1.31  | 0    | 0    | 6 |
| IPR008507      | 10.33 | 10.33 | 0    | 0    | 6 |
| PF03543        | 1.47  | 0     | 1.47 | 0    | 6 |
| IPR004865      | 9.6   | 9.6   | 0    | 0    | 6 |
| PF12344        | 1.01  | 1     | 1.01 | 1    | 6 |
| IPR008811      | 3.48  | 4.55  | 1.38 | 1.89 | 6 |
| IPR002212      | 30    | 30    | 0    | 0    | 6 |
| PF11414        | 1.89  | 1.89  | 0    | 0    | 6 |
| IPR001085      | 1.33  | 2.73  | 1.21 | 1.05 | 6 |
| IPR001086      | 1.14  | 2.24  | 1.08 | 1    | 6 |
| IPR008152      | 4.61  | 4.61  | 0    | 0    | 6 |
| IPR018379      | 5.96  | 5.96  | 0    | 0    | 6 |
| PTHR11254      | 1.2   | 1.2   | 0    | 0    | 6 |
| PTHR16166:SF25 | 1.67  | 1.67  | 0    | 0    | 6 |
| TIGR01376      | 2.75  | 0     | 2.75 | 0    | 6 |
| IPR013798      | 1.09  | 1.35  | 1.07 | 1.18 | 6 |
| IPR009674      | 1.19  | 1.19  | 0    | 0    | 6 |
| IPR007942      | 8.25  | 8.25  | 0    | 0    | 6 |
| IPR012855      | 1.78  | 0     | 1.78 | 0    | 6 |
| IPR007210      | 2.45  | 0     | 2.48 | 1.17 | 6 |
| IPR008795      | 6.04  | 6.04  | 0    | 0    | 6 |
| IPR006977      | 2.34  | 3.79  | 1.31 | 1.88 | 6 |
| IPR010734      | 2.69  | 2.69  | 0    | 0    | 6 |
| IPR010737      | 1.57  | 1.73  | 1.56 | 1    | 6 |
| IPR002058      | 4.03  | 4.03  | 0    | 0    | 6 |
| IPR019079      | 1.36  | 1.33  | 1.36 | 1.33 | 6 |
| IPR005625      | 2.32  | 2     | 2.32 | 0    | 6 |
| IPR003117      | 2.82  | 2.82  | 0    | 0    | 6 |
| IPR003118      | 7.12  | 7.12  | 0    | 0    | 6 |
| IPR013107      | 3.39  | 1     | 3.49 | 0    | 6 |
| IPR018951      | 1.56  | 1.65  | 1.56 | 1    | 6 |
| IPR009737      | 1.82  | 2.61  | 1.29 | 1    | 6 |
| IPR003500      | 1.45  | 1.23  | 1.47 | 1    | 6 |
| IPR019558      | 1.98  | 1.98  | 0    | 0    | 6 |
| IPR019559      | 4.88  | 4.88  | 0    | 0    | 6 |
| IPR018203      | 2.86  | 2.94  | 1    | 0    | 6 |
| IPR003837      | 1.04  | 1.31  | 1.02 | 1    | 6 |
| IPR000092      | 2.36  | 5.1   | 2.12 | 1.7  | 6 |
| IPR019411      | 2.48  | 2.48  | 0    | 0    | 6 |
| PTHR19222      | 1.17  | 1     | 1.18 | 1.2  | 6 |
| IPR016009      | 1.07  | 1.64  | 1.02 | 1    | 6 |
| IPR013182      | 2.23  | 2.23  | 0    | 0    | 6 |
| IPR004859      | 2.81  | 2.81  | 0    | 0    | 6 |

|           |       |       |      |      |   |
|-----------|-------|-------|------|------|---|
| IPR004906 | 1.92  | 1.92  | 0    | 0    | 6 |
| IPR011116 | 1.14  | 2.33  | 1.13 | 0    | 6 |
| IPR000627 | 2.83  | 3.96  | 2.69 | 1    | 6 |
| IPR007167 | 1.69  | 0     | 1.69 | 1.65 | 6 |
| IPR001576 | 1.14  | 2.16  | 1.04 | 1.11 | 6 |
| IPR011759 | 1.53  | 3.46  | 1.18 | 1    | 6 |
| IPR005735 | 11.3  | 11.3  | 0    | 0    | 6 |
| IPR001852 | 1.14  | 1.85  | 1.03 | 1    | 6 |
| IPR013263 | 2.01  | 0     | 2.01 | 0    | 6 |
| IPR008164 | 2.07  | 6.2   | 1.53 | 0    | 6 |
| PTHR12183 | 3.71  | 3.71  | 0    | 0    | 6 |
| PTHR22908 | 1     | 1     | 1    | 0    | 6 |
| IPR006096 | 1.63  | 2.63  | 1.5  | 1.57 | 6 |
| IPR010902 | 1.13  | 0     | 1.14 | 1    | 6 |
| IPR007053 | 2.31  | 5.78  | 1.31 | 0    | 6 |
| IPR008553 | 5.67  | 0     | 0    | 5.67 | 6 |
| IPR014015 | 1.15  | 1     | 1.17 | 1    | 6 |
| IPR007939 | 1.35  | 1     | 1.36 | 0    | 6 |
| IPR020046 | 1.19  | 2.11  | 1.08 | 0    | 6 |
| IPR020047 | 1.54  | 1.8   | 1.36 | 0    | 6 |
| IPR008457 | 1.53  | 1     | 1.53 | 1.5  | 6 |
| IPR008456 | 3.29  | 0     | 3.29 | 0    | 6 |
| IPR006946 | 10.11 | 14.67 | 1    | 0    | 6 |
| IPR005079 | 1.23  | 1.45  | 1.16 | 1    | 6 |
| PF11547   | 1     | 1     | 0    | 0    | 6 |
| PF11543   | 1.22  | 1.23  | 1    | 0    | 6 |
| IPR011601 | 1.06  | 1.33  | 1.06 | 1    | 6 |
| IPR003228 | 1.55  | 1.55  | 0    | 0    | 6 |
| IPR008331 | 2.42  | 4.53  | 2.33 | 1.37 | 6 |
| IPR008332 | 1.41  | 1.4   | 1.41 | 1    | 6 |
| IPR015143 | 1.57  | 1.57  | 0    | 0    | 6 |
| IPR015149 | 1.43  | 1.43  | 0    | 0    | 6 |
| IPR007739 | 1.46  | 1     | 1.47 | 0    | 6 |
| IPR007267 | 1.62  | 1     | 1.65 | 1.13 | 6 |
| IPR015404 | 3.66  | 3.7   | 1    | 0    | 6 |
| IPR015406 | 1.97  | 0     | 1.97 | 0    | 6 |
| IPR015403 | 2.42  | 2.42  | 0    | 0    | 6 |
| IPR019452 | 1.41  | 1.41  | 0    | 0    | 6 |
| IPR013563 | 7.77  | 1.5   | 7.88 | 6.21 | 6 |
| IPR019456 | 1.2   | 1.8   | 1.18 | 0    | 6 |
| IPR005345 | 1.16  | 1.16  | 0    | 0    | 6 |
| PTHR23416 | 1.42  | 2.23  | 1.4  | 1.11 | 6 |
| IPR002523 | 2.3   | 8.12  | 1.85 | 1.47 | 6 |
| IPR010482 | 2.41  | 2.41  | 0    | 0    | 6 |
| IPR003308 | 3.4   | 3.4   | 0    | 0    | 6 |
| IPR012590 | 1.18  | 1.18  | 0    | 0    | 6 |
| IPR021835 | 1.06  | 0     | 1.05 | 1.33 | 6 |
| IPR003840 | 1.5   | 2     | 1.2  | 0    | 6 |
| PF11941   | 1.18  | 0     | 1.18 | 0    | 6 |
| IPR022100 | 1.11  | 1.11  | 0    | 0    | 6 |
| IPR019583 | 7.6   | 7.6   | 0    | 0    | 6 |
| IPR001398 | 1.71  | 2.31  | 1    | 0    | 6 |
| IPR019406 | 3.27  | 3.27  | 0    | 0    | 6 |
| IPR010403 | 1.99  | 1     | 2    | 2    | 6 |
| IPR022310 | 2.04  | 1.94  | 2.03 | 2.43 | 6 |
| IPR005811 | 2.47  | 4.42  | 2.25 | 2    | 6 |
| IPR000494 | 11.67 | 11.95 | 1    | 0    | 6 |
| IPR017903 | 7.14  | 7.14  | 0    | 0    | 6 |
| IPR014027 | 2     | 2.09  | 2    | 1.88 | 6 |
| IPR001529 | 1.79  | 1.95  | 1    | 1.5  | 6 |
| IPR001888 | 3     | 3     | 0    | 0    | 6 |
| IPR002093 | 6.89  | 7.22  | 1    | 0    | 6 |
| IPR019316 | 2.83  | 7.4   | 1.08 | 0    | 6 |
| IPR015153 | 4.72  | 4.72  | 0    | 0    | 6 |
| IPR004314 | 24.45 | 33.12 | 1.33 | 0    | 6 |
| IPR015800 | 2.47  | 4.41  | 1.25 | 1    | 6 |
| IPR001101 | 35.47 | 35.47 | 0    | 0    | 6 |
| IPR021586 | 1.57  | 0     | 1.45 | 2    | 6 |
| IPR015116 | 2.71  | 2.71  | 0    | 0    | 6 |

|                |       |       |       |      |   |
|----------------|-------|-------|-------|------|---|
| IPR022125      | 1.04  | 1.04  | 0     | 0    | 6 |
| IPR022212      | 10    | 10    | 0     | 0    | 6 |
| IPR007817      | 1.29  | 1.57  | 1.07  | 0    | 6 |
| IPR007237      | 6.37  | 6.37  | 0     | 0    | 6 |
| IPR019396      | 2.58  | 2.63  | 1     | 0    | 6 |
| IPR005493      | 1.88  | 1.95  | 1.93  | 1    | 6 |
| IPR006910      | 2.28  | 2.28  | 0     | 0    | 6 |
| IPR015387      | 1     | 0     | 1     | 0    | 6 |
| IPR015008      | 1.56  | 1.56  | 0     | 0    | 6 |
| IPR010264      | 24.83 | 24.83 | 0     | 0    | 6 |
| IPR007717      | 1.33  | 1.33  | 0     | 0    | 6 |
| IPR015190      | 1.02  | 0     | 1.02  | 0    | 6 |
| IPR009038      | 4.79  | 4.79  | 0     | 0    | 6 |
| IPR003131      | 3.31  | 3.31  | 0     | 0    | 6 |
| IPR005160      | 1.53  | 1.53  | 0     | 0    | 6 |
| IPR003334      | 8     | 8     | 0     | 0    | 6 |
| IPR006677      | 1.91  | 2.01  | 0     | 1.74 | 6 |
| IPR003489      | 1.36  | 2.11  | 1.35  | 1    | 6 |
| IPR019572      | 3.53  | 3.53  | 0     | 0    | 6 |
| IPR015010      | 1.29  | 1.29  | 0     | 0    | 6 |
| IPR010795      | 1.68  | 1.68  | 0     | 0    | 6 |
| IPR000890      | 1.57  | 1.19  | 1.59  | 1    | 6 |
| IPR000897      | 1.41  | 1.72  | 1.32  | 1    | 6 |
| IPR007374      | 1.53  | 1.7   | 1.46  | 2.05 | 6 |
| IPR003697      | 1.48  | 1.63  | 1.47  | 1    | 6 |
| IPR002642      | 3.5   | 3.5   | 0     | 0    | 6 |
| IPR013989      | 10.67 | 13.43 | 1     | 0    | 6 |
| IPR003718      | 2.8   | 1.43  | 2.87  | 1.45 | 6 |
| IPR013709      | 1.48  | 1.35  | 1.48  | 1.47 | 6 |
| IPR008532      | 1.29  | 2.16  | 1.09  | 1.02 | 6 |
| IPR010661      | 4.67  | 4.67  | 0     | 0    | 6 |
| IPR013243      | 1.62  | 1.62  | 0     | 0    | 6 |
| IPR005516      | 20.71 | 20.71 | 0     | 0    | 6 |
| IPR006896      | 5.3   | 5.3   | 0     | 0    | 6 |
| IPR000911      | 1.14  | 2.57  | 1     | 1    | 6 |
| IPR010929      | 6.89  | 6.89  | 0     | 0    | 6 |
| IPR012437      | 1.41  | 0     | 1.35  | 2    | 6 |
| IPR001134      | 1     | 1     | 0     | 0    | 6 |
| IPR007209      | 1.97  | 2.14  | 0     | 1.71 | 6 |
| PF12143        | 7.43  | 8.5   | 1     | 0    | 6 |
| IPR006969      | 5.25  | 5.22  | 5.29  | 0    | 6 |
| TIGR03660      | 11.56 | 0     | 11.56 | 0    | 6 |
| IPR009234      | 2.33  | 2.33  | 0     | 0    | 6 |
| IPR009232      | 1.33  | 1.33  | 0     | 0    | 6 |
| IPR002939      | 2.48  | 8.88  | 1.83  | 1.16 | 6 |
| PF02311        | 4.76  | 1     | 4.79  | 0    | 6 |
| IPR008629      | 2.62  | 1.33  | 2.94  | 0    | 6 |
| IPR011629      | 2.37  | 2.32  | 2.37  | 2.67 | 6 |
| IPR022087      | 4.17  | 5.11  | 1.33  | 0    | 6 |
| PF04193        | 2.54  | 3.88  | 1.41  | 1.2  | 6 |
| IPR013136      | 1.23  | 1.23  | 1     | 0    | 6 |
| IPR005202      | 60.5  | 69    | 1     | 0    | 6 |
| IPR020536      | 1.05  | 2     | 1.02  | 1.23 | 6 |
| IPR008646      | 1.19  | 1.19  | 0     | 0    | 6 |
| IPR017852      | 1.88  | 1.88  | 0     | 0    | 6 |
| IPR012961      | 1.62  | 2.55  | 1.01  | 0    | 6 |
| PF11926        | 19.71 | 19.71 | 0     | 0    | 6 |
| PTHR22814      | 3.5   | 3.5   | 0     | 0    | 6 |
| IPR007854      | 1.34  | 1.34  | 0     | 0    | 6 |
| IPR013547      | 12.52 | 12.52 | 0     | 0    | 6 |
| IPR015255      | 3.61  | 3.61  | 0     | 0    | 6 |
| IPR001747      | 4.81  | 4.85  | 4     | 0    | 6 |
| PTHR23083:SF16 | 1.03  | 1     | 1.03  | 0    | 6 |
| IPR012062      | 1.24  | 1     | 1.25  | 0    | 6 |
| IPR001580      | 3.02  | 3.05  | 0     | 1    | 6 |
| IPR021810      | 1.1   | 1     | 1.1   | 1.11 | 6 |
| IPR005467      | 1     | 0     | 1     | 0    | 6 |
| IPR006343      | 2.29  | 1     | 2.29  | 0    | 6 |
| IPR013270      | 2     | 2     | 0     | 0    | 6 |

|           |       |       |       |      |   |
|-----------|-------|-------|-------|------|---|
| IPR006714 | 2.05  | 0     | 2.05  | 0    | 6 |
| IPR016072 | 2.16  | 2.16  | 0     | 0    | 6 |
| IPR008543 | 8.4   | 8.4   | 0     | 0    | 6 |
| IPR008541 | 5.28  | 0     | 5.28  | 0    | 6 |
| IPR005194 | 1.35  | 1.06  | 1.38  | 0    | 6 |
| IPR005199 | 2.92  | 4.36  | 1.09  | 0    | 6 |
| IPR001365 | 1.98  | 5.11  | 1.32  | 1    | 6 |
| IPR007901 | 1.36  | 1.13  | 1.4   | 1.23 | 5 |
| IPR020580 | 2.08  | 2.43  | 2.04  | 1.78 | 5 |
| IPR018144 | 2     | 2     | 0     | 0    | 5 |
| IPR018145 | 2.16  | 0     | 2.16  | 0    | 5 |
| IPR021893 | 2.87  | 2.87  | 0     | 0    | 5 |
| IPR021896 | 4.11  | 4.11  | 0     | 0    | 5 |
| IPR006692 | 2.65  | 2.65  | 0     | 0    | 5 |
| IPR003466 | 2.09  | 2.74  | 1     | 0    | 5 |
| PTHR12326 | 2.26  | 2.26  | 0     | 0    | 5 |
| IPR017748 | 1.21  | 0     | 1.21  | 0    | 5 |
| IPR007631 | 1.07  | 0     | 1.07  | 0    | 5 |
| IPR007632 | 3.3   | 3.3   | 0     | 0    | 5 |
| IPR007639 | 1.34  | 1.34  | 0     | 0    | 5 |
| IPR019175 | 1.18  | 1.18  | 0     | 0    | 5 |
| PF03693   | 1.56  | 1     | 1.6   | 1    | 5 |
| PF10388   | 1.11  | 0     | 1.11  | 0    | 5 |
| PTHR22990 | 1.25  | 1.5   | 1.2   | 1    | 5 |
| IPR000741 | 1.88  | 4.15  | 1.08  | 0    | 5 |
| IPR000740 | 1.16  | 1.69  | 1.1   | 1.25 | 5 |
| IPR001602 | 1.28  | 1.19  | 1.3   | 1.22 | 5 |
| PF12436   | 1.52  | 1.52  | 0     | 0    | 5 |
| IPR001163 | 1.24  | 1.96  | 1.15  | 1    | 5 |
| IPR013657 | 4.42  | 4.42  | 0     | 0    | 5 |
| IPR004700 | 2.6   | 1     | 2.62  | 1    | 5 |
| IPR004704 | 2.56  | 1     | 2.58  | 1    | 5 |
| IPR016477 | 1.2   | 1.81  | 1.08  | 1    | 5 |
| IPR021991 | 3.43  | 3.43  | 0     | 0    | 5 |
| IPR002989 | 50    | 1.92  | 91.21 | 0    | 5 |
| IPR005358 | 2.1   | 2     | 2.06  | 2.49 | 5 |
| IPR002515 | 8.81  | 8.81  | 0     | 0    | 5 |
| PF12013   | 11.78 | 11.78 | 0     | 0    | 5 |
| IPR002710 | 1.56  | 1.62  | 1     | 0    | 5 |
| IPR008598 | 3.67  | 3.67  | 0     | 0    | 5 |
| IPR005147 | 1.04  | 1.27  | 1.02  | 1    | 5 |
| IPR000712 | 6     | 6     | 0     | 0    | 5 |
| PF05402   | 1.17  | 0     | 1.18  | 1.07 | 5 |
| IPR015269 | 1.01  | 1     | 1.01  | 1.06 | 5 |
| IPR003314 | 1.47  | 0     | 1.47  | 0    | 5 |
| IPR000667 | 1.18  | 1     | 1.18  | 1    | 5 |
| IPR007125 | 1.58  | 1.62  | 0     | 1    | 5 |
| IPR001204 | 1.48  | 1.94  | 1.4   | 1.93 | 5 |
| IPR013800 | 4.82  | 4.82  | 0     | 0    | 5 |
| IPR013801 | 4.79  | 4.79  | 0     | 0    | 5 |
| TIGR01643 | 1.36  | 1     | 1.5   | 0    | 5 |
| IPR018708 | 1.06  | 0     | 1.06  | 1    | 5 |
| IPR021652 | 1.53  | 0     | 1.56  | 1.22 | 5 |
| IPR013117 | 1     | 0     | 1     | 0    | 5 |
| PTHR11614 | 1.13  | 1.14  | 1.13  | 0    | 5 |
| PTHR11615 | 1     | 1     | 1     | 1    | 5 |
| IPR001286 | 1.56  | 1.33  | 2     | 0    | 5 |
| IPR002164 | 4.56  | 4.56  | 0     | 0    | 5 |
| IPR013029 | 1.06  | 1.47  | 1.02  | 0    | 5 |
| IPR013025 | 1.15  | 2.56  | 1.02  | 1    | 5 |
| IPR019302 | 1.06  | 1     | 1.07  | 1    | 5 |
| IPR009454 | 1.88  | 1.88  | 0     | 0    | 5 |
| IPR002208 | 1.18  | 2.26  | 1.08  | 1    | 5 |
| IPR002202 | 1.29  | 1.83  | 1.09  | 1.07 | 5 |
| PF11429   | 1     | 0     | 1     | 0    | 5 |
| IPR000055 | 3.64  | 0     | 3.65  | 3.35 | 5 |
| IPR013223 | 1.12  | 0     | 1.12  | 0    | 5 |
| IPR011524 | 3.08  | 3.08  | 0     | 0    | 5 |
| IPR010940 | 1.05  | 1.38  | 1.01  | 0    | 5 |

|           |       |       |       |      |   |
|-----------|-------|-------|-------|------|---|
| IPR022029 | 2.33  | 0     | 2.33  | 0    | 5 |
| IPR004899 | 3.09  | 1     | 3.12  | 0    | 5 |
| IPR006865 | 12.67 | 12.67 | 0     | 0    | 5 |
| PF09684   | 1.35  | 1     | 1.35  | 0    | 5 |
| IPR006573 | 7.85  | 8.4   | 1     | 0    | 5 |
| PF04331   | 1.25  | 0     | 1.25  | 0    | 5 |
| PF08488   | 10    | 10    | 0     | 0    | 5 |
| IPR013601 | 11.29 | 20.64 | 1     | 0    | 5 |
| IPR013609 | 3.09  | 0     | 3.09  | 0    | 5 |
| IPR000164 | 5.01  | 5.01  | 0     | 0    | 5 |
| PF11717   | 2.36  | 2.46  | 1.4   | 0    | 5 |
| IPR006900 | 4.7   | 4.7   | 0     | 0    | 5 |
| IPR009215 | 1.27  | 1.06  | 1.35  | 0    | 5 |
| IPR007528 | 1.33  | 1.33  | 0     | 0    | 5 |
| IPR005039 | 1.43  | 0     | 1.43  | 0    | 5 |
| IPR002560 | 2.98  | 23    | 2.9   | 1.67 | 5 |
| IPR011640 | 1.29  | 0     | 1.28  | 1.48 | 5 |
| IPR020822 | 1.26  | 1.22  | 1.29  | 0    | 5 |
| IPR008379 | 3.48  | 3.48  | 0     | 0    | 5 |
| IPR005637 | 1.52  | 1.52  | 0     | 0    | 5 |
| PF05756   | 2     | 2.43  | 1     | 0    | 5 |
| IPR013809 | 4.9   | 4.9   | 0     | 0    | 5 |
| IPR003106 | 15.58 | 20.44 | 1     | 1    | 5 |
| PS50850   | 1.13  | 1.12  | 1.12  | 1.5  | 5 |
| IPR008037 | 5.75  | 5.75  | 0     | 0    | 5 |
| PTHR23172 | 1.27  | 1.27  | 0     | 0    | 5 |
| IPR006640 | 1.19  | 2.09  | 1.02  | 1    | 5 |
| IPR001870 | 2     | 2     | 0     | 0    | 5 |
| IPR013685 | 1.02  | 0     | 1.02  | 0    | 5 |
| IPR015020 | 1.46  | 0     | 1.46  | 0    | 5 |
| IPR003806 | 1.5   | 1.4   | 1.43  | 2.37 | 5 |
| PTHR23036 | 2.77  | 2.77  | 0     | 0    | 5 |
| IPR021419 | 1.59  | 1.59  | 0     | 0    | 5 |
| IPR007834 | 1.29  | 1.29  | 0     | 0    | 5 |
| IPR018538 | 1.43  | 0     | 1.32  | 1.69 | 5 |
| IPR002653 | 5.66  | 5.66  | 0     | 0    | 5 |
| IPR015273 | 1.05  | 1.12  | 1.05  | 1.02 | 5 |
| IPR003729 | 1.19  | 4.25  | 1.08  | 1.04 | 5 |
| IPR013191 | 1.07  | 0     | 1.07  | 0    | 5 |
| IPR013197 | 1.16  | 1.16  | 1     | 1    | 5 |
| IPR011125 | 2.13  | 2     | 2.15  | 1.97 | 5 |
| IPR010657 | 2.14  | 1     | 2.15  | 0    | 5 |
| TIGR02913 | 5.62  | 1     | 5.93  | 0    | 5 |
| PF11852   | 1.13  | 1.2   | 1.12  | 0    | 5 |
| IPR014773 | 1.06  | 0     | 1.06  | 0    | 5 |
| PTHR18359 | 1.05  | 1.05  | 1     | 0    | 5 |
| IPR013011 | 1.35  | 0     | 1.35  | 0    | 5 |
| IPR007380 | 1.02  | 0     | 1.02  | 1    | 5 |
| IPR015967 | 1.02  | 1     | 1.02  | 0    | 5 |
| IPR008172 | 1.27  | 1.59  | 1.25  | 1.11 | 5 |
| IPR005524 | 1.59  | 1     | 1.57  | 1.84 | 5 |
| IPR013938 | 1     | 1     | 0     | 0    | 5 |
| IPR003035 | 10.42 | 11.27 | 1     | 0    | 5 |
| IPR019832 | 1.54  | 2.76  | 1.39  | 1.23 | 5 |
| IPR004352 | 1.45  | 1.27  | 1.49  | 1.33 | 5 |
| PTHR10849 | 1.15  | 1     | 1.14  | 1.33 | 5 |
| IPR011500 | 6.78  | 6.78  | 0     | 0    | 5 |
| IPR007024 | 1.59  | 0     | 1.59  | 0    | 5 |
| IPR018169 | 5.47  | 12.18 | 1.17  | 1    | 5 |
| IPR005024 | 7.67  | 8.43  | 0     | 1.8  | 5 |
| IPR013097 | 1.97  | 5.19  | 1.39  | 1    | 5 |
| IPR013092 | 13.15 | 13.15 | 0     | 0    | 5 |
| PF12130   | 3.65  | 3.65  | 0     | 0    | 5 |
| IPR017801 | 14.67 | 0     | 14.67 | 0    | 5 |
| IPR002073 | 3.62  | 3.62  | 0     | 0    | 5 |
| IPR019515 | 1.83  | 1.86  | 1     | 0    | 5 |
| IPR018931 | 1.04  | 0     | 1.04  | 0    | 5 |
| IPR010430 | 1.14  | 0     | 1.14  | 1.12 | 5 |
| IPR003378 | 6.34  | 6.34  | 0     | 0    | 5 |



|                |       |       |      |      |   |
|----------------|-------|-------|------|------|---|
| IPR007273      | 3.79  | 3.79  | 0    | 0    | 5 |
| IPR001266      | 1.39  | 1.63  | 0    | 1    | 5 |
| IPR021074      | 1.01  | 0     | 1.01 | 0    | 5 |
| IPR002762      | 2.2   | 1.62  | 2.23 | 2.11 | 5 |
| IPR014811      | 4.46  | 4.46  | 0    | 0    | 5 |
| IPR014812      | 3.53  | 3.57  | 0    | 1    | 5 |
| PF11934        | 2.21  | 2.21  | 0    | 0    | 5 |
| PF11931        | 1.15  | 1.15  | 0    | 0    | 5 |
| PF02709        | 4.29  | 5.22  | 1    | 0    | 5 |
| IPR007591      | 3.45  | 3.45  | 0    | 0    | 5 |
| IPR010808      | 1.24  | 0     | 1.2  | 1.47 | 5 |
| IPR013577      | 2.92  | 2.92  | 0    | 0    | 5 |
| IPR013575      | 1.02  | 0     | 1.02 | 0    | 5 |
| IPR004028      | 1.75  | 4     | 1    | 0    | 5 |
| IPR005377      | 2.13  | 2.13  | 0    | 0    | 5 |
| IPR004977      | 1.47  | 1.59  | 0    | 1    | 5 |
| PF12074        | 1.27  | 1.27  | 0    | 0    | 5 |
| IPR006855      | 1.63  | 2     | 1    | 0    | 5 |
| IPR010497      | 2.34  | 2.48  | 2.28 | 1    | 5 |
| IPR013190      | 1     | 0     | 1    | 0    | 5 |
| IPR003723      | 1.03  | 0     | 1.03 | 1    | 5 |
| IPR015224      | 1.41  | 1.41  | 0    | 0    | 5 |
| IPR001757      | 1.75  | 2.12  | 1    | 0    | 5 |
| IPR005122      | 2.15  | 2.24  | 2.16 | 1.79 | 5 |
| IPR021807      | 1.15  | 1     | 1.15 | 0    | 5 |
| IPR003852      | 1.11  | 0     | 1.11 | 1    | 5 |
| IPR014898      | 1.3   | 1.3   | 0    | 0    | 5 |
| IPR014891      | 1.67  | 1.67  | 0    | 0    | 5 |
| IPR004192      | 1.31  | 1.31  | 0    | 0    | 5 |
| IPR018877      | 1.29  | 0     | 1.29 | 0    | 5 |
| IPR018878      | 1.17  | 0     | 1.17 | 0    | 5 |
| IPR014914      | 1.77  | 0     | 1.77 | 0    | 5 |
| IPR021537      | 4.44  | 4.44  | 0    | 0    | 5 |
| IPR009628      | 1.63  | 1     | 1.64 | 0    | 5 |
| IPR010621      | 2.05  | 1.6   | 2.1  | 1.2  | 5 |
| PF08236        | 1     | 1     | 0    | 0    | 5 |
| IPR001518      | 1.09  | 1.31  | 1.08 | 1    | 5 |
| IPR021884      | 2.14  | 1     | 1.78 | 6    | 5 |
| IPR004328      | 3.68  | 3.68  | 0    | 0    | 5 |
| PTHR21089      | 1.08  | 1.38  | 1.06 | 0    | 5 |
| IPR009470      | 1.11  | 1     | 1.11 | 0    | 5 |
| IPR009471      | 5     | 5     | 0    | 0    | 5 |
| IPR005798      | 2.64  | 12.24 | 1.07 | 1.2  | 5 |
| IPR013201      | 14.13 | 14.13 | 0    | 0    | 5 |
| IPR001303      | 2.5   | 3.32  | 2.5  | 1.03 | 5 |
| IPR012561      | 2.36  | 2.36  | 0    | 0    | 5 |
| IPR002028      | 1.07  | 1.66  | 1.04 | 1    | 5 |
| IPR000539      | 7.3   | 7.3   | 0    | 0    | 5 |
| IPR022040      | 1     | 1     | 0    | 0    | 5 |
| IPR010511      | 1.1   | 0     | 1.1  | 0    | 5 |
| IPR010513      | 1.52  | 1.52  | 0    | 0    | 5 |
| IPR007992      | 1.35  | 1.35  | 0    | 0    | 5 |
| IPR006599      | 3.91  | 3.91  | 0    | 0    | 5 |
| IPR010703      | 3.61  | 3.66  | 1    | 0    | 5 |
| PTHR23172:SF19 | 1.07  | 1.07  | 0    | 0    | 5 |
| IPR000807      | 1.03  | 1.22  | 1.02 | 1.02 | 5 |
| IPR014824      | 1.23  | 1.34  | 1.18 | 0    | 5 |
| IPR021478      | 1.73  | 0     | 1.75 | 1    | 5 |
| IPR001666      | 2.67  | 2.67  | 0    | 0    | 5 |
| IPR001661      | 1.81  | 2.25  | 1.61 | 1    | 5 |
| IPR004908      | 1.34  | 1.34  | 0    | 0    | 5 |
| IPR009535      | 1.73  | 1.73  | 0    | 0    | 5 |
| IPR009537      | 1.22  | 0     | 1.24 | 1.1  | 5 |
| IPR011666      | 1.11  | 1.11  | 0    | 0    | 5 |
| IPR007700      | 11    | 11    | 0    | 0    | 5 |
| IPR019041      | 13    | 13    | 0    | 0    | 5 |
| IPR005616      | 1.35  | 1.14  | 1.35 | 0    | 5 |
| IPR011464      | 1.6   | 0     | 1.6  | 0    | 5 |
| IPR002838      | 1.51  | 2.03  | 1.47 | 1.22 | 5 |

|               |       |       |      |      |   |
|---------------|-------|-------|------|------|---|
| IPR002833     | 1.63  | 2.2   | 1.05 | 1    | 5 |
| IPR013173     | 1.02  | 1     | 1.02 | 0    | 5 |
| IPR018961     | 1.12  | 1.12  | 1.12 | 0    | 5 |
| IPR003492     | 1.83  | 1.83  | 0    | 0    | 5 |
| IPR020631     | 1.23  | 2.61  | 1.11 | 1    | 5 |
| IPR008213     | 5.33  | 0     | 5.33 | 0    | 5 |
| IPR015009     | 2.04  | 2.04  | 0    | 0    | 5 |
| PTHR10799     | 1.14  | 1.1   | 1.17 | 0    | 5 |
| IPR000883     | 2.72  | 5     | 2.49 | 3.06 | 5 |
| IPR000885     | 6.82  | 6.82  | 0    | 0    | 5 |
| IPR012923     | 1.13  | 1.13  | 0    | 0    | 5 |
| PTHR19328:SF6 | 1.21  | 0     | 1.21 | 0    | 5 |
| IPR007810     | 1.12  | 1.12  | 0    | 0    | 5 |
| IPR007813     | 1.18  | 1     | 1.18 | 0    | 5 |
| TIGR02098     | 1.44  | 0     | 1.44 | 0    | 5 |
| PTHR22954     | 8.19  | 8.19  | 0    | 0    | 5 |
| IPR000962     | 1.92  | 0     | 1.94 | 1.25 | 5 |
| IPR003703     | 2.59  | 3.18  | 2.5  | 0    | 5 |
| IPR004864     | 2.19  | 5.78  | 1.41 | 1    | 5 |
| IPR010675     | 2.05  | 2.05  | 0    | 0    | 5 |
| IPR010679     | 2.04  | 2     | 2.08 | 1.2  | 5 |
| IPR022412     | 1.22  | 1.09  | 1.2  | 1.63 | 5 |
| IPR021852     | 2.89  | 2.89  | 0    | 0    | 5 |
| IPR011703     | 1.83  | 1.08  | 1.86 | 1.72 | 5 |
| IPR002159     | 8.79  | 8.79  | 0    | 0    | 5 |
| IPR007477     | 7.29  | 7.29  | 0    | 0    | 5 |
| IPR007474     | 1.16  | 2.19  | 1.02 | 0    | 5 |
| IPR009448     | 1.52  | 1.52  | 0    | 0    | 5 |
| PF11412       | 1.24  | 0     | 1.24 | 0    | 5 |
| IPR013230     | 1.39  | 1     | 1.4  | 0    | 5 |
| IPR013580     | 1.4   | 1     | 1.41 | 0    | 5 |
| IPR015321     | 9.5   | 9.5   | 0    | 0    | 5 |
| IPR011513     | 1.15  | 1.15  | 0    | 0    | 5 |
| IPR011515     | 1.25  | 1.25  | 0    | 0    | 5 |
| IPR013915     | 1.22  | 1.22  | 0    | 0    | 5 |
| IPR013799     | 4.92  | 4.92  | 0    | 0    | 5 |
| IPR001129     | 1.72  | 3.03  | 1.4  | 0    | 5 |
| IPR022039     | 1.03  | 1.03  | 0    | 0    | 5 |
| IPR010547     | 2.06  | 2.89  | 1.12 | 0    | 5 |
| IPR007949     | 1.2   | 1.2   | 0    | 0    | 5 |
| IPR007212     | 1.09  | 0     | 1.06 | 1.12 | 5 |
| IPR012896     | 3.24  | 3.24  | 0    | 0    | 5 |
| IPR001378     | 1.23  | 1.38  | 1.16 | 1.62 | 5 |
| IPR018660     | 1.16  | 0     | 1.16 | 0    | 5 |
| IPR005653     | 1.74  | 1     | 1.74 | 0    | 5 |
| IPR002054     | 1.36  | 2.34  | 1.01 | 1    | 5 |
| IPR009976     | 1.89  | 1.91  | 1    | 0    | 5 |
| IPR007533     | 1.04  | 1.13  | 1.01 | 0    | 5 |
| PTHR13572     | 1.41  | 1.45  | 1    | 0    | 5 |
| IPR011417     | 2.17  | 2.17  | 0    | 0    | 5 |
| IPR013819     | 6.29  | 9.16  | 1.81 | 0    | 5 |
| IPR003110     | 9.56  | 9.56  | 0    | 0    | 5 |
| IPR003113     | 2.12  | 2.12  | 0    | 0    | 5 |
| IPR013341     | 3.42  | 1.95  | 3.49 | 4.89 | 5 |
| IPR013699     | 1.14  | 1.14  | 0    | 0    | 5 |
| IPR012560     | 1.67  | 1.67  | 0    | 0    | 5 |
| IPR001240     | 1.08  | 1.56  | 1.05 | 1.05 | 5 |
| IPR011118     | 2.19  | 6     | 1.43 | 0    | 5 |
| PF01930       | 1.59  | 1     | 1.47 | 2.21 | 5 |
| IPR019555     | 3.83  | 3.83  | 0    | 0    | 5 |
| PTHR14596     | 3.24  | 3.3   | 0    | 1    | 5 |
| IPR012954     | 1.18  | 1.18  | 0    | 0    | 5 |
| TIGR01764     | 1.54  | 0     | 1.54 | 1.75 | 5 |
| IPR006199     | 1.18  | 0     | 1.18 | 1    | 5 |
| IPR013557     | 1.37  | 1     | 1.38 | 0    | 5 |
| IPR004954     | 2.31  | 1     | 2.39 | 0    | 5 |
| IPR018502     | 24.22 | 24.88 | 2    | 0    | 5 |
| PF10344       | 1.39  | 1.39  | 0    | 0    | 5 |
| IPR015240     | 1.01  | 1     | 1.01 | 0    | 5 |

|                |       |       |      |      |   |
|----------------|-------|-------|------|------|---|
| IPR006768      | 1.91  | 1.93  | 1    | 0    | 5 |
| IPR003198      | 1.41  | 1.7   | 1.38 | 1.31 | 5 |
| IPR004854      | 2.12  | 2.12  | 0    | 0    | 5 |
| IPR005100      | 1.43  | 1.52  | 0    | 1    | 5 |
| IPR011114      | 1.02  | 0     | 1.02 | 1    | 5 |
| PTHR23155:SF21 | 6     | 8.33  | 1.33 | 0    | 5 |
| IPR001577      | 6.92  | 7.97  | 1    | 0    | 5 |
| IPR021131      | 1.3   | 3.54  | 1    | 2.02 | 5 |
| IPR021134      | 3.26  | 3.93  | 1.4  | 0    | 5 |
| IPR021869      | 2.4   | 2.89  | 1    | 1    | 5 |
| IPR021868      | 1     | 0     | 1    | 0    | 5 |
| IPR008858      | 1.47  | 1.91  | 1.21 | 0    | 5 |
| IPR001857      | 1.05  | 1.39  | 1.02 | 0    | 5 |
| IPR006114      | 1.4   | 2.01  | 1.32 | 1    | 5 |
| IPR008166      | 4.95  | 7.77  | 1.29 | 0    | 5 |
| IPR002629      | 1.47  | 2.44  | 1.41 | 1.18 | 5 |
| IPR018584      | 2.76  | 0     | 2.83 | 1.14 | 5 |
| IPR003440      | 4.38  | 4.38  | 0    | 0    | 5 |
| IPR010292      | 1.03  | 1     | 1.03 | 0    | 5 |
| IPR002773      | 1.24  | 1.39  | 1.08 | 1.2  | 5 |
| IPR000932      | 5.48  | 5.11  | 5.57 | 0    | 5 |
| IPR007052      | 1.06  | 1.09  | 0    | 1    | 5 |
| IPR008554      | 1.03  | 1.1   | 1.02 | 1    | 5 |
| IPR005184      | 1.38  | 4     | 1.34 | 3    | 5 |
| IPR007930      | 7.33  | 7.33  | 0    | 0    | 5 |
| PF10881        | 1.22  | 0     | 1.22 | 0    | 5 |
| PF11130        | 1.47  | 0     | 1.47 | 0    | 5 |
| IPR020598      | 1.11  | 1.71  | 1.06 | 1    | 5 |
| PTHR11412      | 1.15  | 0     | 1.15 | 0    | 5 |
| IPR012968      | 1.7   | 1.7   | 0    | 0    | 5 |
| IPR006948      | 6.14  | 6.14  | 0    | 0    | 5 |
| IPR012135      | 1.4   | 2.07  | 1.35 | 1.04 | 5 |
| IPR012131      | 1.12  | 1.37  | 1.11 | 1    | 5 |
| IPR000519      | 5.06  | 5.06  | 0    | 0    | 5 |
| IPR011602      | 1.58  | 1.9   | 1    | 1    | 5 |
| IPR013724      | 2.56  | 2.56  | 0    | 0    | 5 |
| IPR021006      | 1.32  | 1.32  | 0    | 0    | 5 |
| IPR010399      | 19.62 | 19.62 | 0    | 0    | 5 |
| IPR007963      | 1.2   | 0     | 1.21 | 1    | 5 |
| IPR007391      | 1.75  | 0     | 1.75 | 0    | 5 |
| IPR003386      | 2.42  | 3.13  | 1.03 | 0    | 5 |
| IPR007269      | 1.58  | 1.79  | 1.54 | 1.5  | 5 |
| IPR000127      | 5.09  | 5.09  | 0    | 0    | 5 |
| IPR021219      | 1.08  | 0     | 1.05 | 1.25 | 5 |
| IPR000825      | 1.99  | 2.5   | 1.99 | 1.91 | 5 |
| TIGR01731      | 2.62  | 0     | 2.62 | 0    | 5 |
| IPR010814      | 1.1   | 0     | 1.1  | 0    | 5 |
| IPR007877      | 8.54  | 15    | 1    | 0    | 5 |
| IPR010839      | 1.5   | 1.88  | 1.42 | 0    | 5 |
| IPR015376      | 1.08  | 1.48  | 1.04 | 1    | 5 |
| IPR013549      | 1.11  | 1.07  | 1.11 | 0    | 5 |
| IPR002698      | 1.11  | 1.74  | 1.06 | 1.03 | 5 |
| IPR001405      | 1.48  | 1     | 1.49 | 1.14 | 5 |
| IPR010316      | 1.08  | 0     | 1.08 | 0    | 5 |
| IPR000418      | 12.94 | 13.3  | 1    | 0    | 5 |
| IPR003497      | 1.5   | 0     | 1.5  | 0    | 5 |
| IPR014887      | 3     | 3     | 0    | 0    | 5 |
| IPR014883      | 1.28  | 1.08  | 1.33 | 0    | 5 |
| IPR006169      | 1.09  | 1.92  | 1.02 | 0    | 5 |
| IPR002618      | 2.18  | 3.11  | 1.05 | 0    | 5 |
| IPR012990      | 4.86  | 4.86  | 0    | 0    | 5 |
| IPR021661      | 1.05  | 1.05  | 0    | 0    | 5 |
| IPR000944      | 2.46  | 1     | 2.48 | 1.11 | 5 |
| IPR002898      | 3.54  | 2.33  | 3.59 | 1.36 | 5 |
| PF08754        | 1.19  | 0     | 1.19 | 0    | 5 |
| IPR001523      | 7.42  | 8.83  | 1.25 | 0    | 5 |
| IPR012982      | 1.83  | 1.83  | 0    | 0    | 5 |
| IPR012989      | 1.99  | 1.99  | 0    | 0    | 5 |
| IPR019480      | 1.81  | 0     | 1.83 | 1.63 | 5 |

|           |       |       |       |      |   |
|-----------|-------|-------|-------|------|---|
| IPR019483 | 1.32  | 1.32  | 0     | 0    | 5 |
| IPR021978 | 6     | 6     | 0     | 0    | 5 |
| IPR006202 | 19.41 | 28.13 | 1     | 0    | 5 |
| IPR012463 | 5.86  | 5.86  | 0     | 0    | 5 |
| IPR001106 | 1.74  | 4.07  | 1.53  | 1    | 5 |
| PF12451   | 1.15  | 1.15  | 0     | 0    | 5 |
| IPR022052 | 3.03  | 3.03  | 0     | 0    | 5 |
| IPR002481 | 2.43  | 1     | 2.47  | 1    | 5 |
| IPR010560 | 2.5   | 2.5   | 0     | 0    | 5 |
| IPR007187 | 2.72  | 2.72  | 0     | 0    | 5 |
| IPR007185 | 3.35  | 3.41  | 0     | 1    | 5 |
| IPR013678 | 1.04  | 0     | 1.04  | 0    | 5 |
| PTHR23228 | 1.45  | 1.48  | 1     | 0    | 5 |
| IPR018449 | 1.4   | 0     | 1.41  | 1    | 5 |
| IPR002720 | 2.39  | 2.39  | 0     | 0    | 5 |
| IPR006914 | 2.33  | 0     | 2.33  | 0    | 5 |
| IPR020336 | 3.36  | 0     | 3.36  | 0    | 5 |
| IPR005571 | 1.5   | 1.5   | 0     | 0    | 5 |
| IPR007886 | 1.61  | 1.78  | 1.59  | 1    | 5 |
| IPR006211 | 4.34  | 4.34  | 0     | 0    | 5 |
| IPR002577 | 3.36  | 1.5   | 3.43  | 2.37 | 5 |
| IPR019050 | 1.98  | 1.98  | 0     | 0    | 5 |
| IPR015195 | 1.31  | 1.31  | 0     | 0    | 5 |
| IPR011478 | 5.14  | 0     | 5.14  | 0    | 5 |
| IPR004218 | 1.07  | 0     | 1.07  | 1    | 5 |
| IPR005161 | 2.12  | 2.12  | 0     | 0    | 5 |
| IPR018974 | 1.04  | 1.33  | 1.02  | 1    | 5 |
| IPR020602 | 1.74  | 1.55  | 1.77  | 1.29 | 5 |
| IPR019570 | 12.92 | 12.92 | 0     | 0    | 5 |
| IPR003811 | 1.19  | 1     | 1.19  | 0    | 5 |
| IPR014851 | 2.53  | 2.56  | 1     | 0    | 5 |
| PF11976   | 1.94  | 1.94  | 0     | 0    | 5 |
| PTHR22847 | 1.29  | 1.88  | 1     | 0    | 5 |
| IPR022153 | 1.01  | 0     | 1.01  | 0    | 5 |
| IPR007803 | 1.43  | 1.64  | 1.4   | 0    | 5 |
| IPR013536 | 2.02  | 2.02  | 0     | 0    | 5 |
| IPR013535 | 1.41  | 1.42  | 1     | 0    | 5 |
| IPR019293 | 1.75  | 0     | 1.11  | 1.88 | 5 |
| IPR020189 | 1.48  | 1.77  | 0     | 1    | 5 |
| PF07253   | 7     | 7     | 0     | 0    | 5 |
| IPR008538 | 12.02 | 0     | 12.02 | 0    | 5 |
| IPR002326 | 1.15  | 1.49  | 1.07  | 0    | 5 |
| IPR021846 | 1.13  | 1.13  | 0     | 0    | 5 |
| IPR018113 | 4.73  | 0     | 4.73  | 0    | 5 |
| IPR002146 | 1.38  | 2.7   | 1.37  | 1    | 5 |
| IPR002142 | 2.15  | 3.11  | 2.18  | 1.24 | 5 |
| IPR014767 | 2.59  | 2.59  | 0     | 0    | 5 |
| PF00504   | 11.98 | 37    | 5.54  | 0    | 5 |
| TIGR01045 | 6.33  | 0     | 6.33  | 0    | 5 |
| IPR000030 | 23.38 | 0     | 23.38 | 0    | 5 |
| IPR018838 | 1.47  | 1.47  | 0     | 0    | 5 |
| IPR015358 | 2.15  | 0     | 2.15  | 0    | 5 |
| IPR010457 | 5.3   | 5.3   | 0     | 0    | 5 |
| IPR003132 | 6.07  | 0     | 6.07  | 0    | 5 |
| IPR016034 | 4.24  | 4.24  | 0     | 0    | 5 |
| IPR013719 | 1.61  | 1.61  | 0     | 0    | 5 |
| IPR022365 | 3.65  | 3.65  | 0     | 0    | 5 |
| PF08703   | 1.94  | 1.94  | 0     | 0    | 5 |
| SM00837   | 32.33 | 32.33 | 0     | 0    | 5 |
| IPR013623 | 9.14  | 9.14  | 0     | 0    | 5 |
| PF12142   | 4.82  | 8     | 1     | 0    | 5 |
| IPR001342 | 1.33  | 1.65  | 1.33  | 1.02 | 5 |
| IPR018656 | 1.25  | 0     | 1.25  | 0    | 5 |
| IPR018389 | 3.66  | 1.67  | 3.7   | 1.33 | 5 |
| PTHR10199 | 1.57  | 1     | 1.8   | 1    | 5 |
| IPR002060 | 1.87  | 2.66  | 1.73  | 1.38 | 5 |
| IPR019247 | 1.01  | 0     | 1.01  | 0    | 5 |
| IPR005016 | 2.34  | 2.34  | 0     | 0    | 5 |
| IPR009578 | 2.67  | 1     | 3     | 0    | 5 |

|                |      |       |       |      |   |
|----------------|------|-------|-------|------|---|
| IPR002541      | 2.37 | 4.44  | 2.34  | 2.17 | 5 |
| IPR007743      | 7.92 | 10.22 | 1     | 0    | 5 |
| IPR000771      | 1.56 | 1.98  | 1.54  | 1    | 5 |
| IPR015162      | 1.07 | 1     | 1.07  | 0    | 5 |
| IPR022081      | 1.15 | 1.5   | 1.11  | 0    | 5 |
| IPR005651      | 1.09 | 1.33  | 1.05  | 1    | 5 |
| IPR018027      | 1.1  | 1.16  | 1.04  | 1.74 | 5 |
| IPR018020      | 1.19 | 1.23  | 1.19  | 0    | 5 |
| PTHR11945      | 2.5  | 2.5   | 0     | 0    | 5 |
| IPR011422      | 1.26 | 1.26  | 0     | 0    | 5 |
| IPR013860      | 3.39 | 3.39  | 0     | 0    | 5 |
| IPR013866      | 1.22 | 1.24  | 1     | 0    | 5 |
| IPR013131      | 2.11 | 1.38  | 2.16  | 0    | 5 |
| IPR004244      | 7.67 | 9     | 1     | 0    | 5 |
| IPR006622      | 2.09 | 2.5   | 1.74  | 1.33 | 5 |
| IPR007286      | 2.12 | 2.12  | 0     | 0    | 5 |
| IPR002777      | 3.18 | 4.44  | 1     | 1.04 | 5 |
| IPR018499      | 18.6 | 19.45 | 1     | 0    | 5 |
| IPR003827      | 1.26 | 1.3   | 0     | 1.19 | 5 |
| PF07019        | 1.19 | 1.19  | 0     | 1    | 5 |
| IPR020840      | 40.5 | 0     | 43.13 | 1    | 5 |
| IPR001425      | 1.89 | 1.86  | 1.38  | 3.17 | 5 |
| IPR005118      | 1.05 | 2     | 1.04  | 0    | 5 |
| IPR011106      | 2.61 | 2.61  | 0     | 0    | 5 |
| PTHR23225      | 2.71 | 2.71  | 0     | 0    | 5 |
| PTHR23083:SF14 | 1.13 | 1.5   | 1.1   | 0    | 5 |
| PTHR22939:SF10 | 1.32 | 1.67  | 1.08  | 0    | 5 |
| IPR008251      | 2    | 2     | 0     | 0    | 5 |
| IPR008257      | 1.51 | 2.59  | 1.36  | 1.06 | 5 |
| IPR015049      | 3.05 | 3.05  | 0     | 0    | 5 |
| IPR021817      | 1.02 | 1     | 1.02  | 0    | 5 |
| PF09237        | 1.32 | 1.32  | 0     | 0    | 5 |
| IPR013272      | 1.84 | 1.84  | 0     | 0    | 5 |
| IPR010895      | 2.34 | 5.35  | 1.59  | 1    | 5 |
| IPR018848      | 4.5  | 4.5   | 0     | 0    | 5 |
| IPR015366      | 3.34 | 4.35  | 2.59  | 3.67 | 5 |
| IPR002638      | 1.2  | 1.14  | 1.17  | 1.67 | 5 |
| TIGR03505      | 1.16 | 0     | 1.16  | 0    | 5 |
| IPR010911      | 1.3  | 1.33  | 1     | 0    | 5 |
| IPR021520      | 1.12 | 1.17  | 1     | 0    | 5 |
| IPR005190      | 2.08 | 1     | 2.09  | 0    | 5 |
| PF12303        | 1.36 | 1     | 1.36  | 0    | 5 |
| IPR010582      | 1.75 | 3.11  | 1.53  | 1    | 4 |
| IPR020582      | 1.05 | 2.5   | 1.04  | 0    | 4 |
| IPR021726      | 1.11 | 1.11  | 0     | 0    | 4 |
| IPR006693      | 6.59 | 7.15  | 1.29  | 0    | 4 |
| IPR006528      | 1.4  | 1     | 1.4   | 0    | 4 |
| IPR004788      | 1.12 | 1.57  | 1.07  | 1    | 4 |
| IPR009408      | 4.33 | 4.33  | 0     | 0    | 4 |
| IPR011022      | 8.46 | 8.46  | 0     | 0    | 4 |
| IPR010775      | 1.05 | 1.35  | 1.01  | 0    | 4 |
| IPR003692      | 1.59 | 1.8   | 1.55  | 1.36 | 4 |
| IPR009967      | 1.37 | 1     | 1.38  | 0    | 4 |
| IPR005548      | 1.01 | 0     | 1.01  | 0    | 4 |
| IPR002010      | 1.41 | 1     | 1.42  | 0    | 4 |
| IPR002019      | 1.22 | 1.12  | 1.23  | 1    | 4 |
| IPR000506      | 1.09 | 1.45  | 1.06  | 1.21 | 4 |
| PTHR18895      | 1.18 | 1.33  | 1.11  | 1    | 4 |
| IPR005061      | 2.44 | 2.44  | 0     | 0    | 4 |
| IPR011615      | 3.26 | 3.26  | 0     | 0    | 4 |
| IPR006794      | 4.17 | 4.17  | 0     | 0    | 4 |
| IPR006797      | 2.56 | 2.56  | 0     | 0    | 4 |
| IPR000299      | 1.9  | 2.29  | 1     | 0    | 4 |
| IPR015868      | 1.36 | 2     | 1.3   | 0    | 4 |
| IPR015864      | 1.04 | 1.6   | 1.03  | 0    | 4 |
| IPR021034      | 2.17 | 0     | 2.17  | 0    | 4 |
| PF12439        | 1.09 | 0     | 1.09  | 1.09 | 4 |
| IPR008322      | 1.18 | 1.45  | 1.1   | 1    | 4 |
| IPR022078      | 2.83 | 4.5   | 1.17  | 0    | 4 |

|           |      |      |      |      |   |
|-----------|------|------|------|------|---|
| IPR010508 | 1.67 | 1.67 | 0    | 0    | 4 |
| IPR018913 | 1.86 | 0    | 1.86 | 0    | 4 |
| PTHR21385 | 1.29 | 1.29 | 0    | 0    | 4 |
| IPR006616 | 17.5 | 17.5 | 0    | 0    | 4 |
| IPR006619 | 4.73 | 9.45 | 1.14 | 0    | 4 |
| PF08169   | 1.39 | 1.39 | 0    | 0    | 4 |
| IPR007255 | 1.32 | 1.32 | 0    | 0    | 4 |
| IPR013650 | 1.43 | 2.69 | 1.26 | 1.56 | 4 |
| IPR008428 | 4.31 | 4.31 | 0    | 0    | 4 |
| IPR008282 | 1.04 | 2.45 | 1.02 | 0    | 4 |
| PF10131   | 1.14 | 0    | 1.14 | 0    | 4 |
| PF08190   | 3.18 | 3.18 | 0    | 0    | 4 |
| IPR015412 | 1.7  | 1.71 | 1    | 0    | 4 |
| IPR021998 | 8.89 | 8.89 | 0    | 0    | 4 |
| IPR021993 | 1    | 0    | 1    | 0    | 4 |
| PTHR10742 | 1.08 | 1.3  | 1    | 1    | 4 |
| IPR007861 | 1    | 1    | 1    | 0    | 4 |
| IPR000581 | 1.95 | 2.07 | 2    | 1.05 | 4 |
| IPR010820 | 3.7  | 3.7  | 0    | 0    | 4 |
| PF12010   | 2.25 | 1    | 2.29 | 0    | 4 |
| IPR011697 | 1.51 | 2.93 | 1.39 | 1.2  | 4 |
| IPR002715 | 2.61 | 3.51 | 0    | 1    | 4 |
| IPR019039 | 1.12 | 1    | 1.07 | 2    | 4 |
| IPR015205 | 1.83 | 1.83 | 0    | 0    | 4 |
| IPR010327 | 2.67 | 0    | 2.72 | 2    | 4 |
| IPR010325 | 6.5  | 8.71 | 1.33 | 0    | 4 |
| IPR002821 | 1.84 | 2.12 | 1.77 | 1.91 | 4 |
| IPR005148 | 1.07 | 1.3  | 1.06 | 1    | 4 |
| IPR005149 | 3.35 | 0    | 3.33 | 3.61 | 4 |
| IPR008040 | 1.86 | 2.09 | 1.77 | 2.13 | 4 |
| IPR018999 | 1.14 | 1.14 | 0    | 0    | 4 |
| IPR009316 | 1.23 | 1.23 | 0    | 0    | 4 |
| PTHR21307 | 1.75 | 1.75 | 0    | 0    | 4 |
| IPR008209 | 1.33 | 2.87 | 1.06 | 1    | 4 |
| IPR019595 | 1.1  | 1.23 | 1.07 | 0    | 4 |
| IPR003870 | 9.38 | 0    | 9.38 | 0    | 4 |
| IPR006314 | 1.51 | 1.93 | 1.49 | 1    | 4 |
| IPR012914 | 2.24 | 0    | 2.24 | 0    | 4 |
| IPR022138 | 1.11 | 0    | 1.11 | 1.5  | 4 |
| PF09031   | 1.13 | 1.13 | 0    | 0    | 4 |
| IPR003508 | 4.4  | 4.4  | 0    | 0    | 4 |
| IPR007354 | 1.06 | 0    | 1.02 | 1.2  | 4 |
| IPR010433 | 4.4  | 4.4  | 0    | 0    | 4 |
| IPR014973 | 1.13 | 0    | 1.13 | 0    | 4 |
| IPR009093 | 1    | 0    | 1    | 0    | 4 |
| IPR015898 | 4.53 | 4.53 | 0    | 0    | 4 |
| IPR015894 | 4.31 | 4.31 | 0    | 0    | 4 |
| PTHR19955 | 1.27 | 1.27 | 0    | 0    | 4 |
| IPR013727 | 2.25 | 1    | 2.26 | 0    | 4 |
| IPR008512 | 5.71 | 5.71 | 0    | 0    | 4 |
| IPR013721 | 1.75 | 1.75 | 0    | 0    | 4 |
| IPR007941 | 1.75 | 1.9  | 1    | 1    | 4 |
| IPR001533 | 1.25 | 1.56 | 1.21 | 1.05 | 4 |
| IPR012993 | 1.04 | 1.04 | 0    | 0    | 4 |
| PF09607   | 1.45 | 1.47 | 1    | 0    | 4 |
| PF06807   | 2.03 | 2.03 | 0    | 0    | 4 |
| IPR019305 | 1.01 | 0    | 1.01 | 0    | 4 |
| IPR019301 | 1.14 | 1    | 1.14 | 0    | 4 |
| IPR010664 | 1.08 | 1    | 1.08 | 0    | 4 |
| IPR013228 | 7.76 | 0    | 7.76 | 0    | 4 |
| IPR013595 | 1.91 | 2.53 | 1.83 | 0    | 4 |
| IPR019492 | 1.13 | 0    | 1.13 | 0    | 4 |
| IPR021943 | 1.12 | 0    | 1.12 | 1    | 4 |
| IPR009292 | 1.09 | 1.09 | 1    | 0    | 4 |
| IPR006218 | 2.23 | 2.32 | 2.25 | 1    | 4 |
| IPR004304 | 2.06 | 2.1  | 2.12 | 1.21 | 4 |
| PTHR23320 | 1    | 1    | 1    | 0    | 4 |
| TIGR02604 | 4    | 0    | 4    | 0    | 4 |
| IPR007010 | 2.32 | 2.32 | 0    | 0    | 4 |

|               |       |       |       |      |   |
|---------------|-------|-------|-------|------|---|
| IPR005343     | 1.38  | 1.38  | 0     | 0    | 4 |
| IPR005349     | 2.03  | 2.24  | 1     | 0    | 4 |
| IPR004898     | 1.88  | 2.56  | 1.61  | 0    | 4 |
| IPR011483     | 1.54  | 1.86  | 1.41  | 0    | 4 |
| IPR010578     | 2     | 2     | 0     | 0    | 4 |
| PTHR11697     | 3.33  | 3.33  | 0     | 0    | 4 |
| IPR022226     | 1.2   | 1.2   | 0     | 0    | 4 |
| IPR006577     | 2.34  | 2.34  | 0     | 0    | 4 |
| PF04330       | 1.33  | 0     | 1.33  | 0    | 4 |
| IPR013608     | 3.2   | 3.2   | 0     | 0    | 4 |
| IPR019385     | 1.21  | 1.21  | 1     | 0    | 4 |
| PTHR10992     | 1.51  | 1.97  | 1.45  | 1.2  | 4 |
| IPR005484     | 1.13  | 2.37  | 1.01  | 1    | 4 |
| IPR006907     | 21    | 21    | 0     | 0    | 4 |
| IPR010721     | 1.35  | 1.86  | 1.13  | 1    | 4 |
| PTHR23416:SF2 | 1.18  | 1.43  | 1.17  | 1    | 4 |
| PF09162       | 2.1   | 2.1   | 0     | 0    | 4 |
| IPR003603     | 2.05  | 2.05  | 0     | 0    | 4 |
| IPR019888     | 5.3   | 2.33  | 5.49  | 3.61 | 4 |
| IPR005038     | 10.67 | 0     | 10.67 | 0    | 4 |
| IPR013611     | 4.62  | 2     | 4.74  | 2.45 | 4 |
| IPR011649     | 2.11  | 0     | 2.12  | 2    | 4 |
| IPR007722     | 1.25  | 1.25  | 0     | 0    | 4 |
| IPR021046     | 1     | 0     | 1     | 0    | 4 |
| IPR019065     | 1.09  | 0     | 1.1   | 1    | 4 |
| IPR015187     | 1.42  | 1.42  | 0     | 0    | 4 |
| IPR015188     | 1.67  | 1.67  | 0     | 0    | 4 |
| IPR002637     | 1.09  | 1.36  | 1.07  | 1    | 4 |
| IPR017795     | 2.74  | 3.22  | 1     | 0    | 4 |
| IPR018940     | 1.81  | 1.81  | 0     | 0    | 4 |
| IPR005178     | 2.87  | 2.87  | 0     | 0    | 4 |
| IPR013689     | 1.04  | 1     | 1.04  | 0    | 4 |
| IPR013686     | 2.06  | 0     | 2.06  | 0    | 4 |
| PF12254       | 1.09  | 1.09  | 0     | 0    | 4 |
| IPR002751     | 1.33  | 0     | 1.26  | 1.81 | 4 |
| IPR006989     | 1.83  | 1.83  | 0     | 0    | 4 |
| IPR006982     | 1.12  | 1.43  | 1.09  | 1    | 4 |
| IPR003808     | 1.27  | 2.73  | 1.23  | 0    | 4 |
| IPR012943     | 2.05  | 2.05  | 0     | 0    | 4 |
| PF11900       | 8.14  | 8.14  | 0     | 0    | 4 |
| IPR021418     | 1.24  | 1.24  | 0     | 0    | 4 |
| IPR022141     | 2.67  | 2.67  | 0     | 0    | 4 |
| PTHR22870     | 1.26  | 1.38  | 1.19  | 0    | 4 |
| IPR015280     | 1.14  | 1.14  | 0     | 0    | 4 |
| IPR001931     | 1.46  | 1.46  | 0     | 0    | 4 |
| IPR003680     | 2.87  | 5.07  | 2.81  | 1.17 | 4 |
| IPR007302     | 1.56  | 1     | 1.56  | 1    | 4 |
| IPR013528     | 1.25  | 1.68  | 1.06  | 1    | 4 |
| IPR018535     | 2.7   | 4.18  | 1.23  | 0    | 4 |
| IPR002655     | 2.7   | 3.9   | 1.07  | 0    | 4 |
| IPR002657     | 1.96  | 3.05  | 1.85  | 1.29 | 4 |
| IPR002659     | 11.4  | 11.63 | 1     | 0    | 4 |
| IPR021629     | 1.36  | 1.36  | 0     | 0    | 4 |
| IPR015274     | 1.88  | 1.88  | 0     | 0    | 4 |
| PF10577       | 2.33  | 2.57  | 1.5   | 0    | 4 |
| IPR009695     | 1.45  | 3.86  | 1.3   | 0    | 4 |
| IPR009698     | 1.12  | 1     | 1.12  | 0    | 4 |
| IPR010656     | 3.43  | 1.5   | 3.53  | 1.38 | 4 |
| IPR010596     | 8.71  | 8.71  | 0     | 0    | 4 |
| IPR021122     | 1.15  | 2     | 1.06  | 0    | 4 |
| IPR011722     | 1.14  | 1.51  | 1.04  | 0    | 4 |
| IPR002133     | 3.51  | 6.12  | 3.24  | 3    | 4 |
| IPR014772     | 1.25  | 1.25  | 0     | 0    | 4 |
| IPR006127     | 1.77  | 0     | 1.78  | 1.32 | 4 |
| IPR007655     | 1.69  | 0     | 1.69  | 0    | 4 |
| IPR018821     | 1.43  | 0     | 1.43  | 1    | 4 |
| IPR018823     | 2.32  | 2.32  | 0     | 0    | 4 |
| IPR005522     | 3.22  | 3.25  | 1     | 0    | 4 |
| IPR010445     | 1.11  | 1     | 1.11  | 0    | 4 |

|           |       |       |       |      |   |
|-----------|-------|-------|-------|------|---|
| IPR014929 | 1.2   | 1.2   | 0     | 0    | 4 |
| IPR014927 | 1     | 0     | 1     | 1    | 4 |
| IPR014920 | 5.33  | 5.33  | 0     | 0    | 4 |
| PTHR11271 | 1.06  | 1     | 1.07  | 1    | 4 |
| PTHR22938 | 1.87  | 1.87  | 0     | 0    | 4 |
| IPR010935 | 1.21  | 1.31  | 1     | 0    | 4 |
| IPR000900 | 42.46 | 42.46 | 0     | 0    | 4 |
| IPR021094 | 7.17  | 7.17  | 0     | 0    | 4 |
| IPR012796 | 1     | 1     | 1     | 0    | 4 |
| IPR022011 | 2     | 2     | 0     | 0    | 4 |
| IPR021883 | 1.22  | 2     | 1     | 0    | 4 |
| IPR008854 | 1.26  | 1.9   | 1.09  | 0    | 4 |
| IPR010011 | 6.67  | 6.67  | 0     | 0    | 4 |
| IPR004149 | 1     | 0     | 1     | 1    | 4 |
| IPR012327 | 1.76  | 1     | 1.77  | 1.5  | 4 |
| IPR020953 | 2.31  | 1     | 2.31  | 0    | 4 |
| IPR001352 | 1.19  | 1.43  | 1.17  | 1.09 | 4 |
| IPR021931 | 7.75  | 7.75  | 0     | 0    | 4 |
| PTHR10183 | 1.67  | 1.67  | 0     | 0    | 4 |
| IPR000566 | 11.68 | 11.68 | 0     | 0    | 4 |
| PF06425   | 1.15  | 1.15  | 0     | 0    | 4 |
| IPR001147 | 1.31  | 1.49  | 0     | 1    | 4 |
| IPR015155 | 1.19  | 1.2   | 0     | 1    | 4 |
| IPR022094 | 1.34  | 0     | 1.34  | 0    | 4 |
| IPR022099 | 1.88  | 1.88  | 0     | 0    | 4 |
| IPR010526 | 3.48  | 3.48  | 0     | 0    | 4 |
| IPR011439 | 19.26 | 0     | 19.26 | 0    | 4 |
| IPR004256 | 1.48  | 0     | 1.33  | 1.82 | 4 |
| IPR018934 | 1.38  | 1.42  | 1.03  | 2.14 | 4 |
| PF11870   | 1.12  | 0     | 1.12  | 0    | 4 |
| IPR022252 | 2.69  | 2.69  | 0     | 0    | 4 |
| IPR012500 | 1.89  | 0     | 1.89  | 0    | 4 |
| IPR012501 | 1.19  | 1.19  | 0     | 0    | 4 |
| IPR019533 | 1.45  | 2.6   | 1.41  | 0    | 4 |
| IPR019537 | 1.25  | 1.25  | 0     | 0    | 4 |
| IPR002187 | 2.03  | 1.5   | 1.99  | 2.8  | 4 |
| IPR012978 | 1.22  | 1.22  | 0     | 0    | 4 |
| IPR012972 | 2.1   | 2.1   | 0     | 0    | 4 |
| IPR012975 | 2.79  | 2.79  | 0     | 0    | 4 |
| PF11933   | 2.57  | 2.57  | 0     | 0    | 4 |
| IPR006460 | 14.83 | 14.83 | 0     | 0    | 4 |
| IPR007599 | 2.44  | 2.46  | 1     | 0    | 4 |
| IPR007590 | 2.16  | 2.16  | 0     | 0    | 4 |
| IPR010802 | 3.42  | 0     | 3.42  | 0    | 4 |
| IPR004687 | 2.27  | 2.27  | 0     | 0    | 4 |
| PF12072   | 1.02  | 1     | 1.02  | 0    | 4 |
| IPR006852 | 5     | 11.14 | 1     | 1.5  | 4 |
| IPR019015 | 1.16  | 1.16  | 0     | 0    | 4 |
| IPR019018 | 2.92  | 3     | 1     | 0    | 4 |
| IPR015220 | 1.17  | 0     | 1.19  | 1    | 4 |
| IPR015223 | 1.12  | 1.36  | 1.02  | 1    | 4 |
| IPR005124 | 1.69  | 1.77  | 1     | 1    | 4 |
| IPR005129 | 1.3   | 1.69  | 1.29  | 1    | 4 |
| IPR000648 | 6.05  | 6.05  | 0     | 0    | 4 |
| IPR007148 | 2.25  | 2.25  | 0     | 0    | 4 |
| IPR008881 | 1.04  | 2.56  | 1.02  | 0    | 4 |
| IPR008884 | 1.22  | 1     | 1.24  | 1    | 4 |
| IPR014893 | 1.28  | 1.28  | 0     | 0    | 4 |
| IPR018873 | 1.57  | 0     | 1.57  | 0    | 4 |
| IPR009580 | 1.21  | 1.21  | 0     | 1    | 4 |
| IPR019479 | 1.74  | 3.95  | 1.44  | 1.14 | 4 |
| IPR010419 | 1.56  | 0     | 1.5   | 2.21 | 4 |
| IPR003954 | 1.45  | 1.45  | 0     | 0    | 4 |
| TIGR02486 | 9.17  | 0     | 9.17  | 0    | 4 |
| IPR005822 | 1.17  | 2.69  | 1.02  | 1    | 4 |
| IPR017916 | 1.16  | 1.16  | 0     | 0    | 4 |
| IPR000228 | 1.4   | 1.9   | 1.07  | 1    | 4 |
| IPR021536 | 1.5   | 1.5   | 0     | 0    | 4 |
| IPR004834 | 2.8   | 3.07  | 1.2   | 0    | 4 |



|                |       |       |      |      |   |
|----------------|-------|-------|------|------|---|
| PF12333        | 1.1   | 1.1   | 0    | 0    | 4 |
| IPR014038      | 1.7   | 2.15  | 0    | 1    | 4 |
| IPR014039      | 1.06  | 1.81  | 1.02 | 0    | 4 |
| IPR010599      | 2.8   | 2.8   | 0    | 0    | 4 |
| IPR001515      | 1.33  | 1.52  | 0    | 1    | 4 |
| PTHR18901      | 1.41  | 1.65  | 1    | 1    | 4 |
| PTHR11102:SF11 | 1.07  | 1.33  | 1    | 0    | 4 |
| IPR019367      | 1.11  | 1.11  | 0    | 0    | 4 |
| IPR019369      | 1.48  | 1.49  | 1    | 0    | 4 |
| IPR000072      | 3.8   | 3.8   | 0    | 0    | 4 |
| IPR012562      | 2.83  | 3.06  | 1    | 0    | 4 |
| IPR021963      | 2.38  | 2.38  | 0    | 0    | 4 |
| IPR021966      | 1.12  | 1.12  | 0    | 0    | 4 |
| PTHR10668      | 1.04  | 1     | 1.06 | 1    | 4 |
| IPR005559      | 4.88  | 4.88  | 0    | 0    | 4 |
| IPR002026      | 1.22  | 1.18  | 1.23 | 1    | 4 |
| IPR007541      | 1.9   | 2.14  | 1.2  | 0    | 4 |
| IPR007545      | 1.02  | 1.2   | 1    | 1    | 4 |
| IPR007205      | 1.14  | 1.14  | 0    | 0    | 4 |
| PF07584        | 1.12  | 0     | 1.11 | 1.29 | 4 |
| IPR004326      | 13.64 | 16.44 | 1    | 0    | 4 |
| PTHR23303      | 1.16  | 1.25  | 1    | 1    | 4 |
| IPR003203      | 1.08  | 1     | 1.08 | 1    | 4 |
| IPR015871      | 1.26  | 1.26  | 0    | 0    | 4 |
| IPR015872      | 1.3   | 1.3   | 0    | 0    | 4 |
| IPR021029      | 1     | 0     | 1    | 0    | 4 |
| IPR012474      | 19.17 | 19.17 | 0    | 0    | 4 |
| IPR015127      | 1.2   | 1.2   | 0    | 0    | 4 |
| PTHR11908      | 1.14  | 1.33  | 1    | 0    | 4 |
| IPR007781      | 1.47  | 1.46  | 1.5  | 0    | 4 |
| IPR022209      | 1.11  | 1.11  | 0    | 0    | 4 |
| IPR007243      | 1.46  | 1.46  | 0    | 0    | 4 |
| IPR007248      | 6.11  | 6.26  | 1    | 0    | 4 |
| IPR013663      | 1.18  | 0     | 1.18 | 0    | 4 |
| IPR021277      | 1.04  | 0     | 1.04 | 0    | 4 |
| IPR012532      | 2     | 2     | 0    | 0    | 4 |
| PF12188        | 3     | 3     | 0    | 0    | 4 |
| IPR002737      | 1.17  | 1.26  | 1.16 | 1.02 | 4 |
| IPR002735      | 1.91  | 2.31  | 0    | 1.2  | 4 |
| IPR017732      | 1.91  | 0     | 1.91 | 0    | 4 |
| IPR018612      | 1.15  | 1.15  | 0    | 0    | 4 |
| IPR015391      | 1.41  | 1     | 1.41 | 0    | 4 |
| IPR015399      | 1.68  | 1.68  | 0    | 0    | 4 |
| PTHR11539      | 1.38  | 1.38  | 0    | 0    | 4 |
| IPR007899      | 1.14  | 1     | 1.15 | 1    | 4 |
| IPR003590      | 3.78  | 3.78  | 0    | 0    | 4 |
| PF06013        | 3.65  | 1     | 3.7  | 0    | 4 |
| PTHR23125:SF33 | 1.22  | 1.45  | 1    | 0    | 4 |
| IPR011665      | 1.25  | 1.25  | 0    | 0    | 4 |
| IPR015370      | 10.33 | 10.33 | 0    | 0    | 4 |
| IPR007705      | 3.83  | 3.83  | 0    | 0    | 4 |
| IPR019049      | 1.34  | 1.34  | 0    | 0    | 4 |
| IPR015212      | 1.59  | 1.59  | 0    | 0    | 4 |
| IPR011467      | 2.63  | 0     | 2.63 | 0    | 4 |
| IPR013823      | 1.11  | 1.57  | 1.07 | 0    | 4 |
| IPR002836      | 1.1   | 1.15  | 0    | 1.02 | 4 |
| IPR004201      | 2.2   | 2.47  | 1.07 | 2.13 | 4 |
| IPR003577      | 7.56  | 7.56  | 0    | 0    | 4 |
| IPR006660      | 2.12  | 1.5   | 2.12 | 1    | 4 |
| IPR007130      | 2.61  | 2.99  | 1.26 | 0    | 4 |
| IPR020630      | 1.23  | 2.64  | 1.11 | 1    | 4 |
| IPR020636      | 1.14  | 1.22  | 1    | 0    | 4 |
| IPR000671      | 1.73  | 0     | 1.7  | 1.9  | 4 |
| PTHR16056      | 2.46  | 3.47  | 1.09 | 0    | 4 |
| IPR021141      | 3.86  | 5.73  | 1.3  | 0    | 4 |
| IPR019589      | 1.12  | 1.12  | 0    | 0    | 4 |
| PTHR19328:SF2  | 1     | 0     | 1    | 0    | 4 |
| IPR006148      | 1.51  | 1.61  | 1.49 | 0    | 4 |
| PF09273        | 2.56  | 2.56  | 0    | 0    | 4 |

|                 |       |       |      |      |   |
|-----------------|-------|-------|------|------|---|
| IPR003675       | 3.05  | 2.09  | 3.19 | 2.73 | 4 |
| IPR007815       | 1.29  | 1     | 1.34 | 1    | 4 |
| IPR007812       | 1.13  | 1     | 1.13 | 0    | 4 |
| IPR015340       | 2.68  | 2.68  | 0    | 0    | 4 |
| IPR001003       | 16.93 | 16.93 | 0    | 0    | 4 |
| IPR002676       | 1.02  | 1.11  | 1.02 | 0    | 4 |
| IPR002585       | 1.59  | 1     | 1.6  | 1.58 | 4 |
| IPR006806       | 1.11  | 1.11  | 0    | 0    | 4 |
| IPR010425       | 1.38  | 0     | 1.38 | 0    | 4 |
| IPR014940       | 1.82  | 5.08  | 1.12 | 1    | 4 |
| IPR013990       | 1.76  | 6.71  | 1.29 | 1    | 4 |
| IPR018717       | 1.02  | 1     | 1.02 | 0    | 4 |
| IPR000967       | 3.72  | 3.72  | 0    | 0    | 4 |
| IPR013939       | 1.07  | 1.07  | 0    | 0    | 4 |
| IPR003702       | 1.46  | 1.12  | 1.52 | 1.2  | 4 |
| IPR016033       | 1     | 0     | 0    | 1    | 4 |
| IPR013710       | 1.01  | 0     | 1.01 | 0    | 4 |
| IPR004282       | 1.83  | 3.4   | 1.23 | 0    | 4 |
| IPR004866       | 1.12  | 3     | 1.09 | 0    | 4 |
| IPR002421       | 1.24  | 1.57  | 1.24 | 0    | 4 |
| PTHR10887:SF27  | 3.64  | 3.64  | 0    | 0    | 4 |
| IPR001543       | 2.72  | 1.5   | 2.73 | 0    | 4 |
| PTHR10499:SF114 | 1.1   | 1.14  | 1.08 | 0    | 4 |
| IPR015088       | 1.1   | 1.11  | 1    | 0    | 4 |
| IPR002157       | 1.52  | 1.52  | 0    | 0    | 4 |
| IPR002154       | 7     | 7     | 0    | 0    | 4 |
| IPR004127       | 2.52  | 3.43  | 1    | 1.04 | 4 |
| PTHR22767       | 1.12  | 1.12  | 0    | 0    | 4 |
| IPR013236       | 2.32  | 0     | 2.32 | 0    | 4 |
| IPR021829       | 1.03  | 1.07  | 1    | 0    | 4 |
| IPR013583       | 5.19  | 5.19  | 0    | 0    | 4 |
| IPR013584       | 3.97  | 4.22  | 2    | 0    | 4 |
| IPR019599       | 2.25  | 0     | 2.25 | 0    | 4 |
| IPR021825       | 9.33  | 9.33  | 0    | 0    | 4 |
| IPR015324       | 1.07  | 1.1   | 1.04 | 1    | 4 |
| IPR009286       | 1.28  | 1.28  | 0    | 0    | 4 |
| PTHR10527:SF3   | 1     | 1     | 0    | 0    | 4 |
| IPR004370       | 1.81  | 1.4   | 1.83 | 1.33 | 4 |
| IPR003788       | 1.17  | 1.79  | 1.04 | 0    | 4 |
| IPR003780       | 1.09  | 1.11  | 1.07 | 2    | 4 |
| IPR003787       | 2.27  | 1     | 2.21 | 3    | 4 |
| IPR000783       | 1.32  | 1.52  | 0    | 1    | 4 |
| IPR009675       | 7.65  | 7.65  | 0    | 0    | 4 |
| IPR022033       | 1.28  | 1.28  | 0    | 0    | 4 |
| IPR022030       | 1.22  | 1.22  | 0    | 0    | 4 |
| IPR011494       | 1.22  | 1.22  | 0    | 0    | 4 |
| IPR012859       | 5.89  | 0     | 0    | 5.89 | 4 |
| IPR020547       | 1.06  | 1.47  | 1.04 | 0    | 4 |
| IPR021766       | 1.01  | 0     | 1.01 | 0    | 4 |
| IPR006568       | 1.57  | 1.57  | 0    | 0    | 4 |
| IPR006563       | 16.43 | 16.43 | 0    | 0    | 4 |
| IPR006565       | 2.62  | 2.62  | 0    | 0    | 4 |
| PTHR15859       | 1.42  | 1.42  | 0    | 0    | 4 |
| IPR018465       | 1.09  | 1.09  | 0    | 0    | 4 |
| IPR018467       | 15.57 | 15.57 | 0    | 0    | 4 |
| IPR018461       | 2.55  | 0     | 2.58 | 1.83 | 4 |
| PF11767         | 1     | 1     | 0    | 0    | 4 |
| PF11764         | 1.1   | 1.1   | 0    | 0    | 4 |
| PF12157         | 1.35  | 1.35  | 0    | 0    | 4 |
| PF04801         | 1.27  | 1.27  | 0    | 0    | 4 |
| IPR020972       | 1.4   | 0     | 1.4  | 0    | 4 |
| IPR001372       | 4     | 4     | 0    | 0    | 4 |
| PTHR10615       | 1     | 1     | 0    | 0    | 4 |
| IPR009612       | 1.84  | 0     | 1.84 | 0    | 4 |
| IPR011650       | 1.16  | 1.08  | 1.18 | 1    | 4 |
| IPR020839       | 1.63  | 1.63  | 0    | 0    | 4 |
| IPR006747       | 1.66  | 7.25  | 1.1  | 0    | 4 |
| IPR013818       | 19.72 | 20.97 | 1    | 0    | 4 |
| IPR018955       | 2.68  | 2.68  | 0    | 0    | 4 |

|           |       |       |      |      |   |
|-----------|-------|-------|------|------|---|
| IPR018954 | 2.61  | 3     | 1.33 | 1    | 4 |
| IPR018959 | 1.95  | 1.29  | 2.07 | 0    | 4 |
| TIGR02777 | 1.08  | 0     | 1.09 | 1    | 4 |
| IPR003351 | 2.33  | 2.33  | 0    | 0    | 4 |
| IPR015392 | 1.2   | 1     | 1.2  | 0    | 4 |
| IPR013697 | 1.21  | 1.21  | 0    | 0    | 4 |
| IPR000119 | 2.85  | 1.5   | 2.86 | 2    | 4 |
| IPR015030 | 3.4   | 3.4   | 0    | 0    | 4 |
| IPR015033 | 1.67  | 1.67  | 0    | 0    | 4 |
| IPR015032 | 1.44  | 0     | 1.45 | 1.25 | 4 |
| IPR002748 | 1.01  | 0     | 1.01 | 1    | 4 |
| IPR003830 | 1.24  | 1.21  | 1.32 | 1    | 4 |
| IPR012952 | 1.17  | 1.17  | 1    | 0    | 4 |
| IPR013513 | 4.39  | 4.39  | 0    | 0    | 4 |
| IPR022170 | 1.54  | 2.11  | 1.04 | 1    | 4 |
| IPR022175 | 2.08  | 2.08  | 0    | 0    | 4 |
| IPR007319 | 1.13  | 1.13  | 0    | 0    | 4 |
| IPR003676 | 76.14 | 76.14 | 0    | 0    | 4 |
| IPR013556 | 1.14  | 1     | 1.14 | 0    | 4 |
| PTHR12277 | 1.29  | 1.79  | 1.12 | 0    | 4 |
| PF09718   | 1.88  | 0     | 1.88 | 0    | 4 |
| IPR007553 | 1.42  | 2     | 1.43 | 1.27 | 4 |
| IPR021619 | 3     | 3     | 0    | 0    | 4 |
| IPR005849 | 1.16  | 1.29  | 1.14 | 1    | 4 |
| IPR010363 | 1     | 1     | 0    | 0    | 4 |
| IPR006767 | 1.93  | 1.93  | 0    | 0    | 4 |
| IPR013187 | 30.43 | 30.43 | 0    | 0    | 4 |
| IPR013185 | 1.2   | 2.2   | 1.19 | 1    | 4 |
| IPR001772 | 2.48  | 2.48  | 0    | 0    | 4 |
| PF10560   | 1.12  | 1.12  | 0    | 0    | 4 |
| IPR004855 | 1.52  | 1.52  | 0    | 0    | 4 |
| IPR004903 | 7.33  | 0     | 7.33 | 0    | 4 |
| IPR014543 | 1.18  | 0     | 1.18 | 0    | 4 |
| IPR010643 | 1.16  | 1.16  | 0    | 0    | 4 |
| IPR007168 | 1.58  | 0     | 1.6  | 1.17 | 4 |
| IPR018287 | 1.24  | 1.24  | 0    | 0    | 4 |
| IPR007400 | 1.25  | 1.92  | 1.2  | 0    | 4 |
| IPR004463 | 1.08  | 1.88  | 1.07 | 0    | 4 |
| IPR019189 | 1.19  | 1.19  | 0    | 0    | 4 |
| IPR008162 | 1.31  | 2.27  | 1.19 | 1.07 | 4 |
| IPR004664 | 1.6   | 1     | 1.61 | 1.33 | 4 |
| IPR015375 | 1.09  | 1.49  | 1.03 | 1    | 4 |
| IPR002624 | 1.79  | 3.12  | 1.47 | 0    | 4 |
| IPR014939 | 1.76  | 1.76  | 0    | 0    | 4 |
| IPR014935 | 5.33  | 5.33  | 0    | 0    | 4 |
| PF02002   | 1.44  | 1.56  | 1.25 | 1.33 | 4 |
| IPR010905 | 2.29  | 3.11  | 2.2  | 1.25 | 4 |
| IPR007051 | 2.47  | 2.47  | 0    | 0    | 4 |
| IPR013768 | 6.38  | 6.38  | 0    | 0    | 4 |
| IPR011263 | 1.14  | 2.49  | 1.02 | 1    | 4 |
| PF12316   | 6.6   | 6.6   | 0    | 0    | 4 |
| PTHR14025 | 1.12  | 1.33  | 1    | 0    | 4 |
| IPR021718 | 1.28  | 1.28  | 0    | 0    | 4 |
| IPR008823 | 1.03  | 1     | 1.03 | 1    | 4 |
| IPR008762 | 1.38  | 0     | 1.38 | 0    | 4 |
| IPR006538 | 1.24  | 1     | 1.24 | 0    | 4 |
| IPR003474 | 2.16  | 1     | 2.17 | 2    | 4 |
| PF06268   | 4.72  | 5.53  | 1    | 0    | 4 |
| IPR006941 | 3.92  | 3.92  | 0    | 0    | 4 |
| IPR006944 | 1.63  | 1     | 1.64 | 1    | 4 |
| IPR020945 | 1.99  | 0     | 2.01 | 1.67 | 4 |
| PF09402   | 1.52  | 1.52  | 0    | 0    | 4 |
| IPR001328 | 1.08  | 2.02  | 1.03 | 0    | 4 |
| IPR000517 | 1.2   | 2.8   | 1.02 | 1    | 4 |
| PF02379   | 2.16  | 0     | 2.16 | 0    | 4 |
| IPR013725 | 1.15  | 1.16  | 0    | 1    | 4 |
| PF12399   | 3.52  | 2     | 3.57 | 2.2  | 4 |
| IPR022062 | 1.31  | 1     | 1.32 | 0    | 4 |
| IPR003142 | 1.05  | 1.29  | 1.03 | 1.12 | 4 |

|                |       |       |      |      |   |
|----------------|-------|-------|------|------|---|
| PF11860        | 1.03  | 0     | 1.03 | 0    | 4 |
| IPR007396      | 1.16  | 1.6   | 1.12 | 0    | 4 |
| IPR003380      | 5.12  | 5.12  | 0    | 0    | 4 |
| IPR003869      | 1.43  | 1     | 1.44 | 1.11 | 4 |
| PTHR19328:SF13 | 1.38  | 1.4   | 1.36 | 0    | 4 |
| IPR013649      | 6.14  | 6.14  | 0    | 0    | 4 |
| IPR013646      | 1.08  | 1     | 0    | 1.13 | 4 |
| IPR002719      | 1.59  | 1.59  | 0    | 0    | 4 |
| IPR019529      | 1.06  | 1.06  | 0    | 0    | 4 |
| IPR019528      | 1.18  | 1.18  | 0    | 0    | 4 |
| IPR002716      | 4.95  | 1     | 4.73 | 7.39 | 4 |
| TIGR01730      | 2.17  | 1     | 2.17 | 0    | 4 |
| IPR018634      | 1.43  | 1     | 1.44 | 0    | 4 |
| IPR021987      | 2.53  | 2.53  | 0    | 0    | 4 |
| PF04524        | 3.38  | 0     | 3.38 | 0    | 4 |
| IPR003647      | 1     | 1     | 1    | 0    | 4 |
| IPR000593      | 1.91  | 1.91  | 0    | 0    | 4 |
| IPR001640      | 1.22  | 1     | 1.22 | 0    | 4 |
| IPR013564      | 1.02  | 0     | 1.02 | 1    | 4 |
| IPR013548      | 3.69  | 3.69  | 0    | 0    | 4 |
| IPR005341      | 1.5   | 1.5   | 0    | 0    | 4 |
| IPR005344      | 1.28  | 1.28  | 0    | 0    | 4 |
| PF12008        | 1.12  | 0     | 1.11 | 1.33 | 4 |
| IPR006867      | 20.5  | 20.5  | 0    | 0    | 4 |
| IPR019020      | 1.35  | 1.43  | 1.29 | 1.43 | 4 |
| IPR010298      | 1.03  | 1.29  | 1.02 | 0    | 4 |
| IPR013159      | 1.12  | 1     | 1.12 | 0    | 4 |
| IPR013150      | 2.39  | 2.43  | 0    | 2.32 | 4 |
| IPR005130      | 1.44  | 1.5   | 1.44 | 1    | 4 |
| IPR007131      | 1.03  | 1     | 2    | 0    | 4 |
| IPR012904      | 1.1   | 1.22  | 1.03 | 1    | 4 |
| IPR013194      | 1.88  | 1.88  | 0    | 0    | 4 |
| PF11942        | 1.04  | 1.04  | 0    | 0    | 4 |
| IPR022105      | 1.76  | 1.76  | 0    | 0    | 4 |
| IPR007699      | 1.73  | 1.73  | 0    | 0    | 4 |
| IPR001026      | 2.43  | 2.43  | 0    | 0    | 4 |
| IPR019400      | 1.67  | 1.68  | 1    | 0    | 4 |
| IPR006730      | 1.84  | 1.84  | 0    | 0    | 4 |
| IPR016053      | 1.37  | 1.65  | 1.26 | 0    | 4 |
| IPR013737      | 2.04  | 2.2   | 2.18 | 1    | 4 |
| IPR013739      | 1.44  | 1     | 1.44 | 0    | 4 |
| IPR011259      | 3.03  | 3.17  | 1    | 1    | 4 |
| IPR020070      | 1.05  | 1.6   | 1.02 | 0    | 4 |
| IPR018123      | 4.35  | 4.35  | 0    | 0    | 4 |
| IPR010056      | 1.87  | 0     | 1.87 | 0    | 4 |
| PF02244        | 9.66  | 9.66  | 0    | 0    | 4 |
| IPR008138      | 1.5   | 1.5   | 0    | 0    | 4 |
| IPR013765      | 1.2   | 1.67  | 1.13 | 0    | 4 |
| IPR018351      | 1.62  | 1.62  | 0    | 0    | 4 |
| IPR008676      | 2.26  | 2.26  | 0    | 0    | 4 |
| IPR005180      | 1.41  | 1.33  | 1.44 | 1.12 | 4 |
| IPR015405      | 1.15  | 1.35  | 1.03 | 0    | 4 |
| IPR006043      | 3.59  | 4.11  | 3.6  | 1.58 | 4 |
| IPR012460      | 1.35  | 1.33  | 1.37 | 1.17 | 4 |
| IPR010699      | 1.55  | 2.58  | 1.45 | 1    | 4 |
| PF03203        | 1.3   | 1     | 1.31 | 0    | 4 |
| PF10018        | 1.33  | 1.33  | 0    | 0    | 4 |
| IPR006587      | 7.22  | 7.22  | 0    | 0    | 4 |
| IPR006588      | 2.86  | 2.86  | 0    | 0    | 4 |
| PF04329        | 1.27  | 0     | 1.27 | 0    | 4 |
| IPR007231      | 1.52  | 1.52  | 0    | 0    | 4 |
| IPR013670      | 1.09  | 0     | 1.09 | 1    | 4 |
| PF11705        | 1.3   | 1.3   | 0    | 0    | 4 |
| IPR005496      | 2.1   | 1.75  | 2.11 | 1    | 4 |
| IPR002728      | 1.68  | 2.11  | 0    | 1    | 4 |
| IPR006911      | 4.27  | 4.27  | 0    | 0    | 4 |
| IPR010713      | 31.25 | 31.25 | 0    | 0    | 4 |
| IPR015386      | 2.18  | 2.3   | 1    | 0    | 4 |
| IPR003612      | 94.86 | 94.86 | 0    | 0    | 4 |

|                |       |       |      |      |   |
|----------------|-------|-------|------|------|---|
| IPR004932      | 1.58  | 1.59  | 1    | 0    | 4 |
| IPR007716      | 1.17  | 1.17  | 0    | 0    | 4 |
| IPR021054      | 4.06  | 4.06  | 0    | 0    | 4 |
| IPR015194      | 1.35  | 1.35  | 0    | 0    | 4 |
| IPR005607      | 4.12  | 4.16  | 1    | 0    | 4 |
| IPR000442      | 2.33  | 4.89  | 1.24 | 0    | 4 |
| IPR005163      | 1.11  | 0     | 1.11 | 0    | 4 |
| IPR018979      | 1.55  | 1.55  | 0    | 0    | 4 |
| IPR018970      | 1.25  | 1.41  | 1.23 | 0    | 4 |
| IPR011679      | 1.29  | 1.29  | 0    | 0    | 4 |
| PTHR13789      | 1.15  | 1.33  | 1    | 0    | 4 |
| IPR015016      | 1.14  | 1.14  | 0    | 0    | 4 |
| IPR004401      | 1.17  | 1.67  | 1.16 | 0    | 4 |
| PTHR22841      | 1     | 1     | 1    | 0    | 4 |
| IPR000347      | 9.29  | 9.29  | 0    | 0    | 4 |
| IPR005592      | 4.47  | 4.47  | 0    | 0    | 4 |
| IPR019432      | 1.3   | 1.8   | 1.21 | 1    | 4 |
| PTHR19959:SF15 | 1.37  | 2     | 1.2  | 0    | 4 |
| TIGR03061      | 1.66  | 0     | 1.67 | 1    | 4 |
| PF09039        | 1.19  | 0     | 1.19 | 0    | 4 |
| IPR002847      | 1.21  | 1     | 1.11 | 1.68 | 4 |
| IPR003715      | 2.25  | 0     | 2.25 | 0    | 4 |
| IPR003711      | 1.42  | 1.86  | 1.41 | 0    | 4 |
| PTHR11632      | 1.06  | 1.2   | 1.04 | 0    | 4 |
| IPR010662      | 1.54  | 1.5   | 1.54 | 0    | 4 |
| PTHR23083:SF24 | 1.04  | 1     | 1.05 | 0    | 4 |
| IPR000607      | 6.29  | 10.25 | 1    | 1    | 4 |
| IPR001554      | 5.76  | 9.33  | 1    | 0    | 4 |
| IPR021841      | 1.26  | 1.26  | 0    | 0    | 4 |
| IPR018119      | 3.72  | 6.12  | 1.16 | 0    | 4 |
| IPR013244      | 1.29  | 1.29  | 0    | 0    | 4 |
| IPR008146      | 2.22  | 3.55  | 2.13 | 1.51 | 4 |
| IPR006899      | 4.11  | 4.11  | 0    | 0    | 4 |
| IPR011509      | 38.4  | 0     | 38.4 | 0    | 4 |
| IPR013905      | 1.3   | 1.3   | 0    | 0    | 4 |
| PF03045        | 1.93  | 1.93  | 0    | 0    | 4 |
| PTHR23154:SF12 | 1.17  | 1.17  | 0    | 0    | 4 |
| IPR000918      | 2.31  | 3.49  | 2.2  | 1.69 | 4 |
| IPR003797      | 2.66  | 0     | 2.66 | 0    | 4 |
| IPR000266      | 1.14  | 2.41  | 1.02 | 1    | 4 |
| IPR001790      | 1.21  | 3.18  | 1.02 | 1    | 4 |
| IPR001130      | 1.74  | 2.45  | 1.66 | 1.91 | 4 |
| IPR022003      | 8.29  | 8.29  | 0    | 0    | 4 |
| IPR022001      | 1     | 0     | 1    | 0    | 4 |
| IPR007956      | 1.23  | 1.88  | 1.08 | 0    | 4 |
| PF03237        | 1.44  | 0     | 1.44 | 1    | 4 |
| IPR021778      | 1.33  | 0     | 1.35 | 1    | 4 |
| IPR021775      | 10.14 | 10.14 | 0    | 0    | 4 |
| IPR021774      | 3.22  | 3.22  | 0    | 0    | 4 |
| IPR006554      | 2.21  | 2.22  | 0    | 1    | 4 |
| IPR003451      | 1.12  | 2     | 1.11 | 0    | 4 |
| IPR003457      | 1.27  | 2     | 1.26 | 0    | 4 |
| IPR008471      | 1.03  | 0     | 1.03 | 1    | 4 |
| IPR009784      | 1.35  | 2.05  | 1.17 | 1    | 4 |
| IPR010744      | 1.59  | 0     | 1.59 | 0    | 4 |
| PTHR21248      | 1.43  | 1.89  | 1.4  | 1    | 4 |
| PTHR23083:SF7  | 1.33  | 1.33  | 0    | 0    | 4 |
| IPR018651      | 1.11  | 1     | 1.11 | 1    | 4 |
| IPR007507      | 1.07  | 1.57  | 1.06 | 0    | 4 |
| IPR011628      | 5.75  | 0     | 5.75 | 0    | 4 |
| IPR000774      | 2.13  | 2     | 2.13 | 0    | 4 |
| IPR018029      | 1     | 1     | 1    | 0    | 4 |
| IPR011427      | 9.67  | 0     | 9.67 | 0    | 4 |
| PTHR23258:SF47 | 2.88  | 3.5   | 1    | 0    | 4 |
| TIGR00426      | 1     | 0     | 1    | 0    | 4 |
| IPR006624      | 10.92 | 11.7  | 2    | 0    | 4 |
| IPR007287      | 1.18  | 1.18  | 0    | 0    | 4 |
| IPR003823      | 2.31  | 4.25  | 1.85 | 0    | 4 |
| IPR012969      | 1.2   | 1.25  | 1    | 0    | 4 |

|                |       |       |      |      |   |
|----------------|-------|-------|------|------|---|
| IPR021153      | 1.01  | 1     | 1.01 | 0    | 4 |
| IPR006182      | 1.43  | 1     | 1.43 | 0    | 4 |
| IPR006457      | 10.5  | 0     | 6    | 12   | 4 |
| IPR007582      | 1.93  | 1.93  | 0    | 0    | 4 |
| IPR007581      | 1.13  | 2.07  | 1.07 | 1    | 4 |
| IPR010603      | 1.05  | 0     | 1.05 | 0    | 4 |
| IPR013544      | 6     | 6     | 0    | 0    | 4 |
| IPR013543      | 1.74  | 3.19  | 1.31 | 1    | 4 |
| IPR006842      | 4.18  | 1     | 4.21 | 4    | 4 |
| PTHR23213:SF18 | 2.68  | 3.24  | 1    | 1    | 4 |
| IPR018756      | 1.17  | 0     | 1.17 | 0    | 4 |
| IPR015252      | 1.67  | 1.67  | 0    | 0    | 4 |
| IPR002872      | 1.16  | 1.66  | 1.09 | 1.33 | 4 |
| IPR000435      | 4.78  | 4.78  | 0    | 0    | 4 |
| PF12162        | 2.12  | 2.12  | 0    | 0    | 4 |
| PF10519        | 5.96  | 5.96  | 0    | 0    | 4 |
| IPR002466      | 2.13  | 2.13  | 0    | 0    | 4 |
| IPR004125      | 1.05  | 1.49  | 1.01 | 1    | 4 |
| PTHR23155:SF37 | 5.72  | 8     | 2.3  | 0    | 4 |
| IPR000631      | 1.07  | 1.2   | 1.06 | 1.11 | 4 |
| IPR021104      | 1.84  | 1     | 1.84 | 0    | 4 |
| IPR021101      | 1     | 1     | 0    | 0    | 4 |
| IPR001951      | 2.46  | 2.46  | 0    | 0    | 4 |
| IPR001950      | 1.62  | 3.52  | 1.02 | 1.04 | 4 |
| IPR000392      | 1.67  | 1     | 1.64 | 2.24 | 4 |
| IPR000395      | 2.22  | 0     | 2.22 | 0    | 4 |
| IPR000398      | 1.12  | 1.49  | 1.07 | 1    | 4 |
| IPR015945      | 1.15  | 1.93  | 1.06 | 1.35 | 4 |
| IPR004670      | 1.31  | 1     | 1.31 | 0    | 4 |
| IPR015360      | 1.21  | 1.22  | 1    | 0    | 4 |
| IPR002636      | 6.1   | 0     | 6.1  | 0    | 4 |
| IPR010465      | 2.41  | 2.41  | 0    | 0    | 4 |
| IPR002092      | 1.8   | 1.88  | 1.14 | 0    | 4 |
| IPR010281      | 2.72  | 5.75  | 2.65 | 1    | 4 |
| IPR014906      | 1.69  | 1.69  | 0    | 0    | 4 |
| IPR005197      | 3.52  | 4.42  | 1.11 | 0    | 4 |
| IPR003741      | 2.38  | 0     | 2.47 | 1.29 | 4 |
| PF05804        | 3.81  | 3.81  | 0    | 0    | 4 |
| PTHR10593      | 3.21  | 3.38  | 1    | 0    | 4 |
| PTHR10596      | 1     | 1     | 1    | 0    | 4 |
| PTHR11640      | 3.33  | 3.33  | 0    | 0    | 3 |
| PTHR11647      | 1.04  | 1     | 1.04 | 1    | 3 |
| IPR010637      | 2.54  | 0     | 2.54 | 0    | 3 |
| IPR010632      | 2.5   | 2.5   | 0    | 0    | 3 |
| IPR020587      | 1.12  | 2.03  | 1.04 | 1    | 3 |
| IPR001503      | 4.03  | 6.02  | 1.47 | 0    | 3 |
| IPR021721      | 1.23  | 1.23  | 0    | 0    | 3 |
| IPR008833      | 1.56  | 1.56  | 0    | 0    | 3 |
| IPR003468      | 1.27  | 1     | 1.27 | 0    | 3 |
| IPR002782      | 1.17  | 1.21  | 1.22 | 1.03 | 3 |
| IPR002259      | 2.77  | 2.77  | 0    | 0    | 3 |
| PF12114        | 4.56  | 4.56  | 0    | 0    | 3 |
| IPR011020      | 1.25  | 1.29  | 1.22 | 1    | 3 |
| IPR010770      | 1.16  | 1.16  | 0    | 0    | 3 |
| IPR003696      | 1.44  | 0     | 1.47 | 1.1  | 3 |
| IPR007638      | 1.42  | 1.42  | 0    | 0    | 3 |
| IPR000060      | 2.11  | 3     | 2.13 | 1    | 3 |
| IPR000062      | 1.15  | 1.34  | 1.11 | 1.44 | 3 |
| IPR021917      | 1.31  | 1.32  | 1    | 0    | 3 |
| IPR005540      | 11.38 | 11.38 | 0    | 0    | 3 |
| IPR005541      | 13.43 | 13.43 | 0    | 0    | 3 |
| IPR009939      | 1.6   | 1.67  | 1    | 0    | 3 |
| IPR013956      | 1.06  | 1.06  | 0    | 0    | 3 |
| IPR004083      | 4     | 4     | 0    | 0    | 3 |
| PTHR13847      | 1     | 1     | 1    | 1    | 3 |
| PTHR14453      | 2     | 2     | 0    | 0    | 3 |
| PTHR10178:SF17 | 29    | 29    | 0    | 0    | 3 |
| IPR006029      | 24.6  | 25.84 | 1    | 0    | 3 |
| IPR007775      | 3.5   | 3.5   | 0    | 0    | 3 |

|                |       |       |      |      |   |
|----------------|-------|-------|------|------|---|
| IPR000292      | 1.66  | 1.64  | 1.69 | 1.22 | 3 |
| PF12431        | 1.27  | 0     | 1.27 | 0    | 3 |
| PF12434        | 1.05  | 0     | 1.05 | 0    | 3 |
| IPR010504      | 4.15  | 4.15  | 0    | 0    | 3 |
| IPR010505      | 1.22  | 1.18  | 1.24 | 1.02 | 3 |
| IPR018076      | 4.26  | 1.4   | 4.26 | 4.47 | 3 |
| PF12213        | 1.21  | 1.21  | 0    | 0    | 3 |
| PF01316        | 1.36  | 0     | 1.36 | 0    | 3 |
| IPR009555      | 4     | 0     | 4    | 0    | 3 |
| PTHR13789:SF5  | 1.11  | 1.33  | 1    | 0    | 3 |
| IPR006617      | 17.42 | 17.42 | 0    | 0    | 3 |
| PTHR10066:SF12 | 1.3   | 1.46  | 1.2  | 0    | 3 |
| IPR008286      | 1.76  | 1.3   | 1.78 | 1    | 3 |
| IPR002706      | 2.05  | 2.05  | 0    | 0    | 3 |
| IPR002708      | 1.24  | 0     | 1.04 | 1.82 | 3 |
| IPR006939      | 1.76  | 1.76  | 0    | 0    | 3 |
| IPR006937      | 3.02  | 13.29 | 1.13 | 0    | 3 |
| IPR014832      | 1.46  | 1     | 1.47 | 0    | 3 |
| IPR014833      | 1.56  | 1.5   | 1.56 | 0    | 3 |
| IPR014836      | 3.16  | 3.16  | 0    | 0    | 3 |
| IPR021995      | 1.09  | 1.62  | 1    | 0    | 3 |
| IPR007865      | 1.35  | 2.57  | 1.09 | 0    | 3 |
| IPR004006      | 1.52  | 1.54  | 1.52 | 1    | 3 |
| IPR004003      | 1.16  | 1.43  | 1.13 | 1    | 3 |
| IPR015995      | 1.64  | 1     | 1.7  | 1    | 3 |
| IPR004910      | 2.88  | 2.88  | 0    | 0    | 3 |
| IPR002513      | 2.69  | 2.5   | 2.69 | 0    | 3 |
| IPR006879      | 1.15  | 1     | 1.15 | 0    | 3 |
| IPR006876      | 2.46  | 2.46  | 0    | 0    | 3 |
| PD503580       | 1.33  | 0     | 1.33 | 0    | 3 |
| PF12217        | 1.25  | 0     | 1.25 | 0    | 3 |
| PF12215        | 1.79  | 2.46  | 1.03 | 2.86 | 3 |
| PTHR23224:SF61 | 1.36  | 1.36  | 0    | 0    | 3 |
| IPR001476      | 1.3   | 2.54  | 1.19 | 1    | 3 |
| IPR008905      | 1.37  | 1.37  | 0    | 0    | 3 |
| IPR002828      | 1.21  | 2.34  | 1.12 | 1.21 | 3 |
| IPR008593      | 1.33  | 1.5   | 1.33 | 0    | 3 |
| IPR005140      | 2.31  | 2.49  | 0    | 2.02 | 3 |
| IPR005142      | 2.3   | 2.55  | 1    | 2.02 | 3 |
| IPR018992      | 1.56  | 1.56  | 0    | 0    | 3 |
| PTHR10499:SF86 | 1.17  | 1.15  | 1.2  | 0    | 3 |
| PTHR10499:SF80 | 1     | 0     | 1    | 0    | 3 |
| PTHR10527      | 1.66  | 1.66  | 0    | 0    | 3 |
| IPR015262      | 1.02  | 1     | 1.02 | 0    | 3 |
| IPR003318      | 2.29  | 0     | 2.29 | 0    | 3 |
| IPR001203      | 2.3   | 0     | 2.13 | 3    | 3 |
| PF11953        | 1.19  | 0     | 1.19 | 0    | 3 |
| IPR022137      | 2.22  | 2.22  | 0    | 0    | 3 |
| IPR013510      | 1.74  | 0     | 1.74 | 0    | 3 |
| IPR001901      | 1.06  | 1.56  | 1.02 | 1    | 3 |
| IPR004628      | 1.31  | 0     | 1.31 | 1.67 | 3 |
| IPR012644      | 1.06  | 1.5   | 1.05 | 0    | 3 |
| IPR015917      | 6.75  | 6.75  | 0    | 0    | 3 |
| IPR001015      | 1.15  | 1.47  | 1.11 | 1    | 3 |
| IPR019412      | 1.77  | 1.8   | 1.33 | 0    | 3 |
| PF08007        | 1.38  | 1.71  | 1.18 | 0    | 3 |
| TIGR02353      | 1.09  | 1     | 1.1  | 0    | 3 |
| IPR013723      | 1.1   | 1.1   | 0    | 0    | 3 |
| IPR010605      | 5.57  | 5.57  | 0    | 0    | 3 |
| IPR010600      | 6.22  | 6.22  | 0    | 0    | 3 |
| IPR010609      | 1.88  | 0     | 1.88 | 0    | 3 |
| IPR011715      | 2.5   | 2.5   | 0    | 0    | 3 |
| PTHR11452      | 1.44  | 1.3   | 1.67 | 0    | 3 |
| IPR007446      | 1.01  | 1     | 1.01 | 0    | 3 |
| IPR019308      | 1.72  | 1.78  | 1    | 0    | 3 |
| IPR009453      | 1.18  | 1.18  | 0    | 0    | 3 |
| IPR009457      | 3.59  | 3.59  | 0    | 0    | 3 |
| PTHR23082      | 1.05  | 1.05  | 0    | 0    | 3 |
| PTHR14218      | 1.28  | 1     | 1.38 | 1    | 3 |

|                |       |      |       |      |   |
|----------------|-------|------|-------|------|---|
| PTHR21222      | 1.08  | 1.14 | 1     | 0    | 3 |
| IPR007603      | 3.13  | 3.16 | 1     | 0    | 3 |
| PF08394        | 1.73  | 0    | 0     | 1.73 | 3 |
| IPR013597      | 2.52  | 1    | 2.52  | 3.33 | 3 |
| IPR019141      | 1.79  | 1.79 | 0     | 0    | 3 |
| IPR019143      | 2.83  | 2.83 | 0     | 0    | 3 |
| IPR019496      | 1.09  | 1.09 | 0     | 0    | 3 |
| IPR021940      | 7.38  | 7.38 | 0     | 0    | 3 |
| IPR006214      | 1.78  | 5.14 | 1.29  | 0    | 3 |
| IPR011525      | 1     | 1    | 0     | 0    | 3 |
| PTHR23022:SF10 | 2.03  | 2.27 | 1.84  | 0    | 3 |
| IPR013969      | 1.06  | 1.08 | 1.06  | 1    | 3 |
| IPR013967      | 1.06  | 1.06 | 0     | 0    | 3 |
| IPR004600      | 1.22  | 1.22 | 0     | 0    | 3 |
| PTHR23323      | 1.33  | 1.33 | 0     | 0    | 3 |
| IPR009640      | 16.67 | 0    | 16.67 | 0    | 3 |
| IPR022021      | 4     | 4    | 0     | 0    | 3 |
| IPR012862      | 5     | 5.67 | 1     | 0    | 3 |
| IPR006861      | 2.88  | 2.88 | 0     | 0    | 3 |
| IPR021756      | 1.06  | 1.06 | 0     | 0    | 3 |
| IPR021755      | 1.05  | 1.05 | 0     | 0    | 3 |
| IPR022225      | 1.24  | 0    | 1.24  | 0    | 3 |
| IPR022228      | 6.43  | 6.43 | 0     | 0    | 3 |
| PF08406        | 1.32  | 0    | 1.32  | 1    | 3 |
| IPR008867      | 1.04  | 1    | 1.04  | 1    | 3 |
| IPR011978      | 1.56  | 1    | 1.57  | 0    | 3 |
| IPR007199      | 1.4   | 1.4  | 0     | 0    | 3 |
| IPR007191      | 1.24  | 1.24 | 0     | 0    | 3 |
| IPR007193      | 1.28  | 1.28 | 0     | 0    | 3 |
| IPR003435      | 1.46  | 2.5  | 1     | 0    | 3 |
| IPR003431      | 1.14  | 1    | 1.18  | 0    | 3 |
| IPR007220      | 1.12  | 1.12 | 0     | 0    | 3 |
| IPR016166      | 1     | 1    | 1     | 0    | 3 |
| IPR013604      | 39.9  | 39.9 | 0     | 0    | 3 |
| IPR021849      | 4.12  | 4.12 | 0     | 0    | 3 |
| IPR006903      | 1.21  | 1.21 | 0     | 0    | 3 |
| PF12161        | 1.64  | 0    | 1.65  | 1.58 | 3 |
| PF03403        | 1.64  | 2.06 | 1.49  | 1    | 3 |
| IPR006433      | 1.35  | 0    | 1.35  | 0    | 3 |
| IPR000558      | 4.85  | 4.85 | 0     | 0    | 3 |
| PF05648        | 2.78  | 2.78 | 0     | 0    | 3 |
| IPR010420      | 4.71  | 4.71 | 0     | 0    | 3 |
| IPR001441      | 1.25  | 1.95 | 1.18  | 1.33 | 3 |
| IPR019060      | 1.96  | 1    | 1.98  | 0    | 3 |
| IPR015183      | 1.23  | 0    | 1.23  | 0    | 3 |
| IPR015185      | 1     | 0    | 1     | 0    | 3 |
| IPR005636      | 1.74  | 2.39 | 1.59  | 0    | 3 |
| IPR005633      | 1.4   | 1.4  | 0     | 0    | 3 |
| IPR002366      | 13    | 17.8 | 1     | 0    | 3 |
| IPR008958      | 7.46  | 7.46 | 0     | 0    | 3 |
| IPR013803      | 3.64  | 3.64 | 0     | 0    | 3 |
| PTHR13919      | 1.33  | 1.33 | 0     | 0    | 3 |
| PTHR22963      | 1.2   | 1.2  | 0     | 0    | 3 |
| IPR008039      | 1     | 0    | 1     | 1    | 3 |
| PF10068        | 2.23  | 0    | 2.23  | 0    | 3 |
| IPR008707      | 1.26  | 1    | 1.26  | 0    | 3 |
| IPR002742      | 1.15  | 0    | 1.14  | 1.17 | 3 |
| IPR000692      | 1.39  | 1.62 | 0     | 1.04 | 3 |
| IPR000690      | 1     | 1    | 0     | 0    | 3 |
| IPR001872      | 1.15  | 1    | 1.15  | 0    | 3 |
| IPR013680      | 2.43  | 2.43 | 0     | 0    | 3 |
| IPR012551      | 3.91  | 0    | 3.91  | 0    | 3 |
| IPR015683      | 5.33  | 6.2  | 1     | 0    | 3 |
| IPR019563      | 1.87  | 0    | 1.89  | 1    | 3 |
| IPR012941      | 3.29  | 4.75 | 1.24  | 0    | 3 |
| IPR012944      | 39.79 | 0    | 39.79 | 0    | 3 |
| PF07036        | 5.12  | 5.12 | 0     | 0    | 3 |
| IPR003682      | 1.03  | 1.36 | 1.03  | 1    | 3 |
| IPR013521      | 3.2   | 6.09 | 1.09  | 0    | 3 |



|                |      |       |      |      |   |
|----------------|------|-------|------|------|---|
| IPR000334      | 1.78 | 1.86  | 1.5  | 0    | 3 |
| IPR005300      | 1.06 | 1     | 1.06 | 0    | 3 |
| IPR018532      | 1.59 | 1.06  | 1.71 | 0    | 3 |
| IPR018537      | 1.58 | 0     | 1.58 | 0    | 3 |
| IPR006827      | 2.41 | 1     | 2.44 | 0    | 3 |
| IPR008579      | 1.92 | 3.83  | 1.82 | 0    | 3 |
| IPR008391      | 1.4  | 1.5   | 1.41 | 1    | 3 |
| IPR021622      | 1.38 | 1.38  | 0    | 0    | 3 |
| IPR000988      | 1.61 | 1.72  | 0    | 1    | 3 |
| IPR003724      | 1.31 | 1     | 1.32 | 1    | 3 |
| IPR008523      | 1.69 | 0     | 1.69 | 0    | 3 |
| PF12369        | 1.89 | 1.89  | 0    | 0    | 3 |
| PTHR12546      | 1    | 1     | 0    | 0    | 3 |
| IPR021124      | 1.18 | 0     | 1.19 | 1.11 | 3 |
| IPR009105      | 1.12 | 0     | 1.12 | 0    | 3 |
| PTHR18973      | 1    | 1     | 1    | 0    | 3 |
| PTHR18976      | 1.08 | 1     | 1.1  | 1    | 3 |
| PF11980        | 9.2  | 9.2   | 0    | 0    | 3 |
| IPR003688      | 1.78 | 0     | 1.79 | 1    | 3 |
| IPR007387      | 3.21 | 1     | 3.24 | 1    | 3 |
| IPR015966      | 1.12 | 1.12  | 0    | 0    | 3 |
| IPR015965      | 1.09 | 1.1   | 1    | 0    | 3 |
| IPR019198      | 1.19 | 0     | 1.21 | 1.14 | 3 |
| IPR015348      | 1.42 | 1.42  | 0    | 0    | 3 |
| IPR019447      | 1.13 | 1.13  | 0    | 0    | 3 |
| PF05065        | 1.6  | 0     | 1.61 | 1    | 3 |
| IPR014928      | 2.61 | 2.71  | 1    | 0    | 3 |
| IPR013934      | 1.06 | 1.06  | 0    | 0    | 3 |
| PTHR12197      | 1.33 | 1.33  | 0    | 0    | 3 |
| IPR005301      | 3.73 | 3.73  | 0    | 0    | 3 |
| IPR006270      | 7.81 | 0     | 7.81 | 0    | 3 |
| IPR010934      | 6.19 | 12.76 | 1.15 | 0    | 3 |
| IPR021090      | 4.33 | 4.33  | 0    | 0    | 3 |
| IPR021092      | 1.11 | 1.11  | 0    | 0    | 3 |
| IPR009613      | 1.26 | 1.73  | 1    | 0    | 3 |
| IPR022018      | 1.61 | 1.61  | 0    | 0    | 3 |
| IPR009567      | 1.12 | 1.12  | 0    | 0    | 3 |
| PTHR21091      | 1    | 1     | 1    | 0    | 3 |
| IPR008851      | 1.5  | 1.5   | 0    | 0    | 3 |
| IPR003447      | 2.16 | 0     | 2.16 | 2    | 3 |
| IPR013638      | 2.26 | 2.31  | 0    | 1    | 3 |
| IPR013630      | 1.24 | 0     | 1.25 | 1    | 3 |
| IPR004140      | 4.89 | 4.89  | 0    | 0    | 3 |
| PF12137        | 1.01 | 0     | 1.01 | 0    | 3 |
| IPR006953      | 1.07 | 1.07  | 0    | 0    | 3 |
| IPR006957      | 5.7  | 5.7   | 0    | 0    | 3 |
| IPR020958      | 1    | 0     | 1    | 0    | 3 |
| IPR020956      | 1.04 | 1.04  | 0    | 0    | 3 |
| IPR021839      | 2.83 | 2.83  | 0    | 0    | 3 |
| IPR021933      | 1.31 | 1.31  | 0    | 0    | 3 |
| IPR018641      | 1.09 | 1     | 1.09 | 1    | 3 |
| IPR018649      | 1.61 | 0     | 1.53 | 2.25 | 3 |
| IPR002076      | 7.49 | 7.49  | 0    | 0    | 3 |
| IPR007517      | 1.57 | 2.33  | 1    | 1    | 3 |
| IPR007518      | 1.58 | 1.58  | 0    | 0    | 3 |
| IPR000568      | 1.71 | 8.89  | 1.1  | 1    | 3 |
| IPR019257      | 1.18 | 1.68  | 1.12 | 1    | 3 |
| IPR008631      | 1.39 | 1.33  | 1.5  | 2    | 3 |
| IPR005003      | 8.42 | 0     | 8.42 | 0    | 3 |
| PTHR15704      | 1.09 | 1.09  | 0    | 0    | 3 |
| PTHR11107:SF5  | 1    | 0     | 1    | 1    | 3 |
| IPR001892      | 1.11 | 2.03  | 1.02 | 1    | 3 |
| TIGR02136      | 1.23 | 0     | 1.24 | 1.12 | 3 |
| IPR007757      | 1.78 | 2.25  | 1.07 | 1    | 3 |
| IPR019099      | 1.08 | 1     | 1.09 | 0    | 3 |
| IPR005648      | 1.16 | 2     | 1.16 | 0    | 3 |
| PTHR19241:SF10 | 5.25 | 5.25  | 0    | 0    | 3 |
| IPR015151      | 2.91 | 2.91  | 0    | 0    | 3 |
| IPR003648      | 1.7  | 1.7   | 0    | 0    | 3 |

|                |       |       |      |      |   |
|----------------|-------|-------|------|------|---|
| IPR011430      | 1.04  | 1.04  | 0    | 0    | 3 |
| IPR003171      | 1.22  | 1.85  | 1.16 | 1    | 3 |
| IPR013128      | 1.5   | 1.5   | 0    | 0    | 3 |
| IPR013123      | 1.52  | 1.15  | 1.54 | 0    | 3 |
| PF06747        | 4.65  | 4.65  | 0    | 0    | 3 |
| PF11875        | 1.19  | 1.19  | 0    | 0    | 3 |
| PF11879        | 1.78  | 1.78  | 0    | 0    | 3 |
| TIGR03407      | 1.23  | 0     | 1.23 | 0    | 3 |
| PTHR22963:SF13 | 1.27  | 1.27  | 0    | 0    | 3 |
| IPR022251      | 11.33 | 11.33 | 0    | 0    | 3 |
| IPR006639      | 3.13  | 3.57  | 0    | 1    | 3 |
| IPR003370      | 3.03  | 2.43  | 3.08 | 1.5  | 3 |
| IPR003372      | 1.09  | 1.5   | 1    | 0    | 3 |
| IPR007272      | 2.74  | 2.24  | 2.78 | 2.56 | 3 |
| IPR009717      | 3.05  | 0     | 3.05 | 0    | 3 |
| IPR009716      | 2.45  | 2.45  | 0    | 0    | 3 |
| IPR021077      | 1.47  | 0     | 1.47 | 0    | 3 |
| IPR011089      | 1.37  | 0     | 1.37 | 1.33 | 3 |
| IPR014813      | 1.12  | 1.12  | 0    | 0    | 3 |
| IPR012971      | 1.17  | 1.17  | 0    | 0    | 3 |
| IPR012974      | 2.42  | 2.42  | 0    | 0    | 3 |
| IPR012976      | 2.57  | 3.34  | 0    | 1    | 3 |
| IPR020481      | 1.09  | 0     | 1.09 | 1    | 3 |
| IPR006773      | 2.09  | 2.09  | 0    | 0    | 3 |
| IPR007844      | 2.07  | 1     | 2.07 | 0    | 3 |
| IPR003654      | 7.19  | 7.19  | 0    | 0    | 3 |
| IPR003651      | 1.44  | 1.78  | 1.45 | 1.17 | 3 |
| IPR013578      | 1.17  | 1.31  | 1.06 | 0    | 3 |
| IPR013573      | 1.41  | 3     | 1.4  | 0    | 3 |
| IPR013574      | 1.38  | 0     | 1.38 | 0    | 3 |
| IPR005373      | 1.5   | 1.5   | 0    | 0    | 3 |
| IPR002687      | 2.46  | 3.41  | 0    | 1    | 3 |
| IPR004971      | 1.41  | 1.42  | 1    | 0    | 3 |
| IPR020850      | 3.03  | 3.03  | 0    | 0    | 3 |
| PTHR20930      | 1.32  | 1.32  | 0    | 0    | 3 |
| IPR019017      | 1.05  | 0     | 1.05 | 0    | 3 |
| IPR018768      | 1.02  | 0     | 1.02 | 0    | 3 |
| IPR015225      | 1.04  | 0     | 1.04 | 0    | 3 |
| PTHR10066      | 1.27  | 1.19  | 1.38 | 1    | 3 |
| IPR010308      | 3.58  | 3.58  | 0    | 0    | 3 |
| IPR000400      | 1.12  | 0     | 1.12 | 0    | 3 |
| PF12612        | 1.17  | 1.17  | 0    | 0    | 3 |
| PTHR23233      | 1.31  | 1.31  | 0    | 0    | 3 |
| IPR021110      | 1     | 1     | 0    | 0    | 3 |
| IPR019601      | 1.04  | 1.04  | 1    | 0    | 3 |
| IPR012582      | 1     | 1     | 0    | 0    | 3 |
| IPR021805      | 3.62  | 3.62  | 0    | 0    | 3 |
| IPR003851      | 27.89 | 27.89 | 0    | 0    | 3 |
| TIGR01784      | 3.94  | 1     | 3.84 | 14   | 3 |
| PF05253        | 4.1   | 4.1   | 0    | 0    | 3 |
| IPR022112      | 1.88  | 0     | 1.92 | 1.44 | 3 |
| IPR022113      | 1.81  | 1.81  | 0    | 0    | 3 |
| PTHR10032:SF30 | 1     | 1     | 0    | 0    | 3 |
| IPR003526      | 1.03  | 1.27  | 1.02 | 0    | 3 |
| PF06333        | 1.39  | 1.39  | 0    | 0    | 3 |
| IPR018870      | 1.05  | 1.05  | 0    | 0    | 3 |
| IPR018875      | 1.36  | 0     | 1.36 | 0    | 3 |
| IPR009582      | 1.26  | 1.26  | 0    | 0    | 3 |
| IPR001039      | 95.43 | 95.43 | 0    | 0    | 3 |
| IPR019471      | 9     | 9     | 0    | 0    | 3 |
| IPR015929      | 1.03  | 1     | 1.03 | 1    | 3 |
| PTHR10159      | 1     | 1     | 1    | 0    | 3 |
| PTHR22767:SF2  | 1.5   | 1.5   | 0    | 0    | 3 |
| IPR016516      | 2.93  | 0     | 2.93 | 0    | 3 |
| PF09816        | 1.25  | 1.25  | 0    | 0    | 3 |
| IPR021673      | 3.38  | 3.38  | 0    | 0    | 3 |
| IPR006708      | 1.23  | 1.23  | 0    | 0    | 3 |
| IPR003758      | 1.04  | 1.33  | 1.03 | 0    | 3 |
| IPR007074      | 2.35  | 3.66  | 1.79 | 1.67 | 3 |

|                |       |       |      |      |   |
|----------------|-------|-------|------|------|---|
| IPR013741      | 1.14  | 0     | 1.14 | 1    | 3 |
| PD013253       | 1     | 1     | 1    | 0    | 3 |
| PTHR10584      | 1     | 1     | 1    | 0    | 3 |
| IPR010623      | 1.71  | 0     | 1.71 | 0    | 3 |
| PTHR23154:SF51 | 2.21  | 3     | 1.17 | 0    | 3 |
| IPR020069      | 1.03  | 2.1   | 1.02 | 0    | 3 |
| IPR021887      | 2.18  | 2.18  | 0    | 0    | 3 |
| IPR008803      | 1.74  | 1.74  | 0    | 0    | 3 |
| IPR007297      | 1.56  | 0     | 1.56 | 1    | 3 |
| IPR012315      | 2.86  | 2.86  | 0    | 0    | 3 |
| PF10469        | 1.84  | 1.84  | 0    | 0    | 3 |
| PF05708        | 1.08  | 1     | 1.08 | 1    | 3 |
| PF06561        | 1.1   | 1.09  | 1.11 | 0    | 3 |
| IPR007621      | 1.81  | 1.77  | 1.81 | 0    | 3 |
| IPR000077      | 1.16  | 1.28  | 0    | 1    | 3 |
| IPR013208      | 1.5   | 2.42  | 1.37 | 0    | 3 |
| IPR013209      | 2.07  | 2.11  | 1.33 | 0    | 3 |
| IPR021961      | 1.04  | 0     | 1.04 | 1    | 3 |
| IPR021968      | 1.02  | 0     | 1.02 | 0    | 3 |
| IPR011541      | 1.39  | 1.43  | 1.39 | 1.21 | 3 |
| IPR013940      | 1.28  | 1.28  | 0    | 0    | 3 |
| IPR013945      | 1.09  | 1.09  | 0    | 0    | 3 |
| PTHR11200      | 1.6   | 1.6   | 0    | 0    | 3 |
| IPR007549      | 1.06  | 0     | 1.07 | 1    | 3 |
| PTHR13871      | 1     | 1     | 0    | 0    | 3 |
| IPR005053      | 1.94  | 0     | 1.94 | 0    | 3 |
| IPR004150      | 1.18  | 0     | 1.18 | 0    | 3 |
| PF11569        | 3     | 4     | 1    | 0    | 3 |
| IPR006035      | 1.99  | 2.24  | 2    | 1.48 | 3 |
| IPR021021      | 3.6   | 0     | 3.6  | 0    | 3 |
| IPR022044      | 1.17  | 0     | 1.17 | 0    | 3 |
| IPR015293      | 1.04  | 0     | 1.04 | 1    | 3 |
| IPR010518      | 1     | 0     | 1    | 0    | 3 |
| IPR010514      | 1.13  | 1     | 1.13 | 0    | 3 |
| IPR007991      | 1.45  | 1.45  | 0    | 0    | 3 |
| PF11842        | 1.02  | 1     | 1.02 | 1    | 3 |
| IPR007789      | 12.29 | 12.29 | 0    | 0    | 3 |
| IPR014161      | 1.08  | 1     | 1.08 | 0    | 3 |
| PTHR22904:SF15 | 2     | 2     | 0    | 0    | 3 |
| IPR001813      | 3.77  | 5.24  | 1    | 1.24 | 3 |
| IPR016147      | 4.95  | 1     | 5.01 | 0    | 3 |
| IPR016148      | 5.72  | 1     | 5.8  | 0    | 3 |
| IPR013661      | 1.53  | 0     | 1.53 | 0    | 3 |
| IPR012531      | 2     | 2.12  | 1.5  | 0    | 3 |
| IPR012530      | 1.36  | 5     | 1    | 0    | 3 |
| IPR002733      | 1.15  | 1.37  | 1.05 | 1.11 | 3 |
| PTHR11731      | 1     | 1     | 1    | 1    | 3 |
| IPR014825      | 1.36  | 3     | 1.34 | 1.2  | 3 |
| PTHR10044      | 1.6   | 1.6   | 0    | 0    | 3 |
| IPR015420      | 1     | 1     | 0    | 0    | 3 |
| IPR003760      | 1.83  | 2     | 1.84 | 1.62 | 3 |
| PTHR17598      | 1     | 0     | 1    | 0    | 3 |
| IPR010270      | 1.29  | 0     | 1.29 | 0    | 3 |
| IPR003595      | 1.57  | 1.57  | 0    | 0    | 3 |
| PTHR11271:SF7  | 1.12  | 0     | 1.12 | 1    | 3 |
| IPR019204      | 1.09  | 0     | 1.21 | 1.03 | 3 |
| PTHR23125:SF36 | 1.2   | 1.2   | 0    | 0    | 3 |
| PF12022        | 1.34  | 1.34  | 0    | 0    | 3 |
| IPR015217      | 1.09  | 0     | 1.09 | 0    | 3 |
| IPR018796      | 1.09  | 1.09  | 0    | 0    | 3 |
| IPR005617      | 2.86  | 2.93  | 1    | 0    | 3 |
| IPR002348      | 8.81  | 8.81  | 0    | 0    | 3 |
| IPR010333      | 1.41  | 0     | 1.41 | 0    | 3 |
| IPR013170      | 1.52  | 1.52  | 0    | 0    | 3 |
| IPR013171      | 1.25  | 3.08  | 1.03 | 0    | 3 |
| IPR012887      | 1.8   | 2     | 1    | 0    | 3 |
| IPR012886      | 1.4   | 2.12  | 1.1  | 0    | 3 |
| IPR012882      | 1.04  | 1.04  | 0    | 0    | 3 |
| PTHR23241:SF11 | 1.8   | 3.83  | 1.03 | 1    | 3 |

|                |       |       |      |      |   |
|----------------|-------|-------|------|------|---|
| IPR004209      | 1.17  | 1.12  | 1.08 | 1.7  | 3 |
| IPR018965      | 1.68  | 1.68  | 0    | 0    | 3 |
| IPR018966      | 1.4   | 1.83  | 1.14 | 1    | 3 |
| IPR018960      | 1.27  | 1.88  | 1.16 | 0    | 3 |
| IPR006667      | 1.46  | 3.89  | 1.27 | 2.09 | 3 |
| IPR007133      | 1.52  | 1.52  | 0    | 0    | 3 |
| IPR000675      | 4.62  | 3.79  | 5.21 | 0    | 3 |
| IPR010610      | 1.48  | 0     | 1.48 | 0    | 3 |
| IPR008217      | 1.57  | 3.25  | 1.3  | 1.64 | 3 |
| IPR019585      | 2.37  | 2.44  | 1    | 1    | 3 |
| IPR015005      | 1.09  | 1     | 1.11 | 1    | 3 |
| PTHR11117      | 1.03  | 1     | 1.03 | 1    | 3 |
| PTHR11113      | 1.12  | 1.29  | 1.12 | 1    | 3 |
| IPR012925      | 1.37  | 0     | 1.37 | 0    | 3 |
| IPR018829      | 1     | 1     | 0    | 0    | 3 |
| IPR003511      | 3.01  | 3.01  | 0    | 0    | 3 |
| IPR001910      | 2.15  | 3.11  | 1.96 | 2.67 | 3 |
| IPR013506      | 1.62  | 1     | 1.67 | 0    | 3 |
| IPR000353      | 36.57 | 36.57 | 0    | 0    | 3 |
| IPR013554      | 1.07  | 0     | 1.07 | 0    | 3 |
| IPR013555      | 5.08  | 5.08  | 0    | 0    | 3 |
| IPR005326      | 1.63  | 1.63  | 0    | 0    | 3 |
| IPR005320      | 1.26  | 1.14  | 1.27 | 0    | 3 |
| IPR019280      | 1.49  | 1.49  | 0    | 0    | 3 |
| IPR019427      | 11.17 | 11.17 | 0    | 0    | 3 |
| IPR002675      | 1.39  | 1.42  | 0    | 1    | 3 |
| PTHR10169      | 1     | 1     | 1    | 0    | 3 |
| IPR010428      | 1.37  | 0     | 1.37 | 0    | 3 |
| IPR014942      | 1.74  | 1.4   | 1.76 | 1.55 | 3 |
| IPR014945      | 1.44  | 0     | 1.44 | 0    | 3 |
| IPR013992      | 1.63  | 1.63  | 0    | 0    | 3 |
| IPR013996      | 2.33  | 2.33  | 0    | 0    | 3 |
| PTHR19959:SF21 | 1.4   | 1.5   | 1.33 | 1    | 3 |
| IPR010441      | 3.5   | 3.5   | 0    | 0    | 3 |
| PTHR20961      | 1.22  | 1.46  | 1.06 | 1    | 3 |
| IPR021648      | 1.11  | 1.11  | 0    | 0    | 3 |
| IPR021645      | 1.72  | 1.75  | 1    | 0    | 3 |
| PTHR22955      | 7.07  | 7.07  | 0    | 0    | 3 |
| IPR013713      | 2.25  | 2.25  | 0    | 0    | 3 |
| IPR013717      | 1.28  | 1.28  | 0    | 0    | 3 |
| IPR009360      | 1.07  | 1.07  | 0    | 0    | 3 |
| IPR009362      | 1.68  | 1     | 1.69 | 1.75 | 3 |
| IPR010674      | 1.32  | 1.4   | 0    | 1    | 3 |
| TIGR02971      | 1.56  | 0     | 1.56 | 0    | 3 |
| IPR001548      | 2.79  | 5.19  | 1.02 | 0    | 3 |
| IPR022418      | 1.05  | 1.37  | 1.02 | 1    | 3 |
| IPR022414      | 1.89  | 4.62  | 1.01 | 0    | 3 |
| IPR022417      | 1.06  | 1.43  | 1.02 | 1    | 3 |
| IPR022413      | 4.15  | 4.41  | 1    | 0    | 3 |
| IPR021859      | 1.48  | 1.48  | 0    | 0    | 3 |
| IPR021857      | 1.06  | 0     | 1.02 | 1.25 | 3 |
| IPR021850      | 1.32  | 1.32  | 0    | 0    | 3 |
| IPR006389      | 4.25  | 7.5   | 1    | 0    | 3 |
| IPR007475      | 1.01  | 1     | 1.01 | 0    | 3 |
| IPR007472      | 1.1   | 1.39  | 1.01 | 0    | 3 |
| IPR019337      | 1.14  | 1.14  | 0    | 0    | 3 |
| IPR008715      | 1.15  | 1     | 1.15 | 0    | 3 |
| IPR009449      | 1.75  | 1.75  | 0    | 0    | 3 |
| IPR013234      | 1.16  | 1.17  | 1    | 1    | 3 |
| IPR021828      | 1.01  | 0     | 1.01 | 0    | 3 |
| IPR013582      | 1.76  | 2.04  | 1    | 0    | 3 |
| IPR013581      | 25.71 | 25.71 | 0    | 0    | 3 |
| IPR015070      | 1     | 1     | 0    | 0    | 3 |
| IPR001082      | 1.55  | 1     | 1.55 | 0    | 3 |
| IPR008432      | 2.25  | 2.25  | 0    | 0    | 3 |
| IPR008154      | 2.82  | 2.82  | 0    | 0    | 3 |
| IPR015323      | 1.4   | 0     | 1.4  | 0    | 3 |
| IPR005503      | 1.4   | 1     | 1.4  | 0    | 3 |
| IPR011514      | 1.08  | 0     | 1.08 | 0    | 3 |

|                |       |       |      |      |   |
|----------------|-------|-------|------|------|---|
| IPR013919      | 1.2   | 1.2   | 0    | 0    | 3 |
| IPR003786      | 1.23  | 1     | 1.23 | 1.29 | 3 |
| IPR000257      | 1.27  | 1.55  | 1.21 | 2.73 | 3 |
| IPR001787      | 1.05  | 1.51  | 1.02 | 0    | 3 |
| IPR001783      | 2.17  | 2.15  | 2.17 | 2    | 3 |
| IPR022038      | 1.75  | 0     | 1.75 | 0    | 3 |
| IPR022034      | 5     | 5     | 0    | 0    | 3 |
| IPR011491      | 1.27  | 0     | 1.27 | 0    | 3 |
| IPR010540      | 1.69  | 1.14  | 1.8  | 1    | 3 |
| PTHR10333      | 1     | 1     | 0    | 0    | 3 |
| IPR007948      | 2.93  | 0     | 2.93 | 0    | 3 |
| PF11104        | 1.15  | 0     | 1.15 | 0    | 3 |
| IPR012850      | 6.17  | 7.89  | 1    | 0    | 3 |
| IPR020545      | 1.03  | 0     | 1.04 | 1    | 3 |
| PTHR22075      | 1.08  | 1.08  | 0    | 0    | 3 |
| IPR003421      | 1.15  | 1.25  | 1.14 | 0    | 3 |
| IPR013616      | 3.1   | 3.1   | 0    | 0    | 3 |
| PTHR10617:SF7  | 1     | 0     | 1    | 1    | 3 |
| PTHR13182      | 1.49  | 1.49  | 0    | 0    | 3 |
| IPR018463      | 1     | 1     | 0    | 1    | 3 |
| PTHR13723      | 1.25  | 1.25  | 0    | 0    | 3 |
| PF12152        | 1.1   | 1.1   | 0    | 0    | 3 |
| IPR006976      | 1.71  | 1     | 1.78 | 1.22 | 3 |
| IPR010733      | 1.12  | 1.12  | 1    | 0    | 3 |
| IPR020971      | 2.67  | 2.67  | 0    | 0    | 3 |
| PTHR10593:SF10 | 4     | 4     | 0    | 0    | 3 |
| IPR004041      | 30.88 | 30.88 | 0    | 0    | 3 |
| IPR019273      | 1.33  | 1.34  | 1    | 0    | 3 |
| IPR002554      | 3.83  | 3.83  | 0    | 0    | 3 |
| IPR011657      | 1.93  | 1.85  | 1.95 | 0    | 3 |
| IPR011652      | 8.46  | 0     | 8.46 | 0    | 3 |
| IPR009617      | 1.56  | 1.56  | 0    | 0    | 3 |
| PTHR14493      | 1.43  | 1.43  | 0    | 0    | 3 |
| IPR007085      | 1.06  | 1.28  | 1.04 | 1    | 3 |
| IPR007084      | 3.85  | 3.85  | 0    | 0    | 3 |
| IPR004131      | 1.39  | 6.75  | 1.11 | 1.14 | 3 |
| IPR015176      | 1.77  | 6     | 1.42 | 0    | 3 |
| IPR015177      | 1.69  | 5     | 1.42 | 0    | 3 |
| IPR015171      | 1.1   | 0     | 1.1  | 0    | 3 |
| IPR015172      | 1.4   | 1.4   | 0    | 0    | 3 |
| IPR005624      | 1.88  | 1.41  | 1.92 | 1    | 3 |
| IPR018035      | 1.23  | 1     | 1.23 | 0    | 3 |
| IPR013810      | 1.15  | 2.62  | 1.01 | 1    | 3 |
| IPR003119      | 4     | 4     | 0    | 0    | 3 |
| IPR013104      | 1.11  | 0     | 1.11 | 0    | 3 |
| IPR004236      | 2.69  | 0     | 2.69 | 0    | 3 |
| IPR018950      | 1.29  | 0     | 1.29 | 0    | 3 |
| TIGR02778      | 1     | 0     | 1    | 0    | 3 |
| IPR006155      | 1.93  | 1.95  | 1    | 0    | 3 |
| IPR003350      | 5.62  | 5.96  | 1    | 0    | 3 |
| IPR015396      | 1.29  | 1     | 1.29 | 0    | 3 |
| PF09341        | 1.21  | 1.32  | 0    | 1.03 | 3 |
| IPR015393      | 1.17  | 0     | 1.17 | 0    | 3 |
| IPR013340      | 1.81  | 0     | 1    | 1.94 | 3 |
| IPR013690      | 2     | 0     | 2    | 0    | 3 |
| IPR011113      | 1.06  | 0     | 1.06 | 0    | 3 |
| IPR009730      | 1.23  | 1.23  | 0    | 0    | 3 |
| IPR009734      | 1.38  | 1     | 1.39 | 0    | 3 |
| IPR001248      | 2.82  | 5.76  | 2.41 | 1.54 | 3 |
| IPR015039      | 2     | 2     | 0    | 0    | 3 |
| IPR014786      | 1.16  | 1.16  | 0    | 0    | 3 |
| PTHR23224:SF45 | 7.94  | 7.94  | 0    | 0    | 3 |
| IPR019485      | 1.6   | 1.6   | 0    | 0    | 3 |
| IPR021406      | 2.27  | 2.27  | 0    | 0    | 3 |
| IPR022172      | 1.34  | 0     | 1.34 | 0    | 3 |
| IPR006194      | 1     | 0     | 1    | 0    | 3 |
| IPR006442      | 2.69  | 1     | 2.7  | 1    | 3 |
| IPR007310      | 2.18  | 1.43  | 2.21 | 2.5  | 3 |
| IPR000327      | 6.14  | 6.29  | 1    | 0    | 3 |

|                |       |       |      |      |   |
|----------------|-------|-------|------|------|---|
| IPR000320      | 2.04  | 2.04  | 0    | 0    | 3 |
| IPR005317      | 1.42  | 1.56  | 1.08 | 0    | 3 |
| IPR018501      | 1.25  | 1.25  | 0    | 0    | 3 |
| PF12051        | 1.45  | 2.58  | 1.25 | 0    | 3 |
| IPR006839      | 1.04  | 2     | 1.01 | 0    | 3 |
| IPR021614      | 1.33  | 1.33  | 0    | 0    | 3 |
| IPR018746      | 1.74  | 0     | 2.36 | 1.17 | 3 |
| IPR002310      | 1.02  | 1.38  | 1.02 | 0    | 3 |
| IPR002779      | 1.22  | 1.45  | 1.19 | 1.54 | 3 |
| IPR000522      | 4.65  | 1     | 4.84 | 2.24 | 3 |
| IPR009688      | 1.7   | 1.7   | 0    | 0    | 3 |
| IPR005103      | 8.38  | 8.38  | 0    | 0    | 3 |
| IPR011119      | 1.33  | 0     | 1.33 | 0    | 3 |
| PTHR22556      | 1.5   | 1.5   | 0    | 0    | 3 |
| IPR021864      | 12.14 | 12.14 | 0    | 0    | 3 |
| IPR021861      | 1.45  | 1.45  | 0    | 0    | 3 |
| IPR021862      | 1.03  | 1     | 1.04 | 0    | 3 |
| IPR002128      | 1.08  | 2.17  | 1.01 | 0    | 3 |
| PTHR10499:SF65 | 2.93  | 7.5   | 1.27 | 0    | 3 |
| IPR004464      | 1.19  | 1     | 1.19 | 1    | 3 |
| IPR004462      | 1.15  | 0     | 1.1  | 1.44 | 3 |
| IPR000010      | 8.67  | 9.71  | 1.33 | 0    | 3 |
| IPR012600      | 1.4   | 0     | 1.5  | 1    | 3 |
| IPR019186      | 1.11  | 1.11  | 0    | 0    | 3 |
| IPR001059      | 1.21  | 2.1   | 1.19 | 0    | 3 |
| IPR005539      | 11.5  | 11.5  | 0    | 0    | 3 |
| IPR019458      | 1.81  | 1.81  | 0    | 0    | 3 |
| IPR015377      | 1.23  | 1.38  | 1.16 | 0    | 3 |
| PTHR23022:SF9  | 1.96  | 1.71  | 2.02 | 2.5  | 3 |
| IPR006097      | 1.55  | 2.24  | 1.47 | 1.51 | 3 |
| IPR010901      | 1     | 1     | 0    | 0    | 3 |
| IPR005183      | 3.19  | 2     | 3.2  | 0    | 3 |
| IPR014017      | 1     | 0     | 1    | 1    | 3 |
| IPR001464      | 1.67  | 1.75  | 1    | 0    | 3 |
| IPR021715      | 1.17  | 1.17  | 0    | 0    | 3 |
| IPR021719      | 1.15  | 1.05  | 1.18 | 0    | 3 |
| IPR004465      | 1.13  | 0     | 1.13 | 0    | 3 |
| IPR007482      | 1.99  | 1.99  | 0    | 0    | 3 |
| IPR007481      | 1.01  | 1     | 1.01 | 0    | 3 |
| IPR019345      | 1.43  | 1.43  | 0    | 0    | 3 |
| IPR002793      | 1.15  | 0     | 1.03 | 1.5  | 3 |
| PTHR11751      | 1.17  | 1.5   | 1.12 | 0    | 3 |
| IPR006949      | 1.65  | 1     | 1.66 | 1    | 3 |
| IPR006943      | 10.14 | 10.14 | 0    | 0    | 3 |
| IPR006947      | 3     | 3     | 0    | 0    | 3 |
| PTHR12473      | 1.82  | 1.82  | 0    | 0    | 3 |
| IPR020948      | 1.09  | 1     | 1.09 | 1.1  | 3 |
| IPR019109      | 1.44  | 2.12  | 1.12 | 1    | 3 |
| IPR019108      | 1.5   | 0     | 1.5  | 0    | 3 |
| IPR021904      | 1.03  | 0     | 1.03 | 0    | 3 |
| IPR021908      | 1.05  | 0     | 1.05 | 0    | 3 |
| IPR009928      | 1.01  | 0     | 1.01 | 0    | 3 |
| PF07304        | 1.23  | 1.23  | 0    | 0    | 3 |
| IPR005078      | 2.13  | 2.13  | 0    | 0    | 3 |
| IPR008511      | 9.71  | 9.71  | 0    | 0    | 3 |
| IPR008514      | 2.74  | 0     | 2.75 | 1    | 3 |
| IPR008517      | 1.08  | 0     | 1.08 | 0    | 3 |
| IPR006018      | 2.21  | 3.2   | 1.11 | 0    | 3 |
| IPR007760      | 1.43  | 1     | 1.44 | 1    | 3 |
| IPR000472      | 7.03  | 7.03  | 0    | 0    | 3 |
| IPR000755      | 1.08  | 0     | 1.08 | 0    | 3 |
| IPR000281      | 3.29  | 2     | 3.29 | 0    | 3 |
| IPR012493      | 1.52  | 1.52  | 0    | 0    | 3 |
| PTHR23224:SF6  | 1.76  | 1.76  | 0    | 0    | 3 |
| IPR022066      | 1.03  | 0     | 1.03 | 0    | 3 |
| IPR013842      | 1.04  | 1.23  | 1.02 | 0    | 3 |
| IPR013843      | 1.37  | 1.6   | 0    | 1    | 3 |
| IPR013840      | 1.11  | 1     | 1.11 | 1    | 3 |
| IPR013845      | 1.45  | 1.63  | 0    | 1    | 3 |

|                |       |       |      |      |   |
|----------------|-------|-------|------|------|---|
| IPR004264      | 24.33 | 24.33 | 0    | 0    | 3 |
| IPR018906      | 1.01  | 0     | 1.01 | 0    | 3 |
| IPR008584      | 1.35  | 1.35  | 0    | 0    | 3 |
| IPR006602      | 7.83  | 7.83  | 0    | 0    | 3 |
| IPR006609      | 5.47  | 5.47  | 0    | 0    | 3 |
| IPR018969      | 1.17  | 1.41  | 1.14 | 0    | 3 |
| IPR007263      | 1.32  | 2.7   | 1.27 | 1    | 3 |
| PF12219        | 1.17  | 0     | 1.17 | 0    | 3 |
| PF12218        | 1.1   | 1     | 1.2  | 0    | 3 |
| PF12210        | 1.36  | 1.36  | 0    | 0    | 3 |
| IPR011093      | 1.28  | 0     | 1.28 | 0    | 3 |
| PTHR10489      | 1.18  | 1.29  | 1    | 0    | 3 |
| IPR000829      | 1.07  | 1     | 1.07 | 0    | 3 |
| IPR014800      | 4.4   | 4.4   | 0    | 0    | 3 |
| IPR018639      | 1.14  | 1.43  | 1.12 | 2    | 3 |
| IPR007320      | 1.76  | 1.76  | 0    | 0    | 3 |
| IPR007325      | 1.76  | 3.44  | 1.64 | 1.31 | 3 |
| IPR013562      | 1.11  | 1.12  | 1    | 1.38 | 3 |
| PF06382        | 4.79  | 4.79  | 0    | 0    | 3 |
| IPR002696      | 1.07  | 2     | 1.06 | 0    | 3 |
| IPR006868      | 16.5  | 16.5  | 0    | 0    | 3 |
| IPR006866      | 5.17  | 5.17  | 0    | 0    | 3 |
| IPR010481      | 1     | 1     | 0    | 0    | 3 |
| PF09722        | 1.64  | 1     | 1.64 | 0    | 3 |
| PTHR12558:SF11 | 1.11  | 1.2   | 1    | 0    | 3 |
| IPR015237      | 1     | 0     | 1    | 1    | 3 |
| IPR018774      | 1.2   | 1     | 1.2  | 0    | 3 |
| IPR009067      | 1.24  | 1.24  | 0    | 0    | 3 |
| IPR011444      | 8.6   | 0     | 8.6  | 0    | 3 |
| TIGR02795      | 1.03  | 0     | 1.03 | 0    | 3 |
| IPR010317      | 2.23  | 1     | 2.33 | 0    | 3 |
| IPR013923      | 1.33  | 1.33  | 0    | 0    | 3 |
| IPR013922      | 4.1   | 4.22  | 1.33 | 0    | 3 |
| IPR013924      | 1.13  | 1.13  | 0    | 0    | 3 |
| IPR002811      | 1.06  | 1.17  | 1.03 | 1.1  | 3 |
| IPR002810      | 1.31  | 1.5   | 1.31 | 1.3  | 3 |
| IPR003494      | 2.35  | 0     | 2.35 | 0    | 3 |
| IPR019665      | 1.02  | 0     | 1.02 | 1    | 3 |
| IPR000652      | 1.18  | 1.83  | 1.11 | 1.04 | 3 |
| IPR007151      | 1.19  | 1.19  | 0    | 0    | 3 |
| IPR021838      | 5.77  | 6.25  | 1    | 0    | 3 |
| IPR015063      | 2.05  | 2.05  | 0    | 0    | 3 |
| PTHR10333:SF4  | 1.17  | 1.17  | 0    | 0    | 3 |
| IPR014889      | 2.09  | 2.09  | 0    | 0    | 3 |
| IPR004189      | 1.27  | 0     | 1.27 | 0    | 3 |
| IPR004183      | 1.73  | 1.89  | 1.73 | 1.47 | 3 |
| IPR004181      | 3.28  | 3.28  | 0    | 0    | 3 |
| PF11940        | 1.05  | 2     | 1.01 | 1    | 3 |
| IPR001232      | 4.34  | 4.34  | 0    | 0    | 3 |
| IPR003404      | 1.17  | 1.25  | 1    | 0    | 3 |
| IPR022103      | 1.08  | 1.08  | 0    | 0    | 3 |
| IPR022107      | 1.03  | 0     | 1.03 | 0    | 3 |
| IPR022104      | 1     | 0     | 1    | 0    | 3 |
| IPR020992      | 1.02  | 0     | 1.02 | 0    | 3 |
| IPR007349      | 1.48  | 1     | 1.49 | 1    | 3 |
| PTHR11908:SF4  | 1     | 0     | 1    | 0    | 3 |
| IPR019588      | 3     | 3     | 0    | 0    | 3 |
| PF12556        | 1.01  | 0     | 1.01 | 0    | 3 |
| PF12557        | 1.04  | 1     | 1.04 | 0    | 3 |
| IPR019402      | 3.62  | 3.93  | 1    | 0    | 3 |
| IPR019407      | 1.03  | 1.03  | 0    | 0    | 3 |
| PTHR15242      | 1.68  | 1.68  | 0    | 0    | 3 |
| PF04047        | 1.15  | 1.15  | 0    | 0    | 3 |
| IPR015631      | 5.2   | 5.2   | 0    | 0    | 3 |
| IPR021668      | 1.1   | 1.11  | 1    | 0    | 3 |
| PTHR22979      | 1.84  | 1.94  | 1    | 1    | 3 |
| IPR006734      | 13    | 13    | 0    | 0    | 3 |
| IPR015888      | 1.27  | 0     | 1.26 | 1.33 | 3 |
| IPR013731      | 1.56  | 0     | 1.56 | 0    | 3 |

|               |       |       |      |      |   |
|---------------|-------|-------|------|------|---|
| IPR008565     | 1.57  | 0     | 1.57 | 0    | 3 |
| IPR008567     | 2.1   | 1     | 2.12 | 1    | 3 |
| IPR000237     | 2.62  | 2.62  | 0    | 0    | 3 |
| IPR007756     | 1.25  | 0     | 1.27 | 1    | 3 |
| IPR009380     | 1.38  | 0     | 1.39 | 1    | 3 |
| IPR009389     | 1.2   | 1     | 1.21 | 0    | 3 |
| PF12327       | 1.24  | 1     | 1.25 | 1.5  | 3 |
| PTHR11669     | 1.01  | 1.25  | 1    | 0    | 3 |
| PTHR21180:SF4 | 1.03  | 2     | 1    | 1    | 3 |
| IPR001526     | 4.84  | 4.84  | 0    | 0    | 3 |
| PTHR12848:SF5 | 1     | 1     | 0    | 0    | 3 |
| IPR001292     | 2.6   | 2.6   | 0    | 0    | 3 |
| IPR008815     | 2.17  | 0     | 2.17 | 0    | 3 |
| IPR011988     | 1.89  | 1.89  | 0    | 0    | 3 |
| IPR004106     | 1.65  | 2.82  | 1.53 | 1    | 3 |
| IPR007612     | 4.08  | 13.15 | 1.03 | 1.5  | 3 |
| IPR000045     | 1.47  | 1     | 1.5  | 1.11 | 3 |
| IPR000043     | 1.22  | 2.12  | 1.08 | 1    | 3 |
| IPR021397     | 2.25  | 2.25  | 0    | 0    | 3 |
| IPR021394     | 2.33  | 2.33  | 0    | 0    | 3 |
| IPR021977     | 1.85  | 1.85  | 0    | 0    | 3 |
| IPR021976     | 2.93  | 0     | 2.93 | 0    | 3 |
| IPR003929     | 2.6   | 2.6   | 0    | 0    | 3 |
| IPR013978     | 1.79  | 6     | 1.06 | 0    | 3 |
| IPR004320     | 34.43 | 34.43 | 0    | 0    | 3 |
| IPR005043     | 1.38  | 1.38  | 0    | 0    | 3 |
| IPR009607     | 2.4   | 2.4   | 0    | 0    | 3 |
| IPR005182     | 3.58  | 1.5   | 3.71 | 2.63 | 3 |
| IPR020542     | 1.03  | 0     | 1.04 | 1    | 3 |
| PF05873       | 1.39  | 1.39  | 0    | 0    | 3 |
| IPR015802     | 2.47  | 4.49  | 1.27 | 1    | 3 |
| IPR012462     | 1.72  | 1.72  | 0    | 0    | 3 |
| IPR001104     | 3.15  | 3.47  | 1    | 0    | 3 |
| IPR004886     | 4.62  | 4.74  | 1    | 0    | 3 |
| PTHR11915     | 1.2   | 1.25  | 1    | 0    | 3 |
| PTHR11005     | 1.73  | 1.98  | 1.06 | 0    | 3 |
| IPR021744     | 1     | 0     | 1    | 1    | 3 |
| IPR021745     | 1     | 0     | 1    | 0    | 3 |
| IPR005919     | 1.27  | 1.28  | 1    | 0    | 3 |
| IPR007180     | 1.22  | 1.22  | 0    | 0    | 3 |
| IPR007238     | 1.13  | 1.19  | 0    | 1.04 | 3 |
| IPR013677     | 1.11  | 0     | 1.11 | 0    | 3 |
| IPR000170     | 1.53  | 0     | 1.53 | 0    | 3 |
| PTHR10963     | 1.13  | 1.2   | 1    | 2    | 3 |
| IPR003894     | 2.7   | 2.84  | 1    | 0    | 3 |
| IPR006917     | 1.84  | 4.29  | 1    | 1    | 3 |
| IPR010718     | 1.03  | 0     | 1.03 | 1    | 3 |
| IPR010712     | 1.1   | 0     | 1.11 | 1    | 3 |
| IPR010710     | 1.7   | 0     | 1.7  | 1    | 3 |
| IPR010714     | 1.52  | 1.52  | 0    | 0    | 3 |
| IPR000819     | 1.8   | 5.43  | 1.51 | 1    | 3 |
| IPR000818     | 2.45  | 2.48  | 1    | 0    | 3 |
| IPR007365     | 2.8   | 3.06  | 1.33 | 0    | 3 |
| PF08304       | 1.03  | 1.03  | 0    | 0    | 3 |
| PF03896       | 1.55  | 1.55  | 0    | 0    | 3 |
| IPR007887     | 1.31  | 0     | 1.31 | 0    | 3 |
| IPR006429     | 1.64  | 0     | 1.64 | 0    | 3 |
| IPR003619     | 8.87  | 8.87  | 0    | 0    | 3 |
| PF06003       | 1.18  | 1.18  | 0    | 0    | 3 |
| PF12032       | 9.6   | 9.6   | 0    | 0    | 3 |
| IPR020811     | 1.2   | 2.32  | 1.07 | 1.27 | 3 |
| IPR007712     | 2.74  | 0     | 2.75 | 2.56 | 3 |
| IPR007714     | 2.02  | 2.02  | 0    | 0    | 3 |
| IPR007718     | 1.23  | 1.23  | 0    | 0    | 3 |
| IPR001457     | 1.39  | 3.58  | 1.15 | 1.12 | 3 |
| IPR001182     | 2.21  | 1     | 2.21 | 0    | 3 |
| IPR001187     | 12.27 | 13.4  | 1    | 0    | 3 |
| IPR013839     | 1.44  | 0     | 1.44 | 0    | 3 |
| IPR022255     | 3.6   | 3.6   | 0    | 0    | 3 |



|               |       |       |      |      |   |
|---------------|-------|-------|------|------|---|
| IPR004212     | 8.75  | 24.25 | 1    | 0    | 3 |
| IPR008025     | 1.92  | 1.92  | 0    | 0    | 3 |
| IPR018972     | 1.08  | 1.08  | 0    | 0    | 3 |
| IPR018971     | 2.21  | 4.67  | 1.75 | 0    | 3 |
| IPR018976     | 1.48  | 0     | 1.48 | 0    | 3 |
| IPR003335     | 4.04  | 2     | 4.09 | 2.68 | 3 |
| IPR007109     | 4.13  | 5.53  | 1    | 1    | 3 |
| IPR019576     | 1.1   | 1.25  | 1.07 | 0    | 3 |
| IPR015014     | 1.02  | 0     | 1.02 | 0    | 3 |
| IPR006993     | 1.92  | 1.92  | 0    | 0    | 3 |
| IPR010790     | 2.33  | 2.6   | 1    | 0    | 3 |
| IPR010796     | 3.55  | 3.55  | 0    | 0    | 3 |
| IPR010799     | 1.63  | 1     | 1.68 | 1    | 3 |
| IPR003814     | 1.93  | 0     | 1.5  | 3.05 | 3 |
| IPR018222     | 1.46  | 1.46  | 0    | 0    | 3 |
| IPR000895     | 1.28  | 1.39  | 1.25 | 0    | 3 |
| IPR000894     | 2.67  | 6.67  | 2.2  | 0    | 3 |
| IPR012936     | 3     | 3     | 0    | 0    | 3 |
| IPR022156     | 1.06  | 0     | 1.06 | 0    | 3 |
| PF09248       | 1.31  | 1.31  | 0    | 0    | 3 |
| IPR007379     | 1.36  | 1.71  | 1.26 | 0    | 3 |
| IPR001695     | 3.3   | 3.72  | 1.2  | 0    | 3 |
| IPR005335     | 1.37  | 0     | 1.37 | 1    | 3 |
| IPR009719     | 6.43  | 6.43  | 0    | 0    | 3 |
| IPR019290     | 1.18  | 0     | 1.18 | 0    | 3 |
| IPR005593     | 1.25  | 1.41  | 1.23 | 0    | 3 |
| IPR005590     | 1.47  | 0     | 1.47 | 1.5  | 3 |
| IPR013987     | 1.03  | 1     | 1.03 | 0    | 3 |
| IPR013983     | 2.28  | 0     | 2.12 | 2.93 | 3 |
| IPR013982     | 1.09  | 1.35  | 1.07 | 1    | 3 |
| PF10947       | 1.29  | 0     | 1.29 | 0    | 3 |
| TIGR03062     | 1.24  | 0     | 1.24 | 1    | 3 |
| IPR018727     | 1.49  | 0     | 1.51 | 1    | 3 |
| IPR013700     | 2.33  | 2.33  | 0    | 0    | 3 |
| IPR013704     | 1.03  | 1     | 1.03 | 1    | 3 |
| IPR008537     | 1.32  | 2.44  | 1.18 | 1    | 3 |
| PF12372       | 1.89  | 1.89  | 0    | 0    | 3 |
| PTHR23278     | 1.71  | 1.71  | 0    | 0    | 3 |
| IPR021944     | 1.17  | 0     | 1.17 | 0    | 3 |
| TIGR02231     | 1.33  | 2.56  | 1.09 | 0    | 3 |
| IPR020685     | 1.2   | 1.2   | 0    | 0    | 3 |
| IPR015095     | 2.25  | 2.25  | 0    | 0    | 3 |
| IPR021843     | 1.24  | 1.24  | 0    | 0    | 3 |
| IPR009827     | 1.3   | 0     | 1.3  | 0    | 3 |
| IPR016180     | 1.16  | 2.61  | 1.01 | 1    | 3 |
| PTHR22979:SF1 | 5.26  | 6.44  | 1    | 0    | 3 |
| IPR019323     | 3.04  | 3.13  | 1    | 0    | 3 |
| IPR008700     | 18.57 | 18.57 | 0    | 0    | 3 |
| IPR009715     | 1.08  | 0     | 1.08 | 0    | 3 |
| IPR000032     | 2     | 0     | 2    | 0    | 3 |
| IPR013246     | 1.14  | 1.14  | 0    | 0    | 3 |
| IPR008147     | 1.42  | 2.4   | 1.34 | 1.2  | 3 |
| IPR005519     | 1.6   | 11.38 | 1.14 | 1    | 3 |
| IPR006897     | 3.57  | 3.57  | 0    | 0    | 3 |
| IPR006898     | 1.4   | 1.4   | 0    | 0    | 3 |
| IPR010451     | 1.31  | 1.7   | 1.26 | 1.45 | 3 |
| PTHR12749     | 1.18  | 1.6   | 1    | 0    | 3 |
| PTHR23348     | 1.42  | 1     | 1.62 | 0    | 3 |
| IPR000915     | 1.77  | 1.77  | 0    | 0    | 3 |
| IPR000916     | 30.29 | 30.29 | 0    | 0    | 3 |
| IPR013787     | 11.38 | 11.38 | 0    | 0    | 3 |
| IPR012434     | 1.98  | 3     | 1.96 | 0    | 3 |
| PTHR10099     | 1.02  | 1     | 1    | 1.5  | 3 |
| PF12348       | 4.44  | 4.44  | 0    | 0    | 3 |
| IPR021771     | 2.23  | 2.61  | 1    | 0    | 3 |
| PF04350       | 1.15  | 1     | 1.15 | 0    | 3 |
| IPR008023     | 3.48  | 0     | 3.48 | 0    | 3 |
| IPR013081     | 2.35  | 3.25  | 2.14 | 0    | 3 |
| IPR008475     | 4.63  | 0     | 4.63 | 0    | 3 |

|                |       |       |       |      |   |
|----------------|-------|-------|-------|------|---|
| PTHR10420      | 1     | 1     | 0     | 0    | 3 |
| PF11774        | 2.78  | 0     | 2.78  | 0    | 3 |
| PTHR13734      | 1     | 1     | 1     | 0    | 3 |
| PF12147        | 1.01  | 1     | 1.01  | 0    | 3 |
| IPR006968      | 2.2   | 2.2   | 0     | 0    | 3 |
| IPR006966      | 1.23  | 1.23  | 0     | 0    | 3 |
| IPR020964      | 1     | 0     | 1     | 0    | 3 |
| PTHR23083:SF1  | 1.31  | 1.6   | 1.12  | 0    | 3 |
| IPR019127      | 1.29  | 0     | 1.34  | 1.08 | 3 |
| IPR018658      | 1.18  | 1     | 1.17  | 1.33 | 3 |
| IPR007500      | 1.06  | 2     | 1.06  | 0    | 3 |
| IPR002930      | 1.3   | 1.76  | 1.23  | 1.84 | 3 |
| IPR008620      | 1.04  | 0     | 1.04  | 0    | 3 |
| IPR005012      | 1.52  | 1.52  | 0     | 0    | 3 |
| IPR002549      | 2.76  | 1.32  | 2.84  | 2.2  | 3 |
| TIGR01490      | 1.34  | 1     | 1.34  | 0    | 3 |
| IPR011621      | 1.03  | 0     | 1.03  | 0    | 3 |
| IPR011624      | 1.05  | 0     | 1.05  | 0    | 3 |
| PTHR15730      | 1.75  | 3.83  | 1.06  | 0    | 3 |
| IPR005650      | 1.81  | 2     | 1.82  | 1.2  | 3 |
| IPR013867      | 1.39  | 1.39  | 0     | 0    | 3 |
| PTHR12622      | 1     | 1     | 0     | 0    | 3 |
| IPR004245      | 13.52 | 13.52 | 0     | 0    | 3 |
| IPR003339      | 2.21  | 1     | 2.21  | 2.47 | 3 |
| IPR008011      | 5.13  | 5.13  | 0     | 0    | 3 |
| IPR007314      | 1.18  | 2     | 1.12  | 0    | 3 |
| IPR006621      | 13.05 | 13.05 | 0     | 0    | 3 |
| PTHR14453:SF16 | 2     | 2     | 0     | 0    | 3 |
| IPR007281      | 1.26  | 1.26  | 0     | 0    | 3 |
| PTHR14025:SF2  | 1     | 0     | 1     | 0    | 3 |
| IPR012577      | 1.95  | 2.38  | 1.75  | 0    | 3 |
| IPR001272      | 1.14  | 1.85  | 1.06  | 1    | 3 |
| IPR001275      | 5.47  | 5.47  | 0     | 0    | 3 |
| IPR019540      | 1.3   | 1.3   | 0     | 0    | 3 |
| IPR019543      | 2.86  | 2.86  | 0     | 0    | 3 |
| IPR003825      | 1.06  | 1     | 1.06  | 0    | 3 |
| PTHR15182      | 2     | 1     | 3.5   | 0    | 3 |
| IPR012967      | 18.85 | 18.85 | 0     | 0    | 3 |
| IPR012541      | 1.17  | 1.17  | 0     | 0    | 3 |
| PF09922        | 1.37  | 0     | 1.37  | 1    | 3 |
| IPR021435      | 1     | 0     | 1     | 0    | 3 |
| IPR007855      | 3.82  | 3.82  | 0     | 0    | 3 |
| IPR007856      | 1     | 1     | 0     | 0    | 3 |
| IPR006456      | 17.29 | 17.29 | 0     | 0    | 3 |
| IPR000310      | 1.82  | 1.56  | 1.83  | 1    | 3 |
| IPR005094      | 1.61  | 0     | 1.61  | 0    | 3 |
| IPR006840      | 1.37  | 1.77  | 1.2   | 0    | 3 |
| IPR008487      | 11.67 | 0     | 11.67 | 0    | 3 |
| PTHR19418      | 1.64  | 1.64  | 0     | 0    | 3 |
| PTHR22572:SF7  | 1     | 1     | 1     | 1    | 3 |
| IPR019007      | 1.16  | 1.16  | 0     | 0    | 3 |
| IPR010373      | 1.19  | 1     | 1.2   | 0    | 3 |
| IPR010372      | 1.05  | 1     | 1.05  | 0    | 3 |
| IPR000439      | 1.4   | 1.62  | 0     | 1.02 | 3 |
| IPR010991      | 4.42  | 4.42  | 0     | 0    | 3 |
| IPR000898      | 2.42  | 2.58  | 1     | 0    | 3 |
| IPR012931      | 1.5   | 0     | 1.5   | 0    | 3 |
| PTHR23155:SF33 | 4.57  | 5.17  | 1     | 0    | 3 |
| IPR007173      | 1.72  | 2.49  | 1.44  | 0    | 3 |
| IPR015048      | 2.21  | 2.21  | 0     | 0    | 3 |
| IPR015047      | 1.67  | 1.67  | 0     | 0    | 3 |
| IPR015042      | 3.5   | 3.5   | 0     | 0    | 3 |
| IPR021816      | 2.38  | 2.38  | 0     | 0    | 3 |
| IPR005468      | 1.46  | 4.5   | 1.18  | 0    | 3 |
| PTHR10288      | 1     | 1     | 0     | 0    | 3 |
| PTHR10499:SF94 | 1     | 0     | 1     | 0    | 3 |
| IPR004477      | 1.02  | 1     | 1.02  | 0    | 3 |
| PTHR23055      | 1.96  | 2.1   | 1     | 0    | 3 |
| IPR010897      | 1.52  | 0     | 1.52  | 0    | 3 |

|                |       |       |      |      |   |
|----------------|-------|-------|------|------|---|
| IPR000390      | 2.39  | 0     | 2.42 | 1    | 3 |
| IPR000394      | 1.13  | 0     | 1.13 | 0    | 3 |
| IPR018841      | 1.65  | 0     | 1.65 | 0    | 3 |
| IPR015365      | 1.22  | 2.33  | 1.21 | 0    | 3 |
| IPR019465      | 1.1   | 1.1   | 0    | 0    | 3 |
| IPR014909      | 1.27  | 1.88  | 1.17 | 0    | 3 |
| IPR002808      | 1.31  | 0     | 1.49 | 1.07 | 3 |
| PTHR10827      | 2.76  | 2.81  | 1    | 0    | 3 |
| PTHR19242      | 1.24  | 1.44  | 1.17 | 1    | 3 |
| PTHR17598:SF1  | 1     | 0     | 1    | 0    | 3 |
| PTHR22912      | 1     | 1     | 1    | 1    | 3 |
| IPR008547      | 2.83  | 2.87  | 1    | 0    | 3 |
| IPR008546      | 10.12 | 10.12 | 0    | 0    | 3 |
| IPR010635      | 1     | 1     | 1    | 0    | 2 |
| IPR007900      | 1.52  | 1.52  | 0    | 0    | 2 |
| IPR010580      | 1.42  | 1.42  | 0    | 0    | 2 |
| IPR014009      | 1.25  | 1.25  | 0    | 0    | 2 |
| IPR020588      | 1.04  | 1.06  | 1    | 1    | 2 |
| IPR001501      | 2.94  | 0     | 2.76 | 4.45 | 2 |
| IPR021725      | 1     | 0     | 1    | 1    | 2 |
| IPR008832      | 1.18  | 1.18  | 0    | 0    | 2 |
| IPR018143      | 3.88  | 3.88  | 0    | 0    | 2 |
| PTHR19852:SF8  | 5     | 8     | 1    | 0    | 2 |
| PTHR21079      | 1.33  | 1.33  | 0    | 0    | 2 |
| PTHR22683:SF30 | 1.05  | 1.07  | 1    | 0    | 2 |
| IPR015655      | 1     | 1     | 1    | 0    | 2 |
| IPR014051      | 1.88  | 2     | 1.87 | 2    | 2 |
| IPR003691      | 1.51  | 2.31  | 1.46 | 1.52 | 2 |
| IPR003695      | 1.51  | 1.43  | 1.53 | 1    | 2 |
| PTHR12506:SF8  | 1.4   | 1.4   | 0    | 0    | 2 |
| IPR001338      | 4.36  | 4.36  | 0    | 0    | 2 |
| IPR019176      | 1.41  | 1.41  | 0    | 0    | 2 |
| IPR021911      | 2     | 2     | 0    | 0    | 2 |
| IPR009244      | 1.06  | 1.06  | 0    | 0    | 2 |
| IPR005549      | 1.21  | 1.21  | 0    | 0    | 2 |
| IPR013953      | 1.24  | 1.24  | 0    | 0    | 2 |
| IPR014981      | 1.78  | 0     | 1.78 | 0    | 2 |
| IPR016582      | 1.02  | 1     | 1.02 | 0    | 2 |
| IPR002905      | 1.24  | 1.46  | 1    | 1    | 2 |
| PF04641        | 1.93  | 1.93  | 0    | 0    | 2 |
| IPR004082      | 9     | 9     | 0    | 0    | 2 |
| PTHR23323:SF24 | 1.1   | 1.1   | 0    | 0    | 2 |
| IPR008656      | 3.19  | 3.19  | 0    | 0    | 2 |
| IPR004333      | 18.25 | 18.25 | 0    | 0    | 2 |
| IPR005063      | 6.96  | 1     | 7.24 | 3.75 | 2 |
| IPR005336      | 2.84  | 2.84  | 0    | 0    | 2 |
| PTHR23315      | 1.4   | 1.4   | 0    | 0    | 2 |
| IPR011618      | 1.25  | 0     | 1.25 | 0    | 2 |
| IPR003605      | 4.72  | 4.72  | 0    | 0    | 2 |
| IPR007770      | 13.57 | 13.57 | 0    | 0    | 2 |
| IPR007774      | 1.04  | 0     | 1.04 | 0    | 2 |
| IPR000293      | 1.3   | 2     | 1.22 | 0    | 2 |
| IPR021039      | 1.05  | 1.4   | 1    | 0    | 2 |
| PF12430        | 1.31  | 1.31  | 0    | 0    | 2 |
| IPR005660      | 1.81  | 1     | 1.81 | 2.75 | 2 |
| IPR015285      | 1.06  | 1.09  | 1    | 1    | 2 |
| IPR015135      | 1.5   | 1.5   | 0    | 0    | 2 |
| IPR015136      | 1.5   | 1.5   | 0    | 0    | 2 |
| IPR015137      | 1.5   | 1.5   | 0    | 0    | 2 |
| IPR022077      | 1     | 0     | 1    | 0    | 2 |
| IPR022075      | 1.43  | 1.43  | 0    | 0    | 2 |
| IPR022074      | 1.23  | 0     | 1.23 | 0    | 2 |
| IPR006816      | 2.82  | 2.82  | 0    | 0    | 2 |
| IPR007981      | 3.18  | 0     | 0    | 3.18 | 2 |
| IPR013855      | 1.32  | 1.32  | 0    | 0    | 2 |
| PF11144        | 2.15  | 1     | 2.25 | 0    | 2 |
| PTHR12616      | 1     | 1     | 0    | 0    | 2 |
| PF11856        | 1.18  | 0     | 1.18 | 0    | 2 |
| IPR018911      | 1.1   | 0     | 1.1  | 0    | 2 |

|                 |      |      |      |      |   |
|-----------------|------|------|------|------|---|
| TIGR03462       | 1.98 | 1    | 1.94 | 2.23 | 2 |
| PTHR23124       | 5.25 | 9.5  | 1    | 0    | 2 |
| IPR005037       | 1.66 | 1.66 | 0    | 0    | 2 |
| PTHR21568       | 1.18 | 1.19 | 0    | 1    | 2 |
| IPR013653       | 1.89 | 4.74 | 1.33 | 1    | 2 |
| IPR008427       | 5.07 | 5.07 | 0    | 0    | 2 |
| IPR008429       | 1.8  | 1.8  | 0    | 0    | 2 |
| PTHR12891       | 1.17 | 1.17 | 0    | 0    | 2 |
| IPR016866       | 1.42 | 1    | 1.43 | 0    | 2 |
| IPR019513       | 1.4  | 1.67 | 1    | 1    | 2 |
| IPR006933       | 1.96 | 1.96 | 0    | 0    | 2 |
| IPR000831       | 1.04 | 0    | 1.05 | 1    | 2 |
| IPR019604       | 1.3  | 0    | 1.3  | 0    | 2 |
| PTHR21483       | 1.6  | 1.6  | 0    | 0    | 2 |
| IPR015411       | 1.23 | 1.23 | 0    | 0    | 2 |
| IPR018628       | 1.1  | 1.1  | 0    | 0    | 2 |
| IPR021994       | 1.45 | 4    | 1.42 | 1.5  | 2 |
| IPR021996       | 2    | 2    | 0    | 0    | 2 |
| IPR021990       | 1.48 | 1.48 | 0    | 0    | 2 |
| IPR006691       | 7.85 | 6.62 | 7.9  | 6    | 2 |
| PTHR21737       | 1    | 1    | 0    | 0    | 2 |
| PTHR11524       | 1.73 | 1.73 | 0    | 0    | 2 |
| IPR000587       | 1.99 | 2.33 | 1.97 | 1.62 | 2 |
| IPR010821       | 1.58 | 3.75 | 1.22 | 1    | 2 |
| IPR010828       | 1.72 | 1.9  | 1    | 1    | 2 |
| IPR001983       | 1.53 | 1.53 | 0    | 0    | 2 |
| IPR001985       | 1.57 | 1.74 | 1    | 0    | 2 |
| IPR001677       | 2.41 | 0    | 2.41 | 0    | 2 |
| IPR004007       | 1.65 | 1.5  | 1.67 | 1    | 2 |
| PTHR19852       | 1.25 | 1.4  | 1    | 0    | 2 |
| IPR005359       | 1    | 1    | 1    | 0    | 2 |
| PTHR21136       | 1.83 | 1.83 | 0    | 0    | 2 |
| IPR019525       | 1.86 | 1.86 | 0    | 0    | 2 |
| PTHR10483       | 3.58 | 3.64 | 1    | 0    | 2 |
| IPR018782       | 1.43 | 1.43 | 0    | 0    | 2 |
| PTHR17614       | 1.09 | 1.09 | 0    | 0    | 2 |
| PTHR10046       | 1.41 | 1    | 1.44 | 0    | 2 |
| IPR022383       | 1.83 | 5.68 | 1.37 | 1.17 | 2 |
| PTHR19818:SF9   | 1.15 | 1.15 | 0    | 0    | 2 |
| IPR010328       | 4.15 | 0    | 4.15 | 0    | 2 |
| IPR002829       | 1.15 | 0    | 1.09 | 1.26 | 2 |
| IPR002825       | 1.16 | 0    | 1.18 | 1.1  | 2 |
| IPR012897       | 1.6  | 1.6  | 0    | 0    | 2 |
| PTHR19264       | 1.6  | 1.6  | 0    | 0    | 2 |
| PTHR19269       | 1.09 | 1.1  | 1    | 0    | 2 |
| IPR013148       | 1.36 | 1.14 | 1.44 | 0    | 2 |
| IPR013143       | 4.45 | 4.45 | 0    | 0    | 2 |
| IPR008590       | 2.24 | 2.24 | 0    | 0    | 2 |
| IPR008594       | 1.15 | 1.15 | 0    | 0    | 2 |
| IPR008595       | 1.05 | 0    | 1.05 | 0    | 2 |
| IPR008599       | 1.12 | 0    | 1.12 | 0    | 2 |
| IPR005141       | 2.2  | 2.48 | 1    | 1.91 | 2 |
| IPR005145       | 1.03 | 1.05 | 1.03 | 1    | 2 |
| IPR003315       | 1.72 | 1.72 | 0    | 0    | 2 |
| PTHR19446:SF10C | 6.72 | 6.72 | 0    | 0    | 2 |
| IPR008201       | 1.97 | 0    | 1.87 | 2.94 | 2 |
| PTHR12380:SF8   | 1    | 1    | 0    | 0    | 2 |
| IPR019594       | 2.6  | 2.6  | 0    | 0    | 2 |
| IPR021821       | 1.56 | 0    | 1.56 | 0    | 2 |
| IPR021827       | 1.75 | 1.75 | 0    | 0    | 2 |
| IPR007003       | 1    | 0    | 1    | 1    | 2 |
| IPR007002       | 1.15 | 0    | 1.15 | 0    | 2 |
| IPR007001       | 1.45 | 0    | 1.45 | 0    | 2 |
| IPR012916       | 1.22 | 1.22 | 0    | 0    | 2 |
| IPR020391       | 1    | 0    | 1    | 1    | 2 |
| PTHR21404       | 1.06 | 1.13 | 1    | 0    | 2 |
| PTHR11939:SF35  | 1    | 0    | 1    | 0    | 2 |
| IPR002843       | 1.26 | 1.41 | 1.12 | 1.15 | 2 |
| IPR018003       | 1.14 | 0    | 1.14 | 0    | 2 |

|                 |       |       |      |      |   |
|-----------------|-------|-------|------|------|---|
| IPR007684       | 1.49  | 0     | 1.49 | 0    | 2 |
| IPR007681       | 1.12  | 1.12  | 0    | 0    | 2 |
| PTHR23229:SF13  | 1.56  | 1.56  | 0    | 0    | 2 |
| PTHR23224:SF45; | 1     | 1     | 0    | 0    | 2 |
| PTHR23224:SF45; | 1.5   | 1.5   | 0    | 0    | 2 |
| IPR013512       | 1.04  | 1.2   | 1.03 | 0    | 2 |
| IPR021322       | 2     | 0     | 2    | 0    | 2 |
| IPR004623       | 1.12  | 2     | 1.11 | 1.25 | 2 |
| IPR012642       | 4.83  | 4.83  | 0    | 0    | 2 |
| IPR001019       | 7.74  | 7.74  | 0    | 0    | 2 |
| PF12544         | 1.2   | 0     | 1.21 | 1    | 2 |
| IPR002668       | 1.91  | 1.75  | 1.94 | 0    | 2 |
| IPR009679       | 1.12  | 0     | 1.12 | 0    | 2 |
| PTHR12725       | 1.28  | 2     | 1    | 0    | 2 |
| TIGR01640       | 15.17 | 15.17 | 0    | 0    | 2 |
| TIGR03083       | 2.11  | 0     | 2.11 | 0    | 2 |
| IPR021654       | 2.83  | 2.83  | 0    | 0    | 2 |
| IPR000976       | 2.67  | 2.67  | 0    | 0    | 2 |
| IPR006720       | 1.73  | 1.73  | 0    | 0    | 2 |
| IPR006722       | 2.15  | 2.15  | 0    | 0    | 2 |
| PF04271         | 1.09  | 0     | 1.09 | 0    | 2 |
| IPR003773       | 1.09  | 0     | 1.1  | 1    | 2 |
| IPR001731       | 1.09  | 1.29  | 1.07 | 1    | 2 |
| IPR015896       | 1.06  | 2.22  | 1.04 | 1.06 | 2 |
| IPR015895       | 1.07  | 2.33  | 1.05 | 1.08 | 2 |
| IPR015766       | 2.67  | 3.5   | 1    | 0    | 2 |
| PF12357         | 14.43 | 14.43 | 0    | 0    | 2 |
| PF12352         | 1.97  | 1.97  | 0    | 0    | 2 |
| PTHR10887:SF10  | 1.36  | 1.36  | 0    | 0    | 2 |
| IPR015408       | 1.13  | 1.13  | 0    | 0    | 2 |
| IPR013890       | 1.16  | 1.16  | 0    | 0    | 2 |
| IPR001539       | 2.39  | 2     | 2.4  | 2.13 | 2 |
| IPR001534       | 16.2  | 26.33 | 1    | 0    | 2 |
| PF08215         | 1.17  | 1.17  | 0    | 0    | 2 |
| IPR001282       | 2.85  | 4.57  | 2.64 | 0    | 2 |
| PF11103         | 6.4   | 0     | 6.4  | 0    | 2 |
| PTHR10725       | 2     | 2     | 0    | 0    | 2 |
| TIGR01251       | 1.22  | 1.12  | 2    | 0    | 2 |
| IPR009849       | 22.6  | 0     | 22.6 | 0    | 2 |
| IPR007443       | 1.03  | 0     | 1.03 | 1    | 2 |
| IPR004137       | 1.6   | 2     | 1.57 | 1.91 | 2 |
| IPR004139       | 2.23  | 2.26  | 1    | 0    | 2 |
| IPR019306       | 1.24  | 1.24  | 0    | 0    | 2 |
| IPR008722       | 1.11  | 1     | 1.12 | 0    | 2 |
| PF11799         | 1.14  | 1     | 1.15 | 0    | 2 |
| PF11796         | 1     | 0     | 1    | 0    | 2 |
| IPR002995       | 1.67  | 1.7   | 1.25 | 0    | 2 |
| PTHR11952:SF2   | 1.67  | 1.67  | 0    | 0    | 2 |
| IPR007604       | 2.44  | 2.44  | 0    | 0    | 2 |
| IPR013225       | 1.26  | 0     | 1.24 | 1.67 | 2 |
| IPR013593       | 1.83  | 1.83  | 0    | 0    | 2 |
| IPR015933       | 1.33  | 0     | 1.33 | 0    | 2 |
| IPR019145       | 1.17  | 1.17  | 0    | 0    | 2 |
| IPR018810       | 2.03  | 2.03  | 0    | 0    | 2 |
| IPR021948       | 1     | 0     | 1    | 0    | 2 |
| IPR019491       | 1.21  | 1     | 1.23 | 1    | 2 |
| IPR011520       | 1.62  | 1.62  | 0    | 0    | 2 |
| PTHR11227       | 1.56  | 1.56  | 0    | 0    | 2 |
| IPR009938       | 3.75  | 3.75  | 0    | 0    | 2 |
| PTHR11219       | 1.57  | 1     | 1.67 | 0    | 2 |
| IPR000597       | 1.17  | 2.74  | 1.02 | 1    | 2 |
| IPR004301       | 2.7   | 2.7   | 0    | 0    | 2 |
| IPR006052       | 6.29  | 7.48  | 1    | 0    | 2 |
| PF09091         | 1.25  | 1.25  | 0    | 0    | 2 |
| IPR010941       | 1.63  | 1     | 1.65 | 1    | 2 |
| PTHR21148:SF11  | 1.1   | 1.1   | 0    | 0    | 2 |
| IPR015814       | 1.17  | 1     | 1.2  | 1    | 2 |
| IPR001114       | 1.13  | 1.4   | 1.11 | 1.02 | 2 |
| PF12460         | 1.11  | 1.11  | 0    | 0    | 2 |

|                |       |       |      |      |   |
|----------------|-------|-------|------|------|---|
| IPR022025      | 2.1   | 3.5   | 1.75 | 0    | 2 |
| IPR004896      | 1.93  | 2     | 1.92 | 0    | 2 |
| PTHR11921      | 1.17  | 1.51  | 1.11 | 1    | 2 |
| IPR015104      | 2     | 2     | 0    | 0    | 2 |
| IPR002499      | 10.92 | 10.92 | 0    | 0    | 2 |
| IPR011488      | 1.13  | 1.21  | 0    | 1    | 2 |
| IPR010575      | 1     | 0     | 1    | 0    | 2 |
| IPR010579      | 95    | 95    | 0    | 0    | 2 |
| IPR010684      | 1.23  | 1.23  | 0    | 0    | 2 |
| IPR010686      | 1.45  | 1.88  | 1.07 | 0    | 2 |
| IPR010683      | 7.5   | 7.5   | 0    | 0    | 2 |
| PTHR10342      | 1     | 1     | 1    | 0    | 2 |
| IPR007972      | 2.83  | 3     | 1    | 0    | 2 |
| IPR013882      | 1.15  | 1.15  | 0    | 0    | 2 |
| IPR013881      | 1.37  | 1.37  | 0    | 0    | 2 |
| IPR012868      | 1.03  | 0     | 1.03 | 0    | 2 |
| IPR011680      | 1.71  | 1.71  | 0    | 0    | 2 |
| IPR006862      | 2.69  | 7     | 1.11 | 1    | 2 |
| IPR022220      | 1     | 0     | 1    | 0    | 2 |
| IPR022229      | 1.3   | 1.3   | 0    | 0    | 2 |
| IPR004338      | 1.55  | 0     | 1.55 | 1    | 2 |
| IPR004335      | 2.75  | 0     | 2.75 | 0    | 2 |
| IPR008862      | 2.28  | 2.28  | 0    | 0    | 2 |
| IPR008868      | 1.29  | 1     | 1.3  | 0    | 2 |
| IPR006572      | 1.13  | 1.13  | 0    | 0    | 2 |
| IPR007196      | 1.76  | 1.76  | 0    | 0    | 2 |
| IPR007223      | 1.08  | 1.08  | 0    | 0    | 2 |
| IPR013600      | 11.64 | 11.64 | 0    | 0    | 2 |
| IPR008417      | 2.04  | 2.06  | 1    | 0    | 2 |
| IPR019380      | 1.43  | 1.43  | 0    | 0    | 2 |
| IPR021256      | 2.33  | 0     | 2.33 | 0    | 2 |
| IPR021848      | 2.12  | 3.68  | 1.15 | 0    | 2 |
| IPR018473      | 1.43  | 1.43  | 0    | 0    | 2 |
| IPR021844      | 1.21  | 0     | 1.21 | 0    | 2 |
| IPR010723      | 1.71  | 1.33  | 1.71 | 0    | 2 |
| IPR013550      | 2     | 0     | 2    | 0    | 2 |
| IPR021494      | 1     | 0     | 1    | 0    | 2 |
| PTHR11552      | 1.14  | 1.25  | 1    | 0    | 2 |
| PTHR11550      | 1     | 1     | 1    | 0    | 2 |
| IPR009961      | 6.4   | 6.4   | 0    | 0    | 2 |
| IPR010258      | 2.16  | 1     | 2.17 | 0    | 2 |
| IPR000559      | 1.12  | 1.42  | 1.06 | 1    | 2 |
| IPR010879      | 1.81  | 0     | 1.71 | 4.8  | 2 |
| PTHR12145      | 1.1   | 1     | 1.2  | 1    | 2 |
| PTHR12143      | 1     | 0     | 1    | 0    | 2 |
| IPR019261      | 1.64  | 2.12  | 1.1  | 0    | 2 |
| IPR004927      | 1.18  | 1     | 1.19 | 1    | 2 |
| IPR004926      | 5.86  | 6.67  | 1    | 0    | 2 |
| TIGR01470      | 1.01  | 1     | 1.01 | 1    | 2 |
| PTHR23233:SF13 | 1.25  | 1.25  | 0    | 0    | 2 |
| IPR020821      | 1.59  | 1.86  | 1.12 | 0    | 2 |
| IPR000718      | 3.6   | 3.6   | 0    | 0    | 2 |
| TIGR02816      | 1.25  | 0     | 1.25 | 0    | 2 |
| IPR000710      | 1.82  | 0     | 1.82 | 0    | 2 |
| IPR021040      | 11.2  | 11.2  | 0    | 0    | 2 |
| IPR015182      | 1.18  | 0     | 1.18 | 0    | 2 |
| IPR015184      | 1.17  | 0     | 1.17 | 0    | 2 |
| IPR005635      | 1.21  | 1.21  | 0    | 0    | 2 |
| IPR005632      | 1.26  | 2     | 1.26 | 0    | 2 |
| IPR003102      | 2.69  | 2.69  | 0    | 0    | 2 |
| IPR013116      | 1.09  | 1.41  | 1.07 | 1.21 | 2 |
| IPR004220      | 1.16  | 1     | 1.16 | 0    | 2 |
| IPR018947      | 1.43  | 1.43  | 0    | 0    | 2 |
| IPR005172      | 6.68  | 6.68  | 0    | 0    | 2 |
| PF11339        | 1.47  | 1     | 1.48 | 0    | 2 |
| PTHR22620      | 2     | 2     | 0    | 0    | 2 |
| TIGR00402      | 1.03  | 0     | 1.03 | 0    | 2 |
| IPR003345      | 3.4   | 0     | 3.4  | 0    | 2 |
| IPR006643      | 4.23  | 4.23  | 0    | 0    | 2 |

|                 |       |       |       |      |   |
|-----------------|-------|-------|-------|------|---|
| IPR007112       | 1.4   | 1.4   | 0     | 0    | 2 |
| IPR012556       | 1.46  | 0     | 1.46  | 0    | 2 |
| IPR002759       | 1.31  | 1.49  | 0     | 1    | 2 |
| PD038969        | 1     | 0     | 0     | 1    | 2 |
| IPR006988       | 1.56  | 1.56  | 0     | 0    | 2 |
| IPR006986       | 1.83  | 1.83  | 0     | 0    | 2 |
| PF02750         | 2.33  | 2.38  | 1     | 0    | 2 |
| IPR021416       | 1.14  | 0     | 1.14  | 0    | 2 |
| IPR022143       | 10.83 | 10.83 | 0     | 0    | 2 |
| PTHR21478       | 1.2   | 1.2   | 0     | 0    | 2 |
| IPR007836       | 1.19  | 1.19  | 0     | 1    | 2 |
| IPR007300       | 1.43  | 1.54  | 1.43  | 1    | 2 |
| IPR013524       | 4.85  | 4.85  | 0     | 0    | 2 |
| IPR008688       | 1.23  | 1.24  | 1     | 0    | 2 |
| IPR005308       | 2.12  | 1     | 2.14  | 1    | 2 |
| IPR018533       | 2.04  | 2.04  | 0     | 0    | 2 |
| PF12592         | 1.02  | 0     | 1.02  | 0    | 2 |
| IPR002650       | 1.26  | 1.7   | 1.08  | 1    | 2 |
| IPR002652       | 2.93  | 2.93  | 0     | 0    | 2 |
| PTHR17204       | 1     | 1     | 0     | 0    | 2 |
| PTHR15201       | 1.07  | 1.07  | 0     | 0    | 2 |
| IPR021625       | 1.72  | 1.72  | 0     | 0    | 2 |
| IPR005850       | 1.13  | 1.22  | 1.11  | 1    | 2 |
| IPR002852       | 1.23  | 0     | 1.26  | 1.16 | 2 |
| IPR003187       | 1.05  | 1     | 1.05  | 0    | 2 |
| IPR016017       | 7.52  | 7.52  | 0     | 0    | 2 |
| IPR013198       | 1.02  | 0     | 1.02  | 0    | 2 |
| IPR001769       | 1.33  | 0     | 1.36  | 1    | 2 |
| IPR009349       | 1.17  | 1.17  | 1     | 1    | 2 |
| PF11629         | 1.44  | 1.44  | 0     | 0    | 2 |
| PF11620         | 1.29  | 1.29  | 0     | 0    | 2 |
| IPR011126       | 1.01  | 1     | 1.01  | 0    | 2 |
| PTHR23246       | 16.93 | 19.58 | 1     | 1    | 2 |
| IPR010654       | 1.93  | 1     | 1.94  | 0    | 2 |
| IPR019130       | 1.7   | 1.7   | 0     | 0    | 2 |
| IPR001568       | 1.43  | 2.46  | 1.02  | 0    | 2 |
| IPR021780       | 3     | 3     | 0     | 0    | 2 |
| IPR021785       | 1.44  | 1.44  | 0     | 0    | 2 |
| IPR021786       | 1.19  | 1.19  | 0     | 0    | 2 |
| IPR021876       | 1     | 1     | 0     | 0    | 2 |
| IPR021872       | 1     | 0     | 1     | 0    | 2 |
| IPR021870       | 2     | 2     | 0     | 0    | 2 |
| IPR021878       | 1.01  | 0     | 1.01  | 1    | 2 |
| IPR014779       | 11.48 | 1     | 11.57 | 0    | 2 |
| IPR007410       | 1.25  | 1     | 1.26  | 1    | 2 |
| PTHR12380       | 1.3   | 1.3   | 0     | 0    | 2 |
| PF04237         | 1.4   | 0     | 1.4   | 0    | 2 |
| TIGR02594       | 1.18  | 0     | 1.18  | 0    | 2 |
| PTHR23224:SF466 | 1     | 1     | 0     | 0    | 2 |
| IPR006123       | 12.83 | 0     | 12.83 | 0    | 2 |
| IPR007657       | 4.41  | 4.52  | 1     | 0    | 2 |
| IPR007654       | 1.2   | 1.2   | 0     | 0    | 2 |
| IPR003578       | 8.18  | 8.18  | 0     | 0    | 2 |
| IPR013258       | 1.53  | 1.53  | 0     | 0    | 2 |
| IPR012613       | 1     | 1     | 1     | 0    | 2 |
| PTHR13366       | 1.5   | 1.5   | 0     | 0    | 2 |
| IPR019197       | 1.32  | 1.71  | 1     | 0    | 2 |
| IPR019190       | 1.17  | 1.17  | 0     | 1    | 2 |
| IPR018825       | 1.83  | 1.83  | 0     | 0    | 2 |
| IPR018820       | 1.6   | 1.6   | 0     | 0    | 2 |
| IPR005526       | 1.06  | 1     | 1.06  | 0    | 2 |
| IPR005528       | 6     | 1     | 7.25  | 0    | 2 |
| IPR015349       | 1.02  | 1.3   | 1.01  | 0    | 2 |
| PTHR11850       | 1.17  | 1.17  | 0     | 0    | 2 |
| PTHR10066:SF9   | 1     | 1     | 0     | 0    | 2 |
| IPR013930       | 1.14  | 1.14  | 0     | 0    | 2 |
| IPR013935       | 1.21  | 1.21  | 0     | 0    | 2 |
| PTHR14738       | 1.07  | 1.07  | 0     | 0    | 2 |
| IPR004353       | 1.35  | 1.35  | 0     | 0    | 2 |

|                |       |       |      |      |   |
|----------------|-------|-------|------|------|---|
| PF10662        | 1.5   | 1     | 1.51 | 0    | 2 |
| IPR003038      | 1.14  | 1.14  | 0    | 0    | 2 |
| IPR021095      | 1.67  | 0     | 1.67 | 0    | 2 |
| IPR021096      | 1.67  | 0     | 1.67 | 0    | 2 |
| IPR004595      | 1.12  | 1.12  | 0    | 0    | 2 |
| IPR021548      | 1.2   | 1     | 1.21 | 0    | 2 |
| IPR012429      | 1.38  | 3.62  | 1.27 | 1.31 | 2 |
| IPR007922      | 1.03  | 0     | 1.03 | 0    | 2 |
| IPR007926      | 1.06  | 1.33  | 1    | 0    | 2 |
| IPR021881      | 7.29  | 7.29  | 0    | 0    | 2 |
| IPR008856      | 1.47  | 1.5   | 0    | 1    | 2 |
| IPR015679      | 1     | 1     | 1    | 0    | 2 |
| PF06276        | 1.14  | 1.4   | 1.13 | 0    | 2 |
| TIGR01488      | 1     | 0     | 1    | 0    | 2 |
| IPR006955      | 1.05  | 1.05  | 0    | 1    | 2 |
| IPR002842      | 1.28  | 1.51  | 1.08 | 1.07 | 2 |
| PTHR11246:SF1  | 1.25  | 1.25  | 0    | 0    | 2 |
| IPR019569      | 3.62  | 3.62  | 0    | 0    | 2 |
| IPR021834      | 1.01  | 0     | 1.01 | 1    | 2 |
| IPR012128      | 8.17  | 0     | 8.17 | 0    | 2 |
| IPR019564      | 1.75  | 1.76  | 1    | 0    | 2 |
| IPR021935      | 1.33  | 1.33  | 0    | 0    | 2 |
| IPR021934      | 3     | 3     | 0    | 0    | 2 |
| PTHR10185      | 1.25  | 0     | 1.25 | 0    | 2 |
| IPR002072      | 3.43  | 3.62  | 1    | 0    | 2 |
| IPR007514      | 1.09  | 1.09  | 0    | 0    | 2 |
| IPR007511      | 1.04  | 1.5   | 1.01 | 0    | 2 |
| PF02363        | 46.22 | 46.22 | 0    | 0    | 2 |
| IPR019251      | 1.46  | 1     | 1.47 | 0    | 2 |
| IPR005255      | 1.25  | 1     | 1.25 | 1    | 2 |
| PF11538        | 1.18  | 1.18  | 0    | 0    | 2 |
| PTHR10083:SF14 | 1     | 1     | 1    | 0    | 2 |
| IPR007750      | 15    | 15    | 0    | 0    | 2 |
| IPR000768      | 2.35  | 4.44  | 1.24 | 0    | 2 |
| PTHR21576:SF2  | 1     | 1     | 0    | 0    | 2 |
| IPR001144      | 1.67  | 1     | 1.75 | 0    | 2 |
| PTHR10492      | 5.33  | 5.33  | 0    | 0    | 2 |
| IPR015156      | 1     | 0     | 0    | 1    | 2 |
| IPR015152      | 5.92  | 5.92  | 0    | 0    | 2 |
| PTHR17204:SF9  | 1     | 1     | 0    | 0    | 2 |
| IPR013874      | 1.34  | 1.34  | 0    | 0    | 2 |
| IPR013873      | 1.29  | 1.29  | 0    | 0    | 2 |
| IPR013872      | 2.88  | 2.88  | 0    | 0    | 2 |
| IPR013878      | 1.82  | 1.82  | 0    | 0    | 2 |
| IPR013124      | 1.89  | 1.89  | 0    | 0    | 2 |
| PF10586        | 1.77  | 1.77  | 0    | 0    | 2 |
| PTHR19304:SF4  | 1.22  | 1.22  | 0    | 0    | 2 |
| PTHR21541      | 1.15  | 1.15  | 0    | 0    | 2 |
| IPR003377      | 1.99  | 1.99  | 0    | 0    | 2 |
| IPR007274      | 3.63  | 3.67  | 1    | 0    | 2 |
| IPR007271      | 3.63  | 3.67  | 1    | 0    | 2 |
| IPR000136      | 11.38 | 12.86 | 1    | 0    | 2 |
| IPR012506      | 1.13  | 1.32  | 1.09 | 0    | 2 |
| PF12203        | 5.5   | 5.5   | 0    | 0    | 2 |
| IPR011087      | 5.2   | 0     | 5.2  | 0    | 2 |
| IPR019539      | 1.21  | 1.75  | 1.09 | 1    | 2 |
| PTHR10366:SF9  | 5.56  | 7.83  | 1    | 0    | 2 |
| IPR002180      | 1.13  | 1.08  | 1.09 | 1.71 | 2 |
| PF05119        | 1.38  | 2     | 1.38 | 0    | 2 |
| IPR017454      | 1.33  | 1.33  | 0    | 0    | 2 |
| IPR014816      | 1.13  | 1.32  | 1.05 | 1    | 2 |
| IPR012973      | 1.25  | 1.25  | 0    | 0    | 2 |
| IPR012977      | 1.12  | 1.12  | 0    | 0    | 2 |
| IPR015284      | 1     | 1     | 0    | 0    | 2 |
| IPR021424      | 1.45  | 0     | 1.43 | 2    | 2 |
| IPR022192      | 1.2   | 1.27  | 1.04 | 0    | 2 |
| IPR007598      | 6.75  | 6.75  | 0    | 0    | 2 |
| IPR007594      | 1.11  | 1.11  | 0    | 0    | 2 |
| IPR007593      | 2.95  | 7.2   | 1.58 | 0    | 2 |



|                |        |        |      |      |   |
|----------------|--------|--------|------|------|---|
| IPR010809      | 1.19   | 1      | 1.19 | 0    | 2 |
| IPR010800      | 3.91   | 4.92   | 1    | 0    | 2 |
| IPR003652      | 2.8    | 2.8    | 0    | 0    | 2 |
| IPR013579      | 3.18   | 3.18   | 0    | 0    | 2 |
| IPR004686      | 2.18   | 2.18   | 0    | 0    | 2 |
| IPR018568      | 1.6    | 1      | 1.67 | 0    | 2 |
| IPR009500      | 2.86   | 2.86   | 0    | 0    | 2 |
| PTHR19446:SF97 | 17.5   | 17.5   | 0    | 0    | 2 |
| TIGR01427      | 1.09   | 0      | 1.09 | 0    | 2 |
| PTHR14167      | 1      | 1      | 0    | 0    | 2 |
| PTHR20936      | 1.21   | 1.21   | 0    | 0    | 2 |
| IPR019010      | 1.38   | 1.38   | 0    | 0    | 2 |
| IPR019019      | 1.5    | 2.71   | 1    | 0    | 2 |
| IPR018763      | 1.33   | 0      | 1.35 | 1    | 2 |
| IPR015228      | 1      | 1      | 0    | 0    | 2 |
| IPR009073      | 1.04   | 1.08   | 1.03 | 0    | 2 |
| IPR010305      | 2.37   | 0      | 2.37 | 0    | 2 |
| IPR002800      | 1.03   | 2      | 1.02 | 1    | 2 |
| IPR002804      | 1.06   | 1.22   | 1.03 | 1    | 2 |
| IPR000407      | 3.9    | 4.04   | 1.8  | 0    | 2 |
| PTHR19241      | 1.8    | 2      | 1    | 0    | 2 |
| PF12613        | 1.21   | 0      | 1.21 | 0    | 2 |
| PF12615        | 1.46   | 0      | 1.46 | 0    | 2 |
| IPR005120      | 1.48   | 1.48   | 0    | 0    | 2 |
| PF10508        | 1.64   | 1.64   | 0    | 0    | 2 |
| PTHR12902      | 1.94   | 2.1    | 1    | 0    | 2 |
| PF03825        | 1.66   | 1.93   | 1.63 | 0    | 2 |
| IPR000643      | 3.31   | 3.64   | 1.5  | 0    | 2 |
| IPR000647      | 8.62   | 8.62   | 0    | 0    | 2 |
| IPR007146      | 2.65   | 2.65   | 0    | 0    | 2 |
| IPR001593      | 1.46   | 1.73   | 0    | 1    | 2 |
| PF06500        | 1.13   | 1.46   | 1.08 | 1.33 | 2 |
| IPR012588      | 1.25   | 1.26   | 1    | 0    | 2 |
| IPR012580      | 1.93   | 1.93   | 0    | 0    | 2 |
| IPR012587      | 6      | 6      | 0    | 0    | 2 |
| IPR015059      | 1      | 0      | 1    | 0    | 2 |
| IPR015054      | 2.33   | 2.33   | 0    | 0    | 2 |
| IPR003854      | 14.14  | 14.14  | 0    | 0    | 2 |
| IPR003850      | 1.02   | 0      | 1.02 | 1    | 2 |
| IPR014890      | 2.87   | 2.87   | 0    | 0    | 2 |
| IPR014896      | 2.53   | 2.53   | 0    | 0    | 2 |
| PTHR23139:SF9  | 1.25   | 1.25   | 0    | 0    | 2 |
| IPR004191      | 1.46   | 2.33   | 1.2  | 0    | 2 |
| PTHR10953:SF4  | 1.29   | 1.5    | 1    | 0    | 2 |
| TIGR01007      | 1.5    | 0      | 1.5  | 0    | 2 |
| IPR001975      | 1.32   | 1.45   | 0    | 1.03 | 2 |
| IPR006179      | 1      | 1      | 1    | 1    | 2 |
| IPR010889      | 1      | 1      | 1    | 0    | 2 |
| IPR001389      | 104.67 | 104.67 | 0    | 0    | 2 |
| IPR001383      | 1.08   | 1.19   | 1.07 | 0    | 2 |
| PTHR10827:SF13 | 1.24   | 1.25   | 1    | 0    | 2 |
| IPR010412      | 1.1    | 0      | 1.1  | 0    | 2 |
| IPR010414      | 1.28   | 1.28   | 1    | 0    | 2 |
| IPR014915      | 1.14   | 1      | 1.14 | 0    | 2 |
| IPR001982      | 3.39   | 7.14   | 1    | 1    | 2 |
| PF05909        | 1.18   | 1.18   | 0    | 0    | 2 |
| PTHR12706      | 1.9    | 2.04   | 1.78 | 0    | 2 |
| IPR010400      | 2.04   | 2.04   | 0    | 0    | 2 |
| IPR000959      | 3.53   | 3.53   | 0    | 0    | 2 |
| PF06027        | 2.33   | 2.33   | 0    | 0    | 2 |
| IPR007072      | 1.14   | 1.43   | 1.12 | 1    | 2 |
| IPR007077      | 1.1    | 1      | 1.1  | 1    | 2 |
| IPR000484      | 3.08   | 5.8    | 2.66 | 0    | 2 |
| IPR013746      | 1.32   | 1.72   | 1.1  | 1    | 2 |
| IPR008571      | 1.05   | 0      | 1.06 | 1    | 2 |
| IPR012290      | 3.5    | 3.5    | 0    | 0    | 2 |
| IPR000221      | 1.33   | 1.33   | 0    | 0    | 2 |
| IPR021538      | 1      | 1      | 0    | 0    | 2 |
| PF03535        | 2      | 2.14   | 1    | 0    | 2 |

|                 |       |       |      |   |   |
|-----------------|-------|-------|------|---|---|
| IPR008399       | 2.8   | 2.8   | 0    | 0 | 2 |
| PF12330         | 1.27  | 1.27  | 0    | 0 | 2 |
| IPR010628       | 1.08  | 1     | 1.08 | 0 | 2 |
| IPR010622       | 3.17  | 3.17  | 0    | 0 | 2 |
| PTHR14919       | 1     | 1     | 0    | 0 | 2 |
| IPR015500       | 1.15  | 1.29  | 1    | 0 | 2 |
| IPR008806       | 1.28  | 1.28  | 0    | 0 | 2 |
| IPR008807       | 3.73  | 1     | 3.83 | 1 | 2 |
| IPR018156       | 1.32  | 1.38  | 1    | 0 | 2 |
| PTHR11472       | 1     | 0     | 1    | 0 | 2 |
| IPR011996       | 3.2   | 3.2   | 0    | 0 | 2 |
| PTHR23224:SF10  | 1.22  | 1.22  | 0    | 0 | 2 |
| IPR007296       | 1.54  | 1     | 1.55 | 1 | 2 |
| IPR012318       | 2.19  | 1     | 2.19 | 0 | 2 |
| IPR017894       | 1.34  | 0     | 1.35 | 1 | 2 |
| PTHR13384:SF1   | 1.19  | 1.19  | 0    | 0 | 2 |
| IPR004111       | 2.95  | 0     | 2.95 | 0 | 2 |
| IPR019362       | 2.07  | 2.36  | 1    | 0 | 2 |
| IPR002222       | 1.13  | 2.27  | 1.01 | 1 | 2 |
| TIGR01557       | 2.43  | 2.43  | 0    | 0 | 2 |
| PTHR15140       | 1.34  | 1.34  | 0    | 0 | 2 |
| IPR021384       | 1.18  | 1.18  | 0    | 0 | 2 |
| IPR019167       | 1.84  | 1.84  | 0    | 0 | 2 |
| IPR019165       | 1.07  | 1.07  | 0    | 0 | 2 |
| PD486863        | 1.02  | 0     | 1.03 | 1 | 2 |
| IPR019163       | 1.23  | 1.23  | 0    | 0 | 2 |
| IPR015315       | 1.35  | 3.25  | 1.27 | 0 | 2 |
| PTHR10663       | 1.5   | 1.5   | 0    | 0 | 2 |
| PTHR10661       | 1     | 1     | 0    | 0 | 2 |
| IPR009271       | 28.33 | 28.33 | 0    | 0 | 2 |
| IPR003458       | 3.29  | 0     | 3.29 | 0 | 2 |
| IPR013947       | 1.15  | 1.15  | 0    | 0 | 2 |
| IPR007543       | 1.03  | 1     | 1.04 | 0 | 2 |
| IPR000533       | 5.83  | 6.64  | 1    | 1 | 2 |
| IPR004098       | 1.23  | 1.23  | 0    | 0 | 2 |
| IPR008669       | 1.28  | 1.28  | 0    | 0 | 2 |
| IPR004323       | 1.07  | 1.45  | 1.03 | 1 | 2 |
| IPR004322       | 1.13  | 0     | 1.13 | 0 | 2 |
| IPR008664       | 3.5   | 3.5   | 0    | 0 | 2 |
| IPR005052       | 2.67  | 2.67  | 0    | 0 | 2 |
| IPR002745       | 1.15  | 1.23  | 1.11 | 1 | 2 |
| PF11563         | 1     | 0     | 1    | 1 | 2 |
| PTHR22908:SF4   | 1     | 1     | 0    | 0 | 2 |
| IPR006031       | 2.8   | 2.8   | 0    | 0 | 2 |
| IPR007780       | 1.15  | 1.06  | 1.16 | 0 | 2 |
| IPR015878       | 1     | 1     | 1    | 0 | 2 |
| IPR015877       | 1.12  | 1.12  | 0    | 0 | 2 |
| IPR021024       | 1.1   | 1.1   | 0    | 0 | 2 |
| IPR021027       | 1.26  | 0     | 1.32 | 1 | 2 |
| IPR012479       | 1.16  | 1.16  | 0    | 0 | 2 |
| IPR012472       | 1.93  | 1.93  | 0    | 0 | 2 |
| PF12445         | 1     | 0     | 1    | 0 | 2 |
| IPR005204       | 8.94  | 8.94  | 0    | 0 | 2 |
| IPR022042       | 1.42  | 1.42  | 0    | 0 | 2 |
| IPR015128       | 2.2   | 2.2   | 0    | 0 | 2 |
| IPR015120       | 1.27  | 1.27  | 0    | 0 | 2 |
| IPR010516       | 1.21  | 1.21  | 0    | 0 | 2 |
| IPR010512       | 8.71  | 8.71  | 0    | 0 | 2 |
| PTHR11905       | 1.25  | 1.33  | 1    | 0 | 2 |
| PTHR10366       | 1.24  | 1.91  | 1.12 | 0 | 2 |
| PF05827         | 1.78  | 1.78  | 0    | 0 | 2 |
| PF01305         | 1     | 1     | 1    | 0 | 2 |
| PF01306         | 1.76  | 1.5   | 1.78 | 0 | 2 |
| PF07466         | 1.74  | 4.18  | 1.15 | 0 | 2 |
| PF07464         | 1.43  | 1.6   | 1    | 1 | 2 |
| PTHR12596       | 1.77  | 1.77  | 0    | 0 | 2 |
| PTHR23258:SF43C | 3.83  | 3.83  | 0    | 0 | 2 |
| PTHR21512       | 1     | 1     | 0    | 0 | 2 |
| IPR005900       | 1.11  | 1.45  | 1.01 | 0 | 2 |

|                |      |      |      |      |   |
|----------------|------|------|------|------|---|
| IPR015203      | 1    | 0    | 1    | 0    | 2 |
| IPR003416      | 1.59 | 1.5  | 1.6  | 1.3  | 2 |
| IPR007249      | 1.21 | 1.21 | 0    | 0    | 2 |
| IPR000146      | 1.27 | 2.16 | 1.11 | 1    | 2 |
| IPR021270      | 1    | 0    | 1    | 0    | 2 |
| IPR012533      | 1.13 | 1    | 1.13 | 0    | 2 |
| PTHR10617:SF9  | 1.4  | 1.67 | 1    | 1    | 2 |
| IPR015621      | 2    | 2    | 0    | 0    | 2 |
| IPR019501      | 1.28 | 1    | 1.29 | 0    | 2 |
| IPR002736      | 1.32 | 1    | 1.4  | 1    | 2 |
| IPR008907      | 1.94 | 1.94 | 0    | 0    | 2 |
| PTHR22143      | 1.33 | 1.33 | 0    | 0    | 2 |
| PTHR21497      | 1.29 | 1.29 | 0    | 0    | 2 |
| IPR018618      | 1.61 | 1.61 | 0    | 0    | 2 |
| IPR018619      | 1.81 | 1.81 | 0    | 0    | 2 |
| IPR015395      | 2.72 | 2.72 | 0    | 0    | 2 |
| PTHR21726      | 5.57 | 5.57 | 0    | 0    | 2 |
| IPR010275      | 1.13 | 1    | 1.13 | 0    | 2 |
| IPR006419      | 1.24 | 1    | 1.24 | 0    | 2 |
| IPR010856      | 1.1  | 1.31 | 1.01 | 0    | 2 |
| IPR001996      | 1.21 | 0    | 1.21 | 0    | 2 |
| IPR001991      | 2.97 | 3.97 | 2.93 | 1.27 | 2 |
| IPR001662      | 1.7  | 1.7  | 0    | 0    | 2 |
| IPR015985      | 1.1  | 1    | 1.1  | 1    | 2 |
| IPR018553      | 1.67 | 1.67 | 0    | 0    | 2 |
| TIGR01456      | 1.86 | 1.86 | 0    | 0    | 2 |
| IPR013732      | 4.57 | 4.57 | 0    | 0    | 2 |
| PTHR15904      | 1.71 | 1.71 | 0    | 0    | 2 |
| PTHR12596:SF2  | 1.68 | 1.68 | 0    | 0    | 2 |
| TIGR02163      | 1.08 | 0    | 1.08 | 0    | 2 |
| PF06176        | 1.09 | 1.67 | 1.05 | 0    | 2 |
| IPR007708      | 1.12 | 1.12 | 0    | 0    | 2 |
| IPR000731      | 1.55 | 1    | 1.67 | 0    | 2 |
| IPR015211      | 1.44 | 1.53 | 1.28 | 0    | 2 |
| IPR015213      | 1.09 | 0    | 1.09 | 0    | 2 |
| IPR015216      | 1.93 | 1.93 | 0    | 0    | 2 |
| IPR018793      | 1.14 | 1.14 | 0    | 0    | 2 |
| IPR005614      | 2.28 | 1    | 2.33 | 1.72 | 2 |
| IPR005612      | 2.93 | 2.93 | 0    | 0    | 2 |
| IPR005619      | 1.01 | 0    | 1.01 | 0    | 2 |
| PTHR10050      | 1.56 | 10   | 1    | 0    | 2 |
| IPR013821      | 3.95 | 3.95 | 0    | 0    | 2 |
| IPR003127      | 5.5  | 5.5  | 0    | 0    | 2 |
| IPR010339      | 1.93 | 1.93 | 0    | 0    | 2 |
| IPR002834      | 1    | 0    | 1    | 1    | 2 |
| IPR013177      | 1.1  | 1.18 | 1.02 | 0    | 2 |
| IPR012889      | 1.07 | 0    | 1.07 | 1    | 2 |
| IPR012888      | 1.05 | 0    | 1.05 | 0    | 2 |
| IPR000479      | 8.26 | 8.26 | 0    | 0    | 2 |
| IPR004207      | 1.25 | 2    | 1    | 0    | 2 |
| IPR005152      | 2.32 | 2.33 | 2.31 | 0    | 2 |
| PTHR11014      | 1    | 1    | 1    | 0    | 2 |
| PTHR13063      | 1    | 1    | 0    | 0    | 2 |
| IPR018962      | 1.95 | 5.67 | 1    | 0    | 2 |
| PTHR22642      | 1.16 | 1.44 | 1.13 | 1    | 2 |
| TIGR02283      | 1.11 | 1    | 1.11 | 0    | 2 |
| TIGR02282      | 1.03 | 0    | 1.03 | 0    | 2 |
| IPR003327      | 1.56 | 1.56 | 0    | 0    | 2 |
| IPR007134      | 1.09 | 1.09 | 0    | 0    | 2 |
| IPR020639      | 1.2  | 1.38 | 1    | 0    | 2 |
| IPR021149      | 1.42 | 1.42 | 0    | 1    | 2 |
| IPR001236      | 1.82 | 5.54 | 1.38 | 1.17 | 2 |
| IPR010787      | 1.06 | 0    | 1.06 | 0    | 2 |
| IPR000888      | 1.35 | 1.5  | 1.36 | 1.19 | 2 |
| IPR012920      | 1.1  | 1.1  | 0    | 0    | 2 |
| PF11965        | 1.57 | 2    | 1.52 | 0    | 2 |
| PF05205        | 1.13 | 1.13 | 0    | 0    | 2 |
| PF05206        | 1.27 | 1.32 | 1    | 0    | 2 |
| PTHR22572:SF17 | 1.05 | 1    | 1.04 | 1.2  | 2 |

|                |       |       |       |      |   |
|----------------|-------|-------|-------|------|---|
| IPR022123      | 1.11  | 0     | 1.11  | 0    | 2 |
| IPR022122      | 2.54  | 2.54  | 0     | 0    | 2 |
| PTHR10742:SF33 | 1     | 0     | 1     | 1    | 2 |
| IPR007811      | 1.32  | 1.32  | 0     | 0    | 2 |
| IPR006497      | 1.85  | 0     | 1.85  | 0    | 2 |
| IPR018826      | 1.33  | 1.33  | 0     | 0    | 2 |
| PTHR10032:SF67 | 1.69  | 1.69  | 0     | 0    | 2 |
| IPR007361      | 1.82  | 1.45  | 1.88  | 1    | 2 |
| IPR007369      | 1.29  | 1.29  | 0     | 0    | 2 |
| IPR013500      | 1.16  | 1.39  | 1.04  | 1    | 2 |
| IPR015344      | 2.5   | 0     | 2.5   | 0    | 2 |
| IPR018882      | 1.83  | 1.83  | 0     | 0    | 2 |
| IPR005324      | 1.16  | 2.78  | 1.01  | 1    | 2 |
| IPR005322      | 1.8   | 2.42  | 1.76  | 1    | 2 |
| IPR005329      | 3.86  | 3.86  | 0     | 0    | 2 |
| IPR015904      | 1     | 1     | 1     | 1    | 2 |
| IPR019283      | 1.19  | 0     | 1.19  | 0    | 2 |
| IPR004981      | 1.19  | 1.33  | 1.16  | 0    | 2 |
| IPR001001      | 1.15  | 2     | 1.15  | 0    | 2 |
| IPR000090      | 1.21  | 0     | 1.21  | 0    | 2 |
| IPR002677      | 1.06  | 1.31  | 1.04  | 0    | 2 |
| IPR010424      | 1.1   | 1.14  | 1.1   | 1    | 2 |
| PTHR10161      | 1.09  | 1.14  | 1     | 0    | 2 |
| PTHR10166      | 1.27  | 1.38  | 1     | 0    | 2 |
| IPR014944      | 1.79  | 0     | 1.79  | 0    | 2 |
| PTHR23110      | 1.5   | 1.5   | 0     | 0    | 2 |
| PF11029        | 1.25  | 1.25  | 0     | 0    | 2 |
| PTHR20963      | 1     | 1     | 1     | 0    | 2 |
| IPR020193      | 1.04  | 0     | 1.04  | 0    | 2 |
| IPR021646      | 2     | 2     | 0     | 0    | 2 |
| IPR021640      | 2     | 2     | 0     | 0    | 2 |
| TIGR02322      | 1     | 0     | 1     | 0    | 2 |
| PTHR21601      | 1.08  | 1.08  | 0     | 0    | 2 |
| IPR000969      | 1.23  | 1.23  | 0     | 0    | 2 |
| IPR003192      | 2.17  | 0     | 2.17  | 0    | 2 |
| PF07798        | 2.15  | 2.3   | 1.44  | 0    | 2 |
| IPR008509      | 2.12  | 2.12  | 0     | 0    | 2 |
| IPR004861      | 2.19  | 3.29  | 1.03  | 0    | 2 |
| PTHR12958      | 2.36  | 2.36  | 0     | 0    | 2 |
| PTHR15032      | 1     | 1     | 1     | 0    | 2 |
| IPR021858      | 6.14  | 6.14  | 0     | 0    | 2 |
| IPR007471      | 1.08  | 1.33  | 1.01  | 0    | 2 |
| IPR004126      | 1.67  | 1.67  | 0     | 0    | 2 |
| IPR019335      | 1.34  | 1.34  | 0     | 0    | 2 |
| IPR008719      | 1.5   | 0     | 1.45  | 2.5  | 2 |
| PTHR22766      | 1     | 1     | 0     | 0    | 2 |
| IPR007679      | 12.43 | 12.43 | 0     | 0    | 2 |
| IPR013238      | 1.13  | 1.13  | 0     | 0    | 2 |
| IPR013586      | 1.93  | 1.93  | 0     | 0    | 2 |
| IPR013585      | 4.86  | 4.86  | 0     | 0    | 2 |
| IPR013589      | 2.11  | 0     | 2.11  | 1    | 2 |
| PF12533        | 4.33  | 4.33  | 0     | 0    | 2 |
| IPR018808      | 1.53  | 1.53  | 0     | 0    | 2 |
| IPR015320      | 1.05  | 1.29  | 1     | 1.02 | 2 |
| IPR005506      | 10.43 | 0     | 10.43 | 0    | 2 |
| IPR013918      | 1.22  | 1.22  | 0     | 0    | 2 |
| IPR013914      | 1     | 1     | 0     | 0    | 2 |
| PTHR13806      | 1     | 1     | 1     | 0    | 2 |
| IPR004378      | 6.9   | 0     | 7.14  | 1    | 2 |
| PF02030        | 1     | 0     | 1     | 0    | 2 |
| PF10644        | 1.19  | 1.19  | 0     | 0    | 2 |
| TIGR02634      | 1.17  | 0     | 1.17  | 0    | 2 |
| IPR007009      | 1.11  | 1.11  | 0     | 0    | 2 |
| IPR000781      | 1.75  | 1.75  | 0     | 0    | 2 |
| IPR009678      | 1.15  | 1     | 1.15  | 0    | 2 |
| IPR009677      | 1.6   | 0     | 1.6   | 0    | 2 |
| IPR021565      | 1.24  | 1.24  | 0     | 0    | 2 |
| IPR022032      | 2.75  | 2.75  | 0     | 0    | 2 |
| PTHR13681      | 1.25  | 1.25  | 0     | 0    | 2 |

|                |       |       |      |      |   |
|----------------|-------|-------|------|------|---|
| IPR010543      | 3.67  | 3.67  | 0    | 0    | 2 |
| IPR010544      | 5.25  | 5.71  | 2    | 0    | 2 |
| IPR013896      | 1.03  | 1.03  | 0    | 0    | 2 |
| IPR013892      | 1.78  | 1.78  | 0    | 0    | 2 |
| IPR012856      | 1     | 1     | 1    | 0    | 2 |
| IPR012857      | 1     | 1     | 1    | 0    | 2 |
| IPR021764      | 1.27  | 0     | 1.27 | 0    | 2 |
| IPR022232      | 1.08  | 1.08  | 0    | 0    | 2 |
| IPR006561      | 2.79  | 2.79  | 0    | 0    | 2 |
| IPR003422      | 1.39  | 1.39  | 0    | 0    | 2 |
| IPR003428      | 2.04  | 2.04  | 0    | 0    | 2 |
| IPR007218      | 1.37  | 1.37  | 0    | 0    | 2 |
| IPR007216      | 1.68  | 1.68  | 0    | 0    | 2 |
| IPR021243      | 1.14  | 1.5   | 1.13 | 0    | 2 |
| IPR020978      | 3.14  | 3.14  | 0    | 0    | 2 |
| PTHR12558:SF9  | 1.12  | 1.14  | 1    | 0    | 2 |
| PF08320        | 1.09  | 1.09  | 0    | 0    | 2 |
| IPR019134      | 1.23  | 1.23  | 0    | 0    | 2 |
| IPR019136      | 1.38  | 1.38  | 0    | 0    | 2 |
| IPR019137      | 2.03  | 2.03  | 0    | 0    | 2 |
| IPR018667      | 1.05  | 0     | 1.05 | 0    | 2 |
| IPR005659      | 1.2   | 1     | 1.22 | 1    | 2 |
| PTHR15722:SF7  | 2     | 2     | 0    | 0    | 2 |
| PTHR15722:SF2  | 1.25  | 1.25  | 0    | 0    | 2 |
| IPR002056      | 1.73  | 1.73  | 0    | 0    | 2 |
| IPR007537      | 1.3   | 1.43  | 1    | 1    | 2 |
| PF04681        | 2.18  | 2.18  | 0    | 0    | 2 |
| IPR003191      | 5.71  | 5.71  | 0    | 0    | 2 |
| PF03424        | 1.33  | 0     | 1.33 | 0    | 2 |
| PTHR19818      | 1     | 1     | 0    | 0    | 2 |
| IPR008610      | 1.11  | 1.11  | 0    | 0    | 2 |
| IPR008614      | 1.78  | 1.82  | 1    | 0    | 2 |
| PTHR21636:SF1  | 1     | 1     | 0    | 0    | 2 |
| IPR005021      | 1.56  | 1     | 1.57 | 0    | 2 |
| IPR009610      | 1.86  | 0     | 1.86 | 0    | 2 |
| IPR009614      | 1.35  | 0     | 1.35 | 0    | 2 |
| PTHR15722      | 1.25  | 1.25  | 0    | 0    | 2 |
| PTHR21174      | 1     | 1     | 1    | 0    | 2 |
| IPR022017      | 1.63  | 2.86  | 1.26 | 0    | 2 |
| IPR000704      | 3.32  | 3.32  | 0    | 0    | 2 |
| IPR000701      | 1.88  | 1.68  | 1.91 | 1.85 | 2 |
| IPR015178      | 1     | 0     | 1    | 1    | 2 |
| IPR015179      | 1     | 0     | 1    | 1    | 2 |
| IPR015174      | 1.37  | 1.37  | 0    | 0    | 2 |
| PTHR10000      | 1.06  | 1     | 1.06 | 1    | 2 |
| IPR011419      | 1.09  | 1.15  | 1.03 | 0    | 2 |
| IPR011418      | 1.29  | 0     | 1.29 | 1    | 2 |
| IPR006745      | 1.67  | 1.67  | 0    | 0    | 2 |
| PTHR11061      | 1     | 1     | 1    | 0    | 2 |
| IPR004238      | 5.89  | 9.9   | 1.44 | 0    | 2 |
| IPR018952      | 12.1  | 12.1  | 0    | 0    | 2 |
| PTHR23258:SF46 | 2.71  | 3     | 1    | 0    | 2 |
| PF11897        | 1.11  | 0     | 1.11 | 1.17 | 2 |
| IPR008000      | 1.21  | 1     | 1.23 | 0    | 2 |
| IPR008007      | 1.83  | 0     | 1.87 | 1.46 | 2 |
| PTHR21497:SF1  | 1.29  | 1.29  | 0    | 0    | 2 |
| IPR015394      | 2.81  | 4.22  | 1    | 0    | 2 |
| IPR007295      | 1.38  | 0     | 1.42 | 1.12 | 2 |
| IPR007298      | 1.05  | 1     | 1.05 | 0    | 2 |
| IPR000118      | 13.19 | 13.19 | 0    | 0    | 2 |
| PTHR10907      | 1     | 0     | 1    | 1    | 2 |
| IPR015035      | 1.5   | 0     | 1.5  | 0    | 2 |
| IPR015036      | 2     | 2     | 0    | 0    | 2 |
| IPR003836      | 1.19  | 3     | 1.16 | 0    | 2 |
| IPR003835      | 1.06  | 1.83  | 1.05 | 0    | 2 |
| IPR014781      | 3     | 0     | 3    | 0    | 2 |
| IPR014870      | 1.97  | 2.24  | 1.4  | 0    | 2 |
| IPR012956      | 3.71  | 3.71  | 0    | 0    | 2 |
| IPR012953      | 1.17  | 1.17  | 0    | 0    | 2 |

|                |       |       |       |      |   |
|----------------|-------|-------|-------|------|---|
| TIGR01765      | 2.5   | 0     | 2.65  | 1.75 | 2 |
| TIGR01766      | 2.85  | 0     | 3.07  | 1    | 2 |
| IPR022171      | 24.12 | 0     | 24.12 | 0    | 2 |
| IPR007823      | 1.12  | 1.12  | 0     | 0    | 2 |
| IPR007311      | 1.63  | 1.87  | 1     | 0    | 2 |
| IPR008698      | 1.13  | 1.13  | 0     | 0    | 2 |
| PF03651        | 1.06  | 1.06  | 0     | 0    | 2 |
| IPR018504      | 1.43  | 0     | 1.43  | 0    | 2 |
| IPR006837      | 1.05  | 0     | 1.05  | 0    | 2 |
| IPR019414      | 1.05  | 1.05  | 0     | 0    | 2 |
| PTHR23224:SF21 | 1.5   | 1.5   | 0     | 0    | 2 |
| IPR004018      | 8.24  | 8.24  | 0     | 0    | 2 |
| IPR015248      | 1.25  | 1.25  | 0     | 0    | 2 |
| IPR015246      | 1.37  | 0     | 1.37  | 0    | 2 |
| IPR015243      | 1.71  | 0     | 1.71  | 0    | 2 |
| IPR002311      | 1.02  | 1.12  | 1.02  | 0    | 2 |
| TIGR03483      | 1     | 0     | 1     | 0    | 2 |
| IPR010369      | 8.14  | 8.14  | 0     | 0    | 2 |
| PF09054        | 1.19  | 0     | 1.17  | 1.33 | 2 |
| IPR006762      | 2.33  | 2.38  | 1     | 0    | 2 |
| IPR000420      | 15.56 | 15.56 | 0     | 0    | 2 |
| IPR013180      | 1.21  | 1.21  | 0     | 0    | 2 |
| IPR000527      | 1.17  | 1     | 1.17  | 0    | 2 |
| IPR005104      | 1.01  | 1     | 1     | 1.05 | 2 |
| IPR004907      | 1.22  | 1.22  | 0     | 0    | 2 |
| IPR010645      | 1.07  | 0     | 1.07  | 0    | 2 |
| IPR004311      | 10.25 | 0     | 10.25 | 0    | 2 |
| PTHR23155:SF25 | 1.25  | 1.25  | 0     | 0    | 2 |
| IPR000196      | 1.34  | 1.56  | 0     | 1    | 2 |
| IPR000193      | 1.1   | 1.38  | 1.09  | 1    | 2 |
| IPR021138      | 1.42  | 1.62  | 0     | 1    | 2 |
| IPR007404      | 1.57  | 0     | 1.49  | 2.27 | 2 |
| PTHR22550      | 1.19  | 4     | 1     | 0    | 2 |
| IPR019626      | 3.31  | 4.45  | 3.19  | 0    | 2 |
| IPR008769      | 1.3   | 0     | 1.3   | 0    | 2 |
| IPR008766      | 1.4   | 1     | 1.41  | 0    | 2 |
| PTHR13824:SF29 | 1.59  | 1.59  | 0     | 0    | 2 |
| IPR001854      | 1.06  | 1.52  | 1.01  | 1    | 2 |
| IPR003543      | 2     | 2     | 0     | 0    | 2 |
| IPR007393      | 1.01  | 1     | 1.01  | 0    | 2 |
| IPR000013      | 1.33  | 0     | 1.33  | 0    | 2 |
| IPR001948      | 1.52  | 2.18  | 1.26  | 0    | 2 |
| IPR012606      | 1.23  | 1.37  | 0     | 1    | 2 |
| IPR012572      | 1.25  | 1.25  | 0     | 0    | 2 |
| PF12500        | 1     | 0     | 1     | 0    | 2 |
| IPR018857      | 1.17  | 1.17  | 0     | 0    | 2 |
| IPR005530      | 1.9   | 0     | 1.9   | 0    | 2 |
| IPR005537      | 3.98  | 0     | 3.88  | 4.35 | 2 |
| IPR015373      | 11.45 | 12.5  | 1     | 0    | 2 |
| IPR019451      | 1.2   | 1.2   | 0     | 0    | 2 |
| IPR019450      | 1.02  | 1.18  | 1     | 0    | 2 |
| IPR018588      | 1.15  | 0     | 1.15  | 0    | 2 |
| IPR003973      | 1.71  | 1.71  | 0     | 0    | 2 |
| IPR014936      | 1.85  | 1.85  | 0     | 0    | 2 |
| PF05920        | 1.45  | 1.45  | 0     | 0    | 2 |
| PTHR10529:SF6  | 8.67  | 12.5  | 1     | 0    | 2 |
| PTHR12187      | 1.17  | 1.17  | 0     | 0    | 2 |
| IPR004347      | 1.97  | 0     | 1.97  | 0    | 2 |
| IPR006099      | 2.14  | 1.5   | 2.23  | 1.24 | 2 |
| PTHR19991      | 1.71  | 1.71  | 0     | 0    | 2 |
| IPR008551      | 1.21  | 1.66  | 1.04  | 1    | 2 |
| PF06495        | 1.85  | 1.85  | 0     | 0    | 2 |
| PTHR13712:SF8  | 1     | 1     | 1     | 0    | 2 |
| IPR012416      | 16.38 | 16.38 | 0     | 0    | 2 |
| IPR009606      | 20.43 | 20.43 | 0     | 0    | 2 |
| IPR009604      | 1.33  | 1.33  | 0     | 0    | 2 |
| IPR005189      | 2.24  | 2.24  | 0     | 0    | 2 |
| PF12529        | 1.57  | 1.57  | 0     | 0    | 2 |
| PTHR14027      | 1     | 1     | 1     | 0    | 2 |

|                 |       |       |      |      |   |
|-----------------|-------|-------|------|------|---|
| IPR014013       | 1     | 1     | 1    | 1    | 2 |
| IPR018705       | 1.37  | 1     | 1.38 | 0    | 2 |
| IPR018709       | 1.95  | 0     | 1.96 | 1.5  | 2 |
| IPR007931       | 11.67 | 11.67 | 0    | 0    | 2 |
| IPR001465       | 1.28  | 1.26  | 1.3  | 1    | 2 |
| IPR007792       | 1.63  | 0     | 1.63 | 0    | 2 |
| IPR009886       | 5.31  | 5.42  | 1    | 0    | 2 |
| IPR010003       | 1.19  | 1.19  | 0    | 0    | 2 |
| IPR007489       | 1.17  | 0     | 1.17 | 0    | 2 |
| IPR003475       | 7.92  | 7.92  | 0    | 0    | 2 |
| IPR019344       | 1.71  | 1.71  | 0    | 0    | 2 |
| IPR002798       | 1.21  | 1     | 1.19 | 1.29 | 2 |
| IPR013659       | 4.45  | 4.45  | 0    | 0    | 2 |
| IPR010768       | 1.28  | 0     | 1.28 | 1.33 | 2 |
| IPR010760       | 1.11  | 1.11  | 0    | 0    | 2 |
| PTHR21261       | 7.4   | 7.4   | 0    | 0    | 2 |
| IPR020941       | 1.27  | 1.25  | 1.27 | 0    | 2 |
| IPR012682       | 3.43  | 3.43  | 0    | 0    | 2 |
| IPR021900       | 1.35  | 1.35  | 0    | 0    | 2 |
| IPR021901       | 3.06  | 3.06  | 0    | 0    | 2 |
| IPR021909       | 4.38  | 0     | 4.38 | 0    | 2 |
| IPR002910       | 3     | 3     | 0    | 0    | 2 |
| IPR003120       | 1.03  | 1.03  | 0    | 0    | 2 |
| IPR005073       | 1.08  | 0     | 1.08 | 0    | 2 |
| PF05682         | 2.16  | 3     | 1    | 0    | 2 |
| IPR007763       | 1.44  | 2.05  | 1.02 | 0    | 2 |
| IPR003226       | 1.31  | 1.41  | 1.1  | 0    | 2 |
| IPR000754       | 1.15  | 2.57  | 1.01 | 1    | 2 |
| IPR015850       | 1.28  | 0     | 1.28 | 1.17 | 2 |
| IPR001150       | 2.92  | 2     | 2.95 | 1    | 2 |
| IPR001156       | 7.97  | 8.19  | 0    | 1    | 2 |
| IPR008336       | 1.38  | 1.39  | 0    | 1    | 2 |
| IPR013846       | 1.3   | 1.3   | 0    | 0    | 2 |
| IPR015496       | 1.33  | 1.33  | 0    | 0    | 2 |
| IPR004268       | 1.2   | 1.67  | 1.2  | 1    | 2 |
| PF11864         | 1.38  | 1.38  | 0    | 0    | 2 |
| PF11861         | 1.11  | 1.11  | 0    | 0    | 2 |
| PF10029         | 1.07  | 0     | 1.07 | 0    | 2 |
| PTHR23139       | 1.2   | 1.2   | 0    | 0    | 2 |
| PTHR21572       | 6.83  | 6.83  | 0    | 0    | 2 |
| PTHR21391       | 5.07  | 5.07  | 0    | 0    | 2 |
| IPR007397       | 7     | 7     | 0    | 0    | 2 |
| IPR006606       | 1.32  | 1.32  | 0    | 0    | 2 |
| IPR006604       | 13.41 | 13.41 | 0    | 0    | 2 |
| PF01162         | 1.07  | 1.13  | 1.01 | 1.74 | 2 |
| IPR007268       | 1.37  | 1.37  | 0    | 0    | 2 |
| IPR013644       | 1.04  | 1.3   | 1.03 | 0    | 2 |
| IPR013642       | 5     | 5     | 0    | 0    | 2 |
| IPR000128       | 2.4   | 2.4   | 0    | 0    | 2 |
| IPR001839       | 12.42 | 12.42 | 0    | 0    | 2 |
| IPR021211       | 1     | 1     | 0    | 0    | 2 |
| IPR012511       | 1.67  | 1.67  | 0    | 0    | 2 |
| IPR011090       | 1.28  | 1     | 1.29 | 0    | 2 |
| IPR011099       | 1.11  | 1.38  | 1.07 | 1    | 2 |
| IPR019413       | 1.16  | 1.16  | 0    | 0    | 2 |
| PF08683         | 1.88  | 1.88  | 0    | 0    | 2 |
| IPR021451       | 2.52  | 0     | 2.52 | 0    | 2 |
| IPR018632       | 1.24  | 0     | 1.28 | 1    | 2 |
| IPR022181       | 2.6   | 2.6   | 0    | 0    | 2 |
| IPR022185       | 2.95  | 2.95  | 0    | 0    | 2 |
| IPR021989       | 3     | 3     | 0    | 0    | 2 |
| PTHR10596:SF115 | 1     | 0     | 1    | 1    | 2 |
| IPR011871       | 2.71  | 0     | 2.71 | 0    | 2 |
| IPR007873       | 1.31  | 1.31  | 0    | 0    | 2 |
| PTHR18806       | 1     | 1     | 0    | 0    | 2 |
| IPR013560       | 1.06  | 0     | 1.06 | 1    | 2 |
| IPR004033       | 1.26  | 1.66  | 1.21 | 1.25 | 2 |
| IPR004031       | 15.23 | 15.23 | 0    | 0    | 2 |
| IPR015371       | 1.4   | 1.4   | 0    | 0    | 2 |

|                |       |       |       |      |   |
|----------------|-------|-------|-------|------|---|
| IPR019455      | 1.11  | 1.97  | 1.06  | 1.04 | 2 |
| PTHR19861      | 1.17  | 1.5   | 1     | 0    | 2 |
| IPR019220      | 1.3   | 0     | 1.3   | 0    | 2 |
| IPR002692      | 1.57  | 2     | 1.59  | 1    | 2 |
| IPR011681      | 1.53  | 0     | 1.58  | 1    | 2 |
| IPR011686      | 1.2   | 0     | 1.2   | 0    | 2 |
| IPR011685      | 2     | 2.17  | 1     | 0    | 2 |
| IPR001409      | 2.14  | 2.14  | 0     | 0    | 2 |
| PTHR12553:SF6  | 1.06  | 1     | 1.08  | 0    | 2 |
| IPR018779      | 1.01  | 0     | 1.01  | 0    | 2 |
| PTHR10074      | 1.13  | 1.44  | 1.05  | 0    | 2 |
| IPR008912      | 1.56  | 1     | 1.59  | 1.14 | 2 |
| IPR010318      | 1.48  | 1.42  | 1.48  | 1.67 | 2 |
| IPR002817      | 1.1   | 1.67  | 1.07  | 1.39 | 2 |
| IPR002816      | 1.31  | 1.94  | 1     | 1    | 2 |
| IPR002815      | 1.32  | 1.33  | 0     | 1    | 2 |
| IPR002813      | 1.06  | 1.18  | 1.06  | 1    | 2 |
| IPR013929      | 1.1   | 1.1   | 0     | 0    | 2 |
| IPR000412      | 1     | 0     | 1     | 1    | 2 |
| PTHR15555      | 1     | 1     | 0     | 0    | 2 |
| IPR013153      | 1.11  | 0     | 1.08  | 2    | 2 |
| PTHR23036:SF29 | 1     | 1     | 0     | 0    | 2 |
| IPR005134      | 1.15  | 4.43  | 1.06  | 1    | 2 |
| IPR005131      | 1.42  | 1.2   | 1.42  | 1    | 2 |
| IPR018983      | 1.19  | 1.19  | 0     | 0    | 2 |
| IPR018984      | 1.35  | 0     | 1.35  | 0    | 2 |
| IPR009308      | 1.04  | 0     | 1.04  | 0    | 2 |
| IPR009302      | 1.67  | 0     | 1.67  | 0    | 2 |
| IPR007135      | 1.86  | 1.86  | 0     | 0    | 2 |
| IPR003491      | 1.4   | 1     | 1.4   | 0    | 2 |
| IPR004753      | 1.46  | 1     | 1.47  | 1    | 2 |
| PTHR21666:SF1  | 1     | 0     | 1     | 0    | 2 |
| IPR003302      | 2.16  | 2.4   | 1.25  | 0    | 2 |
| PTHR23155:SF10 | 2.33  | 2.33  | 0     | 0    | 2 |
| IPR007155      | 1.11  | 0     | 0     | 1.11 | 2 |
| IPR007157      | 1.47  | 1.62  | 1.48  | 1.11 | 2 |
| IPR007150      | 1.18  | 1.18  | 0     | 0    | 2 |
| IPR013317      | 1.08  | 0     | 1.08  | 0    | 2 |
| IPR021295      | 1.18  | 0     | 1.18  | 0    | 2 |
| IPR019610      | 1.3   | 1.3   | 0     | 0    | 2 |
| IPR021832      | 3.23  | 3.23  | 0     | 0    | 2 |
| IPR008899      | 4     | 4     | 0     | 0    | 2 |
| IPR008895      | 1.08  | 1.08  | 0     | 0    | 2 |
| IPR008894      | 1.26  | 1     | 1.28  | 1    | 2 |
| IPR003842      | 11.67 | 0     | 11.67 | 0    | 2 |
| IPR003848      | 2.04  | 1.56  | 2.06  | 1    | 2 |
| IPR014886      | 2.11  | 2.14  | 1     | 0    | 2 |
| IPR014885      | 2.05  | 2.05  | 0     | 0    | 2 |
| IPR014882      | 2.31  | 2.31  | 0     | 0    | 2 |
| PTHR11926:SF2  | 1.2   | 1     | 1.3   | 0    | 2 |
| IPR012907      | 1.64  | 0     | 1.64  | 0    | 2 |
| IPR012900      | 7.33  | 7.33  | 0     | 0    | 2 |
| IPR012901      | 1.39  | 1.39  | 1     | 0    | 2 |
| IPR012903      | 4.47  | 1     | 4.54  | 0    | 2 |
| IPR021148      | 6.18  | 6.18  | 0     | 0    | 2 |
| IPR001233      | 1.35  | 1.51  | 1.37  | 1.09 | 2 |
| IPR022102      | 2.5   | 2.56  | 1     | 0    | 2 |
| IPR022106      | 5.2   | 5.2   | 0     | 0    | 2 |
| PTHR21290      | 1.83  | 2     | 1     | 0    | 2 |
| TIGR03309      | 1.02  | 0     | 1.02  | 0    | 2 |
| IPR020997      | 1.67  | 1.67  | 0     | 0    | 2 |
| IPR003534      | 5.42  | 11.71 | 1.75  | 0    | 2 |
| IPR007690      | 1.2   | 1     | 1.2   | 0    | 2 |
| IPR007344      | 1.58  | 1.2   | 1.59  | 1.67 | 2 |
| IPR007340      | 1.3   | 0     | 1.3   | 0    | 2 |
| IPR004619      | 1.05  | 1     | 1.05  | 0    | 2 |
| IPR012654      | 1.03  | 0     | 1.03  | 0    | 2 |
| IPR001393      | 2.36  | 2.36  | 0     | 0    | 2 |
| IPR021314      | 2.83  | 0     | 2.83  | 0    | 2 |



|                |       |       |      |      |   |
|----------------|-------|-------|------|------|---|
| IPR009594      | 1.8   | 1.5   | 1.8  | 0    | 2 |
| PF01828        | 2.55  | 3.55  | 1.6  | 1    | 2 |
| IPR010407      | 3.2   | 3.2   | 0    | 0    | 2 |
| IPR010405      | 1.48  | 1.48  | 0    | 0    | 2 |
| PF04044        | 1.33  | 1.33  | 0    | 0    | 2 |
| PTHR19845      | 1     | 1     | 1    | 0    | 2 |
| PTHR22970      | 1.25  | 1.25  | 0    | 0    | 2 |
| IPR005813      | 1.04  | 1.54  | 1.02 | 0    | 2 |
| IPR007061      | 2.98  | 0     | 2.98 | 0    | 2 |
| IPR007060      | 1.23  | 1     | 1.23 | 0    | 2 |
| IPR007062      | 1.9   | 1.9   | 0    | 0    | 2 |
| IPR007065      | 1.23  | 1.52  | 1.19 | 1.2  | 2 |
| IPR003762      | 1.1   | 0     | 1.1  | 1    | 2 |
| IPR001727      | 2.38  | 3.41  | 2.14 | 1.67 | 2 |
| IPR001721      | 1.81  | 2.21  | 1.78 | 0    | 2 |
| IPR005494      | 1.56  | 4     | 1.55 | 0    | 2 |
| IPR013733      | 3.09  | 4.29  | 1    | 0    | 2 |
| IPR000235      | 1.14  | 2.45  | 1.01 | 1    | 2 |
| IPR008388      | 1.42  | 1.42  | 0    | 0    | 2 |
| IPR008383      | 1.71  | 1.71  | 0    | 0    | 2 |
| PTHR23264:SF4  | 1     | 1     | 1    | 1    | 2 |
| IPR008384      | 1.19  | 1.19  | 0    | 0    | 2 |
| PTHR13593      | 1.21  | 1.24  | 1    | 0    | 2 |
| IPR008491      | 1.23  | 1.23  | 0    | 0    | 2 |
| IPR014021      | 1     | 1     | 1    | 0    | 2 |
| PTHR11945:SF36 | 1.25  | 1.25  | 0    | 0    | 2 |
| IPR001297      | 7.89  | 0     | 7.89 | 0    | 2 |
| IPR001293      | 1.33  | 1.33  | 0    | 0    | 2 |
| IPR008813      | 1.03  | 0     | 1.03 | 0    | 2 |
| IPR012987      | 3.29  | 3.29  | 0    | 0    | 2 |
| IPR006502      | 13    | 13    | 0    | 0    | 2 |
| IPR012988      | 1.85  | 1.85  | 0    | 0    | 2 |
| IPR007455      | 1.33  | 1.33  | 0    | 0    | 2 |
| IPR007452      | 1.2   | 1.12  | 1.2  | 0    | 2 |
| PTHR13871:SF2  | 4.67  | 4.67  | 0    | 0    | 2 |
| PTHR18934      | 2.28  | 2.28  | 0    | 0    | 2 |
| PF10478        | 1.46  | 1.46  | 0    | 0    | 2 |
| IPR009464      | 1.42  | 1.42  | 0    | 0    | 2 |
| TIGR01098      | 1.26  | 0     | 1.26 | 1.5  | 2 |
| PTHR23124:SF7  | 1.18  | 0     | 1.25 | 1    | 2 |
| PTHR23124:SF9  | 2.2   | 2.5   | 1    | 0    | 2 |
| IPR007613      | 6.14  | 6.14  | 0    | 0    | 2 |
| IPR013219      | 1.12  | 1.12  | 0    | 0    | 2 |
| IPR001312      | 9.69  | 10.51 | 2    | 0    | 2 |
| IPR019156      | 1.17  | 1.17  | 0    | 0    | 2 |
| IPR019154      | 1.65  | 1.65  | 0    | 0    | 2 |
| IPR019481      | 1.15  | 1.15  | 0    | 0    | 2 |
| IPR019482      | 1.85  | 1.85  | 0    | 0    | 2 |
| IPR019486      | 6     | 6     | 0    | 0    | 2 |
| IPR021973      | 1     | 1     | 1    | 0    | 2 |
| PTHR10676      | 1.36  | 1.36  | 0    | 0    | 2 |
| IPR018689      | 1.09  | 0     | 1.09 | 0    | 2 |
| IPR011531      | 4.19  | 4.19  | 0    | 0    | 2 |
| IPR018125      | 2.81  | 2.81  | 0    | 0    | 2 |
| IPR013973      | 1.1   | 0     | 1.09 | 1.2  | 2 |
| PF07814        | 1.35  | 1.35  | 0    | 0    | 2 |
| IPR008670      | 1.03  | 0     | 1.02 | 1.33 | 2 |
| IPR012413      | 4.02  | 0     | 4.02 | 0    | 2 |
| IPR011434      | 1.94  | 0     | 1.94 | 0    | 2 |
| IPR009600      | 1.28  | 1.28  | 0    | 0    | 2 |
| PTHR10168      | 2.82  | 3.38  | 1    | 0    | 2 |
| IPR007793      | 1.65  | 1     | 1.65 | 0    | 2 |
| IPR007797      | 2.8   | 2.8   | 0    | 0    | 2 |
| IPR007794      | 2.6   | 2.6   | 0    | 0    | 2 |
| IPR012466      | 1.54  | 1.54  | 0    | 0    | 2 |
| IPR012464      | 21.12 | 21.12 | 0    | 0    | 2 |
| IPR009651      | 1.03  | 1.43  | 1.01 | 0    | 2 |
| IPR001102      | 4.04  | 4.04  | 0    | 0    | 2 |
| IPR001103      | 2.44  | 2.44  | 0    | 0    | 2 |

|                |       |       |      |      |   |
|----------------|-------|-------|------|------|---|
| IPR022055      | 1.03  | 0     | 1.03 | 0    | 2 |
| IPR022056      | 1.5   | 1.5   | 0    | 0    | 2 |
| IPR005683      | 1.2   | 1.2   | 0    | 0    | 2 |
| IPR008300      | 2.54  | 0     | 2.54 | 0    | 2 |
| IPR004884      | 5.25  | 3     | 6    | 0    | 2 |
| IPR015117      | 1.47  | 3     | 1.36 | 0    | 2 |
| IPR002486      | 54.5  | 54.5  | 0    | 0    | 2 |
| IPR002487      | 46.22 | 46.22 | 0    | 0    | 2 |
| IPR010561      | 3.03  | 3.03  | 0    | 0    | 2 |
| IPR010563      | 1.26  | 0     | 1.26 | 0    | 2 |
| IPR010565      | 1.21  | 1.21  | 0    | 0    | 2 |
| PTHR10357      | 1.17  | 1.67  | 1    | 0    | 2 |
| PTHR10351      | 1     | 1     | 0    | 0    | 2 |
| IPR012873      | 3.05  | 0     | 3.05 | 0    | 2 |
| IPR012874      | 4.75  | 0     | 1    | 6    | 2 |
| IPR007608      | 14.57 | 14.57 | 0    | 0    | 2 |
| IPR021747      | 1.23  | 1     | 1.23 | 0    | 2 |
| IPR021740      | 4.27  | 4.27  | 0    | 0    | 2 |
| IPR022216      | 1     | 0     | 1    | 0    | 2 |
| IPR022215      | 1     | 0     | 1    | 0    | 2 |
| IPR022211      | 1.2   | 1     | 1.2  | 0    | 2 |
| IPR022218      | 2.67  | 0     | 2.67 | 0    | 2 |
| IPR006585      | 1.15  | 1.15  | 0    | 0    | 2 |
| IPR007182      | 1.26  | 0     | 1.22 | 1.82 | 2 |
| IPR001809      | 1.5   | 0     | 1.5  | 0    | 2 |
| IPR007233      | 2.12  | 2.12  | 0    | 0    | 2 |
| IPR016158      | 1.08  | 1.08  | 0    | 0    | 2 |
| IPR008400      | 4     | 4     | 0    | 0    | 2 |
| IPR000177      | 8.38  | 8.38  | 0    | 0    | 2 |
| PTHR23229      | 2.12  | 2.12  | 0    | 0    | 2 |
| PTHR10967      | 1.43  | 1.5   | 1    | 0    | 2 |
| IPR015633      | 1.17  | 1.17  | 0    | 0    | 2 |
| IPR019395      | 1.5   | 1.5   | 0    | 0    | 2 |
| IPR018445      | 1.14  | 0     | 1.13 | 1.31 | 2 |
| PF11700        | 1.21  | 2.09  | 1.09 | 0    | 2 |
| PF11701        | 1.17  | 1.17  | 0    | 0    | 2 |
| IPR005498      | 1.88  | 0     | 1.88 | 0    | 2 |
| IPR002729      | 1.68  | 0     | 1.68 | 1.62 | 2 |
| IPR003896      | 1.29  | 0     | 1.29 | 0    | 2 |
| IPR010716      | 2.67  | 2.67  | 0    | 0    | 2 |
| PTHR19432:SF5  | 1.42  | 1.42  | 0    | 0    | 2 |
| IPR000814      | 4.19  | 4.97  | 0    | 2.85 | 2 |
| IPR001093      | 1.29  | 2.03  | 1.23 | 1    | 2 |
| IPR019497      | 2.15  | 2.15  | 0    | 0    | 2 |
| PTHR10343:SF10 | 1.28  | 1.36  | 1    | 0    | 2 |
| IPR015388      | 1.5   | 1.5   | 0    | 0    | 2 |
| IPR009955      | 1.44  | 1.44  | 0    | 0    | 2 |
| IPR010261      | 2.58  | 4     | 2.56 | 0    | 2 |
| IPR007888      | 1.86  | 1.86  | 0    | 0    | 2 |
| PF01745        | 1.05  | 1     | 1.05 | 0    | 2 |
| IPR010844      | 2.71  | 2.78  | 1    | 0    | 2 |
| IPR018884      | 3.2   | 3.2   | 0    | 0    | 2 |
| IPR004394      | 1.04  | 1.39  | 1.01 | 0    | 2 |
| IPR005321      | 1.34  | 1.17  | 1.36 | 1    | 2 |
| IPR004937      | 1.26  | 4.67  | 1.02 | 0    | 2 |
| IPR015908      | 2.67  | 2.32  | 2.83 | 0    | 2 |
| IPR011678      | 1.12  | 1.12  | 0    | 0    | 2 |
| IPR011677      | 2.12  | 2.12  | 0    | 0    | 2 |
| IPR020810      | 1.21  | 2.42  | 1.08 | 1.11 | 2 |
| IPR020818      | 1.38  | 1.6   | 1.34 | 0    | 2 |
| IPR007710      | 1.21  | 1.62  | 1.19 | 1.2  | 2 |
| PTHR11711:SF4  | 1     | 1     | 0    | 0    | 2 |
| IPR021056      | 1.03  | 1.03  | 0    | 0    | 2 |
| IPR015199      | 1.01  | 0     | 1.01 | 0    | 2 |
| IPR006808      | 1.52  | 1.52  | 0    | 0    | 2 |
| IPR005600      | 1     | 1     | 0    | 0    | 2 |
| PTHR18937:SF13 | 1.14  | 1.4   | 1    | 1    | 2 |
| IPR003134      | 9.24  | 9.24  | 0    | 0    | 2 |
| PTHR11089      | 1.08  | 1.08  | 0    | 0    | 2 |

|                |       |      |       |      |   |
|----------------|-------|------|-------|------|---|
| MF_00336       | 1     | 0    | 1     | 0    | 2 |
| IPR013167      | 1.12  | 1.12 | 0     | 0    | 2 |
| IPR000440      | 1.32  | 2.72 | 1.17  | 1    | 2 |
| PF04703        | 1.14  | 0    | 1.17  | 1    | 2 |
| PTHR22635      | 1.25  | 1.25 | 0     | 0    | 2 |
| IPR006678      | 1.46  | 1.58 | 0     | 1.38 | 2 |
| IPR003481      | 1.16  | 1    | 1.16  | 0    | 2 |
| IPR000680      | 24.25 | 0    | 24.25 | 0    | 2 |
| PF11798        | 1.43  | 0    | 1.43  | 0    | 2 |
| PF06544        | 1.26  | 1.26 | 0     | 0    | 2 |
| IPR012542      | 2.5   | 2.5  | 0     | 0    | 2 |
| IPR015012      | 1.39  | 1.39 | 0     | 0    | 2 |
| IPR006998      | 1.14  | 0    | 1.14  | 0    | 2 |
| IPR006999      | 1.15  | 0    | 1.15  | 0    | 2 |
| PTHR10782      | 1.6   | 1.6  | 0     | 0    | 2 |
| IPR010791      | 1.07  | 1.3  | 1.04  | 1    | 2 |
| IPR014859      | 1.1   | 1    | 1.11  | 0    | 2 |
| IPR014857      | 1.15  | 1.15 | 0     | 0    | 2 |
| IPR000896      | 8.11  | 8.11 | 0     | 0    | 2 |
| PF11979        | 1.52  | 1.52 | 0     | 0    | 2 |
| PF03128        | 2.31  | 2.42 | 1     | 0    | 2 |
| PTHR11938:SF9  | 1     | 0    | 1     | 0    | 2 |
| IPR022159      | 1.28  | 1.28 | 0     | 0    | 2 |
| PTHR10032:SF71 | 1     | 1    | 0     | 0    | 2 |
| PTHR23224:SF47 | 1.25  | 1.25 | 0     | 0    | 2 |
| PTHR23224:SF47 | 1.2   | 1.2  | 0     | 0    | 2 |
| IPR013532      | 2.17  | 2.17 | 0     | 0    | 2 |
| IPR013530      | 2.35  | 2.93 | 1     | 0    | 2 |
| IPR013531      | 1.89  | 1.89 | 0     | 0    | 2 |
| IPR013539      | 1.04  | 1.58 | 1.02  | 1    | 2 |
| IPR021341      | 1.64  | 1    | 1.66  | 0    | 2 |
| IPR012660      | 1.02  | 1    | 1.02  | 0    | 2 |
| IPR005337      | 1.03  | 1    | 1.03  | 0    | 2 |
| IPR019297      | 1.03  | 0    | 1.03  | 0    | 2 |
| IPR019291      | 1.14  | 1    | 1.14  | 0    | 2 |
| PF01851        | 6.41  | 6.41 | 0     | 0    | 2 |
| IPR019431      | 1     | 1    | 0     | 0    | 2 |
| IPR021229      | 1.38  | 0    | 1.36  | 2    | 2 |
| IPR010181      | 2.04  | 1    | 2.14  | 1.17 | 2 |
| IPR014958      | 1.37  | 0    | 1.26  | 1.73 | 2 |
| IPR013988      | 1.06  | 1    | 1.06  | 0    | 2 |
| PTHR11731:SF7  | 1.18  | 1    | 1.22  | 1    | 2 |
| IPR019680      | 1.22  | 1.22 | 0     | 0    | 2 |
| PF12202        | 3     | 3    | 0     | 0    | 2 |
| PTHR12294      | 1.1   | 1.1  | 0     | 0    | 2 |
| IPR004178      | 3.16  | 3.16 | 0     | 0    | 2 |
| IPR004173      | 1.05  | 0    | 1.02  | 2    | 2 |
| TIGR03063      | 1.95  | 0    | 1.95  | 0    | 2 |
| IPR015264      | 1     | 0    | 0     | 1    | 2 |
| IPR015260      | 1.79  | 1.79 | 0     | 0    | 2 |
| IPR019343      | 1.21  | 1.21 | 0     | 0    | 2 |
| IPR010344      | 1.38  | 0    | 1.38  | 0    | 2 |
| IPR010349      | 1.13  | 1    | 1.14  | 0    | 2 |
| PF04257        | 1.04  | 1    | 1.04  | 1    | 2 |
| IPR002848      | 1.71  | 2.24 | 1     | 1    | 2 |
| IPR006748      | 1.21  | 1    | 1.21  | 0    | 2 |
| IPR003719      | 1.59  | 1.83 | 1.58  | 1.1  | 2 |
| IPR013703      | 1.01  | 1    | 1.01  | 0    | 2 |
| IPR013705      | 1.9   | 1.9  | 0     | 0    | 2 |
| IPR013706      | 2.39  | 2.39 | 0     | 0    | 2 |
| IPR004872      | 2.07  | 2    | 2.07  | 0    | 2 |
| IPR000724      | 2.2   | 0    | 2.2   | 0    | 2 |
| PTHR23272      | 1.8   | 1.8  | 0     | 0    | 2 |
| PTHR23270      | 1.5   | 1.5  | 0     | 0    | 2 |
| PTHR23274      | 1.25  | 2    | 1     | 0    | 2 |
| PTHR23083:SF21 | 1.15  | 1.22 | 1.12  | 0    | 2 |
| PTHR12553      | 1.12  | 1.25 | 1.06  | 0    | 2 |
| IPR015097      | 1.67  | 1.67 | 0     | 0    | 2 |
| IPR015096      | 3.4   | 3.4  | 0     | 0    | 2 |

|                 |       |       |      |      |   |
|-----------------|-------|-------|------|------|---|
| IPR015094       | 1.69  | 0     | 1.69 | 0    | 2 |
| IPR021840       | 3.83  | 3.83  | 0    | 0    | 2 |
| IPR021845       | 1.66  | 0     | 1.66 | 0    | 2 |
| PF02935         | 1.35  | 1.35  | 0    | 0    | 2 |
| IPR009825       | 2.31  | 0     | 2.29 | 2.6  | 2 |
| IPR007466       | 1.27  | 1.64  | 1.25 | 1    | 2 |
| IPR019328       | 1.22  | 1.22  | 0    | 0    | 2 |
| PF11409         | 1.24  | 1.24  | 0    | 0    | 2 |
| IPR007667       | 1.7   | 2.41  | 1.03 | 0    | 2 |
| PTHR23224:SF38: | 1.2   | 1.2   | 0    | 0    | 2 |
| IPR004647       | 1.32  | 1.44  | 1.33 | 1.07 | 2 |
| IPR015350       | 1.63  | 1.63  | 0    | 0    | 2 |
| IPR015351       | 1.63  | 1.63  | 0    | 0    | 2 |
| IPR009642       | 3.3   | 0     | 3.3  | 0    | 2 |
| IPR018302       | 1     | 1     | 0    | 0    | 2 |
| PTHR11865       | 1     | 1     | 0    | 0    | 2 |
| PTHR11246       | 1.21  | 1.21  | 0    | 0    | 2 |
| IPR013908       | 1.57  | 1.57  | 0    | 0    | 2 |
| IPR006075       | 1.09  | 1.26  | 1.03 | 1.74 | 2 |
| IPR013164       | 40    | 40    | 0    | 0    | 2 |
| IPR003793       | 1.35  | 0     | 1.37 | 1.07 | 2 |
| IPR004564       | 1.25  | 1     | 1.25 | 1    | 2 |
| IPR012438       | 13.29 | 13.29 | 0    | 0    | 2 |
| IPR009662       | 1.07  | 0     | 1.07 | 0    | 2 |
| IPR022007       | 3.33  | 3.33  | 0    | 0    | 2 |
| IPR022005       | 1.5   | 1.5   | 0    | 0    | 2 |
| IPR019774       | 1.62  | 3.34  | 1.21 | 0    | 2 |
| IPR009087       | 1.67  | 1.67  | 0    | 0    | 2 |
| IPR007293       | 1.29  | 0     | 1.29 | 0    | 2 |
| IPR012849       | 3.12  | 3.12  | 0    | 0    | 2 |
| PTHR10588:SF26  | 1.18  | 1.18  | 0    | 0    | 2 |
| IPR021776       | 1.14  | 0     | 1.14 | 0    | 2 |
| PTHR22683       | 1.27  | 5     | 1    | 0    | 2 |
| PF09664         | 1.13  | 1     | 1.14 | 1    | 2 |
| IPR013085       | 1.29  | 1.29  | 0    | 0    | 2 |
| IPR013082       | 1.09  | 1.38  | 1.03 | 0    | 2 |
| IPR007206       | 1.15  | 1.15  | 0    | 0    | 2 |
| IPR013629       | 2.2   | 2.2   | 0    | 0    | 2 |
| IPR013621       | 2.39  | 2.39  | 0    | 0    | 2 |
| IPR013627       | 1.24  | 1.24  | 0    | 0    | 2 |
| PF11779         | 1.86  | 1.86  | 0    | 0    | 2 |
| PF11775         | 1.08  | 1     | 1.09 | 1    | 2 |
| IPR002266       | 2     | 2     | 0    | 0    | 2 |
| IPR006964       | 1.38  | 1.38  | 0    | 0    | 2 |
| PTHR10648       | 1.56  | 1.56  | 0    | 0    | 2 |
| PTHR12451       | 2.12  | 2.12  | 0    | 0    | 2 |
| IPR020966       | 6     | 7.15  | 1    | 0    | 2 |
| IPR020969       | 4     | 4     | 0    | 0    | 2 |
| IPR020968       | 1     | 0     | 1    | 0    | 2 |
| PTHR23083:SF9   | 1     | 0     | 1    | 0    | 2 |
| IPR001346       | 10.36 | 10.36 | 0    | 0    | 2 |
| IPR001340       | 4.09  | 0     | 4.09 | 0    | 2 |
| TIGR03669       | 1.25  | 0     | 1    | 1.5  | 2 |
| IPR021922       | 2.45  | 2.45  | 0    | 0    | 2 |
| IPR018653       | 1.56  | 0     | 1.56 | 0    | 2 |
| PTHR10194       | 1.33  | 1.33  | 0    | 0    | 2 |
| IPR009908       | 1.28  | 0     | 1.28 | 0    | 2 |
| IPR009909       | 8     | 8     | 0    | 0    | 2 |
| IPR007504       | 1.1   | 1.16  | 0    | 1    | 2 |
| IPR013802       | 1.17  | 1.5   | 1.08 | 0    | 2 |
| IPR001626       | 1.82  | 0     | 1.84 | 1.32 | 2 |
| IPR019249       | 1.57  | 0     | 0    | 1.57 | 2 |
| IPR019461       | 1.05  | 1.05  | 0    | 0    | 2 |
| IPR005011       | 1.27  | 1.27  | 0    | 0    | 2 |
| IPR009571       | 5.03  | 5.03  | 0    | 0    | 2 |
| IPR002546       | 2.65  | 2.65  | 0    | 0    | 2 |
| TIGR01499       | 1.47  | 1.69  | 1    | 0    | 2 |
| PTHR18763       | 1     | 1     | 0    | 0    | 2 |
| IPR021068       | 1.18  | 0     | 1.2  | 1    | 2 |

|                |      |      |      |      |   |
|----------------|------|------|------|------|---|
| IPR021064      | 3.33 | 3.33 | 0    | 0    | 2 |
| IPR015165      | 1    | 0    | 1    | 0    | 2 |
| IPR011420      | 1    | 1    | 0    | 0    | 2 |
| IPR013865      | 1.1  | 1.1  | 0    | 0    | 2 |
| IPR009767      | 1.17 | 0    | 1.17 | 0    | 2 |
| IPR003163      | 1.45 | 1.45 | 0    | 0    | 2 |
| IPR003164      | 1.36 | 1.36 | 0    | 0    | 2 |
| IPR005203      | 9.26 | 9.26 | 0    | 0    | 2 |
| IPR018925      | 1.33 | 0    | 1.33 | 0    | 2 |
| PF10594        | 1.8  | 1.8  | 0    | 0    | 2 |
| PTHR14344      | 1.18 | 1.18 | 0    | 0    | 2 |
| PTHR22605      | 2    | 2    | 0    | 0    | 2 |
| IPR022246      | 1    | 0    | 1    | 0    | 2 |
| IPR022247      | 2.08 | 2.08 | 0    | 0    | 2 |
| IPR022242      | 7.25 | 7.25 | 0    | 0    | 2 |
| IPR000100      | 1.02 | 1    | 1.02 | 0    | 2 |
| IPR001855      | 9    | 9    | 0    | 0    | 2 |
| PTHR16091      | 1.12 | 1.12 | 0    | 0    | 2 |
| IPR021235      | 1.48 | 0    | 1.5  | 1    | 2 |
| PTHR10937      | 1    | 0    | 1    | 1    | 2 |
| IPR019544      | 1.25 | 1.26 | 1    | 0    | 2 |
| IPR019548      | 3.61 | 3.61 | 0    | 0    | 2 |
| IPR002190      | 3.53 | 3.53 | 0    | 0    | 2 |
| IPR003829      | 2.2  | 2.07 | 2.26 | 1    | 2 |
| IPR014799      | 2.17 | 2.17 | 0    | 0    | 2 |
| IPR017444      | 1.44 | 3    | 1.37 | 1    | 2 |
| IPR014868      | 9.62 | 9.62 | 0    | 0    | 2 |
| PTHR15180      | 1.29 | 1.29 | 0    | 0    | 2 |
| IPR000887      | 1.56 | 1.5  | 1.57 | 1.25 | 2 |
| TIGR01713      | 1.14 | 0    | 1.14 | 0    | 2 |
| IPR022161      | 1    | 1    | 1    | 0    | 2 |
| IPR022163      | 1.06 | 1.14 | 1    | 0    | 2 |
| IPR022165      | 4    | 4    | 0    | 0    | 2 |
| IPR022169      | 2.68 | 0    | 2.68 | 0    | 2 |
| IPR006454      | 5.44 | 0    | 1    | 6    | 2 |
| IPR007583      | 2.25 | 2.25 | 0    | 0    | 2 |
| IPR010812      | 1.04 | 0    | 1.04 | 0    | 2 |
| PF07015        | 1.09 | 0    | 1.11 | 1    | 2 |
| IPR003669      | 1.16 | 0    | 1.17 | 1.08 | 2 |
| PF03667        | 1.18 | 0    | 1.18 | 0    | 2 |
| IPR015011      | 1.1  | 0    | 1    | 1.1  | 2 |
| IPR018515      | 1.3  | 1.3  | 0    | 0    | 2 |
| IPR018513      | 1.16 | 0    | 1.16 | 0    | 2 |
| PF05622        | 2.21 | 2.21 | 0    | 0    | 2 |
| PF12063        | 1.35 | 1.35 | 0    | 0    | 2 |
| IPR006846      | 1.28 | 1.36 | 0    | 1    | 2 |
| IPR019387      | 1.03 | 1.03 | 0    | 0    | 2 |
| IPR015609      | 1    | 1    | 1    | 0    | 2 |
| PTHR12247      | 1.17 | 1.17 | 0    | 0    | 2 |
| PTHR20920      | 1.1  | 1.1  | 0    | 0    | 2 |
| IPR018227      | 3.36 | 3.89 | 3.35 | 1.5  | 2 |
| PTHR23224:SF51 | 1    | 1    | 0    | 0    | 2 |
| IPR019006      | 1    | 1    | 0    | 0    | 2 |
| IPR021601      | 1.11 | 1.11 | 0    | 0    | 2 |
| IPR021600      | 1.12 | 1.12 | 0    | 0    | 2 |
| IPR021605      | 1    | 1    | 0    | 0    | 2 |
| IPR018752      | 1.08 | 0    | 1.08 | 1    | 2 |
| IPR018758      | 1.15 | 0    | 1.15 | 0    | 2 |
| IPR015251      | 1    | 0    | 1    | 0    | 2 |
| IPR015253      | 1.67 | 1.67 | 0    | 0    | 2 |
| IPR005115      | 2.67 | 3    | 2.7  | 1.96 | 2 |
| IPR009327      | 1.11 | 1.59 | 1.05 | 1    | 2 |
| IPR011104      | 1.06 | 1    | 1.06 | 1    | 2 |
| IPR011100      | 1.11 | 1.38 | 1.07 | 1    | 2 |
| PTHR23083:SF10 | 1    | 1    | 1    | 0    | 2 |
| TIGR02246      | 1.23 | 1    | 1.23 | 0    | 2 |
| PTHR23155:SF34 | 3    | 3.33 | 1    | 0    | 2 |
| IPR007175      | 1.3  | 1.49 | 0    | 1    | 2 |
| IPR007174      | 1.19 | 1.19 | 0    | 0    | 2 |

|                |       |       |      |      |   |
|----------------|-------|-------|------|------|---|
| PTHR15491:SF1  | 1.83  | 1.83  | 0    | 0    | 2 |
| TIGR00269      | 1.1   | 1     | 1    | 1.15 | 2 |
| TIGR00268      | 1     | 0     | 1    | 0    | 2 |
| IPR021105      | 1.33  | 1.33  | 0    | 0    | 2 |
| IPR021102      | 1.78  | 2.04  | 1    | 1    | 2 |
| PTHR22522      | 1.38  | 1.38  | 0    | 0    | 2 |
| IPR019635      | 1.07  | 1     | 1.07 | 0    | 2 |
| IPR015041      | 1.02  | 0     | 1.02 | 0    | 2 |
| IPR021812      | 2.05  | 1     | 2.07 | 0    | 2 |
| IPR021818      | 4     | 4     | 0    | 0    | 2 |
| IPR021819      | 1.25  | 1.25  | 0    | 0    | 2 |
| IPR007438      | 1.28  | 1     | 1.28 | 1.47 | 2 |
| IPR007432      | 1.05  | 0     | 1.05 | 0    | 2 |
| IPR007436      | 1.35  | 1     | 1.36 | 1    | 2 |
| PTHR10499:SF96 | 1     | 0     | 1    | 0    | 2 |
| IPR008752      | 4     | 34    | 1    | 0    | 2 |
| IPR004474      | 2.87  | 1     | 2.88 | 0    | 2 |
| PTHR23056      | 2.46  | 2.46  | 0    | 0    | 2 |
| PTHR22724      | 1.64  | 1.64  | 0    | 0    | 2 |
| IPR003745      | 1.46  | 0     | 1    | 1.6  | 2 |
| IPR007042      | 1.39  | 1.39  | 0    | 0    | 2 |
| PTHR22895      | 1.14  | 1.14  | 0    | 0    | 2 |
| IPR010891      | 1.17  | 1.33  | 1.16 | 0    | 2 |
| IPR000396      | 1.1   | 1.2   | 1    | 0    | 2 |
| PF12577        | 1.92  | 1.92  | 0    | 0    | 2 |
| PTHR13384      | 1.07  | 1.07  | 0    | 0    | 2 |
| PTHR18964:SF37 | 1     | 0     | 1    | 0    | 2 |
| IPR015369      | 1     | 1     | 0    | 0    | 2 |
| IPR015361      | 1     | 0     | 1    | 0    | 2 |
| IPR019467      | 1.15  | 1.15  | 0    | 0    | 2 |
| IPR019468      | 1.15  | 1.44  | 1.13 | 1    | 2 |
| IPR010282      | 1.04  | 0     | 1.04 | 0    | 2 |
| IPR014907      | 3     | 0     | 3    | 0    | 2 |
| IPR014908      | 1.69  | 1.69  | 0    | 0    | 2 |
| PF10914        | 1.65  | 1.68  | 1    | 0    | 2 |
| PF02078        | 2     | 2     | 0    | 0    | 2 |
| IPR007857      | 2.42  | 2.51  | 1    | 1    | 2 |
| IPR020220      | 1.2   | 0     | 1.2  | 0    | 2 |
| PTHR22724:SF1  | 1     | 1     | 0    | 0    | 2 |
| IPR009635      | 1.46  | 1.46  | 0    | 0    | 2 |
| IPR006718      | 14    | 14    | 0    | 0    | 2 |
| IPR006719      | 1.75  | 1.75  | 0    | 0    | 2 |
| IPR006716      | 1.3   | 1.32  | 1    | 0    | 2 |
| IPR006712      | 4.33  | 4.33  | 0    | 0    | 2 |
| IPR003748      | 1.72  | 0     | 1.52 | 2.33 | 2 |
| IPR007049      | 2.56  | 0     | 2.56 | 0    | 2 |
| IPR007048      | 2.1   | 1     | 2.11 | 1    | 2 |
| IPR007046      | 1.14  | 1     | 1.14 | 0    | 2 |
| IPR007044      | 1.19  | 1.5   | 1.17 | 0    | 2 |
| PF00256        | 1.08  | 1.33  | 1    | 2    | 2 |
| IPR008545      | 13    | 13    | 0    | 0    | 2 |
| IPR000218      | 1.15  | 2.43  | 1.01 | 1    | 2 |
| IPR000214      | 1.23  | 1.2   | 1.23 | 0    | 2 |
| IPR015752      | 1.25  | 1.25  | 0    | 0    | 2 |
| PF11643        | 4     | 4     | 0    | 0    | 2 |
| IPR010585      | 1.14  | 1.14  | 0    | 0    | 1 |
| IPR010581      | 1     | 0     | 1    | 1    | 1 |
| IPR010588      | 1.33  | 1.33  | 0    | 0    | 1 |
| IPR010630      | 79.25 | 79.25 | 0    | 0    | 1 |
| IPR007904      | 10.5  | 10.5  | 0    | 0    | 1 |
| IPR007905      | 1.98  | 2.1   | 1    | 0    | 1 |
| IPR005128      | 1.15  | 1.11  | 1.17 | 1.08 | 1 |
| IPR014003      | 2.38  | 2.38  | 0    | 0    | 1 |
| IPR010583      | 1.64  | 1     | 1.65 | 0    | 1 |
| IPR021722      | 1     | 0     | 1    | 0    | 1 |
| IPR021723      | 1.9   | 0     | 1.9  | 0    | 1 |
| IPR002472      | 2.17  | 2.17  | 0    | 0    | 1 |
| IPR021891      | 1.3   | 1.3   | 0    | 0    | 1 |
| IPR021895      | 1     | 1     | 0    | 0    | 1 |

|                |       |       |      |      |   |
|----------------|-------|-------|------|------|---|
| PTHR21075      | 1.06  | 0     | 1    | 1.14 | 1 |
| PTHR11405      | 1     | 0     | 1    | 0    | 1 |
| PF04388        | 1.39  | 1.39  | 0    | 0    | 1 |
| IPR006698      | 1.04  | 0     | 1.04 | 1    | 1 |
| PF09389        | 1.88  | 1.88  | 0    | 0    | 1 |
| PTHR18914      | 1.25  | 1.25  | 0    | 0    | 1 |
| PTHR12675      | 1.33  | 1.33  | 0    | 0    | 1 |
| IPR003469      | 1.24  | 1     | 1.26 | 1    | 1 |
| PTHR15892      | 1.12  | 1.12  | 0    | 0    | 1 |
| PTHR12320      | 1.57  | 1.57  | 0    | 0    | 1 |
| IPR004162      | 1.33  | 1.33  | 0    | 0    | 1 |
| IPR002786      | 1.03  | 1.1   | 1.03 | 1.04 | 1 |
| IPR002784      | 1.4   | 1.49  | 0    | 1    | 1 |
| PF11868        | 1     | 0     | 1    | 0    | 1 |
| TIGR01565      | 11.14 | 11.14 | 0    | 0    | 1 |
| PTHR21422:SF3  | 1.86  | 1.86  | 0    | 0    | 1 |
| PTHR19305      | 1     | 1     | 0    | 0    | 1 |
| PTHR21278      | 1.11  | 1.11  | 0    | 0    | 1 |
| TIGR02059      | 19    | 0     | 19   | 0    | 1 |
| PF09410        | 1.07  | 2.5   | 1.05 | 1    | 1 |
| IPR015325      | 1     | 0     | 1    | 0    | 1 |
| IPR021958      | 3.75  | 0     | 3.75 | 0    | 1 |
| IPR007635      | 3.17  | 3.17  | 0    | 0    | 1 |
| IPR007637      | 1     | 0     | 1    | 1    | 1 |
| IPR021914      | 3.43  | 3.43  | 0    | 0    | 1 |
| IPR021916      | 9.67  | 9.67  | 0    | 0    | 1 |
| IPR021910      | 1.73  | 1.73  | 0    | 0    | 1 |
| IPR021918      | 4.43  | 4.43  | 0    | 0    | 1 |
| IPR005542      | 2.66  | 2.66  | 0    | 0    | 1 |
| IPR013959      | 1     | 1     | 0    | 0    | 1 |
| IPR009282      | 1.21  | 0     | 1.21 | 0    | 1 |
| IPR014983      | 1.53  | 0     | 1.53 | 0    | 1 |
| IPR002906      | 1.26  | 1.41  | 0    | 1    | 1 |
| PTHR18898      | 1.56  | 1.56  | 0    | 0    | 1 |
| IPR004084      | 3     | 3     | 0    | 0    | 1 |
| IPR008659      | 1.13  | 1.13  | 0    | 0    | 1 |
| PTHR23319      | 1.33  | 1.33  | 0    | 0    | 1 |
| PTHR23316      | 3.38  | 3.38  | 0    | 0    | 1 |
| PTHR10178:SF10 | 26.8  | 26.8  | 0    | 0    | 1 |
| IPR006027      | 1.82  | 2.86  | 1.81 | 1    | 1 |
| IPR007771      | 1.18  | 0     | 1.18 | 0    | 1 |
| IPR003210      | 1.1   | 1.1   | 0    | 0    | 1 |
| PTHR12977:SF1  | 1.25  | 1.25  | 0    | 0    | 1 |
| IPR006796      | 3.55  | 3.55  | 0    | 0    | 1 |
| IPR006799      | 1.83  | 1.83  | 0    | 0    | 1 |
| IPR000744      | 2.96  | 3.05  | 1    | 0    | 1 |
| IPR000290      | 1.87  | 0     | 1.87 | 0    | 1 |
| IPR000298      | 2.16  | 4.67  | 1.88 | 1.07 | 1 |
| IPR021030      | 1.02  | 0     | 1.02 | 0    | 1 |
| IPR012481      | 1     | 0     | 1    | 0    | 1 |
| IPR012486      | 1.23  | 1.23  | 0    | 0    | 1 |
| IPR005661      | 1.35  | 0     | 1.36 | 1    | 1 |
| PTHR17695      | 1.04  | 1.04  | 0    | 0    | 1 |
| IPR015130      | 1.38  | 0     | 1.38 | 0    | 1 |
| IPR015132      | 2     | 2     | 0    | 0    | 1 |
| IPR022079      | 1.83  | 1.83  | 0    | 0    | 1 |
| IPR022070      | 2.33  | 2.33  | 0    | 0    | 1 |
| PTHR11076:SF2  | 1.08  | 1.08  | 0    | 0    | 1 |
| IPR013851      | 4.29  | 4.29  | 0    | 0    | 1 |
| IPR013859      | 1     | 1     | 0    | 0    | 1 |
| IPR007988      | 4.2   | 4.2   | 0    | 0    | 1 |
| IPR003158      | 1.24  | 0     | 1.24 | 0    | 1 |
| PF05817        | 1.24  | 1.25  | 0    | 1    | 1 |
| IPR003154      | 1.84  | 3.32  | 1.08 | 0    | 1 |
| IPR016624      | 1.46  | 1.22  | 1.52 | 1    | 1 |
| IPR012812      | 1     | 1     | 1    | 1    | 1 |
| IPR018912      | 1.68  | 0     | 1.68 | 0    | 1 |
| PTHR18895:SF2  | 1     | 0     | 1    | 0    | 1 |
| PF05646        | 1.12  | 1.12  | 0    | 0    | 1 |

|               |       |       |      |   |   |
|---------------|-------|-------|------|---|---|
| PTHR21564     | 1.73  | 1.73  | 0    | 0 | 1 |
| PTHR21383     | 1.09  | 1.09  | 0    | 0 | 1 |
| PTHR13872:SF2 | 1.11  | 1.11  | 0    | 0 | 1 |
| IPR003394     | 1.49  | 0     | 1.49 | 0 | 1 |
| PTHR15818     | 1.03  | 1.03  | 0    | 0 | 1 |
| IPR001820     | 2.39  | 2.68  | 1.14 | 0 | 1 |
| IPR013381     | 1.1   | 0     | 1.11 | 1 | 1 |
| IPR007258     | 1.52  | 1.52  | 0    | 0 | 1 |
| IPR013652     | 3     | 3     | 0    | 0 | 1 |
| IPR012386     | 1.12  | 1.19  | 1    | 1 | 1 |
| IPR008283     | 1.36  | 4.54  | 1.17 | 1 | 1 |
| PTHR10943     | 1     | 1     | 0    | 0 | 1 |
| IPR009772     | 1.18  | 1.18  | 1    | 0 | 1 |
| IPR009486     | 1.23  | 1.33  | 1.2  | 0 | 1 |
| IPR019518     | 2.5   | 2.8   | 1    | 0 | 1 |
| IPR019519     | 1.12  | 1.12  | 0    | 0 | 1 |
| IPR019514     | 1.45  | 1.45  | 0    | 0 | 1 |
| IPR006931     | 1.45  | 1.45  | 0    | 0 | 1 |
| PF10132       | 1     | 0     | 1    | 0 | 1 |
| IPR014839     | 1.38  | 1.38  | 0    | 0 | 1 |
| IPR014830     | 2.63  | 2.63  | 0    | 0 | 1 |
| PF11261       | 2.2   | 2.2   | 0    | 0 | 1 |
| IPR020317     | 1.03  | 0     | 1.03 | 0 | 1 |
| IPR015050     | 1.04  | 0     | 1.04 | 0 | 1 |
| PTHR21485     | 1     | 0     | 1    | 0 | 1 |
| PTHR21489     | 1     | 1     | 0    | 0 | 1 |
| PF09975       | 1.03  | 0     | 1.03 | 1 | 1 |
| IPR015417     | 3.58  | 0     | 3.58 | 0 | 1 |
| IPR021999     | 2.57  | 2.57  | 0    | 0 | 1 |
| IPR021992     | 1.32  | 0     | 1.32 | 0 | 1 |
| IPR007864     | 1.15  | 0     | 1.15 | 1 | 1 |
| IPR010824     | 1.01  | 0     | 1.01 | 0 | 1 |
| PTHR12176     | 1.41  | 1.76  | 1.2  | 0 | 1 |
| IPR019233     | 1.05  | 0     | 1.06 | 1 | 1 |
| IPR019230     | 1.04  | 0     | 1.04 | 0 | 1 |
| IPR005350     | 1.57  | 0     | 1.57 | 0 | 1 |
| IPR018545     | 1.69  | 1.69  | 0    | 0 | 1 |
| IPR009523     | 2.83  | 2.83  | 0    | 0 | 1 |
| IPR009528     | 1     | 0     | 1    | 0 | 1 |
| IPR002516     | 2.44  | 7.3   | 1.42 | 1 | 1 |
| PTHR23427     | 1.33  | 0     | 1.33 | 0 | 1 |
| TIGR01447     | 1     | 0     | 1    | 0 | 1 |
| IPR006873     | 10.71 | 12.33 | 1    | 0 | 1 |
| IPR019526     | 1.37  | 1.37  | 0    | 0 | 1 |
| IPR019038     | 1.58  | 1.58  | 0    | 0 | 1 |
| IPR019783     | 1.35  | 1.58  | 0    | 1 | 1 |
| PTHR21678     | 1.27  | 1.27  | 0    | 0 | 1 |
| IPR018783     | 1.78  | 1.8   | 0    | 1 | 1 |
| IPR008900     | 1.34  | 1     | 1.38 | 1 | 1 |
| IPR010324     | 1     | 0     | 1    | 1 | 1 |
| IPR000465     | 1.89  | 1.91  | 1    | 0 | 1 |
| PTHR19265     | 1.33  | 1.33  | 0    | 0 | 1 |
| IPR013147     | 2.14  | 2.14  | 0    | 0 | 1 |
| IPR013146     | 4.83  | 4.83  | 0    | 0 | 1 |
| PD117379      | 1.02  | 0     | 1.02 | 0 | 1 |
| IPR008592     | 3     | 0     | 3    | 0 | 1 |
| IPR005143     | 2.42  | 1     | 2.42 | 0 | 1 |
| IPR018998     | 2.03  | 2.07  | 1    | 0 | 1 |
| IPR009319     | 1.18  | 0     | 1.18 | 0 | 1 |
| IPR009318     | 6.95  | 6.95  | 0    | 0 | 1 |
| IPR009317     | 1.14  | 0     | 1.14 | 1 | 1 |
| PF11699       | 1.23  | 1.23  | 1.25 | 0 | 1 |
| PD015242      | 2     | 2     | 0    | 0 | 1 |
| PTHR22655     | 2     | 2     | 0    | 0 | 1 |
| PTHR22652     | 1.6   | 1.6   | 0    | 0 | 1 |
| IPR003317     | 1.56  | 1     | 1.56 | 1 | 1 |
| IPR003319     | 1.32  | 1.67  | 1    | 0 | 1 |
| PTHR12277:SF9 | 1.1   | 1.17  | 1.07 | 0 | 1 |
| IPR000663     | 3.67  | 3.67  | 0    | 0 | 1 |



|                |      |      |      |      |   |
|----------------|------|------|------|------|---|
| IPR001209      | 1.21 | 2.16 | 1.12 | 1.02 | 1 |
| IPR021285      | 1    | 0    | 1    | 0    | 1 |
| IPR021280      | 1.31 | 2    | 1.27 | 0    | 1 |
| PTHR16048      | 2.47 | 2.47 | 0    | 0    | 1 |
| PF06296        | 1.31 | 0    | 1.31 | 0    | 1 |
| IPR015075      | 1.08 | 1.2  | 1.05 | 0    | 1 |
| IPR015076      | 2    | 2    | 0    | 0    | 1 |
| IPR021826      | 1    | 0    | 1    | 0    | 1 |
| IPR019062      | 1    | 0    | 1    | 0    | 1 |
| IPR003783      | 1.12 | 1.56 | 1.12 | 0    | 1 |
| PTHR14885      | 1.15 | 1.15 | 0    | 0    | 1 |
| IPR012911      | 3.19 | 3.19 | 0    | 0    | 1 |
| PTHR15741:SF15 | 1    | 1    | 0    | 0    | 1 |
| PF11959        | 1.09 | 0    | 1.1  | 1    | 1 |
| PTHR21405      | 1    | 1    | 1    | 0    | 1 |
| IPR022136      | 1.75 | 1.75 | 0    | 0    | 1 |
| IPR022135      | 4.5  | 4.5  | 0    | 0    | 1 |
| IPR022132      | 1.24 | 1.24 | 0    | 0    | 1 |
| IPR022130      | 4    | 4    | 0    | 0    | 1 |
| PF04250        | 1.01 | 0    | 1.01 | 1    | 1 |
| IPR002840      | 1.11 | 1.2  | 1.21 | 1.03 | 1 |
| IPR020989      | 1.6  | 1.6  | 0    | 0    | 1 |
| IPR020988      | 1.06 | 1    | 1.04 | 1.36 | 1 |
| IPR020980      | 1    | 0    | 1    | 0    | 1 |
| IPR020983      | 5    | 5    | 0    | 0    | 1 |
| IPR003502      | 4.09 | 4.09 | 0    | 0    | 1 |
| IPR006481      | 1.42 | 0    | 1.42 | 0    | 1 |
| IPR006487      | 1.91 | 1    | 1.92 | 0    | 1 |
| IPR007359      | 1.07 | 0    | 1.07 | 0    | 1 |
| IPR007353      | 1.78 | 1    | 1.79 | 1    | 1 |
| IPR007357      | 1.01 | 0    | 1.01 | 1    | 1 |
| IPR012643      | 1.57 | 1.57 | 0    | 0    | 1 |
| PF12548        | 1.78 | 1.78 | 0    | 0    | 1 |
| PTHR13407      | 1.33 | 1.33 | 0    | 0    | 1 |
| IPR002661      | 1.04 | 1.34 | 1.02 | 0    | 1 |
| PF12476        | 1.08 | 0    | 1.09 | 1    | 1 |
| PD102989       | 1    | 0    | 1    | 0    | 1 |
| PTHR15491      | 1    | 1    | 0    | 0    | 1 |
| PTHR13895      | 1    | 1    | 0    | 0    | 1 |
| PF03318        | 2.64 | 2.33 | 4    | 0    | 1 |
| PF03316        | 2    | 0    | 2    | 0    | 1 |
| PTHR20957      | 1.35 | 1.35 | 0    | 0    | 1 |
| PF08009        | 1.02 | 0    | 1.02 | 0    | 1 |
| PTHR23110:SF20 | 1.12 | 1.12 | 0    | 0    | 1 |
| IPR018702      | 1.21 | 1    | 1.21 | 1.29 | 1 |
| TIGR02688      | 1    | 0    | 1    | 1    | 1 |
| TIGR02682      | 1.08 | 0    | 1.1  | 1    | 1 |
| IPR021656      | 1.75 | 1.75 | 0    | 0    | 1 |
| IPR021657      | 1    | 0    | 1    | 0    | 1 |
| IPR011499      | 1.27 | 0    | 1.27 | 0    | 1 |
| IPR005809      | 1    | 1    | 1    | 0    | 1 |
| IPR010542      | 3.09 | 3.09 | 0    | 0    | 1 |
| IPR000975      | 8.5  | 8.5  | 0    | 0    | 1 |
| IPR006726      | 2.34 | 1.5  | 2.38 | 0    | 1 |
| IPR006723      | 1.9  | 1.9  | 0    | 0    | 1 |
| IPR003775      | 1.11 | 0    | 1.11 | 0    | 1 |
| IPR003770      | 1.07 | 0    | 1.07 | 0    | 1 |
| IPR001737      | 1.18 | 1.28 | 1.15 | 1    | 1 |
| IPR017932      | 1.17 | 1    | 1.05 | 1.55 | 1 |
| IPR017939      | 1.46 | 1.86 | 1    | 0    | 1 |
| IPR016041      | 2.03 | 0    | 1.76 | 2.54 | 1 |
| IPR015897      | 8.65 | 8.65 | 0    | 0    | 1 |
| IPR013729      | 1.29 | 1.29 | 0    | 0    | 1 |
| PTHR16288      | 1.2  | 1.2  | 0    | 0    | 1 |
| PTHR15245:SF3  | 1    | 1    | 0    | 0    | 1 |
| PTHR15245:SF4  | 1    | 1    | 0    | 0    | 1 |
| PF05481        | 2.25 | 0    | 2.25 | 0    | 1 |
| IPR009395      | 1.14 | 1.14 | 0    | 0    | 1 |
| IPR009398      | 3.46 | 3.46 | 0    | 0    | 1 |

|                |      |      |      |      |   |
|----------------|------|------|------|------|---|
| PF12353        | 1.62 | 1.62 | 0    | 0    | 1 |
| PF11612        | 1.1  | 1    | 1.11 | 0    | 1 |
| PF11619        | 1.22 | 1.22 | 0    | 0    | 1 |
| PTHR13610      | 1.32 | 2    | 1    | 1.14 | 1 |
| PTHR10887:SF17 | 1.94 | 1.94 | 0    | 0    | 1 |
| PTHR21579:SF9  | 1.09 | 1.09 | 0    | 0    | 1 |
| IPR010602      | 1.05 | 0    | 1.05 | 0    | 1 |
| IPR010608      | 2.67 | 2.67 | 0    | 0    | 1 |
| IPR022189      | 3    | 3    | 0    | 0    | 1 |
| IPR013893      | 1.06 | 1.06 | 0    | 0    | 1 |
| IPR018638      | 1.17 | 1    | 1.16 | 1.33 | 1 |
| IPR001531      | 1.75 | 1    | 1.85 | 1.14 | 1 |
| TIGR00238      | 1    | 1    | 1    | 0    | 1 |
| PTHR21020      | 1.31 | 1.31 | 0    | 0    | 1 |
| PTHR10052:SF2  | 4.71 | 4.71 | 0    | 0    | 1 |
| IPR011710      | 1.3  | 1.3  | 0    | 0    | 1 |
| IPR002160      | 7    | 7    | 0    | 0    | 1 |
| PTHR22208      | 1.18 | 1.18 | 0    | 0    | 1 |
| IPR009846      | 1.11 | 1.11 | 0    | 0    | 1 |
| IPR015495      | 1.43 | 1.43 | 0    | 0    | 1 |
| IPR006395      | 2.04 | 2    | 2.05 | 2    | 1 |
| IPR012996      | 4    | 4    | 0    | 0    | 1 |
| PTHR18929      | 1.89 | 1.89 | 0    | 0    | 1 |
| IPR004130      | 2.47 | 3.17 | 2.12 | 1.22 | 1 |
| IPR004134      | 1.48 | 1.46 | 1.5  | 0    | 1 |
| PTHR13138      | 1.27 | 1.27 | 0    | 0    | 1 |
| IPR019304      | 1    | 1    | 1    | 1    | 1 |
| IPR019303      | 1.79 | 1    | 1.8  | 0    | 1 |
| PTHR15507:SF1  | 1.25 | 1.25 | 0    | 0    | 1 |
| IPR009455      | 1.5  | 1.5  | 0    | 0    | 1 |
| PF11795        | 1    | 0    | 1    | 0    | 1 |
| PF11794        | 1.36 | 0    | 1.26 | 2.25 | 1 |
| IPR011058      | 2.57 | 2.88 | 1.6  | 0    | 1 |
| IPR014263      | 1.2  | 0    | 1.2  | 0    | 1 |
| PF11423        | 1    | 0    | 1    | 0    | 1 |
| PTHR23088      | 1.16 | 1.6  | 1    | 0    | 1 |
| IPR009246      | 1.08 | 0    | 1.08 | 0    | 1 |
| IPR009242      | 1.31 | 0    | 1.31 | 0    | 1 |
| PTHR15950:SF1  | 1    | 1    | 0    | 0    | 1 |
| IPR007607      | 1.59 | 0    | 1.6  | 1.31 | 1 |
| IPR007606      | 3.71 | 1    | 4.17 | 0    | 1 |
| IPR000054      | 1.35 | 1.57 | 0    | 1    | 1 |
| PTHR10891:SF40 | 1    | 1    | 1    | 0    | 1 |
| IPR013592      | 5    | 5    | 0    | 0    | 1 |
| IPR013599      | 1.91 | 1.91 | 0    | 0    | 1 |
| IPR019140      | 1.42 | 1.42 | 0    | 0    | 1 |
| IPR019144      | 1.46 | 1.46 | 0    | 0    | 1 |
| IPR019147      | 2.53 | 2.53 | 0    | 0    | 1 |
| IPR018816      | 1.25 | 1.25 | 0    | 0    | 1 |
| IPR019490      | 1.02 | 0    | 1    | 1.06 | 1 |
| PTHR10684      | 1    | 1    | 0    | 0    | 1 |
| IPR005570      | 1.14 | 1.14 | 0    | 0    | 1 |
| IPR003930      | 3.11 | 3.11 | 0    | 0    | 1 |
| IPR011526      | 1.83 | 1.83 | 0    | 0    | 1 |
| IPR011522      | 1.27 | 0    | 1.27 | 0    | 1 |
| PF12568        | 1    | 0    | 1    | 0    | 1 |
| PTHR11224      | 1    | 1    | 0    | 0    | 1 |
| PTHR11223      | 1.67 | 1.67 | 0    | 0    | 1 |
| PTHR18937:SF10 | 1.17 | 1.5  | 1    | 1.17 | 1 |
| IPR004603      | 1.16 | 0    | 1.16 | 1    | 1 |
| PTHR13815      | 1.14 | 1.14 | 0    | 0    | 1 |
| IPR004307      | 1.28 | 1.49 | 1.23 | 1.11 | 1 |
| PTHR13589:SF5  | 1.12 | 1.12 | 0    | 0    | 1 |
| TIGR03557      | 1    | 0    | 1    | 0    | 1 |
| PTHR13029:SF2  | 1    | 1    | 0    | 0    | 1 |
| PTHR21079:SF1  | 1.86 | 1.86 | 0    | 0    | 1 |
| PTHR21079:SF2  | 1.44 | 1.44 | 0    | 0    | 1 |
| IPR007015      | 1.5  | 1.5  | 0    | 0    | 1 |
| IPR000791      | 1.41 | 2.97 | 1.09 | 1.23 | 1 |

|                |      |      |      |      |   |
|----------------|------|------|------|------|---|
| PF09540        | 2.11 | 0    | 2.11 | 0    | 1 |
| IPR015810      | 1    | 0    | 1    | 0    | 1 |
| IPR012452      | 2.78 | 0    | 2.78 | 0    | 1 |
| IPR009648      | 1.05 | 0    | 1.05 | 0    | 1 |
| PF12469        | 1.11 | 0    | 1.02 | 1.31 | 1 |
| PF12465        | 1.6  | 1.6  | 0    | 0    | 1 |
| PF12466        | 1    | 0    | 1    | 0    | 1 |
| IPR022023      | 1.19 | 1.19 | 0    | 0    | 1 |
| IPR022026      | 1.23 | 0    | 1.23 | 1.33 | 1 |
| IPR004895      | 3.44 | 3.44 | 0    | 0    | 1 |
| IPR004890      | 2.17 | 0    | 2.17 | 0    | 1 |
| IPR015109      | 1    | 0    | 1    | 0    | 1 |
| IPR015103      | 1.86 | 0    | 1.86 | 0    | 1 |
| IPR015106      | 7    | 0    | 7    | 0    | 1 |
| IPR013886      | 1.2  | 1.2  | 0    | 0    | 1 |
| IPR013889      | 1.04 | 1.04 | 1    | 0    | 1 |
| IPR012861      | 1.08 | 0    | 1.07 | 1.14 | 1 |
| IPR012860      | 1.53 | 1.53 | 0    | 0    | 1 |
| IPR020086      | 1    | 0    | 1    | 0    | 1 |
| PTHR18968:SF3  | 1    | 0    | 1    | 0    | 1 |
| IPR021757      | 1.12 | 1.12 | 0    | 0    | 1 |
| IPR022222      | 1.9  | 0    | 1.9  | 0    | 1 |
| IPR022223      | 1    | 0    | 1    | 0    | 1 |
| IPR022221      | 1    | 0    | 1    | 0    | 1 |
| PTHR13878:SF1  | 1    | 0    | 1    | 0    | 1 |
| PTHR21538      | 1.25 | 1.25 | 0    | 0    | 1 |
| IPR008866      | 1.66 | 0    | 1.66 | 0    | 1 |
| IPR008869      | 1.2  | 1    | 1.2  | 0    | 1 |
| IPR003430      | 3.03 | 0    | 3.21 | 1.8  | 1 |
| IPR007224      | 1.04 | 1.04 | 0    | 0    | 1 |
| IPR000167      | 8.89 | 8.89 | 0    | 0    | 1 |
| IPR019382      | 1.37 | 1.37 | 0    | 0    | 1 |
| IPR021255      | 1.78 | 2    | 1.79 | 1    | 1 |
| PTHR12270:SF1  | 3.2  | 3.2  | 0    | 0    | 1 |
| PTHR10997      | 1.12 | 1.12 | 0    | 0    | 1 |
| IPR018476      | 1.05 | 0    | 1.06 | 1    | 1 |
| IPR018478      | 1.01 | 0    | 1.01 | 0    | 1 |
| PF11710        | 2.07 | 2.07 | 0    | 0    | 1 |
| PTHR23116:SF4  | 1    | 1    | 0    | 0    | 1 |
| IPR006906      | 1.49 | 1.49 | 0    | 0    | 1 |
| IPR006909      | 1.92 | 1.92 | 0    | 0    | 1 |
| IPR010727      | 1.65 | 0    | 1.65 | 0    | 1 |
| IPR010724      | 1.61 | 0    | 1.61 | 0    | 1 |
| PTHR12439      | 1    | 1    | 0    | 0    | 1 |
| IPR020322      | 1    | 0    | 1    | 1    | 1 |
| PTHR11206:SF7  | 1    | 0    | 1    | 1    | 1 |
| PF08319        | 1.15 | 1.15 | 0    | 0    | 1 |
| IPR021499      | 1    | 0    | 1    | 0    | 1 |
| IPR009960      | 1.2  | 1.2  | 0    | 0    | 1 |
| IPR007524      | 5.17 | 5.17 | 0    | 0    | 1 |
| IPR007521      | 1.52 | 1.52 | 0    | 0    | 1 |
| IPR007523      | 1.12 | 1.42 | 1.02 | 1.11 | 1 |
| IPR000554      | 1.54 | 1.54 | 0    | 0    | 1 |
| IPR000557      | 8.33 | 8.29 | 10   | 0    | 1 |
| IPR000552      | 1.23 | 1.39 | 0    | 1    | 1 |
| IPR010872      | 2.7  | 0    | 2.7  | 0    | 1 |
| IPR010870      | 1.8  | 0    | 1.8  | 0    | 1 |
| PTHR12203:SF12 | 1    | 1    | 0    | 0    | 1 |
| PTHR12147      | 1.43 | 1.43 | 0    | 0    | 1 |
| PTHR23125:SF18 | 1.29 | 1.29 | 0    | 0    | 1 |
| IPR019262      | 1.12 | 0    | 1.12 | 0    | 1 |
| IPR019264      | 3.06 | 0    | 3.1  | 1.25 | 1 |
| IPR019269      | 1.22 | 1.26 | 1    | 0    | 1 |
| IPR015025      | 1.93 | 0    | 1.93 | 0    | 1 |
| IPR004925      | 1.36 | 0    | 1.26 | 2.23 | 1 |
| IPR009558      | 1.04 | 0    | 1.04 | 0    | 1 |
| IPR009554      | 1.09 | 0    | 1.09 | 0    | 1 |
| IPR002566      | 5.5  | 0    | 5.5  | 0    | 1 |
| IPR013612      | 3.1  | 3.1  | 0    | 0    | 1 |

|                |       |       |      |      |   |
|----------------|-------|-------|------|------|---|
| IPR010111      | 1.11  | 1.11  | 0    | 0    | 1 |
| PTHR14488      | 1.2   | 1.2   | 0    | 0    | 1 |
| PTHR21143      | 1.29  | 1.29  | 0    | 0    | 1 |
| PTHR10992:SF22 | 1.06  | 1.1   | 1    | 0    | 1 |
| PF09760        | 1.16  | 1.16  | 0    | 0    | 1 |
| IPR020795      | 1.08  | 1.08  | 0    | 0    | 1 |
| IPR007724      | 1.84  | 1.86  | 1    | 0    | 1 |
| IPR007725      | 1.3   | 1.3   | 0    | 0    | 1 |
| IPR001443      | 5.23  | 0     | 5.23 | 0    | 1 |
| IPR001442      | 6.12  | 6.12  | 0    | 0    | 1 |
| IPR021043      | 1.4   | 1.4   | 0    | 0    | 1 |
| IPR005638      | 1     | 1     | 1    | 0    | 1 |
| IPR005639      | 1.11  | 1     | 1.12 | 0    | 1 |
| PF04712        | 2.52  | 2.52  | 0    | 0    | 1 |
| IPR000456      | 1.05  | 1.41  | 1.02 | 0    | 1 |
| PF06710        | 1     | 0     | 1    | 0    | 1 |
| IPR016097      | 1.06  | 0     | 1.06 | 0    | 1 |
| IPR004226      | 1.41  | 1.41  | 0    | 0    | 1 |
| IPR005173      | 2.09  | 2.09  | 0    | 0    | 1 |
| PTHR13006      | 2.32  | 2.32  | 0    | 0    | 1 |
| IPR008035      | 1     | 0     | 1    | 0    | 1 |
| PF10064        | 1.02  | 0     | 1.02 | 0    | 1 |
| PTHR22621      | 1.67  | 1.67  | 0    | 0    | 1 |
| TIGR00407      | 1     | 1     | 0    | 0    | 1 |
| IPR019325      | 1.37  | 1.37  | 0    | 0    | 1 |
| IPR006979      | 1.37  | 0     | 0    | 1.37 | 1 |
| TIGR03170      | 1.01  | 0     | 1.01 | 0    | 1 |
| PTHR11624:SF20 | 1     | 1     | 1    | 0    | 1 |
| TIGR02469      | 1     | 0     | 1    | 1    | 1 |
| PD319978       | 1.75  | 1.75  | 0    | 0    | 1 |
| IPR006645      | 1.3   | 1.5   | 1.31 | 1    | 1 |
| IPR007115      | 1.3   | 1.11  | 1.32 | 1.17 | 1 |
| PF06559        | 1.03  | 1     | 1.03 | 1    | 1 |
| PTHR14791      | 1.83  | 1.83  | 0    | 0    | 1 |
| IPR013681      | 4     | 4     | 0    | 0    | 1 |
| IPR012558      | 1.5   | 0     | 1.5  | 0    | 1 |
| IPR009726      | 1.21  | 0     | 1.21 | 0    | 1 |
| IPR009720      | 1.75  | 0     | 0    | 1.75 | 1 |
| IPR001253      | 1.37  | 1.42  | 0    | 1.26 | 1 |
| PD019840       | 1.33  | 1.33  | 0    | 0    | 1 |
| PTHR10910      | 2.92  | 2.92  | 0    | 0    | 1 |
| IPR015026      | 1     | 0     | 1    | 0    | 1 |
| IPR019566      | 1.2   | 1.2   | 0    | 0    | 1 |
| IPR015024      | 2     | 0     | 2    | 0    | 1 |
| IPR006984      | 1.27  | 1.33  | 0    | 1    | 1 |
| PTHR11799      | 1.33  | 1.43  | 1    | 0    | 1 |
| IPR003802      | 1.02  | 0     | 1.02 | 0    | 1 |
| IPR003801      | 1.07  | 0     | 1.07 | 1.04 | 1 |
| PTHR11133      | 1     | 0     | 1    | 1    | 1 |
| PTHR11132      | 3.06  | 3.06  | 0    | 0    | 1 |
| IPR006701      | 1.29  | 1     | 1.29 | 0    | 1 |
| IPR012940      | 5.57  | 5.57  | 0    | 0    | 1 |
| IPR012942      | 1.52  | 1.52  | 0    | 0    | 1 |
| PF02757        | 53.67 | 53.67 | 0    | 0    | 1 |
| PTHR22128      | 1     | 1     | 0    | 0    | 1 |
| PTHR12786:SF1  | 1.08  | 1.08  | 0    | 0    | 1 |
| IPR022147      | 1.15  | 1.75  | 1.12 | 0    | 1 |
| TIGR02511      | 1     | 0     | 1    | 0    | 1 |
| IPR007076      | 1.13  | 1     | 1.13 | 1    | 1 |
| IPR007838      | 1.04  | 1     | 1.04 | 0    | 1 |
| IPR007832      | 1.26  | 1.28  | 0    | 1    | 1 |
| PTHR13532      | 1.41  | 1.41  | 0    | 0    | 1 |
| IPR015282      | 10    | 0     | 10   | 0    | 1 |
| IPR019707      | 1.71  | 0     | 2.25 | 1    | 1 |
| IPR001930      | 1     | 1     | 1    | 0    | 1 |
| PF07031        | 1.01  | 1     | 1.01 | 0    | 1 |
| IPR007307      | 1.1   | 1.1   | 0    | 0    | 1 |
| IPR007308      | 1.12  | 1.13  | 1    | 0    | 1 |
| IPR007309      | 1.25  | 1.29  | 0    | 1    | 1 |

|                |      |      |      |      |   |
|----------------|------|------|------|------|---|
| IPR001684      | 1.04 | 1.37 | 1.02 | 0    | 1 |
| IPR001689      | 1.06 | 0    | 1.06 | 0    | 1 |
| IPR008687      | 1.33 | 0    | 1.33 | 0    | 1 |
| IPR005309      | 1    | 0    | 1    | 0    | 1 |
| IPR018539      | 5.6  | 5.6  | 0    | 0    | 1 |
| IPR018531      | 1.35 | 1.41 | 1.33 | 0    | 1 |
| PF12598        | 3    | 3    | 0    | 0    | 1 |
| PTHR13451      | 1.14 | 1.14 | 0    | 0    | 1 |
| PF11587        | 4.33 | 4.33 | 0    | 0    | 1 |
| IPR006826      | 2.2  | 0    | 2.2  | 0    | 1 |
| IPR006820      | 3.83 | 3.83 | 0    | 0    | 1 |
| IPR006821      | 8    | 8    | 0    | 0    | 1 |
| IPR006828      | 1.98 | 1.98 | 0    | 0    | 1 |
| MF_00811       | 1.01 | 1    | 1.01 | 0    | 1 |
| PF11009        | 1.02 | 0    | 1.02 | 0    | 1 |
| PTHR12266      | 1.69 | 1.69 | 0    | 0    | 1 |
| PTHR23224:SF31 | 1.67 | 1.67 | 0    | 0    | 1 |
| PTHR10183:SF18 | 1    | 1    | 0    | 0    | 1 |
| PTHR21626      | 1.31 | 1.31 | 0    | 0    | 1 |
| IPR018739      | 1.64 | 0    | 1.66 | 1    | 1 |
| IPR015276      | 1.33 | 1.33 | 0    | 0    | 1 |
| IPR015275      | 1.86 | 1.86 | 0    | 0    | 1 |
| IPR010351      | 2.43 | 0    | 2.43 | 0    | 1 |
| IPR010357      | 1.57 | 1.57 | 0    | 0    | 1 |
| IPR002853      | 1.15 | 1.17 | 0    | 1    | 1 |
| IPR003188      | 2.33 | 0    | 2.33 | 0    | 1 |
| IPR003186      | 2.03 | 2.03 | 0    | 0    | 1 |
| IPR003185      | 1.9  | 1.9  | 0    | 0    | 1 |
| IPR003183      | 1.24 | 0    | 0    | 1.24 | 1 |
| IPR016014      | 2.11 | 2.11 | 0    | 0    | 1 |
| IPR016015      | 2.33 | 2.33 | 0    | 0    | 1 |
| IPR016018      | 1.67 | 0    | 1.67 | 0    | 1 |
| IPR016019      | 1.33 | 0    | 1.33 | 0    | 1 |
| IPR017942      | 6.59 | 6.59 | 0    | 0    | 1 |
| PTHR10578      | 1.12 | 2    | 1.1  | 1    | 1 |
| PF12367        | 1.08 | 0    | 1.06 | 1.12 | 1 |
| IPR011120      | 1.41 | 1.42 | 1    | 0    | 1 |
| PTHR11624      | 1    | 1    | 1    | 1    | 1 |
| IPR010650      | 1.09 | 0    | 1.07 | 1.83 | 1 |
| IPR010651      | 1.62 | 1.33 | 1.63 | 0    | 1 |
| IPR005138      | 1.33 | 0    | 1.33 | 0    | 1 |
| TIGR02229      | 1.15 | 0    | 1.15 | 0    | 1 |
| TIGR02917      | 1.11 | 0    | 1.11 | 0    | 1 |
| PTHR10483:SF4  | 9.71 | 9.71 | 0    | 0    | 1 |
| PTHR13681:SF2  | 1.5  | 1.5  | 0    | 0    | 1 |
| IPR001569      | 1.37 | 1.6  | 0    | 1    | 1 |
| IPR021120      | 1.31 | 1    | 1.31 | 1    | 1 |
| PTHR22093      | 1.1  | 1.1  | 0    | 0    | 1 |
| IPR019650      | 1.06 | 0    | 1.06 | 0    | 1 |
| IPR021782      | 3.07 | 0    | 3.07 | 0    | 1 |
| IPR021875      | 1    | 1    | 0    | 0    | 1 |
| IPR021873      | 1    | 0    | 1    | 0    | 1 |
| IPR021871      | 1    | 1    | 1    | 0    | 1 |
| PF11858        | 1    | 0    | 1    | 0    | 1 |
| IPR002136      | 1.15 | 2.49 | 1.02 | 1    | 1 |
| IPR007411      | 1.03 | 0    | 1.03 | 0    | 1 |
| IPR007415      | 1.41 | 0    | 1.41 | 0    | 1 |
| IPR009200      | 1.2  | 0    | 1.18 | 3    | 1 |
| PTHR12389      | 1.16 | 1.16 | 0    | 0    | 1 |
| IPR008774      | 4.64 | 4.64 | 0    | 0    | 1 |
| IPR008778      | 1.66 | 1.63 | 1.7  | 1    | 1 |
| PTHR22707      | 1.5  | 1.5  | 0    | 0    | 1 |
| PTHR23224:SF46 | 1.44 | 1.44 | 0    | 0    | 1 |
| PF07034        | 1.33 | 1.33 | 0    | 0    | 1 |
| IPR007301      | 1.67 | 0    | 1.2  | 2.25 | 1 |
| IPR003683      | 1.13 | 1.62 | 1    | 0    | 1 |
| IPR003684      | 3.22 | 0    | 3.22 | 0    | 1 |
| IPR007652      | 3.55 | 3.89 | 1.25 | 0    | 1 |
| IPR007653      | 1.41 | 1.41 | 0    | 0    | 1 |

|                |       |       |      |      |   |
|----------------|-------|-------|------|------|---|
| IPR007651      | 1.59  | 1.59  | 0    | 0    | 1 |
| IPR007383      | 1.22  | 1     | 1.22 | 0    | 1 |
| IPR013527      | 1.02  | 1     | 1.02 | 0    | 1 |
| PTHR13369      | 1.04  | 1.12  | 1    | 0    | 1 |
| IPR008822      | 1.52  | 1     | 1.53 | 0    | 1 |
| IPR018827      | 2.07  | 2.07  | 0    | 0    | 1 |
| IPR004658      | 1.4   | 0     | 1.4  | 0    | 1 |
| IPR005520      | 3.77  | 3.77  | 0    | 0    | 1 |
| IPR005521      | 5.25  | 5.25  | 0    | 0    | 1 |
| IPR005527      | 1.05  | 2     | 1.03 | 0    | 1 |
| IPR015345      | 4.27  | 11.29 | 1    | 0    | 1 |
| IPR010442      | 4.27  | 4.27  | 0    | 0    | 1 |
| PTHR10108      | 1.03  | 1.14  | 1    | 1    | 1 |
| IPR010449      | 1.87  | 1.87  | 0    | 0    | 1 |
| IPR018319      | 1.17  | 1     | 1.18 | 1    | 1 |
| MF_01148       | 1     | 0     | 1    | 0    | 1 |
| IPR014925      | 1.35  | 0     | 1.35 | 1.33 | 1 |
| PTHR11276      | 1     | 1     | 1    | 0    | 1 |
| PF07570        | 1     | 0     | 1    | 0    | 1 |
| IPR003090      | 2.15  | 2.15  | 0    | 0    | 1 |
| IPR003093      | 3.08  | 3.27  | 1    | 0    | 1 |
| PTHR10845      | 1     | 1     | 0    | 0    | 1 |
| PTHR20985      | 1.07  | 1.07  | 0    | 0    | 1 |
| IPR020240      | 1.03  | 0     | 1.03 | 0    | 1 |
| PF05545        | 1.12  | 0     | 1.12 | 0    | 1 |
| PTHR22930      | 4.64  | 4.74  | 2    | 0    | 1 |
| IPR006080      | 10.88 | 10.88 | 0    | 0    | 1 |
| IPR006081      | 1.33  | 1.33  | 0    | 0    | 1 |
| IPR010933      | 9.45  | 9.45  | 0    | 0    | 1 |
| IPR010931      | 2.67  | 0     | 2.67 | 0    | 1 |
| PTHR11133:SF2  | 1     | 0     | 1    | 0    | 1 |
| IPR000903      | 2.89  | 2.92  | 1    | 0    | 1 |
| PTHR13457      | 1     | 1     | 0    | 0    | 1 |
| PTHR10044:SF7  | 1.86  | 1.86  | 0    | 0    | 1 |
| PTHR10044:SF8  | 2.86  | 2.86  | 0    | 0    | 1 |
| PF07332        | 1.22  | 1     | 1.23 | 0    | 1 |
| PTHR16453      | 1     | 1     | 0    | 0    | 1 |
| IPR009619      | 1.04  | 1     | 1.05 | 0    | 1 |
| IPR009611      | 1.25  | 1.25  | 0    | 0    | 1 |
| IPR012425      | 1.52  | 1     | 1.53 | 1    | 1 |
| PTHR10997:SF18 | 3.5   | 3.5   | 0    | 0    | 1 |
| IPR022016      | 1.11  | 1     | 1.12 | 0    | 1 |
| IPR011215      | 1     | 0     | 1    | 0    | 1 |
| PTHR13660      | 1.13  | 1.13  | 0    | 0    | 1 |
| PF05387        | 2.31  | 2     | 0    | 3.67 | 1 |
| PF10259        | 1.1   | 1.1   | 0    | 0    | 1 |
| PD049902       | 1.29  | 0     | 1.29 | 0    | 1 |
| IPR021882      | 2.33  | 0     | 2.33 | 0    | 1 |
| TIGR03486      | 1     | 0     | 1    | 0    | 1 |
| TIGR03485      | 1.14  | 0     | 1.14 | 0    | 1 |
| IPR021706      | 1     | 1     | 0    | 0    | 1 |
| IPR009560      | 1.14  | 0     | 1.14 | 0    | 1 |
| IPR005956      | 1.28  | 1.56  | 1    | 0    | 1 |
| IPR008853      | 1.93  | 1.93  | 0    | 0    | 1 |
| IPR009890      | 1.32  | 1.32  | 0    | 0    | 1 |
| IPR009899      | 1.28  | 0     | 1.28 | 0    | 1 |
| IPR010017      | 1.05  | 0     | 1.05 | 1    | 1 |
| PF09670        | 1.3   | 0     | 1.37 | 1    | 1 |
| IPR006541      | 1.76  | 0     | 1.76 | 0    | 1 |
| IPR007498      | 2.98  | 3.57  | 2.96 | 0    | 1 |
| IPR007493      | 32.86 | 32.86 | 0    | 0    | 1 |
| IPR007494      | 1.05  | 0     | 1.05 | 0    | 1 |
| IPR007496      | 1.17  | 2.67  | 1.04 | 0    | 1 |
| PTHR12306      | 1.12  | 1.12  | 0    | 0    | 1 |
| IPR004142      | 3.6   | 4.22  | 1.11 | 0    | 1 |
| IPR004145      | 22.73 | 22.73 | 0    | 0    | 1 |
| IPR019350      | 1     | 1     | 0    | 0    | 1 |
| IPR003393      | 1.4   | 1     | 1.5  | 0    | 1 |
| IPR009791      | 3.25  | 0     | 3.25 | 0    | 1 |

|                |      |      |      |      |   |
|----------------|------|------|------|------|---|
| IPR005238      | 1.11 | 1    | 1.11 | 1.11 | 1 |
| IPR009799      | 1.6  | 1.6  | 1.6  | 0    | 1 |
| IPR009798      | 3.43 | 3.43 | 0    | 0    | 1 |
| PTHR10436      | 1    | 1    | 1    | 0    | 1 |
| IPR009424      | 7.17 | 7.17 | 0    | 0    | 1 |
| PF12139        | 1.04 | 0    | 1.04 | 1    | 1 |
| IPR006954      | 3.11 | 3.11 | 0    | 0    | 1 |
| IPR010752      | 2.14 | 0    | 2.14 | 0    | 1 |
| IPR020959      | 1    | 0    | 1    | 0    | 1 |
| IPR020377      | 1    | 0    | 1    | 0    | 1 |
| IPR020374      | 1    | 0    | 1    | 0    | 1 |
| IPR019561      | 1.5  | 1.78 | 0    | 1    | 1 |
| IPR021939      | 1.84 | 1.84 | 0    | 0    | 1 |
| IPR021930      | 2.05 | 2.05 | 0    | 0    | 1 |
| IPR009225      | 1.3  | 0    | 1.3  | 0    | 1 |
| IPR007515      | 1.21 | 1.21 | 0    | 0    | 1 |
| IPR007513      | 1.7  | 1.7  | 0    | 0    | 1 |
| IPR007519      | 1.93 | 1.93 | 0    | 0    | 1 |
| IPR001088      | 2.19 | 1    | 2.21 | 1.5  | 1 |
| PTHR12110      | 1    | 0    | 1    | 1    | 1 |
| IPR010607      | 1.34 | 0    | 1.34 | 0    | 1 |
| IPR004703      | 1.79 | 0    | 1.79 | 0    | 1 |
| IPR019254      | 1.16 | 0    | 1    | 1.2  | 1 |
| IPR003400      | 3.15 | 1    | 3.18 | 1    | 1 |
| PF11533        | 1.05 | 0    | 1.05 | 0    | 1 |
| PF11532        | 2.75 | 2.75 | 0    | 0    | 1 |
| PF11530        | 1    | 0    | 1    | 0    | 1 |
| IPR011638      | 1.15 | 0    | 1.15 | 0    | 1 |
| IPR011636      | 1.2  | 0    | 1.29 | 1.12 | 1 |
| IPR011632      | 12   | 0    | 12   | 0    | 1 |
| PD740661       | 1.22 | 0    | 1.22 | 0    | 1 |
| PTHR21190      | 1.13 | 1.13 | 0    | 0    | 1 |
| PD036408       | 1.14 | 0    | 1.14 | 0    | 1 |
| IPR013728      | 3.8  | 0    | 3.8  | 0    | 1 |
| IPR007759      | 1.01 | 0    | 1.01 | 0    | 1 |
| PTHR23155:SF6  | 1.62 | 0    | 1.62 | 0    | 1 |
| IPR013443      | 1.4  | 0    | 1.5  | 1    | 1 |
| PTHR15696      | 1.55 | 1.55 | 0    | 0    | 1 |
| PF12414        | 5.2  | 5.2  | 0    | 0    | 1 |
| PTHR10351:SF21 | 1.48 | 1.48 | 0    | 0    | 1 |
| IPR004516      | 1.01 | 1.2  | 1.01 | 1    | 1 |
| IPR005647      | 1.06 | 1.06 | 0    | 0    | 1 |
| IPR005646      | 1.33 | 0    | 1.33 | 0    | 1 |
| IPR005640      | 5.25 | 5.25 | 0    | 0    | 1 |
| IPR015158      | 1.13 | 1.13 | 0    | 0    | 1 |
| IPR022091      | 1.07 | 1.08 | 0    | 1    | 1 |
| IPR022095      | 1    | 0    | 1    | 0    | 1 |
| IPR022097      | 3.88 | 3.88 | 0    | 0    | 1 |
| IPR010527      | 1.15 | 0    | 1.15 | 0    | 1 |
| IPR010380      | 1.63 | 2    | 1.62 | 0    | 1 |
| IPR010384      | 1.04 | 1    | 1.04 | 0    | 1 |
| IPR010385      | 6.37 | 0    | 6.37 | 0    | 1 |
| IPR010388      | 1.29 | 0    | 1.3  | 1    | 1 |
| IPR010389      | 1.09 | 0    | 1.09 | 0    | 1 |
| IPR013876      | 1.09 | 1.09 | 0    | 0    | 1 |
| IPR013871      | 3.38 | 3.38 | 0    | 0    | 1 |
| IPR013879      | 1    | 1    | 0    | 0    | 1 |
| IPR003172      | 3.93 | 3.93 | 0    | 0    | 1 |
| PTHR14678      | 2.25 | 2.25 | 0    | 0    | 1 |
| PTHR18966:SF2  | 2    | 2    | 0    | 0    | 1 |
| IPR018939      | 1.26 | 1.27 | 1    | 0    | 1 |
| IPR018937      | 1.08 | 1.08 | 0    | 0    | 1 |
| PTHR23140      | 1.14 | 1.14 | 0    | 0    | 1 |
| PTHR21625      | 2.96 | 2.96 | 0    | 0    | 1 |
| TIGR01129      | 1.12 | 0    | 1.12 | 0    | 1 |
| IPR004184      | 2.05 | 2    | 2.06 | 1    | 1 |
| PTHR21540      | 1    | 1    | 0    | 0    | 1 |
| PTHR21546      | 1    | 1    | 0    | 0    | 1 |
| PTHR15836      | 2.38 | 2.38 | 0    | 0    | 1 |

|               |      |       |      |      |   |
|---------------|------|-------|------|------|---|
| IPR007276     | 1.25 | 1.25  | 0    | 0    | 1 |
| IPR000131     | 1.16 | 1.75  | 1.11 | 1    | 1 |
| PTHR13252:SF2 | 1.12 | 1.12  | 0    | 0    | 1 |
| IPR001848     | 1.17 | 2.67  | 1.02 | 1.13 | 1 |
| IPR004728     | 1.2  | 1.2   | 0    | 0    | 1 |
| IPR012505     | 2.64 | 0     | 2.64 | 0    | 1 |
| IPR012507     | 1.52 | 0     | 1.52 | 0    | 1 |
| IPR009714     | 4.4  | 4.4   | 0    | 0    | 1 |
| IPR009711     | 1.29 | 0     | 1.29 | 0    | 1 |
| IPR001267     | 1.08 | 1.83  | 1.03 | 1    | 1 |
| IPR021225     | 1.61 | 0     | 1.61 | 0    | 1 |
| IPR018480     | 1.01 | 1     | 1.01 | 1    | 1 |
| PF12209       | 1    | 1     | 0    | 0    | 1 |
| PTHR13298     | 1.33 | 1.33  | 0    | 0    | 1 |
| IPR019530     | 1.11 | 1.11  | 0    | 0    | 1 |
| IPR019532     | 1.32 | 1.32  | 0    | 0    | 1 |
| IPR019536     | 2.35 | 2.35  | 0    | 0    | 1 |
| IPR002767     | 1.19 | 1.16  | 1.2  | 1.09 | 1 |
| IPR017452     | 2.25 | 2.25  | 0    | 0    | 1 |
| IPR007036     | 1.87 | 2.11  | 1.85 | 2.3  | 1 |
| PTHR10342:SF7 | 1    | 1     | 1    | 0    | 1 |
| PF11939       | 1.01 | 0     | 1.01 | 0    | 1 |
| PTHR21838     | 1.4  | 1.4   | 0    | 0    | 1 |
| IPR020484     | 1.4  | 0     | 1.4  | 0    | 1 |
| IPR020486     | 1.05 | 0     | 1    | 1.33 | 1 |
| PTHR20870     | 1.35 | 1.35  | 0    | 0    | 1 |
| PD170898      | 1.95 | 0     | 1.95 | 0    | 1 |
| PTHR22795:SF1 | 1    | 1     | 0    | 0    | 1 |
| PF08342       | 1.11 | 0     | 1.11 | 0    | 1 |
| IPR021425     | 1    | 0     | 1    | 0    | 1 |
| IPR022198     | 6.27 | 6.27  | 0    | 0    | 1 |
| IPR022196     | 2.41 | 0     | 2.41 | 0    | 1 |
| IPR022191     | 1.56 | 0     | 1.56 | 0    | 1 |
| IPR006779     | 2.57 | 2.57  | 0    | 0    | 1 |
| IPR002856     | 1.23 | 0     | 1    | 1.26 | 1 |
| PF09288       | 1.07 | 1.07  | 0    | 0    | 1 |
| IPR007840     | 1.03 | 0     | 1.03 | 0    | 1 |
| IPR007849     | 1.12 | 1.14  | 1    | 1    | 1 |
| IPR010801     | 1    | 0     | 1    | 0    | 1 |
| IPR007331     | 2.8  | 0     | 2.8  | 0    | 1 |
| IPR007335     | 1.05 | 0     | 1.05 | 0    | 1 |
| IPR003650     | 2.84 | 2.84  | 0    | 0    | 1 |
| IPR013572     | 1.47 | 1     | 1.48 | 1    | 1 |
| IPR013570     | 1.39 | 1     | 1.4  | 0    | 1 |
| IPR013571     | 1.36 | 0     | 1.36 | 0    | 1 |
| IPR013576     | 1.7  | 1.7   | 0    | 0    | 1 |
| IPR004021     | 8    | 8     | 0    | 0    | 1 |
| IPR004023     | 1.37 | 1.37  | 0    | 0    | 1 |
| IPR004029     | 1.18 | 0     | 1.18 | 1    | 1 |
| IPR000308     | 4.86 | 4.86  | 0    | 0    | 1 |
| PF03670       | 1.38 | 1.45  | 1    | 0    | 1 |
| IPR002683     | 3.65 | 15.11 | 1    | 1    | 1 |
| IPR018566     | 1    | 0     | 1    | 0    | 1 |
| IPR004978     | 3    | 3     | 0    | 0    | 1 |
| IPR009508     | 1.22 | 1.22  | 0    | 0    | 1 |
| PF05090       | 1.24 | 1     | 1.22 | 1.5  | 1 |
| TIGR01396     | 1    | 1     | 1    | 0    | 1 |
| IPR010490     | 1.15 | 1.15  | 0    | 0    | 1 |
| IPR022000     | 1.26 | 0     | 1.26 | 0    | 1 |
| PTHR13902:SF4 | 1.67 | 1.67  | 0    | 0    | 1 |
| IPR001415     | 2.92 | 2.92  | 0    | 0    | 1 |
| IPR019013     | 1.57 | 1.57  | 0    | 0    | 1 |
| PTHR21654     | 2    | 2     | 0    | 0    | 1 |
| IPR018764     | 1.35 | 1     | 1.36 | 0    | 1 |
| IPR008525     | 2    | 0     | 2    | 0    | 1 |
| IPR015222     | 1.15 | 1.16  | 1    | 0    | 1 |
| IPR010551     | 1.11 | 0     | 1.18 | 1    | 1 |
| IPR010300     | 1.22 | 1.29  | 1.2  | 0    | 1 |
| IPR010301     | 1.24 | 1.24  | 0    | 0    | 1 |



|                |      |      |      |      |   |
|----------------|------|------|------|------|---|
| PTHR13768:SF8  | 1.63 | 1.63 | 0    | 0    | 1 |
| IPR002809      | 1.1  | 1    | 0    | 1.11 | 1 |
| IPR000406      | 1.73 | 1.73 | 0    | 0    | 1 |
| PTHR15545      | 1.12 | 1.12 | 0    | 0    | 1 |
| PTHR16222      | 1    | 0    | 1    | 0    | 1 |
| PTHR12907      | 1.25 | 1.25 | 0    | 0    | 1 |
| PTHR23308:SF7  | 1    | 1    | 0    | 0    | 1 |
| PTHR15065      | 1.2  | 1.2  | 0    | 0    | 1 |
| IPR009346      | 1.16 | 1.16 | 0    | 0    | 1 |
| IPR007145      | 2.81 | 2.81 | 0    | 0    | 1 |
| IPR021113      | 3.17 | 3.17 | 0    | 0    | 1 |
| IPR021112      | 1.18 | 0    | 1.18 | 0    | 1 |
| PF06509        | 1.01 | 0    | 1.01 | 0    | 1 |
| PTHR16023      | 1    | 1    | 0    | 0    | 1 |
| IPR012583      | 2    | 2    | 0    | 0    | 1 |
| IPR015051      | 1.05 | 1    | 1.05 | 0    | 1 |
| IPR015057      | 1.43 | 0    | 1.43 | 0    | 1 |
| PTHR21735      | 1    | 1    | 0    | 0    | 1 |
| IPR021802      | 4.3  | 4.3  | 0    | 0    | 1 |
| PTHR11161      | 6    | 6    | 0    | 0    | 1 |
| PTHR15665      | 1.06 | 1.06 | 0    | 0    | 1 |
| IPR014892      | 1.4  | 1.44 | 1    | 1    | 1 |
| PTHR23139:SF4  | 1    | 1    | 0    | 0    | 1 |
| IPR004190      | 1.05 | 2    | 1    | 0    | 1 |
| IPR020404      | 1.11 | 0    | 1.11 | 0    | 1 |
| PTHR23068      | 3    | 3    | 0    | 0    | 1 |
| IPR022114      | 4.25 | 4.25 | 0    | 0    | 1 |
| IPR022111      | 1    | 0    | 1    | 0    | 1 |
| PTHR21287      | 5.92 | 5.92 | 0    | 0    | 1 |
| PTHR21289      | 1    | 1    | 0    | 0    | 1 |
| PTHR11939:SF18 | 1.44 | 1.44 | 0    | 0    | 1 |
| TIGR03310      | 1    | 0    | 1    | 0    | 1 |
| TIGR03317      | 1.01 | 1    | 1.01 | 0    | 1 |
| PTHR19237:SF2  | 1.31 | 1.31 | 0    | 0    | 1 |
| PTHR19237:SF3  | 1.86 | 1.86 | 0    | 0    | 1 |
| IPR006173      | 4.9  | 0    | 4.9  | 0    | 1 |
| PTHR11614:SF9  | 1    | 1    | 1    | 1    | 1 |
| IPR000389      | 2.11 | 2.86 | 1.6  | 2    | 1 |
| IPR018872      | 9.43 | 9.43 | 0    | 0    | 1 |
| IPR015938      | 3.2  | 3.2  | 0    | 0    | 1 |
| IPR001380      | 1.46 | 1.56 | 0    | 1.06 | 1 |
| IPR021301      | 1.08 | 1    | 1.08 | 0    | 1 |
| IPR021303      | 1    | 0    | 1    | 0    | 1 |
| IPR004601      | 1.18 | 1.08 | 1.22 | 1    | 1 |
| IPR019477      | 2.31 | 2.31 | 0    | 0    | 1 |
| IPR019470      | 1.12 | 0    | 1.12 | 0    | 1 |
| IPR019473      | 1.38 | 1.38 | 0    | 0    | 1 |
| IPR019478      | 1.15 | 0    | 1.15 | 1    | 1 |
| PTHR11827      | 1    | 1    | 0    | 0    | 1 |
| IPR001800      | 8    | 0    | 8    | 0    | 1 |
| IPR010413      | 1.03 | 0    | 1.03 | 1    | 1 |
| IPR010415      | 1.03 | 1    | 1.03 | 0    | 1 |
| PTHR10151      | 1    | 1    | 1    | 0    | 1 |
| IPR014911      | 1.34 | 0    | 1.34 | 0    | 1 |
| IPR014919      | 3.08 | 0    | 3.08 | 0    | 1 |
| IPR014918      | 1.07 | 1    | 1.07 | 0    | 1 |
| IPR013949      | 1.15 | 1.15 | 0    | 0    | 1 |
| IPR002615      | 1.22 | 1.5  | 1.15 | 0    | 1 |
| IPR020235      | 1.75 | 0    | 1.75 | 0    | 1 |
| TIGR00046      | 1    | 1    | 1    | 0    | 1 |
| TIGR03535      | 1    | 0    | 1    | 0    | 1 |
| PF09812        | 1.04 | 1.04 | 0    | 0    | 1 |
| IPR021676      | 1.17 | 1    | 1.17 | 0    | 1 |
| IPR021672      | 1    | 0    | 1    | 0    | 1 |
| IPR006709      | 1.36 | 1.36 | 0    | 0    | 1 |
| IPR006700      | 1.11 | 1.5  | 1.1  | 0    | 1 |
| PF04215        | 1.56 | 0    | 1.56 | 0    | 1 |
| IPR003751      | 1.22 | 0    | 1.22 | 0    | 1 |
| IPR003757      | 1.25 | 1.33 | 1.23 | 0    | 1 |

|                 |       |       |      |   |   |
|-----------------|-------|-------|------|---|---|
| IPR008570       | 1.19  | 1.19  | 0    | 0 | 1 |
| PTHR13683:SF10C | 10.33 | 10.33 | 0    | 0 | 1 |
| IPR005353       | 1     | 0     | 1    | 1 | 1 |
| IPR021533       | 5.48  | 0     | 5.48 | 0 | 1 |
| IPR008390       | 7.43  | 7.43  | 0    | 0 | 1 |
| IPR004830       | 3.41  | 0     | 3.43 | 3 | 1 |
| PF12338         | 4.5   | 4.5   | 0    | 0 | 1 |
| PTHR13630       | 1.12  | 1.12  | 0    | 0 | 1 |
| IPR010627       | 1.04  | 1     | 1.04 | 0 | 1 |
| PTHR22847:SF49  | 1     | 1     | 0    | 0 | 1 |
| IPR007915       | 1.24  | 1.24  | 0    | 0 | 1 |
| PF07049         | 2     | 0     | 2    | 0 | 1 |
| PTHR13403:SF6   | 1.33  | 1.33  | 0    | 0 | 1 |
| PF08234         | 1.29  | 1.32  | 0    | 1 | 1 |
| IPR018155       | 4.62  | 4.62  | 0    | 0 | 1 |
| PTHR10499:SF12  | 1     | 0     | 1    | 0 | 1 |
| TIGR00975       | 1     | 0     | 1    | 0 | 1 |
| IPR008665       | 1.11  | 0     | 1.11 | 0 | 1 |
| TIGR00971       | 1     | 0     | 1    | 0 | 1 |
| PTHR11474       | 2.09  | 2.5   | 1    | 0 | 1 |
| IPR009869       | 2     | 2     | 0    | 0 | 1 |
| IPR006512       | 3.17  | 0     | 3.18 | 2 | 1 |
| IPR013347       | 1     | 0     | 0    | 1 | 1 |
| PTHR12223:SF7   | 1.33  | 1.33  | 0    | 0 | 1 |
| PTHR18958:SF80  | 17.33 | 17.33 | 0    | 0 | 1 |
| IPR001893       | 8.9   | 15.27 | 1.53 | 0 | 1 |
| IPR001894       | 4.8   | 4.8   | 0    | 0 | 1 |
| PTHR21726:SF3   | 2.25  | 2.25  | 0    | 0 | 1 |
| PTHR21726:SF4   | 3.17  | 3.17  | 0    | 0 | 1 |
| PTHR21726:SF5   | 1     | 1     | 0    | 0 | 1 |
| PD102758        | 1.44  | 0     | 1.44 | 0 | 1 |
| IPR019361       | 1.09  | 1.09  | 0    | 0 | 1 |
| IPR019363       | 1.36  | 1.38  | 1    | 0 | 1 |
| IPR019368       | 1.14  | 1.14  | 0    | 0 | 1 |
| IPR005234       | 1.05  | 0     | 1.05 | 1 | 1 |
| PF05706         | 1.75  | 2.38  | 1.12 | 0 | 1 |
| PF12105         | 1     | 0     | 1    | 0 | 1 |
| PF12109         | 1.38  | 1.38  | 0    | 0 | 1 |
| PTHR21209       | 1.25  | 1.25  | 0    | 0 | 1 |
| PTHR21205       | 1     | 1     | 0    | 0 | 1 |
| IPR000079       | 4.58  | 4.58  | 0    | 0 | 1 |
| IPR019162       | 1.45  | 1.45  | 0    | 0 | 1 |
| PD052969        | 1     | 0     | 1    | 0 | 1 |
| IPR019168       | 1.4   | 1.4   | 0    | 0 | 1 |
| IPR008106       | 10.2  | 0     | 10.2 | 0 | 1 |
| IPR015316       | 1     | 1     | 0    | 0 | 1 |
| IPR015310       | 1.58  | 1.58  | 0    | 0 | 1 |
| IPR015311       | 1.44  | 1.44  | 0    | 0 | 1 |
| IPR021967       | 1.09  | 1.09  | 0    | 0 | 1 |
| IPR021969       | 1.17  | 1     | 1.17 | 0 | 1 |
| IPR018698       | 1.19  | 0     | 1.2  | 1 | 1 |
| IPR005551       | 1.16  | 0     | 1.16 | 0 | 1 |
| IPR009279       | 1.18  | 0     | 1.18 | 0 | 1 |
| IPR013944       | 1.17  | 1.25  | 1    | 0 | 1 |
| IPR006231       | 1.25  | 1     | 1.25 | 0 | 1 |
| IPR007544       | 1.01  | 0     | 1.02 | 1 | 1 |
| IPR014994       | 2.9   | 0     | 2.9  | 0 | 1 |
| IPR014996       | 1.24  | 0     | 1.24 | 0 | 1 |
| IPR014991       | 1.11  | 1     | 1.11 | 0 | 1 |
| IPR014992       | 1.65  | 0     | 1.65 | 0 | 1 |
| PF04630         | 1.13  | 1     | 1.14 | 0 | 1 |
| PTHR13878       | 1.16  | 1.77  | 1.02 | 0 | 1 |
| PTHR13872       | 1.42  | 1.44  | 1    | 1 | 1 |
| PF03915         | 2.3   | 2.47  | 1.33 | 0 | 1 |
| IPR002747       | 1.06  | 1     | 1.07 | 1 | 1 |
| IPR014771       | 2.5   | 2.5   | 0    | 0 | 1 |
| PTHR23308       | 1.07  | 1.07  | 0    | 0 | 1 |
| PTHR23304       | 2.3   | 2.44  | 1    | 0 | 1 |
| IPR004156       | 8.19  | 8.19  | 0    | 0 | 1 |

|                |      |      |      |      |   |
|----------------|------|------|------|------|---|
| PD049684       | 1    | 0    | 1    | 0    | 1 |
| IPR003208      | 1.42 | 0    | 1.42 | 0    | 1 |
| IPR003204      | 1.07 | 1.07 | 0    | 0    | 1 |
| IPR003206      | 1.11 | 0    | 1.11 | 0    | 1 |
| IPR006782      | 3.11 | 3.11 | 0    | 0    | 1 |
| IPR006787      | 1.56 | 1.56 | 0    | 0    | 1 |
| IPR006786      | 1.24 | 1.24 | 0    | 0    | 1 |
| IPR015879      | 2.5  | 1    | 2.6  | 1    | 1 |
| IPR021028      | 1.25 | 0    | 1.25 | 0    | 1 |
| IPR009783      | 1.12 | 1    | 1.14 | 1    | 1 |
| IPR022046      | 1.24 | 1.24 | 0    | 0    | 1 |
| IPR022047      | 1.8  | 1.8  | 0    | 0    | 1 |
| IPR022043      | 1.23 | 1.23 | 0    | 0    | 1 |
| IPR005697      | 1.03 | 1    | 1.03 | 0    | 1 |
| IPR015292      | 1.18 | 0    | 1.18 | 0    | 1 |
| IPR015295      | 1    | 0    | 1    | 0    | 1 |
| IPR015294      | 1.11 | 0    | 1.11 | 0    | 1 |
| IPR008312      | 1.77 | 0    | 1.77 | 0    | 1 |
| IPR008313      | 1.22 | 1.32 | 1.18 | 0    | 1 |
| IPR015125      | 1.86 | 1.86 | 0    | 0    | 1 |
| IPR015121      | 2.17 | 2.17 | 0    | 0    | 1 |
| PTHR11909      | 1.42 | 1.42 | 0    | 0    | 1 |
| PTHR10367      | 1.14 | 1.14 | 0    | 0    | 1 |
| IPR007995      | 3.3  | 0    | 3.3  | 0    | 1 |
| PF05822        | 1.58 | 1.59 | 1    | 0    | 1 |
| PTHR11012      | 1.17 | 1.17 | 0    | 0    | 1 |
| IPR003750      | 1.19 | 1.28 | 0    | 1.03 | 1 |
| PTHR12595      | 1.03 | 1.06 | 0    | 1    | 1 |
| PTHR23329:SF1  | 1    | 1    | 0    | 0    | 1 |
| PTHR23258:SF43 | 2.8  | 2.8  | 0    | 0    | 1 |
| PF11841        | 1.7  | 1.7  | 0    | 0    | 1 |
| PF11844        | 1.07 | 0    | 1.07 | 0    | 1 |
| IPR020579      | 1.04 | 0    | 1.04 | 1    | 1 |
| IPR003201      | 2.89 | 0    | 2.89 | 0    | 1 |
| TIGR02433      | 1    | 0    | 1    | 0    | 1 |
| IPR022208      | 1.09 | 3    | 1    | 1    | 1 |
| IPR022203      | 1.12 | 1.83 | 1    | 0    | 1 |
| IPR022204      | 1    | 0    | 1    | 0    | 1 |
| IPR022206      | 1    | 0    | 1    | 0    | 1 |
| IPR006590      | 1.73 | 1.73 | 0    | 0    | 1 |
| IPR003414      | 1.09 | 1.33 | 1.08 | 1.22 | 1 |
| IPR003413      | 1.13 | 1    | 1.13 | 0    | 1 |
| IPR007245      | 1.41 | 1.41 | 0    | 0    | 1 |
| IPR007244      | 1.09 | 1.09 | 0    | 0    | 1 |
| IPR007247      | 1.22 | 1.07 | 1.26 | 0    | 1 |
| IPR007246      | 1.19 | 1.19 | 0    | 0    | 1 |
| IPR007240      | 1.31 | 1.31 | 0    | 0    | 1 |
| IPR021278      | 1.17 | 1.17 | 0    | 0    | 1 |
| PD009120       | 2.6  | 2.6  | 0    | 0    | 1 |
| IPR009743      | 2.14 | 2.14 | 0    | 0    | 1 |
| PTHR10617:SF1  | 1    | 0    | 1    | 0    | 1 |
| PTHR13773      | 1    | 0    | 1    | 0    | 1 |
| IPR019500      | 1.7  | 1    | 1.71 | 0    | 1 |
| IPR006921      | 1.57 | 1.57 | 0    | 0    | 1 |
| IPR006927      | 8.14 | 8.14 | 0    | 0    | 1 |
| IPR006926      | 1.43 | 1.43 | 0    | 0    | 1 |
| IPR006925      | 1.26 | 1.26 | 0    | 0    | 1 |
| IPR017483      | 1.56 | 0    | 1.56 | 0    | 1 |
| IPR000802      | 1.24 | 1.86 | 1.2  | 1    | 1 |
| IPR014826      | 1.82 | 0    | 2.03 | 1.31 | 1 |
| IPR017738      | 1.02 | 0    | 1.02 | 0    | 1 |
| IPR006737      | 2.5  | 2.5  | 0    | 0    | 1 |
| PTHR11019:SF12 | 1    | 1    | 1    | 0    | 1 |
| PTHR12419      | 2    | 2    | 0    | 0    | 1 |
| IPR020307      | 1.12 | 0    | 1.12 | 0    | 1 |
| IPR012510      | 27   | 27   | 0    | 0    | 1 |
| IPR021026      | 1.68 | 0    | 1.68 | 0    | 1 |
| PTHR21495      | 1.25 | 1.25 | 0    | 0    | 1 |
| PTHR21494      | 1    | 1    | 0    | 0    | 1 |

|                |       |      |       |      |   |
|----------------|-------|------|-------|------|---|
| IPR015426      | 1.52  | 0    | 1.52  | 0    | 1 |
| IPR018616      | 1.54  | 1.54 | 0     | 0    | 1 |
| IPR018617      | 1.22  | 1.22 | 0     | 0    | 1 |
| TIGR02578      | 1     | 0    | 1     | 1    | 1 |
| IPR015397      | 3.8   | 0    | 3.8   | 0    | 1 |
| PTHR21725      | 1.75  | 1.75 | 0     | 0    | 1 |
| IPR003767      | 1.92  | 1.88 | 2.01  | 1    | 1 |
| IPR009945      | 1.16  | 0    | 1.16  | 0    | 1 |
| IPR010279      | 1.96  | 1    | 1.96  | 0    | 1 |
| IPR007897      | 1.44  | 0    | 1.44  | 0    | 1 |
| IPR017136      | 1.03  | 1    | 1.03  | 0    | 1 |
| IPR010853      | 108.4 | 0    | 108.4 | 0    | 1 |
| IPR010858      | 1.03  | 0    | 1.03  | 0    | 1 |
| PTHR10891:SF8  | 1.75  | 1.75 | 0     | 0    | 1 |
| PTHR10891:SF5  | 1.29  | 1.31 | 1     | 0    | 1 |
| IPR018556      | 1.12  | 1.12 | 0     | 0    | 1 |
| IPR011664      | 1.36  | 0    | 1.36  | 0    | 1 |
| PTHR14131      | 1     | 1    | 0     | 0    | 1 |
| PD209215       | 1     | 0    | 1     | 0    | 1 |
| PTHR13555:SF3  | 1.56  | 1.6  | 1     | 0    | 1 |
| PTHR12205      | 1     | 1    | 0     | 0    | 1 |
| IPR000468      | 1.1   | 0    | 1.1   | 1    | 1 |
| IPR007701      | 1.59  | 1.59 | 0     | 0    | 1 |
| IPR007709      | 1.99  | 1    | 2.02  | 1    | 1 |
| IPR000730      | 2.79  | 2.93 | 0     | 2.57 | 1 |
| PD119161       | 1.15  | 0    | 1.15  | 0    | 1 |
| IPR008380      | 2.94  | 3.54 | 1.17  | 0    | 1 |
| IPR001463      | 1.9   | 0    | 1.92  | 1    | 1 |
| IPR018792      | 1.63  | 1.63 | 0     | 0    | 1 |
| IPR018790      | 1.69  | 2.97 | 1.08  | 0    | 1 |
| IPR018795      | 1.39  | 1.39 | 0     | 0    | 1 |
| IPR005615      | 1.58  | 1.66 | 1.17  | 0    | 1 |
| IPR009047      | 1.24  | 0    | 0     | 1.24 | 1 |
| IPR010334      | 1.5   | 1.5  | 0     | 0    | 1 |
| IPR002830      | 1.33  | 1.57 | 1.32  | 1.4  | 1 |
| IPR002835      | 1.04  | 0    | 1.03  | 1.04 | 1 |
| IPR013174      | 1.13  | 1.13 | 0     | 0    | 1 |
| IPR013175      | 1.04  | 1.04 | 0     | 0    | 1 |
| IPR012880      | 1.23  | 1.23 | 0     | 0    | 1 |
| IPR012883      | 1.05  | 1.05 | 0     | 0    | 1 |
| PTHR15577      | 1.06  | 1.06 | 0     | 0    | 1 |
| PTHR10050:SF1  | 1     | 0    | 1     | 0    | 1 |
| PTHR10050:SF5  | 2.6   | 9    | 1     | 0    | 1 |
| PTHR11697:SF9  | 8     | 8    | 0     | 0    | 1 |
| IPR008585      | 1.72  | 1    | 1.74  | 0    | 1 |
| PTHR13068      | 1.14  | 1.14 | 0     | 0    | 1 |
| IPR018964      | 1.15  | 0    | 1.15  | 0    | 1 |
| PTHR23199      | 2.87  | 2.87 | 0     | 0    | 1 |
| PF11356        | 1.24  | 0    | 1.24  | 0    | 1 |
| PTHR23056:SF4  | 1.55  | 1.55 | 0     | 0    | 1 |
| IPR007136      | 6.13  | 2.5  | 6.25  | 0    | 1 |
| IPR007139      | 3.04  | 4    | 3.03  | 0    | 1 |
| PF00673        | 1.11  | 2.06 | 1.02  | 1    | 1 |
| PTHR16055      | 1.29  | 1.29 | 0     | 0    | 1 |
| PTHR11632:SF3  | 1     | 1    | 1     | 0    | 1 |
| IPR015002      | 1.5   | 0    | 1.5   | 0    | 1 |
| IPR015006      | 1.14  | 1.14 | 0     | 0    | 1 |
| PD027657       | 3     | 0    | 3     | 0    | 1 |
| IPR010780      | 1.76  | 0    | 1.76  | 0    | 1 |
| PTHR12496      | 1.82  | 1.86 | 1     | 0    | 1 |
| IPR012926      | 1.71  | 1.71 | 0     | 0    | 1 |
| PF11967        | 1     | 0    | 1     | 0    | 1 |
| IPR004436      | 1.02  | 1    | 1.02  | 0    | 1 |
| IPR020384      | 1     | 0    | 1     | 0    | 1 |
| IPR020388      | 1     | 0    | 1     | 0    | 1 |
| PTHR23011      | 1.86  | 1.86 | 0     | 0    | 1 |
| PTHR22572:SF15 | 1     | 1    | 1     | 1    | 1 |
| PTHR22854      | 1     | 0    | 1     | 1    | 1 |
| IPR022128      | 1.02  | 0    | 1.02  | 0    | 1 |

|                |      |      |      |      |   |
|----------------|------|------|------|------|---|
| TIGR02739      | 1.14 | 0    | 1.14 | 0    | 1 |
| PTHR22814:SF5  | 5.83 | 5.83 | 0    | 0    | 1 |
| IPR007814      | 2.35 | 1.5  | 2.37 | 2    | 1 |
| IPR007816      | 1.48 | 1    | 1.49 | 0    | 1 |
| PTHR15959      | 1    | 1    | 0    | 0    | 1 |
| PTHR10032:SF63 | 1.41 | 1.41 | 0    | 0    | 1 |
| IPR001912      | 1.17 | 2.27 | 1.05 | 1    | 1 |
| PTHR15921      | 1.67 | 1.67 | 0    | 0    | 1 |
| IPR007360      | 1.05 | 0    | 1.05 | 0    | 1 |
| PTHR22854:SF2  | 1    | 0    | 1    | 0    | 1 |
| IPR000358      | 1.41 | 1.63 | 1.39 | 1.09 | 1 |
| IPR018880      | 1.31 | 0    | 1.31 | 0    | 1 |
| IPR019287      | 1    | 0    | 1    | 1    | 1 |
| IPR004984      | 1.83 | 0    | 1.83 | 0    | 1 |
| IPR007509      | 1    | 0    | 0    | 1    | 1 |
| IPR005584      | 1.03 | 0    | 1.03 | 0    | 1 |
| IPR005586      | 1.35 | 1.5  | 1.35 | 0    | 1 |
| IPR002674      | 1.14 | 1.23 | 0    | 1    | 1 |
| IPR002678      | 1.12 | 1.32 | 1.1  | 1.08 | 1 |
| PF04938        | 1.12 | 1.12 | 0    | 0    | 1 |
| PTHR10887:SF7  | 1.15 | 0    | 1.14 | 1.33 | 1 |
| IPR010235      | 1.51 | 0    | 1.53 | 1    | 1 |
| IPR013991      | 1    | 0    | 1    | 0    | 1 |
| PTHR19959:SF22 | 1.29 | 1.33 | 1    | 0    | 1 |
| PTHR23116      | 1    | 1    | 0    | 0    | 1 |
| PTHR13886      | 2    | 2    | 0    | 0    | 1 |
| PTHR12289      | 1.07 | 1    | 1.17 | 0    | 1 |
| TIGR01658      | 1.25 | 1.25 | 0    | 0    | 1 |
| IPR016905      | 1.04 | 0    | 1.04 | 0    | 1 |
| IPR020190      | 1.14 | 1.14 | 0    | 0    | 1 |
| PTHR10997:SF9  | 1.14 | 1.14 | 0    | 0    | 1 |
| IPR018710      | 1.02 | 1    | 1.02 | 0    | 1 |
| IPR021644      | 1    | 1    | 0    | 0    | 1 |
| IPR021641      | 1.2  | 1.2  | 0    | 0    | 1 |
| IPR021643      | 1.22 | 1.22 | 0    | 0    | 1 |
| TIGR02320      | 1.1  | 2    | 1    | 0    | 1 |
| PTHR21600      | 1    | 1    | 1    | 0    | 1 |
| IPR003195      | 1.93 | 1.93 | 0    | 0    | 1 |
| IPR014922      | 1.85 | 1    | 1.86 | 1.33 | 1 |
| IPR014923      | 1.26 | 1    | 1.27 | 1.33 | 1 |
| IPR006751      | 1.34 | 1.34 | 0    | 0    | 1 |
| IPR006752      | 1.73 | 0    | 0    | 1.73 | 1 |
| IPR013931      | 1.28 | 1.28 | 0    | 0    | 1 |
| PF09024        | 1    | 1    | 0    | 0    | 1 |
| IPR003704      | 1.4  | 0    | 2.33 | 1.17 | 1 |
| IPR003708      | 1.05 | 1    | 1.05 | 0    | 1 |
| IPR001707      | 1.26 | 1    | 1.27 | 1    | 1 |
| IPR013711      | 7.5  | 7.5  | 0    | 0    | 1 |
| IPR013714      | 1.15 | 1.15 | 0    | 0    | 1 |
| IPR008503      | 2.1  | 0    | 2.16 | 1    | 1 |
| IPR004288      | 1.78 | 0    | 1.78 | 0    | 1 |
| IPR004289      | 1    | 1    | 0    | 0    | 1 |
| PTHR12957      | 1.5  | 1.5  | 0    | 0    | 1 |
| PTHR10552      | 1.78 | 1.78 | 0    | 0    | 1 |
| PF12345        | 1.05 | 1    | 1.06 | 0    | 1 |
| PTHR13609      | 1.46 | 1.46 | 0    | 0    | 1 |
| PTHR23264      | 1.14 | 0    | 1    | 1.6  | 1 |
| IPR010672      | 1.74 | 0    | 0    | 1.74 | 1 |
| IPR010673      | 1.53 | 0    | 1.53 | 0    | 1 |
| IPR010678      | 1.18 | 1.18 | 0    | 0    | 1 |
| PTHR15031      | 1    | 1    | 1    | 0    | 1 |
| PF11181        | 2.33 | 0    | 2.33 | 0    | 1 |
| PTHR21377      | 1    | 1    | 0    | 0    | 1 |
| PTHR21373      | 1.18 | 1.18 | 0    | 0    | 1 |
| PTHR21776      | 1.08 | 1.08 | 0    | 0    | 1 |
| IPR019674      | 3.11 | 0    | 3.11 | 0    | 1 |
| IPR022416      | 3    | 3    | 0    | 0    | 1 |
| IPR021855      | 1.35 | 2.88 | 1    | 0    | 1 |
| IPR021856      | 1.21 | 0    | 1.21 | 0    | 1 |

|               |      |      |      |      |   |
|---------------|------|------|------|------|---|
| IPR021851     | 1.37 | 1.81 | 1.15 | 0    | 1 |
| PTHR23402:SF1 | 1.14 | 1.14 | 0    | 0    | 1 |
| PTHR21035     | 1.12 | 1.12 | 0    | 0    | 1 |
| PTHR21032     | 1    | 1    | 0    | 0    | 1 |
| IPR002150     | 1.18 | 2    | 1.17 | 0    | 1 |
| IPR009836     | 3.19 | 3.43 | 1    | 0    | 1 |
| IPR006384     | 1.52 | 2    | 1.02 | 0    | 1 |
| IPR007476     | 1.11 | 1    | 1.11 | 0    | 1 |
| IPR007470     | 1.01 | 0    | 1.01 | 0    | 1 |
| PTHR15633     | 1    | 1    | 0    | 0    | 1 |
| PF07164       | 1.12 | 0    | 1.12 | 0    | 1 |
| PF07168       | 2.67 | 4.67 | 1.33 | 0    | 1 |
| IPR005297     | 2.79 | 0    | 2.78 | 3    | 1 |
| IPR019339     | 1.64 | 1.64 | 0    | 0    | 1 |
| PTHR13102     | 1.33 | 1.33 | 0    | 0    | 1 |
| IPR009445     | 1.19 | 1.19 | 0    | 0    | 1 |
| IPR009444     | 2.31 | 0    | 2.31 | 0    | 1 |
| PTHR21233     | 1.15 | 1.15 | 0    | 0    | 1 |
| IPR007671     | 1.42 | 1.42 | 0    | 0    | 1 |
| IPR007672     | 1.33 | 1.33 | 0    | 0    | 1 |
| IPR007676     | 1.51 | 1.51 | 0    | 0    | 1 |
| IPR015071     | 1    | 0    | 1    | 0    | 1 |
| IPR013588     | 2.33 | 2.33 | 0    | 0    | 1 |
| IPR015073     | 1.03 | 0    | 1.03 | 0    | 1 |
| PTHR13340     | 1.24 | 1.24 | 0    | 0    | 1 |
| IPR001084     | 7.92 | 7.92 | 0    | 0    | 1 |
| PF12530       | 2.08 | 2.08 | 0    | 0    | 1 |
| PF12537       | 1.27 | 1.27 | 0    | 0    | 1 |
| PF12535       | 1.01 | 0    | 1.01 | 0    | 1 |
| IPR013666     | 8.57 | 8.57 | 0    | 0    | 1 |
| IPR018807     | 1.44 | 1.44 | 0    | 0    | 1 |
| IPR018805     | 1.42 | 1.42 | 0    | 0    | 1 |
| IPR015327     | 1.14 | 1.14 | 0    | 0    | 1 |
| IPR015329     | 1    | 0    | 1    | 1    | 1 |
| IPR021954     | 1.02 | 1.17 | 1    | 0    | 1 |
| IPR006884     | 1.84 | 1.84 | 0    | 0    | 1 |
| IPR005509     | 1.4  | 0    | 1.4  | 0    | 1 |
| IPR005501     | 1.24 | 1.15 | 1.24 | 1    | 1 |
| PF05040       | 4.92 | 4.92 | 0    | 0    | 1 |
| IPR011516     | 1.06 | 1.06 | 0    | 0    | 1 |
| IPR011518     | 2.69 | 0    | 2.69 | 0    | 1 |
| IPR013910     | 1.28 | 1.28 | 0    | 0    | 1 |
| IPR013912     | 1.08 | 1.08 | 0    | 0    | 1 |
| IPR013913     | 1.5  | 1.5  | 0    | 0    | 1 |
| PTHR12758     | 2.67 | 2.67 | 0    | 0    | 1 |
| PTHR10315:SF7 | 1    | 1    | 0    | 0    | 1 |
| PTHR10527:SF1 | 1.43 | 1.43 | 0    | 0    | 1 |
| PTHR13800     | 2.81 | 3.42 | 1    | 0    | 1 |
| IPR019815     | 1.06 | 1.33 | 1.04 | 0    | 1 |
| IPR019814     | 1.06 | 1.86 | 1.04 | 0    | 1 |
| PTHR23358     | 1.44 | 1.44 | 0    | 0    | 1 |
| TIGR03545     | 1    | 0    | 1    | 0    | 1 |
| TIGR03544     | 1.44 | 0    | 1.44 | 0    | 1 |
| TIGR03548     | 1    | 0    | 1    | 0    | 1 |
| TIGR02637     | 1    | 0    | 1    | 0    | 1 |
| IPR007000     | 1.97 | 2.24 | 1.2  | 0    | 1 |
| IPR003784     | 1.21 | 1    | 1.22 | 1    | 1 |
| IPR003785     | 1.41 | 1    | 1.43 | 1.32 | 1 |
| IPR000787     | 1.45 | 0    | 1.4  | 2.55 | 1 |
| IPR001782     | 1.16 | 1    | 1.16 | 0    | 1 |
| IPR004579     | 1.18 | 1.18 | 0    | 0    | 1 |
| IPR012446     | 1.62 | 1.62 | 0    | 0    | 1 |
| IPR009671     | 1.25 | 0    | 1.25 | 0    | 1 |
| IPR001124     | 6    | 6    | 0    | 0    | 1 |
| IPR021569     | 1.02 | 1.02 | 0    | 0    | 1 |
| IPR021566     | 2.8  | 2.8  | 0    | 0    | 1 |
| IPR021567     | 1.7  | 1.7  | 0    | 0    | 1 |
| IPR021563     | 1.9  | 1.9  | 0    | 0    | 1 |
| IPR022036     | 2    | 2    | 0    | 0    | 1 |

|                |       |       |      |      |   |
|----------------|-------|-------|------|------|---|
| IPR022035      | 1.45  | 1.45  | 0    | 0    | 1 |
| IPR022031      | 1.14  | 1.14  | 0    | 0    | 1 |
| IPR009095      | 2     | 2     | 0    | 0    | 1 |
| IPR007946      | 1.15  | 1.15  | 0    | 0    | 1 |
| IPR007943      | 6.71  | 6.71  | 0    | 0    | 1 |
| PF11107        | 1.55  | 1.55  | 0    | 0    | 1 |
| PTHR12653      | 1.14  | 1.14  | 0    | 0    | 1 |
| IPR012852      | 4.78  | 5.25  | 0    | 1    | 1 |
| IPR012853      | 1.31  | 1     | 1.31 | 0    | 1 |
| PF11812        | 1.04  | 0     | 1.04 | 0    | 1 |
| IPR017906      | 1     | 1     | 0    | 0    | 1 |
| IPR003506      | 1     | 0     | 1    | 0    | 1 |
| IPR020098      | 1     | 0     | 1    | 0    | 1 |
| IPR018748      | 2.11  | 0     | 2.11 | 0    | 1 |
| IPR021767      | 1.05  | 0     | 1.05 | 0    | 1 |
| IPR021765      | 10.09 | 10.09 | 0    | 0    | 1 |
| IPR021763      | 1.14  | 1.83  | 1.05 | 0    | 1 |
| IPR021760      | 1.73  | 0     | 1.73 | 0    | 1 |
| IPR021761      | 1.5   | 1.5   | 0    | 0    | 1 |
| IPR022237      | 1.46  | 2.5   | 1.04 | 0    | 1 |
| IPR022238      | 1.12  | 1.12  | 0    | 0    | 1 |
| PTHR21520      | 1.13  | 1.13  | 0    | 0    | 1 |
| PTHR21528      | 1.38  | 1.38  | 0    | 0    | 1 |
| IPR008876      | 1.44  | 0     | 1.44 | 0    | 1 |
| IPR013665      | 1.14  | 1.14  | 0    | 0    | 1 |
| PF04347        | 1.04  | 0     | 1.04 | 0    | 1 |
| IPR003425      | 1.48  | 3.8   | 1.45 | 0    | 1 |
| IPR016179      | 7.03  | 7.03  | 0    | 0    | 1 |
| IPR008468      | 1.29  | 1.29  | 0    | 0    | 1 |
| IPR013619      | 1.48  | 0     | 1.48 | 0    | 1 |
| IPR008462      | 1.71  | 1.12  | 1.73 | 1    | 1 |
| IPR008465      | 1.71  | 1.71  | 0    | 0    | 1 |
| IPR021242      | 1.24  | 0     | 1.24 | 0    | 1 |
| IPR021245      | 5.62  | 0     | 5.62 | 0    | 1 |
| IPR021247      | 1.66  | 0     | 1.67 | 1    | 1 |
| IPR008796      | 2.38  | 2.38  | 0    | 0    | 1 |
| IPR008794      | 1.69  | 1.86  | 1.67 | 1.5  | 1 |
| IPR018468      | 1.56  | 1.56  | 0    | 0    | 1 |
| PF11762        | 1.17  | 0     | 1.17 | 0    | 1 |
| PF12153        | 1.43  | 1.43  | 0    | 0    | 1 |
| TIGR01526      | 1     | 0     | 1    | 0    | 1 |
| IPR006973      | 1.11  | 1.11  | 0    | 0    | 1 |
| IPR006975      | 1     | 0     | 1    | 0    | 1 |
| IPR006978      | 1.41  | 0     | 0    | 1.41 | 1 |
| IPR010732      | 1.77  | 0     | 1.77 | 0    | 1 |
| IPR012899      | 2.1   | 0     | 2.1  | 0    | 1 |
| IPR001377      | 1.41  | 1.64  | 0    | 1.02 | 1 |
| IPR019131      | 2.07  | 2.07  | 0    | 0    | 1 |
| IPR019132      | 1.65  | 1.65  | 0    | 0    | 1 |
| IPR019133      | 1.43  | 1.55  | 1    | 0    | 1 |
| IPR021485      | 1.24  | 0     | 1.24 | 0    | 1 |
| PTHR15722:SF3  | 1.1   | 1.1   | 0    | 0    | 1 |
| IPR021542      | 1.11  | 0     | 1.11 | 0    | 1 |
| IPR007539      | 1.34  | 0     | 1.34 | 0    | 1 |
| IPR007538      | 1.52  | 0     | 1.52 | 0    | 1 |
| IPR007535      | 1.96  | 2.54  | 1.82 | 0    | 1 |
| IPR007534      | 1.06  | 0     | 1.05 | 1.33 | 1 |
| PF07084        | 2.36  | 2.36  | 0    | 0    | 1 |
| IPR019277      | 1.06  | 0     | 1.07 | 1    | 1 |
| IPR019271      | 1.42  | 0     | 1.33 | 1.5  | 1 |
| IPR005027      | 4.92  | 4.92  | 0    | 0    | 1 |
| IPR005026      | 3.35  | 3.35  | 0    | 0    | 1 |
| PTHR14494      | 1     | 1     | 0    | 0    | 1 |
| PTHR15726      | 1.17  | 1.17  | 0    | 0    | 1 |
| PTHR21177      | 1     | 1     | 0    | 0    | 1 |
| PTHR11558:SF11 | 1     | 0     | 1    | 0    | 1 |
| IPR020784      | 1     | 1     | 1    | 0    | 1 |
| IPR021072      | 15.8  | 15.8  | 0    | 0    | 1 |
| IPR005621      | 1.01  | 0     | 1.01 | 1    | 1 |

|                |       |       |      |      |   |
|----------------|-------|-------|------|------|---|
| IPR022133      | 1.03  | 0     | 1.03 | 0    | 1 |
| PF04188        | 1.2   | 1.23  | 1.13 | 1    | 1 |
| IPR013100      | 1.63  | 0     | 1.63 | 0    | 1 |
| PF10858        | 1     | 0     | 1    | 1    | 1 |
| PF06765        | 2.17  | 2.17  | 0    | 0    | 1 |
| IPR018953      | 1.04  | 0     | 1.04 | 0    | 1 |
| PF11895        | 1     | 1     | 0    | 0    | 1 |
| PF11890        | 1.01  | 0     | 1.01 | 0    | 1 |
| PF11893        | 1.15  | 0     | 1.15 | 0    | 1 |
| IPR008008      | 2.22  | 1     | 2.38 | 0    | 1 |
| PTHR23160      | 4.32  | 4.5   | 0    | 1    | 1 |
| IPR009685      | 1.19  | 1.19  | 0    | 0    | 1 |
| PTHR22613      | 1     | 1     | 0    | 0    | 1 |
| TIGR02487      | 1.09  | 1     | 1.1  | 1    | 1 |
| PTHR22619      | 2.2   | 2.38  | 1    | 0    | 1 |
| IPR013215      | 1.09  | 1.54  | 1.05 | 1.06 | 1 |
| IPR013696      | 1.51  | 0     | 0    | 1.51 | 1 |
| IPR013692      | 1.04  | 0     | 1.04 | 0    | 1 |
| IPR009733      | 5.67  | 5.67  | 0    | 0    | 1 |
| IPR009732      | 1.1   | 1     | 1.1  | 0    | 1 |
| IPR014123      | 1.05  | 1     | 1.05 | 0    | 1 |
| IPR014788      | 2     | 2     | 0    | 0    | 1 |
| IPR014789      | 1.55  | 1.55  | 0    | 0    | 1 |
| IPR014874      | 1.92  | 0     | 1.92 | 0    | 1 |
| IPR014873      | 4.05  | 4.05  | 0    | 0    | 1 |
| IPR014879      | 1.13  | 0     | 1.13 | 0    | 1 |
| IPR012959      | 1.08  | 1.08  | 0    | 0    | 1 |
| IPR011893      | 1.88  | 2.25  | 1    | 1.11 | 1 |
| PF11918        | 1.4   | 1.4   | 0    | 0    | 1 |
| IPR015300      | 1     | 0     | 1    | 0    | 1 |
| IPR019487      | 1     | 1     | 0    | 0    | 1 |
| IPR014740      | 1     | 0     | 1    | 0    | 1 |
| PF09934        | 1     | 1     | 1    | 0    | 1 |
| PTHR22795      | 1.25  | 1.25  | 0    | 0    | 1 |
| PTHR21440      | 1.88  | 1.88  | 0    | 0    | 1 |
| IPR005568      | 1.82  | 1.82  | 0    | 0    | 1 |
| IPR006196      | 1.21  | 1.13  | 1.22 | 1.27 | 1 |
| IPR006195      | 1.1   | 1     | 1.12 | 1    | 1 |
| IPR006190      | 1     | 0     | 1    | 1    | 1 |
| PTHR15950      | 1.5   | 1.5   | 0    | 0    | 1 |
| IPR007313      | 1.03  | 0     | 1.03 | 1    | 1 |
| IPR013551      | 1.02  | 1     | 1.02 | 0    | 1 |
| IPR013558      | 3.73  | 3.73  | 0    | 0    | 1 |
| IPR021360      | 6.74  | 0     | 6.36 | 15   | 1 |
| IPR005318      | 3.67  | 0     | 3.67 | 0    | 1 |
| IPR005310      | 1     | 0     | 1    | 0    | 1 |
| IPR004953      | 1.95  | 1.95  | 0    | 0    | 1 |
| PF12052        | 4.71  | 4.71  | 0    | 0    | 1 |
| PTHR15904:SF2  | 1.25  | 1.25  | 0    | 0    | 1 |
| PF02523        | 1     | 0     | 1    | 0    | 1 |
| IPR006838      | 1.8   | 2.24  | 1.03 | 0    | 1 |
| PTHR14146      | 1.77  | 1.77  | 0    | 0    | 1 |
| PTHR23213:SF27 | 1.25  | 1.5   | 1    | 0    | 1 |
| PF10961        | 1.4   | 1.4   | 0    | 0    | 1 |
| PTHR12272      | 1.29  | 1.29  | 0    | 0    | 1 |
| IPR001437      | 3.36  | 1     | 3.37 | 0    | 1 |
| IPR004011      | 35.5  | 35.5  | 0    | 0    | 1 |
| TIGR03590      | 1.03  | 0     | 1.03 | 1    | 1 |
| IPR021613      | 3.25  | 3.25  | 0    | 0    | 1 |
| PTHR21631      | 1.02  | 1     | 1.03 | 0    | 1 |
| IPR018740      | 1.52  | 1     | 1.53 | 0    | 1 |
| IPR018745      | 1.67  | 1     | 1.69 | 0    | 1 |
| IPR015249      | 1.5   | 1.5   | 0    | 0    | 1 |
| IPR015247      | 1.4   | 1.4   | 0    | 0    | 1 |
| IPR015242      | 1.04  | 1.04  | 0    | 0    | 1 |
| PTHR11351      | 1     | 1     | 1    | 0    | 1 |
| IPR006761      | 2.23  | 2.23  | 0    | 0    | 1 |
| IPR006766      | 12.88 | 14.57 | 1    | 0    | 1 |
| IPR002866      | 1.71  | 1.71  | 0    | 0    | 1 |



|                |      |      |      |      |   |
|----------------|------|------|------|------|---|
| IPR002864      | 1.43 | 5.8  | 1.17 | 0    | 1 |
| IPR003196      | 1.41 | 1.41 | 0    | 0    | 1 |
| IPR000424      | 2.09 | 1.82 | 2.11 | 0    | 1 |
| IPR010981      | 2.24 | 0    | 2.24 | 0    | 1 |
| IPR003730      | 1.05 | 2    | 1.05 | 0    | 1 |
| IPR003735      | 1.73 | 1    | 1.74 | 1    | 1 |
| PTHR18914:SF1  | 1    | 1    | 0    | 0    | 1 |
| IPR000525      | 1.75 | 1    | 1.76 | 0    | 1 |
| IPR008081      | 2.28 | 2.28 | 0    | 0    | 1 |
| IPR004856      | 2.08 | 2.08 | 0    | 0    | 1 |
| IPR005109      | 2.87 | 2.93 | 1    | 0    | 1 |
| IPR009686      | 1.72 | 1.72 | 0    | 0    | 1 |
| PD334079       | 1.5  | 1.5  | 0    | 0    | 1 |
| IPR009359      | 1.09 | 1    | 1.09 | 1    | 1 |
| IPR009358      | 2    | 0    | 2    | 0    | 1 |
| IPR011111      | 2.67 | 2    | 2.68 | 0    | 1 |
| IPR014549      | 1.09 | 0    | 1.09 | 0    | 1 |
| PTHR13806:SF9  | 1.25 | 2    | 1    | 0    | 1 |
| IPR010648      | 1.04 | 0    | 1.04 | 0    | 1 |
| IPR010640      | 1.34 | 1.67 | 1.26 | 0    | 1 |
| IPR010644      | 1.05 | 0    | 1.05 | 1    | 1 |
| PTHR21344      | 1.95 | 1.95 | 0    | 0    | 1 |
| PTHR10074:SF23 | 2.88 | 2.88 | 0    | 0    | 1 |
| PTHR23155:SF22 | 4    | 4.75 | 1    | 0    | 1 |
| IPR007165      | 1.18 | 0    | 1.19 | 1    | 1 |
| IPR007161      | 1.31 | 0    | 1.4  | 1.17 | 1 |
| IPR019341      | 1.13 | 1.13 | 0    | 0    | 1 |
| IPR021135      | 1.19 | 5.91 | 1.07 | 1    | 1 |
| IPR019629      | 1.31 | 0    | 1.31 | 0    | 1 |
| IPR019623      | 1.07 | 1.07 | 0    | 0    | 1 |
| IPR021798      | 1.09 | 0    | 1.09 | 1    | 1 |
| IPR021797      | 1.11 | 1    | 1.12 | 0    | 1 |
| IPR021792      | 3    | 3    | 0    | 0    | 1 |
| IPR021865      | 1.17 | 0    | 1.17 | 0    | 1 |
| IPR021866      | 1.58 | 0    | 1.6  | 1.25 | 1 |
| IPR021863      | 2.54 | 2.87 | 1    | 0    | 1 |
| PTHR10763      | 1    | 1    | 0    | 0    | 1 |
| IPR018285      | 1    | 1    | 0    | 0    | 1 |
| IPR009800      | 3.14 | 3.14 | 0    | 0    | 1 |
| IPR007403      | 1.03 | 0    | 1.03 | 1    | 1 |
| IPR007402      | 1.12 | 1.5  | 1.03 | 0    | 1 |
| PTHR18968      | 1    | 1    | 1    | 1    | 1 |
| PTHR18905:SF3  | 3.33 | 3.33 | 0    | 0    | 1 |
| PTHR18905:SF4  | 1.14 | 1.14 | 0    | 0    | 1 |
| PF11997        | 1.09 | 1    | 1.09 | 0    | 1 |
| PTHR13179      | 1    | 1    | 0    | 0    | 1 |
| PTHR11889:SF3  | 1.5  | 0    | 1.5  | 0    | 1 |
| IPR008763      | 1.05 | 0    | 1.05 | 0    | 1 |
| PF10485        | 1.2  | 1.2  | 0    | 0    | 1 |
| PTHR23048      | 2.53 | 2.53 | 0    | 0    | 1 |
| PTHR11695:SF34 | 1.38 | 1.53 | 1    | 0    | 1 |
| PTHR22713      | 1.83 | 1.83 | 0    | 0    | 1 |
| PTHR22710      | 2.33 | 2.33 | 0    | 0    | 1 |
| IPR004901      | 4.47 | 6.56 | 1    | 1.4  | 1 |
| IPR006110      | 1.04 | 1.28 | 1.02 | 1    | 1 |
| IPR007648      | 1.75 | 1.77 | 1    | 0    | 1 |
| IPR003540      | 1    | 0    | 1    | 0    | 1 |
| IPR013262      | 1    | 1    | 0    | 0    | 1 |
| IPR013260      | 1.2  | 1.2  | 0    | 0    | 1 |
| IPR007392      | 1.62 | 1    | 1.65 | 1.11 | 1 |
| IPR007398      | 1    | 0    | 1    | 0    | 1 |
| PD531162       | 1.17 | 0    | 1.17 | 0    | 1 |
| IPR012604      | 5    | 5    | 0    | 0    | 1 |
| IPR018850      | 1.04 | 1.04 | 0    | 0    | 1 |
| IPR005531      | 2.68 | 0    | 2.68 | 0    | 1 |
| IPR019457      | 1    | 0    | 1    | 0    | 1 |
| IPR020217      | 1    | 0    | 1    | 0    | 1 |
| IPR002085      | 1.17 | 1.42 | 1    | 1    | 1 |
| IPR010474      | 1.53 | 1.53 | 0    | 0    | 1 |

|                |      |      |      |      |   |
|----------------|------|------|------|------|---|
| IPR010471      | 3.75 | 3.75 | 0    | 0    | 1 |
| IPR014932      | 1.56 | 1.56 | 0    | 0    | 1 |
| IPR013926      | 1.11 | 1.17 | 0    | 1    | 1 |
| PTHR11260      | 1.25 | 1.48 | 1.2  | 0    | 1 |
| IPR003021      | 1.22 | 1.22 | 0    | 0    | 1 |
| PTHR12764      | 2.25 | 2.25 | 0    | 0    | 1 |
| IPR004349      | 1.33 | 0    | 1.27 | 2    | 1 |
| IPR004341      | 1.75 | 0    | 1.75 | 0    | 1 |
| IPR004340      | 1.18 | 1.18 | 0    | 0    | 1 |
| IPR004342      | 3.28 | 3.28 | 0    | 0    | 1 |
| TIGR01603      | 1.32 | 0    | 1.32 | 0    | 1 |
| IPR008442      | 1.06 | 1.06 | 0    | 0    | 1 |
| IPR008441      | 1.17 | 1.36 | 1.08 | 0    | 1 |
| PTHR22901      | 1    | 0    | 1    | 0    | 1 |
| IPR022346      | 1.83 | 1    | 1.83 | 0    | 1 |
| PTHR10241:SF11 | 1.25 | 1.25 | 0    | 0    | 1 |
| IPR010906      | 1.53 | 0    | 1.53 | 0    | 1 |
| IPR010907      | 2.2  | 0    | 2.2  | 0    | 1 |
| IPR010908      | 2    | 2    | 0    | 0    | 1 |
| IPR007059      | 2.12 | 0    | 2.16 | 1    | 1 |
| IPR013769      | 5.23 | 5.23 | 0    | 0    | 1 |
| IPR021087      | 2.11 | 0    | 2.11 | 0    | 1 |
| IPR021083      | 1    | 1    | 0    | 0    | 1 |
| IPR008555      | 1.96 | 2    | 1    | 0    | 1 |
| IPR000200      | 1.64 | 0    | 1.64 | 0    | 1 |
| IPR012417      | 7.57 | 7.57 | 0    | 0    | 1 |
| PF11651        | 1.09 | 0    | 1.09 | 0    | 1 |
| PD056452       | 1    | 0    | 1    | 0    | 1 |
| PF04171        | 1.4  | 0    | 1.41 | 1    | 1 |
| IPR020040      | 2.19 | 3.97 | 2.02 | 2    | 1 |
| PTHR10668:SF5  | 1.05 | 1.5  | 1    | 1    | 1 |
| TIGR03491      | 1.04 | 0    | 1.04 | 0    | 1 |
| IPR021711      | 1.6  | 1.6  | 0    | 0    | 1 |
| PTHR23223:SF21 | 1.12 | 1.12 | 0    | 0    | 1 |
| TIGR02457      | 1    | 0    | 1    | 0    | 1 |
| IPR008828      | 1.6  | 1.6  | 0    | 0    | 1 |
| PTHR21066      | 4.27 | 4.27 | 0    | 0    | 1 |
| IPR008826      | 1.23 | 1.55 | 1.05 | 1    | 1 |
| IPR006687      | 1.66 | 1.66 | 0    | 0    | 1 |
| IPR007486      | 1.09 | 0    | 1.09 | 0    | 1 |
| IPR007488      | 1.37 | 0    | 1.37 | 0    | 1 |
| IPR003473      | 1.04 | 1.25 | 1.03 | 1.06 | 1 |
| IPR010758      | 1.12 | 0    | 1.12 | 0    | 1 |
| PTHR12336      | 5.93 | 5.93 | 0    | 0    | 1 |
| PTHR12331      | 2.89 | 2.89 | 0    | 0    | 1 |
| IPR019348      | 1.19 | 1.19 | 0    | 0    | 1 |
| IPR005224      | 1.04 | 1.5  | 1.03 | 1.12 | 1 |
| IPR005226      | 1.04 | 1.44 | 1.02 | 1    | 1 |
| IPR002794      | 1.12 | 1.32 | 1.03 | 1    | 1 |
| PF11751        | 4.74 | 0    | 4.74 | 0    | 1 |
| PF12122        | 1    | 0    | 1    | 0    | 1 |
| IPR010764      | 1    | 1    | 1    | 0    | 1 |
| PTHR14304:SF2  | 1.5  | 1.5  | 0    | 0    | 1 |
| PTHR21269      | 1.08 | 1.08 | 0    | 0    | 1 |
| IPR021906      | 1.68 | 1.68 | 0    | 0    | 1 |
| IPR021905      | 1    | 1    | 0    | 0    | 1 |
| PF09983        | 1.08 | 2    | 1.07 | 0    | 1 |
| IPR009926      | 1.06 | 0    | 1.06 | 0    | 1 |
| PD498860       | 1    | 0    | 1    | 0    | 1 |
| IPR007568      | 9.03 | 9.03 | 0    | 0    | 1 |
| PF05536        | 1.59 | 1.59 | 0    | 0    | 1 |
| PF05534        | 1.35 | 0    | 1.35 | 0    | 1 |
| PTHR14194      | 1    | 1    | 1    | 0    | 1 |
| IPR011606      | 1.33 | 1    | 1.33 | 1    | 1 |
| TIGR03277      | 1    | 0    | 0    | 1    | 1 |
| IPR000751      | 4.17 | 4.17 | 0    | 0    | 1 |
| PTHR12126:SF1  | 1.1  | 1    | 1.2  | 0    | 1 |
| IPR000289      | 1.33 | 1.56 | 0    | 1    | 1 |
| IPR015853      | 1.04 | 0    | 1.04 | 0    | 1 |

|                |       |       |      |    |   |
|----------------|-------|-------|------|----|---|
| IPR015857      | 1     | 0     | 1    | 0  | 1 |
| IPR015859      | 1.03  | 0     | 1.03 | 0  | 1 |
| IPR021005      | 2     | 0     | 2    | 0  | 1 |
| IPR021000      | 1     | 1     | 0    | 0  | 1 |
| IPR012492      | 1.42  | 1.42  | 0    | 0  | 1 |
| IPR001153      | 4.5   | 4.5   | 0    | 0  | 1 |
| IPR001152      | 3.76  | 3.76  | 0    | 0  | 1 |
| PTHR11076:SF12 | 1     | 0     | 1    | 0  | 1 |
| PF12391        | 1.01  | 0     | 1.01 | 0  | 1 |
| IPR019710      | 2.4   | 0     | 2.4  | 0  | 1 |
| IPR015144      | 1.08  | 0     | 1.08 | 0  | 1 |
| IPR022067      | 4.86  | 4.86  | 0    | 0  | 1 |
| IPR010533      | 1.2   | 1.2   | 0    | 0  | 1 |
| IPR010536      | 4.14  | 4.14  | 0    | 0  | 1 |
| IPR012578      | 1     | 1     | 0    | 0  | 1 |
| PTHR11968      | 1.14  | 1.12  | 1.2  | 1  | 1 |
| IPR012435      | 3     | 3     | 0    | 0  | 1 |
| IPR007969      | 7.91  | 0     | 7.91 | 0  | 1 |
| PTHR10168:SF16 | 1.1   | 1.1   | 0    | 0  | 1 |
| IPR010852      | 2.25  | 0     | 2.25 | 0  | 1 |
| PTHR12609      | 1.16  | 1.16  | 0    | 0  | 1 |
| IPR002583      | 1.02  | 1.12  | 1.01 | 0  | 1 |
| PTHR12603      | 2.31  | 2.31  | 0    | 0  | 1 |
| PTHR12601      | 1.7   | 1.7   | 0    | 0  | 1 |
| PTHR10795:SF17 | 7.57  | 7.57  | 0    | 0  | 1 |
| IPR018907      | 1     | 1     | 0    | 0  | 1 |
| PTHR23289      | 1     | 1     | 1    | 0  | 1 |
| PF10024        | 1.13  | 0     | 1.13 | 0  | 1 |
| PTHR23133      | 1     | 0     | 1    | 0  | 1 |
| PTHR23135      | 1     | 0     | 1    | 0  | 1 |
| IPR004204      | 1.76  | 1.76  | 0    | 0  | 1 |
| PTHR21576      | 1.14  | 1.14  | 0    | 0  | 1 |
| PTHR15032:SF2  | 1.36  | 1.44  | 1    | 0  | 1 |
| IPR006607      | 3     | 3     | 0    | 0  | 1 |
| IPR006608      | 4.86  | 4.86  | 0    | 0  | 1 |
| IPR007394      | 1.02  | 0     | 1.02 | 0  | 1 |
| PTHR10730:SF1  | 1.5   | 1.6   | 1    | 0  | 1 |
| IPR007260      | 1.15  | 0     | 1.15 | 0  | 1 |
| IPR007265      | 1.19  | 1.19  | 0    | 0  | 1 |
| IPR013390      | 1.13  | 0     | 1.13 | 0  | 1 |
| PTHR14398      | 1.17  | 1.17  | 0    | 0  | 1 |
| IPR013645      | 2.44  | 0     | 2.44 | 0  | 1 |
| IPR013647      | 1.5   | 0     | 1.51 | 1  | 1 |
| IPR004711      | 1.28  | 0     | 1.28 | 1  | 1 |
| PTHR22985:SF54 | 1     | 1     | 0    | 0  | 1 |
| IPR009496      | 3.75  | 3.75  | 0    | 0  | 1 |
| IPR009493      | 1.07  | 0     | 1.07 | 0  | 1 |
| IPR019690      | 1.11  | 0     | 1.11 | 0  | 1 |
| IPR011094      | 2.33  | 3     | 2.33 | 2  | 1 |
| PTHR10488      | 1.58  | 2.2   | 1.14 | 0  | 1 |
| IPR014112      | 1.11  | 1     | 1.12 | 0  | 1 |
| PF11838        | 1.24  | 0     | 1.24 | 0  | 1 |
| PTHR10223      | 1.3   | 1.3   | 0    | 0  | 1 |
| IPR015013      | 3     | 3     | 0    | 0  | 1 |
| IPR014804      | 2     | 2     | 0    | 0  | 1 |
| IPR006458      | 24.14 | 24.14 | 0    | 0  | 1 |
| PTHR22814:SF14 | 2.5   | 2.5   | 0    | 0  | 1 |
| PTHR23110:SF2  | 1.6   | 1.6   | 0    | 0  | 1 |
| PF09908        | 1.26  | 0     | 1.26 | 0  | 1 |
| IPR015407      | 2.17  | 2.17  | 0    | 0  | 1 |
| IPR015409      | 1.02  | 1     | 1.02 | 0  | 1 |
| IPR018631      | 3.97  | 0     | 3.41 | 22 | 1 |
| IPR018633      | 1.05  | 0     | 1.05 | 1  | 1 |
| IPR022182      | 1     | 0     | 1    | 0  | 1 |
| IPR021986      | 1.83  | 2.7   | 1.15 | 0  | 1 |
| PF12504        | 5.38  | 5.38  | 0    | 0  | 1 |
| IPR001050      | 2.68  | 2.68  | 0    | 0  | 1 |
| IPR007872      | 1.97  | 2     | 1    | 0  | 1 |
| IPR007874      | 1.02  | 0     | 1.02 | 0  | 1 |

|                |      |      |      |      |   |
|----------------|------|------|------|------|---|
| IPR007875      | 3.17 | 3.17 | 0    | 0    | 1 |
| IPR002993      | 1.33 | 1.33 | 0    | 0    | 1 |
| IPR006472      | 1.23 | 0    | 1.23 | 1    | 1 |
| IPR010836      | 1.62 | 1    | 1.63 | 0    | 1 |
| IPR010835      | 1.08 | 1.33 | 1.08 | 0    | 1 |
| IPR000592      | 1.35 | 1.58 | 1    | 1.02 | 1 |
| PF07386        | 1.22 | 1.78 | 1.19 | 0    | 1 |
| IPR013561      | 3.18 | 0    | 0    | 3.18 | 1 |
| IPR019228      | 1.14 | 0    | 1.14 | 0    | 1 |
| IPR019224      | 1.18 | 0    | 1.15 | 1.22 | 1 |
| IPR019223      | 1.61 | 0    | 1.61 | 0    | 1 |
| IPR002691      | 1.97 | 1.97 | 0    | 0    | 1 |
| IPR002699      | 1.29 | 1.6  | 1.11 | 1.11 | 1 |
| IPR004960      | 1.98 | 1    | 1.98 | 0    | 1 |
| PF12000        | 1.16 | 0    | 1.16 | 0    | 1 |
| IPR011687      | 1.27 | 1.27 | 0    | 0    | 1 |
| PF04955        | 1.31 | 1    | 1.32 | 0    | 1 |
| PTHR10432:SF62 | 1    | 1    | 1    | 0    | 1 |
| IPR010487      | 1.15 | 1.15 | 0    | 0    | 1 |
| IPR010483      | 1.32 | 1.32 | 0    | 0    | 1 |
| IPR010152      | 1.07 | 0    | 1.08 | 1    | 1 |
| PTHR21103      | 1.5  | 1.5  | 0    | 0    | 1 |
| PTHR21104      | 1.93 | 1.93 | 0    | 0    | 1 |
| IPR002087      | 2.97 | 2.97 | 0    | 0    | 1 |
| IPR019028      | 3.86 | 3.86 | 0    | 0    | 1 |
| IPR019024      | 1.17 | 1.17 | 0    | 0    | 1 |
| IPR019025      | 3.6  | 3.6  | 0    | 0    | 1 |
| IPR015236      | 1    | 0    | 0    | 1    | 1 |
| IPR015233      | 2.12 | 0    | 2.12 | 0    | 1 |
| IPR015230      | 1    | 0    | 1    | 0    | 1 |
| IPR015239      | 1    | 0    | 1    | 0    | 1 |
| TIGR03032      | 1.15 | 0    | 1.15 | 0    | 1 |
| PTHR21663      | 1.31 | 1.31 | 0    | 0    | 1 |
| IPR008910      | 2.04 | 0    | 2.01 | 2.37 | 1 |
| IPR009066      | 1.3  | 1.3  | 0    | 0    | 1 |
| IPR011442      | 1.74 | 1.74 | 0    | 0    | 1 |
| IPR005899      | 1.3  | 1    | 1.31 | 1    | 1 |
| IPR014937      | 1.15 | 1    | 1.16 | 1    | 1 |
| IPR010315      | 2.27 | 0    | 2.27 | 0    | 1 |
| IPR010312      | 1.05 | 0    | 1.05 | 0    | 1 |
| IPR013928      | 1    | 1    | 0    | 0    | 1 |
| IPR000417      | 1.09 | 1.12 | 1.09 | 1.06 | 1 |
| IPR013158      | 9.42 | 11.1 | 1    | 0    | 1 |
| PTHR21495:SF1  | 1.09 | 1.09 | 0    | 0    | 1 |
| IPR005133      | 1.24 | 0    | 1.21 | 1.73 | 1 |
| PTHR13043      | 1.35 | 1.35 | 0    | 0    | 1 |
| PTHR23202      | 1    | 1    | 0    | 0    | 1 |
| PTHR10534      | 1.25 | 1.43 | 1    | 0    | 1 |
| PTHR14095      | 2.34 | 2.34 | 0    | 0    | 1 |
| TIGR01198      | 1.04 | 1.33 | 1.01 | 0    | 1 |
| PTHR21666:SF4  | 1.89 | 0    | 1.89 | 0    | 1 |
| PTHR11129:SF1  | 1    | 1    | 0    | 0    | 1 |
| PTHR23155:SF15 | 3    | 3    | 0    | 0    | 1 |
| IPR007156      | 1.27 | 0    | 1.27 | 1.17 | 1 |
| IPR007152      | 1.25 | 0    | 1.07 | 1.35 | 1 |
| IPR021164      | 3.12 | 3.12 | 0    | 0    | 1 |
| IPR012599      | 3.11 | 3.11 | 0    | 0    | 1 |
| PTHR22501      | 1.33 | 1.33 | 0    | 0    | 1 |
| PTHR22506      | 1.4  | 1.4  | 0    | 0    | 1 |
| IPR021830      | 1.19 | 1    | 1.2  | 1    | 1 |
| IPR021836      | 1.12 | 1.04 | 1.16 | 0    | 1 |
| IPR003841      | 2.36 | 4.82 | 2.27 | 2    | 1 |
| IPR003844      | 1.11 | 1    | 1.1  | 1.5  | 1 |
| IPR014884      | 1.2  | 0    | 1.2  | 0    | 1 |
| IPR014881      | 1.09 | 1.09 | 0    | 0    | 1 |
| IPR014880      | 1.6  | 0    | 1.6  | 0    | 1 |
| IPR012909      | 1.05 | 0    | 1.05 | 0    | 1 |
| IPR012906      | 1.15 | 0    | 1.12 | 1.67 | 1 |
| PTHR11751:SF10 | 1    | 0    | 1    | 0    | 1 |

|                 |      |      |      |      |   |
|-----------------|------|------|------|------|---|
| IPR004188       | 1.02 | 0    | 1.02 | 0    | 1 |
| PTHR11697:SF17  | 1.67 | 1.67 | 0    | 0    | 1 |
| PF11946         | 1.03 | 0    | 1.03 | 0    | 1 |
| PF11949         | 1.06 | 0    | 1.06 | 0    | 1 |
| IPR006160       | 1.07 | 0    | 1.07 | 0    | 1 |
| IPR020993       | 1.14 | 1.17 | 1    | 0    | 1 |
| IPR007342       | 1.08 | 1.22 | 1.03 | 0    | 1 |
| IPR001978       | 6.62 | 6.78 | 1    | 0    | 1 |
| IPR018861       | 2.75 | 2.75 | 0    | 0    | 1 |
| IPR012652       | 1.02 | 0    | 1.02 | 1    | 1 |
| IPR021319       | 9.57 | 9.57 | 0    | 0    | 1 |
| IPR001023       | 1.17 | 1.33 | 1.11 | 0    | 1 |
| PF12080         | 1.14 | 0    | 1.14 | 0    | 1 |
| PF12081         | 1.07 | 0    | 1.07 | 0    | 1 |
| IPR010406       | 1.19 | 0    | 1.19 | 0    | 1 |
| IPR014960       | 1.22 | 0    | 1.24 | 1    | 1 |
| IPR014961       | 1.45 | 0    | 1.45 | 0    | 1 |
| IPR014963       | 1.08 | 0    | 1.08 | 0    | 1 |
| IPR014968       | 4.14 | 0    | 4.14 | 0    | 1 |
| PF11047         | 1.56 | 0    | 1.56 | 0    | 1 |
| PTHR11061:SF2   | 1    | 1    | 1    | 0    | 1 |
| PTHR10183:SF55  | 1    | 1    | 1    | 0    | 1 |
| PTHR18958:SF18: | 1    | 1    | 1    | 0    | 1 |
| IPR021663       | 2.56 | 2.56 | 0    | 0    | 1 |
| IPR021662       | 3.56 | 3.56 | 0    | 0    | 1 |
| IPR021660       | 1.02 | 1.25 | 1    | 0    | 1 |
| IPR021666       | 1.4  | 1.4  | 0    | 0    | 1 |
| IPR021665       | 1.37 | 1.37 | 0    | 0    | 1 |
| IPR005817       | 9.68 | 9.68 | 0    | 0    | 1 |
| IPR006738       | 2.64 | 2.64 | 0    | 0    | 1 |
| IPR007069       | 2.49 | 1    | 2.53 | 1    | 1 |
| IPR007064       | 1.24 | 1.39 | 1    | 1.05 | 1 |
| IPR001722       | 2.92 | 2.92 | 0    | 0    | 1 |
| IPR017908       | 1    | 0    | 1    | 0    | 1 |
| IPR016054       | 6.67 | 6.67 | 0    | 0    | 1 |
| IPR005495       | 2.1  | 1    | 2.1  | 0    | 1 |
| IPR000238       | 1.03 | 1.21 | 1.02 | 0    | 1 |
| PF06179         | 1.2  | 1.2  | 0    | 0    | 1 |
| PTHR12979       | 1.12 | 1.12 | 0    | 0    | 1 |
| PTHR12977       | 1.2  | 1.2  | 0    | 0    | 1 |
| PD505916        | 1    | 0    | 1    | 0    | 1 |
| IPR009383       | 1.01 | 1    | 1.01 | 0    | 1 |
| IPR011258       | 1    | 1    | 1    | 0    | 1 |
| PF12320         | 1.01 | 0    | 1.02 | 1    | 1 |
| IPR008493       | 1.09 | 1.09 | 0    | 0    | 1 |
| IPR016755       | 1.02 | 1    | 1.02 | 0    | 1 |
| PTHR14898       | 1.57 | 1.57 | 0    | 0    | 1 |
| IPR010613       | 1.13 | 1.13 | 0    | 0    | 1 |
| PTHR21180:SF2   | 1    | 0    | 1    | 0    | 1 |
| PTHR12506       | 1.14 | 1.14 | 0    | 0    | 1 |
| PTHR14905:SF2   | 1.67 | 2.33 | 1    | 0    | 1 |
| PTHR21582       | 1.62 | 1.62 | 0    | 0    | 1 |
| PTHR21059       | 1.1  | 1.1  | 0    | 0    | 1 |
| IPR002171       | 2.25 | 4.53 | 2.03 | 2    | 1 |
| IPR011987       | 1.17 | 1.17 | 0    | 0    | 1 |
| IPR011986       | 1.38 | 0    | 1.37 | 2    | 1 |
| IPR009852       | 1.88 | 1.92 | 1    | 0    | 1 |
| PTHR19376:SF3   | 1    | 1    | 0    | 0    | 1 |
| IPR012980       | 4.67 | 4.67 | 0    | 0    | 1 |
| IPR007454       | 1.05 | 2.12 | 1.01 | 0    | 1 |
| IPR007450       | 1.48 | 1    | 1.48 | 0    | 1 |
| PTHR12341       | 1.64 | 1.64 | 0    | 0    | 1 |
| PTHR18939       | 1.5  | 1.67 | 1    | 0    | 1 |
| PTHR13129       | 1.11 | 1.11 | 0    | 0    | 1 |
| IPR019093       | 1    | 0    | 1    | 0    | 1 |
| IPR019092       | 1.2  | 0    | 1.26 | 1    | 1 |
| PF12411         | 1.03 | 1.06 | 1.02 | 0    | 1 |
| IPR001141       | 1.45 | 1.45 | 0    | 0    | 1 |
| IPR019095       | 1.02 | 1.02 | 0    | 0    | 1 |

|                 |       |       |      |      |   |
|-----------------|-------|-------|------|------|---|
| IPR005643       | 2.19  | 2.19  | 0    | 0    | 1 |
| IPR005649       | 2.38  | 2.69  | 1    | 0    | 1 |
| IPR007614       | 10.86 | 10.86 | 0    | 0    | 1 |
| IPR013218       | 1.21  | 1.21  | 0    | 0    | 1 |
| PTHR22908:SF14  | 1.27  | 1.27  | 0    | 0    | 1 |
| IPR021392       | 1.75  | 1.75  | 0    | 0    | 1 |
| IPR019152       | 1.2   | 1.21  | 1    | 1    | 1 |
| IPR019150       | 1.38  | 1.38  | 0    | 0    | 1 |
| IPR015304       | 1.02  | 0     | 1.02 | 0    | 1 |
| IPR021979       | 1.06  | 0     | 1.06 | 1    | 1 |
| PTHR10670       | 1.5   | 1.5   | 0    | 0    | 1 |
| IPR018684       | 1.07  | 1     | 1.07 | 0    | 1 |
| IPR018683       | 2.12  | 0     | 2.12 | 0    | 1 |
| IPR009267       | 1.04  | 1     | 1.04 | 0    | 1 |
| IPR005567       | 1.5   | 1.5   | 0    | 0    | 1 |
| IPR005565       | 1.98  | 1     | 1.99 | 0    | 1 |
| IPR005560       | 1.68  | 3     | 1.65 | 0    | 1 |
| IPR002033       | 1.11  | 1.82  | 1.07 | 1.77 | 1 |
| IPR018352       | 9.04  | 9.04  | 0    | 0    | 1 |
| PTHR11474:SF1   | 2.42  | 2.6   | 1.5  | 0    | 1 |
| IPR013975       | 1.63  | 0     | 1.63 | 0    | 1 |
| IPR013972       | 1.39  | 0     | 1.39 | 0    | 1 |
| IPR013970       | 1.21  | 1.21  | 0    | 0    | 1 |
| IPR013971       | 4.6   | 0     | 0    | 4.6  | 1 |
| PF05978         | 3     | 3     | 0    | 0    | 1 |
| IPR000529       | 1.05  | 1.42  | 1.02 | 0    | 1 |
| PF06664         | 3.59  | 3.59  | 0    | 0    | 1 |
| IPR004313       | 1.25  | 1.62  | 1.05 | 0    | 1 |
| IPR008672       | 1.42  | 1.42  | 0    | 0    | 1 |
| IPR008675       | 2     | 2     | 0    | 0    | 1 |
| IPR005045       | 2.32  | 2.32  | 0    | 0    | 1 |
| PTHR23331       | 1.38  | 1.42  | 1    | 0    | 1 |
| PF11575         | 1.1   | 0     | 1.1  | 0    | 1 |
| PF11578         | 1.74  | 2.68  | 1.27 | 0    | 1 |
| IPR005185       | 1.9   | 1.16  | 2.02 | 2    | 1 |
| PTHR14430       | 1     | 1     | 0    | 0    | 1 |
| IPR009602       | 1.48  | 1.48  | 0    | 0    | 1 |
| IPR010382       | 1.49  | 0     | 1.49 | 0    | 1 |
| IPR007282       | 2.8   | 2.8   | 0    | 0    | 1 |
| IPR020899       | 1.36  | 0     | 1.36 | 0    | 1 |
| IPR017981       | 1.86  | 1.86  | 0    | 0    | 1 |
| PTHR12348:SF1   | 2     | 2     | 0    | 0    | 1 |
| IPR012461       | 4.75  | 6     | 1    | 0    | 1 |
| IPR009655       | 1     | 0     | 0    | 1    | 1 |
| PF12452         | 1.33  | 3.17  | 1    | 0    | 1 |
| IPR021581       | 1.14  | 1.14  | 0    | 0    | 1 |
| IPR022051       | 1.33  | 1.67  | 1.25 | 0    | 1 |
| IPR022058       | 5     | 5     | 0    | 0    | 1 |
| IPR004888       | 1.54  | 1.81  | 1.11 | 0    | 1 |
| IPR004889       | 1.88  | 0     | 0    | 1.88 | 1 |
| IPR004882       | 2.14  | 2.14  | 0    | 0    | 1 |
| IPR015110       | 1     | 0     | 1    | 0    | 1 |
| IPR015111       | 1.06  | 0     | 1.06 | 0    | 1 |
| PTHR23154:SF117 | 1.17  | 1.33  | 1    | 0    | 1 |
| IPR010562       | 25.68 | 25.68 | 0    | 0    | 1 |
| PTHR15326       | 1.85  | 1.85  | 0    | 0    | 1 |
| IPR007964       | 3.12  | 3.12  | 0    | 0    | 1 |
| PTHR11006       | 1.2   | 1.22  | 1    | 0    | 1 |
| IPR012876       | 12.83 | 12.83 | 0    | 0    | 1 |
| SM00085         | 3.29  | 3.29  | 0    | 0    | 1 |
| PF10019         | 1.84  | 2.24  | 1.62 | 0    | 1 |
| PTHR23104       | 2.56  | 2.56  | 0    | 0    | 1 |
| PTHR22050       | 1.71  | 1.71  | 0    | 0    | 1 |
| PTHR21713       | 1.6   | 1.6   | 0    | 0    | 1 |
| IPR009322       | 1.22  | 1     | 1.22 | 0    | 1 |
| PTHR22960       | 1     | 0     | 1    | 0    | 1 |
| IPR007181       | 1     | 0     | 0    | 1    | 1 |
| IPR007230       | 1.67  | 1.67  | 0    | 0    | 1 |
| IPR007232       | 1.43  | 1.66  | 1.04 | 0    | 1 |

|                |       |       |      |      |   |
|----------------|-------|-------|------|------|---|
| IPR007239      | 1.18  | 1.18  | 0    | 0    | 1 |
| IPR013675      | 1.02  | 0     | 1.02 | 0    | 1 |
| IPR013673      | 2.33  | 2.33  | 0    | 0    | 1 |
| IPR008407      | 1.3   | 0     | 1.3  | 1    | 1 |
| IPR008405      | 6     | 6     | 0    | 0    | 1 |
| IPR013679      | 3.62  | 4     | 1    | 0    | 1 |
| PF11873        | 1.08  | 0     | 1.08 | 0    | 1 |
| PF11709        | 1.07  | 1.07  | 0    | 0    | 1 |
| IPR005499      | 1     | 0     | 1    | 1    | 1 |
| PTHR21290:SF7  | 1.07  | 1.07  | 0    | 0    | 1 |
| IPR002724      | 1.13  | 0     | 1.17 | 1.07 | 1 |
| IPR002726      | 1     | 0     | 1    | 1    | 1 |
| IPR003893      | 3.82  | 3.82  | 0    | 0    | 1 |
| PTHR11702      | 1     | 1     | 0    | 0    | 1 |
| IPR010719      | 1.05  | 1.43  | 1.03 | 0    | 1 |
| PF10156        | 1.1   | 1.1   | 0    | 0    | 1 |
| IPR000817      | 4.54  | 4.54  | 0    | 0    | 1 |
| IPR000816      | 1.15  | 1.4   | 1.11 | 1    | 1 |
| PTHR12420      | 1.5   | 1.5   | 0    | 0    | 1 |
| IPR019148      | 1.2   | 1.2   | 0    | 0    | 1 |
| IPR019493      | 2.69  | 0     | 2.69 | 0    | 1 |
| IPR015331      | 1     | 0     | 1    | 0    | 1 |
| PTHR20837      | 1.9   | 1.9   | 0    | 0    | 1 |
| IPR019498      | 1.5   | 1.5   | 0    | 0    | 1 |
| IPR021463      | 1.08  | 1.08  | 0    | 0    | 1 |
| IPR018607      | 1.2   | 1.2   | 0    | 0    | 1 |
| IPR015382      | 3.5   | 3.5   | 0    | 0    | 1 |
| IPR015381      | 1.17  | 1.17  | 0    | 0    | 1 |
| PTHR11546      | 1.5   | 1.5   | 0    | 0    | 1 |
| PTHR12957:SF2  | 2.2   | 2.2   | 0    | 0    | 1 |
| PTHR12957:SF3  | 1.08  | 1.08  | 0    | 0    | 1 |
| IPR005578      | 1.55  | 1.55  | 0    | 0    | 1 |
| IPR010265      | 1.88  | 0     | 1.88 | 0    | 1 |
| IPR010269      | 1.9   | 0     | 1.9  | 0    | 1 |
| IPR010268      | 9.17  | 1     | 0    | 9.65 | 1 |
| IPR005573      | 1.01  | 0     | 1.01 | 0    | 1 |
| IPR007881      | 1.12  | 1.12  | 0    | 0    | 1 |
| IPR005572      | 1.05  | 1     | 1.05 | 0    | 1 |
| IPR010846      | 1.03  | 0     | 1.03 | 0    | 1 |
| IPR010845      | 1.27  | 0     | 1.27 | 0    | 1 |
| IPR010843      | 1.03  | 0     | 1.04 | 1    | 1 |
| PTHR21596:SF5  | 1.71  | 1.71  | 0    | 0    | 1 |
| IPR003611      | 1.55  | 1     | 2    | 0    | 1 |
| PF07355        | 1.88  | 0     | 1.88 | 0    | 1 |
| IPR004060      | 1.67  | 1.67  | 0    | 0    | 1 |
| IPR004938      | 14.29 | 14.29 | 0    | 0    | 1 |
| IPR004931      | 5     | 5     | 0    | 0    | 1 |
| IPR004934      | 3.21  | 3.21  | 0    | 0    | 1 |
| PF12038        | 1.05  | 1.1   | 1    | 0    | 1 |
| IPR011673      | 1.02  | 0     | 1.02 | 0    | 1 |
| IPR011671      | 1.15  | 1.15  | 0    | 0    | 1 |
| IPR011670      | 1.96  | 0     | 1.96 | 0    | 1 |
| IPR011674      | 1.44  | 0     | 1    | 1.58 | 1 |
| PF04984        | 1.56  | 1.5   | 1.56 | 1    | 1 |
| PTHR14127      | 1.7   | 1.7   | 0    | 0    | 1 |
| PTHR23228:SF13 | 2.75  | 2.75  | 0    | 0    | 1 |
| PTHR15741      | 1.11  | 1.11  | 0    | 0    | 1 |
| PF01847        | 1.35  | 1.36  | 1    | 0    | 1 |
| PTHR23227:SF1  | 2.67  | 2.67  | 0    | 0    | 1 |
| IPR005587      | 1.09  | 1     | 1.1  | 0    | 1 |
| IPR007711      | 1.48  | 0     | 1.48 | 0    | 1 |
| IPR007719      | 1.32  | 2.09  | 1.03 | 0    | 1 |
| TIGR02827      | 1     | 0     | 1    | 0    | 1 |
| IPR020101      | 2     | 2     | 0    | 0    | 1 |
| PTHR10684:SF3  | 1.29  | 1.29  | 0    | 0    | 1 |
| IPR021059      | 1     | 0     | 1    | 0    | 1 |
| IPR019053      | 1.51  | 1.51  | 0    | 0    | 1 |
| IPR019052      | 1.27  | 0     | 1.27 | 0    | 1 |
| IPR019059      | 1.14  | 0     | 1.14 | 0    | 1 |

|                 |       |       |      |      |   |
|-----------------|-------|-------|------|------|---|
| IPR002587       | 1.32  | 1.56  | 1.2  | 1.3  | 1 |
| IPR008920       | 1.04  | 1     | 1.04 | 0    | 1 |
| IPR013166       | 1.15  | 1     | 1.15 | 0    | 1 |
| PTHR19288       | 1.13  | 1.4   | 1    | 1    | 1 |
| PTHR19282       | 1.33  | 1.33  | 0    | 0    | 1 |
| PTHR15503       | 3.57  | 3.57  | 0    | 0    | 1 |
| IPR004215       | 1.04  | 0     | 1.04 | 0    | 1 |
| PF03869         | 1.39  | 0     | 1.39 | 0    | 1 |
| IPR005165       | 1.07  | 0     | 1.07 | 0    | 1 |
| IPR018978       | 1.09  | 1.14  | 0    | 1    | 1 |
| PTHR23187       | 1.88  | 1.88  | 0    | 0    | 1 |
| PTHR22826:SF19  | 1.19  | 1.19  | 0    | 0    | 1 |
| IPR003482       | 5.97  | 0     | 5.97 | 0    | 1 |
| IPR003484       | 1.12  | 0     | 1.12 | 0    | 1 |
| IPR000687       | 1.37  | 1.52  | 0    | 1    | 1 |
| IPR021151       | 1.55  | 1.58  | 0    | 1    | 1 |
| IPR012548       | 1.17  | 2.6   | 1.08 | 0    | 1 |
| IPR012549       | 1.59  | 0     | 1.59 | 0    | 1 |
| IPR012544       | 1.19  | 0     | 1.19 | 1    | 1 |
| IPR012547       | 3.5   | 2     | 3.06 | 19   | 1 |
| PF12243         | 1.08  | 1.08  | 0    | 0    | 1 |
| PTHR13256       | 1     | 1     | 0    | 0    | 1 |
| IPR004761       | 5.57  | 1     | 5.63 | 0    | 1 |
| IPR015018       | 1.52  | 0     | 1.53 | 1    | 1 |
| IPR006996       | 1.35  | 1.35  | 0    | 0    | 1 |
| IPR014854       | 1.45  | 1.45  | 0    | 0    | 1 |
| PTHR11709:SF2   | 1.2   | 1.5   | 1    | 1    | 1 |
| PTHR11124       | 1.15  | 1.22  | 1    | 0    | 1 |
| PF10219         | 1.22  | 1.22  | 0    | 0    | 1 |
| IPR012935       | 1.34  | 1.35  | 0    | 1    | 1 |
| IPR012933       | 1.84  | 0     | 1.8  | 2.5  | 1 |
| PF11970         | 1.59  | 1.59  | 0    | 0    | 1 |
| PF11975         | 1.5   | 0     | 1.5  | 0    | 1 |
| PTHR11938:SF7   | 1.05  | 0     | 1.05 | 0    | 1 |
| PTHR12081:SF1   | 1     | 1     | 0    | 0    | 1 |
| TIGR00622       | 1     | 1     | 0    | 0    | 1 |
| PTHR21790       | 1.1   | 1.1   | 0    | 0    | 1 |
| IPR022158       | 1.38  | 1.38  | 0    | 0    | 1 |
| IPR022151       | 2.61  | 2.61  | 0    | 0    | 1 |
| IPR022154       | 2.31  | 2.31  | 0    | 0    | 1 |
| IPR022157       | 1.6   | 1.6   | 0    | 0    | 1 |
| IPR007802       | 1.67  | 1.86  | 1    | 0    | 1 |
| IPR007805       | 1.06  | 0     | 1.03 | 1.25 | 1 |
| IPR007809       | 1.17  | 1     | 1.17 | 0    | 1 |
| PTHR10032:SF76  | 1.5   | 1.5   | 0    | 0    | 1 |
| IPR001925       | 4.26  | 4.26  | 0    | 0    | 1 |
| PTHR23224:SF47: | 1     | 1     | 0    | 0    | 1 |
| PTHR23224:SF47: | 1.25  | 1.25  | 0    | 0    | 1 |
| IPR007378       | 1.96  | 3.62  | 1.26 | 0    | 1 |
| IPR021346       | 1.04  | 1.04  | 0    | 0    | 1 |
| IPR001698       | 1.32  | 1.32  | 0    | 0    | 1 |
| IPR005333       | 24.86 | 24.86 | 0    | 0    | 1 |
| IPR005338       | 1.04  | 1.2   | 1.03 | 1    | 1 |
| IPR019295       | 1.23  | 0     | 1.23 | 0    | 1 |
| IPR009718       | 1.09  | 0     | 1.09 | 0    | 1 |
| IPR019438       | 1.12  | 1.12  | 1    | 0    | 1 |
| IPR003993       | 4.67  | 4.67  | 0    | 0    | 1 |
| PTHR18460       | 1.35  | 1.35  | 0    | 0    | 1 |
| IPR014957       | 1.85  | 0     | 1.85 | 0    | 1 |
| PF11018         | 5.06  | 5.06  | 0    | 0    | 1 |
| PTHR20976       | 1.4   | 1.4   | 0    | 0    | 1 |
| PTHR12294:SF3   | 1.5   | 1.5   | 0    | 0    | 1 |
| PTHR12294:SF1   | 1.68  | 1.68  | 0    | 0    | 1 |
| TIGR03068       | 1     | 0     | 1    | 0    | 1 |
| IPR018724       | 1.09  | 1.5   | 1.08 | 0    | 1 |
| IPR015265       | 1.01  | 0     | 1.01 | 0    | 1 |
| IPR015266       | 1     | 0     | 0    | 1    | 1 |
| IPR015261       | 1     | 0     | 1    | 0    | 1 |
| IPR021630       | 1     | 0     | 1    | 0    | 1 |



|                |       |       |      |      |   |
|----------------|-------|-------|------|------|---|
| IPR021631      | 1.62  | 0     | 1.62 | 0    | 1 |
| IPR015649      | 1.53  | 1.53  | 0    | 0    | 1 |
| PTHR21618      | 1.36  | 1.36  | 0    | 0    | 1 |
| IPR005866      | 1     | 0     | 0    | 1    | 1 |
| IPR010346      | 1.54  | 0     | 1.54 | 0    | 1 |
| IPR002846      | 1.64  | 0     | 1    | 1.94 | 1 |
| PF09037        | 1     | 1     | 1    | 0    | 1 |
| IPR006742      | 7     | 7     | 0    | 0    | 1 |
| IPR003717      | 1.01  | 0     | 1.01 | 0    | 1 |
| IPR003713      | 1.14  | 1     | 1.14 | 0    | 1 |
| IPR003712      | 1.06  | 1.1   | 1.05 | 0    | 1 |
| IPR001712      | 1.47  | 1     | 1.47 | 0    | 1 |
| IPR008535      | 1.01  | 0     | 1.01 | 0    | 1 |
| PTHR12942      | 1.33  | 1.33  | 0    | 0    | 1 |
| PTHR13097      | 1.29  | 1.29  | 0    | 0    | 1 |
| PTHR10548      | 1.38  | 1.38  | 0    | 0    | 1 |
| IPR020783      | 1     | 0     | 1    | 0    | 1 |
| PTHR23273      | 2     | 2     | 0    | 0    | 1 |
| TIGR01256      | 1.19  | 0     | 1.2  | 1    | 1 |
| IPR018713      | 2.28  | 2     | 2.32 | 0    | 1 |
| IPR010667      | 2     | 0     | 2    | 0    | 1 |
| IPR014567      | 1     | 0     | 1    | 0    | 1 |
| PTHR21361      | 1.25  | 1.25  | 0    | 0    | 1 |
| PTHR21943      | 1.36  | 1.36  | 0    | 0    | 1 |
| IPR000605      | 1.7   | 3     | 1.14 | 0    | 1 |
| PTHR23050:SF7  | 1     | 1     | 0    | 0    | 1 |
| IPR021050      | 1.03  | 0     | 1.03 | 0    | 1 |
| IPR019642      | 1     | 0     | 1    | 1    | 1 |
| IPR015093      | 1.1   | 0     | 1.12 | 1    | 1 |
| IPR015091      | 2.5   | 2.5   | 0    | 0    | 1 |
| IPR021847      | 1.92  | 0     | 1.92 | 0    | 1 |
| IPR015098      | 2.43  | 2.43  | 0    | 0    | 1 |
| PTHR22579      | 1.09  | 1.09  | 0    | 0    | 1 |
| IPR014769      | 1.03  | 0     | 1.03 | 0    | 1 |
| IPR014760      | 9.62  | 9.62  | 0    | 0    | 1 |
| IPR007468      | 1.25  | 0     | 1.25 | 0    | 1 |
| PF04426        | 2.67  | 2.67  | 0    | 0    | 1 |
| PTHR22979:SF2  | 3.25  | 3.25  | 0    | 0    | 1 |
| IPR008701      | 1.65  | 2.18  | 1.17 | 0    | 1 |
| IPR008703      | 1.19  | 0     | 1.19 | 0    | 1 |
| IPR005754      | 2.56  | 0     | 2.57 | 1.5  | 1 |
| PF05792        | 15.43 | 15.43 | 0    | 0    | 1 |
| PF09029        | 4.83  | 4.83  | 0    | 0    | 1 |
| IPR006759      | 2.4   | 2.4   | 0    | 0    | 1 |
| IPR006135      | 1.93  | 1     | 1.94 | 0    | 1 |
| IPR007666      | 1.44  | 1.43  | 1    | 1.5  | 1 |
| IPR007668      | 3.17  | 3.17  | 0    | 0    | 1 |
| IPR004646      | 1.32  | 1.38  | 1.33 | 1.07 | 1 |
| IPR018834      | 1.33  | 1.33  | 0    | 0    | 1 |
| IPR018835      | 1     | 1     | 0    | 0    | 1 |
| IPR018833      | 1.06  | 1     | 1.06 | 1    | 1 |
| IPR005512      | 13.14 | 13.14 | 0    | 0    | 1 |
| IPR005518      | 3.33  | 3.33  | 0    | 0    | 1 |
| IPR015352      | 1.6   | 1.6   | 0    | 0    | 1 |
| IPR006894      | 2.08  | 0     | 2.08 | 0    | 1 |
| IPR018307      | 1.29  | 1.29  | 0    | 0    | 1 |
| IPR018309      | 1.29  | 0     | 1.29 | 0    | 1 |
| PTHR13683:SF98 | 8.88  | 8.88  | 0    | 0    | 1 |
| IPR011501      | 1.1   | 1.1   | 0    | 0    | 1 |
| IPR013909      | 1.18  | 1.18  | 0    | 0    | 1 |
| IPR020276      | 1     | 0     | 1    | 0    | 1 |
| IPR020279      | 2.5   | 2.5   | 0    | 0    | 1 |
| TIGR01363      | 1     | 0     | 1    | 0    | 1 |
| PTHR22928      | 1.43  | 1.43  | 0    | 0    | 1 |
| PTHR21695      | 1.6   | 1.6   | 0    | 0    | 1 |
| PD043187       | 1.27  | 0     | 1.27 | 0    | 1 |
| IPR007033      | 2.42  | 2.42  | 0    | 0    | 1 |
| IPR003791      | 1.02  | 0     | 1.02 | 1    | 1 |
| PTHR12758:SF13 | 1.67  | 1.67  | 0    | 0    | 1 |

|                |      |      |      |      |   |
|----------------|------|------|------|------|---|
| IPR000260      | 2.25 | 6.82 | 1.03 | 1    | 1 |
| PF00281        | 1.08 | 1.74 | 1.02 | 1    | 1 |
| IPR004568      | 1.07 | 0    | 1.07 | 0    | 1 |
| PTHR16193      | 1.14 | 1.14 | 0    | 0    | 1 |
| IPR012431      | 1.88 | 0    | 1    | 2.38 | 1 |
| PF12481        | 5.75 | 5.75 | 0    | 0    | 1 |
| IPR001132      | 7.67 | 7.67 | 0    | 0    | 1 |
| IPR021570      | 1.32 | 0    | 1.32 | 0    | 1 |
| IPR022006      | 1    | 1    | 0    | 0    | 1 |
| IPR011202      | 1.06 | 0    | 1.06 | 0    | 1 |
| IPR010555      | 1.25 | 1.25 | 0    | 0    | 1 |
| IPR007955      | 1.2  | 1.2  | 0    | 0    | 1 |
| IPR007953      | 2    | 0    | 2    | 0    | 1 |
| IPR013880      | 1.25 | 1.25 | 0    | 0    | 1 |
| PF11119        | 1    | 0    | 1    | 0    | 1 |
| IPR012848      | 5.68 | 5.68 | 0    | 0    | 1 |
| PTHR13847:SF11 | 1    | 0    | 1    | 0    | 1 |
| PTHR10032:SF24 | 1    | 1    | 0    | 0    | 1 |
| IPR021770      | 1.03 | 0    | 1.03 | 0    | 1 |
| PTHR10887:SF20 | 1    | 1    | 0    | 0    | 1 |
| PTHR10887:SF23 | 1.09 | 1.25 | 1    | 1    | 1 |
| PF08911        | 1.79 | 1.79 | 0    | 0    | 1 |
| IPR008844      | 5.29 | 1    | 5.35 | 0    | 1 |
| IPR003453      | 1.96 | 1.38 | 1.96 | 0    | 1 |
| IPR013086      | 1.57 | 1.57 | 0    | 0    | 1 |
| IPR007201      | 2.97 | 2.97 | 0    | 0    | 1 |
| IPR007203      | 1.53 | 1.53 | 0    | 0    | 1 |
| IPR007207      | 1.24 | 1.24 | 0    | 0    | 1 |
| IPR016103      | 1.26 | 1    | 1.26 | 0    | 1 |
| IPR013622      | 1.02 | 0    | 1.02 | 0    | 1 |
| IPR013620      | 1.02 | 0    | 1.02 | 0    | 1 |
| IPR013626      | 3.6  | 7.89 | 1.76 | 0    | 1 |
| IPR008477      | 1.55 | 1.55 | 0    | 0    | 1 |
| IPR008474      | 1    | 1    | 0    | 0    | 1 |
| PTHR21736:SF12 | 1.73 | 1.73 | 0    | 0    | 1 |
| PTHR13198      | 1.2  | 1.2  | 0    | 0    | 1 |
| IPR009434      | 1.6  | 1.6  | 0    | 0    | 1 |
| IPR009430      | 2.66 | 0    | 2.68 | 2.5  | 1 |
| PF11776        | 1.4  | 0    | 1.4  | 0    | 1 |
| PTHR12456      | 1    | 1    | 0    | 0    | 1 |
| PTHR10803      | 1    | 0    | 1    | 0    | 1 |
| IPR020963      | 1.04 | 0    | 1.04 | 0    | 1 |
| PTHR23083:SF8  | 1.17 | 1.17 | 0    | 0    | 1 |
| PTHR22183      | 1.58 | 1.58 | 0    | 0    | 1 |
| IPR019128      | 1.1  | 1.1  | 0    | 0    | 1 |
| IPR021924      | 8.86 | 8.86 | 0    | 0    | 1 |
| IPR021925      | 1.6  | 1.6  | 0    | 0    | 1 |
| IPR021923      | 1.1  | 0    | 1.11 | 1    | 1 |
| IPR018657      | 1.51 | 0    | 1.52 | 1.33 | 1 |
| IPR018655      | 1.19 | 0    | 1.19 | 0    | 1 |
| IPR018659      | 1.02 | 1    | 1.02 | 0    | 1 |
| IPR018383      | 1.18 | 1    | 1.18 | 1.11 | 1 |
| IPR009902      | 6.14 | 6.14 | 0    | 0    | 1 |
| IPR014406      | 1    | 1    | 1    | 0    | 1 |
| IPR007506      | 1.11 | 1.2  | 1.21 | 1.03 | 1 |
| IPR007505      | 1.07 | 0    | 1.07 | 1    | 1 |
| IPR019464      | 1.78 | 1.78 | 0    | 0    | 1 |
| IPR019240      | 1.15 | 1    | 1.21 | 1    | 1 |
| IPR019460      | 1.18 | 1.18 | 0    | 0    | 1 |
| IPR005017      | 1.61 | 0    | 1.61 | 0    | 1 |
| IPR005013      | 1.35 | 1.35 | 0    | 0    | 1 |
| IPR007565      | 1.02 | 1    | 1.04 | 1    | 1 |
| PTHR14167:SF3  | 1.2  | 1.2  | 0    | 0    | 1 |
| PTHR10270:SF35 | 2.11 | 2.11 | 0    | 0    | 1 |
| IPR019634      | 1.19 | 2.25 | 1    | 0    | 1 |
| IPR015338      | 3.97 | 4.05 | 1    | 0    | 1 |
| IPR002097      | 2.23 | 2.27 | 1    | 0    | 1 |
| PTHR14187:SF5  | 2.92 | 2.92 | 0    | 0    | 1 |
| PF09787        | 2.21 | 2.21 | 0    | 0    | 1 |

|                |       |       |       |      |   |
|----------------|-------|-------|-------|------|---|
| IPR007749      | 8.57  | 8.57  | 0     | 0    | 1 |
| IPR007745      | 1.3   | 1.3   | 0     | 0    | 1 |
| PF08786        | 1.56  | 0     | 1.56  | 0    | 1 |
| IPR021069      | 1.66  | 0     | 1.66  | 0    | 1 |
| IPR021065      | 1     | 0     | 1     | 0    | 1 |
| PTHR11915:SF38 | 1     | 1     | 0     | 0    | 1 |
| IPR019084      | 1.85  | 1.85  | 0     | 0    | 1 |
| PF12404        | 1.03  | 0     | 1.03  | 0    | 1 |
| IPR015167      | 1     | 0     | 1     | 0    | 1 |
| IPR022082      | 6     | 6     | 0     | 0    | 1 |
| IPR022084      | 4.4   | 4.4   | 0     | 0    | 1 |
| IPR005656      | 1.65  | 1.94  | 1.65  | 1.12 | 1 |
| IPR005089      | 1.17  | 1.17  | 0     | 0    | 1 |
| IPR009505      | 1.17  | 1.17  | 0     | 0    | 1 |
| IPR013863      | 1.36  | 1.36  | 0     | 0    | 1 |
| PD487572       | 1     | 0     | 1     | 0    | 1 |
| PD052090       | 1.09  | 0     | 1.09  | 0    | 1 |
| PTHR15535      | 1     | 0     | 1     | 0    | 1 |
| IPR013134      | 1.25  | 1     | 1     | 2    | 1 |
| PF04734        | 1.5   | 1.73  | 1.31  | 1    | 1 |
| PF07427        | 1.2   | 0     | 0     | 1.2  | 1 |
| PF06774        | 1.62  | 0     | 1     | 1.67 | 1 |
| PTHR12085      | 1.32  | 1.32  | 0     | 0    | 1 |
| PTHR12087      | 1     | 1     | 0     | 0    | 1 |
| PTHR10795:SF32 | 1     | 0     | 1     | 0    | 1 |
| IPR004241      | 2.69  | 2.69  | 0     | 0    | 1 |
| PF12079        | 4.26  | 0     | 4.26  | 0    | 1 |
| PD027180       | 1.86  | 1.86  | 0     | 0    | 1 |
| PF11887        | 11.41 | 0     | 11.41 | 0    | 1 |
| PF11886        | 5.75  | 5.75  | 0     | 0    | 1 |
| PTHR13029      | 1.2   | 1.2   | 0     | 0    | 1 |
| IPR008013      | 3.8   | 3.8   | 0     | 0    | 1 |
| IPR008012      | 1.37  | 1.37  | 0     | 0    | 1 |
| PF05458        | 1.67  | 1.67  | 0     | 0    | 1 |
| TIGR03436      | 10.67 | 0     | 10.67 | 0    | 1 |
| PTHR22602      | 1     | 1     | 1     | 0    | 1 |
| PTHR22604      | 1.11  | 1     | 1.17  | 0    | 1 |
| PTHR19957:SF1  | 1     | 1     | 0     | 0    | 1 |
| IPR022244      | 1.14  | 1.62  | 1.03  | 0    | 1 |
| IPR022241      | 1.88  | 1.88  | 0     | 0    | 1 |
| IPR022248      | 1.44  | 2.33  | 1     | 0    | 1 |
| IPR022249      | 1     | 0     | 1     | 0    | 1 |
| IPR006625      | 28.35 | 28.35 | 0     | 0    | 1 |
| PTHR19410:SF95 | 1.19  | 1.6   | 1.1   | 0    | 1 |
| IPR001850      | 1.08  | 1.5   | 1     | 0    | 1 |
| IPR019541      | 3.33  | 3.33  | 0     | 0    | 1 |
| IPR019549      | 2.08  | 2.08  | 0     | 0    | 1 |
| IPR018491      | 4.86  | 4.86  | 0     | 0    | 1 |
| IPR002191      | 1.39  | 1     | 1.4   | 0    | 1 |
| IPR003820      | 1.08  | 1     | 1.08  | 1    | 1 |
| IPR003826      | 1.22  | 0     | 1.17  | 1.63 | 1 |
| IPR014795      | 1.53  | 0     | 1.53  | 0    | 1 |
| IPR014792      | 1.1   | 0     | 1.1   | 0    | 1 |
| IPR014864      | 1.13  | 0     | 1.04  | 1.41 | 1 |
| IPR014866      | 1.02  | 0     | 1.02  | 0    | 1 |
| IPR014863      | 1.38  | 1.38  | 0     | 0    | 1 |
| IPR014869      | 1     | 0     | 1     | 1    | 1 |
| PF11251        | 1.03  | 0     | 1.03  | 0    | 1 |
| IPR012963      | 1.3   | 0     | 1.3   | 1    | 1 |
| IPR012966      | 1.03  | 1.03  | 0     | 0    | 1 |
| TIGR01716      | 3.28  | 0     | 3.28  | 0    | 1 |
| PF11540        | 2.04  | 2.04  | 0     | 0    | 1 |
| IPR022166      | 2.11  | 2.11  | 0     | 0    | 1 |
| IPR011855      | 1.29  | 0     | 1.29  | 0    | 1 |
| PF12242        | 1     | 0     | 1     | 0    | 1 |
| IPR007851      | 1.15  | 1.15  | 0     | 0    | 1 |
| PTHR18958:SF29 | 1     | 1     | 1     | 0    | 1 |
| PTHR15963      | 1     | 0     | 0     | 1    | 1 |
| IPR003667      | 3.16  | 0     | 3.17  | 2    | 1 |

|                |      |      |      |      |   |
|----------------|------|------|------|------|---|
| PTHR10663:SF5  | 1    | 1    | 0    | 0    | 1 |
| PF06941        | 1.14 | 1.54 | 1.08 | 1    | 1 |
| IPR013545      | 1.5  | 0    | 1.5  | 0    | 1 |
| IPR005368      | 1.94 | 0    | 1.98 | 1.8  | 1 |
| IPR005361      | 1.16 | 0    | 1.17 | 1    | 1 |
| IPR019571      | 1.4  | 1.4  | 0    | 0    | 1 |
| IPR004942      | 2.85 | 4.03 | 2.57 | 1.62 | 1 |
| IPR018514      | 6.33 | 6.33 | 0    | 0    | 1 |
| IPR005090      | 2.75 | 1    | 2.79 | 0    | 1 |
| IPR020227      | 1    | 0    | 1    | 0    | 1 |
| IPR006849      | 1.32 | 1.32 | 0    | 0    | 1 |
| PTHR14790      | 1    | 1    | 0    | 0    | 1 |
| PTHR12796      | 1    | 1    | 0    | 0    | 1 |
| PTHR12272:SF7  | 1.38 | 1.38 | 0    | 0    | 1 |
| IPR001421      | 4.23 | 4.23 | 0    | 0    | 1 |
| IPR001427      | 9.15 | 9.15 | 0    | 0    | 1 |
| IPR019005      | 1    | 1    | 0    | 0    | 1 |
| IPR019002      | 1.26 | 1.26 | 0    | 0    | 1 |
| PTHR10183:SF38 | 1.67 | 1.67 | 0    | 0    | 1 |
| IPR018755      | 1.36 | 0    | 1.36 | 0    | 1 |
| IPR015259      | 1.68 | 0    | 1.68 | 0    | 1 |
| IPR010378      | 1.07 | 1.07 | 0    | 0    | 1 |
| IPR002876      | 1.15 | 1.23 | 1.15 | 0    | 1 |
| IPR001748      | 1.28 | 1.28 | 0    | 0    | 1 |
| IPR003222      | 2.97 | 2    | 3    | 0    | 1 |
| PTHR10519      | 1    | 0    | 1    | 0    | 1 |
| IPR009321      | 2.79 | 0    | 0    | 2.79 | 1 |
| PTHR23223      | 1.31 | 1.31 | 0    | 0    | 1 |
| PTHR23227      | 1    | 1    | 0    | 0    | 1 |
| TIGR03118      | 1.08 | 0    | 1.08 | 0    | 1 |
| PTHR21661:SF2  | 1    | 1    | 1    | 0    | 1 |
| PTHR19410:SF18 | 1.21 | 1.36 | 1    | 0    | 1 |
| PTHR23155:SF39 | 1.75 | 1.75 | 0    | 0    | 1 |
| IPR000638      | 3.47 | 0    | 3.41 | 4    | 1 |
| IPR000630      | 1.1  | 2    | 1.01 | 1    | 1 |
| TIGR02937      | 1.21 | 0    | 1.21 | 0    | 1 |
| TIGR02936      | 1.07 | 0    | 1.07 | 0    | 1 |
| IPR007177      | 1.06 | 1.09 | 0    | 1    | 1 |
| IPR007179      | 1    | 0    | 0    | 1    | 1 |
| PTHR16012      | 1.33 | 1.33 | 0    | 0    | 1 |
| PTHR13228      | 1    | 1    | 0    | 0    | 1 |
| IPR019637      | 1.02 | 0    | 1.02 | 0    | 1 |
| IPR015040      | 2.6  | 2.6  | 0    | 0    | 1 |
| IPR021814      | 1    | 0    | 1    | 0    | 1 |
| IPR018276      | 1.5  | 1.5  | 0    | 0    | 1 |
| IPR018272      | 7    | 0    | 7    | 0    | 1 |
| PTHR22915:SF2  | 1    | 1    | 1    | 0    | 1 |
| PTHR11481      | 2.4  | 2.4  | 0    | 0    | 1 |
| IPR007439      | 1.15 | 0    | 1.15 | 0    | 1 |
| IPR007433      | 1.38 | 0    | 1.38 | 0    | 1 |
| IPR007435      | 1.05 | 0    | 1.05 | 0    | 1 |
| PTHR13145      | 1.38 | 1.38 | 0    | 0    | 1 |
| IPR008758      | 5.3  | 5.3  | 0    | 0    | 1 |
| IPR005708      | 1.17 | 1.57 | 1.07 | 1    | 1 |
| PTHR10357:SF11 | 1.06 | 1    | 1.06 | 0    | 1 |
| IPR015858      | 1    | 0    | 1    | 0    | 1 |
| PTHR23053      | 2.86 | 2.86 | 0    | 0    | 1 |
| PTHR23057      | 1.11 | 1.11 | 0    | 0    | 1 |
| PF05249        | 1.36 | 1.67 | 1.32 | 0    | 1 |
| PF12422        | 1.75 | 1.75 | 0    | 0    | 1 |
| PTHR22729      | 1.33 | 1.33 | 0    | 0    | 1 |
| PTHR13824:SF36 | 2.67 | 2.88 | 1    | 0    | 1 |
| IPR003742      | 1.03 | 1.22 | 1.03 | 1    | 1 |
| PF12390        | 1.01 | 0    | 1.01 | 0    | 1 |
| IPR010894      | 1.46 | 0    | 1.46 | 0    | 1 |
| IPR000397      | 1.03 | 1.5  | 1.02 | 0    | 1 |
| IPR018843      | 1    | 1    | 0    | 0    | 1 |
| PF12573        | 1.02 | 0    | 1.02 | 0    | 1 |
| PF12578        | 1.32 | 1.32 | 0    | 0    | 1 |

|                |      |      |      |      |   |
|----------------|------|------|------|------|---|
| IPR008195      | 1.69 | 1.96 | 0    | 1    | 1 |
| IPR002631      | 1.06 | 0    | 1.06 | 0    | 1 |
| IPR018598      | 1    | 0    | 1    | 0    | 1 |
| IPR010468      | 1.22 | 1.22 | 0    | 0    | 1 |
| IPR002099      | 1.22 | 1.22 | 0    | 0    | 1 |
| IPR010461      | 1.78 | 0    | 1.78 | 0    | 1 |
| IPR010284      | 1    | 1    | 1    | 0    | 1 |
| IPR010287      | 2.34 | 0    | 2.35 | 1    | 1 |
| IPR014903      | 1.29 | 4    | 1.21 | 0    | 1 |
| PTHR19269:SF11 | 1.33 | 1.33 | 0    | 0    | 1 |
| PTHR12306:SF1  | 1.2  | 1.2  | 0    | 0    | 1 |
| IPR020228      | 1    | 0    | 1    | 0    | 1 |
| PTHR12197:SF3  | 3.31 | 3.31 | 0    | 0    | 1 |
| IPR005830      | 2.08 | 4    | 1.12 | 0    | 1 |
| IPR005838      | 1.42 | 0    | 1.42 | 0    | 1 |
| IPR006715      | 5.75 | 5.75 | 0    | 0    | 1 |
| IPR006711      | 4.62 | 4.62 | 0    | 0    | 1 |
| IPR000928      | 2.4  | 2.4  | 0    | 0    | 1 |
| IPR003740      | 4.85 | 0    | 4.93 | 1.38 | 1 |
| IPR016073      | 1.27 | 1.27 | 0    | 0    | 1 |
| IPR008542      | 7.17 | 0    | 7.17 | 0    | 1 |
| IPR008540      | 9    | 9    | 0    | 0    | 1 |
| IPR021527      | 1.47 | 0    | 1.31 | 6    | 1 |
| IPR004823      | 1.34 | 1.34 | 0    | 0    | 1 |
| IPR009637      | 2.69 | 2.69 | 0    | 0    | 1 |
| IPR009639      | 1    | 0    | 0    | 1    | 1 |
| PTHR13646      | 1    | 1    | 0    | 0    | 1 |
| IPR010586      | 1.12 | 0    | 1.12 | 0    | 0 |
| IPR010634      | 1.17 | 1.57 | 1.14 | 0    | 0 |
| IPR010633      | 1.88 | 0    | 1.88 | 0    | 0 |
| PTHR14699      | 1.71 | 1.71 | 0    | 0    | 0 |
| IPR007902      | 1.12 | 1.12 | 0    | 0    | 0 |
| IPR017066      | 7.83 | 7.83 | 0    | 0    | 0 |
| IPR017062      | 1    | 0    | 1    | 0    | 0 |
| IPR016337      | 1.67 | 1.67 | 0    | 0    | 0 |
| IPR016332      | 1.67 | 1.67 | 0    | 0    | 0 |
| IPR021493      | 1.53 | 0    | 1.54 | 1.33 | 0 |
| PTHR12522      | 1.69 | 1.69 | 0    | 0    | 0 |
| PTHR11143:SF2  | 1.43 | 1.43 | 0    | 0    | 0 |
| IPR020581      | 1.22 | 1.4  | 1    | 0    | 0 |
| PTHR15011:SF3  | 1.33 | 1.33 | 0    | 0    | 0 |
| IPR020055      | 1.05 | 1.6  | 1.04 | 0    | 0 |
| PD029262       | 1    | 0    | 0    | 1    | 0 |
| IPR008837      | 1.93 | 1.93 | 0    | 0    | 0 |
| IPR008836      | 4.25 | 4.25 | 0    | 0    | 0 |
| IPR008835      | 2.43 | 2.43 | 0    | 0    | 0 |
| TIGR02449      | 1    | 1    | 1    | 0    | 0 |
| IPR021898      | 3.12 | 0    | 3.12 | 0    | 0 |
| IPR021890      | 1.02 | 0    | 1.03 | 1    | 0 |
| IPR018678      | 1.14 | 0    | 1.14 | 0    | 0 |
| PTHR21078      | 5.45 | 5.45 | 0    | 0    | 0 |
| TIGR00964      | 1    | 0    | 1    | 0    | 0 |
| TIGR00965      | 1    | 0    | 1    | 0    | 0 |
| PTHR21076      | 1.75 | 1.75 | 0    | 0    | 0 |
| PTHR21074      | 1.25 | 1.25 | 0    | 0    | 0 |
| IPR009874      | 1.14 | 0    | 1.14 | 1    | 0 |
| IPR009872      | 1.59 | 0    | 1.61 | 1    | 0 |
| IPR006699      | 1.21 | 0    | 1.21 | 0    | 0 |
| PTHR13986:SF4  | 1.33 | 1.33 | 0    | 0    | 0 |
| PTHR13986:SF3  | 3.5  | 3.5  | 0    | 0    | 0 |
| PF09659        | 1.11 | 0    | 1.11 | 0    | 0 |
| PF09650        | 1.03 | 0    | 1.03 | 0    | 0 |
| IPR017264      | 1    | 1    | 0    | 0    | 0 |
| IPR017263      | 1    | 0    | 1    | 0    | 0 |
| IPR017260      | 1.03 | 0    | 1.03 | 0    | 0 |
| PTHR18911      | 1.29 | 1.29 | 0    | 0    | 0 |
| PF07128        | 1.86 | 0    | 1.86 | 0    | 0 |
| PTHR12324      | 2.5  | 2.5  | 0    | 0    | 0 |
| IPR015656      | 1.33 | 1.33 | 0    | 0    | 0 |

|                |      |      |      |      |   |
|----------------|------|------|------|------|---|
| IPR019372      | 3.08 | 3.08 | 0    | 0    | 0 |
| IPR019379      | 1.03 | 1.03 | 0    | 0    | 0 |
| PTHR11566:SF19 | 2.33 | 2.33 | 0    | 0    | 0 |
| IPR002780      | 1.09 | 0    | 1.09 | 1.03 | 0 |
| IPR009405      | 1.33 | 0    | 1.33 | 0    | 0 |
| IPR005780      | 1    | 0    | 0    | 1    | 0 |
| IPR009406      | 1    | 0    | 1    | 0    | 0 |
| IPR009400      | 1.14 | 1.14 | 0    | 0    | 0 |
| IPR009403      | 1.02 | 0    | 1.02 | 0    | 0 |
| IPR009409      | 1.3  | 0    | 1.09 | 2.5  | 0 |
| PTHR10662:SF2  | 1.5  | 1.5  | 0    | 0    | 0 |
| PF12116        | 1.15 | 0    | 1.15 | 0    | 0 |
| TIGR01560      | 1.2  | 0    | 1.2  | 0    | 0 |
| IPR010771      | 1.03 | 1    | 1.03 | 0    | 0 |
| IPR010773      | 1.14 | 0    | 1.14 | 0    | 0 |
| IPR010774      | 1.28 | 0    | 1.28 | 0    | 0 |
| IPR010777      | 1.6  | 0    | 1.6  | 0    | 0 |
| IPR017746      | 1.11 | 0    | 1.11 | 0    | 0 |
| PD070929       | 1.02 | 0    | 1.02 | 0    | 0 |
| PTHR21422:SF5  | 1.86 | 1.86 | 0    | 0    | 0 |
| PTHR21422:SF7  | 1.5  | 1.5  | 0    | 0    | 0 |
| PTHR23162:SF2  | 3    | 3    | 0    | 0    | 0 |
| PTHR23162:SF1  | 1.25 | 1.25 | 0    | 0    | 0 |
| PTHR19308      | 4.44 | 4.44 | 0    | 0    | 0 |
| PTHR21276      | 1    | 1    | 0    | 0    | 0 |
| PTHR21271      | 1.6  | 1.6  | 0    | 0    | 0 |
| PD321411       | 1    | 0    | 0    | 1    | 0 |
| IPR016215      | 2.38 | 0    | 2.38 | 0    | 0 |
| PF09417        | 1    | 1    | 0    | 0    | 0 |
| IPR007633      | 1.05 | 0    | 1.05 | 0    | 0 |
| IPR021953      | 1.22 | 0    | 1.22 | 0    | 0 |
| IPR021955      | 1.02 | 0    | 1.02 | 0    | 0 |
| IPR006789      | 1.47 | 1.47 | 0    | 0    | 0 |
| IPR019178      | 1.67 | 1.67 | 0    | 0    | 0 |
| IPR019179      | 1.39 | 1.39 | 0    | 0    | 0 |
| PTHR22207      | 3.42 | 3.42 | 0    | 0    | 0 |
| IPR019170      | 1.59 | 1.59 | 0    | 0    | 0 |
| IPR019171      | 1.04 | 1.04 | 0    | 0    | 0 |
| IPR019173      | 1.19 | 1.19 | 0    | 0    | 0 |
| IPR019174      | 1.21 | 1.21 | 0    | 0    | 0 |
| IPR016940      | 1    | 0    | 1    | 0    | 0 |
| IPR008116      | 1    | 1    | 0    | 0    | 0 |
| PTHR10827:SF1  | 1    | 1    | 0    | 0    | 0 |
| IPR021919      | 1.09 | 1.44 | 1    | 0    | 0 |
| IPR009249      | 2.04 | 1.62 | 2.13 | 0    | 0 |
| IPR009248      | 1.04 | 0    | 1.04 | 0    | 0 |
| PTHR14432:SF3  | 1.25 | 1.25 | 0    | 0    | 0 |
| IPR009932      | 1.67 | 1.67 | 0    | 0    | 0 |
| IPR009935      | 1.03 | 0    | 1.03 | 0    | 0 |
| IPR014450      | 1    | 0    | 0    | 1    | 0 |
| IPR003059      | 1    | 0    | 1    | 0    | 0 |
| IPR007576      | 3.12 | 3.12 | 0    | 0    | 0 |
| IPR017185      | 2.2  | 0    | 0    | 2.2  | 0 |
| IPR007570      | 1.02 | 1.17 | 1    | 0    | 0 |
| IPR014988      | 1.23 | 1    | 1.26 | 1    | 0 |
| IPR014989      | 1.16 | 0    | 1.16 | 0    | 0 |
| IPR014986      | 1.63 | 0    | 1.63 | 0    | 0 |
| IPR014987      | 1.01 | 0    | 1.01 | 0    | 0 |
| IPR014984      | 1    | 1    | 1    | 0    | 0 |
| IPR014985      | 1.12 | 0    | 1.13 | 1    | 0 |
| IPR014980      | 1.04 | 1.17 | 1    | 0    | 0 |
| MF_00251       | 1    | 0    | 1    | 0    | 0 |
| IPR002908      | 1.06 | 1.21 | 1.01 | 0    | 0 |
| IPR016583      | 1.5  | 0    | 1.5  | 0    | 0 |
| IPR000509      | 1.41 | 1.41 | 0    | 0    | 0 |
| PF10991        | 1.08 | 0    | 1.08 | 0    | 0 |
| PTHR13502:SF3  | 1    | 1    | 0    | 0    | 0 |
| TIGR01691      | 1    | 1    | 1    | 0    | 0 |
| IPR008655      | 2.5  | 0    | 2.5  | 0    | 0 |

|                |       |       |      |      |   |
|----------------|-------|-------|------|------|---|
| IPR008653      | 3     | 3     | 0    | 0    | 0 |
| IPR005067      | 2.98  | 8.5   | 1.83 | 0    | 0 |
| PTHR11695:SF5  | 1.33  | 1.44  | 1    | 0    | 0 |
| IPR016962      | 1     | 0     | 1    | 0    | 0 |
| IPR016960      | 1     | 0     | 1    | 0    | 0 |
| PTHR23313      | 1.31  | 1.31  | 0    | 0    | 0 |
| IPR019294      | 1.11  | 0     | 1.11 | 0    | 0 |
| PD037701       | 1     | 0     | 1    | 0    | 0 |
| PTHR14455      | 1.5   | 1.5   | 0    | 0    | 0 |
| PTHR14454      | 2.25  | 2.25  | 0    | 0    | 0 |
| PTHR22446      | 2     | 2     | 0    | 0    | 0 |
| PTHR22442      | 1.67  | 1.67  | 0    | 0    | 0 |
| PTHR22934:SF14 | 1.08  | 1.08  | 0    | 0    | 0 |
| PTHR22996      | 1.33  | 1.33  | 0    | 0    | 0 |
| IPR019884      | 1.06  | 0     | 1.06 | 0    | 0 |
| IPR007777      | 3.25  | 0     | 3.25 | 0    | 0 |
| IPR003212      | 1.88  | 0     | 0    | 1.88 | 0 |
| IPR003213      | 2.66  | 2.66  | 0    | 0    | 0 |
| IPR003211      | 1.04  | 0     | 1.04 | 0    | 0 |
| PD073252       | 1.07  | 0     | 1.07 | 0    | 0 |
| PTHR10285:SF1  | 1.11  | 1.19  | 1    | 0    | 0 |
| IPR012485      | 1.18  | 1.18  | 0    | 0    | 0 |
| IPR012489      | 1.5   | 0     | 1.5  | 0    | 0 |
| PTHR13535      | 1.14  | 1.14  | 0    | 0    | 0 |
| PTHR13530      | 1.25  | 1.25  | 0    | 0    | 0 |
| IPR019703      | 1.02  | 0     | 1.02 | 0    | 0 |
| IPR019701      | 1.25  | 0     | 1.25 | 0    | 0 |
| IPR019706      | 1.02  | 0     | 1.02 | 0    | 0 |
| IPR019705      | 1.02  | 0     | 1.02 | 0    | 0 |
| IPR008323      | 1.06  | 2     | 1.06 | 1    | 0 |
| IPR008321      | 1.03  | 0     | 1.03 | 0    | 0 |
| IPR008320      | 1.02  | 0     | 1.02 | 0    | 0 |
| IPR015131      | 1.2   | 1.2   | 0    | 0    | 0 |
| IPR015138      | 1     | 0     | 1    | 0    | 0 |
| IPR015139      | 3.5   | 0     | 3.5  | 0    | 0 |
| IPR022072      | 1     | 0     | 1    | 0    | 0 |
| IPR010500      | 1.56  | 1.56  | 0    | 0    | 0 |
| PTHR10374      | 1.4   | 1.4   | 0    | 0    | 0 |
| PTHR11076:SF1  | 1.31  | 1.31  | 0    | 0    | 0 |
| IPR004383      | 1     | 1     | 1    | 0    | 0 |
| PTHR12979:SF4  | 1.71  | 1.71  | 0    | 0    | 0 |
| PF07412        | 1.48  | 1.48  | 0    | 0    | 0 |
| IPR016621      | 1     | 0     | 1    | 1    | 0 |
| IPR016629      | 2.25  | 2.25  | 0    | 0    | 0 |
| IPR016628      | 1.18  | 0     | 1.18 | 0    | 0 |
| PF10817        | 1     | 0     | 1    | 0    | 0 |
| PF10815        | 1     | 0     | 1    | 0    | 0 |
| PF10814        | 1     | 0     | 1    | 0    | 0 |
| PF10812        | 1     | 0     | 1    | 0    | 0 |
| PF10811        | 1     | 0     | 1    | 0    | 0 |
| PF10810        | 1     | 0     | 1    | 0    | 0 |
| IPR004279      | 3.7   | 3.7   | 0    | 0    | 0 |
| IPR018919      | 1.11  | 0     | 1.11 | 0    | 0 |
| IPR018918      | 1.1   | 0     | 1.1  | 0    | 0 |
| IPR018914      | 1.17  | 0     | 1.17 | 0    | 0 |
| IPR018917      | 1.56  | 0     | 1.56 | 0    | 0 |
| PTHR18895:SF8  | 1.06  | 1.08  | 1    | 0    | 0 |
| IPR020508      | 1     | 0     | 1    | 0    | 0 |
| IPR020505      | 1     | 0     | 0    | 1    | 0 |
| IPR020506      | 1     | 0     | 1    | 0    | 0 |
| IPR020500      | 1.17  | 0     | 1.17 | 0    | 0 |
| IPR020502      | 1     | 0     | 1    | 0    | 0 |
| PTHR23290      | 1     | 1     | 0    | 1    | 0 |
| PTHR23120      | 2     | 2     | 0    | 0    | 0 |
| PTHR21565      | 1.1   | 1.1   | 0    | 0    | 0 |
| PTHR14429:SF4  | 1.67  | 1.67  | 0    | 0    | 0 |
| IPR022278      | 1.33  | 0     | 1.33 | 0    | 0 |
| PTHR21380      | 1.07  | 1.07  | 0    | 0    | 0 |
| IPR006611      | 10.43 | 10.43 | 0    | 0    | 0 |

|                |      |      |      |      |   |
|----------------|------|------|------|------|---|
| IPR006610      | 4.4  | 4.4  | 0    | 0    | 0 |
| MF_01240       | 1    | 0    | 1    | 0    | 0 |
| IPR003398      | 1.2  | 1.44 | 1.14 | 0    | 0 |
| PTHR15817      | 1    | 1    | 0    | 0    | 0 |
| IPR007254      | 1.14 | 0    | 0    | 1.14 | 0 |
| IPR013389      | 1.06 | 0    | 1.04 | 1.12 | 0 |
| IPR013388      | 1.03 | 0    | 1.03 | 0    | 0 |
| IPR008426      | 1.07 | 1.07 | 0    | 0    | 0 |
| IPR008420      | 2.5  | 0    | 2.5  | 0    | 0 |
| IPR000151      | 1.5  | 1.5  | 0    | 0    | 0 |
| IPR012381      | 1    | 0    | 1    | 0    | 0 |
| PD857460       | 1    | 0    | 1    | 0    | 0 |
| IPR016867      | 1.23 | 0    | 1.23 | 0    | 0 |
| IPR009776      | 1.37 | 0    | 1.37 | 0    | 0 |
| IPR009779      | 1.31 | 1.31 | 0    | 0    | 0 |
| IPR009778      | 1.02 | 0    | 1.02 | 0    | 0 |
| IPR009489      | 4.25 | 4.25 | 0    | 0    | 0 |
| IPR009488      | 2.13 | 0    | 2.13 | 0    | 0 |
| IPR009483      | 1.04 | 0    | 1.04 | 0    | 0 |
| IPR009482      | 2.25 | 0    | 0    | 2.25 | 0 |
| IPR019517      | 1    | 1    | 0    | 0    | 0 |
| PTHR10957:SF2  | 1.27 | 1.27 | 0    | 0    | 0 |
| IPR016472      | 1    | 0    | 0    | 1    | 0 |
| PF11266        | 1.06 | 0    | 1.06 | 0    | 0 |
| PTHR13219      | 1.13 | 1.13 | 0    | 0    | 0 |
| PTHR21812      | 1.29 | 1.29 | 0    | 0    | 0 |
| PTHR21818      | 1.24 | 1.24 | 0    | 0    | 0 |
| PTHR22774:SF6  | 1.11 | 1.11 | 0    | 0    | 0 |
| PTHR22774:SF4  | 1.75 | 1.75 | 0    | 0    | 0 |
| PTHR12619:SF1  | 1    | 1    | 0    | 0    | 0 |
| IPR020314      | 1    | 0    | 1    | 0    | 0 |
| IPR020316      | 1    | 0    | 1    | 0    | 0 |
| IPR020311      | 1    | 0    | 1    | 0    | 0 |
| IPR015053      | 1.04 | 0    | 1.04 | 0    | 0 |
| IPR015055      | 1    | 0    | 1    | 1    | 0 |
| IPR021808      | 1.52 | 0    | 1.52 | 0    | 0 |
| IPR021447      | 1.02 | 0    | 1.02 | 0    | 0 |
| IPR021445      | 1.35 | 1    | 1.37 | 0    | 0 |
| IPR021444      | 1    | 0    | 1    | 0    | 0 |
| IPR021443      | 1.06 | 0    | 1.06 | 0    | 0 |
| IPR021441      | 1.04 | 0    | 1.04 | 0    | 0 |
| IPR021448      | 1    | 0    | 1    | 0    | 0 |
| PTHR22175      | 1.25 | 1.25 | 0    | 0    | 0 |
| PTHR22171      | 1    | 1    | 0    | 0    | 0 |
| PTHR21486      | 1    | 1    | 0    | 0    | 0 |
| PTHR22285      | 1.09 | 1.09 | 0    | 0    | 0 |
| PTHR22281      | 1.25 | 1.25 | 0    | 0    | 0 |
| IPR018621      | 1    | 1    | 0    | 0    | 0 |
| IPR018627      | 1.27 | 1.28 | 1    | 0    | 0 |
| IPR018626      | 1.03 | 1.03 | 0    | 0    | 0 |
| IPR018625      | 1.07 | 1.07 | 0    | 0    | 0 |
| IPR018624      | 1    | 1    | 0    | 0    | 0 |
| IPR018629      | 4.17 | 4.28 | 0    | 1    | 0 |
| TIGR02569      | 1    | 0    | 1    | 0    | 0 |
| TIGR02562      | 1.03 | 0    | 1.03 | 0    | 0 |
| PTHR21731      | 2.33 | 2.33 | 0    | 0    | 0 |
| PTHR21732      | 1.33 | 1.33 | 0    | 0    | 0 |
| PTHR11527      | 1.08 | 1.5  | 1    | 1    | 0 |
| IPR016270      | 1    | 1    | 1    | 0    | 0 |
| IPR010825      | 6.43 | 6.43 | 0    | 0    | 0 |
| IPR019239      | 1.69 | 0    | 1.69 | 2    | 0 |
| IPR019232      | 1.03 | 0    | 1.03 | 1    | 0 |
| IPR019231      | 1.04 | 0    | 1.04 | 0    | 0 |
| IPR005351      | 1.21 | 1.21 | 0    | 0    | 0 |
| PTHR23125:SF48 | 1    | 1    | 0    | 0    | 0 |
| IPR005354      | 1    | 0    | 0    | 1    | 0 |
| PF10687        | 1.34 | 1    | 1.38 | 1.2  | 0 |
| PTHR16502      | 2    | 2    | 0    | 0    | 0 |
| IPR018547      | 1    | 0    | 1    | 0    | 0 |



|                 |       |       |      |      |   |
|-----------------|-------|-------|------|------|---|
| IPR018544       | 1.12  | 1.12  | 0    | 0    | 0 |
| IPR009765       | 19.56 | 19.56 | 0    | 0    | 0 |
| PTHR23422       | 1     | 0     | 1    | 0    | 0 |
| TIGR01448       | 1     | 0     | 1    | 0    | 0 |
| IPR011690       | 2.05  | 0     | 2.05 | 0    | 0 |
| IPR006875       | 2.79  | 2.79  | 0    | 0    | 0 |
| IPR014318       | 1.02  | 0     | 1.02 | 0    | 0 |
| IPR003464       | 1.21  | 0     | 1.23 | 1    | 0 |
| PTHR23283:SF13  | 1.11  | 0     | 1.11 | 0    | 0 |
| PD107880        | 1     | 1     | 0    | 0    | 0 |
| PTHR11201:SF236 | 3.62  | 3.62  | 0    | 0    | 0 |
| PTHR10825:SF1   | 2     | 2     | 0    | 0    | 0 |
| PTHR21134       | 1.55  | 1.55  | 0    | 0    | 0 |
| PTHR21132       | 1.25  | 1.25  | 0    | 0    | 0 |
| PTHR21130       | 1.09  | 1.09  | 0    | 0    | 0 |
| PTHR13289       | 1.43  | 1.43  | 0    | 0    | 0 |
| IPR019697       | 1.15  | 0     | 1.15 | 0    | 0 |
| PTHR15829:SF1   | 2     | 2     | 0    | 0    | 0 |
| PTHR15829:SF2   | 1.83  | 1.83  | 0    | 0    | 0 |
| MF_00669        | 1     | 0     | 1    | 0    | 0 |
| IPR020874       | 1.05  | 1.33  | 1    | 0    | 0 |
| PTHR21358:SF1   | 2.33  | 2.33  | 0    | 0    | 0 |
| IPR020299       | 1.33  | 0     | 1.33 | 0    | 0 |
| IPR020291       | 1.2   | 0     | 1.2  | 0    | 0 |
| IPR020292       | 1     | 0     | 1    | 1    | 0 |
| IPR020295       | 1     | 0     | 1    | 0    | 0 |
| IPR020296       | 1     | 0     | 1    | 0    | 0 |
| PTHR13123:SF2   | 1     | 1     | 0    | 0    | 0 |
| PTHR13123:SF3   | 2.5   | 2.5   | 0    | 0    | 0 |
| PTHR11351:SF14  | 1     | 1     | 0    | 0    | 0 |
| IPR007428       | 1.23  | 0     | 1.23 | 0    | 0 |
| IPR001470       | 1.77  | 0     | 1.77 | 0    | 0 |
| IPR019034       | 1.02  | 1.02  | 0    | 0    | 0 |
| IPR019036       | 1.5   | 0     | 1.5  | 0    | 0 |
| IPR015207       | 1.11  | 0     | 1.13 | 1    | 0 |
| PTHR16076:SF4   | 2     | 2     | 0    | 0    | 0 |
| PTHR21672       | 1.08  | 1.08  | 0    | 0    | 0 |
| PTHR21674       | 1.38  | 1.38  | 0    | 0    | 0 |
| PTHR21676       | 1.31  | 1.31  | 0    | 0    | 0 |
| IPR018784       | 1.08  | 1.08  | 0    | 0    | 0 |
| IPR008908       | 1     | 1     | 0    | 0    | 0 |
| IPR008901       | 1.65  | 2.02  | 1.03 | 0    | 0 |
| IPR009052       | 1.22  | 0     | 1.22 | 0    | 0 |
| IPR005886       | 1     | 1     | 1    | 0    | 0 |
| IPR011455       | 6.67  | 0     | 6.67 | 0    | 0 |
| PTHR11647:SF2   | 1     | 1     | 1    | 0    | 0 |
| IPR010321       | 1.66  | 0     | 1.66 | 0    | 0 |
| IPR010326       | 1.61  | 1.61  | 0    | 0    | 0 |
| IPR002822       | 1.09  | 0     | 1.09 | 1.09 | 0 |
| IPR002823       | 1.97  | 2     | 2.08 | 1.12 | 0 |
| IPR000463       | 1.4   | 1.4   | 0    | 0    | 0 |
| IPR012892       | 1.56  | 0     | 1.56 | 0    | 0 |
| MF_01622        | 1     | 0     | 1    | 0    | 0 |
| PTHR17554       | 1.62  | 1.71  | 1    | 0    | 0 |
| PTHR13072       | 1.09  | 1.09  | 1    | 0    | 0 |
| IPR018994       | 1.04  | 0     | 1.04 | 0    | 0 |
| PTHR23211       | 2     | 2     | 0    | 0    | 0 |
| PTHR23210       | 1.4   | 1.4   | 0    | 0    | 0 |
| PTHR23215       | 1.51  | 1.51  | 0    | 0    | 0 |
| IPR009311       | 4.31  | 4.31  | 0    | 0    | 0 |
| IPR009310       | 1     | 0     | 1    | 0    | 0 |
| IPR009312       | 1.83  | 0     | 1.83 | 0    | 0 |
| IPR011152       | 1     | 0     | 1    | 1    | 0 |
| IPR014508       | 1     | 0     | 1    | 0    | 0 |
| IPR014500       | 1     | 0     | 1    | 0    | 0 |
| TIGR02738       | 1.19  | 0     | 1.19 | 0    | 0 |
| PTHR15040       | 2.4   | 2.4   | 0    | 0    | 0 |
| PTHR22659       | 1.17  | 1.17  | 0    | 0    | 0 |
| PTHR22654       | 1.26  | 1.26  | 0    | 0    | 0 |

|               |      |      |      |      |   |
|---------------|------|------|------|------|---|
| PTHR21306     | 1.08 | 1.08 | 0    | 0    | 0 |
| TIGR03123     | 1    | 0    | 1    | 1    | 0 |
| TIGR02291     | 1    | 0    | 1    | 0    | 0 |
| PTHR10566:SF7 | 1.38 | 1.45 | 1    | 0    | 0 |
| PTHR12277:SF8 | 2.21 | 2.35 | 1    | 0    | 0 |
| PTHR13601:SF2 | 3    | 3    | 0    | 0    | 0 |
| PTHR13601:SF1 | 1.08 | 1.08 | 0    | 0    | 0 |
| PF06520       | 1.5  | 0    | 1.51 | 1    | 0 |
| IPR021284     | 1.61 | 0    | 1.61 | 0    | 0 |
| IPR021281     | 1.33 | 1.33 | 0    | 0    | 0 |
| IPR021283     | 1.27 | 0    | 1.27 | 0    | 0 |
| PTHR13278     | 1.21 | 1.21 | 0    | 0    | 0 |
| PTHR12380:SF7 | 1.4  | 1.4  | 0    | 0    | 0 |
| IPR008200     | 1.2  | 1.2  | 0    | 0    | 0 |
| IPR008203     | 2    | 0    | 1.2  | 2.8  | 0 |
| IPR008205     | 1.05 | 0    | 1.03 | 1.07 | 0 |
| IPR019593     | 2.17 | 0    | 2.17 | 0    | 0 |
| IPR019596     | 1.03 | 1    | 1.03 | 0    | 0 |
| IPR019597     | 1    | 0    | 0    | 1    | 0 |
| IPR019598     | 1.03 | 0    | 1.03 | 0    | 0 |
| IPR021822     | 2.1  | 2.15 | 1    | 0    | 0 |
| IPR015079     | 1.05 | 0    | 1.05 | 0    | 0 |
| IPR015078     | 1.08 | 0    | 1.08 | 0    | 0 |
| IPR003874     | 1.31 | 1.31 | 0    | 0    | 0 |
| IPR019064     | 1    | 0    | 1    | 0    | 0 |
| IPR007007     | 4.38 | 4.38 | 0    | 0    | 0 |
| IPR007005     | 1.18 | 1.18 | 0    | 0    | 0 |
| PTHR13463:SF2 | 1.33 | 1.33 | 0    | 0    | 0 |
| PTHR12484     | 1.27 | 1.27 | 0    | 0    | 0 |
| IPR012917     | 1    | 1    | 0    | 0    | 0 |
| IPR004422     | 1    | 0    | 1    | 1    | 0 |
| IPR017744     | 1.01 | 0    | 1.01 | 0    | 0 |
| PF10773       | 1    | 0    | 1    | 0    | 0 |
| IPR020397     | 1    | 0    | 1    | 0    | 0 |
| IPR020393     | 1    | 0    | 1    | 0    | 0 |
| IPR020399     | 1    | 1    | 0    | 0    | 0 |
| PTHR23006     | 1    | 1    | 0    | 0    | 0 |
| TIGR01023     | 1    | 1    | 1    | 0    | 0 |
| PTHR21401     | 1    | 1    | 0    | 0    | 0 |
| IPR000996     | 1.68 | 1.68 | 0    | 0    | 0 |
| PTHR21277:SF1 | 1.14 | 1.14 | 0    | 0    | 0 |
| PTHR21277:SF3 | 1.08 | 1.08 | 0    | 0    | 0 |
| IPR020987     | 1.71 | 1.71 | 0    | 0    | 0 |
| IPR007687     | 1.06 | 0    | 0    | 1.06 | 0 |
| IPR007686     | 1.07 | 0    | 1.07 | 1    | 0 |
| IPR007680     | 2.85 | 0    | 2.85 | 0    | 0 |
| IPR007682     | 1.14 | 0    | 1.14 | 0    | 0 |
| IPR006480     | 1.44 | 0    | 1.44 | 0    | 0 |
| IPR006482     | 1.1  | 0    | 1.1  | 1.1  | 0 |
| IPR006485     | 1.39 | 0    | 1.39 | 0    | 0 |
| IPR007352     | 1.15 | 0    | 1.09 | 2    | 0 |
| IPR007355     | 1    | 0    | 0    | 1    | 0 |
| IPR013514     | 1.33 | 0    | 1.33 | 0    | 0 |
| IPR021326     | 1.57 | 0    | 1.57 | 0    | 0 |
| IPR021324     | 1.02 | 0    | 1.02 | 0    | 0 |
| IPR021325     | 1.45 | 3.22 | 1    | 0    | 0 |
| IPR021323     | 1.32 | 0    | 1.32 | 1    | 0 |
| IPR021320     | 1.03 | 0    | 1.03 | 0    | 0 |
| IPR021321     | 1.27 | 0    | 1.27 | 0    | 0 |
| IPR021328     | 3.1  | 0    | 3.1  | 0    | 0 |
| IPR021329     | 1.04 | 0    | 1.04 | 0    | 0 |
| IPR000369     | 3.5  | 3.5  | 0    | 0    | 0 |
| IPR000366     | 1.04 | 1.04 | 0    | 0    | 0 |
| IPR018898     | 1    | 0    | 1    | 0    | 0 |
| IPR018899     | 2.25 | 0    | 2.25 | 0    | 0 |
| IPR018894     | 1.7  | 0    | 1.7  | 0    | 0 |
| IPR018895     | 1.05 | 0    | 1.05 | 0    | 0 |
| IPR018893     | 1.03 | 0    | 1.03 | 0    | 0 |
| IPR016948     | 1    | 0    | 1    | 0    | 0 |

|                |      |      |      |      |   |
|----------------|------|------|------|------|---|
| IPR016944      | 1.38 | 0    | 1.38 | 0    | 0 |
| PF11443        | 2.86 | 3.06 | 1.67 | 0    | 0 |
| IPR016946      | 1    | 0    | 1    | 0    | 0 |
| IPR016942      | 1    | 0    | 1    | 0    | 0 |
| PTHR13402      | 1.46 | 1.46 | 0    | 0    | 0 |
| PTHR13401      | 1.2  | 1.2  | 0    | 0    | 0 |
| PTHR13400      | 1.64 | 1.64 | 0    | 0    | 0 |
| IPR002666      | 3.12 | 3.12 | 0    | 0    | 0 |
| PTHR11712:SF23 | 1    | 0    | 1    | 0    | 0 |
| IPR004992      | 1.53 | 0    | 1.53 | 0    | 0 |
| IPR004993      | 3.25 | 10.5 | 1.55 | 0    | 0 |
| IPR012443      | 1.38 | 0    | 1.6  | 1.25 | 0 |
| MF_01861       | 1    | 0    | 1    | 0    | 0 |
| IPR010434      | 1    | 0    | 1    | 0    | 0 |
| IPR010438      | 1.45 | 0    | 1.45 | 0    | 0 |
| IPR014974      | 1.25 | 0    | 1.25 | 0    | 0 |
| IPR014972      | 1    | 0    | 1    | 0    | 0 |
| IPR014971      | 2.2  | 0    | 2.2  | 0    | 0 |
| TIGR01000      | 1.47 | 0    | 1.47 | 0    | 0 |
| PTHR10476:SF2  | 1    | 1    | 0    | 0    | 0 |
| PF10921        | 1.14 | 0    | 1.14 | 0    | 0 |
| PF10920        | 1    | 0    | 1    | 0    | 0 |
| PF10925        | 2.26 | 0    | 2.26 | 0    | 0 |
| PF10924        | 1    | 0    | 1    | 0    | 0 |
| PF11032        | 2.29 | 2.29 | 0    | 0    | 0 |
| PF11039        | 1    | 0    | 1    | 0    | 0 |
| PTHR16915      | 2.17 | 2.17 | 0    | 0    | 0 |
| PTHR21423      | 1    | 1    | 0    | 0    | 0 |
| IPR020216      | 1.08 | 0    | 1.08 | 0    | 0 |
| PD070475       | 1.2  | 0    | 1.2  | 0    | 0 |
| PD070788       | 1    | 0    | 1    | 0    | 0 |
| TIGR03087      | 1    | 0    | 1    | 0    | 0 |
| TIGR03085      | 1    | 0    | 1    | 0    | 0 |
| TIGR03089      | 1    | 0    | 1    | 0    | 0 |
| IPR018706      | 1.03 | 1    | 1.03 | 0    | 0 |
| TIGR02680      | 1.16 | 0    | 1.16 | 0    | 0 |
| IPR021658      | 1.6  | 0    | 1.6  | 0    | 0 |
| IPR021659      | 1.07 | 1.43 | 1    | 0    | 0 |
| PTHR22949      | 1    | 1    | 0    | 0    | 0 |
| TIGR00857      | 1    | 0    | 1    | 0    | 0 |
| PTHR23312:SF5  | 2    | 2    | 0    | 0    | 0 |
| IPR006721      | 1.33 | 1.33 | 0    | 0    | 0 |
| IPR006728      | 4.1  | 0    | 4.1  | 0    | 0 |
| PTHR19288:SF4  | 1.79 | 1.79 | 0    | 0    | 0 |
| PTHR19288:SF6  | 1.17 | 1.17 | 0    | 0    | 0 |
| PTHR19288:SF1  | 1    | 1    | 1    | 0    | 0 |
| PTHR19288:SF3  | 1.06 | 1    | 1.06 | 0    | 0 |
| PD181926       | 1    | 0    | 1    | 0    | 0 |
| IPR001733      | 1    | 1    | 0    | 1    | 0 |
| PF10844        | 1.22 | 0    | 1.22 | 0    | 0 |
| IPR013493      | 1.17 | 0    | 1.17 | 0    | 0 |
| IPR013494      | 1.21 | 0    | 1.21 | 0    | 0 |
| MF_00575       | 1    | 0    | 1    | 0    | 0 |
| PTHR10194:SF7  | 1.8  | 1.8  | 0    | 0    | 0 |
| PTHR13333:SF3  | 1    | 1    | 0    | 0    | 0 |
| IPR008518      | 1.25 | 1.25 | 0    | 0    | 0 |
| IPR013726      | 1.11 | 1.11 | 0    | 0    | 0 |
| IPR008513      | 1.02 | 0    | 1.02 | 1.12 | 0 |
| IPR008515      | 1.03 | 0    | 1.03 | 1    | 0 |
| IPR021519      | 1.1  | 0    | 1.1  | 0    | 0 |
| IPR021518      | 1    | 1    | 1    | 0    | 0 |
| IPR021513      | 1.02 | 0    | 1.02 | 0    | 0 |
| IPR021512      | 1.22 | 0    | 1.22 | 0    | 0 |
| IPR021515      | 1    | 0    | 1    | 0    | 0 |
| IPR021517      | 1    | 0    | 1    | 0    | 0 |
| PTHR12963      | 1.5  | 1.57 | 1    | 0    | 0 |
| PD116027       | 1    | 0    | 1    | 0    | 0 |
| IPR009390      | 1.04 | 0    | 1.04 | 0    | 0 |
| IPR009392      | 6.44 | 6.44 | 0    | 0    | 0 |

|                |      |      |      |      |   |
|----------------|------|------|------|------|---|
| IPR009394      | 1.03 | 0    | 1.03 | 0    | 0 |
| PTHR10887:SF14 | 1    | 1    | 1    | 0    | 0 |
| PTHR14062      | 2    | 1    | 2.25 | 0    | 0 |
| IPR010604      | 1.38 | 1.38 | 0    | 0    | 0 |
| IPR014580      | 1.06 | 0    | 1.06 | 0    | 0 |
| IPR014584      | 1    | 0    | 1    | 0    | 0 |
| IPR017057      | 1    | 1    | 0    | 0    | 0 |
| IPR017059      | 1    | 0    | 0    | 1    | 0 |
| PF10227        | 1.32 | 1.32 | 0    | 0    | 0 |
| IPR021455      | 1.15 | 2    | 1.14 | 0    | 0 |
| IPR007947      | 1.9  | 1.9  | 0    | 0    | 0 |
| IPR007944      | 1.28 | 1    | 1.28 | 0    | 0 |
| IPR007945      | 1.15 | 1.15 | 0    | 0    | 0 |
| TIGR02215      | 1.04 | 0    | 1.04 | 0    | 0 |
| TIGR02219      | 1    | 0    | 1    | 0    | 0 |
| PTHR21924      | 1.42 | 1.42 | 0    | 0    | 0 |
| PTHR21926      | 1    | 1    | 0    | 0    | 0 |
| PTHR21922      | 2.14 | 2.14 | 0    | 0    | 0 |
| PF09568        | 1    | 1    | 1    | 1    | 0 |
| TIGR02968      | 1.18 | 0    | 1.18 | 0    | 0 |
| IPR012036      | 1    | 0    | 1    | 0    | 0 |
| IPR012037      | 1.5  | 0    | 1.5  | 0    | 0 |
| IPR012031      | 1.19 | 0    | 0    | 1.19 | 0 |
| IPR012033      | 1.07 | 0    | 0    | 1.07 | 0 |
| IPR019664      | 1    | 0    | 1    | 0    | 0 |
| IPR019666      | 1.02 | 0    | 1.02 | 0    | 0 |
| IPR019667      | 1    | 0    | 1    | 0    | 0 |
| IPR019660      | 1.02 | 0    | 1.02 | 0    | 0 |
| IPR019662      | 1.02 | 0    | 1.02 | 0    | 0 |
| IPR019663      | 1.02 | 0    | 1.02 | 0    | 0 |
| IPR019668      | 1    | 0    | 1    | 0    | 0 |
| IPR015568      | 1    | 1    | 0    | 0    | 0 |
| PTHR21027      | 1.19 | 1.19 | 0    | 0    | 0 |
| IPR009155      | 1.14 | 0    | 1.14 | 0    | 0 |
| TIGR01253      | 1    | 0    | 1    | 0    | 0 |
| IPR011718      | 1.02 | 1    | 1.02 | 0    | 0 |
| IPR011719      | 1.23 | 1.75 | 1.1  | 1    | 0 |
| IPR002161      | 1.03 | 1.12 | 1.02 | 1    | 0 |
| IPR009847      | 1.25 | 1.25 | 0    | 0    | 0 |
| IPR009841      | 1    | 0    | 1    | 0    | 0 |
| IPR009843      | 1.46 | 0    | 1.46 | 0    | 0 |
| IPR009842      | 1.17 | 0    | 1.17 | 0    | 0 |
| PTHR13438      | 1.57 | 1.57 | 0    | 0    | 0 |
| IPR006396      | 1.03 | 0    | 1.04 | 1    | 0 |
| IPR017217      | 1.12 | 1.12 | 0    | 0    | 0 |
| IPR017216      | 2.67 | 2.67 | 0    | 0    | 0 |
| IPR017211      | 1.13 | 0    | 1    | 1.15 | 0 |
| IPR017218      | 1.67 | 1.67 | 0    | 0    | 0 |
| PTHR12725:SF5  | 1    | 1    | 0    | 0    | 0 |
| IPR012991      | 1.33 | 0    | 1.33 | 0    | 0 |
| IPR012994      | 1.18 | 0    | 1.18 | 0    | 0 |
| IPR007448      | 1.02 | 0    | 1.02 | 0    | 0 |
| IPR007441      | 1.07 | 0    | 1.07 | 0    | 0 |
| IPR007444      | 1.77 | 0    | 1.77 | 0    | 0 |
| IPR016379      | 1.33 | 0    | 1.33 | 0    | 0 |
| IPR012372      | 1    | 0    | 0    | 1    | 0 |
| IPR012371      | 1    | 1    | 0    | 0    | 0 |
| PD067735       | 1.17 | 0    | 1.17 | 0    | 0 |
| IPR016377      | 1    | 0    | 1    | 0    | 0 |
| IPR008499      | 1.75 | 1.75 | 0    | 0    | 0 |
| PTHR13136      | 1.38 | 1.38 | 0    | 0    | 0 |
| IPR019300      | 1.08 | 0    | 1.13 | 1    | 0 |
| IPR008729      | 1.07 | 1.29 | 1    | 0    | 0 |
| IPR008721      | 1.12 | 1.12 | 0    | 0    | 0 |
| IPR014562      | 1    | 0    | 1    | 0    | 0 |
| PD128584       | 1.06 | 0    | 1.06 | 0    | 0 |
| IPR017033      | 1    | 0    | 1    | 0    | 0 |
| IPR017030      | 1.11 | 0    | 1.11 | 0    | 0 |
| IPR005779      | 1    | 0    | 0    | 1    | 0 |

|                |      |      |      |   |   |
|----------------|------|------|------|---|---|
| IPR009450      | 1.08 | 1.08 | 0    | 0 | 0 |
| PF11428        | 1    | 0    | 1    | 0 | 0 |
| PTHR16453:SF9  | 1.09 | 1.09 | 0    | 0 | 0 |
| IPR009241      | 1.79 | 0    | 1.79 | 0 | 0 |
| PD699877       | 1    | 0    | 1    | 0 | 0 |
| IPR020905      | 1.05 | 1.29 | 1    | 0 | 0 |
| PTHR23180:SF16 | 1.6  | 1.6  | 0    | 0 | 0 |
| TIGR00374      | 1.4  | 0    | 1.5  | 1 | 0 |
| PTHR15902:SF1  | 1.75 | 1.75 | 0    | 0 | 0 |
| PTHR22256      | 1    | 1    | 0    | 0 | 0 |
| IPR019142      | 1.24 | 1.24 | 0    | 0 | 0 |
| IPR019146      | 1.16 | 1.16 | 0    | 0 | 0 |
| IPR019149      | 1.24 | 1.35 | 1.12 | 0 | 0 |
| IPR018814      | 1.03 | 1.03 | 0    | 0 | 0 |
| IPR018815      | 1    | 1    | 0    | 0 | 0 |
| IPR021941      | 1.6  | 0    | 1.6  | 0 | 0 |
| IPR021946      | 1.67 | 0    | 1.67 | 0 | 0 |
| IPR021947      | 1.52 | 1    | 1.55 | 0 | 0 |
| IPR021945      | 1.21 | 0    | 1.21 | 0 | 0 |
| IPR005579      | 1.02 | 1.02 | 0    | 0 | 0 |
| IPR009294      | 1.59 | 1.59 | 0    | 0 | 0 |
| IPR005574      | 1.09 | 1.42 | 0    | 1 | 0 |
| IPR009296      | 1.01 | 0    | 1.01 | 0 | 0 |
| IPR014468      | 1    | 0    | 1    | 0 | 0 |
| IPR013965      | 1    | 1    | 0    | 0 | 0 |
| IPR013966      | 1    | 1    | 0    | 0 | 0 |
| IPR013963      | 1    | 1    | 0    | 0 | 0 |
| IPR003066      | 1    | 0    | 1    | 0 | 0 |
| IPR003063      | 1    | 0    | 1    | 0 | 0 |
| MF_00261       | 1    | 0    | 0    | 1 | 0 |
| IPR009933      | 1    | 0    | 1    | 0 | 0 |
| IPR004308      | 1.32 | 1.32 | 0    | 0 | 0 |
| PTHR23346:SF2  | 1.12 | 1.12 | 0    | 0 | 0 |
| IPR014456      | 1    | 0    | 1    | 0 | 0 |
| PF05575        | 1    | 0    | 1    | 1 | 0 |
| TIGR03552      | 1    | 0    | 1    | 0 | 0 |
| PTHR22497      | 1.79 | 1.79 | 0    | 0 | 0 |
| TIGR02609      | 1    | 0    | 1    | 0 | 0 |
| PTHR23158:SF1  | 1.33 | 1.33 | 0    | 0 | 0 |
| TIGR03233      | 1    | 0    | 1    | 1 | 0 |
| TIGR03238      | 1    | 0    | 1    | 0 | 0 |
| IPR016584      | 1    | 0    | 1    | 0 | 0 |
| IPR016875      | 1    | 0    | 1    | 0 | 0 |
| IPR016870      | 1.05 | 0    | 1.05 | 0 | 0 |
| TIGR02187      | 1    | 0    | 1    | 1 | 0 |
| IPR016871      | 1    | 0    | 1    | 0 | 0 |
| IPR007019      | 1.21 | 1.21 | 0    | 0 | 0 |
| IPR007011      | 7.4  | 9    | 1    | 0 | 0 |
| MF_00067       | 1.03 | 0    | 1.03 | 0 | 0 |
| MF_00068       | 1    | 0    | 1    | 0 | 0 |
| IPR013417      | 1.07 | 0    | 1.07 | 0 | 0 |
| IPR000794      | 1    | 1    | 1    | 0 | 0 |
| IPR000249      | 7.25 | 0    | 7.25 | 0 | 0 |
| TIGR02905      | 1    | 0    | 1    | 0 | 0 |
| PD103659       | 1    | 1    | 0    | 0 | 0 |
| PTHR18640:SF3  | 1    | 1    | 0    | 0 | 0 |
| IPR012451      | 1.6  | 0    | 1.6  | 0 | 0 |
| IPR009649      | 1.47 | 0    | 1.47 | 0 | 0 |
| IPR021591      | 1.67 | 1.67 | 0    | 0 | 0 |
| IPR021599      | 1    | 0    | 1    | 0 | 0 |
| IPR021598      | 1.17 | 0    | 1.17 | 0 | 0 |
| IPR022024      | 2.34 | 2.34 | 0    | 0 | 0 |
| IPR022028      | 1.07 | 0    | 1.07 | 0 | 0 |
| IPR011224      | 1    | 0    | 1    | 0 | 0 |
| IPR011226      | 1    | 0    | 1    | 0 | 0 |
| IPR011220      | 1.12 | 0    | 1.12 | 0 | 0 |
| IPR011223      | 1.39 | 0    | 1.39 | 0 | 0 |
| IPR011228      | 1.36 | 0    | 1.36 | 0 | 0 |
| IPR004893      | 1.02 | 0    | 1.02 | 0 | 0 |

|               |       |       |      |      |   |
|---------------|-------|-------|------|------|---|
| PTHR13697     | 1     | 1     | 0    | 0    | 0 |
| IPR015102     | 1.04  | 0     | 1.03 | 1.25 | 0 |
| IPR015105     | 1     | 0     | 1    | 0    | 0 |
| IPR002490     | 1.88  | 3.14  | 1.12 | 1.07 | 0 |
| IPR002494     | 22.67 | 22.67 | 0    | 0    | 0 |
| IPR010574     | 1.01  | 0     | 1.01 | 0    | 0 |
| IPR010688     | 1.14  | 0     | 1.14 | 0    | 0 |
| IPR010680     | 1.6   | 0     | 1.6  | 0    | 0 |
| PTHR10340     | 1.33  | 1.33  | 0    | 0    | 0 |
| MF_01111      | 1     | 0     | 0    | 1    | 0 |
| IPR007979     | 4.75  | 0     | 4.75 | 0    | 0 |
| IPR007970     | 9.42  | 9.42  | 0    | 0    | 0 |
| IPR013883     | 1.14  | 1.14  | 0    | 0    | 0 |
| PTHR23303:SF3 | 1.2   | 1.2   | 0    | 0    | 0 |
| PTHR15599     | 1.33  | 1.33  | 0    | 0    | 0 |
| PTHR15598     | 1.14  | 1.14  | 0    | 0    | 0 |
| IPR016367     | 1.05  | 0     | 1.05 | 0    | 0 |
| IPR012863     | 1.29  | 0     | 1.29 | 0    | 0 |
| PD177356      | 1     | 0     | 1    | 0    | 0 |
| PF03219       | 3.35  | 4.2   | 3.04 | 0    | 0 |
| IPR008544     | 2.71  | 0     | 2.71 | 0    | 0 |
| TIGR03459     | 1     | 0     | 1    | 0    | 0 |
| IPR011688     | 1.93  | 0     | 1.93 | 0    | 0 |
| PTHR23191:SF1 | 1     | 1     | 0    | 0    | 0 |
| PTHR23191:SF2 | 1.2   | 1.2   | 0    | 0    | 0 |
| PTHR22042     | 3.67  | 3.67  | 0    | 0    | 0 |
| PTHR12456:SF8 | 1.92  | 1.92  | 0    | 0    | 0 |
| IPR021753     | 1     | 0     | 1    | 0    | 0 |
| IPR021751     | 1.26  | 0     | 1.26 | 0    | 0 |
| IPR022224     | 1     | 0     | 1    | 0    | 0 |
| IPR008865     | 1.13  | 0     | 1.13 | 0    | 0 |
| IPR008861     | 1.31  | 1     | 1.31 | 0    | 0 |
| IPR016514     | 1     | 0     | 1    | 0    | 0 |
| PTHR10963:SF2 | 3.17  | 3.17  | 0    | 0    | 0 |
| IPR003432     | 1     | 0     | 1    | 0    | 0 |
| IPR007229     | 1     | 1     | 1    | 0    | 0 |
| IPR007227     | 1.01  | 0     | 1.01 | 0    | 0 |
| IPR008412     | 1.4   | 1.4   | 0    | 0    | 0 |
| IPR021259     | 1.17  | 2     | 1.14 | 0    | 0 |
| IPR019381     | 1.59  | 1.59  | 0    | 0    | 0 |
| IPR021250     | 1.12  | 0     | 1.12 | 0    | 0 |
| PTHR12270:SF3 | 1.21  | 1.21  | 0    | 0    | 0 |
| PTHR12843     | 1     | 1     | 0    | 0    | 0 |
| IPR016833     | 1.01  | 1     | 1.01 | 0    | 0 |
| IPR016834     | 1     | 0     | 1    | 0    | 0 |
| IPR005265     | 1.14  | 0     | 1.14 | 0    | 0 |
| IPR018477     | 1.39  | 1.39  | 0    | 0    | 0 |
| IPR018472     | 1.05  | 1.05  | 0    | 0    | 0 |
| IPR005489     | 7.33  | 0     | 0    | 7.33 | 0 |
| IPR005485     | 1.2   | 1.2   | 0    | 0    | 0 |
| PTHR12610:SF2 | 1.14  | 1.14  | 0    | 0    | 0 |
| IPR006901     | 1.01  | 0     | 1.01 | 0    | 0 |
| PTHR14299     | 1     | 1     | 0    | 0    | 0 |
| PTHR12432     | 2.17  | 2.17  | 0    | 0    | 0 |
| IPR016441     | 1.2   | 1.2   | 0    | 0    | 0 |
| PTHR19378     | 1.64  | 1.64  | 0    | 0    | 0 |
| IPR009709     | 1     | 0     | 1    | 0    | 0 |
| PTHR21583:SF1 | 1     | 1     | 0    | 0    | 0 |
| IPR012089     | 1     | 1     | 1    | 1    | 0 |
| PF09691       | 1.2   | 0     | 1.2  | 0    | 0 |
| IPR009669     | 1.17  | 0     | 1.17 | 0    | 0 |
| PTHR23287:SF1 | 1.14  | 1.14  | 0    | 0    | 0 |
| IPR020325     | 1     | 0     | 1    | 0    | 0 |
| IPR020327     | 1     | 0     | 1    | 0    | 0 |
| IPR020326     | 1.67  | 0     | 1.67 | 0    | 0 |
| IPR012554     | 1     | 0     | 1    | 0    | 0 |
| IPR021497     | 1.07  | 1     | 1.07 | 0    | 0 |
| IPR021491     | 1.02  | 0     | 1.02 | 0    | 0 |
| IPR021492     | 1     | 0     | 1    | 0    | 0 |

|                |      |      |      |      |   |
|----------------|------|------|------|------|---|
| TIGR03647      | 1.04 | 0    | 1.04 | 1    | 0 |
| TIGR03649      | 1.33 | 1.33 | 0    | 0    | 0 |
| IPR018671      | 1.11 | 0    | 1.11 | 0    | 0 |
| IPR018672      | 1.02 | 0    | 1.02 | 0    | 0 |
| IPR018674      | 1.29 | 0    | 1.26 | 3    | 0 |
| IPR018676      | 1.06 | 0    | 1.04 | 1.09 | 0 |
| IPR009216      | 1.05 | 0    | 1.05 | 0    | 0 |
| IPR009211      | 1.14 | 0    | 1.14 | 0    | 0 |
| IPR009218      | 1.03 | 1.25 | 1.02 | 0    | 0 |
| IPR003427      | 1    | 0    | 1    | 1    | 0 |
| TIGR00690      | 1    | 0    | 1    | 0    | 0 |
| IPR002041      | 1.77 | 1.77 | 0    | 0    | 0 |
| IPR002042      | 2.36 | 2.4  | 2.28 | 0    | 0 |
| IPR009964      | 1.03 | 0    | 1.03 | 0    | 0 |
| IPR009962      | 1.63 | 0    | 1.63 | 0    | 0 |
| IPR009963      | 2    | 0    | 2    | 0    | 0 |
| IPR009968      | 1    | 0    | 1    | 0    | 0 |
| IPR017154      | 1.03 | 0    | 1.04 | 1    | 0 |
| IPR010875      | 3.33 | 0    | 3.33 | 0    | 0 |
| IPR007211      | 1.3  | 0    | 1.3  | 1.17 | 0 |
| IPR008238      | 1.75 | 1.75 | 0    | 0    | 0 |
| PTHR16095:SF8  | 1.33 | 1.33 | 0    | 0    | 0 |
| IPR019882      | 1.06 | 0    | 1.06 | 0    | 0 |
| IPR005384      | 3.67 | 3.67 | 0    | 0    | 0 |
| IPR019263      | 1.15 | 1.15 | 0    | 0    | 0 |
| IPR019265      | 1.17 | 1.17 | 0    | 0    | 0 |
| IPR019266      | 1.48 | 1.48 | 0    | 0    | 0 |
| IPR019268      | 1.1  | 1.5  | 1.05 | 0    | 0 |
| IPR008608      | 1.75 | 1.75 | 0    | 0    | 0 |
| IPR008605      | 3.75 | 3.75 | 0    | 0    | 0 |
| IPR008606      | 1.79 | 1.79 | 0    | 0    | 0 |
| IPR004381      | 1.33 | 1.08 | 1.34 | 0    | 0 |
| IPR008603      | 1.39 | 1.39 | 0    | 0    | 0 |
| IPR004929      | 2.37 | 0    | 2.37 | 0    | 0 |
| IPR004928      | 1.78 | 1.78 | 0    | 0    | 0 |
| IPR009553      | 1.39 | 1    | 1.4  | 0    | 0 |
| IPR007460      | 1.74 | 0    | 1.74 | 0    | 0 |
| IPR011394      | 1    | 0    | 1    | 0    | 0 |
| IPR011396      | 1.05 | 0    | 1.05 | 0    | 0 |
| IPR011397      | 1.28 | 0    | 1.23 | 1.8  | 0 |
| IPR011648      | 1    | 0    | 1    | 0    | 0 |
| PTHR14164:SF2  | 2.2  | 2.2  | 0    | 0    | 0 |
| PTHR14482      | 2    | 2    | 0    | 0    | 0 |
| PTHR14484      | 2.2  | 2.2  | 0    | 0    | 0 |
| PTHR22414      | 1    | 1    | 0    | 0    | 0 |
| PTHR22415      | 1.08 | 1.08 | 0    | 0    | 0 |
| PTHR22418      | 1.23 | 1.23 | 0    | 0    | 0 |
| PTHR21147      | 1.13 | 1.13 | 0    | 0    | 0 |
| PTHR21148      | 1.18 | 1.18 | 0    | 0    | 0 |
| PD012572       | 1    | 0    | 1    | 0    | 0 |
| PF11085        | 1    | 0    | 1    | 0    | 0 |
| PF11080        | 1.43 | 0    | 1.43 | 0    | 0 |
| TIGR02108      | 1.05 | 0    | 1.05 | 0    | 0 |
| PTHR10992:SF20 | 1.29 | 1.44 | 1.26 | 1    | 0 |
| PF09761        | 1.14 | 1.14 | 0    | 0    | 0 |
| IPR020799      | 4.67 | 4.67 | 0    | 0    | 0 |
| IPR020796      | 1.5  | 1.5  | 0    | 0    | 0 |
| IPR007729      | 1.22 | 0    | 1.22 | 0    | 0 |
| IPR007721      | 1.4  | 1    | 1.41 | 0    | 0 |
| TIGR02811      | 1.37 | 0    | 1.37 | 0    | 0 |
| IPR001447      | 1.5  | 2.7  | 1.3  | 0    | 0 |
| IPR001448      | 5.23 | 0    | 5.23 | 0    | 0 |
| PTHR11851:SF58 | 2.25 | 2.25 | 0    | 0    | 0 |
| IPR021048      | 1.14 | 0    | 1.14 | 0    | 0 |
| PTHR23193:SF4  | 1.25 | 1.25 | 0    | 0    | 0 |
| PTHR23193:SF5  | 1.73 | 1.73 | 0    | 0    | 0 |
| PTHR23193:SF2  | 1.2  | 1.2  | 0    | 0    | 0 |
| IPR011400      | 1    | 1    | 0    | 0    | 0 |
| PTHR14645      | 1.33 | 1.33 | 0    | 0    | 0 |

|                |       |       |      |      |   |
|----------------|-------|-------|------|------|---|
| IPR014631      | 1.28  | 1.28  | 0    | 0    | 0 |
| IPR016676      | 1     | 0     | 1    | 0    | 0 |
| IPR016674      | 1.25  | 1.25  | 0    | 0    | 0 |
| IPR016673      | 1.75  | 1.75  | 0    | 0    | 0 |
| IPR013110      | 1.15  | 1.18  | 1.06 | 1    | 0 |
| IPR000453      | 1.06  | 1.23  | 1.05 | 1    | 0 |
| PF10840        | 1     | 0     | 1    | 0    | 0 |
| PF10843        | 1.33  | 1.33  | 0    | 0    | 0 |
| PTHR13333:SF1  | 1.06  | 1.06  | 0    | 0    | 0 |
| PTHR11360:SF9  | 1.65  | 1.65  | 0    | 0    | 0 |
| IPR004221      | 1.12  | 0     | 1.12 | 0    | 0 |
| PTHR16276      | 1.36  | 1.36  | 0    | 0    | 0 |
| IPR018943      | 1.16  | 1.16  | 0    | 0    | 0 |
| TIGR01926      | 1     | 0     | 1    | 0    | 0 |
| TIGR01921      | 1     | 0     | 1    | 0    | 0 |
| TIGR01928      | 1     | 0     | 1    | 0    | 0 |
| IPR005177      | 1.07  | 1.57  | 1.06 | 0    | 0 |
| IPR005176      | 2.45  | 2.45  | 0    | 0    | 0 |
| PTHR13000      | 1.16  | 1.16  | 0    | 0    | 0 |
| IPR008034      | 1     | 0     | 1    | 0    | 0 |
| IPR008032      | 1     | 0     | 0    | 1    | 0 |
| IPR008031      | 2     | 0     | 2    | 2    | 0 |
| PF07186        | 1.29  | 0     | 1.29 | 0    | 0 |
| PTHR21642:SF1  | 3     | 3     | 0    | 0    | 0 |
| PTHR23170      | 2     | 2     | 0    | 0    | 0 |
| PTHR14362      | 1.67  | 1.67  | 0    | 0    | 0 |
| PTHR22622      | 1.08  | 1.08  | 0    | 0    | 0 |
| TIGR02491      | 1     | 0     | 1    | 0    | 0 |
| IPR019320      | 1.14  | 1.14  | 0    | 0    | 0 |
| TIGR03172      | 1     | 1     | 1    | 1    | 0 |
| TIGR03177      | 1.06  | 0     | 1.06 | 0    | 0 |
| TIGR03174      | 1     | 0     | 1    | 1    | 0 |
| PTHR10074:SF57 | 1.47  | 1.75  | 1.19 | 0    | 0 |
| MF_00146       | 1     | 1     | 1    | 0    | 0 |
| PD080110       | 1     | 1     | 0    | 0    | 0 |
| PTHR12771:SF9  | 2.75  | 2.75  | 0    | 0    | 0 |
| PTHR11785:SF58 | 1.12  | 1.12  | 0    | 0    | 0 |
| PTHR23116:SF1  | 1     | 1     | 0    | 0    | 0 |
| PF06555        | 1.35  | 0     | 1.38 | 1    | 0 |
| PTHR16070      | 2.4   | 2.4   | 0    | 0    | 0 |
| IPR012080      | 1     | 0     | 1    | 0    | 0 |
| IPR012550      | 1.09  | 1     | 1.09 | 0    | 0 |
| PTHR12553:SF3  | 1.22  | 1.22  | 0    | 0    | 0 |
| IPR009727      | 1.05  | 0     | 1.05 | 0    | 0 |
| IPR009729      | 3.2   | 3.75  | 1    | 0    | 0 |
| IPR001259      | 20.38 | 20.38 | 0    | 0    | 0 |
| PTHR13244      | 1     | 1     | 0    | 0    | 0 |
| PTHR13247      | 1.23  | 1.23  | 0    | 0    | 0 |
| IPR009181      | 1.22  | 0     | 0    | 1.22 | 0 |
| IPR009183      | 1.33  | 0     | 0    | 1.33 | 0 |
| IPR015029      | 1.04  | 0     | 1.04 | 0    | 0 |
| IPR015021      | 1.5   | 1.5   | 0    | 0    | 0 |
| IPR002753      | 1.8   | 0     | 0    | 1.8  | 0 |
| IPR002758      | 1.23  | 0     | 1.18 | 1.73 | 0 |
| IPR006980      | 2.2   | 0     | 2.5  | 1    | 0 |
| IPR003805      | 1.05  | 0     | 1.05 | 1    | 0 |
| IPR003804      | 1.45  | 0     | 1.47 | 1.18 | 0 |
| PD020942       | 1.31  | 0     | 1.31 | 0    | 0 |
| IPR014849      | 1     | 1     | 0    | 0    | 0 |
| IPR014843      | 1.25  | 1.33  | 1    | 0    | 0 |
| IPR014841      | 1     | 1     | 0    | 0    | 0 |
| IPR014840      | 1     | 1     | 0    | 0    | 0 |
| IPR014845      | 1.36  | 1     | 1.44 | 1    | 0 |
| PTHR19269:SF3  | 1     | 1     | 0    | 0    | 0 |
| PTHR21846      | 1.07  | 1.07  | 0    | 0    | 0 |
| PTHR21844      | 1.11  | 1.11  | 0    | 0    | 0 |
| PTHR21845      | 1.38  | 1.38  | 0    | 0    | 0 |
| TIGR01881      | 1.5   | 0     | 0    | 1.5  | 0 |
| TIGR01884      | 1.12  | 0     | 0    | 1.12 | 0 |



|               |      |      |      |      |   |
|---------------|------|------|------|------|---|
| TIGR01889     | 7.94 | 0    | 7.94 | 0    | 0 |
| IPR014245     | 1.09 | 0    | 1.09 | 0    | 0 |
| PF10748       | 1.02 | 0    | 1.02 | 0    | 0 |
| PTHR23033     | 1.07 | 1.07 | 0    | 0    | 0 |
| PTHR23035     | 1.8  | 1.8  | 0    | 0    | 0 |
| PF06408       | 1.07 | 0    | 1.07 | 1    | 0 |
| PTHR14972:SF3 | 1.6  | 1.6  | 0    | 0    | 0 |
| PTHR14972:SF1 | 1.33 | 1.33 | 0    | 0    | 0 |
| IPR021414     | 1.09 | 1.62 | 1    | 1.17 | 0 |
| IPR021415     | 1.45 | 0    | 1.45 | 0    | 0 |
| IPR021412     | 1.05 | 0    | 1.05 | 0    | 0 |
| IPR021413     | 1.17 | 2    | 1.15 | 0    | 0 |
| PTHR21475     | 1.11 | 1.11 | 0    | 0    | 0 |
| TIGR00613     | 1    | 0    | 1    | 0    | 0 |
| TIGR00611     | 1    | 0    | 1    | 0    | 0 |
| TIGR00618     | 1    | 0    | 1    | 0    | 0 |
| IPR007078     | 1.04 | 0    | 1.04 | 0    | 0 |
| IPR007079     | 1.04 | 0    | 1.04 | 0    | 0 |
| MF_00081      | 1    | 0    | 1    | 0    | 0 |
| IPR007839     | 1.07 | 0    | 2    | 1.03 | 0 |
| IPR007837     | 2.62 | 2    | 2.62 | 0    | 0 |
| MF_01421      | 1    | 0    | 1    | 0    | 0 |
| IPR015288     | 1    | 0    | 0    | 1    | 0 |
| IPR015287     | 1.18 | 0    | 1.18 | 0    | 0 |
| IPR019704     | 1    | 0    | 1    | 0    | 0 |
| IPR007304     | 1.19 | 1.19 | 0    | 0    | 0 |
| IPR007305     | 1.64 | 1.64 | 0    | 0    | 0 |
| IPR007306     | 1.11 | 1.11 | 0    | 0    | 0 |
| PF08616       | 1.21 | 1.21 | 0    | 0    | 0 |
| PTHR18849     | 2.1  | 2.1  | 0    | 0    | 0 |
| PTHR15337:SF1 | 2.17 | 2.17 | 0    | 0    | 0 |
| IPR021357     | 1.01 | 0    | 1.01 | 0    | 0 |
| IPR021354     | 1.08 | 0    | 1.08 | 0    | 0 |
| IPR021351     | 1    | 0    | 1    | 0    | 0 |
| IPR008686     | 3.67 | 3.67 | 0    | 0    | 0 |
| IPR008681     | 1.26 | 0    | 1.26 | 0    | 0 |
| IPR016974     | 1    | 0    | 1    | 0    | 0 |
| IPR016977     | 1    | 0    | 1    | 0    | 0 |
| IPR016971     | 1.83 | 1.83 | 0    | 0    | 0 |
| IPR005304     | 1.19 | 1.23 | 0    | 1.08 | 0 |
| IPR018536     | 2.6  | 0    | 2.6  | 0    | 0 |
| IPR009781     | 1.08 | 0    | 1.08 | 0    | 0 |
| PF12597       | 1.07 | 1.07 | 0    | 0    | 0 |
| IPR011313     | 1    | 0    | 0    | 1    | 0 |
| IPR011314     | 1    | 0    | 0    | 1    | 0 |
| IPR011317     | 1    | 0    | 0    | 1    | 0 |
| PTHR13453     | 1.19 | 1.19 | 0    | 0    | 0 |
| PTHR13459     | 1.39 | 1.39 | 0    | 0    | 0 |
| PF12048       | 1.02 | 0    | 1.02 | 0    | 0 |
| PF11583       | 1.94 | 0    | 1.95 | 1    | 0 |
| PTHR17206     | 1.4  | 1.4  | 0    | 0    | 0 |
| IPR006829     | 2.79 | 1    | 2.84 | 0    | 0 |
| IPR010190     | 1    | 0    | 1    | 0    | 0 |
| PTHR15208     | 1.23 | 1.23 | 0    | 0    | 0 |
| IPR016568     | 1.2  | 0    | 1.2  | 0    | 0 |
| IPR016560     | 1    | 1    | 0    | 0    | 0 |
| IPR016566     | 1    | 0    | 1    | 0    | 0 |
| IPR016565     | 1.2  | 1.2  | 0    | 0    | 0 |
| PF10970       | 1    | 0    | 1    | 0    | 0 |
| PD396235      | 1    | 0    | 1    | 0    | 0 |
| PTHR20904     | 2    | 2    | 0    | 0    | 0 |
| PTHR20905     | 3.62 | 3.62 | 0    | 0    | 0 |
| PTHR20906     | 1.14 | 1.14 | 0    | 0    | 0 |
| PTHR20907     | 2.36 | 2.36 | 0    | 0    | 0 |
| PTHR20909     | 2.42 | 2.42 | 0    | 0    | 0 |
| PTHR22123     | 1.08 | 1.08 | 0    | 0    | 0 |
| IPR020171     | 1    | 0    | 1    | 0    | 0 |
| IPR020173     | 1.06 | 0    | 1.06 | 0    | 0 |
| TIGR02894     | 2.04 | 0    | 2.04 | 0    | 0 |

|                |      |      |      |     |   |
|----------------|------|------|------|-----|---|
| IPR008394      | 1.2  | 0    | 1.2  | 0   | 0 |
| PD030263       | 1    | 0    | 0    | 1   | 0 |
| IPR021624      | 1    | 1    | 0    | 0   | 0 |
| PD049651       | 1    | 0    | 1    | 0   | 0 |
| TIGR03071      | 1    | 0    | 1    | 0   | 0 |
| TIGR03076      | 1    | 0    | 1    | 0   | 0 |
| IPR018735      | 1.05 | 0    | 1.05 | 0   | 0 |
| IPR018736      | 1.01 | 1    | 1.01 | 0   | 0 |
| IPR018731      | 1.45 | 1.45 | 0    | 0   | 0 |
| IPR018733      | 1.82 | 0    | 1.82 | 0   | 0 |
| IPR018732      | 1.74 | 1.74 | 0    | 0   | 0 |
| IPR015277      | 1    | 0    | 1    | 0   | 0 |
| IPR015278      | 1    | 0    | 1    | 0   | 0 |
| TIGR02302      | 1    | 0    | 1    | 0   | 0 |
| TIGR02304      | 1    | 0    | 1    | 0   | 0 |
| TIGR00792      | 2.2  | 0    | 2.2  | 0   | 0 |
| IPR005854      | 1.2  | 1.33 | 1    | 0   | 0 |
| TIGR00862      | 3.8  | 3.8  | 0    | 0   | 0 |
| PD439017       | 1    | 0    | 1    | 0   | 0 |
| IPR007986      | 1.6  | 0    | 1.6  | 0   | 0 |
| IPR007985      | 2.42 | 0    | 2.42 | 0   | 0 |
| IPR010352      | 1.24 | 0    | 1.24 | 0   | 0 |
| IPR010356      | 1.13 | 0    | 1.13 | 0   | 0 |
| IPR010354      | 1.22 | 2.43 | 1.13 | 0   | 0 |
| IPR010358      | 1.6  | 1.6  | 0    | 0   | 0 |
| PTHR12934:SF1  | 1    | 1    | 0    | 0   | 0 |
| IPR003180      | 1.07 | 1.92 | 1.03 | 1   | 0 |
| MF_01658       | 1    | 0    | 1    | 0   | 0 |
| PTHR19237      | 1.14 | 1.17 | 1    | 0   | 0 |
| MF_00387       | 1    | 0    | 1    | 0   | 0 |
| IPR003157      | 1    | 0    | 1    | 0   | 0 |
| IPR008520      | 2.46 | 0    | 2.46 | 0   | 0 |
| IPR008524      | 1    | 0    | 1    | 0   | 0 |
| IPR008526      | 1.03 | 1    | 1.03 | 0   | 0 |
| IPR008529      | 2.08 | 0    | 2.08 | 0   | 0 |
| PTHR13083      | 1.06 | 1.06 | 0    | 0   | 0 |
| PF06137        | 5    | 5    | 0    | 0   | 0 |
| PF10575        | 1.46 | 0    | 1.46 | 0   | 0 |
| IPR009693      | 1.06 | 0    | 1.06 | 0   | 0 |
| PF12363        | 1.33 | 0    | 1.33 | 0   | 0 |
| IPR011122      | 1.27 | 0    | 1.27 | 0   | 0 |
| PTHR23247      | 4.56 | 4.56 | 0    | 0   | 0 |
| PD071248       | 1    | 0    | 1    | 0   | 0 |
| IPR014573      | 1    | 0    | 0    | 1   | 0 |
| IPR010653      | 1.1  | 0    | 1.1  | 0   | 0 |
| IPR014574      | 1    | 0    | 0    | 1   | 0 |
| IPR017008      | 1.09 | 0    | 1.1  | 1   | 0 |
| IPR017000      | 3.38 | 3.38 | 0    | 0   | 0 |
| IPR017006      | 1    | 0    | 0    | 1   | 0 |
| PTHR13049      | 1    | 1    | 0    | 0   | 0 |
| IPR010591      | 1.17 | 1.17 | 0    | 0   | 0 |
| IPR019138      | 1.25 | 1.25 | 0    | 0   | 0 |
| PTHR21359      | 1.38 | 1.38 | 0    | 0   | 0 |
| PTHR21354      | 1.1  | 1.1  | 0    | 0   | 0 |
| PTHR21352      | 1.07 | 1.07 | 0    | 0   | 0 |
| TIGR02228      | 1.42 | 1    | 1.42 | 1.5 | 0 |
| IPR018981      | 1.08 | 0    | 1.08 | 0   | 0 |
| PTHR21444:SF5  | 2.6  | 2.6  | 0    | 0   | 0 |
| PTHR21972      | 1    | 1    | 0    | 0   | 0 |
| IPR000612      | 1.62 | 4.13 | 1.07 | 0   | 0 |
| TIGR02910      | 1.06 | 0    | 1.06 | 0   | 0 |
| PTHR21419:SF10 | 1.67 | 1.67 | 0    | 0   | 0 |
| PTHR18973:SF10 | 1    | 1    | 0    | 0   | 0 |
| IPR021125      | 1.05 | 0    | 1.05 | 0   | 0 |
| IPR021126      | 3.4  | 3.4  | 0    | 0   | 0 |
| IPR021123      | 2.13 | 0    | 2.13 | 0   | 0 |
| PTHR22091      | 1.29 | 1.29 | 0    | 0   | 0 |
| PTHR22095      | 1.21 | 1.21 | 0    | 0   | 0 |
| PTHR22546      | 2    | 2    | 0    | 0   | 0 |

|                |      |      |      |      |   |
|----------------|------|------|------|------|---|
| IPR019659      | 1.25 | 0    | 1.25 | 0    | 0 |
| IPR019658      | 1.78 | 0    | 1.78 | 0    | 0 |
| IPR019654      | 1.02 | 1.17 | 1    | 0    | 0 |
| IPR019657      | 1.13 | 0    | 1.13 | 0    | 0 |
| IPR019656      | 1.03 | 0    | 1.03 | 0    | 0 |
| IPR019651      | 1.13 | 1.25 | 1.09 | 0    | 0 |
| IPR019652      | 1.02 | 0    | 1.02 | 0    | 0 |
| IPR021783      | 1    | 0    | 1    | 0    | 0 |
| IPR021784      | 2.04 | 0    | 2.04 | 0    | 0 |
| IPR021787      | 1.58 | 0    | 1.58 | 0    | 0 |
| IPR021788      | 1.68 | 4.33 | 1    | 0    | 0 |
| PD191299       | 2    | 2    | 0    | 0    | 0 |
| IPR021877      | 1.2  | 0    | 1.2  | 0    | 0 |
| IPR021874      | 1.22 | 0    | 1.22 | 0    | 0 |
| IPR021879      | 1    | 0    | 1    | 0    | 0 |
| PTHR14027:SF2  | 1.14 | 1.17 | 1    | 0    | 0 |
| PTHR10779      | 1.05 | 1.05 | 0    | 0    | 0 |
| IPR009108      | 1.33 | 0    | 1    | 1.38 | 0 |
| IPR009103      | 2.67 | 2.67 | 0    | 0    | 0 |
| IPR009106      | 2    | 2    | 0    | 0    | 0 |
| IPR011728      | 1    | 0    | 1    | 0    | 0 |
| IPR007918      | 1.23 | 1.23 | 0    | 0    | 0 |
| IPR011726      | 1.05 | 0    | 1.05 | 1    | 0 |
| IPR011720      | 1    | 0    | 1    | 0    | 0 |
| IPR009814      | 2    | 0    | 2    | 0    | 0 |
| IPR007412      | 1.17 | 0    | 1.17 | 0    | 0 |
| IPR007413      | 1.02 | 0    | 1.02 | 0    | 0 |
| IPR007416      | 1.04 | 0    | 1.04 | 0    | 0 |
| IPR007417      | 1    | 0    | 0    | 1    | 0 |
| IPR016735      | 1    | 0    | 0    | 1    | 0 |
| IPR013014      | 1    | 0    | 1    | 0    | 0 |
| PTHR15654      | 1.43 | 1.43 | 0    | 0    | 0 |
| PTHR18978      | 1.75 | 1.75 | 0    | 0    | 0 |
| IPR017072      | 1    | 1    | 0    | 0    | 0 |
| PTHR13166      | 1.17 | 1.17 | 0    | 0    | 0 |
| PTHR13168      | 1.65 | 1.65 | 0    | 0    | 0 |
| PTHR13169      | 1.35 | 1.35 | 0    | 0    | 0 |
| IPR008772      | 1.06 | 0    | 1.06 | 1    | 0 |
| IPR008773      | 1.04 | 0    | 1.04 | 1    | 0 |
| PD065638       | 1    | 0    | 1    | 0    | 0 |
| PTHR22530      | 1.11 | 1.11 | 0    | 0    | 0 |
| IPR015977      | 1.22 | 1.55 | 1.18 | 1    | 0 |
| TIGR01583      | 1.1  | 0    | 1.1  | 0    | 0 |
| PTHR16266:SF2  | 1    | 1    | 0    | 0    | 0 |
| TIGR02592      | 1    | 0    | 1    | 1    | 0 |
| PTHR22422:SF1  | 1    | 1    | 0    | 0    | 0 |
| PTHR22422:SF2  | 1    | 1    | 0    | 0    | 0 |
| PTHR22708      | 1.19 | 1.19 | 0    | 0    | 0 |
| IPR003685      | 1.18 | 1.89 | 1    | 0    | 0 |
| IPR003687      | 1.12 | 1.62 | 1    | 0    | 0 |
| IPR003686      | 1.1  | 1.5  | 1    | 0    | 0 |
| IPR013252      | 1.15 | 1.15 | 0    | 0    | 0 |
| IPR013251      | 1    | 1    | 0    | 0    | 0 |
| PF08568        | 1.51 | 1.51 | 0    | 0    | 0 |
| PF08695        | 1    | 1    | 1    | 0    | 0 |
| IPR007382      | 1.05 | 0    | 1.05 | 0    | 0 |
| IPR007384      | 1.01 | 0    | 1.01 | 0    | 0 |
| IPR007385      | 1.06 | 0    | 1.06 | 0    | 0 |
| IPR007386      | 1.02 | 1    | 1.05 | 1    | 0 |
| IPR012614      | 1    | 0    | 1    | 0    | 0 |
| IPR012610      | 1.86 | 0    | 1.86 | 0    | 0 |
| IPR012611      | 1    | 0    | 1    | 0    | 0 |
| IPR012612      | 1    | 0    | 1    | 0    | 0 |
| IPR019195      | 1.04 | 1.25 | 1.03 | 1    | 0 |
| IPR019193      | 1.5  | 1.5  | 0    | 0    | 0 |
| IPR019199      | 1.5  | 0    | 1.52 | 1.36 | 0 |
| IPR018824      | 4    | 4    | 0    | 0    | 0 |
| PTHR18964:SF13 | 1    | 0    | 1    | 0    | 0 |
| PTHR10499:SF5  | 1    | 1    | 1    | 0    | 0 |

|               |      |      |      |      |   |
|---------------|------|------|------|------|---|
| IPR010446     | 1.25 | 1    | 1.27 | 0    | 0 |
| IPR010444     | 1.31 | 0    | 1.31 | 0    | 0 |
| IPR010448     | 2.37 | 2.37 | 0    | 0    | 0 |
| PF05069       | 1.27 | 0    | 1.27 | 0    | 0 |
| IPR018315     | 1.51 | 1.51 | 0    | 0    | 0 |
| PTHR11852     | 1.29 | 1.48 | 1.06 | 0    | 0 |
| IPR014924     | 1.96 | 0    | 1.96 | 0    | 0 |
| IPR014926     | 1.12 | 0    | 1.12 | 0    | 0 |
| IPR014921     | 1    | 0    | 1    | 0    | 0 |
| MF_01145      | 1    | 0    | 1    | 0    | 0 |
| PTHR14735     | 1.57 | 1.57 | 0    | 0    | 0 |
| MF_00237      | 1    | 0    | 1    | 0    | 0 |
| MF_00234      | 1    | 0    | 0    | 1    | 0 |
| PTHR22551:SF1 | 1.18 | 1.18 | 0    | 0    | 0 |
| PD822638      | 2    | 2    | 0    | 0    | 0 |
| PF03059       | 1.96 | 3.3  | 1.13 | 1.67 | 0 |
| IPR004356     | 1.19 | 0    | 1.19 | 0    | 0 |
| TIGR01637     | 1.27 | 0    | 1.27 | 0    | 0 |
| TIGR01636     | 1.38 | 0    | 1.38 | 0    | 0 |
| PTHR20988     | 1.28 | 1.28 | 0    | 0    | 0 |
| PTHR20980     | 2    | 2    | 0    | 0    | 0 |
| PTHR20983     | 1.29 | 1.29 | 0    | 0    | 0 |
| PTHR20987     | 6.36 | 6.36 | 0    | 0    | 0 |
| IPR016972     | 3    | 3    | 0    | 0    | 0 |
| IPR016978     | 1    | 0    | 1    | 0    | 0 |
| PTHR12487:SF1 | 1    | 1    | 0    | 0    | 0 |
| IPR011502     | 1.71 | 1.71 | 0    | 0    | 0 |
| PTHR22932     | 1    | 1    | 0    | 0    | 0 |
| TIGR02385     | 1.07 | 0    | 1.07 | 0    | 0 |
| PD320837      | 1.09 | 1.15 | 1.05 | 0    | 0 |
| PD492528      | 2.6  | 2.6  | 0    | 0    | 0 |
| IPR010938     | 1.02 | 0    | 1.02 | 0    | 0 |
| IPR007023     | 1.33 | 1.33 | 0    | 0    | 0 |
| IPR021093     | 1    | 0    | 1    | 0    | 0 |
| IPR021098     | 1.11 | 0    | 1.11 | 0    | 0 |
| IPR000274     | 1.03 | 2    | 1.02 | 0    | 0 |
| IPR000271     | 1.02 | 1.23 | 1.01 | 0    | 0 |
| PTHR22776:SF6 | 1.17 | 1.17 | 0    | 0    | 0 |
| IPR004598     | 1.29 | 1.3  | 1    | 0    | 0 |
| IPR012422     | 1.15 | 0    | 1.15 | 0    | 0 |
| IPR012420     | 1    | 1    | 0    | 0    | 0 |
| IPR011217     | 1    | 0    | 1    | 0    | 0 |
| IPR011213     | 1    | 0    | 1    | 0    | 0 |
| IPR019276     | 1.16 | 0    | 1.16 | 0    | 0 |
| IPR007920     | 1    | 0    | 1    | 0    | 0 |
| IPR007925     | 1.08 | 0    | 1.08 | 0    | 0 |
| IPR007927     | 1.83 | 0    | 1.83 | 0    | 0 |
| IPR016684     | 1    | 0    | 1    | 0    | 0 |
| IPR016680     | 1    | 1    | 0    | 0    | 0 |
| PTHR15099     | 1.11 | 1.11 | 0    | 0    | 0 |
| PTHR15093     | 1.33 | 1.4  | 1    | 0    | 0 |
| IPR017088     | 3.4  | 3.4  | 0    | 0    | 0 |
| PF11124       | 1    | 1    | 0    | 0    | 0 |
| PF11121       | 1.47 | 0    | 1.47 | 0    | 0 |
| IPR016885     | 1    | 0    | 1    | 0    | 0 |
| IPR016884     | 1    | 0    | 1    | 0    | 0 |
| PD177368      | 1    | 0    | 1    | 0    | 0 |
| IPR016888     | 1.05 | 0    | 1.05 | 0    | 0 |
| TIGR00173     | 1    | 0    | 1    | 0    | 0 |
| TIGR00284     | 1    | 0    | 0    | 1    | 0 |
| TIGR00282     | 1    | 0    | 1    | 0    | 0 |
| IPR021880     | 1.62 | 0    | 1.62 | 0    | 0 |
| PTHR22019     | 1.25 | 1.25 | 0    | 0    | 0 |
| PTHR22016     | 1.08 | 1.08 | 0    | 0    | 0 |
| IPR021708     | 1.03 | 0    | 1.03 | 0    | 0 |
| IPR021709     | 2.2  | 2.2  | 0    | 0    | 0 |
| IPR009569     | 1.52 | 2    | 1.51 | 0    | 0 |
| IPR021705     | 1    | 0    | 1    | 0    | 0 |
| IPR021707     | 1.28 | 0    | 1.28 | 0    | 0 |

|                |       |      |       |      |   |
|----------------|-------|------|-------|------|---|
| IPR009561      | 1.19  | 0    | 1.29  | 1    | 0 |
| TIGR00905      | 1.14  | 0    | 1.14  | 0    | 0 |
| PTHR21094      | 1.17  | 1.17 | 0     | 0    | 0 |
| PTHR21097      | 1.08  | 1.08 | 0     | 0    | 0 |
| IPR008855      | 1.33  | 1.33 | 0     | 0    | 0 |
| PD460230       | 1     | 0    | 1     | 0    | 0 |
| IPR009896      | 1     | 0    | 1     | 0    | 0 |
| IPR010010      | 1     | 1    | 1     | 0    | 0 |
| IPR008805      | 1.62  | 1.62 | 0     | 0    | 0 |
| PF09677        | 1.27  | 0    | 1.27  | 0    | 0 |
| IPR007497      | 1.22  | 1.21 | 1.23  | 1.06 | 0 |
| IPR017245      | 1.17  | 1.17 | 0     | 0    | 0 |
| IPR017246      | 1.12  | 1.12 | 0     | 0    | 0 |
| IPR017242      | 1.23  | 1.23 | 0     | 0    | 0 |
| IPR017243      | 1.29  | 1.29 | 0     | 0    | 0 |
| IPR017248      | 2.25  | 2.25 | 0     | 0    | 0 |
| PTHR22875:SF1  | 1.61  | 1.61 | 0     | 0    | 0 |
| IPR003446      | 1.26  | 0    | 1.26  | 0    | 0 |
| IPR013635      | 1.03  | 1.03 | 0     | 0    | 0 |
| IPR019359      | 1.57  | 1.57 | 0     | 0    | 0 |
| IPR019354      | 1.93  | 1.93 | 0     | 0    | 0 |
| IPR019355      | 1.45  | 1.45 | 0     | 0    | 0 |
| IPR019356      | 1.7   | 1.7  | 0     | 0    | 0 |
| IPR019357      | 1.19  | 1.19 | 0     | 0    | 0 |
| PF06274        | 1.1   | 0    | 1.1   | 0    | 0 |
| PD053407       | 1     | 0    | 1     | 0    | 0 |
| PTHR12873      | 1.09  | 1.14 | 1     | 0    | 0 |
| IPR016800      | 1     | 0    | 0     | 1    | 0 |
| IPR016803      | 2     | 2    | 0     | 0    | 0 |
| IPR016802      | 2     | 2    | 0     | 0    | 0 |
| IPR005232      | 1     | 0    | 1     | 0    | 0 |
| IPR009794      | 1.09  | 0    | 1.09  | 0    | 0 |
| IPR009797      | 1.41  | 0    | 1.41  | 0    | 0 |
| IPR009796      | 2     | 0    | 2     | 0    | 0 |
| IPR009790      | 3.1   | 3.1  | 0     | 0    | 0 |
| PTHR19242:SF91 | 1     | 0    | 1     | 0    | 0 |
| PD037531       | 1.05  | 0    | 1.06  | 1    | 0 |
| PTHR16742:SF2  | 1     | 1    | 0     | 0    | 0 |
| IPR009423      | 1.12  | 1.12 | 0     | 0    | 0 |
| IPR009422      | 1.38  | 1.38 | 0     | 0    | 0 |
| IPR009420      | 1.05  | 0    | 1.05  | 0    | 0 |
| PTHR16703:SF1  | 1.6   | 1.6  | 0     | 0    | 0 |
| IPR014189      | 1.09  | 1.5  | 1     | 0    | 0 |
| IPR006958      | 1.1   | 1.1  | 0     | 0    | 0 |
| IPR006959      | 10.67 | 0    | 10.67 | 0    | 0 |
| IPR006952      | 2.5   | 2.5  | 0     | 0    | 0 |
| PD140898       | 2     | 2    | 0     | 0    | 0 |
| PTHR21737:SF3  | 1.22  | 1.22 | 0     | 0    | 0 |
| IPR010751      | 1.32  | 1    | 1.33  | 0    | 0 |
| PTHR15118      | 2.67  | 2.67 | 0     | 0    | 0 |
| PTHR12463      | 1.33  | 1.33 | 0     | 0    | 0 |
| PTHR12460      | 1.5   | 1.5  | 0     | 0    | 0 |
| PTHR11527:SF15 | 1     | 1    | 1     | 1    | 0 |
| PTHR15137:SF8  | 1     | 1    | 0     | 0    | 0 |
| PTHR11246:SF5  | 1.21  | 1.21 | 0     | 0    | 0 |
| PTHR11246:SF3  | 1.14  | 1.14 | 0     | 0    | 0 |
| IPR019618      | 4.88  | 0    | 4.88  | 0    | 0 |
| IPR007252      | 1.93  | 1.93 | 0     | 0    | 0 |
| IPR007251      | 1.46  | 1.73 | 1.42  | 0    | 0 |
| IPR020955      | 1.05  | 0    | 1.05  | 0    | 0 |
| IPR020950      | 3.42  | 3.42 | 0     | 0    | 0 |
| PD349947       | 1.4   | 1.4  | 0     | 0    | 0 |
| IPR020378      | 1.02  | 1    | 1.02  | 1    | 0 |
| TIGR00327      | 1     | 1    | 0     | 1    | 0 |
| PTHR19134:SF29 | 1.33  | 1.33 | 0     | 0    | 0 |
| IPR015064      | 1.04  | 0    | 1.04  | 0    | 0 |
| IPR019117      | 1.07  | 0    | 1.02  | 1.21 | 0 |
| PTHR21082:SF1  | 1.18  | 1.18 | 0     | 0    | 0 |
| PTHR13578:SF12 | 1.14  | 1.14 | 0     | 0    | 0 |

|                |      |      |       |      |   |
|----------------|------|------|-------|------|---|
| PTHR13578:SF13 | 1.2  | 1.2  | 0     | 0    | 0 |
| IPR021932      | 1    | 0    | 1     | 0    | 0 |
| IPR021937      | 4.45 | 1    | 4.8   | 0    | 0 |
| IPR021936      | 1    | 0    | 1     | 0    | 0 |
| PF09993        | 1.07 | 0    | 1.07  | 0    | 0 |
| IPR018643      | 1.01 | 0    | 1.01  | 0    | 0 |
| IPR018645      | 1.38 | 0    | 0     | 1.38 | 0 |
| IPR018644      | 1.15 | 0    | 1.15  | 1.17 | 0 |
| IPR018648      | 1.02 | 1    | 1.02  | 0    | 0 |
| IPR009229      | 1    | 0    | 1     | 0    | 0 |
| IPR009228      | 1.3  | 1    | 1.3   | 0    | 0 |
| IPR018390      | 1    | 0    | 1     | 0    | 0 |
| IPR009918      | 1.02 | 0    | 1.02  | 0    | 0 |
| IPR009916      | 1.54 | 0    | 1.54  | 0    | 0 |
| IPR009914      | 1.12 | 1.12 | 0     | 0    | 0 |
| IPR009910      | 1.87 | 0    | 1.87  | 0    | 0 |
| IPR017169      | 1.29 | 1.29 | 0     | 0    | 0 |
| IPR010220      | 1.75 | 0    | 1.75  | 0    | 0 |
| PTHR11521:SF1  | 1.33 | 1.33 | 0     | 0    | 0 |
| PF09622        | 1.03 | 0    | 1.04  | 1    | 0 |
| IPR019250      | 1    | 0    | 1     | 1    | 0 |
| IPR019253      | 1.06 | 0    | 1.06  | 0    | 0 |
| IPR008634      | 1.14 | 0    | 1.12  | 1.25 | 0 |
| IPR008633      | 1.17 | 0    | 1     | 1.25 | 0 |
| IPR005002      | 1.32 | 1.36 | 1     | 0    | 0 |
| PF02090        | 1    | 0    | 1     | 0    | 0 |
| PTHR12899      | 1.06 | 1.06 | 0     | 0    | 0 |
| IPR011630      | 1.64 | 0    | 1.64  | 0    | 0 |
| PTHR22428      | 2.5  | 2.5  | 0     | 0    | 0 |
| PTHR22425      | 2.75 | 2.75 | 0     | 0    | 0 |
| PTHR22424      | 1.36 | 1.36 | 0     | 0    | 0 |
| PTHR22420      | 1.5  | 1.5  | 0     | 0    | 0 |
| PTHR21198      | 1    | 0    | 1     | 0    | 0 |
| PTHR21195      | 2.17 | 2.17 | 0     | 0    | 0 |
| TIGR02132      | 1    | 0    | 1     | 0    | 0 |
| IPR006008      | 1.09 | 1    | 1.09  | 0    | 0 |
| IPR007754      | 1.77 | 1.77 | 0     | 0    | 0 |
| IPR007752      | 36   | 1    | 44.75 | 0    | 0 |
| MF_00039       | 1    | 0    | 0     | 1    | 0 |
| PD191663       | 1    | 0    | 1     | 0    | 0 |
| IPR000764      | 1    | 1    | 1     | 0    | 0 |
| IPR000769      | 1.2  | 1    | 1.22  | 0    | 0 |
| IPR013446      | 1    | 0    | 1     | 0    | 0 |
| IPR012711      | 1.17 | 0    | 1.17  | 0    | 0 |
| PF12191        | 1    | 1    | 0     | 0    | 0 |
| IPR021011      | 1    | 0    | 1     | 0    | 0 |
| IPR019096      | 1.38 | 0    | 1.38  | 0    | 0 |
| IPR019094      | 1    | 0    | 1     | 0    | 0 |
| PTHR13559      | 1.24 | 1.24 | 0     | 0    | 0 |
| PTHR13557      | 1.11 | 1.11 | 0     | 0    | 0 |
| IPR015157      | 1.31 | 1.31 | 0     | 0    | 0 |
| IPR022090      | 1    | 0    | 1     | 0    | 0 |
| IPR010522      | 1.1  | 0    | 1.1   | 0    | 0 |
| PF05309        | 1.57 | 0    | 1.57  | 0    | 0 |
| PTHR11953      | 1    | 1    | 0     | 1    | 0 |
| IPR011431      | 1    | 1    | 0     | 0    | 0 |
| IPR011435      | 2.17 | 0    | 2.17  | 2    | 0 |
| IPR011437      | 1.93 | 0    | 1.93  | 0    | 0 |
| IPR011438      | 2.1  | 0    | 2.1   | 0    | 0 |
| IPR014603      | 1.27 | 0    | 1.27  | 0    | 0 |
| IPR010386      | 1.06 | 0    | 1.06  | 0    | 0 |
| IPR010387      | 1.12 | 0    | 1.12  | 1.25 | 0 |
| IPR013875      | 1    | 1    | 0     | 0    | 0 |
| IPR003179      | 2.47 | 0    | 0     | 2.47 | 0 |
| IPR003178      | 1.24 | 0    | 0     | 1.24 | 0 |
| IPR003177      | 2.91 | 2.91 | 0     | 0    | 0 |
| IPR016606      | 3.33 | 3.33 | 0     | 0    | 0 |
| IPR016605      | 2.5  | 2.5  | 0     | 0    | 0 |
| IPR016602      | 1.13 | 0    | 1.15  | 1    | 0 |

|                |       |       |       |      |   |
|----------------|-------|-------|-------|------|---|
| IPR016601      | 1     | 0     | 1     | 0    | 0 |
| IPR012837      | 1     | 0     | 1     | 0    | 0 |
| PF10831        | 1     | 0     | 1     | 0    | 0 |
| PF10833        | 1     | 0     | 1     | 0    | 0 |
| PF10832        | 1     | 0     | 1     | 0    | 0 |
| PF10834        | 1     | 0     | 1     | 0    | 0 |
| PTHR12097      | 1.33  | 1.33  | 0     | 0    | 0 |
| PTHR10628:SF7  | 2.14  | 2.14  | 0     | 0    | 0 |
| IPR021621      | 1     | 0     | 1     | 0    | 0 |
| PF11877        | 1     | 0     | 1     | 0    | 0 |
| PF02114        | 2.19  | 2.19  | 0     | 0    | 0 |
| IPR020520      | 1     | 1     | 0     | 0    | 0 |
| IPR020525      | 1     | 1     | 1     | 0    | 0 |
| IPR020524      | 1.57  | 1.57  | 0     | 0    | 0 |
| PF05462        | 1.33  | 1.33  | 0     | 0    | 0 |
| PF05468        | 1.27  | 0     | 1.27  | 0    | 0 |
| TIGR03401      | 1     | 1     | 0     | 0    | 0 |
| PTHR23147      | 1.27  | 1.27  | 0     | 0    | 0 |
| TIGR01295      | 1     | 0     | 1     | 0    | 0 |
| PD178468       | 1.75  | 1.75  | 0     | 0    | 0 |
| TIGR02750      | 1.43  | 0     | 1.43  | 0    | 0 |
| PTHR21446:SF2  | 1.75  | 1.75  | 0     | 0    | 0 |
| TIGR01128      | 1     | 0     | 1     | 0    | 0 |
| PTHR21544      | 1.14  | 1.14  | 0     | 0    | 0 |
| IPR009472      | 1.33  | 1.12  | 1.37  | 0    | 0 |
| IPR022253      | 1     | 0     | 1     | 0    | 0 |
| PD040491       | 1     | 0     | 1     | 0    | 0 |
| IPR009476      | 1.27  | 0     | 1.28  | 1    | 0 |
| TIGR03185      | 1.07  | 0     | 1.08  | 1    | 0 |
| PTHR22909:SF4  | 1.6   | 1.6   | 0     | 0    | 0 |
| PTHR22909:SF5  | 1.27  | 1.27  | 0     | 0    | 0 |
| IPR006631      | 23.33 | 23.33 | 0     | 0    | 0 |
| MF_01596       | 1     | 0     | 1     | 0    | 0 |
| IPR003375      | 1.26  | 2     | 1.09  | 0    | 0 |
| PTHR19410:SF85 | 1.12  | 1.25  | 1.08  | 0    | 0 |
| IPR007278      | 13.94 | 0     | 13.94 | 0    | 0 |
| IPR007277      | 1.2   | 1.2   | 0     | 0    | 0 |
| PF07638        | 2.06  | 0     | 2.06  | 0    | 0 |
| IPR004721      | 1     | 1     | 1     | 0    | 0 |
| IPR009713      | 1.29  | 0     | 1.29  | 0    | 0 |
| IPR001260      | 1.05  | 1.19  | 1.03  | 0    | 0 |
| IPR021221      | 1.14  | 0     | 1.14  | 0    | 0 |
| IPR021220      | 1.53  | 0     | 1.53  | 0    | 0 |
| PTHR12295:SF12 | 3.2   | 3.2   | 0     | 0    | 0 |
| IPR018482      | 1.71  | 1.71  | 0     | 0    | 0 |
| PTHR13058:SF5  | 1     | 1     | 0     | 0    | 0 |
| PF12206        | 1     | 0     | 1     | 0    | 0 |
| IPR019681      | 1.03  | 0     | 1.03  | 0    | 0 |
| IPR019686      | 1.05  | 0     | 1.05  | 0    | 0 |
| IPR019687      | 1     | 0     | 1     | 0    | 0 |
| PTHR10924      | 1.44  | 1.44  | 0     | 0    | 0 |
| IPR011088      | 1     | 0     | 1     | 0    | 0 |
| PTHR13743      | 1     | 1     | 0     | 0    | 0 |
| IPR002765      | 1.3   | 1     | 1.32  | 1.24 | 0 |
| IPR002760      | 1.64  | 0     | 1     | 1.78 | 0 |
| IPR002763      | 1.41  | 1     | 1.39  | 1.72 | 0 |
| PTHR10366:SF3  | 1     | 1     | 1     | 0    | 0 |
| PTHR10210      | 1.09  | 1.12  | 1     | 0    | 0 |
| PTHR15197      | 1.73  | 1.73  | 0     | 0    | 0 |
| PTHR15199      | 1.8   | 1.8   | 0     | 0    | 0 |
| PD175181       | 1     | 0     | 1     | 0    | 0 |
| IPR016418      | 1.33  | 0     | 1.33  | 0    | 0 |
| IPR016419      | 1     | 0     | 1     | 0    | 0 |
| IPR007039      | 2.22  | 0     | 2.22  | 0    | 0 |
| PTHR13843:SF5  | 1.25  | 1.25  | 0     | 0    | 0 |
| PTHR13843:SF1  | 1.6   | 1.75  | 1     | 0    | 0 |
| PTHR21831      | 1     | 1     | 0     | 0    | 0 |
| PTHR12381:SF3  | 1.17  | 1.17  | 0     | 0    | 0 |
| IPR020488      | 1     | 0     | 1     | 0    | 0 |

|                |       |      |       |      |   |
|----------------|-------|------|-------|------|---|
| IPR020489      | 1     | 0    | 1     | 0    | 0 |
| IPR020485      | 1     | 1    | 0     | 0    | 0 |
| IPR020487      | 1.21  | 0    | 1.21  | 0    | 0 |
| IPR020483      | 1.02  | 0    | 1.02  | 0    | 0 |
| TIGR01708      | 1     | 0    | 1     | 0    | 0 |
| PTHR20878      | 1.67  | 1.67 | 0     | 0    | 0 |
| PTHR20879      | 1     | 1    | 0     | 0    | 0 |
| PTHR20875      | 1     | 1    | 0     | 0    | 0 |
| PTHR20877      | 1     | 1    | 0     | 0    | 0 |
| IPR021429      | 1.82  | 1.82 | 0     | 0    | 0 |
| IPR021427      | 6.8   | 0    | 6.8   | 0    | 0 |
| IPR021426      | 1.02  | 0    | 1.02  | 0    | 0 |
| IPR021420      | 1.1   | 1.5  | 1     | 0    | 0 |
| TIGR02547      | 1     | 0    | 1     | 0    | 0 |
| PTHR23271:SF1  | 1.33  | 1.33 | 0     | 0    | 0 |
| IPR000989      | 1.24  | 0    | 1.24  | 0    | 0 |
| PD339107       | 1.1   | 1    | 1.11  | 0    | 0 |
| IPR009996      | 1.03  | 0    | 1.03  | 0    | 0 |
| IPR009995      | 1     | 0    | 0     | 1    | 0 |
| IPR009993      | 1.01  | 0    | 1.01  | 0    | 0 |
| IPR009991      | 1.4   | 1.4  | 0     | 0    | 0 |
| IPR009999      | 1.58  | 0    | 1.58  | 0    | 0 |
| IPR009998      | 1.09  | 0    | 1.09  | 0    | 0 |
| IPR006774      | 1     | 1    | 0     | 0    | 0 |
| IPR007845      | 1.08  | 0    | 1.08  | 0    | 0 |
| IPR007841      | 1.05  | 0    | 1.01  | 1.2  | 0 |
| PF09135        | 1     | 1    | 0     | 0    | 0 |
| IPR007595      | 12.53 | 0    | 12.53 | 0    | 0 |
| IPR010807      | 1.04  | 0    | 1.04  | 0    | 0 |
| IPR007334      | 1.02  | 0    | 1.02  | 0    | 0 |
| IPR007337      | 1.48  | 1    | 1.48  | 0    | 0 |
| IPR007336      | 1.03  | 0    | 1.03  | 0    | 0 |
| IPR001656      | 1.13  | 1.34 | 1.07  | 1.11 | 0 |
| IPR001651      | 2.18  | 2.18 | 0     | 0    | 0 |
| IPR001653      | 2.11  | 2.25 | 2.11  | 2    | 0 |
| IPR004684      | 1.27  | 0    | 1.27  | 0    | 0 |
| IPR004685      | 1.66  | 0    | 1.66  | 0    | 0 |
| PTHR21426:SF2  | 1.67  | 1.67 | 0     | 0    | 0 |
| IPR016922      | 1.04  | 0    | 1.04  | 0    | 0 |
| IPR016923      | 1     | 0    | 1     | 0    | 0 |
| IPR016921      | 1     | 0    | 1     | 0    | 0 |
| IPR016924      | 1.05  | 0    | 1.05  | 0    | 0 |
| IPR005378      | 1.66  | 1.66 | 0     | 0    | 0 |
| IPR002685      | 4.27  | 4.34 | 2     | 0    | 0 |
| IPR002682      | 1.14  | 1.75 | 1     | 0    | 0 |
| IPR002680      | 1.92  | 2.44 | 1.09  | 0    | 0 |
| IPR018563      | 1     | 0    | 1     | 0    | 0 |
| PTHR16524      | 1.75  | 1.75 | 0     | 0    | 0 |
| IPR009507      | 1.02  | 1    | 1.02  | 0    | 0 |
| IPR005080      | 1.03  | 0    | 1.03  | 0    | 0 |
| IPR009502      | 1.05  | 0    | 1.05  | 0    | 0 |
| PTHR19446:SF98 | 7.67  | 7.67 | 0     | 0    | 0 |
| PTHR13466      | 1     | 1    | 0     | 0    | 0 |
| PF12070        | 1.97  | 1.97 | 0     | 0    | 0 |
| IPR009665      | 1.48  | 0    | 1.48  | 0    | 0 |
| PF04944        | 1.16  | 0    | 1.16  | 0    | 0 |
| PTHR10432:SF56 | 1.08  | 1.1  | 1     | 0    | 0 |
| PTHR10432:SF51 | 1.2   | 1.2  | 0     | 0    | 0 |
| TIGR01395      | 1.33  | 0    | 1.33  | 0    | 0 |
| IPR010495      | 1.2   | 0    | 1.2   | 0    | 0 |
| IPR010498      | 1     | 1    | 1     | 0    | 0 |
| IPR021579      | 1     | 0    | 1     | 0    | 0 |
| IPR010144      | 1.08  | 0    | 1.08  | 1    | 0 |
| IPR010148      | 1.09  | 0    | 1.1   | 1    | 0 |
| IPR010149      | 1.02  | 0    | 1.02  | 1    | 0 |
| PTHR14781      | 1.77  | 1.77 | 0     | 0    | 0 |
| IPR009780      | 1.06  | 0    | 1.06  | 0    | 0 |
| PTHR21114      | 1.6   | 1.6  | 0     | 0    | 0 |
| PTHR21115      | 3.14  | 3.14 | 0     | 0    | 0 |



|                |      |      |      |      |   |
|----------------|------|------|------|------|---|
| PTHR21111      | 1    | 1    | 0    | 0    | 0 |
| PD580032       | 1    | 0    | 1    | 0    | 0 |
| PD736990       | 2    | 2    | 0    | 0    | 0 |
| PTHR10663:SF13 | 1    | 1    | 0    | 0    | 0 |
| PF07269        | 1    | 0    | 1    | 0    | 0 |
| PTHR13902:SF6  | 2.67 | 2.67 | 0    | 0    | 0 |
| PTHR20931      | 1.91 | 1.91 | 0    | 0    | 0 |
| PTHR20933      | 1    | 1    | 0    | 0    | 0 |
| IPRO20144      | 1    | 0    | 1    | 0    | 0 |
| IPRO20146      | 1.05 | 0    | 1.05 | 0    | 0 |
| IPRO20140      | 1    | 0    | 1    | 0    | 0 |
| IPRO20143      | 1    | 0    | 1    | 0    | 0 |
| IPRO01414      | 1.67 | 1.67 | 0    | 0    | 0 |
| IPRO19016      | 1.5  | 0    | 1.17 | 1.6  | 0 |
| PD205440       | 1    | 0    | 1    | 0    | 0 |
| PTHR22307      | 1.85 | 1.85 | 0    | 0    | 0 |
| PTHR21656      | 2.74 | 2.74 | 0    | 0    | 0 |
| PTHR21655      | 1.5  | 1.5  | 0    | 0    | 0 |
| PTHR21651      | 1.67 | 1.67 | 0    | 0    | 0 |
| IPRO18760      | 1.07 | 0    | 1.07 | 1    | 0 |
| IPRO18766      | 1.61 | 0    | 1.66 | 1    | 0 |
| PTHR18958:SF13 | 1.67 | 1.67 | 0    | 0    | 0 |
| IPRO15221      | 1.11 | 1.13 | 0    | 1    | 0 |
| PTHR22611:SF4  | 1.08 | 1.08 | 0    | 0    | 0 |
| PD031037       | 1.1  | 0    | 1.1  | 0    | 0 |
| IPRO16667      | 1    | 0    | 1    | 0    | 0 |
| IPRO05642      | 1.23 | 0    | 1.27 | 1.04 | 0 |
| IPRO10306      | 1.04 | 0    | 1.04 | 1    | 0 |
| PTHR13768:SF2  | 1.5  | 1.5  | 0    | 0    | 0 |
| PTHR13768:SF5  | 1.06 | 1.06 | 0    | 0    | 0 |
| IPRO02802      | 1    | 0    | 1    | 1    | 0 |
| IPRO02803      | 1.03 | 0    | 1.04 | 1.03 | 0 |
| PTHR14403:SF2  | 1.67 | 1.67 | 0    | 0    | 0 |
| IPRO00402      | 5.13 | 5.13 | 0    | 0    | 0 |
| PTHR15544      | 1.6  | 1.6  | 0    | 0    | 0 |
| PTHR19240      | 1    | 1    | 0    | 0    | 0 |
| PF10855        | 1    | 0    | 1    | 0    | 0 |
| TIGR01975      | 1    | 0    | 1    | 0    | 0 |
| PTHR16220      | 1.1  | 1.1  | 0    | 0    | 0 |
| IPRO09338      | 2.15 | 0    | 2.15 | 0    | 0 |
| IPRO09335      | 1.03 | 0    | 1.03 | 1    | 0 |
| IPRO09334      | 1.11 | 1    | 1.11 | 0    | 0 |
| IPRO09333      | 1.69 | 0    | 1.69 | 0    | 0 |
| IPRO09331      | 2.06 | 0    | 2.06 | 0    | 0 |
| IPRO11179      | 1    | 0    | 1    | 1    | 0 |
| PF11361        | 1.36 | 0    | 1.36 | 0    | 0 |
| TIGR01213      | 1    | 0    | 0    | 1    | 0 |
| PTHR14332      | 6.83 | 6.83 | 0    | 0    | 0 |
| PTHR21326      | 2.07 | 2.07 | 0    | 0    | 0 |
| TIGR03101      | 1    | 0    | 1    | 0    | 0 |
| TIGR03100      | 1    | 0    | 1    | 0    | 0 |
| TIGR02270      | 1.67 | 0    | 1.67 | 0    | 0 |
| TIGR02274      | 1    | 0    | 1    | 0    | 0 |
| IPRO09348      | 1.13 | 1.13 | 0    | 0    | 0 |
| IPRO07149      | 1.46 | 1.46 | 0    | 0    | 0 |
| IPRO07144      | 1.18 | 1.18 | 0    | 0    | 0 |
| IPRO07143      | 1.21 | 1.21 | 0    | 0    | 0 |
| IPRO07140      | 2.17 | 0    | 2.16 | 4    | 0 |
| IPRO21116      | 4.36 | 4.36 | 0    | 0    | 0 |
| IPRO21111      | 1.11 | 0    | 1.11 | 0    | 0 |
| PTHR22539      | 1.15 | 1.15 | 0    | 0    | 0 |
| PTHR22533      | 1    | 1    | 0    | 0    | 0 |
| IPRO19603      | 1    | 1    | 0    | 0    | 0 |
| IPRO19600      | 1.04 | 0    | 1.04 | 0    | 0 |
| IPRO19608      | 1    | 0    | 1    | 0    | 0 |
| IPRO12589      | 1.33 | 1.33 | 0    | 0    | 0 |
| PTHR16797      | 1.33 | 1.33 | 0    | 0    | 0 |
| IPRO15058      | 1.09 | 0    | 1.09 | 0    | 0 |
| IPRO21809      | 1.05 | 0    | 1.05 | 0    | 0 |

|                |      |      |      |      |   |
|----------------|------|------|------|------|---|
| IPR021806      | 1.06 | 0    | 1.06 | 0    | 0 |
| IPR021804      | 1.06 | 1    | 1.06 | 0    | 0 |
| IPR021803      | 1.03 | 0    | 1.03 | 0    | 0 |
| IPR021801      | 2.17 | 0    | 2.17 | 0    | 0 |
| IPR008886      | 1.44 | 0    | 1.44 | 1    | 0 |
| IPR002101      | 3    | 3    | 0    | 0    | 0 |
| PD458455       | 1    | 0    | 1    | 0    | 0 |
| PD020932       | 1.75 | 1.75 | 0    | 0    | 0 |
| PTHR15660      | 1    | 1    | 0    | 0    | 0 |
| IPR007423      | 1.27 | 1    | 1.27 | 0    | 0 |
| IPR007422      | 1.04 | 0    | 1.04 | 0    | 0 |
| IPR007427      | 1.11 | 1    | 1.12 | 1    | 0 |
| IPR016768      | 1.02 | 0    | 1.02 | 0    | 0 |
| IPR016769      | 1.6  | 0    | 1.6  | 0    | 0 |
| IPR016760      | 1    | 0    | 0    | 1    | 0 |
| IPR016762      | 1    | 0    | 0    | 1    | 0 |
| IPR016764      | 1    | 0    | 0    | 1    | 0 |
| IPR016767      | 1    | 0    | 1    | 0    | 0 |
| PTHR15361:SF2  | 1.8  | 1.8  | 0    | 0    | 0 |
| PTHR15361:SF1  | 1.8  | 1.8  | 0    | 0    | 0 |
| PF04465        | 1.24 | 0    | 1.26 | 1.12 | 0 |
| PF04462        | 1.04 | 0    | 1.05 | 1    | 0 |
| IPR013294      | 1.5  | 1.5  | 0    | 0    | 0 |
| IPR016498      | 1    | 0    | 1    | 0    | 0 |
| IPR016499      | 1    | 0    | 1    | 0    | 0 |
| IPR004445      | 1.12 | 1    | 1.13 | 1    | 0 |
| IPR014570      | 1    | 0    | 1    | 0    | 0 |
| PTHR10357:SF24 | 1    | 1    | 1    | 0    | 0 |
| PF05783        | 1.77 | 1.77 | 0    | 0    | 0 |
| PF05786        | 1.77 | 1.77 | 0    | 0    | 0 |
| PTHR14270      | 1.09 | 1.09 | 0    | 0    | 0 |
| IPR014592      | 1    | 0    | 1    | 0    | 0 |
| PTHR12816:SF5  | 1    | 1    | 0    | 0    | 0 |
| PTHR22739      | 1.91 | 1.91 | 0    | 0    | 0 |
| TIGR00661      | 1    | 0    | 1    | 0    | 0 |
| IPR022110      | 5.8  | 5.8  | 0    | 0    | 0 |
| PTHR15268:SF4  | 2.33 | 2.33 | 0    | 0    | 0 |
| PTHR21283      | 1.5  | 1.5  | 0    | 0    | 0 |
| IPR009272      | 2.36 | 0    | 1    | 2.88 | 0 |
| TIGR03318      | 1    | 0    | 1    | 0    | 0 |
| IPR009276      | 1.77 | 0    | 1.78 | 1    | 0 |
| IPR009274      | 1.32 | 0    | 1.32 | 0    | 0 |
| PTHR19237:SF4  | 2.25 | 2.25 | 0    | 0    | 0 |
| PTHR12932:SF10 | 1    | 1    | 0    | 0    | 0 |
| IPR010886      | 1.23 | 0    | 1.23 | 0    | 0 |
| IPR010888      | 1.05 | 0    | 1.05 | 0    | 0 |
| PD024016       | 1.04 | 0    | 1.04 | 0    | 0 |
| PF06330        | 2.9  | 2.9  | 0    | 0    | 0 |
| IPR012657      | 1.25 | 0    | 1.25 | 0    | 0 |
| IPR012620      | 1    | 0    | 1    | 0    | 0 |
| IPR001384      | 1.92 | 2.16 | 1    | 0    | 0 |
| IPR021308      | 1.23 | 0    | 1.23 | 0    | 0 |
| IPR021306      | 1.01 | 0    | 1.01 | 0    | 0 |
| IPR021307      | 1.17 | 0    | 1.17 | 0    | 0 |
| IPR021300      | 1.23 | 0    | 1.23 | 0    | 0 |
| IPR021302      | 1.04 | 0    | 1.04 | 0    | 0 |
| IPR009585      | 2.67 | 0    | 2.67 | 0    | 0 |
| IPR009587      | 1.02 | 0    | 1.02 | 0    | 0 |
| IPR008185      | 3.24 | 4.45 | 1    | 1    | 0 |
| IPR010410      | 6.14 | 6.14 | 0    | 0    | 0 |
| IPR010411      | 1.38 | 0    | 1.38 | 0    | 0 |
| PF05017        | 13.4 | 40   | 6.75 | 0    | 0 |
| IPR014917      | 1.35 | 0    | 1.35 | 0    | 0 |
| IPR014910      | 1.01 | 0    | 1.01 | 0    | 0 |
| IPR014913      | 1    | 0    | 1    | 0    | 0 |
| MF_00788       | 1    | 0    | 0    | 1    | 0 |
| PF11055        | 1    | 1    | 0    | 0    | 0 |
| PF11058        | 1.14 | 0    | 1.14 | 0    | 0 |
| IPR016518      | 1.73 | 1.71 | 1.76 | 1    | 0 |

|                |      |      |      |      |   |
|----------------|------|------|------|------|---|
| PTHR12703      | 1.25 | 1.25 | 0    | 0    | 0 |
| IPR016513      | 1    | 0    | 1    | 0    | 0 |
| IPR016512      | 1    | 0    | 1    | 0    | 0 |
| IPR016511      | 1    | 0    | 1    | 0    | 0 |
| IPR013948      | 1.13 | 1.14 | 1    | 0    | 0 |
| PF10904        | 1    | 0    | 1    | 0    | 0 |
| PF10907        | 1.86 | 0    | 1.86 | 0    | 0 |
| PTHR10967:SF26 | 1    | 1    | 0    | 0    | 0 |
| IPR019404      | 1.11 | 1.11 | 0    | 0    | 0 |
| TIGR01660      | 1.06 | 0    | 1.06 | 1    | 0 |
| TIGR01668      | 1.1  | 0    | 1.1  | 0    | 0 |
| IPR020233      | 1    | 1    | 0    | 0    | 0 |
| IPR020231      | 1    | 0    | 1    | 0    | 0 |
| TIGR00040      | 1    | 1    | 1    | 1    | 0 |
| PD195745       | 1    | 0    | 1    | 0    | 0 |
| TIGR03536      | 1    | 0    | 1    | 0    | 0 |
| TIGR00375      | 1.17 | 0    | 1.17 | 0    | 0 |
| PTHR22385      | 1.14 | 1.14 | 0    | 0    | 0 |
| MF_01191       | 1    | 0    | 1    | 0    | 0 |
| PTHR12778:SF3  | 1.49 | 1.49 | 0    | 0    | 0 |
| PTHR12778:SF2  | 1    | 0    | 1    | 0    | 0 |
| MF_01195       | 1    | 0    | 1    | 0    | 0 |
| IPR021670      | 1    | 0    | 1    | 0    | 0 |
| IPR021671      | 1    | 0    | 1    | 0    | 0 |
| IPR021678      | 1.18 | 0    | 1.18 | 0    | 0 |
| IPR021679      | 1.08 | 0    | 1.08 | 0    | 0 |
| PD026929       | 1    | 0    | 1    | 0    | 0 |
| IPR016595      | 1    | 0    | 1    | 0    | 0 |
| IPR002882      | 1.16 | 1.11 | 1.17 | 1.04 | 0 |
| IPR006707      | 2.45 | 0    | 2.45 | 0    | 0 |
| MF_01681       | 1    | 0    | 1    | 0    | 0 |
| IPR010404      | 1.7  | 1.43 | 1.76 | 0    | 0 |
| IPR000956      | 3.52 | 3.52 | 0    | 0    | 0 |
| IPR003752      | 1.31 | 2    | 1.31 | 1    | 0 |
| PF08745        | 1.04 | 0    | 1    | 1.06 | 0 |
| MF_00088       | 1.03 | 0    | 1.03 | 0    | 0 |
| PF07298        | 1.28 | 1.6  | 1.26 | 0    | 0 |
| IPR013744      | 1.4  | 1.47 | 1    | 0    | 0 |
| IPR013743      | 1.67 | 1.67 | 0    | 0    | 0 |
| IPR008576      | 1.32 | 1.32 | 0    | 0    | 0 |
| IPR008577      | 1    | 0    | 1    | 0    | 0 |
| PD024222       | 1    | 0    | 1    | 0    | 0 |
| IPR000226      | 4.5  | 4.5  | 0    | 0    | 0 |
| IPR021531      | 2.21 | 0    | 2.21 | 0    | 0 |
| IPR008392      | 1.57 | 1.57 | 0    | 0    | 0 |
| PTHR12981      | 1.38 | 1.38 | 0    | 0    | 0 |
| PTHR21694:SF2  | 2.92 | 2.92 | 0    | 0    | 0 |
| PTHR12984      | 1.09 | 1.09 | 0    | 0    | 0 |
| PTHR12988      | 1.25 | 1.25 | 0    | 0    | 0 |
| IPR009621      | 1.17 | 1.17 | 0    | 0    | 0 |
| IPR009620      | 3.52 | 0    | 3.62 | 1    | 0 |
| IPR009623      | 1    | 0    | 1    | 0    | 0 |
| IPR009622      | 1.12 | 1.12 | 0    | 0    | 0 |
| IPR009625      | 1    | 0    | 0    | 1    | 0 |
| IPR009624      | 1.04 | 0    | 1.04 | 0    | 0 |
| IPR009627      | 1.02 | 0    | 1.02 | 1    | 0 |
| PD037484       | 1.18 | 0    | 1.18 | 0    | 0 |
| PTHR13586      | 2    | 2    | 0    | 0    | 0 |
| PTHR13632      | 1.13 | 1.13 | 0    | 0    | 0 |
| PTHR13633      | 1.12 | 1.12 | 0    | 0    | 0 |
| PTHR13634      | 1    | 1    | 0    | 0    | 0 |
| PTHR14005      | 1.12 | 1.12 | 0    | 0    | 0 |
| IPR010595      | 1.2  | 0    | 1.2  | 0    | 0 |
| IPR010590      | 1.05 | 0    | 1.05 | 0    | 0 |
| IPR010592      | 1    | 0    | 1    | 0    | 0 |
| IPR010626      | 3.07 | 2    | 3.09 | 0    | 0 |
| IPR007919      | 1.43 | 1.43 | 0    | 0    | 0 |
| PTHR15354      | 2    | 2    | 0    | 0    | 0 |
| IPR007911      | 1.28 | 0    | 1.28 | 0    | 0 |

|                |       |       |      |   |   |
|----------------|-------|-------|------|---|---|
| IPR007910      | 3.67  | 0     | 3.67 | 0 | 0 |
| IPR007914      | 1.27  | 1.27  | 0    | 0 | 0 |
| PTHR12516      | 1.21  | 1.21  | 0    | 0 | 0 |
| PTHR12513      | 3.17  | 3.17  | 0    | 0 | 0 |
| PTHR12519      | 3.54  | 3.54  | 0    | 0 | 0 |
| PTHR19306:SF1  | 1.33  | 1.33  | 0    | 0 | 0 |
| PTHR21908      | 1     | 1     | 0    | 0 | 0 |
| PD338207       | 1.27  | 0     | 1.27 | 0 | 0 |
| PTHR23242:SF3  | 1.05  | 1.06  | 1    | 0 | 0 |
| IPR020066      | 2.5   | 2.5   | 0    | 0 | 0 |
| TIGR02949      | 1     | 0     | 1    | 0 | 0 |
| PTHR15128      | 1.67  | 1.67  | 0    | 0 | 0 |
| IPR021730      | 1.16  | 0     | 1.16 | 0 | 0 |
| IPR021732      | 1     | 1     | 1    | 0 | 0 |
| IPR021734      | 2.34  | 0     | 2.38 | 2 | 0 |
| IPR021737      | 1.02  | 0     | 1.02 | 1 | 0 |
| IPR021736      | 1     | 0     | 1    | 0 | 0 |
| IPR021738      | 1.21  | 0     | 1.21 | 0 | 0 |
| PTHR22027      | 1.25  | 1.25  | 0    | 0 | 0 |
| PTHR22028      | 1.24  | 1.24  | 0    | 0 | 0 |
| IPR021889      | 1.24  | 1     | 1.35 | 0 | 0 |
| IPR021888      | 1     | 0     | 1    | 0 | 0 |
| IPR008802      | 3.29  | 3.29  | 0    | 0 | 0 |
| IPR008800      | 1     | 0     | 1    | 0 | 0 |
| PTHR21041      | 1     | 1     | 0    | 0 | 0 |
| PTHR21048      | 1.75  | 1.75  | 0    | 0 | 0 |
| PTHR16267:SF1  | 1.64  | 1.64  | 0    | 0 | 0 |
| PTHR11738:SF13 | 1.25  | 1.25  | 0    | 0 | 0 |
| PTHR21084      | 1.21  | 1.21  | 0    | 0 | 0 |
| IPR008662      | 1.88  | 1.88  | 0    | 0 | 0 |
| IPR005984      | 1.12  | 1.12  | 0    | 0 | 0 |
| IPR009868      | 1     | 0     | 1    | 0 | 0 |
| IPR009863      | 1     | 0     | 1    | 0 | 0 |
| IPR009861      | 1.17  | 1.17  | 0    | 0 | 0 |
| IPR009867      | 1.01  | 0     | 1.01 | 0 | 0 |
| IPR010027      | 2.04  | 0     | 2.04 | 0 | 0 |
| IPR010026      | 1.07  | 0     | 1.07 | 0 | 0 |
| IPR010023      | 1.23  | 0     | 1.23 | 0 | 0 |
| IPR010022      | 1.31  | 0     | 1.31 | 0 | 0 |
| PTHR22543      | 1.57  | 1.57  | 0    | 0 | 0 |
| PTHR10943:SF1  | 1     | 1     | 0    | 0 | 0 |
| IPR006518      | 46.25 | 61.33 | 1    | 0 | 0 |
| IPR006513      | 1.23  | 1     | 1.23 | 0 | 0 |
| IPR006516      | 2.07  | 0     | 2.07 | 0 | 0 |
| PF09621        | 1     | 0     | 1    | 0 | 0 |
| MF_01525       | 1     | 0     | 1    | 0 | 0 |
| IPR017278      | 1     | 1     | 0    | 0 | 0 |
| IPR017275      | 1     | 0     | 1    | 0 | 0 |
| IPR007292      | 1     | 1     | 0    | 0 | 0 |
| PTHR11260:SF6  | 1     | 1     | 1    | 0 | 0 |
| PF07159        | 1.89  | 1.89  | 0    | 0 | 0 |
| IPR001890      | 1.53  | 29.25 | 1.01 | 1 | 0 |
| IPR004116      | 2.57  | 2.57  | 0    | 0 | 0 |
| IPR016895      | 1     | 0     | 1    | 0 | 0 |
| PTHR12820      | 1     | 1     | 0    | 0 | 0 |
| PTHR12827      | 1.15  | 1.15  | 0    | 0 | 0 |
| PF10798        | 1.44  | 0     | 1.44 | 0 | 0 |
| IPR014593      | 1     | 0     | 1    | 0 | 0 |
| IPR014201      | 1.02  | 0     | 1.02 | 0 | 0 |
| PTHR21019      | 1.09  | 1.09  | 0    | 0 | 0 |
| PTHR21202      | 1     | 1     | 0    | 0 | 0 |
| PTHR21203      | 1.07  | 1.07  | 0    | 0 | 0 |
| TIGR02046      | 1.03  | 0     | 1.03 | 0 | 0 |
| IPR000074      | 5.94  | 5.75  | 6.05 | 4 | 0 |
| IPR013205      | 1     | 0     | 1    | 0 | 0 |
| IPR021386      | 1.5   | 1.5   | 0    | 0 | 0 |
| IPR021380      | 1     | 0     | 1    | 0 | 0 |
| IPR021381      | 2     | 0     | 2    | 0 | 0 |
| IPR021383      | 1.07  | 0     | 1.07 | 0 | 0 |

|               |       |       |      |      |   |
|---------------|-------|-------|------|------|---|
| IPR012565     | 1     | 0     | 1    | 0    | 0 |
| IPR012563     | 1.26  | 0     | 1.26 | 0    | 0 |
| PTHR13312     | 1     | 1     | 0    | 0    | 0 |
| IPR019166     | 1.39  | 1.39  | 0    | 0    | 0 |
| IPR019161     | 1.16  | 1.17  | 1    | 0    | 0 |
| IPR019160     | 1.26  | 1.26  | 0    | 0    | 0 |
| IPR008108     | 1     | 0     | 1    | 0    | 0 |
| IPR021960     | 1.65  | 0     | 1.65 | 0    | 0 |
| IPR018696     | 1     | 0     | 1    | 0    | 0 |
| IPR018694     | 1     | 0     | 0    | 1    | 0 |
| IPR018695     | 1     | 0     | 1    | 0    | 0 |
| IPR018693     | 1.05  | 0     | 1    | 1.06 | 0 |
| IPR018690     | 1.27  | 0     | 1.27 | 0    | 0 |
| IPR018691     | 1.04  | 0     | 1.04 | 0    | 0 |
| IPR018699     | 1.03  | 0     | 1.04 | 1    | 0 |
| IPR005556     | 2.08  | 2.08  | 0    | 0    | 0 |
| IPR005554     | 1.25  | 1.25  | 0    | 0    | 0 |
| IPR014447     | 1     | 0     | 1    | 0    | 0 |
| IPR014448     | 1     | 0     | 1    | 0    | 0 |
| IPR006230     | 1.04  | 0     | 1.04 | 0    | 0 |
| IPR007548     | 1.2   | 0     | 1.14 | 1.33 | 0 |
| IPR007546     | 1.02  | 0     | 1.02 | 0    | 0 |
| PTHR18207     | 3.14  | 3.14  | 0    | 0    | 0 |
| MF_01199      | 1     | 0     | 1    | 0    | 0 |
| IPR014999     | 1.02  | 1     | 1.02 | 0    | 0 |
| IPR014998     | 1.21  | 0     | 1.23 | 1    | 0 |
| IPR014993     | 1.02  | 0     | 1.02 | 0    | 0 |
| PF04585       | 1.66  | 0     | 1.66 | 0    | 0 |
| IPR016599     | 1     | 0     | 1    | 0    | 0 |
| PTHR22443:SF8 | 2.67  | 2.67  | 0    | 0    | 0 |
| IPR000532     | 11.36 | 11.36 | 0    | 0    | 0 |
| IPR004093     | 1.7   | 0     | 1.7  | 0    | 0 |
| PTHR16317     | 1.6   | 1.6   | 0    | 0    | 0 |
| PTHR21136:SF1 | 1.75  | 1.75  | 0    | 0    | 0 |
| IPR009190     | 1     | 0     | 1    | 0    | 0 |
| IPR004329     | 1.07  | 1.29  | 1.07 | 1    | 0 |
| IPR004321     | 1.75  | 1.75  | 0    | 0    | 0 |
| IPR008661     | 6     | 6     | 0    | 0    | 0 |
| IPR004327     | 2.09  | 2.09  | 0    | 0    | 0 |
| IPR004324     | 3.06  | 7.17  | 1    | 0    | 0 |
| PF10619       | 1.04  | 0     | 1.04 | 0    | 0 |
| PTHR12311:SF3 | 1.1   | 1.1   | 0    | 0    | 0 |
| PF05516       | 1.08  | 1.08  | 0    | 0    | 0 |
| PD035714      | 1     | 0     | 1    | 0    | 0 |
| IPR001195     | 3.6   | 3.6   | 0    | 0    | 0 |
| PTHR20947:SF1 | 1.27  | 1.27  | 0    | 0    | 0 |
| PTHR20947:SF2 | 1     | 1     | 0    | 0    | 0 |
| TIGR02665     | 1     | 0     | 1    | 0    | 0 |
| IPR006038     | 6     | 6     | 0    | 0    | 0 |
| IPR007788     | 1.11  | 1.29  | 1.08 | 0    | 0 |
| IPR003207     | 1.11  | 0     | 1.11 | 0    | 0 |
| IPR007783     | 1.41  | 1.41  | 0    | 0    | 0 |
| IPR006783     | 6     | 0     | 4    | 6.57 | 0 |
| IPR006780     | 8.88  | 8.88  | 0    | 0    | 0 |
| PTHR19232:SF2 | 1.4   | 1.4   | 0    | 0    | 0 |
| PTHR19232:SF1 | 1.5   | 1.5   | 0    | 0    | 0 |
| IPR006788     | 7.33  | 7.33  | 0    | 0    | 0 |
| IPR003519     | 1     | 0     | 1    | 0    | 0 |
| IPR012475     | 1.11  | 1.14  | 1    | 0    | 0 |
| IPR012477     | 1     | 0     | 1    | 0    | 0 |
| IPR009782     | 2.17  | 2.17  | 0    | 0    | 0 |
| IPR019732     | 1.08  | 0     | 1.08 | 0    | 0 |
| IPR019733     | 1.06  | 0     | 1.06 | 0    | 0 |
| IPR019730     | 1     | 0     | 1    | 0    | 0 |
| IPR019731     | 1     | 0     | 1    | 0    | 0 |
| IPR008310     | 1     | 0     | 1    | 0    | 0 |
| IPR008316     | 1.42  | 0     | 1.42 | 0    | 0 |
| IPR008317     | 1     | 0     | 1    | 1    | 0 |
| PD608212      | 1     | 0     | 1    | 0    | 0 |

|                |      |      |      |      |   |
|----------------|------|------|------|------|---|
| IPR010510      | 2.33 | 2.33 | 0    | 0    | 0 |
| MF_01012       | 1    | 0    | 1    | 0    | 0 |
| PF05821        | 1.18 | 1.18 | 0    | 0    | 0 |
| PTHR11019      | 1.2  | 1.5  | 1    | 0    | 0 |
| PF11157        | 1    | 0    | 1    | 0    | 0 |
| IPR017382      | 1.25 | 1.25 | 0    | 0    | 0 |
| IPR017384      | 1.3  | 1.3  | 0    | 0    | 0 |
| PTHR12663      | 2    | 2    | 0    | 0    | 0 |
| PTHR14995      | 1.17 | 1.17 | 0    | 0    | 0 |
| IPR016386      | 1    | 0    | 1    | 0    | 0 |
| IPR016387      | 1    | 0    | 1    | 0    | 0 |
| IPR016388      | 1    | 0    | 1    | 0    | 0 |
| PTHR12289:SF9  | 2.17 | 2.17 | 0    | 0    | 0 |
| PTHR23329:SF3  | 1.5  | 1.5  | 0    | 0    | 0 |
| IPR012190      | 1    | 0    | 1    | 0    | 0 |
| IPR003209      | 1.11 | 1    | 1.1  | 1.13 | 0 |
| IPR007785      | 1.21 | 1.21 | 0    | 0    | 0 |
| TIGR03478      | 1.11 | 0    | 1.17 | 1    | 0 |
| TIGR02786      | 1.02 | 0    | 1.02 | 0    | 0 |
| TIGR02780      | 1.62 | 0    | 1.62 | 0    | 0 |
| PTHR13163      | 1.27 | 1.27 | 0    | 0    | 0 |
| PTHR21517      | 1.08 | 1.08 | 0    | 0    | 0 |
| PTHR22904:SF19 | 1.57 | 1.59 | 1    | 0    | 0 |
| IPR022207      | 2.11 | 2.11 | 0    | 0    | 0 |
| PD320073       | 1.67 | 1.67 | 0    | 0    | 0 |
| IPR006591      | 1.13 | 1.16 | 0    | 1    | 0 |
| IPR016431      | 1    | 1    | 1    | 0    | 0 |
| PF07665        | 1.5  | 0    | 1.5  | 0    | 0 |
| IPR007242      | 1.09 | 1.09 | 0    | 0    | 0 |
| MF_00612       | 1    | 0    | 1    | 0    | 0 |
| IPR008433      | 2.14 | 2.14 | 0    | 0    | 0 |
| IPR008431      | 1.5  | 1.5  | 0    | 0    | 0 |
| IPR008435      | 1.18 | 1.18 | 0    | 0    | 0 |
| IPR008439      | 1.91 | 0    | 1.91 | 0    | 0 |
| IPR008438      | 2.89 | 2.89 | 0    | 0    | 0 |
| IPR012397      | 1    | 0    | 1    | 0    | 0 |
| IPR021272      | 1.09 | 0    | 1.09 | 0    | 0 |
| IPR021273      | 1.02 | 0    | 1.02 | 0    | 0 |
| IPR021274      | 1.08 | 0    | 1.08 | 0    | 0 |
| IPR021279      | 1.17 | 1    | 1.17 | 0    | 0 |
| PTHR11662:SF3  | 2.37 | 2.62 | 1    | 0    | 0 |
| PTHR11662:SF4  | 1.25 | 1.25 | 0    | 0    | 0 |
| IPR012535      | 1.2  | 1.2  | 0    | 0    | 0 |
| IPR009742      | 4.53 | 0    | 4.53 | 0    | 0 |
| IPR009746      | 1.06 | 0    | 1.06 | 0    | 0 |
| IPR018450      | 1.11 | 1.11 | 0    | 0    | 0 |
| PD019538       | 1    | 0    | 1    | 0    | 0 |
| IPR002730      | 1.06 | 1.09 | 0    | 1    | 0 |
| IPR002739      | 2.07 | 0    | 0    | 2.07 | 0 |
| PTHR21673      | 1.25 | 1.25 | 0    | 0    | 0 |
| IPR014175      | 1    | 0    | 1    | 0    | 0 |
| IPR014174      | 1.14 | 0    | 1.14 | 0    | 0 |
| IPR014287      | 1.18 | 0    | 1.08 | 1.5  | 0 |
| IPR010701      | 8.83 | 8.83 | 0    | 0    | 0 |
| IPR010702      | 1.62 | 0    | 1.62 | 0    | 0 |
| PF10121        | 1    | 0    | 0    | 1    | 0 |
| IPR016466      | 1    | 0    | 0    | 1    | 0 |
| IPR008903      | 1    | 0    | 1    | 0    | 0 |
| IPR006739      | 3.6  | 0    | 3.6  | 0    | 0 |
| PTHR12479:SF1  | 2    | 2    | 0    | 0    | 0 |
| PTHR13793:SF1  | 1.47 | 1.47 | 0    | 0    | 0 |
| PTHR13518:SF2  | 1.08 | 1.08 | 0    | 0    | 0 |
| PTHR13518:SF1  | 1    | 1    | 0    | 0    | 0 |
| PTHR21584:SF7  | 1.57 | 1.57 | 0    | 0    | 0 |
| PTHR21584:SF1  | 2    | 2    | 0    | 0    | 0 |
| PD119415       | 1    | 0    | 1    | 0    | 0 |
| IPR020309      | 1.13 | 1.13 | 0    | 0    | 0 |
| PTHR20846      | 1.1  | 1.1  | 0    | 0    | 0 |
| PTHR11600:SF22 | 1    | 1    | 1    | 0    | 0 |

|                |       |       |       |      |   |
|----------------|-------|-------|-------|------|---|
| PTHR23033:SF1  | 1.14  | 1.14  | 0     | 0    | 0 |
| PTHR23033:SF2  | 1.2   | 1.2   | 0     | 0    | 0 |
| PD172636       | 1     | 0     | 1     | 0    | 0 |
| IPRO21472      | 3.69  | 0     | 3.69  | 0    | 0 |
| IPRO21473      | 1.06  | 0     | 1.06  | 0    | 0 |
| IPRO21476      | 2.44  | 2.44  | 0     | 0    | 0 |
| IPRO21477      | 2.5   | 0     | 2.5   | 0    | 0 |
| TIGR03623      | 1     | 0     | 1     | 0    | 0 |
| TIGR03620      | 1.33  | 0     | 1.33  | 0    | 0 |
| PTHR22147      | 1.06  | 1.07  | 1     | 0    | 0 |
| PTHR23095:SF5  | 2.67  | 2.67  | 0     | 0    | 0 |
| PTHR21490      | 1.35  | 1.35  | 0     | 0    | 0 |
| IPRO05883      | 1     | 0     | 1     | 0    | 0 |
| IPRO18614      | 1.19  | 1.19  | 0     | 0    | 0 |
| IPRO18615      | 1.12  | 1.12  | 0     | 0    | 0 |
| PTHR22593:SF4  | 1.08  | 1.08  | 0     | 0    | 0 |
| PTHR22593:SF3  | 1.33  | 1.33  | 0     | 0    | 0 |
| IPRO09948      | 1.02  | 0     | 1.02  | 0    | 0 |
| IPRO09947      | 1.56  | 1.56  | 0     | 0    | 0 |
| IPRO09941      | 3.25  | 0     | 3.25  | 0    | 0 |
| IPRO09942      | 1.33  | 0     | 1.33  | 0    | 0 |
| IPRO09943      | 1.88  | 2     | 1     | 0    | 0 |
| PD125763       | 1     | 1     | 0     | 0    | 0 |
| IPRO10276      | 4.75  | 4.75  | 0     | 0    | 0 |
| IPRO10272      | 2.05  | 0     | 2.05  | 0    | 0 |
| IPRO10273      | 2.43  | 0     | 2.43  | 0    | 0 |
| PTHR15157:SF3  | 1     | 1     | 0     | 0    | 0 |
| IPRO07896      | 2.65  | 0     | 2.65  | 0    | 0 |
| IPRO07893      | 3.75  | 2     | 3.77  | 0    | 0 |
| IPRO10851      | 11.71 | 11.71 | 0     | 0    | 0 |
| IPRO10854      | 10.83 | 0     | 10.83 | 0    | 0 |
| IPRO04123      | 1.41  | 1.41  | 0     | 0    | 0 |
| IPRO01990      | 4     | 4     | 0     | 0    | 0 |
| IPRO04122      | 1.88  | 1.88  | 0     | 0    | 0 |
| IPRO01668      | 1.4   | 0     | 1.4   | 0    | 0 |
| MF_00422       | 1     | 0     | 0     | 1    | 0 |
| IPRO19202      | 1     | 0     | 0     | 1    | 0 |
| IPRO19201      | 1.02  | 0     | 1.02  | 0    | 0 |
| IPRO19208      | 1.14  | 0     | 0     | 1.14 | 0 |
| IPRO19209      | 1     | 0     | 0     | 1    | 0 |
| IPRO18559      | 1     | 1     | 0     | 0    | 0 |
| IPRO18558      | 1     | 1     | 0     | 0    | 0 |
| IPRO18551      | 1.02  | 0     | 1.02  | 0    | 0 |
| IPRO18550      | 1.22  | 1     | 1.22  | 0    | 0 |
| IPRO18552      | 1.08  | 1.08  | 0     | 0    | 0 |
| IPRO18554      | 1.25  | 1.25  | 0     | 0    | 0 |
| IPRO09534      | 1.1   | 0     | 1.1   | 0    | 0 |
| IPRO09531      | 1.02  | 0     | 1.02  | 0    | 0 |
| IPRO09530      | 1     | 0     | 1     | 0    | 0 |
| IPRO09533      | 1.74  | 1.74  | 0     | 0    | 0 |
| IPRO09532      | 1     | 0     | 1     | 0    | 0 |
| IPRO09539      | 1.73  | 1.73  | 0     | 0    | 0 |
| IPRO09538      | 1.8   | 1.8   | 0     | 0    | 0 |
| PTHR21148:SF1  | 1.25  | 1.25  | 0     | 0    | 0 |
| IPRO11668      | 1.82  | 0     | 0     | 1.82 | 0 |
| IPRO11669      | 1.06  | 0     | 1.08  | 1    | 0 |
| IPRO11660      | 1.89  | 0     | 1.89  | 0    | 0 |
| IPRO10137      | 1.04  | 1     | 1.04  | 0    | 0 |
| PTHR19444:SF11 | 1.29  | 1.29  | 0     | 0    | 0 |
| PTHR13555:SF4  | 2     | 2     | 0     | 0    | 0 |
| PTHR12209      | 1.12  | 1.14  | 0     | 1    | 0 |
| PTHR21125      | 2.85  | 2.85  | 0     | 0    | 0 |
| PTHR21124      | 2.88  | 2.88  | 0     | 0    | 0 |
| PD140749       | 1     | 0     | 1     | 0    | 0 |
| IPRO07702      | 2.75  | 2.75  | 0     | 0    | 0 |
| IPRO20118      | 1.08  | 0     | 1.08  | 0    | 0 |
| IPRO20114      | 1.08  | 0     | 1.08  | 0    | 0 |
| IPRO20115      | 1.04  | 0     | 1.04  | 0    | 0 |
| PTHR10037:SF60 | 1.25  | 1.25  | 0     | 0    | 0 |

|                |      |      |      |      |   |
|----------------|------|------|------|------|---|
| IPR008387      | 1.5  | 1.5  | 0    | 0    | 0 |
| IPR019045      | 1.09 | 0    | 1.09 | 0    | 0 |
| IPR019046      | 1    | 0    | 1    | 0    | 0 |
| TIGR03019      | 1    | 0    | 1    | 0    | 0 |
| TIGR03016      | 1    | 0    | 1    | 0    | 0 |
| IPR018798      | 1.5  | 1.5  | 0    | 0    | 0 |
| IPR018797      | 1.64 | 1.64 | 0    | 0    | 0 |
| IPR018794      | 1.05 | 1.05 | 0    | 0    | 0 |
| IPR005610      | 1.32 | 1.33 | 1.31 | 0    | 0 |
| IPR009049      | 1.43 | 1.75 | 1    | 0    | 0 |
| IPR009040      | 1    | 0    | 1    | 1    | 0 |
| MF_02010       | 1    | 0    | 1    | 0    | 0 |
| IPR011468      | 4.14 | 0    | 4.14 | 0    | 0 |
| IPR011466      | 1.34 | 0    | 1.34 | 0    | 0 |
| IPR011463      | 1.5  | 0    | 1.5  | 0    | 0 |
| IPR010331      | 1.33 | 1    | 1.34 | 1    | 0 |
| IPR010330      | 1.07 | 0    | 1.07 | 0    | 0 |
| IPR010335      | 1.67 | 1.67 | 0    | 0    | 0 |
| IPR016656      | 1    | 1    | 0    | 0    | 0 |
| IPR009388      | 1.4  | 3    | 1.06 | 0    | 0 |
| IPR013176      | 1.3  | 1.3  | 0    | 0    | 0 |
| IPR013172      | 7.67 | 7.67 | 0    | 0    | 0 |
| IPR012884      | 1.29 | 0    | 1.29 | 0    | 0 |
| IPR000473      | 1.11 | 1.38 | 1.09 | 0    | 0 |
| PF10869        | 1.29 | 0    | 0    | 1.29 | 0 |
| PTHR13932      | 1    | 1    | 1    | 0    | 0 |
| PTHR11697:SF3  | 1    | 1    | 0    | 0    | 0 |
| PTHR17571:SF6  | 1.33 | 1.33 | 0    | 0    | 0 |
| IPR008589      | 1.59 | 0    | 1.61 | 1.38 | 0 |
| IPR004203      | 1.64 | 1.64 | 0    | 0    | 0 |
| IPR005155      | 1.06 | 1.07 | 0    | 1    | 0 |
| PTHR13061      | 1.12 | 1.26 | 1.09 | 1    | 0 |
| IPR008055      | 1.4  | 1.4  | 0    | 0    | 0 |
| IPR018968      | 2.37 | 1    | 2.38 | 0    | 0 |
| PF10087        | 1.13 | 1    | 1.14 | 0    | 0 |
| PF10082        | 1.38 | 0    | 1.38 | 0    | 0 |
| IPR001349      | 1.77 | 1.77 | 0    | 0    | 0 |
| PTHR23191      | 1.62 | 1.62 | 0    | 0    | 0 |
| IPR014518      | 1    | 0    | 0    | 1    | 0 |
| IPR014515      | 1    | 0    | 0    | 1    | 0 |
| IPR014517      | 1    | 0    | 0    | 1    | 0 |
| IPR007659      | 3    | 3    | 0    | 0    | 0 |
| TIGR01172      | 1.06 | 0    | 1.06 | 1    | 0 |
| TIGR03159      | 1    | 0    | 1    | 1    | 0 |
| TIGR03155      | 1    | 0    | 0    | 1    | 0 |
| PTHR23056:SF2  | 1.13 | 1.13 | 0    | 0    | 0 |
| PTHR23056:SF6  | 1.77 | 1.77 | 0    | 0    | 0 |
| PTHR23056:SF7  | 1.7  | 1.7  | 0    | 0    | 0 |
| TIGR02287      | 1    | 0    | 1    | 0    | 0 |
| MF_00125       | 1    | 0    | 1    | 0    | 0 |
| PTHR19410:SF53 | 1.29 | 0    | 1.2  | 1.5  | 0 |
| IPR016385      | 1    | 0    | 1    | 0    | 0 |
| IPR000678      | 1.62 | 1.62 | 0    | 0    | 0 |
| IPR012808      | 1.11 | 1.16 | 1.1  | 0    | 0 |
| IPR013372      | 1    | 0    | 1    | 0    | 0 |
| PTHR16057      | 1.29 | 1.29 | 0    | 0    | 0 |
| IPR021140      | 1.1  | 0    | 1.1  | 0    | 0 |
| IPR021146      | 1.51 | 1    | 1.51 | 0    | 0 |
| IPR021145      | 1.35 | 0    | 1.35 | 0    | 0 |
| PF06539        | 1.02 | 1    | 1.02 | 1    | 0 |
| PTHR13261      | 1.12 | 1.12 | 0    | 0    | 0 |
| PTHR13260      | 1.09 | 1.09 | 0    | 0    | 0 |
| PTHR23341:SF1  | 3    | 3    | 0    | 0    | 0 |
| PTHR13269      | 1    | 1    | 0    | 0    | 0 |
| IPR008218      | 1.23 | 1.44 | 1.08 | 1.05 | 0 |
| IPR015000      | 1.06 | 0    | 1.06 | 0    | 0 |
| IPR015001      | 1.02 | 0    | 1.02 | 1    | 0 |
| IPR015003      | 1    | 0    | 1    | 0    | 0 |
| IPR005413      | 1    | 0    | 1    | 0    | 0 |



|                |       |       |      |      |   |
|----------------|-------|-------|------|------|---|
| PF05169        | 1     | 1     | 1    | 0    | 0 |
| PTHR14540      | 1.2   | 1.2   | 0    | 0    | 0 |
| PTHR14549      | 1.05  | 1.05  | 0    | 0    | 0 |
| IPR017408      | 1.07  | 1.07  | 0    | 0    | 0 |
| IPR017404      | 2     | 2     | 0    | 0    | 0 |
| IPR008848      | 1.88  | 0     | 0    | 1.88 | 0 |
| PTHR14899      | 1.43  | 1.43  | 0    | 0    | 0 |
| IPR016754      | 1     | 0     | 0    | 1    | 0 |
| IPR012922      | 2.88  | 0     | 1    | 3.14 | 0 |
| PTHR21862      | 1.36  | 1.36  | 0    | 0    | 0 |
| IPR018385      | 1.66  | 0     | 1.66 | 1    | 0 |
| TIGR01755      | 1     | 0     | 1    | 1    | 0 |
| IPR020438      | 2     | 2     | 0    | 0    | 0 |
| PF10760        | 1.23  | 0     | 1.23 | 0    | 0 |
| IPR020386      | 1     | 0     | 1    | 0    | 0 |
| PTHR23019      | 1.13  | 1.13  | 0    | 0    | 0 |
| PD030057       | 2     | 2     | 0    | 0    | 0 |
| PD394376       | 1     | 0     | 1    | 0    | 0 |
| PTHR21416      | 1.25  | 1.25  | 0    | 0    | 0 |
| PTHR21411      | 2.14  | 2.14  | 0    | 0    | 0 |
| IPR022124      | 8.24  | 8.69  | 1    | 0    | 0 |
| IPR003678      | 7.88  | 0     | 7.88 | 0    | 0 |
| IPR007318      | 1.3   | 1.3   | 0    | 0    | 0 |
| PF09274        | 1.38  | 0     | 1.38 | 0    | 0 |
| IPR003671      | 23.33 | 23.33 | 0    | 0    | 0 |
| IPR006498      | 1.3   | 1     | 1.3  | 0    | 0 |
| PD404576       | 1.33  | 1.33  | 0    | 0    | 0 |
| TIGR02099      | 1     | 0     | 1    | 0    | 0 |
| TIGR02092      | 1     | 0     | 1    | 0    | 0 |
| IPR003510      | 1.03  | 0     | 1.03 | 0    | 0 |
| PTHR19222:SF28 | 1     | 0     | 1    | 1    | 0 |
| PF09184        | 1.03  | 1.03  | 0    | 0    | 0 |
| IPR001916      | 8.5   | 8.5   | 0    | 0    | 0 |
| IPR001911      | 1.18  | 1.42  | 1.16 | 0    | 0 |
| IPR007364      | 1     | 1     | 0    | 1    | 0 |
| PTHR18864      | 2.2   | 2.2   | 0    | 0    | 0 |
| IPR019440      | 1.11  | 1.11  | 1    | 0    | 0 |
| PF07050        | 1.47  | 0     | 1.48 | 1    | 0 |
| IPR021335      | 1     | 0     | 1    | 0    | 0 |
| IPR021334      | 1     | 0     | 1    | 0    | 0 |
| IPR021337      | 1.85  | 1     | 1.92 | 0    | 0 |
| IPR021336      | 2.21  | 0     | 2.21 | 0    | 0 |
| IPR021333      | 2.04  | 1     | 2.06 | 0    | 0 |
| IPR021332      | 1     | 0     | 1    | 0    | 0 |
| IPR021339      | 1.03  | 0     | 1.03 | 0    | 0 |
| PTHR13344      | 1.33  | 1.33  | 0    | 0    | 0 |
| IPR018889      | 1.25  | 1.25  | 0    | 0    | 0 |
| IPR018887      | 1.5   | 1.5   | 0    | 0    | 0 |
| PF06093        | 1.06  | 1.1   | 0    | 1    | 0 |
| IPR016959      | 1     | 0     | 1    | 0    | 0 |
| IPR016958      | 1     | 0     | 1    | 0    | 0 |
| IPR012672      | 1     | 0     | 1    | 0    | 0 |
| IPR016950      | 2     | 0     | 0    | 2    | 0 |
| IPR016957      | 1.67  | 0     | 1.67 | 0    | 0 |
| IPR016954      | 2     | 0     | 0    | 2    | 0 |
| IPR005325      | 3.11  | 0     | 3.11 | 0    | 0 |
| IPR019288      | 1.06  | 0     | 1.06 | 0    | 0 |
| IPR019286      | 1.25  | 0     | 1.26 | 1    | 0 |
| IPR019284      | 1     | 0     | 1    | 0    | 0 |
| IPR019285      | 2.94  | 0     | 2.94 | 0    | 0 |
| IPR004983      | 6     | 0     | 6    | 0    | 0 |
| PTHR23067:SF2  | 1     | 1     | 0    | 0    | 0 |
| IPR005582      | 1.03  | 0     | 1.03 | 0    | 0 |
| IPR005583      | 1.03  | 1.33  | 1.02 | 1    | 0 |
| IPR005585      | 1.02  | 0     | 1.02 | 0    | 0 |
| IPR005588      | 1.02  | 1     | 1.02 | 0    | 0 |
| PTHR13437      | 1.33  | 1.33  | 0    | 0    | 0 |
| IPR002672      | 1.44  | 1.44  | 0    | 0    | 0 |
| IPR002671      | 1.6   | 1.6   | 0    | 0    | 0 |

|                |      |      |      |      |   |
|----------------|------|------|------|------|---|
| IPR006800      | 1.67 | 1.67 | 0    | 0    | 0 |
| PTHR10887:SF3  | 1    | 1    | 0    | 0    | 0 |
| PTHR10887:SF6  | 1.4  | 5    | 1.13 | 0    | 0 |
| PTHR10887:SF5  | 1.38 | 1.38 | 0    | 0    | 0 |
| IPR010426      | 2.75 | 1    | 3.12 | 1.33 | 0 |
| PTHR15502:SF6  | 1.5  | 1.5  | 0    | 0    | 0 |
| PTHR21932      | 3.08 | 3.08 | 0    | 0    | 0 |
| IPR014948      | 1.03 | 0    | 1.03 | 1    | 0 |
| IPR014949      | 1    | 0    | 1    | 0    | 0 |
| IPR014943      | 1.04 | 0    | 1.04 | 0    | 0 |
| IPR014941      | 3.67 | 0    | 3.67 | 0    | 0 |
| IPR014946      | 1.06 | 1.33 | 1    | 0    | 0 |
| IPR014947      | 1.03 | 2    | 1    | 0    | 0 |
| PTHR15263      | 2    | 2    | 0    | 0    | 0 |
| IPR016540      | 1    | 0    | 1    | 1    | 0 |
| IPR016541      | 1    | 0    | 1    | 0    | 0 |
| IPR016543      | 1.4  | 1.4  | 0    | 0    | 0 |
| IPR016545      | 1    | 0    | 1    | 0    | 0 |
| IPR016546      | 1    | 0    | 1    | 0    | 0 |
| IPR016549      | 2.83 | 2.83 | 0    | 0    | 0 |
| TIGR03472      | 1    | 0    | 1    | 0    | 0 |
| PF11021        | 1.08 | 0    | 1.08 | 0    | 0 |
| PF11023        | 1    | 0    | 1    | 0    | 0 |
| IPR010443      | 2.5  | 0    | 2.5  | 0    | 0 |
| PTHR12286      | 1    | 1    | 1    | 0    | 0 |
| TIGR01653      | 1    | 0    | 1    | 0    | 0 |
| TIGR01652      | 1.5  | 1.5  | 0    | 0    | 0 |
| TIGR01655      | 1.31 | 0    | 1.31 | 0    | 0 |
| TIGR01654      | 1    | 0    | 1    | 0    | 0 |
| PTHR20960      | 1.08 | 1.08 | 0    | 0    | 0 |
| IPR020196      | 1    | 0    | 1    | 0    | 0 |
| IPR020199      | 1    | 0    | 1    | 1    | 0 |
| PD619568       | 1.1  | 1.1  | 0    | 0    | 0 |
| PF09847        | 1.05 | 0    | 1.1  | 1    | 0 |
| TIGR03092      | 1    | 0    | 1    | 0    | 0 |
| PTHR10997:SF7  | 1    | 1    | 0    | 0    | 0 |
| PTHR22552      | 3.08 | 3.08 | 0    | 0    | 0 |
| IPR018715      | 1.03 | 1    | 1.03 | 0    | 0 |
| IPR018714      | 1.03 | 1.33 | 1.03 | 1    | 0 |
| IPR018719      | 1.04 | 0    | 1.04 | 0    | 0 |
| IPR021649      | 1    | 0    | 1    | 0    | 0 |
| PTHR22953      | 1.6  | 1.86 | 1    | 0    | 0 |
| PTHR21605      | 1.22 | 1.22 | 0    | 0    | 0 |
| PTHR21602      | 1.17 | 1.17 | 0    | 0    | 0 |
| IPR000966      | 4.17 | 4.17 | 0    | 0    | 0 |
| IPR006757      | 1.82 | 2.08 | 1    | 0    | 0 |
| PD208305       | 1    | 0    | 1    | 0    | 0 |
| PF07241        | 1    | 0    | 1    | 0    | 0 |
| IPR001704      | 1.25 | 1.25 | 0    | 0    | 0 |
| IPR001705      | 1.24 | 1.33 | 1.24 | 0    | 0 |
| IPR001702      | 7.32 | 2.5  | 7.38 | 0    | 0 |
| IPR013712      | 1.33 | 1.33 | 0    | 0    | 0 |
| IPR008506      | 1.09 | 1.09 | 0    | 0    | 0 |
| IPR008505      | 3    | 0    | 3    | 0    | 0 |
| IPR004281      | 1.46 | 1.46 | 0    | 0    | 0 |
| IPR008508      | 1.12 | 0    | 1    | 1.23 | 0 |
| PD012638       | 1    | 0    | 1    | 0    | 0 |
| MF_01158       | 1    | 0    | 1    | 0    | 0 |
| PTHR16434      | 1    | 1    | 0    | 0    | 0 |
| IPR009368      | 1.92 | 0    | 1.92 | 0    | 0 |
| IPR009364      | 2    | 0    | 2    | 0    | 0 |
| IPR009366      | 1.01 | 0    | 1.01 | 0    | 0 |
| IPR009367      | 1.24 | 2.86 | 1.06 | 0    | 0 |
| PD026230       | 2    | 2    | 0    | 0    | 0 |
| PTHR13603      | 1.22 | 1.22 | 0    | 0    | 0 |
| PTHR13602      | 1    | 1    | 0    | 0    | 0 |
| IPR019242      | 1    | 0    | 1    | 0    | 0 |
| PTHR10887:SF26 | 1.2  | 1.2  | 0    | 0    | 0 |
| PTHR15380      | 1.6  | 1.6  | 0    | 0    | 0 |

|                |       |      |      |      |   |
|----------------|-------|------|------|------|---|
| PTHR14385      | 1     | 1    | 0    | 0    | 0 |
| PTHR14381      | 1.09  | 1.09 | 0    | 0    | 0 |
| IPR014597      | 1     | 0    | 1    | 0    | 0 |
| IPR014596      | 1     | 0    | 1    | 0    | 0 |
| IPR017020      | 1.25  | 0    | 1.25 | 0    | 0 |
| IPR017024      | 1     | 0    | 1    | 0    | 0 |
| IPR017026      | 1.41  | 0    | 1.41 | 0    | 0 |
| IPR017028      | 1.2   | 0    | 1.2  | 0    | 0 |
| IPR017029      | 1     | 0    | 1    | 0    | 0 |
| PTHR21284:SF2  | 1.38  | 1.38 | 0    | 0    | 0 |
| PTHR21284:SF1  | 1.21  | 1.21 | 0    | 0    | 0 |
| PF10232        | 1.16  | 1.16 | 0    | 0    | 0 |
| PTHR14920      | 1.38  | 1.38 | 0    | 0    | 0 |
| PTHR14927      | 1.08  | 1.08 | 0    | 0    | 0 |
| PTHR12566      | 1.73  | 1.73 | 0    | 0    | 0 |
| PTHR19410:SF62 | 1.2   | 1.22 | 1.17 | 0    | 0 |
| PTHR21370      | 1     | 1    | 0    | 0    | 0 |
| PTHR21958      | 1     | 1    | 0    | 0    | 0 |
| PTHR21959      | 10.2  | 10.2 | 0    | 0    | 0 |
| PTHR21512:SF8  | 1     | 1    | 0    | 0    | 0 |
| PF09555        | 1     | 0    | 1    | 0    | 0 |
| IPR020016      | 2.07  | 0    | 2.07 | 0    | 0 |
| PTHR12187:SF3  | 2.4   | 2.4  | 0    | 0    | 0 |
| PTHR12187:SF4  | 2.75  | 2.75 | 0    | 0    | 0 |
| TIGR00221      | 1.06  | 0    | 1.06 | 0    | 0 |
| PF08203        | 1     | 1    | 0    | 0    | 0 |
| IPR012021      | 1     | 0    | 0    | 1    | 0 |
| IPR012020      | 1.17  | 1.54 | 1.05 | 0    | 0 |
| IPR019672      | 1     | 0    | 1    | 0    | 0 |
| IPR019671      | 1.02  | 0    | 1.02 | 0    | 0 |
| IPR019676      | 1     | 0    | 1    | 0    | 0 |
| IPR019675      | 1.02  | 0    | 1.02 | 0    | 0 |
| IPR019679      | 1     | 0    | 1    | 0    | 0 |
| IPR021853      | 1.04  | 0    | 1.04 | 0    | 0 |
| PD135085       | 1     | 1    | 0    | 0    | 0 |
| PTHR21036      | 1     | 1    | 0    | 0    | 0 |
| PTHR21031      | 1.58  | 1.58 | 0    | 0    | 0 |
| IPR009164      | 1.06  | 0    | 1.06 | 0    | 0 |
| IPR015089      | 1.65  | 1.65 | 0    | 0    | 0 |
| PTHR15528:SF6  | 1.67  | 1.67 | 0    | 0    | 0 |
| IPR015080      | 1     | 1    | 0    | 0    | 0 |
| IPR015081      | 1     | 0    | 1    | 0    | 0 |
| IPR015084      | 1.15  | 0    | 1.15 | 0    | 0 |
| PF08981        | 1.03  | 0    | 1    | 1.06 | 0 |
| MF_01256       | 1     | 0    | 1    | 0    | 0 |
| IPR002155      | 3.92  | 0    | 3.8  | 4.78 | 0 |
| IPR009833      | 1.31  | 0    | 1.31 | 0    | 0 |
| IPR009838      | 1.22  | 0    | 1.22 | 0    | 0 |
| IPR009839      | 1.07  | 0    | 1.07 | 0    | 0 |
| PTHR11199      | 1.89  | 1.89 | 0    | 0    | 0 |
| IPR010070      | 5.9   | 0    | 5.9  | 0    | 0 |
| IPR010075      | 1     | 0    | 1    | 1    | 0 |
| IPR007479      | 1.02  | 1    | 1.02 | 0    | 0 |
| PF09619        | 1.17  | 0    | 1.17 | 0    | 0 |
| PTHR12360      | 1.31  | 1.31 | 0    | 0    | 0 |
| PTHR10499:SF52 | 1.89  | 2    | 1    | 0    | 0 |
| PTHR10499:SF51 | 1.45  | 1.5  | 1    | 0    | 0 |
| PTHR18950      | 3     | 3    | 0    | 0    | 0 |
| PTHR10740:SF1  | 1.86  | 1.86 | 0    | 0    | 0 |
| PF07169        | 2     | 2    | 0    | 0    | 0 |
| IPR019995      | 1     | 0    | 1    | 0    | 0 |
| IPR005298      | 6.31  | 0    | 6.31 | 0    | 0 |
| IPR005299      | 10.71 | 30   | 1.06 | 0    | 0 |
| IPR019330      | 1.22  | 1.22 | 0    | 0    | 0 |
| IPR008716      | 1     | 0    | 1    | 0    | 0 |
| IPR008717      | 2.15  | 2.15 | 0    | 0    | 0 |
| IPR008712      | 1.15  | 0    | 1.15 | 0    | 0 |
| IPR008713      | 1.48  | 1    | 1.49 | 0    | 0 |
| IPR008711      | 1.26  | 1    | 1.27 | 0    | 0 |

|                |       |      |       |      |   |
|----------------|-------|------|-------|------|---|
| IPR009440      | 1.25  | 0    | 1.25  | 0    | 0 |
| IPR009446      | 1     | 1    | 0     | 0    | 0 |
| PTHR14224      | 28.8  | 28.8 | 0     | 0    | 0 |
| PTHR14222      | 1.64  | 1.64 | 0     | 0    | 0 |
| PF11419        | 1     | 0    | 0     | 1    | 0 |
| PTHR14909:SF2  | 1.33  | 1.33 | 0     | 0    | 0 |
| PF04888        | 1.17  | 0    | 1.17  | 0    | 0 |
| PTHR19211:SF11 | 1     | 1    | 1     | 0    | 0 |
| IPR003418      | 1.02  | 0    | 1.02  | 0    | 0 |
| IPR003417      | 1.75  | 1.75 | 0     | 0    | 0 |
| PTHR21232      | 1     | 1    | 0     | 0    | 0 |
| TIGR03368      | 1     | 0    | 1     | 0    | 0 |
| TIGR02019      | 1     | 0    | 1     | 0    | 0 |
| IPR007673      | 1.02  | 1.02 | 0     | 0    | 0 |
| IPR007677      | 5.62  | 5.62 | 0     | 0    | 0 |
| IPR000028      | 3.52  | 3.52 | 0     | 0    | 0 |
| IPR000021      | 3.68  | 0    | 3.68  | 0    | 0 |
| PD113106       | 1.29  | 0    | 1.29  | 0    | 0 |
| IPR021823      | 2.6   | 0    | 2.6   | 0    | 0 |
| PTHR13342      | 1     | 1    | 0     | 0    | 0 |
| PTHR13343      | 1.55  | 1.55 | 0     | 0    | 0 |
| PTHR13347      | 1.15  | 1.15 | 0     | 0    | 0 |
| IPR018803      | 3.81  | 4.1  | 1     | 0    | 0 |
| IPR018801      | 1.16  | 1.17 | 1     | 0    | 0 |
| IPR021951      | 1     | 0    | 1     | 0    | 0 |
| IPR021952      | 3.12  | 0    | 3.12  | 0    | 0 |
| IPR006885      | 1.17  | 1.16 | 1.18  | 0    | 0 |
| IPR009283      | 1.84  | 1.84 | 0     | 0    | 0 |
| PTHR11533:SF38 | 1.12  | 1.12 | 0     | 0    | 0 |
| IPR003901      | 1.24  | 0    | 0     | 1.24 | 0 |
| IPR014491      | 1.03  | 0    | 1.03  | 0    | 0 |
| IPR013911      | 1     | 1    | 0     | 0    | 0 |
| IPR003019      | 6.5   | 6.5  | 0     | 0    | 0 |
| PF04605        | 1.09  | 0    | 1.09  | 0    | 0 |
| PF06604        | 1     | 0    | 1     | 0    | 0 |
| PF06609        | 2.13  | 2.13 | 0     | 0    | 0 |
| PTHR21407:SF2  | 1     | 1    | 0     | 0    | 0 |
| PD072590       | 1.1   | 0    | 1.1   | 0    | 0 |
| PTHR10527:SF5  | 2.11  | 2.11 | 0     | 0    | 0 |
| PTHR10527:SF6  | 1.56  | 1.56 | 0     | 0    | 0 |
| IPR004375      | 2.06  | 0    | 2.06  | 0    | 0 |
| IPR019625      | 1.03  | 0    | 1.03  | 0    | 0 |
| PTHR14274:SF2  | 1.2   | 1.2  | 0     | 0    | 0 |
| PTHR14274:SF1  | 1     | 1    | 0     | 0    | 0 |
| PTHR16166:SF26 | 1.17  | 1.17 | 0     | 0    | 0 |
| IPR020264      | 1.05  | 0    | 1.05  | 0    | 0 |
| IPR020260      | 1     | 0    | 1     | 0    | 0 |
| IPR020261      | 1     | 0    | 0     | 1    | 0 |
| IPR020262      | 1.03  | 0    | 1.03  | 0    | 0 |
| IPR020263      | 1.08  | 0    | 1.08  | 0    | 0 |
| IPR005243      | 1.21  | 0    | 1.18  | 1.43 | 0 |
| TIGR03543      | 1     | 0    | 1     | 0    | 0 |
| PTHR14418      | 1.33  | 1.33 | 0     | 0    | 0 |
| TIGR02635      | 1     | 0    | 1     | 0    | 0 |
| TIGR00775      | 1     | 0    | 1     | 0    | 0 |
| PTHR21684      | 1.21  | 1.21 | 0     | 0    | 0 |
| PTHR21685      | 2.25  | 2.25 | 0     | 0    | 0 |
| PTHR21683      | 2.22  | 2.22 | 0     | 0    | 0 |
| PTHR11260:SF10 | 1     | 0    | 1     | 0    | 0 |
| PTHR11260:SF16 | 1.83  | 1.83 | 0     | 0    | 0 |
| IPR003256      | 1     | 1    | 1     | 0    | 0 |
| IPR000789      | 1.6   | 1.6  | 0     | 0    | 0 |
| PF06447        | 1.28  | 0    | 1.28  | 0    | 0 |
| IPR000258      | 26.25 | 0    | 26.25 | 0    | 0 |
| PF12189        | 1     | 0    | 1     | 0    | 0 |
| IPR001780      | 1.39  | 1.43 | 0     | 1    | 0 |
| PTHR13946:SF16 | 1     | 1    | 0     | 1    | 0 |
| IPR015827      | 1.18  | 1.18 | 0     | 0    | 0 |
| PD117946       | 1.09  | 0    | 1.09  | 0    | 0 |

|                |      |      |      |      |   |
|----------------|------|------|------|------|---|
| IPR012447      | 5.53 | 0    | 5.53 | 0    | 0 |
| IPR012449      | 2.08 | 0    | 2.08 | 0    | 0 |
| IPR001123      | 4.97 | 1.5  | 5.24 | 1.31 | 0 |
| IPR021564      | 1    | 0    | 1    | 0    | 0 |
| IPR021560      | 1.13 | 0    | 1.13 | 0    | 0 |
| IPR021562      | 1.05 | 1.25 | 1    | 0    | 0 |
| IPR022037      | 1.75 | 0    | 1.75 | 0    | 0 |
| IPR011233      | 1    | 0    | 1    | 0    | 0 |
| IPR011231      | 1.23 | 0    | 1.23 | 0    | 0 |
| IPR008483      | 3    | 0    | 3    | 0    | 0 |
| IPR008481      | 2.75 | 0    | 2.75 | 0    | 0 |
| PTHR12988:SF3  | 1    | 1    | 0    | 0    | 0 |
| PTHR12988:SF1  | 3    | 3    | 0    | 0    | 0 |
| IPR008489      | 1.13 | 0    | 1.13 | 0    | 0 |
| IPR018742      | 1    | 0    | 1    | 0    | 0 |
| IPR010548      | 2.08 | 2.08 | 0    | 0    | 0 |
| IPR019319      | 1.14 | 1.14 | 0    | 0    | 0 |
| PTHR15304      | 2.67 | 2.67 | 0    | 0    | 0 |
| IPR007940      | 2.56 | 2.56 | 0    | 0    | 0 |
| IPR020528      | 1.09 | 0    | 1.09 | 0    | 0 |
| PTHR11269:SF14 | 1.25 | 1.25 | 0    | 0    | 0 |
| PF11106        | 1    | 0    | 1    | 0    | 0 |
| PF11105        | 1.18 | 1.18 | 0    | 0    | 0 |
| PF11109        | 2    | 2    | 0    | 0    | 0 |
| PTHR12651      | 1.19 | 1.19 | 0    | 0    | 0 |
| PTHR12655      | 1.83 | 1.84 | 1    | 0    | 0 |
| PTHR12658      | 1.45 | 1.45 | 0    | 0    | 0 |
| PTHR12487      | 1.11 | 1.11 | 0    | 0    | 0 |
| PTHR21021:SF15 | 1    | 1    | 1    | 0    | 0 |
| PF11813        | 1    | 0    | 1    | 0    | 0 |
| IPR010706      | 1    | 0    | 1    | 0    | 0 |
| IPR020093      | 1    | 0    | 1    | 0    | 0 |
| IPR020090      | 2.88 | 2.88 | 0    | 0    | 0 |
| IPR020099      | 1    | 0    | 1    | 0    | 0 |
| PTHR21704:SF5  | 1.25 | 1.25 | 0    | 0    | 0 |
| PTHR21857:SF2  | 1.09 | 1.09 | 0    | 0    | 0 |
| PTHR12716:SF9  | 1    | 1    | 0    | 0    | 0 |
| PTHR12716:SF8  | 1.6  | 1.6  | 0    | 0    | 0 |
| IPR021768      | 1.13 | 0    | 1.13 | 0    | 0 |
| IPR021769      | 4.06 | 1    | 4.24 | 0    | 0 |
| IPR021762      | 1.3  | 0    | 1.3  | 0    | 0 |
| IPR022231      | 1.6  | 0    | 1.6  | 0    | 0 |
| IPR022236      | 1.46 | 0    | 1.46 | 0    | 0 |
| PTHR13422:SF1  | 1.25 | 1.25 | 0    | 0    | 0 |
| PTHR13422:SF2  | 1.18 | 1.18 | 0    | 0    | 0 |
| PTHR22696      | 2.67 | 2.67 | 0    | 0    | 0 |
| PTHR21521      | 1.14 | 1.15 | 1    | 0    | 0 |
| PTHR21526      | 1.08 | 1.08 | 0    | 0    | 0 |
| PTHR21529      | 2.5  | 2.5  | 0    | 0    | 0 |
| IPR005935      | 1    | 1    | 1    | 0    | 0 |
| TIGR00924      | 1    | 0    | 1    | 0    | 0 |
| IPR008873      | 1.05 | 0    | 1.05 | 0    | 0 |
| IPR008874      | 1.11 | 0    | 1.11 | 0    | 0 |
| IPR008878      | 2.69 | 1    | 2.7  | 0    | 0 |
| PTHR21669:SF2  | 1.6  | 1.6  | 0    | 0    | 0 |
| MF_01282       | 1    | 0    | 1    | 0    | 0 |
| IPR003426      | 1    | 0    | 1    | 0    | 0 |
| IPR003420      | 1.06 | 0    | 1.07 | 1    | 0 |
| PTHR15853      | 1.14 | 1.14 | 0    | 0    | 0 |
| PF08128        | 1.18 | 0    | 1.18 | 0    | 0 |
| IPR007217      | 1.33 | 1.33 | 0    | 0    | 0 |
| IPR007215      | 1.01 | 0    | 1.01 | 1    | 0 |
| IPR008469      | 2.33 | 2.33 | 0    | 0    | 0 |
| IPR008463      | 1.02 | 0    | 1.02 | 0    | 0 |
| IPR008466      | 1.89 | 1.89 | 0    | 0    | 0 |
| IPR021248      | 1.91 | 0    | 1.91 | 0    | 0 |
| IPR021241      | 1.15 | 0    | 1.15 | 0    | 0 |
| IPR021240      | 1    | 0    | 1    | 0    | 0 |
| IPR008798      | 1.5  | 0    | 1.5  | 0    | 0 |

|               |       |       |      |      |   |
|---------------|-------|-------|------|------|---|
| IPR008799     | 1     | 0     | 1    | 0    | 0 |
| IPR008797     | 3.11  | 5.22  | 1    | 0    | 0 |
| PTHR16779     | 1.26  | 1.38  | 0    | 1    | 0 |
| IPR007347     | 1.46  | 8     | 1.39 | 0    | 0 |
| IPR005212     | 2.44  | 0     | 2.44 | 0    | 0 |
| IPR016823     | 1     | 0     | 1    | 0    | 0 |
| PF02409       | 3     | 0     | 3    | 0    | 0 |
| IPR002293     | 1.27  | 1.53  | 1.17 | 1.78 | 0 |
| IPR010736     | 23.79 | 23.79 | 0    | 0    | 0 |
| IPR010739     | 1.26  | 0     | 1.26 | 0    | 0 |
| IPR010738     | 3.56  | 0     | 3.56 | 0    | 0 |
| TIGR00814     | 1.23  | 0     | 1.23 | 0    | 0 |
| PTHR12444     | 1.75  | 1.75  | 0    | 0    | 0 |
| IPR021688     | 1     | 0     | 1    | 0    | 0 |
| PD396545      | 1.33  | 1.33  | 0    | 0    | 0 |
| IPR020979     | 1     | 0     | 1    | 0    | 0 |
| IPR020351     | 1.67  | 0     | 1.67 | 0    | 0 |
| IPR020353     | 1.24  | 0     | 1.24 | 0    | 0 |
| IPR020354     | 1.05  | 1     | 1.05 | 0    | 0 |
| IPR020357     | 1.23  | 0     | 1.23 | 0    | 0 |
| IPR020359     | 1.02  | 0     | 1.02 | 0    | 0 |
| IPR001379     | 1     | 0     | 1    | 0    | 0 |
| IPR012101     | 1.33  | 1.33  | 0    | 0    | 0 |
| IPR021481     | 1.17  | 0     | 1.17 | 0    | 0 |
| PTHR21770     | 1.4   | 1.4   | 0    | 0    | 0 |
| PTHR21771     | 1.2   | 1.2   | 0    | 0    | 0 |
| PTHR21779     | 1.46  | 1.46  | 0    | 0    | 0 |
| IPR018666     | 1.17  | 0     | 1.17 | 0    | 0 |
| IPR018664     | 1     | 0     | 1    | 1    | 0 |
| IPR018662     | 1     | 0     | 0    | 1    | 0 |
| IPR018668     | 1.27  | 0     | 1.27 | 0    | 0 |
| IPR009206     | 1     | 0     | 1    | 0    | 0 |
| IPR005658     | 1.03  | 1     | 1.03 | 0    | 0 |
| IPR022080     | 1     | 0     | 1    | 0    | 0 |
| PTHR15722:SF4 | 1.44  | 1.44  | 0    | 0    | 0 |
| IPR009971     | 1.02  | 0     | 1.02 | 0    | 0 |
| IPR009978     | 1.15  | 0     | 1.15 | 0    | 0 |
| IPR014417     | 1     | 0     | 1    | 0    | 0 |
| IPR017145     | 1.1   | 1     | 1.11 | 0    | 0 |
| IPR017144     | 1     | 0     | 1    | 0    | 0 |
| IPR017143     | 1.03  | 0     | 1.03 | 0    | 0 |
| MF_00220_B    | 1     | 0     | 1    | 0    | 0 |
| IPR007531     | 1.81  | 1.81  | 0    | 0    | 0 |
| IPR007530     | 1.11  | 0     | 1.11 | 0    | 0 |
| IPR007536     | 1.01  | 1     | 1.01 | 0    | 0 |
| IPR000549     | 1.8   | 2.89  | 1.51 | 0    | 0 |
| IPR000548     | 2.82  | 2.82  | 0    | 0    | 0 |
| IPR010869     | 1.65  | 1     | 1.66 | 0    | 0 |
| IPR010862     | 1.54  | 0     | 1.54 | 0    | 0 |
| IPR010864     | 1.04  | 0     | 1.04 | 0    | 0 |
| IPR010866     | 1     | 0     | 1    | 0    | 0 |
| PF07331       | 1.93  | 1     | 1.94 | 0    | 0 |
| PF06686       | 1.06  | 0     | 1.06 | 0    | 0 |
| IPR008617     | 2     | 0     | 2    | 0    | 0 |
| PTHR10074:SF2 | 1     | 1     | 1    | 0    | 0 |
| PTHR10074:SF3 | 1.67  | 0     | 1.67 | 0    | 0 |
| PTHR10074:SF4 | 1.44  | 1.5   | 1    | 0    | 0 |
| PTHR10074:SF5 | 1.5   | 2     | 1.33 | 0    | 0 |
| PTHR10074:SF7 | 1.1   | 1     | 1.11 | 1    | 0 |
| IPR009562     | 1.05  | 0     | 1.05 | 0    | 0 |
| IPR009565     | 1.28  | 1.28  | 0    | 0    | 0 |
| IPR011385     | 1.03  | 0     | 1.03 | 0    | 0 |
| IPR014358     | 1.2   | 2.25  | 1.05 | 0    | 0 |
| PTHR15725     | 1.89  | 1.89  | 0    | 0    | 0 |
| PTHR15728     | 1     | 1     | 0    | 0    | 0 |
| PTHR22401     | 1.57  | 1.57  | 0    | 0    | 0 |
| PTHR21173     | 1     | 1     | 0    | 0    | 0 |
| PTHR21175     | 1.07  | 1.07  | 0    | 0    | 0 |
| PD040376      | 1.06  | 0     | 1.06 | 0    | 0 |

|                |      |      |      |     |   |
|----------------|------|------|------|-----|---|
| PD072652       | 1.4  | 1.4  | 0    | 0   | 0 |
| PTHR11064:SF1  | 1.44 | 1.44 | 0    | 0   | 0 |
| IPR019187      | 1.88 | 1.88 | 0    | 0   | 0 |
| PTHR10992:SF17 | 1.24 | 1.69 | 1.14 | 1   | 0 |
| PF09792        | 1.48 | 1.48 | 0    | 0   | 0 |
| IPR007738      | 1.75 | 1.75 | 0    | 0   | 0 |
| IPR007736      | 3.57 | 3.57 | 0    | 0   | 0 |
| IPR007731      | 1.18 | 0    | 1.18 | 0   | 0 |
| IPR007733      | 2.31 | 2.31 | 0    | 0   | 0 |
| IPR007732      | 1.36 | 1.36 | 0    | 0   | 0 |
| IPR007082      | 1    | 1    | 1    | 0   | 0 |
| IPR008306      | 1    | 0    | 1    | 0   | 0 |
| PTHR19288:SF11 | 2.6  | 2.6  | 0    | 0   | 0 |
| PD127999       | 1    | 0    | 1    | 0   | 0 |
| IPR021079      | 2    | 0    | 1    | 2.2 | 0 |
| TIGR00536      | 1    | 1    | 1    | 0   | 0 |
| IPR019070      | 1    | 0    | 1    | 0   | 0 |
| IPR019076      | 2.72 | 0    | 2.72 | 0   | 0 |
| IPR021699      | 2.5  | 0    | 2.5  | 0   | 0 |
| IPR021693      | 1.29 | 0    | 1.29 | 0   | 0 |
| IPR021690      | 1    | 0    | 1    | 0   | 0 |
| IPR021696      | 2.53 | 0    | 2.53 | 0   | 0 |
| IPR021697      | 1.36 | 0    | 1.36 | 0   | 0 |
| IPR021694      | 1    | 0    | 1    | 0   | 0 |
| IPR021695      | 1.14 | 0    | 1.14 | 0   | 0 |
| IPR005629      | 2.09 | 2.12 | 1    | 0   | 0 |
| IPR005627      | 1.09 | 1.19 | 1.07 | 0   | 0 |
| IPR005623      | 1.13 | 1    | 1.13 | 0   | 0 |
| PTHR17388      | 2.2  | 2.2  | 0    | 0   | 0 |
| PTHR17384      | 2.22 | 2.22 | 0    | 0   | 0 |
| IPR014628      | 1    | 0    | 1    | 0   | 0 |
| PF05855        | 1    | 0    | 1    | 0   | 0 |
| PF05857        | 1.32 | 0    | 1.32 | 0   | 0 |
| PTHR11063      | 1    | 1    | 1    | 0   | 0 |
| PTHR11065      | 1.08 | 0    | 1.08 | 1.1 | 0 |
| PD052088       | 1    | 0    | 1    | 0   | 0 |
| MF_00311       | 1    | 0    | 1    | 1   | 0 |
| PTHR10281:SF1  | 1.66 | 1.66 | 0    | 0   | 0 |
| PF10856        | 1.83 | 1.83 | 0    | 0   | 0 |
| IPR004235      | 1.53 | 1.69 | 1    | 0   | 0 |
| IPR004232      | 1.47 | 2    | 1.47 | 0   | 0 |
| IPR004239      | 8.67 | 0    | 8.67 | 0   | 0 |
| PTHR16244      | 1.8  | 1.8  | 0    | 0   | 0 |
| TIGR01918      | 2    | 0    | 2    | 0   | 0 |
| PD177690       | 1    | 0    | 1    | 0   | 0 |
| PTHR13036      | 1.05 | 1.05 | 0    | 0   | 0 |
| IPR008003      | 1    | 0    | 1    | 1   | 0 |
| IPR008001      | 5.75 | 5.75 | 0    | 0   | 0 |
| IPR008004      | 9.83 | 9.83 | 0    | 0   | 0 |
| PF10074        | 2.5  | 0    | 2.5  | 0   | 0 |
| TIGR03426      | 1    | 0    | 1    | 0   | 0 |
| TIGR03427      | 1    | 0    | 1    | 0   | 0 |
| TIGR03420      | 1    | 0    | 1    | 0   | 0 |
| PTHR23163      | 1.44 | 1.44 | 0    | 0   | 0 |
| PTHR23162      | 3.25 | 3.25 | 0    | 0   | 0 |
| IPR009682      | 1.83 | 0    | 1.83 | 0   | 0 |
| IPR009680      | 1.09 | 0    | 1.09 | 0   | 0 |
| TIGR02774      | 1    | 0    | 1    | 0   | 0 |
| TIGR02773      | 1    | 0    | 1    | 0   | 0 |
| PTHR21497:SF6  | 1.09 | 1.09 | 0    | 0   | 0 |
| TIGR02484      | 1.08 | 0    | 1.08 | 0   | 0 |
| IPR016683      | 1    | 0    | 1    | 0   | 0 |
| IPR003359      | 1.25 | 2.33 | 1    | 0   | 0 |
| IPR007290      | 1.25 | 1.25 | 0    | 0   | 0 |
| IPR013348      | 1    | 0    | 1    | 0   | 0 |
| PTHR11260:SF1  | 1.52 | 1.52 | 0    | 0   | 0 |
| IPR000117      | 1.43 | 1.43 | 0    | 0   | 0 |
| IPR001863      | 4.04 | 4.04 | 0    | 0   | 0 |
| IPR001869      | 1.86 | 0    | 1.86 | 0   | 0 |

|                |      |      |      |      |   |
|----------------|------|------|------|------|---|
| PTHR16088      | 2    | 2    | 0    | 0    | 0 |
| IPR009731      | 1.46 | 0    | 1.46 | 0    | 0 |
| PTHR23202:SF3  | 1    | 1    | 0    | 0    | 0 |
| PTHR21136:SF2  | 1    | 1    | 0    | 0    | 0 |
| IPR009198      | 1    | 0    | 0    | 1    | 0 |
| IPR009192      | 1.11 | 0    | 1.11 | 0    | 0 |
| IPR009191      | 1.12 | 0    | 1.12 | 0    | 0 |
| IPR015038      | 1.02 | 0    | 1.02 | 0    | 0 |
| IPR015034      | 1.12 | 1.17 | 0    | 1    | 0 |
| IPR015037      | 1    | 0    | 1    | 0    | 0 |
| IPR002743      | 1.42 | 0    | 1.4  | 1.54 | 0 |
| IPR019552      | 12.5 | 12.5 | 0    | 0    | 0 |
| IPR002746      | 1    | 0    | 1    | 1    | 0 |
| IPR019550      | 1.62 | 1.62 | 0    | 0    | 0 |
| IPR002749      | 1.38 | 0    | 0    | 1.38 | 0 |
| IPR003507      | 1.39 | 1.67 | 1.39 | 1    | 0 |
| PTHR10271      | 4.29 | 4.29 | 0    | 0    | 0 |
| IPR003832      | 1.44 | 6.11 | 1.05 | 0    | 0 |
| IPR003831      | 1    | 0    | 1    | 1    | 0 |
| PTHR14594      | 2    | 2    | 0    | 0    | 0 |
| PD182582       | 1    | 0    | 1    | 0    | 0 |
| PD178246       | 1    | 0    | 1    | 0    | 0 |
| IPR016787      | 1.08 | 0    | 1.08 | 0    | 0 |
| IPR016785      | 1.06 | 0    | 1.06 | 0    | 0 |
| IPR016780      | 1    | 0    | 1    | 0    | 0 |
| IPR016781      | 1.04 | 0    | 1.04 | 0    | 0 |
| IPR014875      | 1.41 | 0    | 1.41 | 0    | 0 |
| IPR014871      | 1.19 | 2    | 1.18 | 1    | 0 |
| PTHR23317:SF27 | 1    | 1    | 0    | 0    | 0 |
| PTHR15913      | 2    | 2    | 0    | 0    | 0 |
| IPR007358      | 1.13 | 0    | 1.13 | 0    | 0 |
| PTHR23304:SF76 | 5.3  | 5.3  | 0    | 0    | 0 |
| IPR000879      | 2.75 | 2.75 | 0    | 0    | 0 |
| PTHR21851      | 1.18 | 1.18 | 0    | 0    | 0 |
| PD117176       | 1    | 0    | 1    | 0    | 0 |
| IPR015305      | 1.6  | 0    | 1.6  | 0    | 0 |
| PD137583       | 1.11 | 1.11 | 0    | 0    | 0 |
| PD566665       | 1.09 | 0    | 1.09 | 0    | 0 |
| PTHR20892      | 1    | 1    | 0    | 0    | 0 |
| PTHR20898      | 2    | 2    | 0    | 0    | 0 |
| TIGR00384      | 1.22 | 1.15 | 1.23 | 1    | 0 |
| PTHR22133      | 1.8  | 1.8  | 0    | 0    | 0 |
| PTHR23422:SF1  | 1    | 0    | 1    | 0    | 0 |
| IPR021403      | 1    | 0    | 1    | 0    | 0 |
| IPR021402      | 1.05 | 0    | 1.05 | 0    | 0 |
| IPR021401      | 1.41 | 0    | 1.41 | 0    | 0 |
| IPR021407      | 1    | 0    | 1    | 0    | 0 |
| IPR021408      | 1.05 | 0    | 1.05 | 0    | 0 |
| IPR022174      | 6.29 | 6.29 | 0    | 0    | 0 |
| PTHR22796      | 2.33 | 2.33 | 0    | 0    | 0 |
| TIGR02521      | 1    | 0    | 1    | 0    | 0 |
| PTHR12984:SF3  | 1.14 | 1.14 | 0    | 0    | 0 |
| PF06312        | 6    | 6    | 0    | 0    | 0 |
| IPR007828      | 1.38 | 1.46 | 1    | 0    | 0 |
| IPR007825      | 4.14 | 0    | 4.14 | 0    | 0 |
| IPR007820      | 1.15 | 1    | 1.16 | 0    | 0 |
| IPR011846      | 1.02 | 0    | 1.02 | 0    | 0 |
| IPR006441      | 1.31 | 0    | 1.31 | 0    | 0 |
| MF_01435       | 1.02 | 0    | 1.02 | 0    | 0 |
| PTHR12106:SF6  | 3    | 3    | 0    | 0    | 0 |
| PTHR15953      | 1.25 | 1.25 | 0    | 0    | 0 |
| IPR003679      | 1.19 | 0    | 1.2  | 1    | 0 |
| IPR003674      | 1.62 | 1.79 | 1.17 | 1.59 | 0 |
| IPR018897      | 1    | 0    | 1    | 0    | 0 |
| IPR000096      | 2.1  | 2.19 | 1    | 0    | 0 |
| IPR021362      | 1.14 | 0    | 1.14 | 0    | 0 |
| IPR021363      | 1    | 0    | 1    | 0    | 0 |
| IPR021361      | 1.1  | 0    | 1.1  | 0    | 0 |
| IPR021364      | 1.17 | 0    | 1.17 | 0    | 0 |



|               |      |      |      |      |   |
|---------------|------|------|------|------|---|
| IPR021365     | 1    | 0    | 1    | 0    | 0 |
| IPR008693     | 7.05 | 0    | 7.05 | 0    | 0 |
| IPR008690     | 1    | 0    | 0    | 1    | 0 |
| PD023267      | 1    | 0    | 1    | 0    | 0 |
| PF06069       | 1.67 | 1    | 1.7  | 0    | 0 |
| PTHR13622:SF2 | 1.07 | 1.12 | 1    | 0    | 0 |
| IPR016908     | 1    | 0    | 1    | 0    | 0 |
| PTHR23133:SF3 | 1.06 | 0    | 1.06 | 1    | 0 |
| PTHR21249:SF2 | 1.75 | 1.75 | 0    | 0    | 0 |
| PTHR21249:SF1 | 1.18 | 1.18 | 0    | 0    | 0 |
| PTHR15904:SF1 | 3.67 | 3.67 | 0    | 0    | 0 |
| PF11599       | 1    | 0    | 1    | 0    | 0 |
| PTHR13020:SF4 | 1    | 1    | 0    | 0    | 0 |
| IPR006830     | 1    | 0    | 1    | 0    | 0 |
| IPR006833     | 1.6  | 0    | 1.75 | 1    | 0 |
| IPR010160     | 1.02 | 0    | 1.03 | 1    | 0 |
| IPR016571     | 1.04 | 0    | 1.04 | 0    | 0 |
| IPR016572     | 1.31 | 0    | 1.31 | 0    | 0 |
| IPR016575     | 1.8  | 1.8  | 0    | 0    | 0 |
| IPR016574     | 1.12 | 1.12 | 0    | 0    | 0 |
| IPR016576     | 1.12 | 1.12 | 0    | 0    | 0 |
| PF10965       | 1.05 | 0    | 1.05 | 0    | 0 |
| PF10963       | 1.08 | 0    | 1.08 | 0    | 0 |
| PF10962       | 1.05 | 0    | 1.05 | 0    | 0 |
| PF10960       | 1.84 | 0    | 1.84 | 0    | 0 |
| PF10969       | 1    | 0    | 1    | 0    | 0 |
| PF10968       | 1    | 0    | 1    | 0    | 0 |
| PF07360       | 1.25 | 0    | 1.25 | 0    | 0 |
| PF09712       | 1.04 | 0    | 1.04 | 1    | 0 |
| PTHR20915     | 2.3  | 2.3  | 0    | 0    | 0 |
| TIGR00028     | 1.75 | 0    | 1.75 | 0    | 0 |
| IPR004995     | 5.91 | 0    | 5.91 | 0    | 0 |
| TIGR02889     | 1    | 0    | 1    | 0    | 0 |
| IPR021612     | 2.6  | 1    | 2.71 | 0    | 0 |
| IPR021610     | 1    | 1    | 1    | 0    | 0 |
| IPR021616     | 1    | 0    | 1    | 0    | 0 |
| IPR021617     | 2.23 | 0    | 2.23 | 0    | 0 |
| TIGR03044     | 1    | 0    | 1    | 0    | 0 |
| TIGR03042     | 1    | 0    | 1    | 0    | 0 |
| PD191301      | 1    | 0    | 1    | 0    | 0 |
| PTHR21635     | 1.43 | 1.43 | 0    | 0    | 0 |
| PTHR21632     | 1.14 | 1.14 | 0    | 0    | 0 |
| IPR018741     | 1.01 | 0    | 1.01 | 0    | 0 |
| IPR018747     | 1.69 | 0    | 0    | 1.69 | 0 |
| TIGR02318     | 1    | 0    | 1    | 0    | 0 |
| PD201674      | 1    | 0    | 1    | 0    | 0 |
| IPR010368     | 1.36 | 0    | 1.34 | 2    | 0 |
| IPR010364     | 1.02 | 0    | 1.02 | 0    | 0 |
| IPR010365     | 2.1  | 0    | 2.1  | 0    | 0 |
| IPR010360     | 1.05 | 0    | 1.05 | 0    | 0 |
| IPR006760     | 1.73 | 1.73 | 0    | 0    | 0 |
| IPR006765     | 1.6  | 0    | 1.6  | 0    | 0 |
| IPR006764     | 6.81 | 0    | 6.81 | 0    | 0 |
| IPR003199     | 1.38 | 3    | 1.29 | 1    | 0 |
| IPR003197     | 1.39 | 1.39 | 0    | 0    | 0 |
| PTHR19229     | 2    | 2.33 | 1    | 0    | 0 |
| IPR016003     | 1    | 0    | 1    | 0    | 0 |
| IPR003739     | 1    | 0    | 1    | 1    | 0 |
| IPR003738     | 1.48 | 1.12 | 1.55 | 1.12 | 0 |
| MF_00538      | 1    | 0    | 1    | 0    | 0 |
| PTHR15919:SF5 | 2.67 | 2.67 | 0    | 0    | 0 |
| PTHR19919     | 1.5  | 1.5  | 0    | 0    | 0 |
| PTHR11494:SF6 | 1.4  | 1.4  | 0    | 0    | 0 |
| IPR015724     | 1.67 | 1.8  | 1.5  | 0    | 0 |
| IPR009684     | 1.5  | 1.5  | 0    | 0    | 0 |
| IPR002452     | 1    | 1    | 0    | 0    | 0 |
| IPR009355     | 1.18 | 0    | 1.18 | 0    | 0 |
| IPR009354     | 1.13 | 0    | 1.13 | 0    | 0 |
| IPR009351     | 1.22 | 0    | 1.21 | 3    | 0 |

|                |      |      |      |      |   |
|----------------|------|------|------|------|---|
| IPR009350      | 1.96 | 0    | 1.96 | 0    | 0 |
| PTHR23202:SF6  | 1    | 1    | 0    | 0    | 0 |
| PTHR23251      | 1.75 | 1.75 | 0    | 0    | 0 |
| IPR014540      | 1    | 0    | 1    | 0    | 0 |
| IPR014541      | 1.02 | 0    | 1.02 | 0    | 0 |
| IPR014548      | 1    | 0    | 1    | 0    | 0 |
| IPR010649      | 1.23 | 0    | 1.23 | 0    | 0 |
| IPR010646      | 1.07 | 0    | 1.07 | 0    | 0 |
| IPR017018      | 1.11 | 0    | 1.11 | 0    | 0 |
| IPR017013      | 1    | 0    | 0    | 1    | 0 |
| IPR017012      | 1    | 0    | 1    | 0    | 0 |
| IPR017015      | 1    | 0    | 1    | 0    | 0 |
| IPR017016      | 1    | 0    | 1    | 0    | 0 |
| PD031251       | 1.13 | 0    | 1.13 | 0    | 0 |
| PTHR12289:SF17 | 1.44 | 1.8  | 1    | 0    | 0 |
| PTHR12289:SF11 | 1.33 | 1.33 | 0    | 0    | 0 |
| PTHR21345      | 1.71 | 1.71 | 0    | 0    | 0 |
| PTHR21343      | 1.27 | 2.5  | 1.08 | 1    | 0 |
| PTHR10074:SF29 | 1.08 | 1.33 | 1    | 0    | 0 |
| PTHR10074:SF28 | 1    | 0    | 1    | 0    | 0 |
| PTHR21968      | 1.15 | 1.15 | 0    | 0    | 0 |
| TIGR02466      | 1.14 | 0    | 1.14 | 0    | 0 |
| IPR007162      | 1    | 0    | 1    | 1    | 0 |
| IPR007163      | 1.05 | 0    | 1.05 | 1    | 0 |
| IPR007169      | 1.1  | 0    | 1.1  | 0    | 0 |
| PD053432       | 1    | 0    | 1    | 0    | 0 |
| IPR001573      | 4.6  | 4.6  | 0    | 0    | 0 |
| IPR021137      | 1.03 | 1.61 | 1.02 | 0    | 0 |
| PTHR22083      | 1.08 | 1.08 | 0    | 0    | 0 |
| PTHR13236      | 1.33 | 1.33 | 0    | 0    | 0 |
| PTHR13231      | 1.1  | 1.1  | 0    | 0    | 0 |
| IPR019620      | 1.03 | 0    | 1.03 | 0    | 0 |
| IPR019621      | 1.04 | 0    | 1.04 | 0    | 0 |
| IPR021795      | 2.91 | 0    | 2.91 | 0    | 0 |
| IPR021794      | 1.25 | 0    | 1.25 | 0    | 0 |
| IPR021793      | 1    | 0    | 1    | 0    | 0 |
| IPR021791      | 1.32 | 0    | 1.32 | 0    | 0 |
| IPR008243      | 1.03 | 0    | 1.03 | 0    | 0 |
| IPR008249      | 1.03 | 0    | 1.03 | 0    | 0 |
| IPR009112      | 1.67 | 1.67 | 0    | 0    | 0 |
| PTHR21095      | 1.24 | 1.24 | 1    | 0    | 0 |
| IPR011751      | 4    | 0    | 4    | 0    | 0 |
| IPR011754      | 4    | 0    | 4    | 0    | 0 |
| IPR018860      | 1.08 | 1.08 | 0    | 0    | 0 |
| IPR009808      | 1.67 | 0    | 1.67 | 0    | 0 |
| IPR009806      | 2    | 2    | 0    | 0    | 0 |
| IPR007405      | 1.07 | 0    | 1.07 | 0    | 0 |
| IPR016709      | 1.55 | 1    | 1.56 | 0    | 0 |
| PD750912       | 1.05 | 1.05 | 0    | 0    | 0 |
| IPR016705      | 1    | 1    | 1    | 0    | 0 |
| IPR016703      | 1.14 | 0    | 1.14 | 0    | 0 |
| PD052277       | 1    | 0    | 1    | 0    | 0 |
| PD108804       | 1    | 0    | 1    | 0    | 0 |
| IPR007285      | 5.57 | 0    | 5.57 | 0    | 0 |
| PTHR22192:SF1  | 1.67 | 1.67 | 0    | 0    | 0 |
| PTHR13177      | 1.37 | 1.37 | 0    | 0    | 0 |
| IPR008764      | 1.09 | 0    | 1.09 | 0    | 0 |
| IPR004461      | 1.21 | 0    | 1.25 | 1.15 | 0 |
| PF10488        | 1.58 | 1.58 | 0    | 0    | 0 |
| PF10484        | 1.25 | 1.25 | 0    | 0    | 0 |
| PF10734        | 1.31 | 0    | 1.31 | 0    | 0 |
| PTHR11695:SF31 | 1    | 1    | 1    | 0    | 0 |
| PTHR10499:SF40 | 1.62 | 1.62 | 0    | 0    | 0 |
| PTHR21533:SF13 | 2.2  | 2.5  | 0    | 1    | 0 |
| IPR003544      | 1.08 | 1.29 | 1.07 | 1    | 0 |
| MF_01519       | 1    | 0    | 1    | 0    | 0 |
| IPR007390      | 1.1  | 0    | 1.08 | 2    | 0 |
| PTHR10340:SF14 | 1    | 1    | 0    | 0    | 0 |
| IPR016989      | 1    | 0    | 1    | 0    | 0 |

|                |      |      |      |   |   |
|----------------|------|------|------|---|---|
| IPR012609      | 1.1  | 2    | 1    | 0 | 0 |
| IPR012608      | 1.8  | 1.8  | 0    | 0 | 0 |
| IPR016980      | 1.2  | 0    | 1.2  | 0 | 0 |
| IPR012602      | 1    | 0    | 1    | 0 | 0 |
| IPR012607      | 1.03 | 0    | 1.03 | 0 | 0 |
| IPR016986      | 1.17 | 0    | 1.17 | 0 | 0 |
| IPR016892      | 1    | 0    | 1    | 0 | 0 |
| IPR012574      | 1.75 | 1.75 | 0    | 0 | 0 |
| PF06352        | 1.54 | 0    | 1.54 | 0 | 0 |
| IPR016891      | 1    | 0    | 1    | 0 | 0 |
| PF06354        | 1.13 | 0    | 1.14 | 1 | 0 |
| IPR012571      | 1.24 | 1.24 | 0    | 0 | 0 |
| PTHR13371      | 1.26 | 1.26 | 0    | 0 | 0 |
| IPR019185      | 1.15 | 1.15 | 0    | 0 | 0 |
| IPR001058      | 3.45 | 3.45 | 0    | 0 | 0 |
| IPR018859      | 1.21 | 1.21 | 0    | 0 | 0 |
| IPR004668      | 1.81 | 1    | 1.81 | 0 | 0 |
| IPR018854      | 2    | 2    | 0    | 0 | 0 |
| IPR018855      | 1    | 1    | 0    | 0 | 0 |
| PTHR18964:SF22 | 1    | 0    | 1    | 0 | 0 |
| IPR018580      | 1.35 | 0    | 1.34 | 2 | 0 |
| IPR018581      | 1    | 0    | 1    | 0 | 0 |
| IPR002084      | 1.02 | 0    | 1.02 | 0 | 0 |
| IPR010479      | 2    | 2    | 0    | 0 | 0 |
| IPR010476      | 1.08 | 0    | 1.08 | 0 | 0 |
| IPR010475      | 1.41 | 1.41 | 0    | 0 | 0 |
| IPR013095      | 1    | 0    | 1    | 0 | 0 |
| PTHR11845      | 1.04 | 1.09 | 1.02 | 1 | 0 |
| IPR003443      | 4    | 4    | 0    | 0 | 0 |
| IPR014938      | 1    | 0    | 1    | 0 | 0 |
| IPR010296      | 1.86 | 1    | 1.89 | 0 | 0 |
| PTHR14728      | 1.39 | 1.39 | 0    | 0 | 0 |
| MF_01170       | 1    | 0    | 1    | 0 | 0 |
| IPR013921      | 1.15 | 1.15 | 0    | 0 | 0 |
| PF11079        | 1.11 | 0    | 1.11 | 0 | 0 |
| PTHR12761      | 1.5  | 1.5  | 0    | 0 | 0 |
| PTHR12760      | 1.29 | 1.29 | 0    | 0 | 0 |
| PTHR23197:SF1  | 1    | 1    | 0    | 0 | 0 |
| PTHR23197:SF4  | 1.15 | 1.15 | 0    | 0 | 0 |
| IPR009801      | 1.35 | 1.35 | 0    | 0 | 0 |
| IPR009802      | 3    | 0    | 3    | 0 | 0 |
| PTHR20991      | 1.18 | 1.18 | 0    | 0 | 0 |
| PTHR20999      | 1    | 1    | 0    | 0 | 0 |
| IPR002778      | 1.12 | 1.19 | 0    | 1 | 0 |
| IPR020258      | 1.38 | 0    | 1.38 | 0 | 0 |
| IPR020255      | 1    | 0    | 1    | 0 | 0 |
| IPR020254      | 1    | 0    | 1    | 0 | 0 |
| IPR020256      | 1.04 | 0    | 1.04 | 0 | 0 |
| IPR020251      | 1.03 | 0    | 1.03 | 0 | 0 |
| TIGR03518      | 1    | 0    | 1    | 0 | 0 |
| TIGR03510      | 1.25 | 0    | 1.26 | 1 | 0 |
| TIGR03511      | 1    | 0    | 1    | 0 | 0 |
| TIGR03512      | 1    | 0    | 1    | 0 | 0 |
| TIGR03513      | 1    | 1    | 1    | 0 | 0 |
| TIGR03515      | 1    | 0    | 1    | 0 | 0 |
| TIGR03517      | 1    | 0    | 1    | 0 | 0 |
| IPR008444      | 1    | 0    | 1    | 0 | 0 |
| IPR016706      | 1.22 | 1.22 | 0    | 0 | 0 |
| TIGR00725      | 1    | 0    | 1    | 0 | 0 |
| IPR015673      | 1.67 | 1.67 | 0    | 0 | 0 |
| MF_01372       | 1    | 0    | 1    | 0 | 0 |
| IPR010900      | 1    | 0    | 1    | 0 | 0 |
| PTHR22973:SF3  | 1.2  | 1.2  | 0    | 0 | 0 |
| IPR007054      | 2.52 | 0    | 2.52 | 0 | 0 |
| IPR021088      | 1.38 | 1.38 | 0    | 0 | 0 |
| IPR021082      | 1    | 1    | 0    | 0 | 0 |
| IPR021080      | 1    | 0    | 1    | 0 | 0 |
| IPR021555      | 1    | 0    | 1    | 0 | 0 |
| IPR021556      | 1.34 | 0    | 1.34 | 0 | 0 |

|               |      |      |      |      |   |
|---------------|------|------|------|------|---|
| IPR021551     | 1.55 | 0    | 1.55 | 0    | 0 |
| IPR021550     | 1    | 0    | 1    | 0    | 0 |
| IPR021553     | 1.02 | 0    | 1.02 | 0    | 0 |
| IPR021558     | 1.2  | 0    | 1.2  | 0    | 0 |
| IPR003828     | 1.03 | 1    | 1.03 | 0    | 0 |
| TIGR02830     | 1    | 0    | 1    | 0    | 0 |
| IPR005186     | 1.05 | 0    | 1.05 | 0    | 0 |
| IPR009603     | 31   | 31   | 0    | 0    | 0 |
| IPR009609     | 1.04 | 0    | 1.04 | 1    | 0 |
| PF12318       | 1.38 | 1    | 1.39 | 0    | 0 |
| PF02642       | 1.01 | 0    | 1.01 | 1    | 0 |
| PF11657       | 1.1  | 0    | 1.1  | 0    | 0 |
| PF11655       | 1.83 | 0    | 1.83 | 0    | 0 |
| PTHR22691:SF1 | 1.11 | 1.11 | 0    | 0    | 0 |
| IPR011199     | 1.06 | 0    | 1.06 | 0    | 0 |
| IPR011194     | 1    | 0    | 1    | 0    | 0 |
| PTHR13650     | 1.3  | 1.3  | 0    | 0    | 0 |
| PTHR13651     | 1.1  | 1.1  | 0    | 0    | 0 |
| IPR018707     | 1.12 | 0    | 1.12 | 0    | 0 |
| IPR018700     | 1    | 0    | 0    | 1    | 0 |
| IPR018701     | 1.09 | 0    | 1.5  | 1    | 0 |
| PTHR14684     | 1    | 1    | 0    | 0    | 0 |
| PTHR14689     | 1.25 | 1.25 | 0    | 0    | 0 |
| PTHR15377     | 1    | 1    | 0    | 0    | 0 |
| IPR007933     | 1.41 | 0    | 1.41 | 0    | 0 |
| PTHR12686     | 1    | 1    | 0    | 1    | 0 |
| PTHR12681     | 1.08 | 1.08 | 0    | 0    | 0 |
| IPR016790     | 1.04 | 0    | 1.04 | 0    | 0 |
| IPR017098     | 1    | 0    | 0    | 1    | 0 |
| PF10882       | 1.04 | 0    | 1.04 | 1    | 0 |
| PF11133       | 1.1  | 0    | 1.1  | 0    | 0 |
| PF11132       | 1.4  | 0    | 1.4  | 0    | 0 |
| TIGR02684     | 1.26 | 0    | 1.26 | 0    | 0 |
| IPR020117     | 1.06 | 0    | 1.06 | 0    | 0 |
| PTHR10668:SF4 | 1.25 | 1    | 1.29 | 0    | 0 |
| PD415499      | 1    | 0    | 1    | 0    | 0 |
| TIGR03495     | 1.07 | 0    | 1.07 | 0    | 0 |
| TIGR03490     | 1.2  | 0    | 1.2  | 0    | 0 |
| TIGR03493     | 1.2  | 0    | 1.2  | 0    | 0 |
| TIGR03492     | 1.64 | 0    | 1.64 | 0    | 0 |
| PTHR16284:SF1 | 1.1  | 1.1  | 0    | 0    | 0 |
| PTHR16284:SF3 | 1.27 | 1.27 | 0    | 0    | 0 |
| IPR019592     | 1.02 | 0    | 1.02 | 0    | 0 |
| TIGR02451     | 1.02 | 0    | 1.02 | 0    | 0 |
| TIGR02455     | 1    | 0    | 1    | 0    | 0 |
| PTHR21065     | 1.07 | 1.07 | 0    | 0    | 0 |
| PTHR12830:SF8 | 2.22 | 2.22 | 0    | 0    | 0 |
| PTHR12830:SF4 | 1.25 | 1.25 | 0    | 0    | 0 |
| PTHR12830:SF3 | 1    | 1    | 0    | 0    | 0 |
| PTHR12830:SF1 | 1.33 | 1.36 | 1    | 0    | 0 |
| IPR009883     | 1.01 | 0    | 1.01 | 0    | 0 |
| IPR009885     | 1.03 | 0    | 1.03 | 0    | 0 |
| IPR009889     | 1.67 | 1.67 | 0    | 0    | 0 |
| IPR009888     | 1    | 0    | 1    | 0    | 0 |
| IPR008767     | 1.15 | 0    | 1.15 | 0    | 0 |
| IPR010001     | 1.06 | 0    | 1.03 | 1.2  | 0 |
| IPR010006     | 1.44 | 0    | 1.44 | 0    | 0 |
| IPR010005     | 1.38 | 0    | 1.38 | 0    | 0 |
| IPR010008     | 1.17 | 0    | 1.17 | 0    | 0 |
| IPR008761     | 1.18 | 0    | 1.18 | 0    | 0 |
| MF_01506      | 1    | 0    | 1    | 0    | 0 |
| PF09647       | 1    | 0    | 1    | 0    | 0 |
| IPR016420     | 1    | 0    | 1    | 0    | 0 |
| IPR007485     | 1.02 | 1    | 1.02 | 0    | 0 |
| IPR017257     | 1    | 0    | 1    | 0    | 0 |
| IPR017259     | 1    | 0    | 1    | 0    | 0 |
| IPR003477     | 1.79 | 0    | 1.81 | 1.36 | 0 |
| PF06845       | 1.1  | 0    | 1.1  | 0    | 0 |
| IPR008450     | 1.2  | 1.2  | 0    | 0    | 0 |

|               |      |      |      |      |   |
|---------------|------|------|------|------|---|
| IPR004174     | 1.48 | 0    | 1.48 | 0    | 0 |
| IPR004171     | 2.36 | 2.36 | 0    | 0    | 0 |
| PF06264       | 1.35 | 1    | 1.36 | 0    | 0 |
| PF06263       | 1.61 | 0    | 1.61 | 0    | 0 |
| PTHR13948:SF4 | 2    | 2    | 0    | 0    | 0 |
| IPR005220     | 1.53 | 0    | 1.53 | 0    | 0 |
| IPR005227     | 1    | 1    | 1    | 0    | 0 |
| IPR002795     | 1.05 | 0    | 1.06 | 1.04 | 0 |
| IPR009414     | 1.06 | 0    | 1.06 | 0    | 0 |
| IPR009413     | 1.5  | 1.69 | 1    | 0    | 0 |
| IPR014198     | 1.02 | 0    | 1.02 | 0    | 0 |
| PF12127       | 1    | 0    | 1    | 0    | 0 |
| IPR006940     | 1.69 | 1.69 | 0    | 0    | 0 |
| IPR006942     | 1.38 | 1.38 | 0    | 0    | 0 |
| IPR010765     | 1.47 | 2.44 | 1.22 | 0    | 0 |
| PTHR15286:SF1 | 1.71 | 1.71 | 0    | 0    | 0 |
| PTHR12472     | 1.17 | 1.17 | 0    | 0    | 0 |
| PTHR12475     | 1.23 | 1.36 | 1    | 0    | 0 |
| IPR005618     | 1.57 | 1    | 1.57 | 0    | 0 |
| PTHR14304:SF5 | 1.2  | 1.2  | 0    | 0    | 0 |
| PTHR21264     | 1.55 | 1.55 | 0    | 0    | 0 |
| PTHR21260     | 1    | 1    | 0    | 0    | 0 |
| PTHR22455:SF8 | 2.41 | 2.41 | 0    | 0    | 0 |
| IPR020368     | 1.02 | 0    | 1.02 | 0    | 0 |
| IPR020360     | 1    | 0    | 1    | 0    | 0 |
| IPR020362     | 1    | 1    | 1    | 0    | 0 |
| IPR020364     | 1    | 0    | 0    | 1    | 0 |
| PF09035       | 1.21 | 0    | 1.21 | 0    | 0 |
| IPR001323     | 2.31 | 2.31 | 0    | 0    | 0 |
| IPR001325     | 3.5  | 3.5  | 0    | 0    | 0 |
| IPR012138     | 1.33 | 0    | 1.33 | 0    | 0 |
| IPR012134     | 1    | 0    | 1    | 0    | 0 |
| PTHR14269:SF3 | 1    | 1    | 1    | 0    | 0 |
| IPR021907     | 3.78 | 0    | 3.78 | 0    | 0 |
| IPR021902     | 10   | 0    | 10   | 0    | 0 |
| IPR021903     | 1.12 | 0    | 1.12 | 0    | 0 |
| IPR009259     | 1.33 | 1.33 | 0    | 0    | 0 |
| IPR009251     | 1.8  | 0    | 1.8  | 0    | 0 |
| IPR009252     | 1.04 | 0    | 1.02 | 1.33 | 0 |
| IPR009253     | 1.72 | 0    | 1.72 | 0    | 0 |
| IPR009256     | 1    | 0    | 1    | 0    | 0 |
| IPR011566     | 1.06 | 1.15 | 1.03 | 0    | 0 |
| IPR002000     | 3.56 | 3.56 | 0    | 0    | 0 |
| IPR002003     | 2.67 | 0    | 2.67 | 0    | 0 |
| IPR009929     | 1.1  | 1.5  | 1.06 | 0    | 0 |
| IPR009922     | 1.42 | 0    | 1.42 | 0    | 0 |
| IPR009923     | 1.16 | 0    | 1.15 | 1.17 | 0 |
| IPR009921     | 2.01 | 0    | 2.01 | 0    | 0 |
| IPR009927     | 1.06 | 0    | 1    | 1.06 | 0 |
| IPR009925     | 3.25 | 0    | 3.25 | 0    | 0 |
| IPR014424     | 1    | 0    | 0    | 1    | 0 |
| IPR014426     | 1    | 0    | 0    | 1    | 0 |
| IPR007563     | 1.12 | 0    | 1.12 | 1    | 0 |
| IPR007564     | 1.3  | 0    | 0    | 1.3  | 0 |
| IPR017199     | 1    | 0    | 1    | 1    | 0 |
| IPR017196     | 1.14 | 0    | 1.14 | 0    | 0 |
| IPR002918     | 1.96 | 4    | 1.68 | 1    | 0 |
| IPR000511     | 1.76 | 1.76 | 0    | 0    | 0 |
| IPR000518     | 1.07 | 0    | 1.07 | 0    | 0 |
| PD297513      | 1.8  | 1.8  | 0    | 0    | 0 |
| PTHR15453     | 1.8  | 1.8  | 0    | 0    | 0 |
| PF07307       | 1.02 | 0    | 1.02 | 0    | 0 |
| TIGR01685     | 1.12 | 1.12 | 0    | 1    | 0 |
| IPR005076     | 4.15 | 5.56 | 1    | 0    | 0 |
| PD053072      | 1    | 0    | 1    | 0    | 0 |
| PTHR14195     | 3    | 3    | 0    | 0    | 0 |
| IPR008510     | 3.25 | 0    | 3.25 | 0    | 0 |
| IPR008516     | 2.33 | 2.33 | 0    | 0    | 0 |
| TIGR02642     | 1    | 0    | 1    | 0    | 0 |

|                |       |       |      |      |   |
|----------------|-------|-------|------|------|---|
| PTHR22458      | 1.2   | 1.2   | 0    | 0    | 0 |
| PTHR22455      | 1.17  | 1.17  | 0    | 0    | 0 |
| PTHR21186      | 1     | 1     | 0    | 0    | 0 |
| PTHR22980      | 1.13  | 1.13  | 0    | 0    | 0 |
| TIGR03276      | 1     | 0     | 1    | 0    | 0 |
| IPR003223      | 1.1   | 0     | 1.1  | 0    | 0 |
| IPR007761      | 1.42  | 0     | 1.42 | 0    | 0 |
| PTHR20884:SF2  | 1.14  | 1.14  | 0    | 0    | 0 |
| PTHR20884:SF3  | 3.75  | 4.14  | 1    | 0    | 0 |
| PTHR20884:SF4  | 1.12  | 1.12  | 0    | 0    | 0 |
| IPR000471      | 14.71 | 14.71 | 0    | 0    | 0 |
| IPR000758      | 3.11  | 0     | 3.11 | 0    | 0 |
| IPR021008      | 1     | 0     | 1    | 0    | 0 |
| PTHR13528      | 1.36  | 1.36  | 0    | 0    | 0 |
| IPR019718      | 1.09  | 0     | 1.09 | 0    | 0 |
| IPR019712      | 1.03  | 0     | 1.03 | 0    | 0 |
| IPR019713      | 1.02  | 0     | 1.02 | 0    | 0 |
| IPR015142      | 1.8   | 1.8   | 0    | 0    | 0 |
| IPR022064      | 1     | 0     | 1    | 0    | 0 |
| IPR022061      | 1.09  | 0     | 1.09 | 0    | 0 |
| IPR010532      | 1.45  | 1.25  | 1.11 | 1.89 | 0 |
| IPR010531      | 1.24  | 1.24  | 0    | 0    | 0 |
| IPR010530      | 3.88  | 3.88  | 0    | 0    | 0 |
| IPR010534      | 1.82  | 0     | 1.82 | 0    | 0 |
| IPR010398      | 1.02  | 0     | 1.02 | 0    | 0 |
| IPR010393      | 1.01  | 0     | 1.01 | 0    | 0 |
| PTHR11697:SF2  | 1.8   | 1.8   | 0    | 0    | 0 |
| IPR015492      | 1.2   | 1.2   | 0    | 0    | 0 |
| PF05809        | 1.23  | 1.23  | 0    | 0    | 0 |
| PF05802        | 1     | 0     | 1    | 0    | 0 |
| IPR016633      | 1.01  | 0     | 1.01 | 0    | 0 |
| IPR016630      | 1     | 0     | 1    | 0    | 0 |
| IPR016631      | 1     | 0     | 1    | 0    | 0 |
| IPR016634      | 1.28  | 1     | 1.28 | 0    | 0 |
| IPR016639      | 1.37  | 1.8   | 1.15 | 0    | 0 |
| IPR012823      | 1.08  | 2     | 1.08 | 0    | 0 |
| PF10809        | 1.14  | 0     | 1.14 | 0    | 0 |
| PF10804        | 1     | 0     | 1    | 0    | 0 |
| PF10805        | 1.09  | 0     | 1.09 | 0    | 0 |
| PF10801        | 1     | 0     | 1    | 0    | 0 |
| PF10802        | 3.25  | 0     | 0    | 3.25 | 0 |
| PTHR13952      | 1.12  | 1.12  | 0    | 0    | 0 |
| IPR004260      | 1     | 0     | 1    | 1    | 0 |
| IPR018908      | 1.15  | 1.17  | 1    | 0    | 0 |
| IPR018902      | 3.5   | 3.5   | 0    | 0    | 0 |
| IPR018900      | 1.03  | 0     | 1.03 | 0    | 0 |
| IPR018901      | 1.07  | 0     | 1.07 | 0    | 0 |
| IPR018904      | 1.33  | 1.33  | 0    | 0    | 0 |
| IPR020516      | 1.06  | 0     | 1.06 | 0    | 0 |
| IPR020517      | 1     | 0     | 1    | 0    | 0 |
| IPR020513      | 1.02  | 0     | 1.02 | 0    | 0 |
| IPR020510      | 1     | 0     | 1    | 0    | 0 |
| PTHR23287      | 1.14  | 1.14  | 0    | 0    | 0 |
| PF10020        | 1.19  | 0     | 1.19 | 0    | 0 |
| PTHR15597:SF1  | 1     | 1     | 0    | 0    | 0 |
| IPR004205      | 1.19  | 1.19  | 0    | 0    | 0 |
| IPR008581      | 5.5   | 5.5   | 0    | 0    | 0 |
| TIGR01110      | 1.04  | 0     | 1.04 | 0    | 0 |
| PTHR21573      | 1     | 1     | 0    | 0    | 0 |
| PTHR21570      | 1     | 1     | 0    | 0    | 0 |
| PTHR21397      | 1.7   | 1.7   | 0    | 0    | 0 |
| PTHR21394      | 1.57  | 1.57  | 0    | 0    | 0 |
| PD002844       | 1     | 0     | 1    | 0    | 0 |
| IPR007395      | 1.04  | 0     | 1.04 | 0    | 0 |
| MF_01583       | 1     | 0     | 1    | 0    | 0 |
| PD029828       | 1     | 0     | 1    | 0    | 0 |
| PTHR11662:SF30 | 1.4   | 1.4   | 0    | 0    | 0 |
| IPR007262      | 1.52  | 1.52  | 0    | 0    | 0 |
| PF08192        | 1.36  | 1.36  | 0    | 0    | 0 |

|               |       |      |       |      |   |
|---------------|-------|------|-------|------|---|
| IPR007264     | 1.06  | 1.09 | 0     | 1    | 0 |
| IPR013396     | 1.06  | 0    | 1.06  | 0    | 0 |
| IPR013394     | 1.8   | 0    | 1.8   | 0    | 0 |
| IPR013392     | 1.19  | 0    | 1.19  | 0    | 0 |
| IPR013393     | 1.12  | 0    | 1.12  | 0    | 0 |
| IPR013391     | 1.19  | 0    | 1.19  | 0    | 0 |
| IPR013398     | 1.07  | 1    | 1.07  | 0    | 0 |
| IPR013399     | 1.04  | 0    | 1.04  | 0    | 0 |
| IPR013640     | 1     | 1    | 0     | 0    | 0 |
| IPR014582     | 1.33  | 0    | 1.33  | 0    | 0 |
| IPR014583     | 1     | 0    | 1     | 0    | 0 |
| IPR021216     | 1.23  | 1.23 | 0     | 0    | 0 |
| IPR021218     | 1.02  | 0    | 1.02  | 0    | 0 |
| IPR004716     | 1.21  | 0    | 1.21  | 0    | 0 |
| IPR004714     | 1.07  | 0    | 1.07  | 0    | 0 |
| IPR016878     | 1.05  | 0    | 1.05  | 0    | 0 |
| IPR016877     | 1.06  | 0    | 1.06  | 0    | 0 |
| IPR012513     | 1.08  | 1.08 | 0     | 0    | 0 |
| IPR016873     | 1     | 0    | 1     | 0    | 0 |
| PD027639      | 1     | 0    | 1     | 0    | 0 |
| IPR009494     | 1.54  | 0    | 1.54  | 0    | 0 |
| IPR009495     | 1.42  | 0    | 1.42  | 0    | 0 |
| IPR009492     | 1.24  | 1    | 1.25  | 0    | 0 |
| IPR009491     | 1.1   | 0    | 1.1   | 0    | 0 |
| IPR019699     | 1     | 0    | 1     | 0    | 0 |
| IPR019698     | 1.02  | 0    | 1.02  | 0    | 0 |
| PTHR13287     | 1.25  | 1.25 | 0     | 0    | 0 |
| PF01908       | 1.82  | 0    | 1.6   | 1.87 | 0 |
| IPR019693     | 1.02  | 0    | 1.02  | 0    | 0 |
| IPR019695     | 1.02  | 0    | 1.02  | 0    | 0 |
| IPR019694     | 1.13  | 0    | 1.13  | 0    | 0 |
| PF01905       | 1.09  | 0    | 1     | 1.16 | 0 |
| IPR011092     | 1.3   | 0    | 1.3   | 0    | 0 |
| IPR002718     | 72.88 | 0    | 72.88 | 0    | 0 |
| IPR002712     | 1.24  | 0    | 1.24  | 0    | 0 |
| IPR019522     | 2     | 2    | 0     | 0    | 0 |
| IPR014118     | 1.54  | 0    | 1.54  | 0    | 0 |
| PTHR10229     | 1.14  | 1.25 | 1     | 0    | 0 |
| IPR000824     | 1.07  | 0    | 1.07  | 0    | 0 |
| IPR014806     | 1.14  | 1.14 | 0     | 0    | 0 |
| IPR014802     | 1     | 1    | 0     | 0    | 0 |
| IPR014801     | 1.12  | 1.12 | 0     | 0    | 0 |
| PTHR11337:SF7 | 1.5   | 1.5  | 0     | 0    | 0 |
| PTHR21800     | 1.33  | 1.33 | 0     | 0    | 0 |
| PTHR23110:SF3 | 1     | 1    | 0     | 0    | 0 |
| PTHR23023:SF1 | 1.45  | 1.29 | 1.59  | 0    | 0 |
| IPR020499     | 1     | 0    | 1     | 0    | 0 |
| IPR020493     | 1     | 0    | 1     | 0    | 0 |
| IPR020492     | 1     | 0    | 1     | 0    | 0 |
| IPR020490     | 1.02  | 0    | 1.02  | 0    | 0 |
| IPR020496     | 1     | 0    | 1     | 0    | 0 |
| TIGR01737     | 1     | 0    | 1     | 1    | 0 |
| IPR012605     | 1     | 0    | 1     | 0    | 0 |
| PTHR20863     | 1     | 1    | 1     | 0    | 0 |
| IPR016987     | 1     | 0    | 1     | 0    | 0 |
| PTHR20867     | 1.12  | 1.12 | 0     | 0    | 0 |
| PTHR20864     | 1.67  | 1.67 | 0     | 0    | 0 |
| TIGR03601     | 1.46  | 0    | 1.46  | 0    | 0 |
| TIGR03602     | 1.06  | 0    | 1.06  | 0    | 0 |
| TIGR03603     | 1     | 0    | 1     | 0    | 0 |
| PF06359       | 3.56  | 0    | 3.56  | 0    | 0 |
| PTHR22294     | 1.4   | 1.4  | 0     | 0    | 0 |
| IPR021450     | 1.13  | 0    | 1.11  | 1.5  | 0 |
| IPR021452     | 1     | 0    | 1     | 0    | 0 |
| IPR021453     | 2.06  | 0    | 2.06  | 0    | 0 |
| IPR021456     | 1     | 0    | 1     | 0    | 0 |
| IPR021457     | 1.18  | 2    | 1.18  | 0    | 0 |
| IPR018635     | 1.49  | 0    | 1.49  | 0    | 0 |
| IPR018636     | 1.07  | 0    | 1.07  | 0    | 0 |

|                |      |      |      |   |   |
|----------------|------|------|------|---|---|
| IPR018630      | 1.14 | 1.14 | 0    | 0 | 0 |
| TIGR02552      | 1    | 0    | 1    | 0 | 0 |
| IPR021980      | 1.95 | 1.95 | 0    | 0 | 0 |
| IPR009749      | 1.02 | 1    | 1.02 | 0 | 0 |
| IPR007326      | 1.67 | 0    | 1.67 | 0 | 0 |
| IPR007327      | 3.04 | 3.04 | 0    | 0 | 0 |
| IPR007876      | 4.25 | 0    | 4.25 | 0 | 0 |
| IPR002994      | 1.26 | 1.22 | 1.27 | 0 | 0 |
| IPR004660      | 1    | 0    | 1    | 0 | 0 |
| IPR010837      | 1.16 | 0    | 1.16 | 0 | 0 |
| IPR010838      | 1.04 | 0    | 1.04 | 0 | 0 |
| IPR009913      | 1    | 0    | 1    | 0 | 0 |
| IPR009912      | 1.01 | 0    | 1.01 | 1 | 0 |
| IPR001645      | 1.21 | 1.27 | 1    | 0 | 0 |
| PTHR13589:SF6  | 2.5  | 2.5  | 0    | 0 | 0 |
| IPR019454      | 1.42 | 0    | 1.42 | 0 | 0 |
| PF06381        | 1.3  | 0    | 1.3  | 0 | 0 |
| IPR004699      | 1.12 | 0    | 1.12 | 0 | 0 |
| IPR004697      | 1.26 | 0    | 1.26 | 0 | 0 |
| IPR004692      | 1.02 | 1    | 1.02 | 0 | 0 |
| IPR004690      | 1.02 | 0    | 1.02 | 0 | 0 |
| IPR016939      | 1    | 1    | 0    | 0 | 0 |
| IPR017167      | 1    | 0    | 1    | 0 | 0 |
| IPR016931      | 1.03 | 0    | 1.03 | 0 | 0 |
| IPR017166      | 1.28 | 0    | 1.28 | 0 | 0 |
| IPR016935      | 1.07 | 0    | 1.07 | 0 | 0 |
| IPR016934      | 1    | 0    | 1    | 0 | 0 |
| IPR016936      | 1.21 | 0    | 1.21 | 0 | 0 |
| IPR005346      | 1.05 | 0    | 1.05 | 0 | 0 |
| IPR004965      | 5    | 5    | 0    | 0 | 0 |
| IPR004964      | 1.67 | 0    | 1.67 | 0 | 0 |
| IPR018574      | 1.12 | 1.12 | 0    | 0 | 0 |
| IPR009518      | 1.38 | 2.56 | 1.03 | 0 | 0 |
| IPR009511      | 1.15 | 1.15 | 0    | 0 | 0 |
| IPR009510      | 1.06 | 0    | 1.06 | 0 | 0 |
| IPR009515      | 3.14 | 3.14 | 0    | 0 | 0 |
| PTHR14407:SF8  | 1.43 | 1.43 | 0    | 0 | 0 |
| PD141294       | 1.29 | 0    | 1.29 | 0 | 0 |
| PF04953        | 1.15 | 0    | 1.15 | 0 | 0 |
| IPR010480      | 4    | 4    | 0    | 0 | 0 |
| TIGR03442      | 1    | 0    | 1    | 0 | 0 |
| PTHR21102      | 2.4  | 2.4  | 0    | 0 | 0 |
| PTHR21108      | 1.21 | 1.21 | 0    | 0 | 0 |
| IPR016421      | 1.2  | 0    | 1.2  | 0 | 0 |
| TIGR02853      | 1    | 0    | 1    | 0 | 0 |
| IPR016918      | 1.17 | 0    | 1.17 | 0 | 0 |
| PTHR12763:SF2  | 1.25 | 1.25 | 0    | 0 | 0 |
| IPR020133      | 1.5  | 1.5  | 0    | 0 | 0 |
| IPR020135      | 1    | 0    | 1    | 0 | 0 |
| IPR020138      | 1    | 0    | 1    | 0 | 0 |
| IPR001400      | 12.8 | 12.8 | 0    | 0 | 0 |
| TIGR00562      | 1    | 1    | 1    | 0 | 0 |
| IPR019029      | 1.03 | 0    | 1.03 | 0 | 0 |
| IPR019027      | 1.11 | 0    | 1.11 | 0 | 0 |
| IPR012765      | 1    | 0    | 1    | 0 | 0 |
| IPR015235      | 1.78 | 0    | 1.78 | 0 | 0 |
| IPR015231      | 1.01 | 0    | 1.01 | 0 | 0 |
| PTHR12553:SF4  | 1.09 | 1.14 | 1    | 0 | 0 |
| PD042642       | 1    | 0    | 1    | 0 | 0 |
| PTHR21669      | 3.75 | 3.75 | 0    | 0 | 0 |
| PTHR21667      | 1.07 | 1.07 | 0    | 0 | 0 |
| PTHR21665      | 1.67 | 1.67 | 0    | 0 | 0 |
| IPR018770      | 1    | 0    | 1    | 0 | 0 |
| IPR018772      | 1.03 | 0    | 1.03 | 0 | 0 |
| IPR018775      | 1.19 | 0    | 1.19 | 0 | 0 |
| PTHR10516:SF31 | 1    | 0    | 1    | 0 | 0 |
| IPR009069      | 1.27 | 1.27 | 0    | 0 | 0 |
| IPR011440      | 1.69 | 0    | 1.69 | 0 | 0 |
| IPR011443      | 3.17 | 0    | 3.17 | 0 | 0 |



|                |      |      |      |      |   |
|----------------|------|------|------|------|---|
| IPR010293      | 1.1  | 0    | 1.1  | 1    | 0 |
| IPR014934      | 1.09 | 0    | 1.09 | 0    | 0 |
| IPR010319      | 1.65 | 1    | 1.66 | 0    | 0 |
| IPR002812      | 1.25 | 2.38 | 1.14 | 1    | 0 |
| IPR022217      | 1.5  | 0    | 1.5  | 0    | 0 |
| PD053380       | 1.07 | 0    | 1.07 | 0    | 0 |
| PTHR15896:SF4  | 1.67 | 1.67 | 0    | 0    | 0 |
| IPR012206      | 1.67 | 0    | 1.67 | 1.5  | 0 |
| PF07225        | 1.15 | 1.15 | 0    | 0    | 0 |
| TIGR02285      | 1    | 0    | 1    | 0    | 0 |
| PTHR10996:SF1  | 5.14 | 5.14 | 0    | 0    | 0 |
| PTHR16230      | 1.18 | 1.18 | 0    | 0    | 0 |
| IPR005137      | 1.08 | 1.14 | 1.07 | 1.07 | 0 |
| PTHR13042      | 1    | 1    | 0    | 0    | 0 |
| PTHR13047      | 1.42 | 1.42 | 0    | 0    | 0 |
| IPR018987      | 1    | 0    | 1    | 0    | 0 |
| IPR018985      | 1    | 0    | 1    | 0    | 0 |
| IPR018988      | 1.16 | 0    | 1.16 | 0    | 0 |
| IPR018989      | 1.77 | 0    | 1.77 | 0    | 0 |
| PTHR23203      | 4.67 | 4.67 | 0    | 0    | 0 |
| PTHR23207      | 2.4  | 2.4  | 0    | 0    | 0 |
| PTHR23205      | 1.11 | 1.11 | 0    | 0    | 0 |
| PTHR10539      | 1.25 | 1.25 | 0    | 0    | 0 |
| IPR009309      | 1.01 | 0    | 1.01 | 0    | 0 |
| IPR009303      | 1.2  | 0    | 1.2  | 0    | 0 |
| IPR009300      | 2.07 | 0    | 2.07 | 0    | 0 |
| IPR009301      | 1.85 | 0    | 1.85 | 0    | 0 |
| PD034160       | 1.29 | 0    | 1.29 | 0    | 0 |
| PTHR22663:SF10 | 1.61 | 1.61 | 0    | 0    | 0 |
| TIGR02722      | 1.01 | 0    | 1.01 | 0    | 0 |
| PTHR14320      | 1.25 | 1.25 | 0    | 0    | 0 |
| PTHR12295:SF2  | 2.14 | 2.14 | 0    | 0    | 0 |
| PTHR22666      | 1.73 | 1.73 | 0    | 0    | 0 |
| TIGR03133      | 1    | 0    | 1    | 0    | 0 |
| TIGR03131      | 1    | 0    | 1    | 0    | 0 |
| PTHR10074:SF11 | 1.11 | 0    | 1.11 | 0    | 0 |
| PTHR10074:SF14 | 1.7  | 1.7  | 0    | 0    | 0 |
| IPR021458      | 1    | 0    | 1    | 0    | 0 |
| IPR007158      | 1.12 | 0    | 1    | 1.17 | 0 |
| IPR007153      | 1.01 | 1    | 1.02 | 1    | 0 |
| IPR012041      | 1    | 0    | 0    | 1    | 0 |
| IPR012043      | 1    | 0    | 0    | 1    | 0 |
| IPR012042      | 1    | 0    | 1    | 0    | 0 |
| IPR012596      | 1    | 0    | 1    | 0    | 0 |
| IPR012595      | 1.16 | 1.75 | 1    | 0    | 0 |
| IPR001210      | 1.31 | 1.49 | 0    | 1.02 | 0 |
| IPR021299      | 1.13 | 0    | 1.13 | 0    | 0 |
| IPR021297      | 1.07 | 0    | 1.07 | 1    | 0 |
| IPR021292      | 1    | 0    | 1    | 0    | 0 |
| IPR021290      | 1.56 | 0    | 1.56 | 0    | 0 |
| IPR021291      | 1.41 | 0    | 1.41 | 0    | 0 |
| PTHR16038      | 1    | 1    | 0    | 0    | 0 |
| IPR019612      | 1    | 0    | 1    | 0    | 0 |
| IPR019615      | 1.03 | 1    | 1.03 | 0    | 0 |
| IPR019617      | 1.02 | 0    | 1.02 | 0    | 0 |
| PTHR21419:SF7  | 1.33 | 1.33 | 0    | 0    | 0 |
| IPR015066      | 1.11 | 0    | 1.11 | 0    | 0 |
| IPR015067      | 1    | 0    | 1    | 0    | 0 |
| IPR015065      | 1.02 | 0    | 1.02 | 0    | 0 |
| IPR015062      | 1.05 | 0    | 1.05 | 0    | 0 |
| IPR015060      | 1.03 | 0    | 1.03 | 0    | 0 |
| IPR021831      | 1.08 | 0    | 1.08 | 0    | 0 |
| IPR015068      | 1.1  | 0    | 1.1  | 0    | 0 |
| IPR008898      | 1    | 0    | 1    | 0    | 0 |
| IPR008892      | 4.86 | 4.86 | 0    | 0    | 0 |
| IPR003849      | 1.05 | 0    | 1.05 | 0    | 0 |
| IPR006368      | 1.11 | 1.25 | 1    | 0    | 0 |
| PF01203        | 1.01 | 0    | 1.01 | 0    | 0 |
| IPR016777      | 1    | 0    | 1    | 0    | 0 |

|                |      |      |      |      |   |
|----------------|------|------|------|------|---|
| IPR016776      | 1    | 0    | 1    | 0    | 0 |
| PTHR13205:SF8  | 1.12 | 1.12 | 0    | 0    | 0 |
| IPR012905      | 1    | 0    | 1    | 0    | 0 |
| PF06896        | 1    | 0    | 1    | 0    | 0 |
| PF06893        | 1.07 | 0    | 1.07 | 0    | 0 |
| PD868899       | 1.43 | 1.43 | 0    | 0    | 0 |
| IPR004457      | 1.89 | 2.36 | 0    | 1    | 0 |
| PF10701        | 1    | 0    | 1    | 0    | 0 |
| PTHR23071      | 1    | 1    | 0    | 0    | 0 |
| PTHR23072      | 1.12 | 1.12 | 0    | 0    | 0 |
| TIGR01010      | 1.08 | 0    | 1.08 | 0    | 0 |
| PD030925       | 1.67 | 0    | 1.67 | 0    | 0 |
| PTHR21296      | 1    | 1    | 0    | 0    | 0 |
| PTHR12979:SF2  | 1    | 1    | 0    | 0    | 0 |
| TIGR03300      | 1    | 0    | 1    | 0    | 0 |
| TIGR03302      | 1    | 0    | 1    | 0    | 0 |
| TIGR03307      | 1    | 0    | 1    | 0    | 0 |
| TIGR03308      | 1.06 | 0    | 1.06 | 1    | 0 |
| PTHR12526:SF8  | 1.08 | 0    | 1.08 | 0    | 0 |
| PTHR12526:SF9  | 1    | 1    | 1    | 1    | 0 |
| IPR020998      | 1.33 | 1.33 | 0    | 0    | 0 |
| IPR020990      | 1.48 | 0    | 1.48 | 0    | 0 |
| IPR020991      | 1.16 | 0    | 1.16 | 0    | 0 |
| IPR020995      | 1    | 0    | 1    | 0    | 0 |
| IPR003536      | 3    | 0    | 3    | 0    | 0 |
| IPR007343      | 1.22 | 0    | 1.22 | 0    | 0 |
| IPR009844      | 3.75 | 0    | 0    | 3.75 | 0 |
| PD133063       | 1.13 | 0    | 1.13 | 0    | 0 |
| IPR015004      | 1    | 0    | 1    | 0    | 0 |
| IPR004615      | 1.01 | 0    | 1.01 | 0    | 0 |
| IPR018862      | 2.35 | 2.35 | 0    | 0    | 0 |
| IPR018865      | 1.31 | 1.31 | 0    | 0    | 0 |
| IPR004612      | 1.1  | 0    | 1.1  | 0    | 0 |
| IPR018867      | 2.23 | 2.23 | 0    | 0    | 0 |
| IPR018868      | 2.2  | 2.2  | 0    | 0    | 0 |
| IPR012651      | 1.16 | 0    | 1.16 | 0    | 0 |
| IPR012655      | 3.56 | 0    | 3.56 | 0    | 0 |
| IPR012658      | 1.01 | 0    | 1.01 | 0    | 0 |
| IPR021318      | 1.01 | 0    | 1.01 | 0    | 0 |
| IPR021313      | 1.06 | 0    | 1.06 | 0    | 0 |
| IPR021316      | 1.34 | 0    | 1.34 | 0    | 0 |
| IPR009592      | 1.17 | 0    | 1.17 | 0    | 0 |
| IPR009597      | 3.69 | 0    | 3.69 | 0    | 0 |
| IPR009599      | 1    | 0    | 1    | 0    | 0 |
| IPR008408      | 1.67 | 1.67 | 0    | 0    | 0 |
| PF12084        | 1    | 0    | 1    | 0    | 0 |
| PTHR13412      | 1.19 | 1.19 | 0    | 0    | 0 |
| PTHR13413      | 1.57 | 1.57 | 0    | 0    | 0 |
| IPR008403      | 1.4  | 1.4  | 0    | 0    | 0 |
| MF_01817       | 1    | 0    | 1    | 0    | 0 |
| MF_01812       | 1    | 0    | 1    | 0    | 0 |
| IPR010409      | 7.57 | 7.57 | 0    | 0    | 0 |
| IPR014962      | 2.03 | 0    | 2.03 | 0    | 0 |
| IPR014965      | 1    | 0    | 1    | 0    | 0 |
| IPR014967      | 2    | 0    | 2    | 0    | 0 |
| IPR014969      | 1    | 0    | 1    | 1    | 0 |
| PTHR15240      | 4.5  | 4.5  | 0    | 0    | 0 |
| IPR021266      | 1.02 | 1    | 1.02 | 0    | 0 |
| IPR016527      | 1    | 1    | 0    | 0    | 0 |
| TIGR03519      | 4.67 | 0    | 4.67 | 0    | 0 |
| PF10936        | 1    | 0    | 1    | 1    | 0 |
| PF10937        | 1.05 | 1.05 | 0    | 0    | 0 |
| PTHR12732      | 1    | 1    | 0    | 0    | 0 |
| PTHR23055:SF32 | 1.15 | 1.15 | 0    | 0    | 0 |
| IPR020203      | 1.03 | 0    | 1.03 | 0    | 0 |
| IPR020200      | 1    | 0    | 1    | 0    | 0 |
| IPR020206      | 1    | 0    | 1    | 0    | 0 |
| IPR020207      | 1.5  | 1.5  | 0    | 0    | 0 |
| IPR020208      | 1.67 | 0    | 1.67 | 0    | 0 |

|                |      |      |      |      |   |
|----------------|------|------|------|------|---|
| PTHR20948      | 1.39 | 1.39 | 0    | 0    | 0 |
| PTHR20945      | 1    | 1    | 0    | 0    | 0 |
| PTHR20947      | 1    | 1    | 0    | 0    | 0 |
| IPR007440      | 1.05 | 0    | 1.05 | 0    | 0 |
| TIGR00072      | 1    | 0    | 1    | 1    | 0 |
| PD170611       | 1    | 0    | 1    | 0    | 0 |
| PD170612       | 1    | 0    | 1    | 0    | 0 |
| IPR009750      | 1    | 0    | 1    | 0    | 0 |
| IPR009753      | 3.25 | 0    | 3.25 | 0    | 0 |
| PD070794       | 1.25 | 0    | 1.25 | 0    | 0 |
| TIGR03523      | 1.14 | 0    | 1.14 | 0    | 0 |
| PTHR22880:SF19 | 1.33 | 1.33 | 0    | 0    | 0 |
| PTHR22397      | 1    | 1    | 0    | 0    | 0 |
| IPR021667      | 1.33 | 0    | 1.33 | 0    | 0 |
| IPR000940      | 2.86 | 3.36 | 1    | 0    | 0 |
| IPR003766      | 1.12 | 1    | 1.11 | 2    | 0 |
| IPR003763      | 1.08 | 0    | 1.08 | 0    | 0 |
| IPR003761      | 1.03 | 1    | 1.03 | 1    | 0 |
| IPR003768      | 1.03 | 0    | 1.02 | 1.12 | 0 |
| IPR000492      | 1.67 | 1.67 | 0    | 0    | 0 |
| IPR001729      | 1.25 | 1.25 | 0    | 0    | 0 |
| PTHR21290:SF1  | 3.43 | 3.43 | 0    | 0    | 0 |
| IPR013481      | 1.06 | 0    | 1.06 | 0    | 0 |
| MF_00565       | 1    | 0    | 1    | 0    | 0 |
| IPR008561      | 1    | 1    | 1    | 0    | 0 |
| IPR008560      | 1.81 | 1.81 | 0    | 0    | 0 |
| IPR021509      | 1.02 | 0    | 1.02 | 0    | 0 |
| IPR021502      | 1.19 | 0    | 1.19 | 0    | 0 |
| IPR021500      | 1    | 0    | 1    | 0    | 0 |
| IPR021501      | 1    | 0    | 1    | 0    | 0 |
| IPR021506      | 1    | 0    | 1    | 0    | 0 |
| IPR021507      | 8.67 | 8.67 | 0    | 0    | 0 |
| IPR021505      | 1.21 | 0    | 1.21 | 0    | 0 |
| PTHR14194:SF2  | 1.2  | 1.33 | 1.15 | 0    | 0 |
| PTHR14194:SF1  | 1.12 | 0    | 1.12 | 0    | 0 |
| IPR008389      | 2.04 | 2.04 | 0    | 0    | 0 |
| IPR008386      | 1.2  | 1.2  | 0    | 0    | 0 |
| PTHR12975      | 1.29 | 1.29 | 0    | 0    | 0 |
| PTHR12972      | 1.36 | 1.36 | 0    | 0    | 0 |
| IPR009386      | 1.02 | 0    | 1.02 | 0    | 0 |
| IPR009384      | 1.04 | 0    | 1.04 | 0    | 0 |
| IPR009385      | 1.33 | 0    | 1.33 | 0    | 0 |
| PF12328        | 1.03 | 1.04 | 1    | 0    | 0 |
| PF02697        | 1.87 | 0    | 0    | 1.87 | 0 |
| PTHR13628      | 1.25 | 1.25 | 0    | 0    | 0 |
| PTHR13627      | 1.14 | 1.14 | 0    | 0    | 0 |
| PTHR13620      | 1.67 | 1.67 | 0    | 0    | 0 |
| IPR016757      | 1    | 0    | 0    | 1    | 0 |
| IPR010617      | 1.54 | 2.83 | 1.4  | 2.17 | 0 |
| IPR010619      | 1.84 | 2.2  | 1.8  | 1.5  | 0 |
| IPR017042      | 1.75 | 0    | 1.75 | 0    | 0 |
| IPR017041      | 1.33 | 0    | 1.33 | 0    | 0 |
| IPR008728      | 1.21 | 1.21 | 0    | 0    | 0 |
| TIGR03587      | 1    | 0    | 1    | 1    | 0 |
| TIGR03582      | 1    | 0    | 1    | 0    | 0 |
| PTHR11210:SF3  | 1.25 | 1.25 | 0    | 0    | 0 |
| PTHR11210:SF1  | 1    | 1    | 0    | 0    | 0 |
| PTHR23154:SF40 | 1.17 | 1.17 | 0    | 0    | 0 |
| TIGR02953      | 1.06 | 0    | 1.06 | 0    | 0 |
| PD042766       | 1    | 0    | 1    | 0    | 0 |
| PTHR21589      | 1.22 | 1.22 | 0    | 0    | 0 |
| PTHR21588      | 1.81 | 1.81 | 0    | 0    | 0 |
| PTHR21586      | 1.23 | 1.23 | 0    | 0    | 0 |
| PTHR21585      | 2.67 | 2.67 | 0    | 0    | 0 |
| PTHR21581      | 1.86 | 1.86 | 0    | 0    | 0 |
| PTHR21055      | 2.85 | 2.85 | 0    | 0    | 0 |
| PTHR21053      | 1.1  | 1.1  | 0    | 0    | 0 |
| PTHR21052      | 1.29 | 1.29 | 0    | 0    | 0 |
| IPR005996      | 1    | 0    | 1    | 0    | 0 |

|                |       |       |       |      |   |
|----------------|-------|-------|-------|------|---|
| IPR002176      | 1.03  | 1     | 1.03  | 1    | 0 |
| IPR009856      | 2.17  | 2.17  | 0     | 0    | 0 |
| IPR009858      | 1.02  | 2     | 1.01  | 0    | 0 |
| PTHR13824:SF6  | 1.75  | 1.75  | 0     | 0    | 0 |
| PTHR13824:SF5  | 1.83  | 1.83  | 0     | 0    | 0 |
| IPR017208      | 1.14  | 0     | 1.14  | 0    | 0 |
| IPR007458      | 1.04  | 0     | 1.04  | 0    | 0 |
| IPR007459      | 1.01  | 0     | 1.01  | 0    | 0 |
| IPR007456      | 1.01  | 0     | 1.01  | 0    | 0 |
| IPR007457      | 1.02  | 0     | 1.02  | 1    | 0 |
| IPR007451      | 1.02  | 0     | 1.02  | 0    | 0 |
| IPR007453      | 1.15  | 0     | 1.14  | 1.8  | 0 |
| IPR012361      | 1     | 0     | 1     | 0    | 0 |
| IPR012366      | 1     | 0     | 1     | 0    | 0 |
| IPR008480      | 12.14 | 12.14 | 0     | 0    | 0 |
| IPR019311      | 1.04  | 1.04  | 0     | 0    | 0 |
| IPR019314      | 1.11  | 1.11  | 0     | 0    | 0 |
| IPR019318      | 1.34  | 1.34  | 0     | 0    | 0 |
| IPR008735      | 1.6   | 1.6   | 0     | 0    | 0 |
| IPR008730      | 1     | 1     | 0     | 0    | 0 |
| PTHR19410:SF11 | 1.17  | 1.2   | 1     | 0    | 0 |
| IPR021014      | 10.75 | 0     | 10.75 | 0    | 0 |
| IPR001499      | 1.9   | 1.9   | 0     | 0    | 0 |
| IPR009468      | 1.07  | 0     | 1.07  | 0    | 0 |
| IPR009467      | 1.15  | 0     | 1.15  | 0    | 0 |
| IPR014271      | 1.08  | 0     | 1.08  | 0    | 0 |
| TIGR01545      | 1.02  | 0     | 1.02  | 0    | 0 |
| TIGR01091      | 1     | 1     | 1     | 0    | 0 |
| PTHR14208      | 1.75  | 1.75  | 0     | 0    | 0 |
| PD070949       | 1.53  | 0     | 1.53  | 0    | 0 |
| PTHR21217      | 1.6   | 1.6   | 0     | 0    | 0 |
| PTHR21215      | 1     | 1     | 0     | 0    | 0 |
| PTHR21218      | 1.29  | 1.29  | 0     | 0    | 0 |
| IPR020911      | 1.01  | 0     | 1.01  | 0    | 0 |
| PF08524        | 1.04  | 1.05  | 0     | 1    | 0 |
| PTHR11926:SF15 | 14.5  | 14.5  | 0     | 0    | 0 |
| IPR001319      | 1.5   | 1.5   | 0     | 0    | 0 |
| PTHR13469:SF4  | 1.43  | 1.43  | 0     | 0    | 0 |
| PTHR13469:SF1  | 1.2   | 1.2   | 0     | 0    | 0 |
| IPR021396      | 1.23  | 0     | 1.23  | 0    | 0 |
| IPR021395      | 1.03  | 0     | 1.03  | 0    | 0 |
| IPR021399      | 1.4   | 0     | 1.4   | 0    | 0 |
| IPR021398      | 1.04  | 0     | 1.04  | 0    | 0 |
| PTHR13328      | 1.25  | 1.25  | 0     | 0    | 0 |
| PTHR13322      | 1.35  | 1.35  | 0     | 0    | 0 |
| IPR019151      | 1.49  | 1.14  | 1.71  | 1.4  | 0 |
| IPR019488      | 1     | 1     | 0     | 0    | 0 |
| IPR015309      | 1.11  | 0     | 1.11  | 0    | 0 |
| PTHR13497      | 1.61  | 1.61  | 0     | 0    | 0 |
| PTHR13491      | 1.26  | 1.26  | 0     | 0    | 0 |
| PTHR13493      | 1     | 1     | 0     | 0    | 0 |
| IPR021974      | 1     | 0     | 1     | 0    | 0 |
| IPR018685      | 2.13  | 0     | 2.83  | 1.67 | 0 |
| IPR018687      | 1.09  | 1     | 1.09  | 0    | 0 |
| IPR018686      | 1     | 0     | 1     | 1    | 0 |
| IPR018681      | 1.06  | 0     | 1.06  | 0    | 0 |
| IPR018680      | 1.04  | 1     | 1.04  | 1    | 0 |
| IPR018682      | 1.06  | 0     | 1.06  | 0    | 0 |
| IPR009260      | 1.37  | 0     | 1     | 1.44 | 0 |
| IPR005564      | 1.43  | 0     | 1.43  | 0    | 0 |
| IPR005562      | 2.89  | 0     | 2.89  | 0    | 0 |
| IPR002038      | 2.89  | 2.89  | 0     | 0    | 0 |
| IPR014478      | 1     | 0     | 1     | 0    | 0 |
| PF05976        | 1.39  | 1     | 1.39  | 0    | 0 |
| IPR007551      | 1.05  | 3     | 1.04  | 0    | 0 |
| IPR000526      | 1.6   | 1.86  | 1     | 0    | 0 |
| IPR004315      | 2.2   | 2.2   | 0     | 0    | 0 |
| IPR008674      | 1.1   | 0     | 0     | 1.1  | 0 |
| IPR008677      | 2.86  | 3.17  | 1     | 0    | 0 |

|                |       |       |      |      |   |
|----------------|-------|-------|------|------|---|
| PF11576        | 1     | 0     | 0    | 1    | 0 |
| PTHR17204:SF6  | 1     | 1     | 0    | 0    | 0 |
| PD360721       | 1.33  | 1.33  | 0    | 0    | 0 |
| IPR014601      | 1     | 0     | 1    | 0    | 0 |
| PTHR22463      | 1.15  | 1.15  | 0    | 0    | 0 |
| PTHR18867:SF11 | 1.2   | 1.25  | 1    | 0    | 0 |
| IPR017557      | 1.03  | 0     | 1.03 | 0    | 0 |
| PD710533       | 1     | 0     | 1    | 0    | 0 |
| IPR007798      | 2     | 2     | 0    | 0    | 0 |
| IPR007795      | 2.68  | 0     | 2.68 | 0    | 0 |
| PTHR10160:SF2  | 1.08  | 0     | 1.08 | 0    | 0 |
| PD029376       | 2     | 0     | 2    | 0    | 0 |
| PD198255       | 1.29  | 0     | 1.29 | 0    | 0 |
| PTHR10160      | 1     | 0     | 1    | 0    | 0 |
| IPR012469      | 1.31  | 1.67  | 1    | 0    | 0 |
| IPR009659      | 1.01  | 0     | 1.01 | 0    | 0 |
| IPR001109      | 1.42  | 0     | 1.46 | 1.1  | 0 |
| IPR021585      | 1     | 0     | 0    | 1    | 0 |
| IPR022057      | 1.66  | 1.66  | 0    | 0    | 0 |
| IPR022050      | 1.09  | 1     | 1.09 | 0    | 0 |
| IPR019727      | 1     | 1     | 0    | 0    | 0 |
| IPR019723      | 1.63  | 0     | 1.63 | 0    | 0 |
| IPR019722      | 1     | 0     | 1    | 0    | 0 |
| IPR019728      | 1.04  | 0     | 1.04 | 0    | 0 |
| IPR008303      | 1     | 0     | 0    | 1    | 0 |
| IPR008304      | 1     | 0     | 0    | 1    | 0 |
| IPR008308      | 1.02  | 0     | 1.02 | 0    | 0 |
| IPR015112      | 1     | 0     | 1    | 0    | 0 |
| IPR015113      | 1     | 0     | 1    | 0    | 0 |
| IPR002480      | 1.26  | 2.26  | 1.1  | 0    | 0 |
| IPR010564      | 1     | 0     | 1    | 0    | 0 |
| IPR010567      | 2.29  | 0     | 2.29 | 0    | 0 |
| PTHR11654      | 1.6   | 1.6   | 0    | 0    | 0 |
| IPR010696      | 1.01  | 0     | 1.01 | 0    | 0 |
| IPR010697      | 1.01  | 0     | 1.01 | 0    | 0 |
| IPR010695      | 1.15  | 1.15  | 0    | 0    | 0 |
| IPR010692      | 2.33  | 0     | 2.33 | 0    | 0 |
| IPR010690      | 1.02  | 0     | 1.02 | 0    | 0 |
| IPR010691      | 1.02  | 0     | 1.02 | 0    | 0 |
| PTHR10356      | 3     | 3     | 0    | 0    | 0 |
| IPR022121      | 2.4   | 0     | 2.42 | 2    | 0 |
| MF_01061       | 1     | 0     | 1    | 0    | 0 |
| IPR007960      | 16.56 | 16.56 | 0    | 0    | 0 |
| PF04126        | 1.08  | 0     | 1.03 | 1.25 | 0 |
| PTHR12586      | 1.3   | 1.42  | 1    | 0    | 0 |
| PTHR12581      | 1.37  | 1.37  | 0    | 0    | 0 |
| IPR012875      | 1.14  | 1.31  | 1.02 | 0    | 0 |
| IPR012879      | 1.18  | 1.18  | 0    | 0    | 0 |
| PF02157        | 1.23  | 1.23  | 0    | 0    | 0 |
| PD066019       | 1     | 0     | 1    | 0    | 0 |
| IPR012566      | 1     | 0     | 1    | 0    | 0 |
| IPR012567      | 1     | 0     | 1    | 0    | 0 |
| TIGR02794      | 1.02  | 0     | 1.02 | 0    | 0 |
| IPR021741      | 1.31  | 0     | 1.27 | 1.5  | 0 |
| IPR021749      | 1     | 0     | 1    | 0    | 0 |
| PTHR21502      | 1.74  | 1.74  | 0    | 0    | 0 |
| IPR005915      | 5.41  | 0     | 5.41 | 0    | 0 |
| PF08927        | 1.5   | 1.5   | 0    | 0    | 0 |
| IPR018602      | 1.06  | 0     | 1.06 | 0    | 0 |
| PTHR15378      | 2.33  | 2.33  | 0    | 0    | 0 |
| MF_01266       | 1     | 0     | 1    | 0    | 0 |
| IPR007184      | 1.89  | 1.5   | 1.98 | 1.25 | 0 |
| IPR001801      | 2.88  | 3     | 2.88 | 0    | 0 |
| IPR007236      | 1.02  | 0     | 1.02 | 0    | 0 |
| IPR008409      | 1.2   | 1.2   | 0    | 0    | 0 |
| IPR008406      | 5.71  | 5.71  | 0    | 0    | 0 |
| IPR008401      | 1.07  | 1.07  | 0    | 0    | 0 |
| PTHR11276:SF2  | 1     | 0     | 1    | 0    | 0 |
| IPR021268      | 1.57  | 0     | 1.57 | 0    | 0 |

|                |      |      |      |      |   |
|----------------|------|------|------|------|---|
| IPR021263      | 1.94 | 0    | 1.94 | 0    | 0 |
| IPR021262      | 1.71 | 0    | 1.71 | 0    | 0 |
| IPR021260      | 1.14 | 0    | 1.14 | 0    | 0 |
| PTHR16757      | 1.25 | 1.33 | 1    | 0    | 0 |
| IPR016844      | 1    | 0    | 1    | 0    | 0 |
| IPR016847      | 1    | 0    | 1    | 0    | 0 |
| IPR009752      | 1.15 | 0    | 1.15 | 0    | 0 |
| IPR016841      | 1.07 | 0    | 1.07 | 0    | 0 |
| IPR016843      | 1    | 0    | 1    | 0    | 0 |
| IPR009759      | 1.78 | 0    | 1.78 | 0    | 0 |
| IPR009758      | 1.23 | 0    | 1.23 | 0    | 0 |
| IPR005272      | 1.4  | 0    | 1.4  | 0    | 0 |
| PTHR11201:SF38 | 1.08 | 1.08 | 0    | 0    | 0 |
| IPR019392      | 1.59 | 1.59 | 0    | 0    | 0 |
| IPR019393      | 1.28 | 1.28 | 0    | 0    | 0 |
| IPR019394      | 2.39 | 2.39 | 0    | 0    | 0 |
| IPR019397      | 1.65 | 1.65 | 0    | 0    | 0 |
| PTHR12011:SF3  | 3    | 3    | 0    | 0    | 0 |
| IPR005497      | 1.08 | 1.38 | 1    | 0    | 0 |
| IPR002723      | 1.02 | 0    | 1.03 | 1    | 0 |
| IPR002725      | 1.28 | 0    | 1.28 | 1.19 | 0 |
| IPR003897      | 1.83 | 0    | 1.83 | 0    | 0 |
| IPR017496      | 1.1  | 0    | 1.1  | 0    | 0 |
| IPR017499      | 1.05 | 1.22 | 1    | 0    | 0 |
| IPR010711      | 1.6  | 1.6  | 0    | 0    | 0 |
| PTHR21871      | 1    | 1    | 0    | 0    | 0 |
| PTHR19432:SF2  | 1.33 | 1.37 | 1.2  | 0    | 0 |
| IPR016457      | 1    | 0    | 1    | 1    | 0 |
| PTHR10333:SF22 | 1.25 | 1.25 | 0    | 0    | 0 |
| PTHR13480      | 1.39 | 1.39 | 0    | 0    | 0 |
| IPR020332      | 1    | 0    | 1    | 0    | 0 |
| IPR020330      | 1    | 0    | 0    | 1    | 0 |
| PTHR11600:SF38 | 1.33 | 1.33 | 0    | 0    | 0 |
| IPR021461      | 1.5  | 0    | 1.5  | 0    | 0 |
| IPR021465      | 1    | 0    | 1    | 0    | 0 |
| IPR021464      | 3    | 0    | 3    | 0    | 0 |
| IPR021468      | 1    | 0    | 1    | 0    | 0 |
| PD030350       | 1.2  | 0    | 1.2  | 0    | 0 |
| PTHR21714      | 1.36 | 1.36 | 0    | 0    | 0 |
| PTHR21718      | 1.07 | 1.07 | 0    | 0    | 0 |
| PTHR21719      | 2    | 2    | 0    | 0    | 0 |
| IPR015385      | 1    | 0    | 1    | 0    | 0 |
| IPR015389      | 1.6  | 1.6  | 0    | 0    | 0 |
| PTHR11540      | 1.14 | 2    | 1    | 0    | 0 |
| IPR009953      | 1.15 | 0    | 1.15 | 0    | 0 |
| IPR009952      | 1.2  | 1.2  | 0    | 0    | 0 |
| IPR009950      | 1.02 | 0    | 1.02 | 0    | 0 |
| IPR009957      | 2    | 0    | 2    | 0    | 0 |
| IPR009956      | 1.2  | 0    | 1.23 | 1    | 0 |
| IPR009954      | 1.78 | 0    | 1.78 | 0    | 0 |
| IPR009295      | 1.21 | 0    | 1.21 | 0    | 0 |
| IPR010263      | 1.82 | 0    | 1.82 | 0    | 0 |
| IPR010266      | 1.35 | 1    | 1.35 | 0    | 0 |
| IPR007882      | 1.62 | 1.62 | 0    | 0    | 0 |
| IPR007884      | 1.21 | 1.23 | 1    | 0    | 0 |
| IPR010849      | 1.38 | 1.38 | 0    | 0    | 0 |
| IPR010848      | 1.04 | 0    | 1.04 | 0    | 0 |
| IPR010841      | 1.09 | 0    | 1.09 | 0    | 0 |
| IPR010840      | 1.04 | 0    | 1.04 | 0    | 0 |
| PTHR21596:SF1  | 1.5  | 1.5  | 0    | 0    | 0 |
| PD053230       | 1    | 0    | 1    | 0    | 0 |
| PD016359       | 1    | 0    | 1    | 0    | 0 |
| PF06914        | 2    | 0    | 2    | 0    | 0 |
| IPR001612      | 2.94 | 2.94 | 0    | 0    | 0 |
| IPR001614      | 2.93 | 2.93 | 0    | 0    | 0 |
| IPR001615      | 2.2  | 0    | 2.2  | 0    | 0 |
| PF07352        | 1    | 0    | 1    | 0    | 0 |
| PTHR23125:SF22 | 4.5  | 4.5  | 0    | 0    | 0 |
| PTHR23125:SF26 | 1    | 1    | 0    | 0    | 0 |

|                |      |      |      |      |   |
|----------------|------|------|------|------|---|
| IPR019215      | 1.75 | 0    | 1    | 1.8  | 0 |
| IPR019217      | 1    | 0    | 1    | 1    | 0 |
| IPR019211      | 1    | 0    | 0    | 1    | 0 |
| IPR019210      | 1    | 0    | 0    | 1    | 0 |
| IPR019212      | 1    | 0    | 0    | 1    | 0 |
| IPR019218      | 1    | 0    | 0    | 1    | 0 |
| PD107456       | 1    | 1    | 0    | 0    | 0 |
| IPR014464      | 1    | 0    | 1    | 0    | 0 |
| IPR009542      | 1.16 | 1.16 | 0    | 0    | 0 |
| IPR019289      | 1.17 | 0    | 1.17 | 0    | 0 |
| PTHR14124      | 1    | 1    | 0    | 0    | 0 |
| PTHR15294      | 1.6  | 1.6  | 0    | 0    | 0 |
| PTHR15296      | 1.2  | 1.2  | 0    | 0    | 0 |
| IPR005370      | 1.1  | 0    | 1.1  | 0    | 0 |
| PTHR12420:SF3  | 1.64 | 1.64 | 0    | 0    | 0 |
| PTHR15744      | 1.35 | 1.35 | 0    | 0    | 0 |
| PF11092        | 1.5  | 1.5  | 0    | 0    | 0 |
| PTHR23161:SF2  | 1.33 | 1.33 | 0    | 0    | 0 |
| PTHR21156      | 1.17 | 1.17 | 0    | 0    | 0 |
| PTHR21157      | 1    | 1    | 0    | 0    | 0 |
| PTHR21321:SF1  | 1.17 | 1.17 | 0    | 0    | 0 |
| PTHR21321:SF2  | 1.25 | 1.25 | 0    | 0    | 0 |
| PD104119       | 1    | 0    | 1    | 0    | 0 |
| PD033929       | 1.17 | 0    | 1.17 | 0    | 0 |
| IPR007715      | 1.51 | 1.3  | 1.94 | 0    | 0 |
| TIGR02826      | 1    | 0    | 1    | 0    | 0 |
| IPR020100      | 1.5  | 1.5  | 0    | 0    | 0 |
| IPR020105      | 1    | 0    | 1    | 0    | 0 |
| IPR021055      | 2.15 | 0    | 2.15 | 0    | 0 |
| IPR001185      | 1.06 | 1.25 | 1.06 | 1.17 | 0 |
| IPR019054      | 1.33 | 0    | 1.5  | 1    | 0 |
| IPR019051      | 1.02 | 0    | 1.02 | 0    | 0 |
| IPR019058      | 1    | 0    | 1    | 0    | 0 |
| IPR019214      | 1    | 0    | 0    | 1    | 0 |
| IPR018013      | 1.83 | 0    | 1.83 | 0    | 0 |
| IPR011471      | 4.5  | 0    | 4.5  | 0    | 0 |
| IPR011470      | 2.17 | 0    | 2.17 | 0    | 0 |
| IPR011473      | 1.04 | 1    | 1.04 | 0    | 0 |
| IPR013837      | 1    | 1    | 0    | 0    | 0 |
| PTHR19211:SF7  | 1    | 1    | 1    | 0    | 0 |
| IPR014644      | 1    | 1    | 0    | 0    | 0 |
| IPR016648      | 1    | 0    | 0    | 1    | 0 |
| IPR013161      | 1.5  | 0    | 1.5  | 0    | 0 |
| IPR013169      | 1.07 | 1.07 | 0    | 0    | 0 |
| PTHR16886      | 1.25 | 1.25 | 0    | 0    | 0 |
| PF10879        | 1    | 0    | 1    | 0    | 0 |
| PF10875        | 1    | 0    | 1    | 0    | 0 |
| PF10873        | 1.6  | 1.6  | 0    | 0    | 0 |
| PTHR15504      | 1.12 | 1.12 | 0    | 0    | 0 |
| PF06704        | 1    | 0    | 1    | 0    | 0 |
| PF06705        | 1.8  | 1.8  | 0    | 0    | 0 |
| PF03283        | 2.72 | 4.19 | 1.12 | 0    | 0 |
| IPR008020      | 1    | 0    | 1    | 0    | 0 |
| IPR008024      | 1.81 | 0    | 1.81 | 0    | 0 |
| IPR008027      | 1.16 | 1.16 | 0    | 0    | 0 |
| PF05426        | 1.16 | 1.5  | 1.15 | 0    | 0 |
| PTHR23185      | 1.64 | 1.64 | 0    | 0    | 0 |
| PTHR23186      | 1.71 | 1.71 | 0    | 0    | 0 |
| PTHR14379      | 1.36 | 1.36 | 0    | 0    | 0 |
| TIGR00412      | 1.08 | 0    | 1.06 | 1.22 | 0 |
| MF_01229       | 1    | 0    | 1    | 0    | 0 |
| TIGR03149      | 1    | 0    | 1    | 0    | 0 |
| PTHR11654:SF37 | 5.67 | 5.67 | 0    | 0    | 0 |
| IPR020600      | 1.05 | 0    | 1.25 | 1    | 0 |
| IPR003332      | 1.67 | 0    | 1.67 | 0    | 0 |
| IPR013365      | 1    | 0    | 1    | 0    | 0 |
| IPR000688      | 1.35 | 0    | 1.38 | 1.13 | 0 |
| IPR000686      | 3.2  | 3.2  | 0    | 0    | 0 |
| PTHR17469:SF8  | 3.5  | 3.5  | 0    | 0    | 0 |

|                |      |      |      |      |   |
|----------------|------|------|------|------|---|
| IPR012096      | 1    | 0    | 0    | 1    | 0 |
| IPR012097      | 1    | 0    | 1    | 0    | 0 |
| IPR012093      | 1    | 0    | 1    | 0    | 0 |
| IPR021150      | 1.17 | 1.31 | 1    | 0    | 0 |
| IPR021156      | 7.25 | 7.25 | 0    | 0    | 0 |
| IPR012545      | 1.13 | 0    | 1.13 | 1    | 0 |
| IPR012546      | 4.67 | 0    | 0    | 4.67 | 0 |
| IPR012543      | 1.09 | 0    | 1.09 | 0    | 0 |
| IPR011675      | 1.75 | 0    | 1.75 | 0    | 0 |
| IPR008226      | 1    | 1    | 1    | 0    | 0 |
| PTHR12701:SF1  | 1.43 | 1.43 | 0    | 0    | 0 |
| IPR015019      | 1.16 | 1.17 | 0    | 1    | 0 |
| PD022058       | 1.12 | 0    | 1.12 | 0    | 0 |
| IPR006990      | 2.33 | 2.33 | 0    | 0    | 0 |
| TIGR00910      | 1    | 0    | 1    | 0    | 0 |
| IPR010793      | 2.2  | 2.2  | 0    | 0    | 0 |
| IPR010797      | 2    | 2    | 0    | 0    | 0 |
| IPR010794      | 1.04 | 0    | 1.04 | 0    | 0 |
| IPR003810      | 2.74 | 1    | 2.79 | 2.1  | 0 |
| IPR017411      | 1.6  | 1.6  | 0    | 0    | 0 |
| IPR014852      | 1.04 | 0    | 1.04 | 0    | 0 |
| PTHR22526      | 1.1  | 1.1  | 0    | 0    | 0 |
| IPR000892      | 1.3  | 1.38 | 0    | 1    | 0 |
| PTHR11751:SF21 | 1    | 0    | 1    | 0    | 0 |
| PTHR11751:SF29 | 1.2  | 1.2  | 0    | 0    | 0 |
| IPR019638      | 1.61 | 0    | 1.61 | 0    | 0 |
| PTHR11938:SF8  | 1.25 | 0    | 1.25 | 1    | 0 |
| PTHR11938:SF4  | 1    | 1    | 1    | 0    | 0 |
| PTHR15672:SF7  | 1.2  | 1.2  | 0    | 0    | 0 |
| PTHR15672:SF1  | 2.57 | 2.57 | 0    | 0    | 0 |
| IPR020443      | 3.29 | 3.29 | 0    | 0    | 0 |
| PF10756        | 2.17 | 0    | 2.17 | 0    | 0 |
| IPR008495      | 3    | 0    | 3    | 0    | 0 |
| PF05213        | 1    | 0    | 1    | 0    | 0 |
| PF05218        | 3    | 9    | 1    | 0    | 0 |
| TIGR02505      | 1    | 0    | 1    | 0    | 0 |
| TIGR02500      | 1.12 | 0    | 1.12 | 0    | 0 |
| TIGR02501      | 1    | 0    | 1    | 0    | 0 |
| TIGR02503      | 1    | 0    | 1    | 0    | 0 |
| PTHR21468      | 1.2  | 1.2  | 0    | 0    | 0 |
| PTHR21796      | 1.17 | 1.17 | 0    | 0    | 0 |
| PTHR21797      | 1.36 | 1.36 | 0    | 0    | 0 |
| IPR022155      | 1.17 | 1.17 | 0    | 0    | 0 |
| PTHR23236:SF2  | 1    | 1    | 0    | 0    | 0 |
| IPR007801      | 1.42 | 0    | 1.42 | 0    | 0 |
| IPR007800      | 4    | 0    | 4    | 0    | 0 |
| IPR007808      | 1.27 | 1.36 | 1    | 1    | 0 |
| PTHR19222:SF31 | 1    | 1    | 1    | 0    | 0 |
| PTHR19222:SF32 | 1    | 0    | 1    | 1    | 0 |
| IPR001928      | 6    | 6    | 0    | 0    | 0 |
| IPR007375      | 1.38 | 0    | 1.38 | 0    | 0 |
| IPR007376      | 1.06 | 0    | 1.06 | 0    | 0 |
| IPR016219      | 1    | 1    | 0    | 0    | 0 |
| PTHR21152:SF1  | 1.06 | 1    | 1.07 | 0    | 0 |
| IPR021342      | 1    | 0    | 1    | 0    | 0 |
| IPR021343      | 1    | 0    | 1    | 0    | 0 |
| IPR021344      | 1.26 | 0    | 1.26 | 0    | 0 |
| IPR021347      | 2.39 | 0    | 2.39 | 0    | 0 |
| PTHR19242:SF53 | 1    | 0    | 1    | 0    | 0 |
| IPR001690      | 1.63 | 1    | 1.64 | 0    | 0 |
| IPR017254      | 1    | 0    | 1    | 0    | 0 |
| IPR012661      | 3.7  | 0    | 3.7  | 0    | 0 |
| IPR012667      | 1.04 | 0    | 1.04 | 1    | 0 |
| IPR016963      | 1    | 0    | 1    | 0    | 0 |
| IPR019298      | 1.29 | 0    | 1.27 | 1.33 | 0 |
| IPR019296      | 1    | 0    | 0    | 1    | 0 |
| IPR012508      | 1    | 0    | 0    | 1    | 0 |
| PTHR11999:SF5  | 1.2  | 1.2  | 0    | 0    | 0 |
| PD026569       | 1.17 | 0    | 1.17 | 0    | 0 |



|                |       |       |      |      |   |
|----------------|-------|-------|------|------|---|
| IPR005598      | 1.02  | 1     | 1.02 | 0    | 0 |
| IPR005591      | 1.15  | 0     | 1.15 | 0    | 0 |
| PTHR13425      | 1.33  | 1.33  | 0    | 0    | 0 |
| PTHR13420      | 1.1   | 1.1   | 0    | 0    | 0 |
| IPR019433      | 1     | 1     | 0    | 0    | 0 |
| IPR019435      | 1.67  | 1.67  | 0    | 0    | 0 |
| IPR002644      | 1.07  | 1.3   | 1    | 0    | 0 |
| IPR003996      | 1.19  | 0     | 1.19 | 0    | 0 |
| IPR006818      | 1.35  | 1.35  | 0    | 0    | 0 |
| PTHR21159      | 1.36  | 1.36  | 0    | 0    | 0 |
| IPR006813      | 1.93  | 2.06  | 1    | 0    | 0 |
| IPR006812      | 1.68  | 0     | 1.68 | 0    | 0 |
| IPR006811      | 1.19  | 1.19  | 0    | 0    | 0 |
| IPR006817      | 2.2   | 0     | 2.2  | 0    | 0 |
| PF11093        | 1     | 1     | 0    | 0    | 0 |
| PTHR21931      | 1.56  | 1.56  | 0    | 0    | 0 |
| IPR014959      | 1.05  | 0     | 1.05 | 0    | 0 |
| IPR014951      | 3     | 0     | 3    | 0    | 0 |
| IPR014953      | 1     | 1     | 1    | 0    | 0 |
| IPR014952      | 1     | 1     | 1    | 0    | 0 |
| IPR014955      | 1.03  | 1     | 1.03 | 0    | 0 |
| IPR014954      | 1     | 1     | 1    | 0    | 0 |
| IPR016557      | 1     | 0     | 1    | 1    | 0 |
| IPR016553      | 1.33  | 1.33  | 0    | 0    | 0 |
| IPR016550      | 1.8   | 1.8   | 0    | 0    | 0 |
| PF10949        | 1     | 0     | 1    | 0    | 0 |
| IPR019688      | 1     | 0     | 1    | 0    | 0 |
| IPR019689      | 1.42  | 0     | 1.42 | 0    | 0 |
| PF11019        | 2.35  | 1     | 2.42 | 0    | 0 |
| IPR019683      | 1     | 0     | 1    | 0    | 0 |
| IPR019685      | 1.02  | 0     | 1.02 | 0    | 0 |
| PTHR20970      | 1.08  | 1.08  | 0    | 0    | 0 |
| PTHR20979      | 1     | 1     | 0    | 0    | 0 |
| PTHR12294:SF2  | 1     | 1     | 0    | 0    | 0 |
| IPR020180      | 1     | 0     | 1    | 0    | 0 |
| IPR020183      | 1     | 0     | 1    | 0    | 0 |
| IPR020185      | 1     | 0     | 1    | 0    | 0 |
| IPR020186      | 1.4   | 1.4   | 0    | 0    | 0 |
| IPR019534      | 1.07  | 1.09  | 1    | 0    | 0 |
| IPR018728      | 1.31  | 0     | 1.3  | 2    | 0 |
| IPR018729      | 1.14  | 0     | 1.14 | 0    | 0 |
| IPR018723      | 1.13  | 0     | 1.13 | 1.17 | 0 |
| IPR018721      | 1.49  | 1     | 1.53 | 1    | 0 |
| IPR021633      | 2.08  | 2.08  | 0    | 0    | 0 |
| IPR021634      | 1     | 0     | 1    | 0    | 0 |
| IPR021637      | 1.14  | 0     | 1.14 | 0    | 0 |
| PTHR21613      | 1.58  | 1.58  | 0    | 0    | 0 |
| PTHR21617      | 1.12  | 1.12  | 0    | 0    | 0 |
| IPR005865      | 1     | 0     | 0    | 1    | 0 |
| PTHR11375      | 1.48  | 1.48  | 0    | 0    | 0 |
| IPR010345      | 3.75  | 3.75  | 0    | 0    | 0 |
| IPR010341      | 8.14  | 8.14  | 0    | 0    | 0 |
| IPR010342      | 1.05  | 1.19  | 1.03 | 0    | 0 |
| IPR010343      | 1.76  | 2     | 1.76 | 1    | 0 |
| IPR000990      | 8.52  | 8.52  | 0    | 0    | 0 |
| IPR002844      | 1     | 0     | 0    | 1    | 0 |
| IPR006741      | 1.77  | 0     | 1.77 | 0    | 0 |
| MF_01641       | 1     | 0     | 1    | 0    | 0 |
| PF07783        | 1     | 0     | 0    | 1    | 0 |
| PTHR12011:SF12 | 2.31  | 2.31  | 0    | 0    | 0 |
| IPR001719      | 1.03  | 1     | 1.03 | 1    | 0 |
| IPR008530      | 1.38  | 1.38  | 0    | 0    | 0 |
| IPR008536      | 1.22  | 1.33  | 1    | 0    | 0 |
| PF06127        | 1.79  | 1.79  | 1.79 | 0    | 0 |
| TIGR03090      | 1     | 0     | 1    | 0    | 0 |
| IPR004878      | 4.35  | 4.35  | 0    | 0    | 0 |
| IPR004873      | 19.86 | 19.86 | 0    | 0    | 0 |
| PTHR13098      | 1.47  | 1.47  | 0    | 0    | 0 |
| PTHR13090      | 1.04  | 1.5   | 1    | 0    | 0 |

|                |      |      |      |      |   |
|----------------|------|------|------|------|---|
| IPR009378      | 1.61 | 1.61 | 0    | 0    | 0 |
| IPR009371      | 1    | 0    | 1    | 0    | 0 |
| IPR009370      | 1.01 | 0    | 1.01 | 0    | 0 |
| IPR009377      | 1.02 | 0    | 1.02 | 0    | 0 |
| IPR021949      | 1    | 0    | 1    | 0    | 0 |
| IPR018716      | 1    | 0    | 0    | 1    | 0 |
| PTHR13077:SF3  | 1.4  | 1.4  | 0    | 0    | 0 |
| PTHR15021      | 2.11 | 2.11 | 0    | 0    | 0 |
| PTHR15020      | 1.15 | 1.17 | 1.14 | 0    | 0 |
| PTHR15026      | 1    | 1    | 0    | 0    | 0 |
| PTHR21366      | 1.14 | 1    | 1.14 | 0    | 0 |
| PTHR11614:SF20 | 2.25 | 2.43 | 1    | 0    | 0 |
| PTHR13286:SF1  | 1.06 | 1.06 | 0    | 0    | 0 |
| PTHR13286:SF2  | 1.38 | 1.38 | 0    | 0    | 0 |
| PTHR21178:SF1  | 1    | 1    | 0    | 0    | 0 |
| PTHR21178:SF2  | 1    | 1    | 0    | 0    | 0 |
| IPR000604      | 1.4  | 0    | 1.4  | 0    | 0 |
| PF09541        | 1.07 | 0    | 1.07 | 0    | 0 |
| IPR001559      | 1.25 | 1.36 | 1.25 | 1    | 0 |
| IPR012015      | 1    | 0    | 1    | 1    | 0 |
| PTHR21219:SF2  | 1.73 | 1.73 | 0    | 0    | 0 |
| IPR019648      | 1.08 | 0    | 1.08 | 0    | 0 |
| IPR019649      | 1.72 | 1    | 1.75 | 0    | 0 |
| IPR019646      | 1.07 | 0    | 1.07 | 0    | 0 |
| IPR019647      | 1.05 | 0    | 1.05 | 0    | 0 |
| IPR019644      | 1.01 | 0    | 1.01 | 0    | 0 |
| IPR019645      | 1.67 | 1.67 | 0    | 0    | 0 |
| IPR019643      | 1.32 | 1    | 1.33 | 0    | 0 |
| PTHR13626:SF1  | 2    | 2    | 0    | 0    | 0 |
| PTHR21008      | 1.29 | 1.29 | 0    | 0    | 0 |
| PTHR21009      | 5.08 | 5.08 | 0    | 0    | 0 |
| PTHR10414:SF17 | 1    | 1    | 0    | 0    | 0 |
| IPR011737      | 1.09 | 0    | 1.09 | 0    | 0 |
| IPR011735      | 1.23 | 2    | 1    | 0    | 0 |
| IPR011733      | 1.5  | 0    | 1.52 | 1    | 0 |
| IPR009829      | 1.07 | 1.07 | 0    | 0    | 0 |
| IPR009824      | 5    | 0    | 5    | 0    | 0 |
| IPR009822      | 1.02 | 2    | 1.01 | 0    | 0 |
| IPR009821      | 2    | 0    | 2    | 0    | 0 |
| PTHR12826:SF3  | 1    | 1    | 0    | 0    | 0 |
| IPR007463      | 1.31 | 0    | 1.31 | 0    | 0 |
| MF_01565       | 1    | 0    | 1    | 0    | 0 |
| MF_01566       | 1    | 0    | 1    | 0    | 0 |
| PD199129       | 1    | 0    | 1    | 0    | 0 |
| PTHR12396      | 2.29 | 2.29 | 0    | 0    | 0 |
| PTHR10499:SF46 | 1.17 | 1.2  | 1    | 0    | 0 |
| IPR012355      | 1    | 1    | 0    | 0    | 0 |
| IPR012354      | 1.09 | 0    | 1.09 | 0    | 0 |
| IPR012356      | 1.12 | 0    | 0    | 1.12 | 0 |
| IPR014220      | 1    | 0    | 1    | 0    | 0 |
| PD072223       | 1    | 0    | 1    | 0    | 0 |
| IPR019329      | 1.32 | 1.32 | 0    | 0    | 0 |
| PF02211        | 2.17 | 2    | 2.18 | 0    | 0 |
| IPR019321      | 1.62 | 1.62 | 0    | 0    | 0 |
| IPR019322      | 1.04 | 1.04 | 0    | 0    | 0 |
| IPR004485      | 1.28 | 1    | 1.31 | 1    | 0 |
| IPR008708      | 1.67 | 0    | 1.67 | 0    | 0 |
| TIGR02585      | 1.08 | 0    | 1.09 | 1    | 0 |
| PTHR11210      | 1.51 | 1.51 | 0    | 0    | 0 |
| PTHR22779      | 1    | 1    | 0    | 0    | 0 |
| TIGR03354      | 1    | 0    | 1    | 0    | 0 |
| TIGR03352      | 1.38 | 0    | 1.38 | 0    | 0 |
| PTHR11227:SF18 | 1.53 | 1.53 | 0    | 0    | 0 |
| PTHR11227:SF17 | 1.18 | 1.18 | 0    | 0    | 0 |
| IPR000036      | 1.18 | 0    | 1.18 | 0    | 0 |
| IPR013248      | 1.07 | 1.07 | 0    | 0    | 0 |
| PTHR21091:SF4  | 1    | 0    | 0    | 1    | 0 |
| PTHR13356      | 1.45 | 1.56 | 0    | 1    | 0 |
| PTHR13354      | 1.1  | 1.1  | 0    | 0    | 0 |

|               |       |      |       |      |   |
|---------------|-------|------|-------|------|---|
| PTHR13350     | 1.35  | 1.35 | 0     | 0    | 0 |
| PTHR21631:SF4 | 1.21  | 1.18 | 1.22  | 0    | 0 |
| IPR012453     | 13.25 | 0    | 13.25 | 0    | 0 |
| IPR006891     | 6.67  | 0    | 6.67  | 0    | 0 |
| IPR010454     | 1     | 0    | 1     | 0    | 0 |
| IPR010455     | 1.41  | 0    | 1.41  | 0    | 0 |
| IPR010452     | 1.04  | 0    | 1.04  | 0    | 0 |
| PD111187      | 1     | 0    | 1     | 1    | 0 |
| IPR006279     | 1.4   | 0    | 1.4   | 0    | 0 |
| IPR014487     | 1.02  | 0    | 1.02  | 0    | 0 |
| PTHR12475:SF3 | 1     | 1    | 0     | 0    | 0 |
| PTHR12475:SF2 | 1.36  | 1.36 | 0     | 0    | 0 |
| MF_01155      | 1     | 0    | 1     | 0    | 0 |
| MF_01157      | 1     | 0    | 1     | 0    | 0 |
| IPR013907     | 2.28  | 2.28 | 0     | 0    | 0 |
| IPR013906     | 1.19  | 1.19 | 0     | 0    | 0 |
| IPR013901     | 1.42  | 1.87 | 1.09  | 0    | 0 |
| IPR020273     | 1.02  | 0    | 1.02  | 0    | 0 |
| IPR020271     | 1.2   | 0    | 0     | 1.2  | 0 |
| IPR020277     | 1.05  | 0    | 1.05  | 0    | 0 |
| PTHR23346     | 1     | 1    | 0     | 0    | 0 |
| TIGR03578     | 1     | 0    | 1     | 0    | 0 |
| TIGR03579     | 1     | 0    | 1     | 0    | 0 |
| TIGR03577     | 1     | 0    | 1     | 0    | 0 |
| TIGR03573     | 1.16  | 0    | 1.16  | 0    | 0 |
| TIGR03570     | 1.06  | 0    | 1.06  | 1    | 0 |
| PD074041      | 1     | 0    | 1     | 0    | 0 |
| TIGR02621     | 1     | 0    | 1     | 0    | 0 |
| PTHR21692     | 1.91  | 1.91 | 0     | 0    | 0 |
| PTHR21696     | 1.6   | 1.6  | 0     | 0    | 0 |
| PTHR21699     | 1.38  | 1.38 | 0     | 0    | 0 |
| PTHR21698     | 3.21  | 3.21 | 0     | 0    | 0 |
| IPR006079     | 1.44  | 0    | 1.44  | 0    | 0 |
| PD052359      | 1     | 0    | 1     | 0    | 0 |
| IPR000448     | 6.2   | 6.2  | 0     | 0    | 0 |
| IPR007035     | 1.12  | 0    | 1.13  | 1    | 0 |
| PF10877       | 1     | 0    | 1     | 0    | 0 |
| IPR000268     | 1.13  | 1.22 | 0     | 1    | 0 |
| IPR004566     | 1.08  | 1    | 1.08  | 0    | 0 |
| IPR004569     | 1.02  | 0    | 1.02  | 0    | 0 |
| PTHR15715:SF2 | 2.33  | 2.33 | 0     | 0    | 0 |
| IPR015832     | 1.25  | 0    | 1     | 1.33 | 0 |
| IPR009668     | 1.27  | 1.27 | 0     | 0    | 0 |
| IPR009664     | 1.05  | 1    | 1.05  | 0    | 0 |
| IPR009660     | 1.07  | 0    | 1.07  | 0    | 0 |
| IPR009663     | 1.26  | 0    | 1.26  | 0    | 0 |
| IPR001133     | 1.71  | 2.31 | 1.66  | 1.62 | 0 |
| IPR021578     | 2.71  | 0    | 0     | 2.71 | 0 |
| IPR021577     | 1     | 0    | 1     | 1    | 0 |
| IPR021576     | 1     | 0    | 1     | 0    | 0 |
| IPR003795     | 1.17  | 1    | 1.14  | 1.42 | 0 |
| IPR011206     | 1     | 0    | 1     | 0    | 0 |
| IPR011204     | 1.17  | 0    | 1.17  | 1.25 | 0 |
| IPR011200     | 1.1   | 0    | 1.1   | 1    | 0 |
| IPR011201     | 1.17  | 0    | 1.17  | 0    | 0 |
| IPR009086     | 1     | 0    | 1     | 0    | 0 |
| PTHR13676     | 1.18  | 1.18 | 0     | 0    | 0 |
| PTHR17314     | 2     | 2    | 0     | 0    | 0 |
| PTHR13672     | 1.67  | 1.67 | 0     | 0    | 0 |
| PTHR13673     | 1.3   | 1.3  | 0     | 0    | 0 |
| IPR010557     | 1.15  | 0    | 1.15  | 0    | 0 |
| IPR014074     | 1.03  | 0    | 1.03  | 0    | 0 |
| IPR007951     | 9     | 9    | 0     | 0    | 0 |
| IPR016697     | 1.17  | 1.17 | 0     | 0    | 0 |
| IPR013885     | 1.28  | 1.28 | 0     | 0    | 0 |
| IPR016340     | 1     | 1    | 0     | 0    | 0 |
| PF11115       | 1     | 0    | 1     | 0    | 0 |
| IPR009363     | 1.23  | 0    | 1.23  | 0    | 0 |
| PTHR16836     | 4.2   | 4.2  | 0     | 0    | 0 |

|                |       |       |       |   |   |
|----------------|-------|-------|-------|---|---|
| PTHR13293:SF6  | 1.89  | 1.89  | 0     | 0 | 0 |
| IPR007294      | 1.07  | 0     | 1.09  | 1 | 0 |
| PF09653        | 1     | 0     | 1     | 0 | 0 |
| PTHR10283:SF41 | 1.2   | 0     | 1.2   | 0 | 0 |
| PD472859       | 1.52  | 1.52  | 0     | 0 | 0 |
| PTHR22068      | 1.17  | 1.17  | 0     | 0 | 0 |
| TIGR02473      | 1     | 0     | 1     | 0 | 0 |
| PTHR21080      | 1.07  | 1.07  | 0     | 0 | 0 |
| IPR008849      | 1.69  | 1.69  | 0     | 0 | 0 |
| IPR008846      | 2.64  | 0     | 2.64  | 0 | 0 |
| IPR008840      | 1.19  | 0     | 1.19  | 0 | 0 |
| IPR008841      | 1.85  | 0     | 1.85  | 0 | 0 |
| MF_01299       | 1     | 0     | 1     | 0 | 0 |
| IPR008022      | 1.65  | 0     | 1.65  | 0 | 0 |
| IPR008028      | 1     | 1     | 0     | 0 | 0 |
| IPR003452      | 1.5   | 1.5   | 0     | 0 | 0 |
| IPR003454      | 1.51  | 0     | 1.59  | 1 | 0 |
| IPR003459      | 16.25 | 0     | 16.25 | 0 | 0 |
| IPR016953      | 1.67  | 1.67  | 0     | 0 | 0 |
| IPR007204      | 1.48  | 1.48  | 0     | 0 | 0 |
| MF_00653       | 1.02  | 0     | 1.02  | 0 | 0 |
| IPR012864      | 3.16  | 3.16  | 0     | 0 | 0 |
| IPR008473      | 1.1   | 0     | 1.1   | 0 | 0 |
| IPR008472      | 23.47 | 23.47 | 0     | 0 | 0 |
| IPR008470      | 1.07  | 1.38  | 1     | 0 | 0 |
| IPR008479      | 2.03  | 4.75  | 1     | 0 | 0 |
| IPR008478      | 2.67  | 0     | 2.67  | 0 | 0 |
| IPR010890      | 1.03  | 0     | 1.03  | 0 | 0 |
| TIGR03034      | 1     | 0     | 1     | 0 | 0 |
| IPR015663      | 1.5   | 1.5   | 0     | 0 | 0 |
| IPR015664      | 1.33  | 1.33  | 0     | 0 | 0 |
| IPR015667      | 1.8   | 1.8   | 0     | 0 | 0 |
| IPR015669      | 1.67  | 1.67  | 0     | 0 | 0 |
| IPR008783      | 1.5   | 1.5   | 0     | 0 | 0 |
| IPR016818      | 1.1   | 1.1   | 0     | 0 | 0 |
| PTHR12860      | 1.24  | 1.24  | 0     | 0 | 0 |
| IPR016812      | 1     | 1     | 0     | 0 | 0 |
| IPR016813      | 1     | 1     | 0     | 0 | 0 |
| IPR009787      | 1.23  | 1.23  | 0     | 0 | 0 |
| PTHR13191      | 1.16  | 1.16  | 0     | 0 | 0 |
| PD027692       | 1     | 0     | 1     | 0 | 0 |
| IPR009438      | 7.5   | 7.5   | 0     | 0 | 0 |
| IPR009439      | 2.36  | 3     | 1.25  | 0 | 0 |
| IPR009436      | 1.24  | 1.24  | 0     | 0 | 0 |
| IPR009431      | 3.86  | 3.86  | 0     | 0 | 0 |
| IPR009432      | 1.28  | 1.28  | 0     | 0 | 0 |
| PF11777        | 1.07  | 0     | 1.07  | 0 | 0 |
| IPR006967      | 1.44  | 1     | 1.44  | 0 | 0 |
| IPR006961      | 1     | 0     | 1     | 0 | 0 |
| IPR010740      | 2     | 2     | 0     | 0 | 0 |
| IPR010749      | 2.05  | 0     | 2.05  | 0 | 0 |
| PTHR15104      | 1.56  | 1.56  | 0     | 0 | 0 |
| PTHR12459      | 2.22  | 2.22  | 0     | 0 | 0 |
| PTHR16208:SF4  | 1.8   | 1.8   | 0     | 0 | 0 |
| PTHR21244      | 1.12  | 1.12  | 0     | 0 | 0 |
| PTHR13063:SF2  | 1.14  | 1.14  | 0     | 0 | 0 |
| PTHR11968:SF26 | 1.25  | 1.4   | 1     | 0 | 0 |
| IPR020965      | 1     | 1     | 1     | 0 | 0 |
| IPR020348      | 1     | 0     | 1     | 0 | 0 |
| PTHR22181      | 1.07  | 1.07  | 0     | 0 | 0 |
| IPR015465      | 1     | 1     | 1     | 0 | 0 |
| IPR021926      | 1.03  | 0     | 1.03  | 0 | 0 |
| IPR021927      | 2.14  | 0     | 2.14  | 0 | 0 |
| IPR021920      | 1.25  | 2.22  | 1     | 0 | 0 |
| IPR021921      | 1.19  | 0     | 1.19  | 0 | 0 |
| PTHR22234      | 2.33  | 2.33  | 0     | 0 | 0 |
| PTHR21765      | 1.33  | 1.33  | 0     | 0 | 0 |
| PTHR21763      | 1.1   | 1.1   | 0     | 0 | 0 |
| IPR018652      | 1     | 0     | 1     | 1 | 0 |

|                |       |       |      |      |   |
|----------------|-------|-------|------|------|---|
| IPR018650      | 1.45  | 0     | 1.47 | 1    | 0 |
| IPR018654      | 1.08  | 0     | 1.08 | 0    | 0 |
| IPR009239      | 1     | 0     | 1    | 0    | 0 |
| IPR009233      | 1.4   | 0     | 1.4  | 0    | 0 |
| IPR009230      | 1     | 1     | 0    | 0    | 0 |
| IPR009231      | 1.75  | 1.75  | 0    | 0    | 0 |
| PTHR11571      | 1     | 1     | 1    | 0    | 0 |
| PTHR13382      | 1.23  | 1.23  | 0    | 0    | 0 |
| IPR009901      | 1.41  | 0     | 1.41 | 0    | 0 |
| IPR009907      | 1.03  | 0     | 1.03 | 0    | 0 |
| IPR007339      | 1.17  | 0     | 1.17 | 0    | 0 |
| IPR007503      | 1     | 0     | 0    | 1    | 0 |
| IPR007501      | 1     | 0     | 0    | 1    | 0 |
| IPR010239      | 1.84  | 0     | 1.84 | 0    | 0 |
| PTHR10153:SF1  | 1.14  | 1.14  | 0    | 0    | 0 |
| PTHR16046:SF4  | 1.75  | 1.75  | 0    | 0    | 0 |
| PF07091        | 1.04  | 0     | 1.04 | 0    | 0 |
| IPR001624      | 1.14  | 1     | 1.14 | 0    | 0 |
| PD109676       | 1     | 0     | 1    | 0    | 0 |
| IPR019241      | 1.12  | 0     | 1.12 | 0    | 0 |
| IPR008622      | 1.04  | 1     | 1.04 | 0    | 0 |
| IPR008628      | 1.34  | 1.4   | 1    | 0    | 0 |
| IPR005019      | 1.28  | 6.38  | 1.19 | 1.33 | 0 |
| IPR009579      | 1.02  | 0     | 1.02 | 0    | 0 |
| IPR009573      | 1     | 0     | 0    | 1    | 0 |
| IPR009574      | 1.02  | 0     | 1.02 | 0    | 0 |
| IPR009576      | 1.39  | 0     | 1.39 | 0    | 0 |
| IPR002544      | 15.58 | 15.58 | 0    | 0    | 0 |
| IPR014368      | 1     | 1     | 0    | 0    | 0 |
| IPR014367      | 1     | 1     | 0    | 0    | 0 |
| PF11520        | 1.25  | 0     | 0    | 1.25 | 0 |
| PTHR14469      | 2.8   | 2.8   | 0    | 0    | 0 |
| PTHR22430      | 1.09  | 1.09  | 0    | 0    | 0 |
| TIGR02122      | 1.28  | 0     | 1.29 | 1    | 0 |
| PTHR11732:SF2  | 1     | 0     | 1    | 0    | 0 |
| PTHR21029:SF1  | 1.33  | 1.33  | 0    | 0    | 0 |
| IPR007746      | 1.05  | 0     | 1.05 | 0    | 0 |
| IPR007747      | 1.91  | 1.91  | 0    | 0    | 0 |
| IPR000779      | 2.64  | 2.64  | 0    | 0    | 0 |
| IPR016929      | 1.45  | 0     | 1.45 | 0    | 0 |
| PTHR23231:SF1  | 1     | 1     | 0    | 0    | 0 |
| PD575093       | 2     | 2     | 0    | 0    | 0 |
| IPR013472      | 1.17  | 0     | 1.17 | 0    | 0 |
| IPR005372      | 1.14  | 0     | 1.14 | 1    | 0 |
| IPR005371      | 1.05  | 0     | 1.05 | 0    | 0 |
| PTHR11915:SF30 | 1.2   | 1.2   | 0    | 0    | 0 |
| IPR021067      | 1.48  | 4     | 1.06 | 0    | 0 |
| PTHR22373      | 1     | 1     | 0    | 0    | 0 |
| IPR019088      | 1.02  | 0     | 1.02 | 0    | 0 |
| IPR019089      | 1.5   | 0     | 1.56 | 1    | 0 |
| PTHR13547      | 1.14  | 1.14  | 0    | 0    | 0 |
| PTHR13543      | 1     | 1     | 0    | 0    | 0 |
| PTHR13541      | 1     | 1     | 0    | 0    | 0 |
| PTHR19241:SF20 | 2.33  | 2.33  | 0    | 0    | 0 |
| IPR021680      | 6.82  | 3     | 7.2  | 0    | 0 |
| IPR021687      | 1.12  | 0     | 1.12 | 0    | 0 |
| IPR018561      | 1.02  | 0     | 1.02 | 0    | 0 |
| PTHR23159:SF4  | 1.17  | 1.17  | 0    | 0    | 0 |
| PTHR23159:SF5  | 3.5   | 3.5   | 0    | 0    | 0 |
| PTHR11941      | 1.33  | 1.38  | 1    | 0    | 0 |
| IPR005081      | 1.02  | 0     | 1.02 | 0    | 0 |
| IPR011428      | 3.77  | 0     | 3.77 | 0    | 0 |
| IPR014617      | 1     | 0     | 1    | 0    | 0 |
| IPR013869      | 1.43  | 1.43  | 0    | 0    | 0 |
| IPR013862      | 1     | 1     | 0    | 0    | 0 |
| PD128250       | 1     | 0     | 1    | 0    | 0 |
| IPR003162      | 1.47  | 1.47  | 0    | 0    | 0 |
| PF05863        | 1.14  | 1.14  | 0    | 0    | 0 |
| PTHR14663      | 1.15  | 1.15  | 0    | 0    | 0 |

|                |      |      |      |      |   |
|----------------|------|------|------|------|---|
| IPR016618      | 1    | 0    | 1    | 1    | 0 |
| IPR016616      | 1.56 | 1.56 | 0    | 0    | 0 |
| IPR016617      | 1.33 | 1.33 | 0    | 0    | 0 |
| PF10824        | 4.23 | 0    | 4.23 | 0    | 0 |
| PF10828        | 1.28 | 0    | 1.28 | 0    | 0 |
| PTHR10514:SF3  | 1.67 | 1.67 | 0    | 0    | 0 |
| IPR004248      | 4    | 0    | 4    | 0    | 0 |
| IPR018920      | 1    | 0    | 1    | 0    | 0 |
| IPR018921      | 1.05 | 0    | 1.05 | 0    | 0 |
| IPR018922      | 1.02 | 1.17 | 1    | 0    | 0 |
| IPR018924      | 1    | 0    | 1    | 0    | 0 |
| IPR018927      | 1.2  | 0    | 1.2  | 0    | 0 |
| PD027184       | 1    | 0    | 1    | 0    | 0 |
| TIGR01903      | 1    | 0    | 1    | 1    | 0 |
| PTHR13024      | 1.25 | 1.25 | 0    | 0    | 0 |
| IPR020603      | 1.97 | 2    | 1.98 | 1    | 0 |
| IPR008018      | 1.76 | 0    | 1.76 | 0    | 0 |
| IPR008015      | 2.61 | 2.61 | 0    | 0    | 0 |
| IPR008014      | 2    | 2    | 0    | 0    | 0 |
| IPR020530      | 1    | 0    | 1    | 0    | 0 |
| IPR020532      | 1.38 | 1.38 | 0    | 0    | 0 |
| IPR020533      | 2.33 | 2.33 | 0    | 0    | 0 |
| PF05457        | 4.38 | 0    | 0    | 4.38 | 0 |
| TIGR03431      | 1.02 | 1    | 1.02 | 0    | 0 |
| PTHR23156      | 2.38 | 2.38 | 0    | 0    | 0 |
| PD030115       | 1    | 0    | 1    | 0    | 0 |
| PTHR15739:SF2  | 1    | 1    | 0    | 0    | 0 |
| TIGR02743      | 1.26 | 1    | 1.28 | 0    | 0 |
| TIGR02740      | 1.2  | 0    | 1.2  | 0    | 0 |
| TIGR02745      | 1.17 | 0    | 1.17 | 0    | 0 |
| PTHR21554      | 1    | 1    | 0    | 0    | 0 |
| PTHR21555      | 1    | 1    | 0    | 0    | 0 |
| PTHR21552      | 1.44 | 1.44 | 0    | 0    | 0 |
| IPR008863      | 1.2  | 1    | 1.2  | 0    | 0 |
| IPR022240      | 2    | 0    | 2    | 0    | 0 |
| PD542693       | 1    | 0    | 1    | 0    | 0 |
| IPR003369      | 1.93 | 3.11 | 1.94 | 1.48 | 0 |
| IPR006628      | 4.64 | 5.29 | 1    | 0    | 0 |
| IPR006623      | 1.9  | 1.9  | 0    | 0    | 0 |
| IPR006627      | 2.2  | 2.2  | 0    | 0    | 0 |
| PTHR19242:SF96 | 2    | 2.62 | 1    | 0    | 0 |
| PTHR12587:SF6  | 1.33 | 1.33 | 0    | 0    | 0 |
| IPR021183      | 1    | 1    | 0    | 0    | 0 |
| PF06570        | 1.2  | 0    | 1.21 | 1    | 0 |
| PF07199        | 2.88 | 16   | 1    | 1    | 0 |
| PTHR10183:SF6  | 1.14 | 1.14 | 0    | 0    | 0 |
| PD136539       | 1    | 0    | 1    | 0    | 0 |
| PD195659       | 1    | 0    | 1    | 0    | 0 |
| IPR012575      | 1.17 | 1.17 | 0    | 0    | 0 |
| IPR016893      | 1.82 | 0    | 1.82 | 0    | 0 |
| IPR012576      | 1.11 | 1.11 | 0    | 0    | 0 |
| IPR016896      | 1.12 | 0    | 1.12 | 0    | 0 |
| IPR012570      | 1    | 0    | 1    | 0    | 0 |
| IPR009708      | 1.33 | 0    | 1.33 | 0    | 0 |
| IPR009707      | 1.02 | 0    | 1.02 | 0    | 0 |
| IPR009704      | 1.83 | 1.83 | 0    | 0    | 0 |
| IPR009702      | 1.02 | 0    | 1.03 | 1    | 0 |
| IPR009703      | 1.23 | 1.25 | 1    | 0    | 0 |
| IPR009700      | 1.02 | 0    | 1.02 | 0    | 0 |
| IPR021238      | 1.03 | 0    | 1.03 | 0    | 0 |
| IPR021239      | 1    | 0    | 1    | 0    | 0 |
| IPR021234      | 3.67 | 1    | 3.82 | 0    | 0 |
| IPR021233      | 1.08 | 1    | 1.09 | 0    | 0 |
| IPR002774      | 4.5  | 0    | 0    | 4.5  | 0 |
| IPR002770      | 2.32 | 0    | 2.2  | 2.47 | 0 |
| IPR002771      | 1.74 | 0    | 1.77 | 1.44 | 0 |
| IPR016364      | 1    | 0    | 1    | 0    | 0 |
| PTHR23093:SF3  | 1.17 | 1.17 | 0    | 0    | 0 |
| IPR003824      | 1.19 | 0    | 1.19 | 1.16 | 0 |

|               |      |      |      |      |   |
|---------------|------|------|------|------|---|
| PF05120       | 1.03 | 0    | 1.04 | 1    | 0 |
| PTHR23404:SF1 | 1.46 | 1.46 | 0    | 0    | 0 |
| IPR014796     | 1    | 0    | 1    | 0    | 0 |
| IPR016797     | 1    | 0    | 1    | 0    | 0 |
| IPR016791     | 1    | 0    | 1    | 0    | 0 |
| IPR016793     | 2    | 0    | 2    | 0    | 0 |
| IPR016792     | 1    | 0    | 1    | 0    | 0 |
| IPR014860     | 1.06 | 0    | 1.06 | 0    | 0 |
| PTHR12363:SF6 | 1    | 1    | 0    | 0    | 0 |
| PTHR12363:SF2 | 1    | 1    | 0    | 0    | 0 |
| PTHR15431:SF6 | 1.33 | 1.33 | 0    | 0    | 0 |
| PTHR15431:SF7 | 1.67 | 1.67 | 0    | 0    | 0 |
| IPR016429     | 1    | 0    | 1    | 0    | 0 |
| IPR012962     | 1.36 | 1.88 | 1.62 | 1.09 | 0 |
| IPR012964     | 2    | 0    | 2    | 0    | 0 |
| PTHR21824     | 1.3  | 1.3  | 0    | 0    | 0 |
| PTHR21825     | 1.14 | 1.14 | 0    | 0    | 0 |
| PTHR17097     | 1.5  | 1.5  | 0    | 0    | 0 |
| PD870268      | 1    | 1    | 0    | 0    | 0 |
| TIGR01711     | 1.67 | 0    | 1.67 | 0    | 0 |
| PTHR23263:SF6 | 1.25 | 1.25 | 0    | 0    | 0 |
| TIGR00397     | 1    | 0    | 1    | 0    | 0 |
| PTHR13167:SF2 | 1.14 | 1.14 | 0    | 0    | 0 |
| PD396291      | 1.25 | 1.25 | 0    | 0    | 0 |
| PTHR22107     | 1.25 | 1.25 | 0    | 0    | 0 |
| IPR021438     | 1    | 0    | 1    | 0    | 0 |
| IPR021439     | 1.3  | 0    | 1.3  | 0    | 0 |
| IPR021436     | 1.36 | 0    | 1.36 | 0    | 0 |
| IPR021432     | 1.11 | 0    | 1.11 | 0    | 0 |
| IPR021431     | 1    | 0    | 1    | 0    | 0 |
| PTHR22810     | 1    | 1    | 0    | 0    | 0 |
| PTHR13252     | 1    | 1    | 0    | 0    | 0 |
| PTHR11203:SF4 | 1.02 | 0    | 1.02 | 1    | 0 |
| IPR007852     | 1.26 | 1.26 | 0    | 0    | 0 |
| IPR009988     | 1.17 | 1    | 1.18 | 0    | 0 |
| IPR009989     | 1.14 | 0    | 1.14 | 0    | 0 |
| IPR009983     | 1.02 | 0    | 1.02 | 0    | 0 |
| IPR009986     | 1.04 | 0    | 1.04 | 0    | 0 |
| IPR009987     | 1.24 | 0    | 1.24 | 0    | 0 |
| IPR006452     | 1.15 | 1    | 1.15 | 1.25 | 0 |
| IPR007587     | 1.98 | 1.98 | 0    | 0    | 0 |
| IPR010815     | 1.02 | 0    | 1.02 | 0    | 0 |
| IPR010813     | 1    | 0    | 1    | 0    | 0 |
| PF07018       | 1    | 0    | 1    | 0    | 0 |
| IPR003666     | 1.07 | 1.33 | 1    | 0    | 0 |
| IPR003664     | 1.06 | 0    | 1.06 | 0    | 0 |
| PF06948       | 1    | 0    | 1    | 1    | 0 |
| PD038378      | 1.27 | 0    | 1.27 | 0    | 0 |
| IPR021379     | 1.29 | 0    | 1.3  | 1    | 0 |
| IPR021378     | 1.16 | 0    | 1.16 | 0    | 0 |
| IPR021377     | 1.06 | 0    | 1.06 | 1    | 0 |
| IPR021376     | 1    | 0    | 1    | 0    | 0 |
| PTHR12375:SF1 | 1    | 1    | 0    | 0    | 0 |
| IPR015017     | 1.11 | 0    | 1.11 | 0    | 0 |
| IPR005369     | 1    | 0    | 0    | 1    | 0 |
| IPR016919     | 1    | 0    | 1    | 0    | 0 |
| IPR005363     | 1.03 | 0    | 1.03 | 0    | 0 |
| IPR005365     | 1.29 | 1.29 | 0    | 0    | 0 |
| IPR005366     | 1.49 | 1.49 | 0    | 0    | 0 |
| IPR004947     | 1.53 | 1.61 | 1    | 0    | 0 |
| IPR004944     | 1.91 | 1.91 | 0    | 0    | 0 |
| IPR005096     | 3.25 | 0    | 3.25 | 0    | 0 |
| IPR005095     | 1.11 | 0    | 1.11 | 0    | 0 |
| IPR007473     | 1.01 | 1    | 1.01 | 1    | 0 |
| PTHR13478     | 1.42 | 1.42 | 0    | 0    | 0 |
| IPR010179     | 1.1  | 0    | 1.11 | 1    | 0 |
| IPR008485     | 1.28 | 1.28 | 0    | 0    | 0 |
| PTHR10410:SF3 | 1    | 1    | 0    | 0    | 0 |
| PTHR15221     | 1.67 | 1.67 | 0    | 0    | 0 |

|                |      |      |      |      |   |
|----------------|------|------|------|------|---|
| PTHR15223      | 1.12 | 1.12 | 0    | 0    | 0 |
| IPRO21253      | 1.06 | 1    | 1.07 | 0    | 0 |
| PTHR12791      | 1.12 | 1.12 | 0    | 0    | 0 |
| PTHR12242      | 5.44 | 5.44 | 0    | 0    | 0 |
| PF03346        | 1    | 0    | 1    | 0    | 0 |
| PTHR22572:SF8  | 1.09 | 1.09 | 0    | 0    | 0 |
| PTHR20926      | 1.13 | 1.13 | 0    | 0    | 0 |
| PTHR20927      | 1    | 1    | 0    | 0    | 0 |
| PTHR11210:SF2  | 1.41 | 1.41 | 0    | 0    | 0 |
| IPRO03815      | 1.03 | 0    | 1.03 | 0    | 0 |
| IPRO20157      | 1    | 0    | 1    | 0    | 0 |
| IPRO20155      | 1.03 | 0    | 1.03 | 0    | 0 |
| IPRO20158      | 1.05 | 0    | 1.05 | 0    | 0 |
| IPRO01429      | 11   | 11   | 0    | 0    | 0 |
| IPRO19004      | 1.03 | 1    | 1.03 | 0    | 0 |
| TIGR03583      | 1    | 0    | 1    | 0    | 0 |
| TIGR03580      | 1    | 0    | 1    | 0    | 0 |
| IPRO21603      | 1    | 0    | 0    | 1    | 0 |
| IPRO21607      | 1.06 | 1    | 1.06 | 0    | 0 |
| PF09889        | 1    | 0    | 1    | 1    | 0 |
| TIGR03058      | 2.29 | 0    | 2.29 | 0    | 0 |
| IPRO18757      | 1    | 0    | 1    | 0    | 0 |
| IPRO18753      | 1.49 | 0    | 1.49 | 0    | 0 |
| IPRO15254      | 1.19 | 0    | 1    | 1.22 | 0 |
| IPRO02306      | 1    | 1    | 1    | 0    | 0 |
| PD705231       | 1    | 0    | 1    | 0    | 0 |
| IPRO10379      | 1.02 | 0    | 1.02 | 0    | 0 |
| IPRO10375      | 1.16 | 0    | 1.16 | 0    | 0 |
| IPRO10374      | 1.05 | 0    | 1.05 | 0    | 0 |
| IPRO10377      | 1.01 | 0    | 1.01 | 0    | 0 |
| PD910989       | 1.33 | 1.33 | 0    | 0    | 0 |
| PTHR15860      | 1.29 | 1.29 | 0    | 0    | 0 |
| IPRO01743      | 1.05 | 1.22 | 1    | 0    | 0 |
| PTHR14592:SF4  | 3.17 | 3.17 | 0    | 0    | 0 |
| IPRO09320      | 1.95 | 0    | 1.95 | 0    | 0 |
| IPRO09323      | 1.05 | 0    | 1.05 | 0    | 0 |
| IPRO09324      | 1.32 | 0    | 1    | 1.55 | 0 |
| IPRO09328      | 1.03 | 0    | 1.03 | 0    | 0 |
| IPRO14086      | 1.19 | 0    | 1.19 | 0    | 0 |
| IPRO11101      | 1.27 | 1    | 1.27 | 1    | 0 |
| IPRO14555      | 1.18 | 0    | 1.18 | 1    | 0 |
| IPRO14557      | 1    | 0    | 1    | 0    | 0 |
| IPRO14556      | 1.23 | 0    | 1.23 | 0    | 0 |
| IPRO14550      | 1.55 | 1    | 1.56 | 0    | 0 |
| IPRO14553      | 1.04 | 0    | 1.04 | 0    | 0 |
| TIGR01202      | 1    | 0    | 1    | 0    | 0 |
| TIGR01201      | 3.33 | 0    | 3.33 | 0    | 0 |
| TIGR01206      | 1.19 | 0    | 1.3  | 1    | 0 |
| PTHR15075      | 2.3  | 2.3  | 0    | 0    | 0 |
| PTHR10279:SF2  | 1    | 1    | 0    | 0    | 0 |
| TIGR03116      | 1    | 0    | 1    | 0    | 0 |
| TIGR03110      | 1    | 0    | 1    | 0    | 0 |
| PTHR21331      | 1.08 | 1.08 | 0    | 0    | 0 |
| PTHR21332      | 1.08 | 1.08 | 0    | 0    | 0 |
| PTHR21335      | 1.17 | 1.17 | 0    | 0    | 0 |
| TIGR02243      | 1.36 | 0    | 1.36 | 0    | 0 |
| IPRO12930      | 1.43 | 0    | 1.43 | 0    | 0 |
| PTHR19410:SF19 | 2    | 2.33 | 1    | 0    | 0 |
| PF09513        | 1    | 0    | 1    | 0    | 0 |
| IPRO07171      | 1    | 0    | 1    | 1    | 0 |
| IPRO07170      | 1.17 | 0    | 1.17 | 0    | 0 |
| PD040045       | 1    | 0    | 1    | 0    | 0 |
| IPRO01588      | 5.5  | 5.5  | 0    | 0    | 0 |
| IPRO21100      | 1.23 | 1.23 | 0    | 0    | 0 |
| PTHR13225      | 1.3  | 1.3  | 0    | 0    | 0 |
| IPRO19633      | 1.01 | 1    | 1.01 | 0    | 0 |
| IPRO19639      | 1.4  | 0    | 1.4  | 0    | 0 |
| IPRO15045      | 1.35 | 0    | 1.35 | 0    | 0 |
| IPRO21811      | 1    | 0    | 1    | 0    | 0 |



|                |      |      |      |      |   |
|----------------|------|------|------|------|---|
| IPR021813      | 1    | 0    | 1    | 0    | 0 |
| PF02967        | 1.38 | 0    | 1.38 | 0    | 0 |
| PTHR10285      | 1.12 | 1.27 | 1    | 0    | 0 |
| IPR011740      | 1.18 | 0    | 1.18 | 0    | 0 |
| PTHR23096      | 2.33 | 2.33 | 0    | 0    | 0 |
| PTHR23094      | 1.5  | 1.5  | 0    | 0    | 0 |
| IPR006341      | 1.22 | 0    | 1.22 | 0    | 0 |
| IPR006340      | 1.01 | 0    | 1.01 | 0    | 0 |
| IPR007430      | 1.68 | 1    | 1.68 | 0    | 0 |
| IPR007437      | 1.03 | 0    | 1.03 | 1    | 0 |
| IPR002217      | 1.33 | 0    | 1.33 | 0    | 0 |
| PTHR23098      | 1.67 | 1.67 | 0    | 0    | 0 |
| IPR016719      | 1.33 | 1.33 | 0    | 0    | 0 |
| IPR016718      | 1    | 0    | 1    | 0    | 0 |
| PF04477        | 1    | 0    | 1    | 1    | 0 |
| PTHR15020:SF10 | 1    | 1    | 1    | 0    | 0 |
| TIGR01827      | 1    | 0    | 0    | 1    | 0 |
| PD207074       | 1.33 | 0    | 1.33 | 0    | 0 |
| PTHR13143      | 1.53 | 1.53 | 0    | 0    | 0 |
| PTHR13146      | 3    | 3    | 0    | 0    | 0 |
| IPR004472      | 1.01 | 1    | 1.01 | 1    | 0 |
| PF10723        | 1.16 | 0    | 1.16 | 0    | 0 |
| PTHR19316:SF1  | 1.1  | 1.1  | 0    | 0    | 0 |
| PTHR19316:SF3  | 1.12 | 1.12 | 0    | 0    | 0 |
| PTHR23051      | 1    | 1    | 0    | 0    | 0 |
| PF05245        | 1.1  | 0    | 1.1  | 0    | 0 |
| PTHR14262      | 2.67 | 2.67 | 0    | 0    | 0 |
| TIGR01079      | 1    | 0    | 1    | 0    | 0 |
| PTHR22720      | 1.11 | 1.11 | 0    | 0    | 0 |
| PTHR13824:SF34 | 1.2  | 1.2  | 0    | 0    | 0 |
| IPR003744      | 1.15 | 1    | 1.15 | 1.14 | 0 |
| IPR019717      | 1.03 | 0    | 1.03 | 0    | 0 |
| PF09490        | 1.12 | 0    | 1.13 | 1    | 0 |
| IPR010899      | 1    | 0    | 1    | 0    | 0 |
| IPR001955      | 2.77 | 2.77 | 0    | 0    | 0 |
| IPR000391      | 2.68 | 0    | 2.75 | 1    | 0 |
| IPR018846      | 1    | 1    | 1    | 0    | 0 |
| IPR016997      | 1.4  | 0    | 1.4  | 0    | 0 |
| IPR016994      | 1    | 0    | 1    | 0    | 0 |
| IPR012639      | 1.2  | 0    | 1.2  | 0    | 0 |
| PTHR13388      | 1.6  | 1.6  | 0    | 0    | 0 |
| IPR001040      | 4.16 | 4.16 | 0    | 0    | 0 |
| IPR004679      | 1.19 | 0    | 1.19 | 0    | 0 |
| PTHR11733:SF2  | 1    | 1    | 0    | 0    | 0 |
| IPR004676      | 1.44 | 2    | 1.44 | 1    | 0 |
| IPR004671      | 1.08 | 0    | 1.08 | 0    | 0 |
| IPR002639      | 1.13 | 1.07 | 1.14 | 1    | 0 |
| IPR019469      | 1    | 0    | 1    | 0    | 0 |
| IPR018599      | 1    | 0    | 1    | 0    | 0 |
| IPR018595      | 1    | 0    | 1    | 0    | 0 |
| IPR018596      | 1    | 0    | 0    | 1    | 0 |
| IPR018590      | 1    | 0    | 1    | 0    | 0 |
| IPR018592      | 1.18 | 0    | 1.1  | 2    | 0 |
| PF10872        | 1    | 0    | 1    | 0    | 0 |
| IPR010462      | 1.11 | 0    | 1.11 | 1    | 0 |
| PD352676       | 1    | 1    | 0    | 0    | 0 |
| PTHR10121      | 1.4  | 1.4  | 0    | 0    | 0 |
| IPR018330      | 1.39 | 0    | 1.39 | 0    | 0 |
| IPR010288      | 1.3  | 0    | 1.3  | 0    | 0 |
| IPR010286      | 1.11 | 1.3  | 1.02 | 1    | 0 |
| PTHR21558:SF1  | 2.14 | 2.14 | 0    | 0    | 0 |
| PTHR12714      | 1.09 | 1    | 1.1  | 0    | 0 |
| IPR016508      | 1    | 0    | 1    | 0    | 0 |
| IPR016504      | 1.11 | 0    | 1.11 | 0    | 0 |
| IPR016505      | 1    | 0    | 1    | 0    | 0 |
| IPR016501      | 1    | 0    | 1    | 0    | 0 |
| IPR016502      | 1.04 | 0    | 1.04 | 0    | 0 |
| IPR016503      | 1    | 0    | 1    | 0    | 0 |
| PF10913        | 1    | 0    | 1    | 0    | 0 |

|                |      |      |      |      |   |
|----------------|------|------|------|------|---|
| PF10915        | 1    | 0    | 1    | 0    | 0 |
| IPR010391      | 2.64 | 0    | 2.64 | 0    | 0 |
| TIGR01618      | 1    | 0    | 1    | 0    | 0 |
| PD047280       | 1.33 | 0    | 1.33 | 0    | 0 |
| TIGR00053      | 1    | 0    | 1    | 0    | 0 |
| IPR020229      | 1    | 0    | 1    | 0    | 0 |
| IPR020222      | 1    | 0    | 1    | 0    | 0 |
| IPR020223      | 1    | 0    | 1    | 0    | 0 |
| TIGR03506      | 1    | 1    | 1    | 0    | 0 |
| TIGR03503      | 1    | 0    | 1    | 0    | 0 |
| PD191447       | 1    | 0    | 1    | 0    | 0 |
| IPR010295      | 1.07 | 0    | 1.07 | 0    | 0 |
| PTHR10796:SF35 | 1.67 | 1.67 | 0    | 0    | 0 |
| PD054142       | 2    | 0    | 2    | 0    | 0 |
| PF09800        | 1.57 | 1.57 | 0    | 0    | 0 |
| IPR009638      | 2    | 2.05 | 1    | 0    | 0 |
| TIGR02366      | 1    | 0    | 1    | 0    | 0 |
| IPR010390      | 2.43 | 0    | 2.43 | 0    | 0 |
| PTHR14695:SF4  | 1.19 | 1.19 | 0    | 0    | 0 |
| PD471389       | 1.67 | 1.67 | 0    | 0    | 0 |
| TIGR03281      | 1    | 0    | 0    | 1    | 0 |
| IPR014587      | 1    | 0    | 1    | 0    | 0 |
| MF_01362       | 1    | 0    | 1    | 0    | 0 |
| MF_01360       | 1    | 0    | 1    | 0    | 0 |
| PF07211        | 1    | 0    | 1    | 0    | 0 |
| IPR007047      | 1.95 | 2    | 1.95 | 0    | 0 |
| IPR003746      | 1.1  | 1.43 | 1.07 | 1    | 0 |
| IPR007041      | 1.4  | 0    | 1.4  | 0    | 0 |
| IPR007040      | 1.06 | 0    | 1.06 | 0    | 0 |
| MF_00546       | 1    | 0    | 1    | 0    | 0 |
| IPR021521      | 1.09 | 0    | 1.09 | 0    | 0 |
| IPR021522      | 1    | 0    | 1    | 0    | 0 |
| IPR021525      | 1.38 | 0    | 1.38 | 0    | 0 |
| IPR021529      | 1.13 | 0    | 1.13 | 1.25 | 0 |
| IPR011186      | 1.33 | 1.33 | 0    | 0    | 0 |
| IPR009634      | 1.35 | 0    | 1.35 | 0    | 0 |
| IPR015757      | 7    | 7    | 0    | 0    | 0 |
| PD104362       | 1.11 | 0    | 1.11 | 0    | 0 |
| PTHR13643      | 1.64 | 1.64 | 0    | 0    | 0 |
| PTHR13649      | 1.08 | 1.08 | 0    | 0    | 0 |
