# Supplementary material for: Tethering preferences of domain families co-occurring in multi-domain proteins
Source: Royal Society of Chemistry journal article supplement (doi:10.1039/c3mb25481j), 2013-03-07
Supplement: c3mb25481j_6.pdf [file c3mb25481j_6.pdf]

**Supplementary Table ST6** List of few domain families with high (>100) tethering numbers. Their sizes in terms of number of members, average number of members per organism by taking all the organisms involved in the current and the average number of members obtained by considering organisms belonging to eukaryotes, bacteria and archaea separately.

| Family name | Tethering number | Total number of members | Total number of organisms | Average number of members per organism | Average number of members per eukaryotic organism | Average number of members per bacterial organism | Average number of members per archaeal organism |
|-------------|------------------|-------------------------|---------------------------|----------------------------------------|---------------------------------------------------|--------------------------------------------------|-------------------------------------------------|
| IPR003593   | 450              | 91796                   | 904                       | 101                                    | 114                                               | 103                                              | 58                                              |
| IPR003594   | 203              | 28089                   | 877                       | 32                                     | 14                                                | 35                                               | 13                                              |
| IPR001789   | 201              | 33894                   | 823                       | 41                                     | 14                                                | 44                                               | 16                                              |
| IPR002110   | 273              | 32858                   | 463                       | 71                                     | 333                                               | 8                                                | 8                                               |
| IPR002035   | 166              | 3775                    | 680                       | 6                                      | 21                                                | 4                                                | 2                                               |
| IPR013105   | 159              | 2038                    | 572                       | 4                                      | 6                                                 | 3                                                | 3                                               |
